# Supplementary material
Source: bioRxiv or medRxiv preprint supplement (https://www.medrxiv.org/highwire/filestream/71806/field_highwire_adjunct_files/0/19013193-1.pdf)
Supplement: Supplementary file [file 19013193-1.pdf]

# Multimodal neuroimaging and suicidality in a US population-based sample of school-aged children

## Supplemental Material

### eMethods

1. ABCD Study
2. Determination of Suicidality
3. Individual and Environmental Characteristics

**eTable 1.** Definition of variables assessing individual, environmental (family and school) and clinical characteristics

4. Neuroimaging
  - 4.1. Brain structural imaging data
  - 4.2. Resting-state functional imaging data
  - 4.3. Task-based functional imaging data
    - Monetary incentive delay task (MID)
    - Stop signal task (SST)
    - Emotional n-back (EN-back)

**eFigure 1.** Sample selection flowchart

- 4.4. Imaging data preparation for analysis
- 4.5. Statistical analysis of neuroimaging data.
  - 4.5.1. Testing for difference and equivalence
  - 4.5.2. Testing for predictive value

### eResults

1. Prevalence of suicidality

**eTable 2.** Suicidal ideation, plans and attempts in unrelated ABCD participants

2. Summary of findings

**eTable 3.** Number and percentage of cortical regions found for each possible combined outcome of the Welch's t-test and the Equivalence test by imaging modality and suicidality group comparison – FDR-corrected results

**eTable 4.** Number and percentage of cortical regions found for each possible combined outcome of the Welch's t-test and the Equivalence test by imaging modality and suicidality group comparison – Uncorrected results

### **3. Brain Structural Imaging**

**eTable 5.** Differences in cortical thickness and subcortical volumes between the never-suicidal group and the child-reported suicidality group: Welch's t-test

**eTable 6.** Differences in cortical thickness and subcortical volumes between the never-suicidal group and the caregiver-reported suicidality group: Welch's t-test

**eTable 7.** Differences in cortical thickness and subcortical volumes between the never-suicidal group and the concordantly-reported suicidality group: Welch's t-test

**eFigure 2.** Results of the Equivalence test for differences in subcortical volumes between the never-suicidal group and the child-reported suicidality group.

**eFigure 3.** Results of the Equivalence test for differences in cortical thickness between the never-suicidal group and the child-reported suicidality group.

**eFigure 4.** Results of the Equivalence test for differences in subcortical volumes between the never-suicidal group and the caregiver-reported suicidality group.

**eFigure 5.** Results of the Equivalence test for differences in cortical thickness between the never-suicidal group and the caregiver-reported suicidality group.

**eFigure 6.** Results of the Equivalence test for differences in subcortical volumes between the never-suicidal group and the concordantly-reported suicidality group.

**eFigure 7.** Results of the Equivalence test for differences in cortical thickness between the never-suicidal group and the concordantly-reported suicidality group.

### **4. Resting-State Functional Imaging**

**eTable 8.** Differences in functional connectivity between the never-suicidal group and the child-reported suicidality group: Welch's t-test

**eTable 9.** Differences in functional connectivity between the never-suicidal group and the caregiver-reported suicidality group: Welch's t-test

**eTable 10.** Differences in functional connectivity between the never-suicidal group and the concordantly-reported suicidality group: Welch's t-test

**eFigure 8.** Results of the Equivalence test for differences in connectivity between the never-suicidal group and the child-reported suicidality group.

**eFigure 9.** Results of the Equivalence test for differences in connectivity between the never-suicidal group and the caregiver-reported suicidality group.

**eFigure 10.** Results of the Equivalence test for differences in connectivity between the never-suicidal group and the concordantly-reported suicidality group.

## **5. Task-Based Functional Imaging**

### **Monetary Incentive Delay task (MID)**

#### **Anticipation of large reward vs neutral**

**eTable 11.** Differences in functional activity between the never-suicidal group and the child-reported suicidality group for anticipation of reward: Welch's t-test

**eTable 12.** Differences in functional activity between the never-suicidal group and the caregiver-reported suicidality group for anticipation of reward: Welch's t-test

**eTable 13.** Differences in functional activity between the never-suicidal group and the concordantly -reported suicidality group for anticipation of reward: Welch's t-test

**eFigure 11.** Results of the Equivalence test for differences in functional activity in subcortical regions between the never-suicidal group and the child-reported suicidality group for anticipation of reward

**eFigure 12.** Results of the Equivalence test for differences in functional activity in cortical regions between the never-suicidal group and the child-reported suicidality group for anticipation of reward

**eFigure 13.** Results of the Equivalence test for differences in functional activity in subcortical regions between the never-suicidal group and the caregiver-reported suicidality group for anticipation of reward

**eFigure 14.** Results of the Equivalence test for differences in functional activity in cortical regions between the never-suicidal group and the caregiver-reported suicidality group for anticipation of reward

**eFigure 15.** Results of the Equivalence test for differences in functional activity in subcortical regions between the never-suicidal group and the concordantly-reported suicidality group for anticipation of reward

**eFigure 16.** Results of the Equivalence test for differences in functional activity in cortical regions between the never-suicidal group and the concordantly-reported suicidality group for anticipation of reward

### **Anticipation of large loss vs neutral**

**eTable 14.** Differences in functional activity between the never-suicidal group and the child-reported suicidality group for anticipation of loss: Welch's t-test

**eTable 15.** Differences in functional activity between the never-suicidal group and the caregiver-reported suicidality group for anticipation of loss: Welch's t-test

**eTable 16.** Differences in functional activity between the never-suicidal group and the concordantly -reported suicidality group for anticipation of loss: Welch's t-test

**eFigure 17.** Results of the Equivalence test for differences in functional activity in subcortical regions between the never-suicidal group and the child-reported suicidality group for anticipation of loss

**eFigure 18.** Results of the Equivalence test for differences in functional activity in cortical regions between the never-suicidal group and the child-reported suicidality group for anticipation of loss

**eFigure 19.** Results of the Equivalence test for differences in functional activity in subcortical regions between the never-suicidal group and the caregiver-reported suicidality group for anticipation of loss

**eFigure 20.** Results of the Equivalence test for differences in functional activity in cortical regions between the never-suicidal group and the caregiver-reported suicidality group for anticipation of loss

**eFigure 21.** Results of the Equivalence test for differences in functional activity in subcortical regions between the never-suicidal group and the concordantly-reported suicidality group for anticipation of loss

**eFigure 22.** Results of the Equivalence test for differences in functional activity in cortical regions between the never-suicidal group and the concordantly-reported suicidality group for anticipation of loss

### **Positive vs negative feedback of reward**

**eTable 17.** Differences in functional activity between the never-suicidal group and the child-reported suicidality group for reward feedback: Welch's t-test

**eTable 18.** Differences in functional activity between the never-suicidal group and the caregiver-reported suicidality group for reward feedback: Welch's t-test

**eTable 19.** Differences in functional activity between the never-suicidal group and the concordantly -reported suicidality group for reward feedback: Welch's t-test



**eFigure 23.** Results of the Equivalence test for differences in functional activity in subcortical regions between the never-suicidal group and the child-reported suicidality group for reward feedback

**eFigure 24.** Results of the Equivalence test for differences in functional activity in cortical regions between the never-suicidal group and the child-reported suicidality group for reward feedback

**eFigure 25.** Results of the Equivalence test for differences in functional activity in subcortical regions between the never-suicidal group and the caregiver-reported suicidality group for reward feedback

**eFigure 26.** Results of the Equivalence test for differences in functional activity in cortical regions between the never-suicidal group and the caregiver-reported suicidality group for reward feedback

**eFigure 27.** Results of the Equivalence test for differences in functional activity in subcortical regions between the never-suicidal group and the concordantly-reported suicidality group for reward feedback

**eFigure 28.** Results of the Equivalence test for differences in functional activity in cortical regions between the never-suicidal group and the concordantly-reported suicidality group for reward feedback

### **Positive vs negative feedback of loss**

**eTable 20.** Differences in functional activity between the never-suicidal group and the child-reported suicidality group for loss feedback: Welch's t-test

**eTable 21.** Differences in functional activity between the never-suicidal group and the caregiver-reported suicidality group for loss feedback: Welch's t-test

**eTable 22.** Differences in functional activity between the never-suicidal group and the concordantly -reported suicidality group for loss feedback: Welch's t-test

**eFigure 29.** Results of the Equivalence test for differences in functional activity in subcortical regions between the never-suicidal group and the child-reported suicidality group for loss feedback

**eFigure 30.** Results of the Equivalence test for differences in functional activity in cortical regions between the never-suicidal group and the child-reported suicidality group for loss feedback

**eFigure 31.** Results of the Equivalence test for differences in functional activity in subcortical regions between the never-suicidal group and the caregiver-reported suicidality group for loss feedback

**eFigure 32.** Results of the Equivalence test for differences in functional activity in cortical regions between the never-suicidal group and the caregiver-reported suicidality group for loss feedback

**eFigure 33.** Results of the Equivalence test for differences in functional activity in subcortical regions between the never-suicidal group and the concordantly-reported suicidality group for loss feedback

**eFigure 34.** Results of the Equivalence test for differences in functional activity in cortical regions between the never-suicidal group and the concordantly-reported suicidality group for loss feedback

## **Stop Signal Task (SST)**

### **Incorrect stop vs correct go**

**eTable 23.** Differences in functional activity between the never-suicidal group and the child-reported suicidality group for failed stops: Welch's t-test

**eTable 24.** Differences in functional activity between the never-suicidal group and the caregiver-reported suicidality group for failed stops: Welch's t-test

**eTable 25.** Differences in functional activity between the never-suicidal group and the concordantly-reported suicidality group for failed stops: Welch's t-test

**eFigure 35.** Results of the Equivalence test for differences in functional activity in subcortical regions between the never-suicidal group and the child-reported suicidality group for failed stops

**eFigure 36.** Results of the Equivalence test for differences in functional activity in cortical regions between the never-suicidal group and the child-reported suicidality group for failed stops

**eFigure 37.** Results of the Equivalence test for differences in functional activity in subcortical regions between the never-suicidal group and the caregiver-reported suicidality group for failed stops

**eFigure 38.** Results of the Equivalence test for differences in functional activity in cortical regions between the never-suicidal group and the caregiver-reported suicidality group for failed stops

**eFigure 39.** Results of the Equivalence test for differences in functional activity in subcortical regions between the never-suicidal group and the concordantly-reported suicidality group for failed stops

**eFigure 40.** Results of the Equivalence test for differences in functional activity in cortical regions between the never-suicidal group and the concordantly-reported suicidality group for failed stops

## **Correct stop vs correct go**

**eTable 26.** Differences in functional activity between the never-suicidal group and the child-reported suicidality group for correct stops: Welch's t-test

**eTable 27.** Differences in functional activity between the never-suicidal group and the caregiver-reported suicidality group for correct stops: Welch's t-test

**eTable 28.** Differences in functional activity between the never-suicidal group and the concordantly -reported suicidality group for correct stops: Welch's t-test

**eFigure 41.** Results of the Equivalence test for differences in functional activity in subcortical regions between the never-suicidal group and the child-reported suicidality group for correct stops

**eFigure 42.** Results of the Equivalence test for differences in functional activity in cortical regions between the never-suicidal group and the child-reported suicidality group for correct stops

**eFigure 43.** Results of the Equivalence test for differences in functional activity in subcortical regions between the never-suicidal group and the caregiver-reported suicidality group for correct stops

**eFigure 44.** Results of the Equivalence test for differences in functional activity in cortical regions between the never-suicidal group and the caregiver-reported suicidality group for correct stops

**eFigure 45.** Results of the Equivalence test for differences in functional activity in subcortical regions between the never-suicidal group and the concordantly-reported suicidality group for correct stops

**eFigure 46.** Results of the Equivalence test for differences in functional activity in cortical regions between the never-suicidal group and the concordantly-reported suicidality group for correct stops

## **Emotional n-back**

### **2-back vs 0-back**

**eTable 29.** Differences in functional activity between the never-suicidal group and the child-reported suicidality group for 2-back vs 0-back: Welch's t-test

**eTable 30.** Differences in functional activity between the never-suicidal group and the caregiver-reported suicidality group for 2-back vs 0-back: Welch's t-test

**eTable 31.** Differences in functional activity between the never-suicidal group and the concordantly -reported suicidality group for 2-back vs 0-back: Welch's t-test

**eFigure 47.** Results of the Equivalence test for differences in functional activity in subcortical regions between the never-suicidal group and the child-reported suicidality group for 2-back vs 0-back

**eFigure 48.** Results of the Equivalence test for differences in functional activity in cortical regions between the never-suicidal group and the child-reported suicidality group for 2-back vs 0-back

**eFigure 49.** Results of the Equivalence test for differences in functional activity in subcortical regions between the never-suicidal group and the caregiver-reported suicidality group for 2-back vs 0-back

**eFigure 50.** Results of the Equivalence test for differences in functional activity in cortical regions between the never-suicidal group and the caregiver-reported suicidality group for 2-back vs 0-back

**eFigure 51.** Results of the Equivalence test for differences in functional activity in subcortical regions between the never-suicidal group and the concordantly-reported suicidality group for 2-back vs 0-back

**eFigure 52.** Results of the Equivalence test for differences in functional activity in cortical regions between the never-suicidal group and the concordantly-reported suicidality group for 2-back vs 0-back

### **Emotional vs neutral faces**

**eTable 32.** Differences in functional activity between the never-suicidal group and the child-reported suicidality group for emotional faces: Welch's t-test

**eTable 33.** Differences in functional activity between the never-suicidal group and the caregiver-reported suicidality group for emotional faces: Welch's t-test

**eTable 34.** Differences in functional activity between the never-suicidal group and the concordantly -reported suicidality group for emotional faces: Welch's t-test

**eFigure 53.** Results of the Equivalence test for differences in functional activity in subcortical regions between the never-suicidal group and the child-reported suicidality group for emotional faces

**eFigure 54.** Results of the Equivalence test for differences in functional activity in cortical regions between the never-suicidal group and the child-reported suicidality group for emotional faces

**eFigure 55.** Results of the Equivalence test for differences in functional activity in subcortical regions between the never-suicidal group and the caregiver-reported suicidality group for emotional faces

**eFigure 56.** Results of the Equivalence test for differences in functional activity in cortical regions between the never-suicidal group and the caregiver-reported suicidality group for emotional faces

**eFigure 57.** Results of the Equivalence test for differences in functional activity in subcortical regions between the never-suicidal group and the concordantly-reported suicidality group for emotional faces

**eFigure 58.** Results of the Equivalence test for differences in functional activity in cortical regions between the never-suicidal group and the concordantly-reported suicidality group for emotional faces

**eFigure 59.** Equivalence testing for mean differences in functional activation during the MID task, the SST and EN-back task relating to suicidality

**eTable 35.** Range of effect sizes (Cohen's *d*) and 90% confidence intervals bounds for each imaging modality and suicidality group comparison

**eTable 36.** Results with effect sizes (Cohen's *d*) largest than  $|0.15|$  for each imaging modality in child- and caregiver-suicidality group comparison

## **eReferences**

# eMethods

## 1. The ABCD study

The ABCD study is a 22-site study that aims to follow 9-10-year-olds annually for up to 10 years. The study sample was designed to match the sociodemographic variation of the US population based on a within-site school-based sampling strategy of local randomization and representativeness <sup>1</sup>. All caregivers provided written informed consent and all children provided assent.

## 2. Determination of childhood Suicidality

Suicidality in children and caregivers was assessed with the KSADS-5 <sup>2</sup>. The KSADS-5 assesses the following aspects of suicidality: passive suicidal ideation, active but nonspecific suicidal ideation, suicidal ideation with a specific method, active suicidal ideation with an intent, active suicidal ideation with a plan, preparatory actions toward imminent suicidal behavior, interrupted suicidal attempts, aborted suicidal attempts and suicidal attempts. Children were considered as having experienced suicidality if they or their caregiver endorsed any of the above items as present either in the past or at the time of the assessment. Items relating to self-injurious behavior without suicidal intent were not included. In the ABCD database, child-reported items are in txt file=abcd\_ksad501 and caregiver-reported items are in txt file= abcd\_ksad01. We defined suicidality as endorsing at least one of the following KSADS-5 items:

- (1) Current passive suicidal ideation: child-report item: ksads\_23\_946\_t; caregiver-report item: ksads\_23\_946\_p; 1=endorsed
- (2) Past passive suicidal ideation: Youth report item: ksads\_23\_957\_t; Caregiver-report item: ksads\_23\_957\_p ; 1=endorsed
- (3) Current active but nonspecific suicidal ideation - Youth report item: ksads\_23\_947\_t; Caregiver-report item: ksads\_23\_947\_p; 1=endorsed
- (4) Past active but nonspecific suicidal ideation; child-report item: ksads\_23\_958\_t; caregiver-report item: ksads\_23\_958\_p; 1=endorsed
- (5) Current active suicidal ideation with a specific method: child-report item: ksads\_23\_948\_t; Caregiver-report item: ksads\_23\_948\_p; 1=endorsed
- (6) Past active suicidal ideation with a specific method: child-report item: ksads\_23\_959\_t; caregiver-report item: ksads\_23\_959\_p 1=endorsed
- (7) Current active suicidal ideation with an intent: child-report item: ksads\_23\_949\_t; caregiver-report item: ksads\_23\_949\_p; 1=endorsed

- (8) Past active suicidal ideation with an intent: child-report item: ksads\_23\_960\_t; caregiver-report item: ksads\_23\_960\_p; 1=endorsed
- (9) Current active suicidal ideation with a plan: child-report item: ksads\_23\_950\_t; caregiver-report item: ksads\_23\_950\_p 1=endorsed
- (10) Past active suicidal ideation with a plan: child-report item: ksads\_23\_961\_t; caregiver-report item: ksads\_23\_961\_p 1=endorsed
- (11) Current preparatory Actions toward imminent suicidal behavior: child-report item: ksads\_23\_951\_t; caregiver-report item: ksads\_23\_951\_p; 1=endorsed
- (12) Past preparatory Actions toward imminent suicidal behavior: child-report item: ksads\_23\_962\_t; caregiver-report item: ksads\_23\_962\_p; 1=endorsed
- (13) Current interrupted suicidal attempt: child-report item: ksads\_23\_952\_t; caregiver-report item: ksads\_23\_952\_p ; 1=endorsed
- (14) Past interrupted suicidal attempt: child-report item: ksads\_23\_963\_t; caregiver-report item: ksads\_23\_963\_p; 1=endorsed
- (15) Current aborted suicidal attempt: child-report item: ksads\_23\_953\_t; caregiver-report item: ksads\_23\_953\_p; 1=endorsed
- (16) Past aborted suicidal attempt: child-report item: ksads\_23\_964\_t; caregiver-report item: ksads\_23\_964\_p; 1=endorsed
- (17) Current suicidal attempt: child-report item: ksads\_23\_954\_t; caregiver-report item: ksads\_23\_954\_p; 1=endorsed
- (18) Past suicidal attempt: child-report item: ksads\_23\_965\_t; caregiver-report item: ksads\_23\_965\_p; 1=endorsed

Items not included:

- (19) Self-injurious behavior without suicidal intent: child-report item: ksads\_23\_945\_t ksads\_23\_956\_t; caregiver-report item: ksads\_23\_945\_p ksads\_23\_956\_p;

### 3. Individual and Environmental Characteristics

Details of the assessments protocols in the ABCD study have been published previously<sup>3-5</sup>.and consist of study specific instruments and as well as widely used instruments.

| <b>eTable 1. Definition of variables assessing individual, environmental (family and school) and clinical characteristics</b> |                              |                    |
|-------------------------------------------------------------------------------------------------------------------------------|------------------------------|--------------------|
| <b>Variable</b>                                                                                                               | <b>ABCD Study assessment</b> | <b>Description</b> |
| <b>Individual characteristics</b>                                                                                             |                              |                    |

**eTable 1. Definition of variables assessing individual, environmental (family and school) and clinical characteristics**

| <b>Variable</b>                                           | <b>ABCD Study assessment</b>                                                     | <b>Description</b>                                                                                                                                                                                                                                                                                                                                                                                          |
|-----------------------------------------------------------|----------------------------------------------------------------------------------|-------------------------------------------------------------------------------------------------------------------------------------------------------------------------------------------------------------------------------------------------------------------------------------------------------------------------------------------------------------------------------------------------------------|
| Sex                                                       | ABCD Parent Demographics Survey                                                  | Responses coded as:<br>0=Female<br>1=Male                                                                                                                                                                                                                                                                                                                                                                   |
| Race                                                      | ABCD Parent Demographics Survey                                                  | Participants answered the following question: <i>“What race do you consider the child to be? Please check all that apply”</i><br>Responses coded as:<br>White (0=No, 1=Yes)<br>Black/African American<br>Asian (includes Asian Indian, Chinese, Filipino, Japanese, Korean, and Vietnamese; 0=No, 1=Yes)<br>Multiple races (if participant checked more than one; 0=No, 1=Yes)<br>Other races (0=No, 1=Yes) |
| Ethnicity                                                 | ABCD Parent Demographics Survey                                                  | Participants answered the following question: <i>“Do you consider the child Hispanic/Latino/Latina?”</i><br>Responses coded as:<br>0=No<br>1=Yes                                                                                                                                                                                                                                                            |
| Intelligence                                              | ABCD NIH Toolbox: Cognition Total Composite                                      | Age-Corrected Standard Score                                                                                                                                                                                                                                                                                                                                                                                |
| Exposure to stressful events<br>(Caregiver report)        | Based on the KSADS-5 Section on Traumatic Events                                 | Responses coded as:<br>0=Never exposed<br>1= Exposed                                                                                                                                                                                                                                                                                                                                                        |
| Common childhood medical conditions<br>(Caregiver report) | ABCD Medical History Questionnaire                                               | Participants answered the following question: <i>“Has the child ever been to a doctor for any of these things? Bronchitis, Allergies, Asthma?”</i><br>Responses coded as:<br>0=Never had any common childhood medical condition<br>1= Had at least one common childhood medical condition                                                                                                                   |
| Pubertal development<br>(Caregiver report)                | ABCD Parent Pubertal Development Scale and Menstrual Cycle Survey History (PDMS) | Total score (range 1-5) by sex                                                                                                                                                                                                                                                                                                                                                                              |
| Pubertal development<br>(Child report)                    | ABCD Youth Pubertal Development Scale and Menstrual Cycle Survey History (PDMS)  | Total score (range 1-5) by sex                                                                                                                                                                                                                                                                                                                                                                              |



**eTable 1. Definition of variables assessing individual, environmental (family and school) and clinical characteristics**

| Variable                                                | ABCD Study assessment           | Description                                                                                                                                                                                                                                                                                                                                                                                                                                                                                                                                                                                                                                                                                                                                                                                                                                                                                                  |
|---------------------------------------------------------|---------------------------------|--------------------------------------------------------------------------------------------------------------------------------------------------------------------------------------------------------------------------------------------------------------------------------------------------------------------------------------------------------------------------------------------------------------------------------------------------------------------------------------------------------------------------------------------------------------------------------------------------------------------------------------------------------------------------------------------------------------------------------------------------------------------------------------------------------------------------------------------------------------------------------------------------------------|
| <b>Environmental, family and school characteristics</b> |                                 |                                                                                                                                                                                                                                                                                                                                                                                                                                                                                                                                                                                                                                                                                                                                                                                                                                                                                                              |
| Income level                                            | ABCD Parent Demographics Survey | <p>Participants answered the following question: “<i>What is your TOTAL COMBINED FAMILY INCOME for the past 12 months?</i>”</p> <p>Score ranging from 1 (less than \$5,000) to 10 (\$200,000 and greater).</p>                                                                                                                                                                                                                                                                                                                                                                                                                                                                                                                                                                                                                                                                                               |
| Economic problems in the last year                      | ABCD Parent Demographics Survey | <p>Participants answered the following question: “<i>In the past 12 months, has there been a time when you and your immediate family experienced any of the following: 1) Needed food but couldn't afford to buy it or couldn't afford to go out to get it. 2) Were without telephone service because you could not afford it. 3) Were evicted from your home for not paying the rent or mortgage. 4) Had services turned off by the gas or electric company, or the oil company wouldn't deliver oil because payments were not made. 5) Had someone who needed to see a doctor or go to the hospital but didn't go because you could not afford it. 6) Had someone who needed a dentist but couldn't go because you could not afford it?</i>”</p> <p>Responses coded as:<br/>           0=Did not experience any of the problems above<br/>           1= Experienced at least one of the problems above</p> |
| Primary caregiver level of education                    | ABCD Parent Demographics Survey | <p>Participants answered the following question: “<i>What is the highest grade or level of school you have completed or the highest degree you have received?</i>”</p> <p>Score ranging from 0 (Never attended or Kindergarten only) to 21 (Doctoral degree).</p>                                                                                                                                                                                                                                                                                                                                                                                                                                                                                                                                                                                                                                            |
| Primary caregiver marital/partnership status            | ABCD Parent Demographics Survey | <p>Participants answered the following question: “<i>Are you now married, widowed, divorced, separated, never married or living with a partner?</i>”</p> <p>Responses coded as:<br/>           0= Married/ Living with partner</p>                                                                                                                                                                                                                                                                                                                                                                                                                                                                                                                                                                                                                                                                           |

| <b>eTable 1. Definition of variables assessing individual, environmental (family and school) and clinical characteristics</b> |                                                                                |                                                                                                                                                                                                                                                                                                                                                                                                                                                                                                                                                                                                                                                                                                                                                             |
|-------------------------------------------------------------------------------------------------------------------------------|--------------------------------------------------------------------------------|-------------------------------------------------------------------------------------------------------------------------------------------------------------------------------------------------------------------------------------------------------------------------------------------------------------------------------------------------------------------------------------------------------------------------------------------------------------------------------------------------------------------------------------------------------------------------------------------------------------------------------------------------------------------------------------------------------------------------------------------------------------|
| <b>Variable</b>                                                                                                               | <b>ABCD Study assessment</b>                                                   | <b>Description</b>                                                                                                                                                                                                                                                                                                                                                                                                                                                                                                                                                                                                                                                                                                                                          |
|                                                                                                                               |                                                                                | 1=Widowed/Divorced/Separated/Never married                                                                                                                                                                                                                                                                                                                                                                                                                                                                                                                                                                                                                                                                                                                  |
| Family Conflict (Caregiver report)                                                                                            | ABCD Family Environment Scale: Family Conflict Subscale<br>Modified from PhenX | The number of times events indicating family conflict occurred in the past year are summed for all questions; higher scores indicating greater conflict                                                                                                                                                                                                                                                                                                                                                                                                                                                                                                                                                                                                     |
| Family Conflict (Child report)                                                                                                | ABCD Family Environment Scale: Family Conflict Subscale<br>Modified from PhenX | The number of times events indicating family conflict occurred in the past year are summed for all questions; higher scores indicating greater conflict                                                                                                                                                                                                                                                                                                                                                                                                                                                                                                                                                                                                     |
| Positive school environment (Child report)                                                                                    | ABCD School Risk and Protective Factors Survey: School Environment Subscale    | Score ranging 1-24; higher scores indicating a more perceived positive school environment                                                                                                                                                                                                                                                                                                                                                                                                                                                                                                                                                                                                                                                                   |
| <b>Individual clinical characteristics</b>                                                                                    |                                                                                |                                                                                                                                                                                                                                                                                                                                                                                                                                                                                                                                                                                                                                                                                                                                                             |
| Child general psychopathology (Caregiver report)                                                                              | Child Behavior Checklist (ASEBA)                                               | T-scores for total problems                                                                                                                                                                                                                                                                                                                                                                                                                                                                                                                                                                                                                                                                                                                                 |
| Psychiatric disorders (Caregiver report)                                                                                      | ABCD Parent Diagnostic Interview for DSM-5 Full (KSADS-5)                      | Responses coded as:<br>Any current depressive disorder (includes major depression disorder, dysthymia, and unspecified depressive disorder; 0=No 1=Yes)<br>Any current anxiety disorder (includes generalized anxiety disorder, panic disorder, agoraphobia, separation anxiety disorder, social anxiety disorder, specific phobia, and other specified anxiety disorder, ; 0=No 1=Yes)<br>Current ADHD (includes attention-deficit hyperactivity disorder [ADHD] and unspecified ADHD; 0=No 1=Yes)<br>Current ODD (includes oppositional defiant disorder [ODD]; 0=No 1=Yes)<br>CD (includes conduct disorder; 0=No 1=Yes)<br>Current PTSD (includes post-traumatic stress disorder, and other specified trauma-and stressor-related disorder; 0=No 1=Yes) |
| <b>Family clinical characteristics</b>                                                                                        |                                                                                |                                                                                                                                                                                                                                                                                                                                                                                                                                                                                                                                                                                                                                                                                                                                                             |
| Caregiver general                                                                                                             | Adult Self-Report (ASEBA)                                                      | T-scores for total problems                                                                                                                                                                                                                                                                                                                                                                                                                                                                                                                                                                                                                                                                                                                                 |

**eTable 1. Definition of variables assessing individual, environmental (family and school) and clinical characteristics**

| <b>Variable</b>                                                              | <b>ABCD Study assessment</b>             | <b>Description</b>                                                                                                                                                                                                                                                                                                              |
|------------------------------------------------------------------------------|------------------------------------------|---------------------------------------------------------------------------------------------------------------------------------------------------------------------------------------------------------------------------------------------------------------------------------------------------------------------------------|
| psychopathology<br>(Caregiver report)                                        |                                          |                                                                                                                                                                                                                                                                                                                                 |
| Parental use of mental health services<br>(Caregiver report)                 | ABCD Family History Assessment           | Participants answered the following questions: <i>“Has the biological mother/father of your child ever been to a doctor or a counselor about any emotional or mental problems, or problems with alcohol or drugs?”</i><br>Responses coded as:<br>0=No<br>1= Yes                                                                 |
| Parental hospitalization due to mental health problems<br>(Caregiver report) | ABCD Family History Assessment           | Participants answered the following questions: <i>“Has the biological mother/father of your child ever been hospitalized because of emotional or mental problems, or drug or alcohol problems?”</i><br>Responses coded as:<br>0=No<br>1= Yes                                                                                    |
| Parental history of depression<br>(Caregiver report)                         | ABCD Family History Assessment           | Participants answered the following questions: <i>“Has the biological mother/father of your child ever suffered from depression, that is, have they felt so low for a period of at least two weeks that they hardly ate or slept or couldn't work or do whatever they usually do?”</i><br>Responses coded as:<br>0=No<br>1= Yes |
| Parental history of attempted or committed suicide<br>(Caregiver report)     | ABCD Family History Assessment           | Participants answered the following questions: <i>“Has the biological mother/father of your child ever attempted or committed suicide?”</i><br>Responses coded as:<br>0=No<br>1= Yes                                                                                                                                            |
| Maternal alcohol/substance use during pregnancy<br>(Caregiver report)        | ABCD Developmental History Questionnaire | Participants answered the following question: <i>“Once the biological mother knew she was pregnant, was she using any of the following? Tobacco, Alcohol, Marijuana, Cocaine, Heroin/Morphine, Oxycontin”</i>                                                                                                                   |

**eTable 1. Definition of variables assessing individual, environmental (family and school) and clinical characteristics**

| Variable                                                                                                                             | ABCD Study assessment | Description                                           |
|--------------------------------------------------------------------------------------------------------------------------------------|-----------------------|-------------------------------------------------------|
|                                                                                                                                      |                       | Responses were coded as<br>0= No<br>1= Yes if any use |
| Further details can also be found at <a href="https://nda.nih.gov/data_dictionary.html">https://nda.nih.gov/data_dictionary.html</a> |                       |                                                       |

#### 4. Neuroimaging

Participants underwent magnetic resonance imaging (MRI) scanning to obtain 3D T<sub>1</sub>- and 3D T<sub>2</sub>-weighted images, diffusion weighted images and resting state- and task-functional data using standard adult-size multi-channel coils capable of multiband echo planar imaging (EPI) acquisitions. The data from different MR modalities were acquired in a fixed order as follows: 3D T<sub>1</sub>-weighted images, 2 runs of resting state fMRI (rs-fMRI), diffusion weighted images, 3D T<sub>2</sub>-weighted images, 1–2 more runs of resting state fMRI and the task-based fMRI, which included a modified monetary incentive delay task (MID)<sup>6</sup>, stop signal task (SST)<sup>7</sup> and emotional n-back task (EN-back)<sup>8</sup>. The order of the three fMRI tasks was randomized across participants. Scan sessions typically required ~2 hours to complete, including a mid-session rest break if the child requested one. The acquisition protocol was harmonized across three 3T scanner systems (Siemens Prisma, General Electric 750 and Philips). Before the scan, participants completed a screening questionnaire for MR contraindications and were familiarized to the scanner environment with a simulator using motion compliance training to decrease motion artefacts. Details of the acquisition protocols and procedures, as well as a detailed description of the image processing and analyses have been published in Casey et al (2018)<sup>9</sup> and Hagler et al (2019)<sup>10</sup>, respectively. Below we summarize this information and describe the selection criteria of participants for the current study.

Note: On December 2019, an ABCD Study release on Known Issues informed of incorrect post-processing on all task and resting-state fMRI data obtained in Phillips scanners. Specifically, the field map direction for these data was mistakenly flipped, which led to increased distortion in processed fMRI images. For this reason, participants with fMRI data collected in Phillips scanners were excluded from fMRI analyses in the current study.

##### 4.1 Brain structural imaging data

Following pre-processing, cortical reconstruction and volumetric segmentation of structural datasets was conducted using FreeSurfer image analysis suite (version 5.3.0; <http://surfer.nmr.mgh.harvard.edu/>). For each individual, we considered FreeSurfer-derived regional cortical thickness measures (n=68) and regional subcortical volume measures (n=18). Regional volumetric and cortical thickness measures were respectively adjusted for total intracranial volume and mean cortical thickness.

ABCD unrelated participants with complete suicidality data were excluded from the analysis of structural data for the following technical and medical reasons:

(1) Poor image quality according to the Quality Control and Recommended Inclusion Criteria for structural data provided in the ABCD documentation (**n=671**). These are outlined in a pdf document as part of the Release Notes Imaging Instruments folder. According exclusions were based on the rating of the following items:

Txt file= abcd\_mrfindings01; scan excluded if mrif\_score  $\geq 3$

Txt file= ABCD MRI QC Raw Part 1; item= iqc\_t1\_ok\_ser; scan excluded if 0

(2) Incomplete or poorly Freesurfer deconstruction (**n=580**)

Txt file= FreeSurfer QC; item= fsqc\_qc; scan excluded if 0

(3) Severe medical conditions likely to affect brain structure (**n=505**): We excluded participants diagnosed with traumatic brain injury with loss of consciousness; muscular dystrophy, multiple sclerosis, sickle cell anemia, neoplastic disorders; cerebral palsy, diabetes, epilepsy, lead Poisoning, cardiac and kidney disorders. The relevant items in the ABCD documentation are:

Text file= ABCD Sum Scores Traumatic Brain Injury: item= tbi\_ss\_ntbiloc; scan excluded if  $>0$

Txt file=ABCD Parent Medical History Questionnaire (MHX): medhx\_2l, medhx\_2m, medhx\_2p, medhx\_2e, medhx\_2f, medhx\_2g, medhx\_2h, medhx\_2k, medhx\_2o, medhx\_2j; for all items, scan excluded if 1

#### ***4.2 Resting-state functional imaging data***

During collection of rs-fMRI data, children viewed a crosshair for 20 minutes. To quantify connectivity strength during rs-fMRI, a seed-based correlational approach was applied on parcellated regions<sup>11-13</sup>. Using a functional atlas<sup>11</sup> we grouped the cortical-surface regions into 12 predefined large-scaled networks: auditory, cingulo-opercular, cingulo-parietal, default-mode, dorsal-attention, fronto-parietal, retrosplenial-temporal, salience, sensorimotor-hand, sensorimotor-mouth, ventral-

attention, and visual networks. We computed functional connectivity estimates using Fisher  $r$  to  $z$  transformations of the mean correlations between pairs of regions examined. Specifically, we computed the within-network functional connectivity ( $n=12$ ), the between-network functional connectivity ( $n=66$ ) and the functional connectivity between each network and 19 subcortical regions ( $n=228$ ).

ABCD unrelated participants with complete suicidality data were excluded from the rs-fMRI analyses for the following technical and medical reasons:

- (1) Incidental findings (e.g. hydrocephalus, herniation), unsatisfactory quality control (QC) for rs-fMRI for at least 4 runs (ABCD QC criteria recommendation requires at least 1 only), unsatisfactory T1, had less than 375 data points worth of 1 run, incomplete or poorly Freesurfer deconstruction, or missing information in these indicators ( **$n=2282$** )

Txt file=MR Findings; item = abcd\_mrfindings01; scan excluded if  $mrif\_score \geq 3$ ,  $mrif\_hydrocephalus="yes"$ ,  $mrif\_herniation="yes"$ .

Txt file= ABCD MRI QC Raw Part 1: item= iqc\_rsfmri\_ok\_ser; scan excluded if  $<4$

Txt file= ABCD MRI QC Raw Part 1; item= iqc\_t1\_ok\_ser; scan excluded if 0

Txt file= ABCD rsfMRI Gordon Network Correlations: included if  $rsfmri\_c\_ngd\_ntpoints > 375$

Txt file= FreeSurfer QC; item= fsqc\_qc; scan excluded if 0

- (2) Missing ROI-based tabulated data ( **$n=1029$** )
- (3) Phillips scan data ( **$n=527$** )

### ***4.3 Task-based functional imaging data***

We examined activations evoked by three tasks: a modified monetary incentive delay task (MID) <sup>6</sup>, stop signal task (SST) <sup>7</sup> and emotional n-back task (EN-back) <sup>8,14</sup>, selected to probe reward processing, inhibitory control, and working memory, respectively <sup>9</sup>, with the latter also including affective processing. The processes underlying these tasks have been implicated in suicidal behavior in clinical samples of older youth and adults <sup>15-25</sup>. For each task, task-based changes in the blood-oxygen-dependent (BOLD) signal were computed at the individual subject level using a general linear model (GLM) implemented in AFNI's 3dDeconvolve <sup>26</sup>. Average time courses were calculated for 167 regions-of-interest (ROI) derived from the Freesurfer cortical parcellation ( $n=148$ ) <sup>27</sup> and subcortical segmentation ( $n=19$ ) <sup>28</sup>.

The MID task started with a cue, indicating possible earnings: large reward (\$5), small reward (\$0.20), no money (\$0), small loss (\$0.20), and large loss (\$5). After a variable period following the cue, the children were shown a brief target. To either earn reward or avoid loss, children needed to respond before the target disappeared. Following the response, children saw the outcome feedback of the trial. For the MID we considered measures derived from the following contrasts: *anticipation of large reward vs neutral condition* (i.e, no gain or loss), *anticipation of large loss vs neutral condition*, *reward positive feedback vs reward negative feedback* and *loss positive feedback vs loss negative feedback*. For reward anticipation, we focused on large reward, since it has been shown to maximize this process <sup>29</sup>.

In the SST, each trial begins with the presentation of a leftward or rightward pointing arrow (“Go” stimulus), and participants are instructed to indicate the direction of the arrow, responding “as quickly and accurately as possible”. When the arrow is followed unpredictably by a “Stop Signal” (an up-right arrow presented for 300 ms) participants are required to withhold or interrupt the motor response to the “Go” stimulus. For the SST we considered measures derived from the following contrasts that are relevant to inhibitory control: *incorrect stop vs correct go* and *correct stop vs correct go*.

For the EN-back task, depending on the condition, children needed to respond whether the stimulus was the same as (1) the one shown 2 trials earlier (2-back) or (2) the target stimulus shown at the beginning (0-back). Stimuli included houses and emotional (happy or fearful) and non-emotional faces. For the EN-back task we considered measures derived from the *2-back vs 0-back* (i.e., sensorimotor control) contrast regardless of stimulus valence as an index of working memory and measures derived from the contrast *emotional vs neutral faces* as an index of emotional valence processing independent of working-memory.

ABCD unrelated participants with complete suicidality data were excluded from the task-based fMRI analyses for the following technical and medical reasons:

- **Monetary incentive delay task (MID)**

(1) Incidental findings (e.g. hydrocephalus, herniation), unsatisfactory quality control (QC) for MID fMRI, unsatisfactory T1, incomplete or poorly Freesurfer deconstruction, excessive motion, unacceptable performance, or missing information in these indicators (**n=824**)

Txt file= abcd\_mrfindings01; scan excluded if `mrif_score ≥ 3`, `mrif_hydrocephalus="yes"`, `mrif_herniation="yes"`.

Txt file= ABCD MRI QC Raw Part 2; item= `iqc_mid_ok_ser`; scan excluded if 0

Txt file= ABCD MRI QC Raw Part 1; item= `iqc_t1_ok_ser`; scan excluded if 0

Txt file= FreeSurfer QC; item= fsqc\_qc; scan excluded if 0

Txt file= ABCD Task fMRI MID Average Beta Weights Part 1: include if  
tfMRI\_mid\_all\_b\_dof > 200

Txt file= ABCD Task fMRI MID Behavior: include if tfMRI\_mid\_beh\_performflag = 1 and  
tfMRI\_mid\_all\_beh\_t\_nt = 100

(2) Missing ROI-based tabulated data (**n=1932**)

(3) Phillips scan data (**n=630**)

- **Stop signal task (SST)**

(1) Incidental findings (e.g. hydrocephalus, herniation), unsatisfactory quality control (QC) for SST fMRI, unsatisfactory T1, incomplete or poorly Freesurfer deconstruction, excessive motion, unacceptable performance, or missing information in these indicators (**n=1047**)

Txt file = abcd\_mrfindings01; scan excluded if mrif\_score  $\geq 3$ , mrif\_hydrocephalus="yes",  
mrif\_herniation="yes".

Txt file= ABCD MRI QC Raw Part 2: item= iqc\_sst\_ok\_ser; scan excluded if 0

Txt file= ABCD MRI QC Raw Part 1; item= iqc\_t1\_ok\_ser; scan excluded if 0

Txt file= FreeSurfer QC; item= fsqc\_qc; scan excluded if 0

Txt file= ABCD Task fMRI SST Average Beta Weights Part 1: include if tfMRI\_sst\_all\_b\_dof  
> 200

Txt file= ABCD Task fMRI SST Behavior: include if tfMRI\_sst\_beh\_performflag = 1

(2) Missing ROI-based tabulated data (**n=2088**)

(3) Phillips scan data (**n=576**)

- **Emotional n-back (EN-back)**

(1) Incidental findings (e.g. hydrocephalus, herniation), unsatisfactory quality control (QC) for SST fMRI, unsatisfactory T1, incomplete or poorly Freesurfer deconstruction, excessive motion, unacceptable performance, or missing information in these indicators (**n=1272**)

Txt file = abcd\_mrfindings01; scan excluded if mrif\_score  $\geq 3$ , mrif\_hydrocephalus="yes",  
mrif\_herniation="yes".

Txt file= ABCD MRI QC Raw Part 2: item= iqc\_nback\_ok\_ser; scan excluded if 0

Txt file= ABCD MRI QC Raw Part 1; item= iqc\_t1\_ok\_ser; scan excluded if 0

Txt file= FreeSurfer QC; item= fsqc\_qc; scan excluded if 0



Txt file= ABCD Task fMRI nBack Average Beta Weights Part 1: include if  
 tfmri\_nback\_all\_b\_dof > 200

Txt file= ABCD Task fMRI nBack Behavior: include if tfmri\_nback\_beh\_performflag = 1

- (2) Missing ROI-based tabulated data (**n=2119**)
- (3) Phillips scan data (**n=528**)

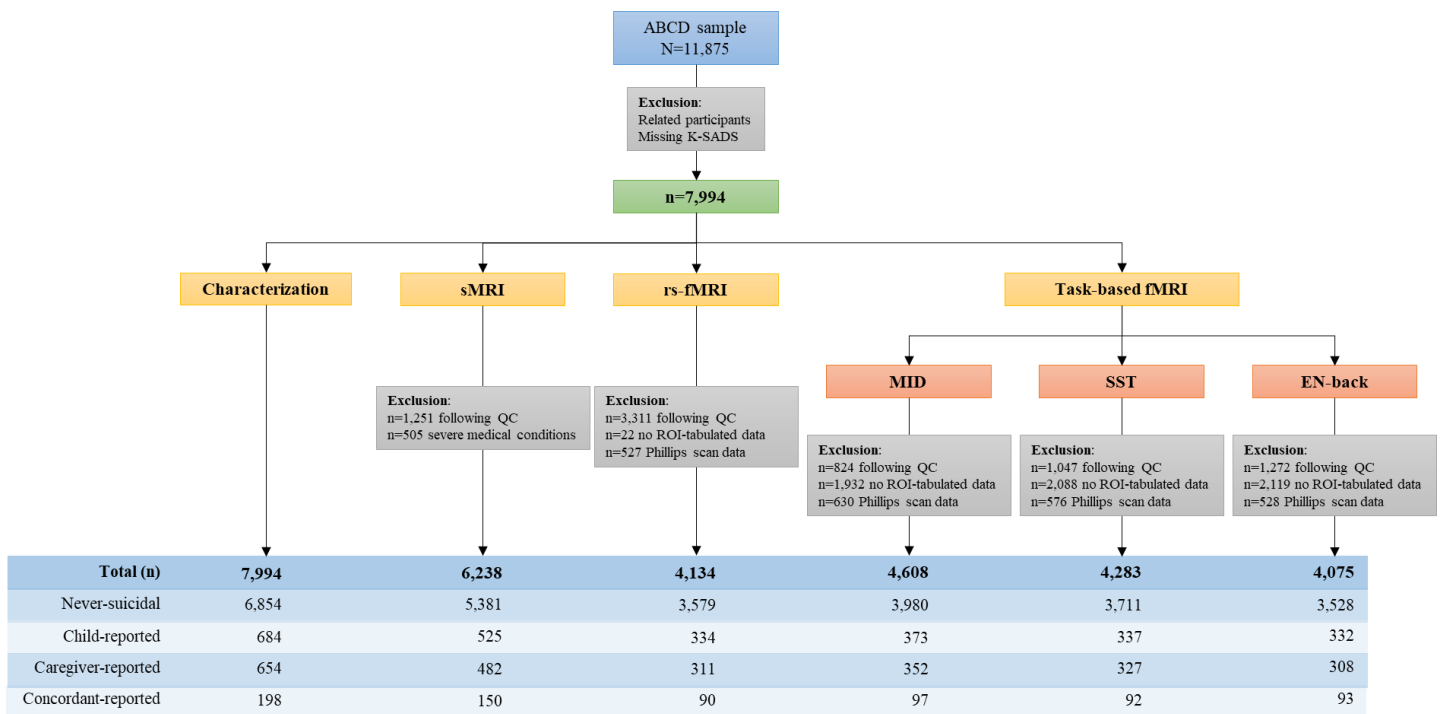

**eFigure 1. Sample selection flowchart**

#### 4.4 Imaging data preparation for analysis

Prior to statistical analysis, the structural and resting-state imaging variables were adjusted for site/scanner effect using ComBat in R (<https://github.com/Jfortin1/ComBatHarmonization>)<sup>30,31</sup>.

Initially used for batch adjustment of genetic data, ComBat uses Empirical Bayes to adjust for between-site variability while preserving biological variability. We did not apply the ComBat method on the task-based fMRI data because using within-individual contrasts alone in the ABCD task-based fMRI data can mitigate scanner-related variance<sup>31</sup>. Finally, for each conducted test with resting-state

and task-based fMRI measures, we calculated the interquartile range (IQR) in order to remove outlier values that were above  $1.5 \times \text{IQR}$ .

## 4.5 Statistical analyses of neuroimaging data

### 4.5.1 Testing for difference and equivalence

The association between suicidality and imaging measures was examined using two complementary approaches. We examined *differences* between groups endorsing suicidality and the never-suicidal group with two-independent sample t-tests; we used Welch's t-tests to account for unequal number of observations. Of note, Welch's t-test is a traditional null hypothesis significance test, in which the null hypothesis is that the true ES of the mean difference between groups is zero. Whereas with this test one can conclude that the effect is statistically different from zero if the null hypothesis is rejected, the absence of effect cannot be statistically supported. That is, after performing the test, if the *p*-value is larger than the prespecified threshold (e.g., 0.05), it is not possible to conclude that there is no effect or that the effect equals zero. It might simply be that the study had not power enough to detect differences. Moreover, regardless of whether a statistically significant effect is found or not, one might want to examine whether such an effect is large enough to be considered meaningful. In these cases, one can examine whether mean differences can be considered equivalent. For these reasons, and given the size of the current study, we examine *equivalence* performing Equivalence tests (which also included Welch's t-tests to account for unequal number of observations). Equivalence testing has been successfully used in prior studies using the ABCD cohort<sup>32</sup> as a safeguard against Type II errors (i.e., false negative results) and against overinterpreting positive results that may arise in large samples despite group differences being minimal (i.e., statistical overpowering)<sup>33</sup>. In equivalence testing, the observed data are statistically compared against *a priori* specified equivalence interval ( $\delta$ ), defined by upper ( $\Delta_U$ ) and lower ( $-\Delta_L$ ) equivalence bounds. The aim of equivalence testing is to reject the null hypothesis that the observed ES (Cohen's *d*) is at least as extreme as the smallest effect size of interest (SESOI) (i.e. the 90%CI of the ES overlaps with the SESOI). Here, we used the "two one-sided tests" (TOST) procedure<sup>34,35</sup> implemented with the *TOSTtwo* function from the library *TOSTER* in R. Given the current sample size and previous results in large samples<sup>36</sup>, the upper ( $\Delta_U$ ) and lower ( $-\Delta_L$ ) equivalence bounds were specified as  $d=0.15$  and  $d=-0.15$  (i.e.,  $\text{SESOI}=|0.15|$ ), which correspond to traditional notions of a "small" ES<sup>37</sup>. That is, in the current study, equivalence was defined as an observed ES with 90% confidence intervals (CI) within -0.15 and 0.15.

Since null-hypothesis significant tests, such as Welch's t-test, and equivalence tests examine two different hypotheses, it is recommended to use both simultaneously<sup>38</sup>. When both tests are performed, there are four possible outcomes: the effect can be 1) statistically different from zero and statistically

equivalent (this is typical of studies with large sample sizes which are powered to detect minimal differences, that are not meaningful effects), 2) not statistically different from zero and statistically equivalent (this is usually the case when the ES is practically zero, not a meaningful effect), 3) statistically different from zero and not statistically equivalent (this is when the ES of the difference is large enough to be considered meaningful), and 4) finally, if the observed ES is neither statistically different from zero nor statistically equivalent, there is insufficient data to draw conclusions and is considered an undetermined result (this is typical of studies with small sample sizes which, albeit reporting ES larger than the pre-specified SESOI, the 90%CI also includes zero). The threshold for statistical significance for both tests was set at  $p < 0.05$  after applying FDR-correction for multiple comparisons.

#### **4.5.2. Testing for predictive value**

To examine the ability of neural correlates to predict suicide cases in our sample we used Precision-Recall Curves (PRC), a widely used tool in the prediction of machine learning algorithms. In contrast to Receiver Operating Characteristic (ROC) curves, PRC provide more accurate information on the performance of a prediction model in cases where there is an imbalance in the observations between the two classes (i.e., when there are many negative cases and very few positive cases, like suicidality in community-based samples)<sup>39</sup>. In those cases, ROC curves can provide an inflated view of performance, and thus the use PRC is preferred. Precision can be defined as how good a model is at predicting true positive cases (i.e., positive predictive value, PPV) and is calculated as the ratio of the number of true positives divided by the sum of the true positives and false positives:

$$Precision (PPV) = TP / (TP + FP)$$

Recall can be defined as how good a model is at predicting all the true positive cases (i.e., Sensitivity) and is calculated as the ratio of the number of true positives divided by the sum of the true positives and the false negatives:

$$Recall (Sensitivity) = TP / (TP + FN)$$

PRC plots show precision values for different thresholds of sensitivity (recall) values. For all effect sizes equal or over our SESOI (i.e.,  $d = |0.15|$ ), We calculated the area under the PRC (AUPRC), which can be interpreted as the average precision across all sensitivity thresholds. The AUC of a random classifier using a ROC approach would be 0.5, given a balanced class distribution. However, with the PRC approach, the AUC for a random classifier would be close to the prevalence of positive cases in

the population calculated as  $y=P/(P+N)$ . On the other hand, a perfect classifier, as in ROC, would have an AUC of 1.

## eResults

### 1. Prevalence of suicidality

| <b>eTable 2. Suicidal ideation, plans and attempts in unrelated ABCD participants (N=7994)</b>                                         |                                   |                                       |                    |
|----------------------------------------------------------------------------------------------------------------------------------------|-----------------------------------|---------------------------------------|--------------------|
| <b>KSADS-5 Items</b>                                                                                                                   | <b>Child-reported suicidality</b> | <b>Caregiver-reported suicidality</b> | <b>Agreement</b>   |
| <b>Past</b>                                                                                                                            | n (%)                             | n (%)                                 | n (%) <sup>a</sup> |
| Passive suicidal ideation                                                                                                              | 469 (5.9)                         | 550 (6.9)                             | 123 (13.7)         |
| Active but nonspecific suicidal ideation                                                                                               | 294 (3.7)                         | 270 (3.8)                             | 54 (10.6)          |
| Suicidal ideation with a specific method                                                                                               | 75 (0.9)                          | 70 (0.9)                              | 5 (3.6)            |
| Active suicidal ideation with an intent                                                                                                | 47 (0.6)                          | 30 (0.4)                              | 2 (2.7)            |
| Active suicidal ideation with a plan                                                                                                   | 29 (0.4)                          | 10 (0.1)                              | 0 (0.0)            |
| Preparatory actions toward imminent suicidal behavior                                                                                  | 34 (0.4)                          | 38 (0.5)                              | 0 (0.0)            |
| Interrupted suicidal attempts                                                                                                          | 10 (0.1)                          | 5 (0.1)                               | 0 (0.0)            |
| Aborted suicidal attempts                                                                                                              | 24 (0.3)                          | 8 (0.1)                               | 0 (0.0)            |
| Suicidal attempts                                                                                                                      | 59 (0.7)                          | 23 (0.3)                              | 9 (12.3)           |
| <b>Current</b>                                                                                                                         |                                   |                                       |                    |
| Passive suicidal ideation                                                                                                              | 98 (1.2)                          | 48 (0.6)                              | 6 (4.3)            |
| Active but nonspecific suicidal ideation                                                                                               | 126 (1.6)                         | 93 (1.2)                              | 10 (4.8)           |
| Suicidal ideation with a specific method                                                                                               | 47 (0.6)                          | 14 (0.2)                              | 1 (1.7)            |
| Active suicidal ideation with an intent                                                                                                | 25 (0.3)                          | 7 (0.1)                               | 1 (3.2)            |
| Active suicidal ideation with a plan                                                                                                   | 20 (0.3)                          | 3 (0.0)                               | 0 (0.0)            |
| Preparatory actions towards imminent suicidal behavior                                                                                 | 17 (0.2)                          | 6 (0.1)                               | 0 (0.0)            |
| Interrupted suicidal attempts                                                                                                          | 4 (0.1)                           | 0 (0.0)                               | 0 (0.0)            |
| Aborted suicidal attempts                                                                                                              | 16 (0.2)                          | 1 (0.0)                               | 0 (0.0)            |
| Suicidal attempts                                                                                                                      | 15 (0.2)                          | 5 (0.1)                               | 1 (5.3)            |
| <b>Total (any endorsement)</b>                                                                                                         | 684 (8.6)                         | 654 (8.2)                             | 198 (17.4)         |
| Child or caregivers could have endorsed more than one item; KSADS-5=Kiddie Schedule for Affective Disorders and Schizophrenia for DSM5 |                                   |                                       |                    |
| <sup>a</sup> Percentage of positive agreement between children and caregivers that endorsed the item                                   |                                   |                                       |                    |

### Neuroimaging

### 2. Summary of findings

**eTable 3. Number and percentage of cortical regions found for each possible combined outcome of the Welch’s t-test and the Equivalence test by imaging modality and suicidality group comparison – FDR-corrected results <sup>a</sup>**

| Task                                | Contrast | Suicidality informant | Statistically equivalent <i>and</i> no statistically different, n (%) | Statistically equivalent <i>and</i> statistically different, n (%) | No statistically equivalent <i>and</i> no statistically different, n (%) | No statistically equivalent <i>and</i> statistically different, n (%) | Overlap of findings across groups with no evidence of equivalence <i>and</i> different (uncorrected) |
|-------------------------------------|----------|-----------------------|-----------------------------------------------------------------------|--------------------------------------------------------------------|--------------------------------------------------------------------------|-----------------------------------------------------------------------|------------------------------------------------------------------------------------------------------|
| <b>sMRI</b>                         |          |                       |                                                                       |                                                                    |                                                                          |                                                                       |                                                                                                      |
| -                                   |          | Child                 | 62 (72.1)                                                             | 0 (0)                                                              | 24 (27.9)                                                                | 0 (0)                                                                 | Thickness<br>None<br>(↓left bank of the superior temporal sulcus, only in caregiver analysis)        |
|                                     |          | Caregiver             | 76 (88.4)                                                             | 0 (0)                                                              | 9 (10.5)                                                                 | 1 (1.2)                                                               |                                                                                                      |
|                                     |          | Concordant            | 0 (0)                                                                 | 0 (0)                                                              | 86 (100)                                                                 | 0 (0)                                                                 |                                                                                                      |
| <b>rs-fMRI</b>                      |          |                       |                                                                       |                                                                    |                                                                          |                                                                       |                                                                                                      |
| -                                   |          | Child                 | 170 (55.6)                                                            | 0 (0)                                                              | 136 (44.4)                                                               | 0 (0)                                                                 | Connectivity<br>None                                                                                 |
|                                     |          | Caregiver             | 0 (0)                                                                 | 0 (0)                                                              | 306 (100)                                                                | 0 (0)                                                                 |                                                                                                      |
|                                     |          | Concordant            | 0 (0)                                                                 | 0 (0)                                                              | 306 (100)                                                                | 0 (0)                                                                 |                                                                                                      |
| <b>Task-based fMRI</b>              |          |                       |                                                                       |                                                                    |                                                                          |                                                                       |                                                                                                      |
| <b>MID</b>                          |          |                       |                                                                       |                                                                    |                                                                          |                                                                       |                                                                                                      |
| <i>Reward anticipation</i>          |          | Child                 | 53 (31.7)                                                             | 0 (0)                                                              | 114 (68.3)                                                               | 0 (0)                                                                 | Activation<br>None                                                                                   |
|                                     |          | Caregiver             | 87 (52.1)                                                             | 0 (0)                                                              | 80 (47.9)                                                                | 0 (0)                                                                 |                                                                                                      |
|                                     |          | Concordant            | 0 (0)                                                                 | 0 (0)                                                              | 167 (100)                                                                | 0 (0)                                                                 |                                                                                                      |
| <i>Loss anticipation</i>            |          | Child                 | 120 (71.9)                                                            | 0 (0)                                                              | 47 (28.1)                                                                | 0 (0)                                                                 | None                                                                                                 |
|                                     |          | Caregiver             | 79 (47.3)                                                             | 0 (0)                                                              | 88 (52.7)                                                                | 0 (0)                                                                 |                                                                                                      |
|                                     |          | Concordant            | 0 (0)                                                                 | 0 (0)                                                              | 167 (100)                                                                | 0 (0)                                                                 |                                                                                                      |
| <i>Reward feedback</i>              |          | Child                 | 57 (34.1)                                                             | 0 (0)                                                              | 110 (65.9)                                                               | 0 (0)                                                                 | None                                                                                                 |
|                                     |          | Caregiver             | 116 (69.5)                                                            | 0 (0)                                                              | 51 (30.5)                                                                | 0 (0)                                                                 |                                                                                                      |
|                                     |          | Concordant            | 0 (0)                                                                 | 0 (0)                                                              | 167 (100)                                                                | 0 (0)                                                                 |                                                                                                      |
| <i>Loss feedback</i>                |          | Child                 | 126 (75.4)                                                            | 0 (0)                                                              | 41 (24.6)                                                                | 0 (0)                                                                 | None                                                                                                 |
|                                     |          | Caregiver             | 0 (0)                                                                 | 0 (0)                                                              | 167 (100)                                                                | 0 (0)                                                                 |                                                                                                      |
|                                     |          | Concordant            | 0 (0)                                                                 | 0 (0)                                                              | 167 (100)                                                                | 0 (0)                                                                 |                                                                                                      |
| <b>SST</b>                          |          |                       |                                                                       |                                                                    |                                                                          |                                                                       |                                                                                                      |
| <i>Incorrect stop vs correct go</i> |          | Child                 | 98 (58.7)                                                             | 0 (0)                                                              | 69 (41.3)                                                                | 0 (0)                                                                 | None                                                                                                 |
|                                     |          | Caregiver             | 0 (0)                                                                 | 0 (0)                                                              | 167 (100)                                                                | 0 (0)                                                                 |                                                                                                      |
|                                     |          | Concordant            | 0 (0)                                                                 | 0 (0)                                                              | 167 (100)                                                                | 0 (0)                                                                 |                                                                                                      |
| <i>Correct stop vs correct go</i>   |          | Child                 | 56 (33.5)                                                             | 0 (0)                                                              | 111 (66.5)                                                               | 0 (0)                                                                 | None                                                                                                 |
|                                     |          | Caregiver             | 0 (0)                                                                 | 0 (0)                                                              | 167 (100)                                                                | 0 (0)                                                                 |                                                                                                      |
|                                     |          | Concordant            | 0 (0)                                                                 | 0 (0)                                                              | 167 (100)                                                                | 0 (0)                                                                 |                                                                                                      |
| <b>EN-back</b>                      |          |                       |                                                                       |                                                                    |                                                                          |                                                                       |                                                                                                      |
| <i>2-back vs 0-back</i>             |          | Child                 | 0 (0)                                                                 | 0 (0)                                                              | 167 (100)                                                                | 0 (0)                                                                 | None                                                                                                 |
|                                     |          | Caregiver             | 0 (0)                                                                 | 0 (0)                                                              | 167 (100)                                                                | 0 (0)                                                                 |                                                                                                      |
|                                     |          | Concordant            | 0 (0)                                                                 | 0 (0)                                                              | 167 (100)                                                                | 0 (0)                                                                 |                                                                                                      |
| <i>Emotional vs neutral faces</i>   |          | Child                 | 74 (44.3)                                                             | 0 (0)                                                              | 93 (55.7)                                                                | 0 (0)                                                                 | None                                                                                                 |
|                                     |          | Caregiver             | 0 (0)                                                                 | 0 (0)                                                              | 167 (100)                                                                | 0 (0)                                                                 |                                                                                                      |
|                                     |          | Concordant            | 0 (0)                                                                 | 0 (0)                                                              | 167 (100)                                                                | 0 (0)                                                                 |                                                                                                      |

<sup>a</sup> Evidence of equivalence (Equivalence test,  $p_{FDR} < 0.05$ , 90% confidence interval (CI) does not overlap with bounds); No evidence of equivalence (Equivalence test,  $p_{FDR} \geq 0.05$ , 90%CI overlaps with bound/s); No different (Welch’s t-test,  $p_{FDR} < 0.05$ , 95%CI includes zero), Different (Welch’s t-test,  $p_{FDR} < 0.05$ , 95%CI does not include zero).

**eTable 4. Number and percentage of cortical regions found for each possible combined outcome of the Welch's t-test and the Equivalence test by imaging modality and suicidality group comparison – Uncorrected results <sup>a</sup>**

| Modality               | Contrast                            | Suicidality informant | Statistically equivalent and no statistically different, n (%) | Statistically equivalent and statistically different, n (%) | No statistically equivalent and no statistically different, n (%) | No statistically equivalent and statistically different, n (%) | Overlap of findings across groups that are not statistically equivalent and statistically different (uncorrected)                                  |
|------------------------|-------------------------------------|-----------------------|----------------------------------------------------------------|-------------------------------------------------------------|-------------------------------------------------------------------|----------------------------------------------------------------|----------------------------------------------------------------------------------------------------------------------------------------------------|
| <b>sMRI</b>            |                                     |                       |                                                                |                                                             |                                                                   |                                                                |                                                                                                                                                    |
| -                      |                                     | Child                 | 67 (77.9)                                                      | 0 (0)                                                       | 9 (10.5)                                                          | 10 (11.6)                                                      | Thickness<br>↓lingual gyrus (ch, co)                                                                                                               |
|                        |                                     | Caregiver             | 77 (89.5)                                                      | 0 (0)                                                       | 4 (4.7)                                                           | 5 (5.8)                                                        | ↓left bank of the superior temporal sulcus (ca, co)                                                                                                |
|                        |                                     | Concordant            | 9 (10.5)                                                       | 0 (0)                                                       | 72 (83.7)                                                         | 5 (5.8)                                                        | ↑medial orbitofrontal gyrus (ca, co)                                                                                                               |
| <b>rs-fMRI</b>         |                                     |                       |                                                                |                                                             |                                                                   |                                                                |                                                                                                                                                    |
| -                      |                                     | Child                 | 219 (71.6)                                                     | 0 (0)                                                       | 75 (24.5)                                                         | 12 (3.9)                                                       | Connectivity<br>↑Cingulo parietal – left hippocampus (ch, ca)                                                                                      |
|                        |                                     | Caregiver             | 162 (52.9)                                                     | 0 (0)                                                       | 118 (38.6)                                                        | 26 (8.5)                                                       | ↓Default – right hippocampus (ch, ca, co)                                                                                                          |
|                        |                                     | Concordant            | 0 (0)                                                          | 0 (0)                                                       | 294 (96.1)                                                        | 12 (3.9)                                                       | ↑Dorsal attention – left cerebellum (ca, co)<br>↓Salience – left amygdala (ch, co)<br>↓Salience – left accumbens area (ch, co)                     |
| <b>Task-based fMRI</b> |                                     |                       |                                                                |                                                             |                                                                   |                                                                |                                                                                                                                                    |
| <b>MID</b>             |                                     |                       |                                                                |                                                             |                                                                   |                                                                |                                                                                                                                                    |
|                        | <i>Reward anticipation</i>          | Child                 | 97 (58.1)                                                      | 0 (0)                                                       | 51 (30.5)                                                         | 19 (11.4)                                                      | Activation<br>↓ left cuneus gyrus (ch, co)                                                                                                         |
|                        |                                     | Caregiver             | 120 (71.9)                                                     | 0 (0)                                                       | 44 (26.3)                                                         | 3 (1.8)                                                        | ↓left temporal superior plan temporal gyrus (ch, co)                                                                                               |
|                        |                                     | Concordant            | 0 (0)                                                          | 0 (0)                                                       | 160 (95.8)                                                        | 7 (4.2)                                                        | ↓bilateral calcarine sulcus (ch, ca, co)<br>↓bilateral parieto-occipital sulcus (ch, co)<br>↓right occipito-temporal medial lingual gyrus (ch, co) |
|                        | <i>Loss anticipation</i>            | Child                 | 127 (76.0)                                                     | 0 (0)                                                       | 37 (22.2)                                                         | 3 (1.8)                                                        | ↓ left paracentral gyrus and sulcus (ca, co)                                                                                                       |
|                        |                                     | Caregiver             | 113 (67.7)                                                     | 0 (0)                                                       | 43 (25.7)                                                         | 11 (6.6)                                                       | ↓left temporal superior plan polar gyrus (ca, co)                                                                                                  |
|                        |                                     | Concordant            | 0 (0)                                                          | 0 (0)                                                       | 158 (94.6)                                                        | 9 (5.4)                                                        | ↓left temporal pole (ch, ca)<br>↓left central sulcus (ca, co)                                                                                      |
|                        | <i>Reward feedback</i>              | Child                 | 109 (65.3)                                                     | 0 (0)                                                       | 54 (32.3)                                                         | 4 (2.4)                                                        | ↓left middle posterior cingulate gyrus and sulcus (ch, co)                                                                                         |
|                        |                                     | Caregiver             | 108 (64.7)                                                     | 0 (0)                                                       | 52 (31.1)                                                         | 7 (4.2)                                                        | ↓left postcentral gyrus (ca, co)                                                                                                                   |
|                        |                                     | Concordant            | 0 (0)                                                          | 0 (0)                                                       | 134 (80.2)                                                        | 33 (19.8)                                                      | ↓bilateral central sulcus (ca, co)<br>↓bilateral superior circular insula sulcus (ca, co)<br>↓right subcentral gyrus and sulcus (ca, co)           |
|                        | <i>Loss feedback</i>                | Child                 | 136 (81.4)                                                     | 0 (0)                                                       | 30 (18.0)                                                         | 1 (0.6)                                                        |                                                                                                                                                    |
|                        |                                     | Caregiver             | 115 (68.9)                                                     | 0 (0)                                                       | 45 (26.9)                                                         | 7 (4.2)                                                        | None                                                                                                                                               |
|                        |                                     | Concordant            | 0 (0)                                                          | 0 (0)                                                       | 167 (100)                                                         | 0 (0)                                                          |                                                                                                                                                    |
| <b>SST</b>             |                                     |                       |                                                                |                                                             |                                                                   |                                                                |                                                                                                                                                    |
|                        | <i>Incorrect stop vs correct go</i> | Child                 | 127 (76.0)                                                     | 0 (0)                                                       | 36 (21.6)                                                         | 4 (2.4)                                                        |                                                                                                                                                    |
|                        |                                     | Caregiver             | 110 (65.9)                                                     | 0 (0)                                                       | 53 (31.7)                                                         | 4 (2.4)                                                        | ↓ right inferior temporal sulcus (ch, ca)                                                                                                          |
|                        |                                     | Concordant            | 0 (0)                                                          | 0 (0)                                                       | 167 (100)                                                         | 0 (0)                                                          |                                                                                                                                                    |
|                        | <i>Correct stop vs correct go</i>   | Child                 | 104 (62.3)                                                     | 0 (0)                                                       | 57 (34.1)                                                         | 6 (3.6)                                                        |                                                                                                                                                    |
|                        |                                     | Caregiver             | 95 (56.9)                                                      | 0 (0)                                                       | 64 (38.3)                                                         | 8 (4.8)                                                        | ↓ right inferior frontal orbital gyrus (ca, co)                                                                                                    |
|                        |                                     | Concordant            | 0 (0)                                                          | 0 (0)                                                       | 164 (98.2)                                                        | 3 (1.8)                                                        |                                                                                                                                                    |
| <b>EN-back</b>         |                                     |                       |                                                                |                                                             |                                                                   |                                                                |                                                                                                                                                    |
|                        | <i>2-back vs 0-back</i>             | Child                 | 105 (62.9)                                                     | 0 (0)                                                       | 57 (34.1)                                                         | 5 (3.0)                                                        | ↓ left transverse temporal sulcus (ch, co)                                                                                                         |
|                        |                                     | Caregiver             | 102 (61.2)                                                     | 0 (0)                                                       | 60 (35.9)                                                         | 5 (3.0)                                                        | ↓right lateral occipito-temporal sulcus (ca, co)                                                                                                   |
|                        |                                     | Concordant            | 0 (0)                                                          | 0 (0)                                                       | 161 (96.4)                                                        | 6 (3.6)                                                        |                                                                                                                                                    |
|                        | <i>Emotional</i>                    | Child                 | 110 (65.9)                                                     | 0 (0)                                                       | 54 (32.3)                                                         | 3 (1.8)                                                        | ↓bilateral circular insula sulcus (ch, co)                                                                                                         |

|                         |                      |                    |                |                         |                     |                                                  |
|-------------------------|----------------------|--------------------|----------------|-------------------------|---------------------|--------------------------------------------------|
| <i>vs neutral faces</i> | Caregiver Concordant | 94 (56.3)<br>0 (0) | 0 (0)<br>0 (0) | 64 (38.3)<br>155 (92.8) | 9 (5.4)<br>12 (7.2) | ↓right lateral occipito-temporal sulcus (ch, co) |
|-------------------------|----------------------|--------------------|----------------|-------------------------|---------------------|--------------------------------------------------|

<sup>a</sup>Evidence of equivalence (Equivalence test,  $p_{unc} < 0.05$ , 90% confidence interval (CI) does not overlap with bounds); No evidence of equivalence (Equivalence test,  $p_{unc} \geq 0.05$ , 90%CI overlaps with bound/s); No different (Welch's t-test,  $p_{unc} < 0.05$ , 95%CI includes zero), Different (Welch's t-test,  $p_{unc} < 0.05$ , 95%CI does not include zero). MID, Monetary incentive delay task. SST, Stop signal task. EN-back, Emotional n-back task. Ch, child-reported suicidality. Ca, caregiver-reported suicidality. Co, concordantly-reported suicidality.

### 3. Brain Structural Imaging

**eTable 5. Differences in cortical thickness and subcortical volumes between the never-suicidal group and the child-reported suicidality group: Welch's t-test**

| FreeSurfer Derived Regions           | Mean   | 95%CI          | t     | p (unc)      | p FDR |
|--------------------------------------|--------|----------------|-------|--------------|-------|
| <b>Cortical thickness</b>            |        |                |       |              |       |
| lh.Banks.of.Superior.Temporal.Sulcus | -0.010 | -0.022, 0.003  | -1.53 | 0.127        | 0.408 |
| lh.caudalanteriorcingulate           | 0.023  | 0.003, 0.042   | 2.30  | <b>0.022</b> | 0.222 |
| lh.caudalmiddlefrontal               | -0.005 | -0.014, 0.004  | -1.04 | 0.299        | 0.658 |
| lh.cuneus                            | -0.004 | -0.016, 0.008  | -0.60 | 0.549        | 0.777 |
| lh.entorhinal                        | -0.006 | -0.034, 0.022  | -0.45 | 0.656        | 0.811 |
| lh.fusiform                          | 0.005  | -0.004, 0.014  | 1.12  | 0.263        | 0.641 |
| lh.inferiorparietal                  | -0.004 | -0.011, 0.004  | -0.98 | 0.329        | 0.658 |
| lh.inferiortemporal                  | 0.000  | -0.01, 0.01    | 0.05  | 0.961        | 0.974 |
| lh.isthmuscingulate                  | 0.006  | -0.011, 0.022  | 0.70  | 0.486        | 0.752 |
| lh.lateraloccipital                  | -0.002 | -0.01, 0.006   | -0.42 | 0.676        | 0.814 |
| lh.lateralorbitofrontal              | -0.002 | -0.012, 0.007  | -0.49 | 0.625        | 0.804 |
| lh.lingual                           | -0.011 | -0.02, -0.002  | -2.33 | <b>0.020</b> | 0.222 |
| lh.medialorbitofrontal               | 0.015  | 0.002, 0.028   | 2.28  | <b>0.023</b> | 0.222 |
| lh.middletemporal                    | -0.005 | -0.017, 0.007  | -0.86 | 0.392        | 0.696 |
| lh.parahippocampal                   | -0.029 | -0.052, -0.006 | -2.48 | <b>0.013</b> | 0.222 |
| lh.paracentral                       | -0.007 | -0.017, 0.002  | -1.55 | 0.121        | 0.408 |
| lh.parsopercularis                   | 0.000  | -0.009, 0.01   | 0.07  | 0.946        | 0.974 |
| lh.parsorbitalis                     | 0.017  | 0.001, 0.032   | 2.15  | <b>0.032</b> | 0.272 |
| lh.parstriangularis                  | 0.001  | -0.01, 0.012   | 0.23  | 0.816        | 0.895 |
| lh.pericalcarine                     | -0.005 | -0.016, 0.006  | -0.92 | 0.357        | 0.693 |
| lh.postcentral                       | -0.002 | -0.012, 0.007  | -0.52 | 0.604        | 0.804 |
| lh.posteriorcingulate                | 0.012  | 0, 0.024       | 1.90  | 0.058        | 0.327 |
| lh.precentral                        | -0.008 | -0.016, 0      | -1.95 | 0.051        | 0.316 |
| lh.precuneus                         | -0.004 | -0.012, 0.003  | -1.12 | 0.264        | 0.641 |
| lh.rostralanteriorcingulate          | 0.013  | -0.003, 0.03   | 1.59  | 0.113        | 0.408 |
| lh.rostralmiddlefrontal              | 0.006  | -0.001, 0.014  | 1.63  | 0.103        | 0.408 |
| lh.superiorfrontal                   | 0.007  | -0.001, 0.015  | 1.71  | 0.088        | 0.408 |
| lh.superiorparietal                  | -0.004 | -0.011, 0.002  | -1.27 | 0.205        | 0.537 |
| lh.superiortemporal                  | -0.001 | -0.011, 0.009  | -0.10 | 0.918        | 0.974 |
| lh.supramarginal                     | -0.004 | -0.012, 0.004  | -0.90 | 0.369        | 0.696 |
| lh.frontalpole                       | 0.021  | -0.006, 0.047  | 1.54  | 0.124        | 0.408 |
| lh.temporalpole                      | -0.001 | -0.024, 0.022  | -0.08 | 0.932        | 0.974 |
| lh.transversetemporal                | -0.013 | -0.029, 0.003  | -1.64 | 0.101        | 0.408 |
| lh.insula                            | 0.005  | -0.005, 0.016  | 1.00  | 0.318        | 0.658 |

**eTable 5. Differences in cortical thickness and subcortical volumes between the never-suicidal group and the child-reported suicidality group: Welch's t-test**

| FreeSurfer Derived Regions           | Mean   | 95%CI          | t     | p (unc)      | p FDR |
|--------------------------------------|--------|----------------|-------|--------------|-------|
| rh.Banks.of.Superior.Temporal.Sulcus | 0.007  | -0.006, 0.02   | 1.02  | 0.308        | 0.658 |
| rh.caudalanteriorcingulate           | 0.017  | -0.003, 0.036  | 1.68  | 0.094        | 0.408 |
| rh.caudalmiddlefrontal               | 0.004  | -0.006, 0.014  | 0.80  | 0.423        | 0.719 |
| rh.cuneus                            | -0.005 | -0.016, 0.006  | -0.87 | 0.386        | 0.696 |
| rh.entorhinal                        | 0.008  | -0.024, 0.039  | 0.47  | 0.639        | 0.805 |
| rh.fusiform                          | -0.004 | -0.013, 0.004  | -0.99 | 0.321        | 0.658 |
| rh.inferiorparietal                  | 0.002  | -0.005, 0.009  | 0.54  | 0.592        | 0.804 |
| rh.inferiortemporal                  | -0.003 | -0.013, 0.006  | -0.65 | 0.514        | 0.752 |
| rh.isthmuscingulate                  | 0.016  | 0, 0.032       | 1.98  | <b>0.049</b> | 0.316 |
| rh.lateraloccipital                  | -0.006 | -0.015, 0.002  | -1.45 | 0.147        | 0.434 |
| rh.lateralorbitofrontal              | 0.007  | -0.004, 0.017  | 1.30  | 0.195        | 0.537 |
| rh.lingual                           | -0.003 | -0.012, 0.006  | -0.64 | 0.520        | 0.752 |
| rh.medialorbitofrontal               | 0.017  | 0.004, 0.03    | 2.50  | <b>0.013</b> | 0.222 |
| rh.middletemporal                    | 0.008  | -0.002, 0.018  | 1.51  | 0.132        | 0.408 |
| rh.parahippocampal                   | -0.025 | -0.046, -0.005 | -2.45 | <b>0.015</b> | 0.222 |
| rh.paracentral                       | -0.004 | -0.014, 0.006  | -0.84 | 0.399        | 0.696 |
| rh.parsopercularis                   | 0.008  | -0.002, 0.018  | 1.51  | 0.132        | 0.408 |
| rh.parsorbitalis                     | 0.016  | 0.001, 0.031   | 2.06  | <b>0.040</b> | 0.301 |
| rh.parstriangularis                  | 0.003  | -0.006, 0.013  | 0.67  | 0.503        | 0.752 |
| rh.pericalcarine                     | -0.002 | -0.013, 0.01   | -0.29 | 0.773        | 0.861 |
| rh.postcentral                       | -0.002 | -0.012, 0.008  | -0.39 | 0.694        | 0.814 |
| rh.posteriorcingulate                | 0.003  | -0.01, 0.015   | 0.41  | 0.683        | 0.814 |
| rh.precentral                        | -0.003 | -0.011, 0.005  | -0.74 | 0.460        | 0.752 |
| rh.precuneus                         | -0.002 | -0.01, 0.006   | -0.54 | 0.592        | 0.804 |
| rh.rostralanteriorcingulate          | 0.000  | -0.018, 0.019  | 0.05  | 0.959        | 0.974 |
| rh.rostralmiddlefrontal              | 0.005  | -0.004, 0.013  | 1.09  | 0.276        | 0.647 |
| rh.superiorfrontal                   | 0.010  | 0.001, 0.018   | 2.29  | <b>0.023</b> | 0.222 |
| rh.superiorparietal                  | -0.001 | -0.008, 0.006  | -0.29 | 0.772        | 0.861 |
| rh.superiortemporal                  | 0.003  | -0.006, 0.013  | 0.65  | 0.518        | 0.752 |
| rh.supramarginal                     | -0.001 | -0.01, 0.007   | -0.31 | 0.759        | 0.861 |
| rh.frontalpole                       | -0.016 | -0.041, 0.009  | -1.27 | 0.205        | 0.537 |
| rh.temporalpole                      | 0.006  | -0.019, 0.031  | 0.49  | 0.627        | 0.804 |
| rh.transversetemporal                | -0.005 | -0.021, 0.01   | -0.68 | 0.499        | 0.752 |
| rh.insula                            | 0.000  | -0.012, 0.012  | 0.03  | 0.974        | 0.974 |
| <b>Subcortical volumes</b>           |        |                |       |              |       |
| left.lateral.ventricle               | -56.5  | -274.1, 161.1  | -0.42 | 0.676        | 1.000 |
| left.cerebellum.cortex               | 218.3  | -168.6, 605.2  | 1.15  | 0.252        | 1.000 |
| left.thalamus.proper                 | 25.2   | -18.6, 68.9    | 1.04  | 0.299        | 1.000 |
| left.caudate                         | -5.8   | -45.5, 33.9    | -0.47 | 0.640        | 1.000 |
| left.putamen                         | -45.6  | -99.5, 8.3     | -1.74 | 0.082        | 1.000 |
| left.pallidum                        | -18.3  | -38, 1.3       | -2.04 | <b>0.042</b> | 1.000 |
| left.hippocampus                     | -17.7  | -49.8, 14.4    | -0.66 | 0.511        | 1.000 |
| left.amygdala                        | -11.3  | -27.7, 5.1     | -0.97 | 0.332        | 1.000 |



**eTable 5. Differences in cortical thickness and subcortical volumes between the never-suicidal group and the child-reported suicidality group: Welch's t-test**

| FreeSurfer Derived Regions | Mean  | 95%CI         | t     | p (unc) | p FDR |
|----------------------------|-------|---------------|-------|---------|-------|
| left.accumbens.area        | -0.2  | -8.8, 8.5     | -0.10 | 0.923   | 1.000 |
| right.lateral.ventricle    | -55.1 | -267.3, 157.1 | -0.37 | 0.710   | 1.000 |
| right.cerebellum.cortex    | 182.9 | -214.2, 580   | 1.03  | 0.302   | 1.000 |
| right.thalamus.proper      | 23.3  | -20.2, 66.9   | 0.78  | 0.437   | 1.000 |
| right.caudate              | -4.5  | -44.1, 35     | -0.62 | 0.535   | 1.000 |
| right.putamen              | -38.3 | -85, 8.3      | -1.79 | 0.075   | 1.000 |
| right.pallidum             | -3.1  | -18.9, 12.6   | -0.58 | 0.564   | 1.000 |
| right.hippocampus          | -6.8  | -36.9, 23.3   | -0.29 | 0.772   | 1.000 |
| right.amygdala             | -4.7  | -20.5, 11     | -0.20 | 0.843   | 1.000 |
| right.accumbens.area       | -0.4  | -8, 7.2       | -0.13 | 0.897   | 1.000 |

**Bold** denotes group differences at  $p < 0.05$  uncorrected

**eTable 6. Differences in cortical thickness and subcortical volumes between the never-suicidal group and the caregiver-reported suicidality group: Welch's t-test**

| FreeSurfer Derived Regions           | Mean   | 95%CI          | t     | p (unc)      | p FDR        |
|--------------------------------------|--------|----------------|-------|--------------|--------------|
| <b>Cortical thickness</b>            |        |                |       |              |              |
| lh.Banks.of.Superior.Temporal.Sulcus | -0.024 | -0.036, -0.011 | -3.66 | <b>0.000</b> | <b>0.019</b> |
| lh.caudalanteriorcingulate           | 0.013  | -0.008, 0.034  | 1.24  | 0.216        | 0.984        |
| lh.caudalmiddlefrontal               | -0.002 | -0.011, 0.007  | -0.43 | 0.666        | 0.984        |
| lh.cuneus                            | -0.001 | -0.012, 0.01   | -0.20 | 0.843        | 0.984        |
| lh.entorhinal                        | 0.009  | -0.02, 0.039   | 0.64  | 0.523        | 0.984        |
| lh.fusiform                          | 0.004  | -0.004, 0.012  | 1.01  | 0.311        | 0.984        |
| lh.inferiorparietal                  | -0.003 | -0.01, 0.004   | -0.77 | 0.441        | 0.984        |
| lh.inferiortemporal                  | 0.001  | -0.009, 0.011  | 0.18  | 0.854        | 0.984        |
| lh.isthmuscingulate                  | 0.003  | -0.013, 0.019  | 0.35  | 0.726        | 0.984        |
| lh.lateraloccipital                  | 0.002  | -0.007, 0.011  | 0.40  | 0.692        | 0.984        |
| lh.lateralorbitofrontal              | -0.005 | -0.015, 0.006  | -0.90 | 0.369        | 0.984        |
| lh.lingual                           | -0.003 | -0.013, 0.007  | -0.61 | 0.541        | 0.984        |
| lh.medialorbitofrontal               | 0.005  | -0.008, 0.018  | 0.71  | 0.477        | 0.984        |
| lh.middletemporal                    | -0.005 | -0.016, 0.007  | -0.76 | 0.447        | 0.984        |
| lh.parahippocampal                   | 0.005  | -0.019, 0.03   | 0.42  | 0.673        | 0.984        |
| lh.paracentral                       | -0.013 | -0.024, -0.002 | -2.37 | <b>0.018</b> | 0.616        |
| lh.parsopercularis                   | -0.004 | -0.014, 0.006  | -0.83 | 0.405        | 0.984        |
| lh.parsorbitalis                     | 0.006  | -0.011, 0.023  | 0.70  | 0.483        | 0.984        |
| lh.parsstriangularis                 | -0.001 | -0.012, 0.01   | -0.21 | 0.833        | 0.984        |
| lh.pericalcarine                     | -0.008 | -0.02, 0.004   | -1.37 | 0.172        | 0.984        |
| lh.postcentral                       | 0.005  | -0.004, 0.014  | 1.08  | 0.282        | 0.984        |
| lh.posteriorcingulate                | 0.000  | -0.013, 0.013  | 0.02  | 0.984        | 0.984        |
| lh.precentral                        | -0.003 | -0.011, 0.005  | -0.72 | 0.474        | 0.984        |

**eTable 6. Differences in cortical thickness and subcortical volumes between the never-suicidal group and the caregiver-reported suicidality group: Welch's t-test**

| FreeSurfer Derived Regions           | Mean   | 95%CI         | t     | p (unc)      | p FDR |
|--------------------------------------|--------|---------------|-------|--------------|-------|
| lh.precuneus                         | -0.004 | -0.012, 0.004 | -0.96 | 0.336        | 0.984 |
| lh.rostralanteriorcingulate          | 0.011  | -0.007, 0.028 | 1.21  | 0.228        | 0.984 |
| lh.rostralmiddlefrontal              | 0.003  | -0.005, 0.011 | 0.74  | 0.462        | 0.984 |
| lh.superiorfrontal                   | -0.001 | -0.009, 0.008 | -0.16 | 0.876        | 0.984 |
| lh.superiorparietal                  | 0.001  | -0.006, 0.008 | 0.36  | 0.719        | 0.984 |
| lh.superiortemporal                  | 0.001  | -0.01, 0.012  | 0.17  | 0.869        | 0.984 |
| lh.supramarginal                     | -0.003 | -0.012, 0.005 | -0.73 | 0.465        | 0.984 |
| lh.frontalpole                       | 0.007  | -0.021, 0.034 | 0.49  | 0.625        | 0.984 |
| lh.temporalpole                      | 0.012  | -0.012, 0.036 | 0.99  | 0.324        | 0.984 |
| lh.transversetemporal                | -0.010 | -0.026, 0.006 | -1.23 | 0.218        | 0.984 |
| lh.insula                            | 0.007  | -0.004, 0.019 | 1.31  | 0.191        | 0.984 |
| rh.Banks.of.Superior.Temporal.Sulcus | 0.000  | -0.014, 0.014 | 0.03  | 0.977        | 0.984 |
| rh.caudalanteriorcingulate           | -0.003 | -0.023, 0.017 | -0.28 | 0.782        | 0.984 |
| rh.caudalmiddlefrontal               | 0.004  | -0.005, 0.014 | 0.87  | 0.387        | 0.984 |
| rh.cuneus                            | 0.001  | -0.01, 0.012  | 0.11  | 0.913        | 0.984 |
| rh.entorhinal                        | 0.006  | -0.027, 0.038 | 0.35  | 0.727        | 0.984 |
| rh.fusiform                          | -0.002 | -0.01, 0.006  | -0.57 | 0.569        | 0.984 |
| rh.inferiorparietal                  | 0.005  | -0.003, 0.012 | 1.25  | 0.213        | 0.984 |
| rh.inferiortemporal                  | 0.001  | -0.009, 0.011 | 0.18  | 0.858        | 0.984 |
| rh.isthmuscingulate                  | 0.013  | -0.005, 0.031 | 1.44  | 0.149        | 0.984 |
| rh.lateraloccipital                  | 0.000  | -0.008, 0.009 | 0.10  | 0.917        | 0.984 |
| rh.lateralorbitofrontal              | 0.004  | -0.006, 0.015 | 0.82  | 0.410        | 0.984 |
| rh.lingual                           | -0.001 | -0.011, 0.009 | -0.23 | 0.815        | 0.984 |
| rh.medialorbitofrontal               | 0.009  | -0.005, 0.022 | 1.26  | 0.207        | 0.984 |
| rh.middletemporal                    | -0.002 | -0.013, 0.008 | -0.43 | 0.670        | 0.984 |
| rh.parahippocampal                   | -0.003 | -0.024, 0.018 | -0.26 | 0.794        | 0.984 |
| rh.paracentral                       | -0.009 | -0.019, 0.001 | -1.78 | 0.076        | 0.984 |
| rh.parsopercularis                   | 0.000  | -0.011, 0.01  | -0.06 | 0.956        | 0.984 |
| rh.parsorbitalis                     | 0.011  | -0.005, 0.027 | 1.38  | 0.168        | 0.984 |
| rh.parstriangularis                  | -0.001 | -0.011, 0.01  | -0.10 | 0.920        | 0.984 |
| rh.pericalcarine                     | -0.005 | -0.017, 0.007 | -0.88 | 0.380        | 0.984 |
| rh.postcentral                       | 0.002  | -0.009, 0.013 | 0.42  | 0.677        | 0.984 |
| rh.posteriorcingulate                | 0.000  | -0.013, 0.012 | -0.06 | 0.949        | 0.984 |
| rh.precentral                        | -0.002 | -0.011, 0.006 | -0.50 | 0.615        | 0.984 |
| rh.precuneus                         | 0.000  | -0.008, 0.008 | -0.11 | 0.909        | 0.984 |
| rh.rostralanteriorcingulate          | 0.001  | -0.017, 0.02  | 0.14  | 0.885        | 0.984 |
| rh.rostralmiddlefrontal              | 0.005  | -0.004, 0.013 | 1.08  | 0.280        | 0.984 |
| rh.superiorfrontal                   | 0.002  | -0.006, 0.011 | 0.57  | 0.572        | 0.984 |
| rh.superiorparietal                  | 0.001  | -0.006, 0.009 | 0.40  | 0.691        | 0.984 |
| rh.superiortemporal                  | 0.007  | -0.003, 0.017 | 1.37  | 0.172        | 0.984 |
| rh.supramarginal                     | -0.004 | -0.013, 0.006 | -0.76 | 0.450        | 0.984 |
| rh.frontalpole                       | -0.003 | -0.031, 0.024 | -0.22 | 0.827        | 0.984 |
| rh.temporalpole                      | 0.028  | 0.003, 0.053  | 2.20  | <b>0.028</b> | 0.638 |

**eTable 6. Differences in cortical thickness and subcortical volumes between the never-suicidal group and the caregiver-reported suicidality group: Welch's t-test**

| FreeSurfer Derived Regions | Mean   | 95%CI         | t     | p (unc)      | p FDR |
|----------------------------|--------|---------------|-------|--------------|-------|
| rh.transversetemporal      | 0.000  | -0.016, 0.016 | 0.05  | 0.957        | 0.984 |
| rh.insula                  | 0.008  | -0.005, 0.021 | 1.25  | 0.210        | 0.984 |
| <b>Subcortical volumes</b> |        |               |       |              |       |
| left.lateral.ventricle     | 69.0   | -161.9, 300   | 0.59  | 0.557        | 0.836 |
| left.cerebellum.cortex     | -278.8 | -660.8, 103.1 | -1.43 | 0.152        | 0.547 |
| left.thalamus.proper       | -45.8  | -90, -1.6     | -2.03 | <b>0.042</b> | 0.417 |
| left.caudate               | -6.0   | -45.1, 33.1   | -0.30 | 0.764        | 0.879 |
| left.putamen               | 0.0    | -55.6, 55.6   | 0.00  | 1.000        | 1.000 |
| left.pallidum              | -12.6  | -33.3, 8.1    | -1.20 | 0.231        | 0.594 |
| left.hippocampus           | -28.2  | -60.9, 4.5    | -1.69 | 0.091        | 0.546 |
| left.amygdala              | -5.5   | -22.1, 11     | -0.66 | 0.510        | 0.836 |
| left.accumbens.area        | 3.1    | -5.5, 11.7    | 0.71  | 0.478        | 0.836 |
| right.lateral.ventricle    | 42.6   | -196.5, 281.7 | 0.35  | 0.726        | 0.879 |
| right.cerebellum.cortex    | -252.0 | -654.6, 150.5 | -1.23 | 0.219        | 0.594 |
| right.thalamus.proper      | -35.1  | -80.4, 10.3   | -1.52 | 0.129        | 0.547 |
| right.caudate              | -9.7   | -49.4, 30.1   | -0.48 | 0.633        | 0.876 |
| right.putamen              | 1.9    | -45.3, 49     | 0.08  | 0.938        | 0.993 |
| right.pallidum             | -2.3   | -18.2, 13.7   | -0.28 | 0.781        | 0.879 |
| right.hippocampus          | -32.4  | -64.3, -0.5   | -2.00 | <b>0.046</b> | 0.417 |
| right.amygdala             | -5.3   | -21.7, 11.1   | -0.63 | 0.526        | 0.836 |
| right.accumbens.area       | -3.1   | -11, 4.8      | -0.77 | 0.441        | 0.836 |

**Bold** denotes group differences at p<0.05 uncorrected and corrected

**eTable 7. Differences in cortical thickness and subcortical volumes between the never-suicidal group and the concordantly-reported suicidality group: Welch's t-test**

| FreeSurfer Derived Regions           | Mean   | 95%CI          | t     | p (unc)      | p FDR |
|--------------------------------------|--------|----------------|-------|--------------|-------|
| <b>Cortical thickness</b>            |        |                |       |              |       |
| lh.Banks.of.Superior.Temporal.Sulcus | -0.033 | -0.055, -0.01  | -2.84 | <b>0.005</b> | 0.181 |
| lh.caudalanteriorcingulate           | 0.035  | -0.003, 0.073  | 1.82  | 0.071        | 0.606 |
| lh.caudalmiddlefrontal               | -0.006 | -0.021, 0.009  | -0.79 | 0.428        | 0.823 |
| lh.cuneus                            | -0.003 | -0.023, 0.017  | -0.31 | 0.759        | 0.886 |
| lh.entorhinal                        | 0.015  | -0.035, 0.065  | 0.59  | 0.557        | 0.838 |
| lh.fusiform                          | 0.005  | -0.01, 0.02    | 0.66  | 0.510        | 0.838 |
| lh.inferiorparietal                  | -0.005 | -0.018, 0.008  | -0.76 | 0.448        | 0.823 |
| lh.inferiortemporal                  | 0.000  | -0.019, 0.019  | 0.01  | 0.993        | 0.993 |
| lh.isthmuscingulate                  | -0.018 | -0.046, 0.009  | -1.32 | 0.190        | 0.806 |
| lh.lateraloccipital                  | -0.006 | -0.021, 0.009  | -0.82 | 0.411        | 0.823 |
| lh.lateralorbitofrontal              | 0.005  | -0.013, 0.023  | 0.57  | 0.567        | 0.838 |
| lh.lingual                           | -0.021 | -0.037, -0.004 | -2.49 | <b>0.014</b> | 0.310 |

**eTable 7. Differences in cortical thickness and subcortical volumes between the never-suicidal group and the concordantly-reported suicidality group: Welch's t-test**

| FreeSurfer Derived Regions           | Mean   | 95%CI         | t     | p (unc)      | p FDR |
|--------------------------------------|--------|---------------|-------|--------------|-------|
| lh.medialorbitofrontal               | 0.019  | -0.003, 0.041 | 1.73  | 0.086        | 0.629 |
| lh.middletemporal                    | -0.009 | -0.029, 0.011 | -0.89 | 0.374        | 0.823 |
| lh.parahippocampal                   | -0.009 | -0.051, 0.032 | -0.45 | 0.654        | 0.855 |
| lh.paracentral                       | -0.016 | -0.034, 0.003 | -1.69 | 0.093        | 0.629 |
| lh.parsopercularis                   | -0.007 | -0.024, 0.01  | -0.80 | 0.427        | 0.823 |
| lh.parsorbitalis                     | 0.028  | -0.002, 0.059 | 1.83  | 0.069        | 0.606 |
| lh.parstriangularis                  | -0.007 | -0.027, 0.012 | -0.75 | 0.452        | 0.823 |
| lh.pericalcarine                     | -0.011 | -0.032, 0.011 | -0.97 | 0.332        | 0.806 |
| lh.postcentral                       | -0.007 | -0.022, 0.009 | -0.87 | 0.384        | 0.823 |
| lh.posteriorcingulate                | 0.000  | -0.02, 0.019  | -0.02 | 0.983        | 0.993 |
| lh.precentral                        | 0.002  | -0.011, 0.015 | 0.29  | 0.769        | 0.886 |
| lh.precuneus                         | -0.006 | -0.019, 0.007 | -0.87 | 0.388        | 0.823 |
| lh.rostralanteriorcingulate          | 0.001  | -0.03, 0.032  | 0.09  | 0.930        | 0.973 |
| lh.rostralmiddlefrontal              | 0.010  | -0.004, 0.023 | 1.40  | 0.163        | 0.806 |
| lh.superiorfrontal                   | 0.001  | -0.014, 0.015 | 0.10  | 0.922        | 0.973 |
| lh.superiorparietal                  | -0.001 | -0.013, 0.011 | -0.11 | 0.915        | 0.973 |
| lh.superiortemporal                  | -0.004 | -0.023, 0.016 | -0.38 | 0.702        | 0.884 |
| lh.supramarginal                     | 0.001  | -0.012, 0.015 | 0.22  | 0.823        | 0.933 |
| lh.frontalpole                       | 0.029  | -0.018, 0.077 | 1.24  | 0.218        | 0.806 |
| lh.temporalpole                      | 0.039  | 0.001, 0.078  | 2.02  | <b>0.045</b> | 0.606 |
| lh.transversetemporal                | -0.013 | -0.042, 0.016 | -0.86 | 0.390        | 0.823 |
| lh.insula                            | 0.007  | -0.012, 0.026 | 0.72  | 0.472        | 0.823 |
| rh.Banks.of.Superior.Temporal.Sulcus | 0.014  | -0.008, 0.036 | 1.22  | 0.223        | 0.806 |
| rh.caudalanteriorcingulate           | 0.013  | -0.022, 0.049 | 0.74  | 0.463        | 0.823 |
| rh.caudalmiddlefrontal               | 0.005  | -0.011, 0.022 | 0.62  | 0.534        | 0.838 |
| rh.cuneus                            | -0.010 | -0.028, 0.008 | -1.10 | 0.275        | 0.806 |
| rh.entorhinal                        | 0.031  | -0.029, 0.09  | 1.02  | 0.307        | 0.806 |
| rh.fusiform                          | 0.004  | -0.011, 0.018 | 0.49  | 0.626        | 0.851 |
| rh.inferiorparietal                  | 0.010  | -0.002, 0.023 | 1.63  | 0.106        | 0.654 |
| rh.inferiortemporal                  | -0.004 | -0.021, 0.012 | -0.51 | 0.610        | 0.851 |
| rh.isthmuscingulate                  | 0.001  | -0.028, 0.03  | 0.06  | 0.953        | 0.982 |
| rh.lateraloccipital                  | -0.008 | -0.024, 0.007 | -1.06 | 0.293        | 0.806 |
| rh.lateralorbitofrontal              | 0.017  | 0.002, 0.033  | 2.25  | <b>0.026</b> | 0.436 |
| rh.lingual                           | -0.010 | -0.027, 0.007 | -1.18 | 0.240        | 0.806 |
| rh.medialorbitofrontal               | 0.034  | 0.01, 0.057   | 2.83  | <b>0.005</b> | 0.181 |
| rh.middletemporal                    | 0.011  | -0.008, 0.03  | 1.13  | 0.259        | 0.806 |
| rh.parahippocampal                   | -0.006 | -0.044, 0.031 | -0.34 | 0.733        | 0.886 |
| rh.paracentral                       | -0.019 | -0.039, 0.001 | -1.92 | 0.057        | 0.606 |
| rh.parsopercularis                   | 0.005  | -0.013, 0.022 | 0.50  | 0.616        | 0.851 |
| rh.parsorbitalis                     | 0.013  | -0.013, 0.039 | 1.01  | 0.314        | 0.806 |
| rh.parstriangularis                  | 0.003  | -0.014, 0.02  | 0.39  | 0.697        | 0.884 |
| rh.pericalcarine                     | -0.005 | -0.027, 0.016 | -0.51 | 0.614        | 0.851 |

**eTable 7. Differences in cortical thickness and subcortical volumes between the never-suicidal group and the concordantly-reported suicidality group: Welch's t-test**

| <b>FreeSurfer Derived Regions</b>                               | <b>Mean</b> | <b>95%CI</b>  | <b>t</b> | <b>p (unc)</b> | <b>p FDR</b> |
|-----------------------------------------------------------------|-------------|---------------|----------|----------------|--------------|
| rh.postcentral                                                  | -0.003      | -0.019, 0.014 | -0.35    | 0.725          | 0.886        |
| rh.posteriorcingulate                                           | 0.002       | -0.019, 0.023 | 0.18     | 0.854          | 0.952        |
| rh.precentral                                                   | 0.004       | -0.01, 0.019  | 0.62     | 0.537          | 0.838        |
| rh.precuneus                                                    | -0.004      | -0.018, 0.009 | -0.60    | 0.547          | 0.838        |
| rh.rostralanteriorcingulate                                     | -0.005      | -0.039, 0.029 | -0.30    | 0.767          | 0.886        |
| rh.rostralmiddlefrontal                                         | 0.001       | -0.012, 0.015 | 0.15     | 0.879          | 0.965        |
| rh.superiorfrontal                                              | 0.007       | -0.006, 0.021 | 1.06     | 0.291          | 0.806        |
| rh.superiorparietal                                             | 0.007       | -0.006, 0.02  | 1.14     | 0.257          | 0.806        |
| rh.superiortemporal                                             | 0.011       | -0.006, 0.028 | 1.29     | 0.198          | 0.806        |
| rh.supramarginal                                                | -0.005      | -0.022, 0.011 | -0.63    | 0.527          | 0.838        |
| rh.frontalpole                                                  | -0.021      | -0.063, 0.02  | -1.00    | 0.317          | 0.806        |
| rh.temporalpole                                                 | 0.030       | -0.016, 0.076 | 1.27     | 0.206          | 0.806        |
| rh.transversetemporal                                           | -0.014      | -0.041, 0.014 | -0.98    | 0.329          | 0.806        |
| rh.insula                                                       | 0.006       | -0.018, 0.029 | 0.46     | 0.645          | 0.855        |
| <b>Subcortical volumes</b>                                      |             |               |          |                |              |
| left.lateral.ventricle                                          | -112.3      | -468.6, 244.1 | -0.62    | 0.535          | 0.959        |
| left.cerebellum.cortex                                          | -65.1       | -713.2, 583.1 | -0.20    | 0.843          | 0.959        |
| left.thalamus.proper                                            | 19.4        | -57.8, 96.5   | 0.50     | 0.621          | 0.959        |
| left.caudate                                                    | 21.3        | -47.6, 90.3   | 0.61     | 0.542          | 0.959        |
| left.putamen                                                    | 14.1        | -84, 112.2    | 0.28     | 0.777          | 0.959        |
| left.pallidum                                                   | -30.5       | -62.3, 1.4    | -1.89    | 0.061          | 0.959        |
| left.hippocampus                                                | -30.8       | -85.3, 23.7   | -1.12    | 0.266          | 0.959        |
| left.amygdala                                                   | -1.9        | -32.9, 29.1   | -0.12    | 0.906          | 0.959        |
| left.accumbens.area                                             | 6.7         | -8.7, 22.1    | 0.86     | 0.390          | 0.959        |
| right.lateral.ventricle                                         | -151.8      | -485, 181.4   | -0.90    | 0.369          | 0.959        |
| right.cerebellum.cortex                                         | -7.8        | -682.4, 666.9 | -0.02    | 0.982          | 0.982        |
| right.thalamus.proper                                           | 22.9        | -56, 101.8    | 0.57     | 0.567          | 0.959        |
| right.caudate                                                   | 18.9        | -48.3, 86.2   | 0.56     | 0.579          | 0.959        |
| right.putamen                                                   | 12.5        | -74.3, 99.3   | 0.28     | 0.776          | 0.959        |
| right.pallidum                                                  | 1.9         | -28.8, 32.5   | 0.12     | 0.903          | 0.959        |
| right.hippocampus                                               | 10.6        | -42.6, 63.8   | 0.39     | 0.695          | 0.959        |
| right.amygdala                                                  | 3.4         | -25.8, 32.6   | 0.23     | 0.819          | 0.959        |
| right.accumbens.area                                            | 2.2         | -10.8, 15.2   | 0.33     | 0.740          | 0.959        |
| <b>Bold</b> denotes group differences at $p < 0.05$ uncorrected |             |               |          |                |              |

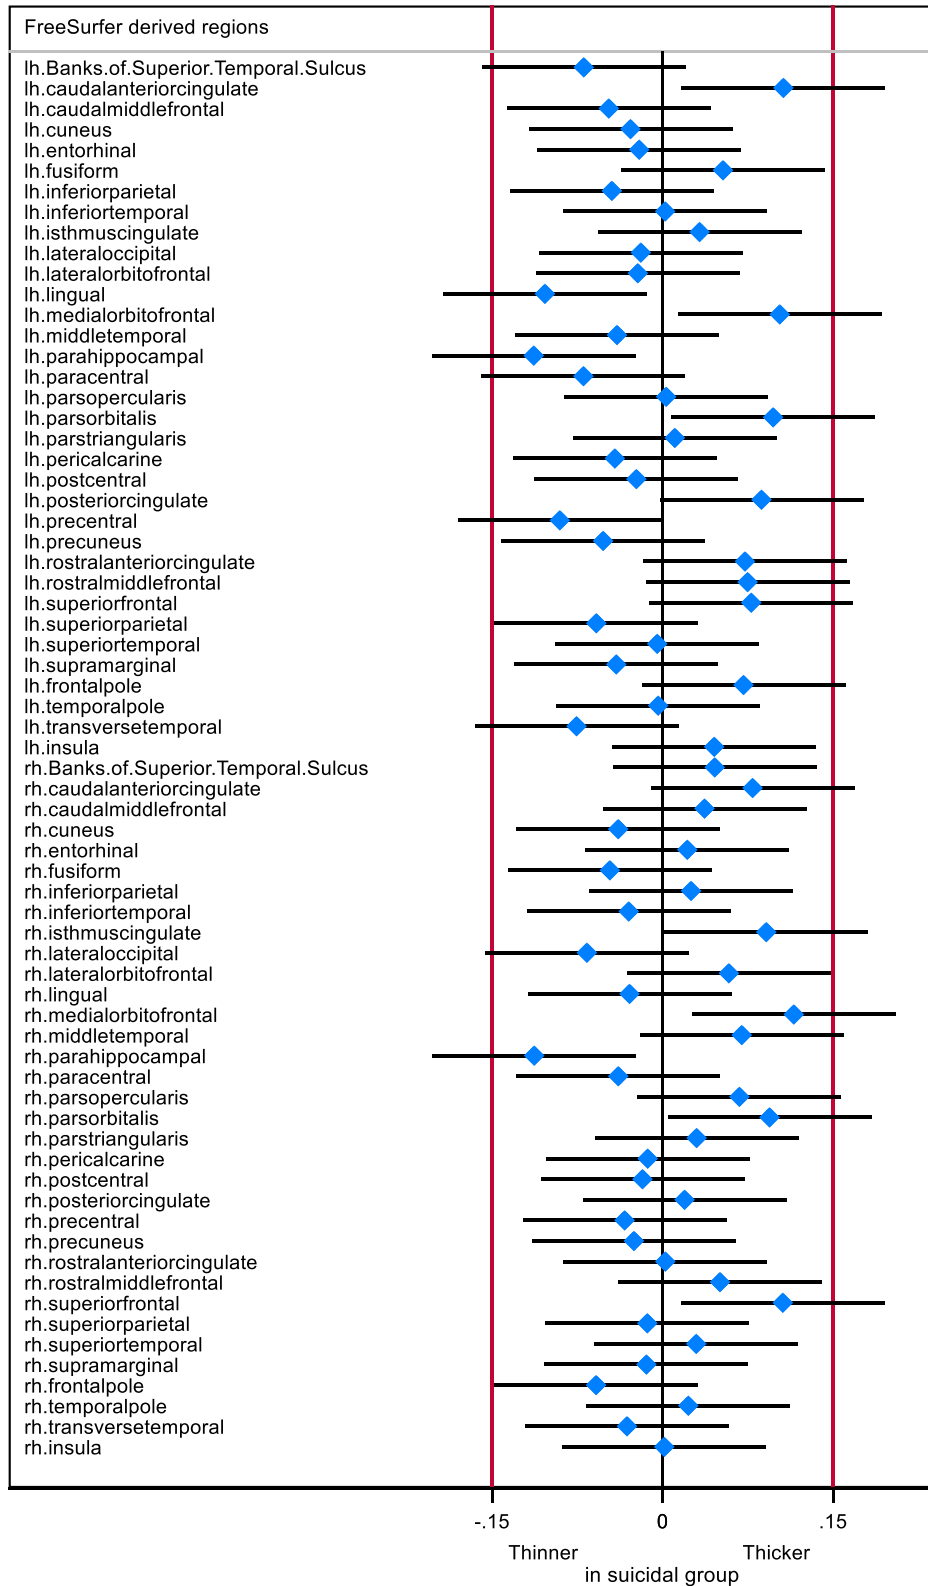

**eFigure 2.** Results of the Equivalence test for differences in cortical thickness between the never-suicidal group and the child-reported suicidality group. The figure shows the effect sizes and 95% confidence intervals of the difference against the interval of equivalence (-0.15 to 0.15).

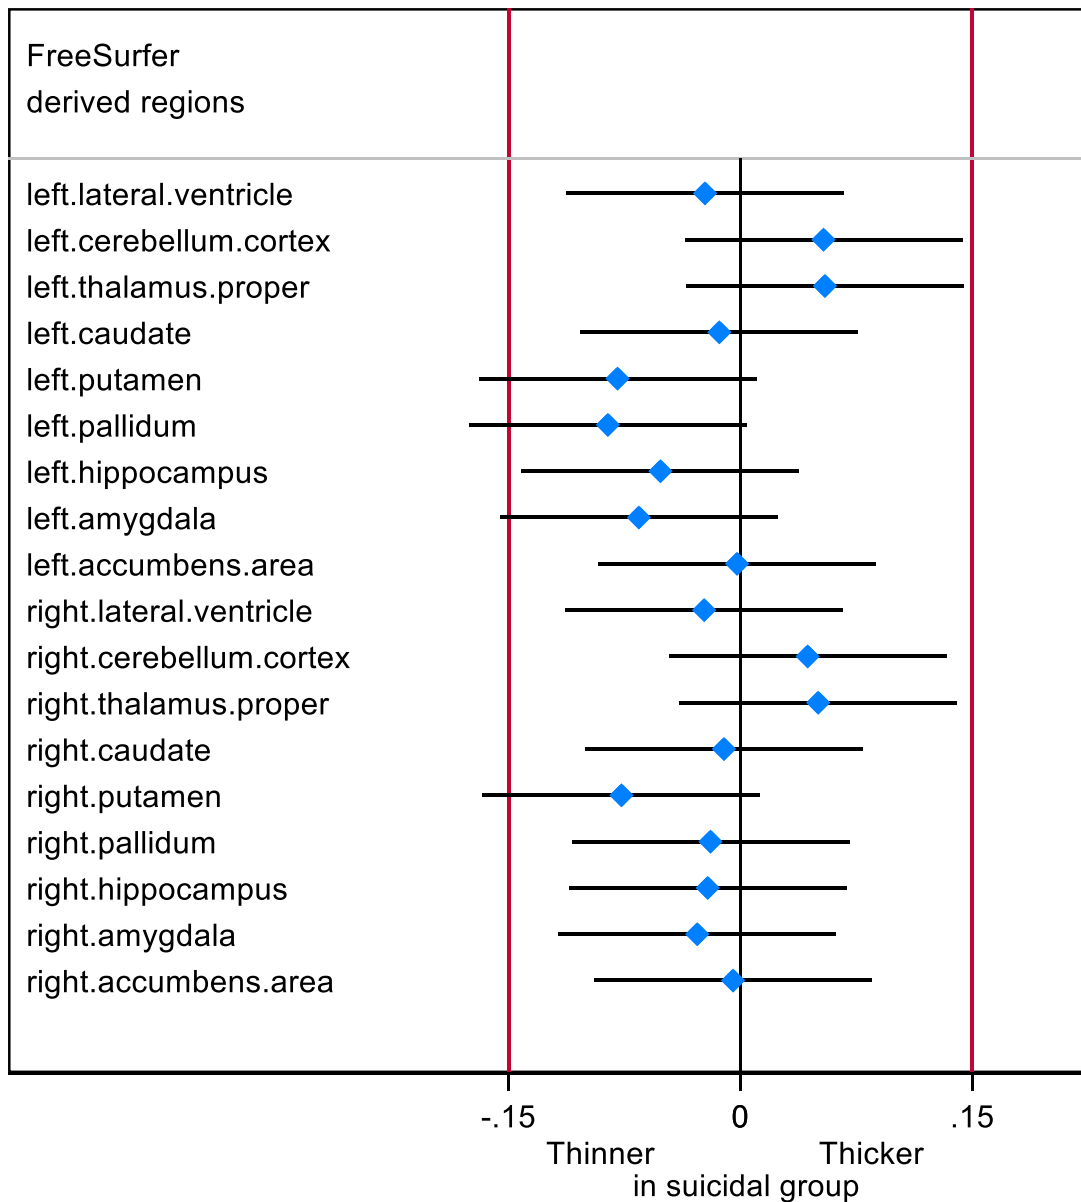

**eFigure 3.** Results of the Equivalence test for differences in subcortical volumes between the never-suicidal group and the child-reported suicidality group. The figure shows the effect sizes and 95% confidence intervals of the difference against the interval of equivalence (-0.15 to 0.15).

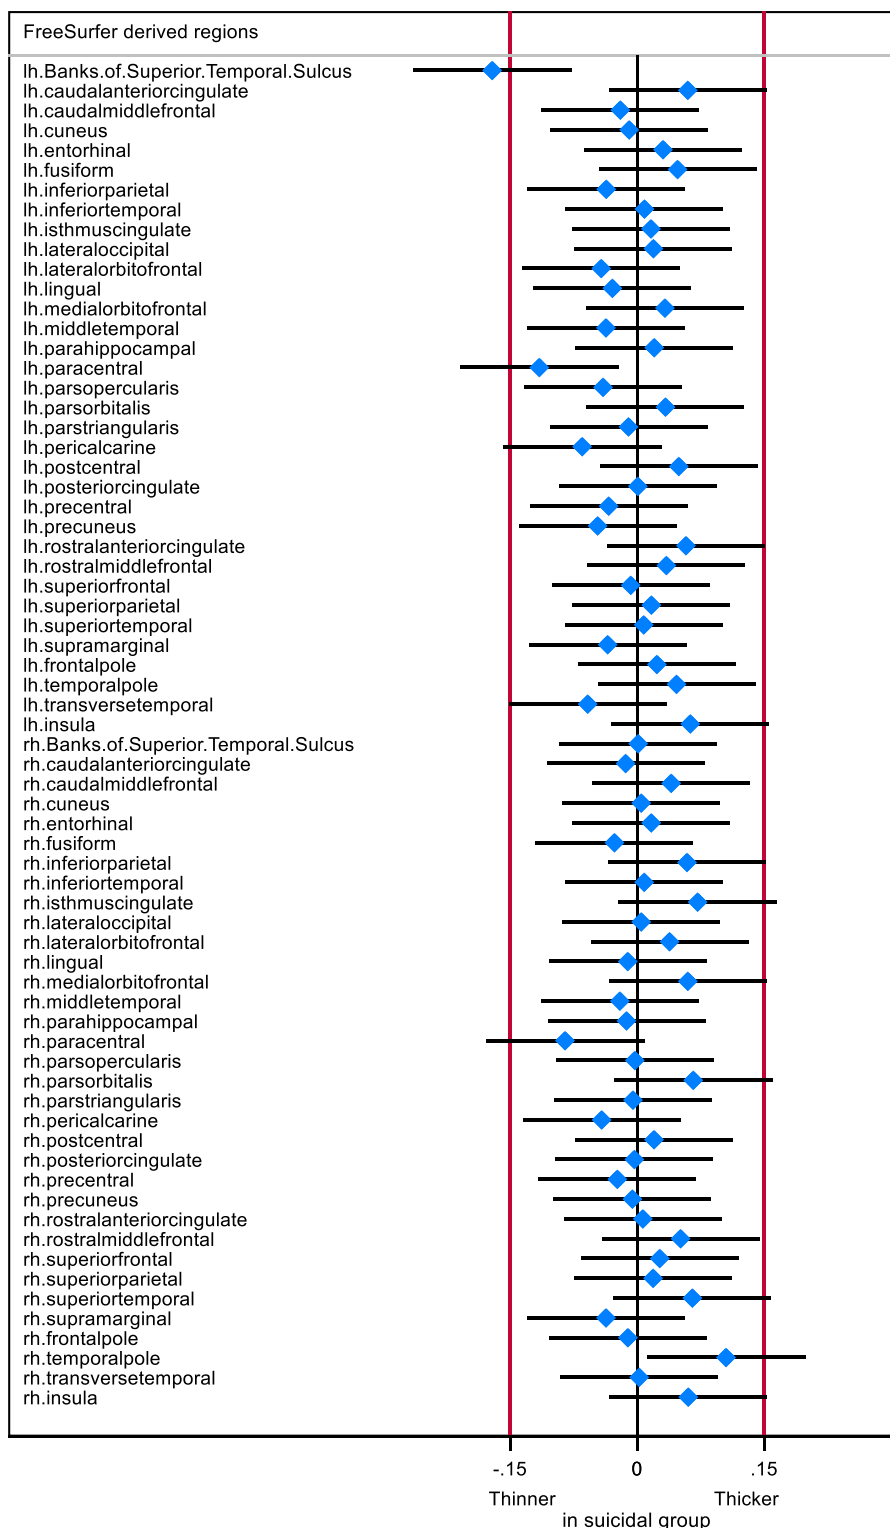

**eFigure 4.** Results of the Equivalence test for differences in cortical thickness between the never-suicidal group and the caregiver-reported suicidality group. The figure shows the effect sizes and 95% confidence intervals of the difference against the interval of equivalence (-0.15 to 0.15).



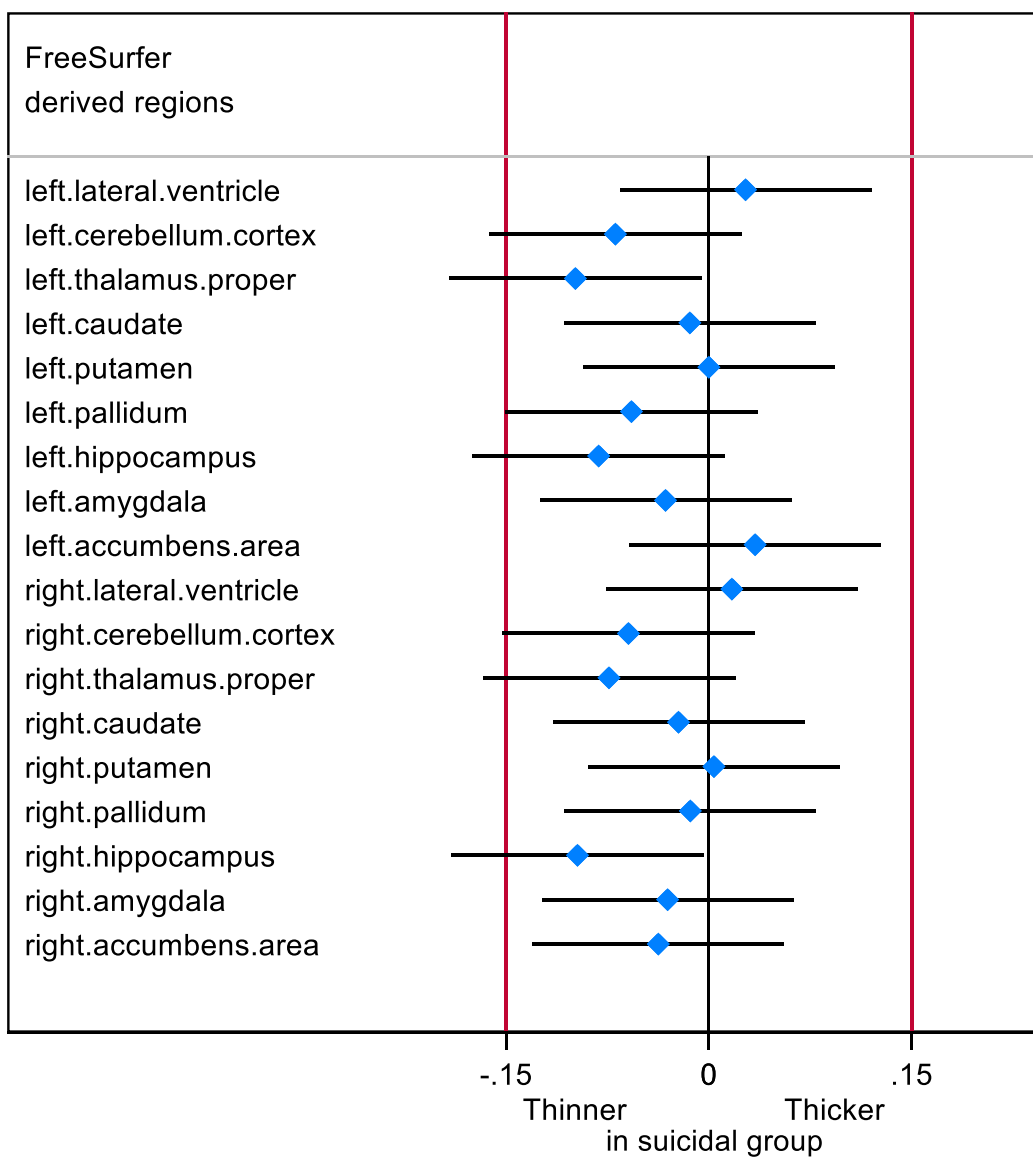

**eFigure 5.** Results of the Equivalence test for differences in subcortical volumes between the never-suicidal group and the caregiver-reported suicidality group. The figure shows the effect sizes and 95% confidence intervals of the difference against the interval of equivalence (-0.15 to 0.15).

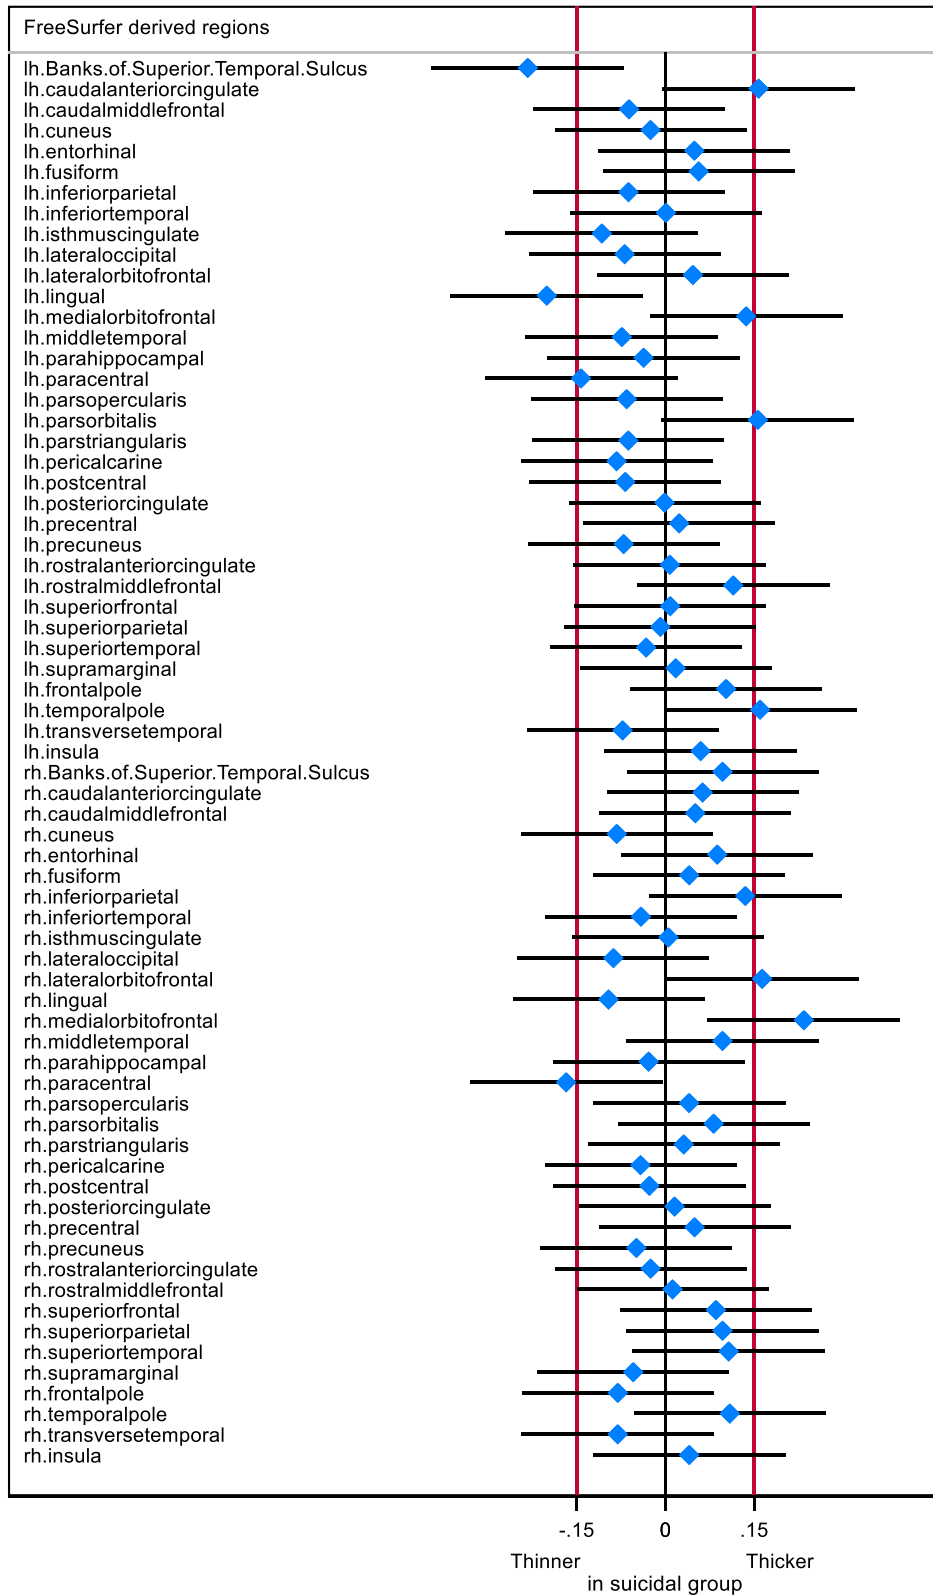

**eFigure 6.** Results of the Equivalence test for differences in cortical thickness between the never-suicidal group and the concordantly-reported suicidality group. The figure shows the effect sizes and 95% confidence intervals of the difference against the interval of equivalence (-0.15 to 0.15).

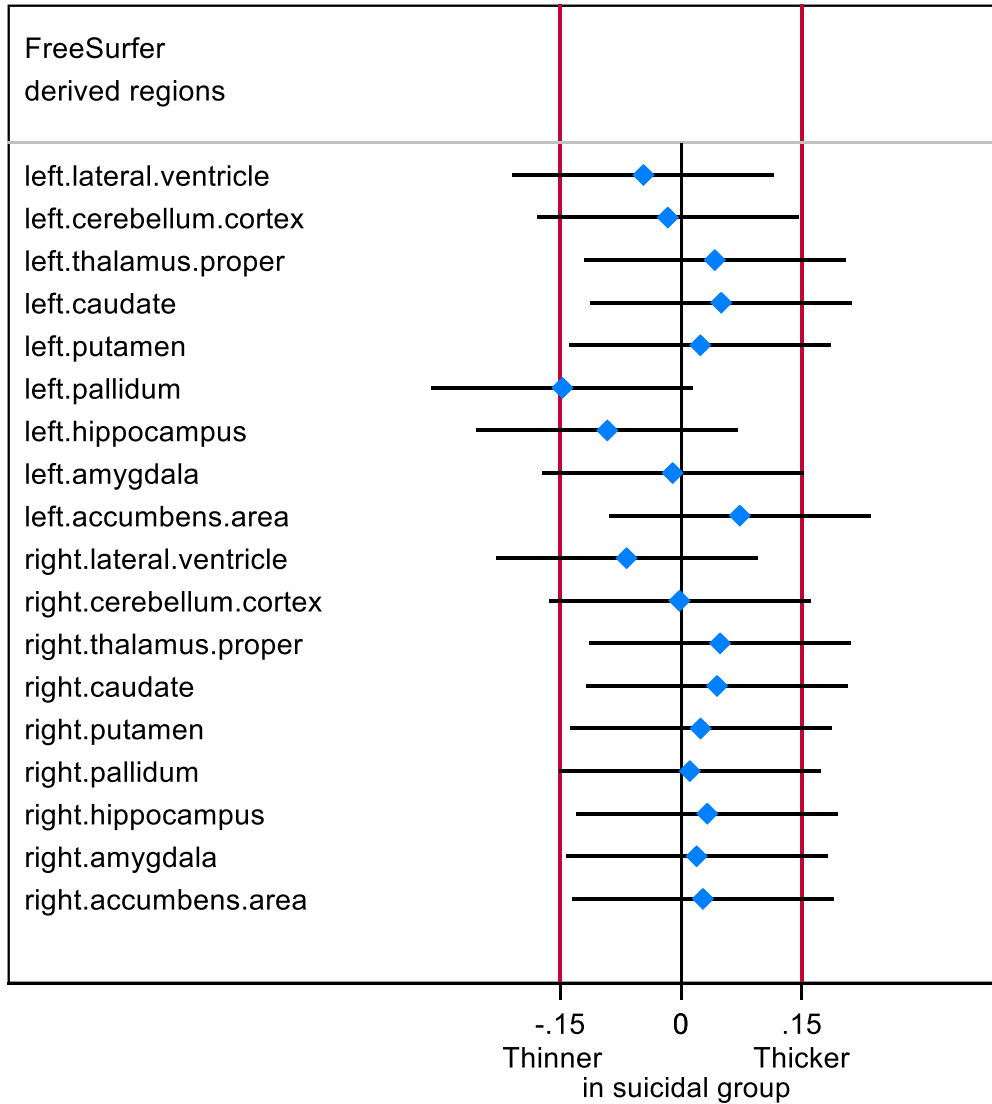

**eFigure 7.** Results of the Equivalence test for differences in subcortical volumes between the never-suicidal group and the concordantly-reported suicidality group. The figure shows the effect sizes and 95% confidence intervals of the difference against the interval of equivalence (-0.15 to 0.15).

#### 4. Resting -State Functional Imaging

**eTable 8. Differences in functional connectivity between the never-suicidal group and the child-reported suicidality group: Welch's t-test**

| rs-fMRI indices                       | Mean   | 95%CI         | t     | p (unc) | p FDR |
|---------------------------------------|--------|---------------|-------|---------|-------|
| AuditoryLeftCerebellumCortex          | 0.008  | -0.005, 0.022 | 1.24  | 0.215   | 0.998 |
| AuditoryLeftThalamusProper            | 0.008  | -0.004, 0.02  | 1.37  | 0.171   | 0.998 |
| AuditoryLeftCaudate                   | -0.012 | -0.028, 0.005 | -1.35 | 0.179   | 0.998 |
| AuditoryLeftPutamen                   | -0.002 | -0.013, 0.01  | -0.26 | 0.793   | 0.998 |
| AuditoryLeftPallidum                  | -0.002 | -0.011, 0.008 | -0.33 | 0.743   | 0.998 |
| AuditoryBrainStem                     | 0.000  | -0.012, 0.012 | 0.00  | 0.997   | 0.998 |
| AuditoryLeftHippocampus               | 0.001  | -0.006, 0.007 | 0.13  | 0.894   | 0.998 |
| AuditoryLeftAmygdala                  | -0.008 | -0.023, 0.006 | -1.14 | 0.254   | 0.998 |
| AuditoryLeftAccumbensArea             | 0.002  | -0.01, 0.014  | 0.27  | 0.791   | 0.998 |
| AuditoryLeftVentraldc                 | -0.002 | -0.02, 0.017  | -0.16 | 0.870   | 0.998 |
| AuditoryRightCerebellumCortex         | 0.003  | -0.015, 0.02  | 0.30  | 0.763   | 0.998 |
| AuditoryRightThalamusProper           | 0.008  | -0.003, 0.019 | 1.49  | 0.138   | 0.998 |
| AuditoryRightCaudate                  | -0.010 | -0.025, 0.004 | -1.40 | 0.162   | 0.998 |
| AuditoryRightPutamen                  | -0.006 | -0.02, 0.008  | -0.82 | 0.412   | 0.998 |
| AuditoryRightPallidum                 | -0.006 | -0.018, 0.005 | -1.07 | 0.286   | 0.998 |
| AuditoryRightHippocampus              | 0.008  | -0.01, 0.025  | 0.85  | 0.396   | 0.998 |
| AuditoryRightAmygdala                 | 0.007  | -0.003, 0.017 | 1.40  | 0.163   | 0.998 |
| AuditoryRightAccumbensArea            | -0.004 | -0.014, 0.006 | -0.81 | 0.421   | 0.998 |
| AuditoryRightVentraldc                | 0.001  | -0.009, 0.01  | 0.13  | 0.900   | 0.998 |
| CinguloOpercularLeftCerebellumCortex  | 0.001  | -0.005, 0.008 | 0.44  | 0.662   | 0.998 |
| CinguloOpercularLeftThalamusProper    | -0.001 | -0.016, 0.014 | -0.15 | 0.879   | 0.998 |
| CinguloOpercularLeftCaudate           | -0.003 | -0.016, 0.011 | -0.37 | 0.709   | 0.998 |
| CinguloOpercularLeftPutamen           | 0.006  | -0.013, 0.024 | 0.60  | 0.550   | 0.998 |
| CinguloOpercularLeftPallidum          | -0.003 | -0.018, 0.013 | -0.34 | 0.733   | 0.998 |
| CinguloOpercularBrainStem             | 0.005  | -0.007, 0.016 | 0.80  | 0.425   | 0.998 |
| CinguloOpercularLeftHippocampus       | -0.005 | -0.017, 0.008 | -0.72 | 0.474   | 0.998 |
| CinguloOpercularLeftAmygdala          | 0.006  | -0.007, 0.019 | 0.96  | 0.336   | 0.998 |
| CinguloOpercularLeftAccumbensArea     | -0.008 | -0.02, 0.003  | -1.42 | 0.157   | 0.998 |
| CinguloOpercularLeftVentraldc         | 0.003  | -0.016, 0.021 | 0.29  | 0.775   | 0.998 |
| CinguloOpercularRightCerebellumCortex | 0.002  | -0.009, 0.013 | 0.40  | 0.689   | 0.998 |
| CinguloOpercularRightThalamusProper   | 0.006  | -0.004, 0.017 | 1.21  | 0.226   | 0.998 |
| CinguloOpercularRightCaudate          | 0.009  | -0.001, 0.018 | 1.71  | 0.087   | 0.998 |
| CinguloOpercularRightPutamen          | -0.001 | -0.007, 0.005 | -0.29 | 0.769   | 0.998 |
| CinguloOpercularRightPallidum         | -0.005 | -0.019, 0.009 | -0.70 | 0.484   | 0.998 |
| CinguloOpercularRightHippocampus      | 0.001  | -0.011, 0.013 | 0.22  | 0.827   | 0.998 |
| CinguloOpercularRightAmygdala         | -0.003 | -0.02, 0.014  | -0.32 | 0.750   | 0.998 |
| CinguloOpercularRightAccumbensArea    | 0.000  | -0.017, 0.016 | -0.04 | 0.967   | 0.998 |
| CinguloOpercularRightVentraldc        | 0.001  | -0.011, 0.012 | 0.12  | 0.905   | 0.998 |
| CinguloParietalLeftCerebellumCortex   | -0.009 | -0.022, 0.004 | -1.31 | 0.190   | 0.998 |
| CinguloParietalLeftThalamusProper     | 0.001  | -0.012, 0.014 | 0.20  | 0.841   | 0.998 |

**eTable 8. Differences in functional connectivity between the never-suicidal group and the child-reported suicidality group: Welch's t-test**

| rs-fMRI indices                      | Mean   | 95%CI         | t     | p (unc) | p FDR |
|--------------------------------------|--------|---------------|-------|---------|-------|
| CinguloParietalLeftCaudate           | 0.001  | -0.01, 0.012  | 0.16  | 0.874   | 0.998 |
| CinguloParietalLeftPutamen           | -0.008 | -0.025, 0.009 | -0.93 | 0.352   | 0.998 |
| CinguloParietalLeftPallidum          | -0.006 | -0.017, 0.005 | -1.14 | 0.257   | 0.998 |
| CinguloParietalBrainStem             | -0.002 | -0.011, 0.007 | -0.46 | 0.644   | 0.998 |
| CinguloParietalLeftHippocampus       | 0.011  | 0.002, 0.02   | 2.31  | 0.021   | 0.998 |
| CinguloParietalLeftAmygdala          | 0.000  | -0.005, 0.006 | 0.15  | 0.879   | 0.998 |
| CinguloParietalLeftAccumbensArea     | -0.006 | -0.021, 0.01  | -0.71 | 0.478   | 0.998 |
| CinguloParietalLeftVentraldc         | 0.002  | -0.01, 0.014  | 0.28  | 0.782   | 0.998 |
| CinguloParietalRightCerebellumCortex | 0.001  | -0.016, 0.018 | 0.10  | 0.924   | 0.998 |
| CinguloParietalRightThalamusProper   | 0.000  | -0.017, 0.017 | 0.03  | 0.979   | 0.998 |
| CinguloParietalRightCaudate          | -0.001 | -0.012, 0.011 | -0.12 | 0.904   | 0.998 |
| CinguloParietalRightPutamen          | -0.004 | -0.017, 0.009 | -0.57 | 0.568   | 0.998 |
| CinguloParietalRightPallidum         | -0.001 | -0.014, 0.012 | -0.19 | 0.847   | 0.998 |
| CinguloParietalRightHippocampus      | 0.004  | -0.007, 0.014 | 0.72  | 0.474   | 0.998 |
| CinguloParietalRightAmygdala         | -0.006 | -0.021, 0.01  | -0.70 | 0.482   | 0.998 |
| CinguloParietalRightAccumbensArea    | -0.002 | -0.012, 0.008 | -0.43 | 0.667   | 0.998 |
| CinguloParietalRightVentraldc        | 0.006  | -0.003, 0.015 | 1.31  | 0.191   | 0.998 |
| DefaultLeftCerebellumCortex          | 0.007  | -0.002, 0.016 | 1.59  | 0.113   | 0.998 |
| DefaultLeftThalamusProper            | 0.004  | -0.002, 0.01  | 1.34  | 0.181   | 0.998 |
| DefaultLeftCaudate                   | 0.010  | -0.004, 0.025 | 1.43  | 0.155   | 0.998 |
| DefaultLeftPutamen                   | 0.003  | -0.009, 0.014 | 0.49  | 0.623   | 0.998 |
| DefaultLeftPallidum                  | 0.001  | -0.017, 0.018 | 0.06  | 0.953   | 0.998 |
| DefaultBrainStem                     | 0.001  | -0.015, 0.016 | 0.06  | 0.951   | 0.998 |
| DefaultLeftHippocampus               | 0.002  | -0.008, 0.012 | 0.41  | 0.681   | 0.998 |
| DefaultLeftAmygdala                  | 0.002  | -0.01, 0.014  | 0.31  | 0.757   | 0.998 |
| DefaultLeftAccumbensArea             | 0.003  | -0.009, 0.016 | 0.50  | 0.619   | 0.998 |
| DefaultLeftVentraldc                 | 0.002  | -0.009, 0.013 | 0.31  | 0.760   | 0.998 |
| DefaultRightCerebellumCortex         | -0.010 | -0.027, 0.007 | -1.13 | 0.259   | 0.998 |
| DefaultRightThalamusProper           | -0.003 | -0.013, 0.007 | -0.58 | 0.560   | 0.998 |
| DefaultRightCaudate                  | -0.007 | -0.016, 0.002 | -1.44 | 0.150   | 0.998 |
| DefaultRightPutamen                  | -0.001 | -0.011, 0.008 | -0.26 | 0.793   | 0.998 |
| DefaultRightPallidum                 | -0.002 | -0.009, 0.006 | -0.42 | 0.677   | 0.998 |
| DefaultRightHippocampus              | -0.015 | -0.031, 0     | -2.00 | 0.047   | 0.998 |
| DefaultRightAmygdala                 | -0.004 | -0.016, 0.007 | -0.77 | 0.440   | 0.998 |
| DefaultRightAccumbensArea            | 0.008  | -0.009, 0.025 | 0.90  | 0.370   | 0.998 |
| DefaultRightVentraldc                | -0.004 | -0.021, 0.013 | -0.49 | 0.628   | 0.998 |
| DorsalAttentionLeftCerebellumCortex  | 0.009  | -0.002, 0.02  | 1.60  | 0.110   | 0.998 |
| DorsalAttentionLeftThalamusProper    | -0.004 | -0.017, 0.008 | -0.70 | 0.481   | 0.998 |
| DorsalAttentionLeftCaudate           | -0.001 | -0.013, 0.012 | -0.11 | 0.915   | 0.998 |
| DorsalAttentionLeftPutamen           | 0.008  | -0.004, 0.021 | 1.28  | 0.201   | 0.998 |
| DorsalAttentionLeftPallidum          | -0.018 | -0.036, 0     | -1.94 | 0.054   | 0.998 |
| DorsalAttentionBrainStem             | -0.010 | -0.021, 0.001 | -1.75 | 0.081   | 0.998 |
| DorsalAttentionLeftHippocampus       | 0.012  | 0.002, 0.022  | 2.33  | 0.020   | 0.998 |

**eTable 8. Differences in functional connectivity between the never-suicidal group and the child-reported suicidality group: Welch's t-test**

| rs-fMRI indices                            | Mean   | 95%CI         | t     | p (unc) | p FDR |
|--------------------------------------------|--------|---------------|-------|---------|-------|
| DorsalAttentionLeftAmygdala                | 0.001  | -0.008, 0.01  | 0.22  | 0.826   | 0.998 |
| DorsalAttentionLeftAccumbensArea           | -0.001 | -0.007, 0.006 | -0.16 | 0.875   | 0.998 |
| DorsalAttentionLeftVentraldc               | -0.013 | -0.03, 0.004  | -1.50 | 0.135   | 0.998 |
| DorsalAttentionRightCerebellumCortex       | -0.001 | -0.012, 0.01  | -0.26 | 0.795   | 0.998 |
| DorsalAttentionRightThalamusProper         | 0.001  | -0.015, 0.016 | 0.10  | 0.923   | 0.998 |
| DorsalAttentionRightCaudate                | -0.008 | -0.024, 0.008 | -0.97 | 0.332   | 0.998 |
| DorsalAttentionRightPutamen                | 0.004  | -0.007, 0.014 | 0.72  | 0.473   | 0.998 |
| DorsalAttentionRightPallidum               | 0.000  | -0.012, 0.011 | -0.05 | 0.962   | 0.998 |
| DorsalAttentionRightHippocampus            | 0.001  | -0.011, 0.012 | 0.15  | 0.880   | 0.998 |
| DorsalAttentionRightAmygdala               | -0.003 | -0.014, 0.008 | -0.57 | 0.567   | 0.998 |
| DorsalAttentionRightAccumbensArea          | -0.014 | -0.029, 0.002 | -1.75 | 0.081   | 0.998 |
| DorsalAttentionRightVentraldc              | -0.006 | -0.016, 0.004 | -1.26 | 0.207   | 0.998 |
| FrontoParietalLeftCerebellumCortex         | 0.004  | -0.005, 0.013 | 0.83  | 0.407   | 0.998 |
| FrontoParietalLeftThalamusProper           | -0.002 | -0.011, 0.007 | -0.39 | 0.698   | 0.998 |
| FrontoParietalLeftCaudate                  | -0.003 | -0.01, 0.003  | -0.94 | 0.346   | 0.998 |
| FrontoParietalLeftPutamen                  | -0.013 | -0.027, 0.001 | -1.82 | 0.070   | 0.998 |
| FrontoParietalLeftPallidum                 | 0.000  | -0.011, 0.011 | 0.02  | 0.986   | 0.998 |
| FrontoParietalBrainStem                    | -0.002 | -0.018, 0.014 | -0.24 | 0.812   | 0.998 |
| FrontoParietalLeftHippocampus              | -0.009 | -0.026, 0.007 | -1.11 | 0.269   | 0.998 |
| FrontoParietalLeftAmygdala                 | 0.002  | -0.008, 0.011 | 0.31  | 0.755   | 0.998 |
| FrontoParietalLeftAccumbensArea            | 0.000  | -0.011, 0.012 | 0.06  | 0.951   | 0.998 |
| FrontoParietalLeftVentraldc                | 0.005  | -0.006, 0.015 | 0.84  | 0.400   | 0.998 |
| FrontoParietalRightCerebellumCortex        | 0.009  | -0.001, 0.019 | 1.81  | 0.071   | 0.998 |
| FrontoParietalRightThalamusProper          | -0.009 | -0.025, 0.008 | -1.03 | 0.305   | 0.998 |
| FrontoParietalRightCaudate                 | -0.001 | -0.012, 0.01  | -0.23 | 0.820   | 0.998 |
| FrontoParietalRightPutamen                 | 0.006  | -0.004, 0.016 | 1.24  | 0.216   | 0.998 |
| FrontoParietalRightPallidum                | 0.003  | -0.006, 0.013 | 0.73  | 0.465   | 0.998 |
| FrontoParietalRightHippocampus             | 0.000  | -0.006, 0.007 | 0.13  | 0.899   | 0.998 |
| FrontoParietalRightAmygdala                | -0.001 | -0.015, 0.013 | -0.13 | 0.894   | 0.998 |
| FrontoParietalRightAccumbensArea           | 0.003  | -0.008, 0.013 | 0.47  | 0.641   | 0.998 |
| FrontoParietalRightVentraldc               | -0.004 | -0.019, 0.01  | -0.59 | 0.558   | 0.998 |
| RetrosplenialTemporalLeftCerebellumCortex  | 0.006  | -0.005, 0.017 | 1.02  | 0.309   | 0.998 |
| RetrosplenialTemporalLeftThalamusProper    | -0.001 | -0.012, 0.009 | -0.25 | 0.806   | 0.998 |
| RetrosplenialTemporalLeftCaudate           | -0.002 | -0.013, 0.008 | -0.41 | 0.683   | 0.998 |
| RetrosplenialTemporalLeftPutamen           | -0.007 | -0.013, 0     | -2.01 | 0.045   | 0.998 |
| RetrosplenialTemporalLeftPallidum          | 0.005  | -0.01, 0.019  | 0.63  | 0.528   | 0.998 |
| RetrosplenialTemporalBrainStem             | -0.001 | -0.014, 0.011 | -0.20 | 0.843   | 0.998 |
| RetrosplenialTemporalLeftHippocampus       | 0.003  | -0.014, 0.02  | 0.38  | 0.701   | 0.998 |
| RetrosplenialTemporalLeftAmygdala          | 0.000  | -0.017, 0.016 | -0.03 | 0.978   | 0.998 |
| RetrosplenialTemporalLeftAccumbensArea     | 0.002  | -0.009, 0.013 | 0.36  | 0.721   | 0.998 |
| RetrosplenialTemporalLeftVentraldc         | 0.001  | -0.013, 0.016 | 0.20  | 0.844   | 0.998 |
| RetrosplenialTemporalRightCerebellumCortex | -0.005 | -0.021, 0.01  | -0.68 | 0.495   | 0.998 |

**eTable 8. Differences in functional connectivity between the never-suicidal group and the child-reported suicidality group: Welch's t-test**

| <b>rs-fMRI indices</b>                   | <b>Mean</b> | <b>95%CI</b>   | <b>t</b> | <b>p (unc)</b> | <b>p FDR</b> |
|------------------------------------------|-------------|----------------|----------|----------------|--------------|
| RetrosplenialTemporalRightThalamusProper | -0.013      | -0.025, -0.001 | -2.06    | 0.040          | 0.998        |
| RetrosplenialTemporalRightCaudate        | -0.001      | -0.019, 0.017  | -0.12    | 0.904          | 0.998        |
| RetrosplenialTemporalRightPutamen        | 0.000       | -0.01, 0.011   | 0.04     | 0.965          | 0.998        |
| RetrosplenialTemporalRightPallidum       | -0.006      | -0.016, 0.004  | -1.25    | 0.211          | 0.998        |
| RetrosplenialTemporalRightHippocampus    | 0.000       | -0.01, 0.009   | -0.05    | 0.961          | 0.998        |
| RetrosplenialTemporalRightAmygdala       | 0.002       | -0.004, 0.008  | 0.60     | 0.550          | 0.998        |
| RetrosplenialTemporalRightAccumbensArea  | 0.000       | -0.014, 0.015  | 0.04     | 0.965          | 0.998        |
| RetrosplenialTemporalRightVentraldc      | -0.005      | -0.019, 0.008  | -0.75    | 0.452          | 0.998        |
| SensorimotorHandLeftCerebellumCortex     | -0.001      | -0.02, 0.017   | -0.13    | 0.894          | 0.998        |
| SensorimotorHandLeftThalamusProper       | -0.007      | -0.023, 0.009  | -0.86    | 0.391          | 0.998        |
| SensorimotorHandLeftCaudate              | 0.006       | -0.006, 0.017  | 0.91     | 0.363          | 0.998        |
| SensorimotorHandLeftPutamen              | 0.000       | -0.012, 0.013  | 0.05     | 0.961          | 0.998        |
| SensorimotorHandLeftPallidum             | 0.002       | -0.011, 0.015  | 0.31     | 0.758          | 0.998        |
| SensorimotorHandBrainStem                | -0.012      | -0.024, 0      | -2.02    | 0.044          | 0.998        |
| SensorimotorHandLeftHippocampus          | -0.006      | -0.024, 0.012  | -0.62    | 0.535          | 0.998        |
| SensorimotorHandLeftAmygdala             | 0.000       | -0.011, 0.011  | -0.04    | 0.971          | 0.998        |
| SensorimotorHandLeftAccumbensArea        | 0.002       | -0.009, 0.012  | 0.30     | 0.762          | 0.998        |
| SensorimotorHandLeftVentraldc            | 0.005       | -0.005, 0.015  | 1.03     | 0.306          | 0.998        |
| SensorimotorHandRightCerebellumCortex    | -0.001      | -0.008, 0.005  | -0.38    | 0.706          | 0.998        |
| SensorimotorHandRightThalamusProper      | -0.011      | -0.025, 0.003  | -1.60    | 0.111          | 0.998        |
| SensorimotorHandRightCaudate             | 0.005       | -0.008, 0.017  | 0.70     | 0.482          | 0.998        |
| SensorimotorHandRightPutamen             | -0.003      | -0.02, 0.014   | -0.36    | 0.721          | 0.998        |
| SensorimotorHandRightPallidum            | 0.003       | -0.013, 0.018  | 0.34     | 0.731          | 0.998        |
| SensorimotorHandRightHippocampus         | 0.002       | -0.009, 0.013  | 0.31     | 0.760          | 0.998        |
| SensorimotorHandRightAmygdala            | 0.003       | -0.01, 0.017   | 0.47     | 0.636          | 0.998        |
| SensorimotorHandRightAccumbensArea       | -0.002      | -0.015, 0.011  | -0.27    | 0.784          | 0.998        |
| SensorimotorHandRightVentraldc           | 0.001       | -0.01, 0.012   | 0.16     | 0.871          | 0.998        |
| SensorimotorMouthLeftCerebellumCortex    | -0.001      | -0.017, 0.015  | -0.15    | 0.882          | 0.998        |
| SensorimotorMouthLeftThalamusProper      | -0.008      | -0.019, 0.003  | -1.44    | 0.150          | 0.998        |
| SensorimotorMouthLeftCaudate             | -0.002      | -0.012, 0.007  | -0.48    | 0.629          | 0.998        |
| SensorimotorMouthLeftPutamen             | 0.006       | -0.003, 0.015  | 1.27     | 0.203          | 0.998        |
| SensorimotorMouthLeftPallidum            | -0.001      | -0.007, 0.005  | -0.37    | 0.709          | 0.998        |
| SensorimotorMouthBrainStem               | 0.002       | -0.013, 0.016  | 0.23     | 0.822          | 0.998        |
| SensorimotorMouthLeftHippocampus         | -0.004      | -0.015, 0.008  | -0.59    | 0.557          | 0.998        |
| SensorimotorMouthLeftAmygdala            | -0.007      | -0.024, 0.009  | -0.85    | 0.394          | 0.998        |
| SensorimotorMouthLeftAccumbensArea       | 0.000       | -0.016, 0.017  | 0.03     | 0.978          | 0.998        |
| SensorimotorMouthLeftVentraldc           | -0.001      | -0.012, 0.011  | -0.11    | 0.909          | 0.998        |
| SensorimotorMouthRightCerebellumCortex   | -0.004      | -0.017, 0.008  | -0.65    | 0.515          | 0.998        |
| SensorimotorMouthRightThalamusProper     | -0.002      | -0.015, 0.011  | -0.33    | 0.742          | 0.998        |
| SensorimotorMouthRightCaudate            | -0.004      | -0.015, 0.008  | -0.62    | 0.537          | 0.998        |
| SensorimotorMouthRightPutamen            | -0.001      | -0.017, 0.014  | -0.18    | 0.859          | 0.998        |
| SensorimotorMouthRightPallidum           | 0.000       | -0.01, 0.009   | -0.06    | 0.956          | 0.998        |
| SensorimotorMouthRightHippocampus        | -0.005      | -0.013, 0.004  | -1.01    | 0.312          | 0.998        |

**eTable 8. Differences in functional connectivity between the never-suicidal group and the child-reported suicidality group: Welch's t-test**

| <b>rs-fMRI indices</b>                | <b>Mean</b> | <b>95%CI</b>   | <b>t</b> | <b>p (unc)</b> | <b>p FDR</b> |
|---------------------------------------|-------------|----------------|----------|----------------|--------------|
| SensorimotorMouthRightAmygdala        | 0.007       | -0.002, 0.016  | 1.60     | 0.111          | 0.998        |
| SensorimotorMouthRightAccumbensArea   | 0.003       | -0.003, 0.009  | 1.00     | 0.320          | 0.998        |
| SensorimotorMouthRightVentraldc       | -0.002      | -0.015, 0.012  | -0.27    | 0.788          | 0.998        |
| SaliencLeftCerebellumCortex           | 0.004       | -0.007, 0.015  | 0.71     | 0.477          | 0.998        |
| SaliencLeftThalamusProper             | -0.001      | -0.018, 0.016  | -0.13    | 0.899          | 0.998        |
| SaliencLeftCaudate                    | 0.001       | -0.015, 0.016  | 0.09     | 0.932          | 0.998        |
| SaliencLeftPutamen                    | 0.007       | -0.003, 0.016  | 1.41     | 0.158          | 0.998        |
| SaliencLeftPallidum                   | -0.007      | -0.019, 0.005  | -1.16    | 0.248          | 0.998        |
| SaliencBrainStem                      | 0.001       | -0.01, 0.013   | 0.24     | 0.813          | 0.998        |
| SaliencLeftHippocampus                | 0.006       | -0.005, 0.018  | 1.09     | 0.277          | 0.998        |
| SaliencLeftAmygdala                   | -0.022      | -0.039, -0.004 | -2.45    | 0.015          | 0.998        |
| SaliencLeftAccumbensArea              | -0.012      | -0.023, -0.001 | -2.06    | 0.040          | 0.998        |
| SaliencLeftVentraldc                  | 0.007       | -0.003, 0.017  | 1.33     | 0.184          | 0.998        |
| SaliencRightCerebellumCortex          | 0.002       | -0.008, 0.011  | 0.36     | 0.721          | 0.998        |
| SaliencRightThalamusProper            | 0.004       | -0.002, 0.011  | 1.29     | 0.199          | 0.998        |
| SaliencRightCaudate                   | -0.010      | -0.027, 0.007  | -1.19    | 0.236          | 0.998        |
| SaliencRightPutamen                   | 0.003       | -0.008, 0.014  | 0.59     | 0.555          | 0.998        |
| SaliencRightPallidum                  | -0.002      | -0.018, 0.015  | -0.18    | 0.855          | 0.998        |
| SaliencRightHippocampus               | -0.006      | -0.022, 0.011  | -0.70    | 0.481          | 0.998        |
| SaliencRightAmygdala                  | -0.003      | -0.014, 0.007  | -0.61    | 0.545          | 0.998        |
| SaliencRightAccumbensArea             | 0.003       | -0.009, 0.015  | 0.53     | 0.597          | 0.998        |
| SaliencRightVentraldc                 | -0.008      | -0.02, 0.003   | -1.41    | 0.160          | 0.998        |
| VentralAttentionLeftCerebellumCortex  | -0.004      | -0.015, 0.007  | -0.80    | 0.427          | 0.998        |
| VentralAttentionLeftThalamusProper    | -0.006      | -0.023, 0.01   | -0.75    | 0.454          | 0.998        |
| VentralAttentionLeftCaudate           | -0.003      | -0.013, 0.008  | -0.50    | 0.616          | 0.998        |
| VentralAttentionLeftPutamen           | -0.001      | -0.01, 0.008   | -0.18    | 0.855          | 0.998        |
| VentralAttentionLeftPallidum          | 0.004       | -0.005, 0.013  | 0.83     | 0.406          | 0.998        |
| VentralAttentionBrainStem             | -0.001      | -0.007, 0.006  | -0.16    | 0.873          | 0.998        |
| VentralAttentionLeftHippocampus       | -0.015      | -0.031, 0.001  | -1.91    | 0.057          | 0.998        |
| VentralAttentionLeftAmygdala          | -0.002      | -0.013, 0.008  | -0.42    | 0.674          | 0.998        |
| VentralAttentionLeftAccumbensArea     | -0.009      | -0.024, 0.006  | -1.14    | 0.255          | 0.998        |
| VentralAttentionLeftVentraldc         | 0.003       | -0.013, 0.019  | 0.35     | 0.728          | 0.998        |
| VentralAttentionRightCerebellumCortex | -0.003      | -0.013, 0.007  | -0.66    | 0.510          | 0.998        |
| VentralAttentionRightThalamusProper   | 0.005       | -0.007, 0.017  | 0.83     | 0.408          | 0.998        |
| VentralAttentionRightCaudate          | 0.005       | -0.006, 0.016  | 0.89     | 0.374          | 0.998        |
| VentralAttentionRightPutamen          | 0.004       | -0.006, 0.014  | 0.77     | 0.445          | 0.998        |
| VentralAttentionRightPallidum         | -0.004      | -0.021, 0.012  | -0.54    | 0.591          | 0.998        |
| VentralAttentionRightHippocampus      | 0.003       | -0.007, 0.014  | 0.62     | 0.538          | 0.998        |
| VentralAttentionRightAmygdala         | 0.000       | -0.009, 0.009  | -0.02    | 0.981          | 0.998        |
| VentralAttentionRightAccumbensArea    | -0.001      | -0.009, 0.008  | -0.17    | 0.862          | 0.998        |
| VentralAttentionRightVentraldc        | 0.003       | -0.004, 0.009  | 0.81     | 0.421          | 0.998        |
| VisualLeftCerebellumCortex            | 0.007       | -0.009, 0.022  | 0.85     | 0.396          | 0.998        |



**eTable 8. Differences in functional connectivity between the never-suicidal group and the child-reported suicidality group: Welch's t-test**

| <b>rs-fMRI indices</b>          | <b>Mean</b> | <b>95%CI</b>   | <b>t</b> | <b>p (unc)</b> | <b>p FDR</b> |
|---------------------------------|-------------|----------------|----------|----------------|--------------|
| VisualLeftThalamusProper        | -0.003      | -0.013, 0.008  | -0.51    | 0.608          | 0.998        |
| VisualLeftCaudate               | 0.006       | -0.009, 0.022  | 0.81     | 0.418          | 0.998        |
| VisualLeftPutamen               | 0.004       | -0.011, 0.018  | 0.48     | 0.631          | 0.998        |
| VisualLeftPallidum              | -0.001      | -0.011, 0.009  | -0.18    | 0.853          | 0.998        |
| VisualBrainStem                 | -0.002      | -0.014, 0.01   | -0.36    | 0.716          | 0.998        |
| VisualLeftHippocampus           | 0.010       | -0.003, 0.023  | 1.58     | 0.116          | 0.998        |
| VisualLeftAmygdala              | 0.008       | -0.004, 0.019  | 1.27     | 0.204          | 0.998        |
| VisualLeftAccumbensArea         | -0.003      | -0.021, 0.014  | -0.38    | 0.701          | 0.998        |
| VisualLeftVentraldc             | -0.011      | -0.021, -0.001 | -2.14    | 0.033          | 0.998        |
| VisualRightCerebellumCortex     | -0.006      | -0.016, 0.003  | -1.31    | 0.190          | 0.998        |
| VisualRightThalamusProper       | -0.007      | -0.016, 0.003  | -1.45    | 0.148          | 0.998        |
| VisualRightCaudate              | 0.001       | -0.006, 0.007  | 0.20     | 0.845          | 0.998        |
| VisualRightPutamen              | 0.002       | -0.012, 0.017  | 0.33     | 0.742          | 0.998        |
| VisualRightPallidum             | 0.000       | -0.012, 0.011  | -0.08    | 0.936          | 0.998        |
| VisualRightHippocampus          | 0.002       | -0.014, 0.019  | 0.28     | 0.780          | 0.998        |
| VisualRightAmygdala             | 0.004       | -0.013, 0.021  | 0.48     | 0.634          | 0.998        |
| VisualRightAccumbensArea        | 0.010       | 0, 0.019       | 1.95     | 0.052          | 0.998        |
| VisualRightVentraldc            | 0.004       | -0.009, 0.017  | 0.62     | 0.536          | 0.998        |
| WithinAuditory                  | 0.001       | -0.009, 0.011  | 0.25     | 0.802          | 0.998        |
| WithinCinguloOpercula           | -0.006      | -0.015, 0.003  | -1.38    | 0.170          | 0.998        |
| WithinCinguloParietal           | 0.012       | -0.015, 0.038  | 0.84     | 0.399          | 0.998        |
| WithinDefault                   | -0.001      | -0.009, 0.006  | -0.33    | 0.745          | 0.998        |
| WithinDorsalAttention           | 0.004       | -0.004, 0.011  | 0.94     | 0.349          | 0.998        |
| WithinFrontoParietal            | 0.004       | -0.003, 0.012  | 1.08     | 0.281          | 0.998        |
| WithinRetrosplenialTemporal     | -0.002      | -0.019, 0.015  | -0.27    | 0.788          | 0.998        |
| WithinSensorimotorHand          | 0.001       | -0.009, 0.01   | 0.14     | 0.889          | 0.998        |
| WithinSensorimotorMouth         | 0.008       | -0.011, 0.028  | 0.84     | 0.399          | 0.998        |
| WithinSalience                  | 0.000       | -0.017, 0.017  | -0.01    | 0.994          | 0.998        |
| WithinVentralAttention          | 0.004       | -0.005, 0.012  | 0.86     | 0.393          | 0.998        |
| WithinVisual                    | -0.013      | -0.025, -0.002 | -2.26    | 0.025          | 0.998        |
| AuditoryCinguloOpercular        | -0.001      | -0.008, 0.006  | -0.24    | 0.812          | 0.998        |
| AuditoryCinguloParietal         | 0.003       | -0.006, 0.012  | 0.59     | 0.555          | 0.998        |
| AuditoryDefault                 | 0.000       | -0.006, 0.006  | -0.08    | 0.938          | 0.998        |
| AuditoryDorsalAttention         | -0.002      | -0.007, 0.003  | -0.78    | 0.434          | 0.998        |
| AuditoryFrontoParietal          | 0.001       | -0.005, 0.007  | 0.32     | 0.751          | 0.998        |
| AuditoryRetrosplenialTemporal   | -0.001      | -0.01, 0.007   | -0.34    | 0.736          | 0.998        |
| AuditorySensorimotorHand        | 0.002       | -0.006, 0.009  | 0.40     | 0.690          | 0.998        |
| AuditorySensorimotorMouth       | -0.001      | -0.012, 0.01   | -0.20    | 0.841          | 0.998        |
| AuditorySalience                | 0.000       | -0.009, 0.01   | 0.07     | 0.945          | 0.998        |
| AuditoryVentralAttention        | 0.002       | -0.004, 0.009  | 0.71     | 0.477          | 0.998        |
| AuditoryVisual                  | 0.002       | -0.006, 0.009  | 0.45     | 0.655          | 0.998        |
| CinguloOpercularCinguloParietal | -0.001      | -0.009, 0.008  | -0.19    | 0.849          | 0.998        |
| CinguloOpercularDefault         | -0.002      | -0.008, 0.005  | -0.49    | 0.624          | 0.998        |

**eTable 8. Differences in functional connectivity between the never-suicidal group and the child-reported suicidality group: Welch's t-test**

| rs-fMRI indices                        | Mean   | 95%CI          | t     | p (unc) | p FDR |
|----------------------------------------|--------|----------------|-------|---------|-------|
| CinguloOpercularDorsalAttention        | 0.002  | -0.003, 0.008  | 0.85  | 0.395   | 0.998 |
| CinguloOpercularFrontoParietal         | 0.001  | -0.005, 0.006  | 0.26  | 0.792   | 0.998 |
| CinguloOpercularRetrosplenialTemporal  | 0.004  | -0.005, 0.012  | 0.82  | 0.413   | 0.998 |
| CinguloOpercularSensorimotorHand       | 0.004  | -0.002, 0.01   | 1.37  | 0.171   | 0.998 |
| CinguloOpercularSensorimotorMouth      | 0.000  | -0.009, 0.009  | 0.00  | 0.998   | 0.998 |
| CinguloOpercularSalience               | -0.003 | -0.011, 0.005  | -0.66 | 0.508   | 0.998 |
| CinguloOpercularVentralAttention       | 0.003  | -0.004, 0.009  | 0.86  | 0.391   | 0.998 |
| CinguloOpercularVisual                 | -0.004 | -0.011, 0.004  | -1.00 | 0.319   | 0.998 |
| CinguloParietalDefault                 | 0.001  | -0.008, 0.011  | 0.23  | 0.821   | 0.998 |
| CinguloParietalDorsalAttention         | -0.001 | -0.01, 0.008   | -0.19 | 0.846   | 0.998 |
| CinguloParietalFrontoParietal          | -0.013 | -0.022, -0.004 | -2.95 | 0.003   | 0.998 |
| CinguloParietalRetrosplenialTemporal   | 0.002  | -0.011, 0.015  | 0.32  | 0.749   | 0.998 |
| CinguloParietalSensorimotorHand        | 0.002  | -0.008, 0.011  | 0.32  | 0.750   | 0.998 |
| CinguloParietalSensorimotorMouth       | 0.003  | -0.009, 0.016  | 0.54  | 0.587   | 0.998 |
| CinguloParietalSalience                | 0.002  | -0.011, 0.015  | 0.29  | 0.769   | 0.998 |
| CinguloParietalVentralAttention        | 0.004  | -0.004, 0.012  | 0.98  | 0.327   | 0.998 |
| CinguloParietalVisual                  | -0.003 | -0.014, 0.008  | -0.52 | 0.604   | 0.998 |
| DefaultDorsalAttention                 | 0.003  | -0.004, 0.009  | 0.87  | 0.387   | 0.998 |
| DefaultFrontoParietal                  | 0.003  | -0.003, 0.008  | 0.90  | 0.371   | 0.998 |
| DefaultRetrosplenialTemporal           | -0.003 | -0.011, 0.005  | -0.63 | 0.531   | 0.998 |
| DefaultSensorimotorHand                | -0.004 | -0.009, 0.002  | -1.21 | 0.226   | 0.998 |
| DefaultSensorimotorMouth               | 0.006  | -0.002, 0.014  | 1.55  | 0.122   | 0.998 |
| DefaultSalience                        | 0.000  | -0.009, 0.008  | -0.10 | 0.921   | 0.998 |
| DefaultVentralAttention                | -0.001 | -0.007, 0.006  | -0.16 | 0.876   | 0.998 |
| DefaultVisual                          | 0.005  | -0.002, 0.011  | 1.37  | 0.172   | 0.998 |
| DorsalAttentionFrontoParietal          | -0.002 | -0.007, 0.004  | -0.60 | 0.546   | 0.998 |
| DorsalAttentionRetrosplenialTemporal   | -0.001 | -0.009, 0.006  | -0.30 | 0.761   | 0.998 |
| DorsalAttentionSensorimotorHand        | 0.004  | -0.001, 0.009  | 1.42  | 0.156   | 0.998 |
| DorsalAttentionSensorimotorMouth       | -0.001 | -0.008, 0.007  | -0.20 | 0.840   | 0.998 |
| DorsalAttentionSalience                | 0.001  | -0.007, 0.008  | 0.14  | 0.885   | 0.998 |
| DorsalAttentionVentralAttention        | -0.001 | -0.007, 0.005  | -0.41 | 0.686   | 0.998 |
| DorsalAttentionVisual                  | -0.003 | -0.009, 0.004  | -0.74 | 0.460   | 0.998 |
| FrontoParietalRetrosplenialTemporal    | -0.005 | -0.012, 0.001  | -1.64 | 0.101   | 0.998 |
| FrontoParietalSensorimotorHand         | 0.000  | -0.006, 0.006  | -0.01 | 0.989   | 0.998 |
| FrontoParietalSensorimotorMouth        | 0.002  | -0.006, 0.009  | 0.50  | 0.617   | 0.998 |
| FrontoParietalSalience                 | 0.008  | 0.001, 0.016   | 2.18  | 0.030   | 0.998 |
| FrontoParietalVentralAttention         | 0.002  | -0.003, 0.007  | 0.65  | 0.519   | 0.998 |
| FrontoParietalVisual                   | -0.003 | -0.008, 0.003  | -0.88 | 0.379   | 0.998 |
| RetrosplenialTemporalSensorimotorHand  | -0.005 | -0.012, 0.003  | -1.25 | 0.213   | 0.998 |
| RetrosplenialTemporalSensorimotorMouth | -0.005 | -0.015, 0.006  | -0.87 | 0.385   | 0.998 |
| RetrosplenialTemporalSalience          | -0.003 | -0.013, 0.007  | -0.55 | 0.582   | 0.998 |
| RetrosplenialTemporalVentralAttention  | -0.003 | -0.011, 0.005  | -0.73 | 0.465   | 0.998 |

**eTable 8. Differences in functional connectivity between the never-suicidal group and the child-reported suicidality group: Welch's t-test**

| rs-fMRI indices                   | Mean   | 95%CI         | t     | p (unc) | p FDR |
|-----------------------------------|--------|---------------|-------|---------|-------|
| RetrosplenialTemporalVisual       | 0.002  | -0.008, 0.011 | 0.39  | 0.693   | 0.998 |
| SensorimotorHandSensorimotorMouth | 0.005  | -0.005, 0.015 | 0.97  | 0.335   | 0.998 |
| SensorimotorHandSalience          | 0.002  | -0.006, 0.009 | 0.41  | 0.679   | 0.998 |
| SensorimotorHandVentralAttention  | 0.000  | -0.006, 0.006 | 0.00  | 0.997   | 0.998 |
| SensorimotorHandVisual            | 0.004  | -0.003, 0.011 | 1.21  | 0.229   | 0.998 |
| SensorimotorMouthSalience         | -0.008 | -0.019, 0.003 | -1.39 | 0.167   | 0.998 |
| SensorimotorMouthVentralAttention | 0.002  | -0.005, 0.009 | 0.57  | 0.572   | 0.998 |
| SensorimotorMouthVisual           | -0.005 | -0.015, 0.004 | -1.07 | 0.286   | 0.998 |
| SalienceVentralAttention          | -0.001 | -0.009, 0.007 | -0.22 | 0.825   | 0.998 |
| SalienceVisual                    | -0.008 | -0.017, 0.001 | -1.71 | 0.089   | 0.998 |
| VentralAttentionVisual            | 0.000  | -0.007, 0.006 | -0.05 | 0.961   | 0.998 |

**Bold** denotes group differences at p<0.05 uncorrected

**eTable 9. Differences in functional connectivity between the never-suicidal group and the caregiver-reported suicidality group: Welch's t-test**

| rs-fMRI indices                      | Mean   | 95%CI          | t     | p (unc)      | p FDR |
|--------------------------------------|--------|----------------|-------|--------------|-------|
| AuditoryLeftCerebellumCortex         | -0.006 | -0.019, 0.009  | -0.77 | 0.444        | 0.885 |
| AuditoryLeftThalamusProper           | -0.003 | -0.015, 0.01   | -0.39 | 0.698        | 0.943 |
| AuditoryLeftCaudate                  | -0.003 | -0.021, 0.015  | -0.30 | 0.761        | 0.956 |
| AuditoryLeftPutamen                  | 0.003  | -0.009, 0.015  | 0.45  | 0.654        | 0.928 |
| AuditoryLeftPallidum                 | -0.002 | -0.013, 0.009  | -0.32 | 0.748        | 0.956 |
| AuditoryBrainStem                    | 0.009  | -0.003, 0.021  | 1.50  | 0.135        | 0.689 |
| AuditoryLeftHippocampus              | 0.002  | -0.005, 0.009  | 0.48  | 0.630        | 0.928 |
| AuditoryLeftAmygdala                 | 0.008  | -0.006, 0.022  | 1.10  | 0.273        | 0.815 |
| AuditoryLeftAccumbensArea            | -0.016 | -0.029, -0.003 | -2.36 | <b>0.019</b> | 0.458 |
| AuditoryLeftVentraldc                | -0.002 | -0.021, 0.016  | -0.24 | 0.814        | 0.962 |
| AuditoryRightCerebellumCortex        | -0.011 | -0.028, 0.006  | -1.33 | 0.185        | 0.782 |
| AuditoryRightThalamusProper          | 0.008  | -0.003, 0.02   | 1.39  | 0.164        | 0.750 |
| AuditoryRightCaudate                 | -0.001 | -0.017, 0.014  | -0.17 | 0.866        | 0.966 |
| AuditoryRightPutamen                 | 0.002  | -0.013, 0.017  | 0.24  | 0.807        | 0.962 |
| AuditoryRightPallidum                | -0.006 | -0.019, 0.007  | -0.91 | 0.363        | 0.834 |
| AuditoryRightHippocampus             | -0.005 | -0.024, 0.015  | -0.50 | 0.618        | 0.928 |
| AuditoryRightAmygdala                | 0.007  | -0.005, 0.018  | 1.13  | 0.258        | 0.807 |
| AuditoryRightAccumbensArea           | 0.003  | -0.007, 0.013  | 0.63  | 0.528        | 0.928 |
| AuditoryRightVentraldc               | 0.013  | 0.003, 0.023   | 2.55  | <b>0.011</b> | 0.458 |
| CinguloOpercularLeftCerebellumCortex | 0.000  | -0.006, 0.007  | 0.05  | 0.958        | 0.994 |
| CinguloOpercularLeftThalamusProper   | -0.009 | -0.025, 0.008  | -1.04 | 0.299        | 0.815 |
| CinguloOpercularLeftCaudate          | -0.005 | -0.019, 0.008  | -0.75 | 0.451        | 0.885 |
| CinguloOpercularLeftPutamen          | -0.007 | -0.026, 0.012  | -0.70 | 0.483        | 0.895 |
| CinguloOpercularLeftPallidum         | -0.006 | -0.023, 0.011  | -0.74 | 0.459        | 0.885 |
| CinguloOpercularBrainStem            | 0.002  | -0.01, 0.014   | 0.31  | 0.759        | 0.956 |
| CinguloOpercularLeftHippocampus      | 0.000  | -0.014, 0.014  | -0.04 | 0.965        | 0.994 |

**eTable 9. Differences in functional connectivity between the never-suicidal group and the caregiver-reported suicidality group: Welch's t-test**

| rs-fMRI indices                       | Mean   | 95%CI          | t     | p (unc)      | p FDR |
|---------------------------------------|--------|----------------|-------|--------------|-------|
| CinguloOpercularLeftAmygdala          | -0.004 | -0.019, 0.01   | -0.61 | 0.543        | 0.928 |
| CinguloOpercularLeftAccumbensArea     | -0.012 | -0.024, 0.001  | -1.85 | 0.065        | 0.570 |
| CinguloOpercularLeftVentraldc         | -0.001 | -0.019, 0.018  | -0.06 | 0.952        | 0.994 |
| CinguloOpercularRightCerebellumCortex | 0.006  | -0.006, 0.017  | 0.95  | 0.341        | 0.815 |
| CinguloOpercularRightThalamusProper   | -0.012 | -0.022, -0.001 | -2.16 | <b>0.031</b> | 0.458 |
| CinguloOpercularRightCaudate          | 0.008  | -0.002, 0.017  | 1.55  | 0.122        | 0.653 |
| CinguloOpercularRightPutamen          | 0.006  | 0, 0.012       | 1.84  | 0.066        | 0.570 |
| CinguloOpercularRightPallidum         | 0.002  | -0.014, 0.018  | 0.26  | 0.792        | 0.956 |
| CinguloOpercularRightHippocampus      | -0.002 | -0.015, 0.011  | -0.28 | 0.778        | 0.956 |
| CinguloOpercularRightAmygdala         | -0.008 | -0.026, 0.01   | -0.91 | 0.365        | 0.834 |
| CinguloOpercularRightAccumbensArea    | -0.003 | -0.02, 0.014   | -0.35 | 0.723        | 0.950 |
| CinguloOpercularRightVentraldc        | -0.006 | -0.018, 0.006  | -0.96 | 0.338        | 0.815 |
| CinguloParietalLeftCerebellumCortex   | -0.009 | -0.023, 0.006  | -1.20 | 0.233        | 0.782 |
| CinguloParietalLeftThalamusProper     | 0.001  | -0.014, 0.015  | 0.10  | 0.922        | 0.990 |
| CinguloParietalLeftCaudate            | -0.002 | -0.014, 0.01   | -0.38 | 0.706        | 0.943 |
| CinguloParietalLeftPutamen            | -0.018 | -0.036, 0      | -1.96 | 0.051        | 0.559 |
| CinguloParietalLeftPallidum           | 0.005  | -0.007, 0.016  | 0.76  | 0.449        | 0.885 |
| CinguloParietalBrainStem              | 0.001  | -0.009, 0.011  | 0.21  | 0.833        | 0.963 |
| CinguloParietalLeftHippocampus        | 0.017  | 0.007, 0.027   | 3.45  | <b>0.001</b> | 0.194 |
| CinguloParietalLeftAmygdala           | 0.002  | -0.004, 0.009  | 0.75  | 0.452        | 0.885 |
| CinguloParietalLeftAccumbensArea      | -0.006 | -0.023, 0.011  | -0.68 | 0.497        | 0.900 |
| CinguloParietalLeftVentraldc          | -0.001 | -0.014, 0.012  | -0.17 | 0.864        | 0.966 |
| CinguloParietalRightCerebellumCortex  | -0.006 | -0.024, 0.012  | -0.64 | 0.520        | 0.925 |
| CinguloParietalRightThalamusProper    | 0.011  | -0.006, 0.029  | 1.28  | 0.200        | 0.782 |
| CinguloParietalRightCaudate           | -0.001 | -0.013, 0.011  | -0.16 | 0.871        | 0.966 |
| CinguloParietalRightPutamen           | -0.004 | -0.018, 0.01   | -0.55 | 0.580        | 0.928 |
| CinguloParietalRightPallidum          | 0.002  | -0.012, 0.016  | 0.28  | 0.782        | 0.956 |
| CinguloParietalRightHippocampus       | -0.005 | -0.017, 0.007  | -0.78 | 0.438        | 0.885 |
| CinguloParietalRightAmygdala          | 0.000  | -0.017, 0.018  | 0.01  | 0.989        | 0.996 |
| CinguloParietalRightAccumbensArea     | 0.016  | 0.005, 0.027   | 2.92  | <b>0.004</b> | 0.443 |
| CinguloParietalRightVentraldc         | -0.001 | -0.011, 0.008  | -0.26 | 0.793        | 0.956 |
| DefaultLeftCerebellumCortex           | 0.009  | -0.001, 0.019  | 1.84  | 0.067        | 0.570 |
| DefaultLeftThalamusProper             | 0.008  | 0.002, 0.014   | 2.43  | <b>0.016</b> | 0.458 |
| DefaultLeftCaudate                    | 0.011  | -0.005, 0.026  | 1.39  | 0.167        | 0.750 |
| DefaultLeftPutamen                    | -0.003 | -0.015, 0.01   | -0.42 | 0.673        | 0.932 |
| DefaultLeftPallidum                   | -0.022 | -0.039, -0.005 | -2.54 | <b>0.011</b> | 0.458 |
| DefaultBrainStem                      | 0.013  | -0.003, 0.03   | 1.58  | 0.116        | 0.653 |
| DefaultLeftHippocampus                | 0.010  | -0.001, 0.02   | 1.87  | 0.063        | 0.570 |
| DefaultLeftAmygdala                   | -0.018 | -0.031, -0.005 | -2.71 | <b>0.007</b> | 0.458 |
| DefaultLeftAccumbensArea              | 0.005  | -0.009, 0.019  | 0.70  | 0.484        | 0.895 |
| DefaultLeftVentraldc                  | 0.008  | -0.003, 0.019  | 1.42  | 0.156        | 0.748 |
| DefaultRightCerebellumCortex          | -0.012 | -0.031, 0.006  | -1.30 | 0.196        | 0.782 |
| DefaultRightThalamusProper            | 0.007  | -0.004, 0.018  | 1.27  | 0.207        | 0.782 |

**eTable 9. Differences in functional connectivity between the never-suicidal group and the caregiver-reported suicidality group: Welch's t-test**

| rs-fMRI indices                      | Mean   | 95%CI          | t     | p (unc)      | p FDR |
|--------------------------------------|--------|----------------|-------|--------------|-------|
| DefaultRightCaudate                  | -0.007 | -0.017, 0.003  | -1.44 | 0.150        | 0.748 |
| DefaultRightPutamen                  | 0.012  | 0.001, 0.022   | 2.21  | <b>0.028</b> | 0.458 |
| DefaultRightPallidum                 | 0.006  | -0.002, 0.013  | 1.51  | 0.133        | 0.688 |
| DefaultRightHippocampus              | -0.023 | -0.039, -0.007 | -2.87 | <b>0.004</b> | 0.443 |
| DefaultRightAmygdala                 | 0.003  | -0.009, 0.016  | 0.52  | 0.605        | 0.928 |
| DefaultRightAccumbensArea            | 0.007  | -0.012, 0.026  | 0.75  | 0.454        | 0.885 |
| DefaultRightVentraldc                | -0.002 | -0.019, 0.016  | -0.18 | 0.859        | 0.966 |
| DorsalAttentionLeftCerebellumCortex  | 0.015  | 0.003, 0.026   | 2.41  | <b>0.016</b> | 0.458 |
| DorsalAttentionLeftThalamusProper    | -0.015 | -0.029, -0.002 | -2.19 | <b>0.029</b> | 0.458 |
| DorsalAttentionLeftCaudate           | 0.004  | -0.009, 0.016  | 0.57  | 0.572        | 0.928 |
| DorsalAttentionLeftPutamen           | 0.011  | -0.003, 0.025  | 1.58  | 0.116        | 0.653 |
| DorsalAttentionLeftPallidum          | 0.000  | -0.02, 0.019   | -0.04 | 0.968        | 0.994 |
| DorsalAttentionBrainStem             | -0.003 | -0.015, 0.009  | -0.48 | 0.631        | 0.928 |
| DorsalAttentionLeftHippocampus       | 0.002  | -0.01, 0.013   | 0.27  | 0.787        | 0.956 |
| DorsalAttentionLeftAmygdala          | 0.008  | -0.002, 0.018  | 1.57  | 0.118        | 0.653 |
| DorsalAttentionLeftAccumbensArea     | 0.000  | -0.007, 0.007  | 0.01  | 0.990        | 0.996 |
| DorsalAttentionLeftVentraldc         | -0.011 | -0.028, 0.006  | -1.27 | 0.203        | 0.782 |
| DorsalAttentionRightCerebellumCortex | 0.005  | -0.007, 0.017  | 0.77  | 0.442        | 0.885 |
| DorsalAttentionRightThalamusProper   | 0.008  | -0.009, 0.025  | 0.97  | 0.331        | 0.815 |
| DorsalAttentionRightCaudate          | -0.009 | -0.027, 0.008  | -1.05 | 0.296        | 0.815 |
| DorsalAttentionRightPutamen          | 0.003  | -0.008, 0.015  | 0.58  | 0.562        | 0.928 |
| DorsalAttentionRightPallidum         | -0.012 | -0.026, 0.001  | -1.77 | 0.078        | 0.596 |
| DorsalAttentionRightHippocampus      | 0.002  | -0.01, 0.015   | 0.37  | 0.715        | 0.948 |
| DorsalAttentionRightAmygdala         | 0.003  | -0.008, 0.015  | 0.54  | 0.593        | 0.928 |
| DorsalAttentionRightAccumbensArea    | -0.007 | -0.024, 0.011  | -0.74 | 0.460        | 0.885 |
| DorsalAttentionRightVentraldc        | 0.005  | -0.006, 0.016  | 0.89  | 0.374        | 0.834 |
| FrontoParietalLeftCerebellumCortex   | -0.008 | -0.018, 0.003  | -1.43 | 0.153        | 0.748 |
| FrontoParietalLeftThalamusProper     | 0.005  | -0.005, 0.014  | 0.95  | 0.340        | 0.815 |
| FrontoParietalLeftCaudate            | 0.001  | -0.006, 0.008  | 0.30  | 0.765        | 0.956 |
| FrontoParietalLeftPutamen            | -0.011 | -0.026, 0.004  | -1.42 | 0.156        | 0.748 |
| FrontoParietalLeftPallidum           | -0.001 | -0.013, 0.01   | -0.20 | 0.845        | 0.966 |
| FrontoParietalBrainStem              | -0.002 | -0.018, 0.015  | -0.19 | 0.852        | 0.966 |
| FrontoParietalLeftHippocampus        | -0.007 | -0.024, 0.01   | -0.78 | 0.434        | 0.885 |
| FrontoParietalLeftAmygdala           | 0.010  | -0.001, 0.021  | 1.75  | 0.082        | 0.610 |
| FrontoParietalLeftAccumbensArea      | -0.007 | -0.021, 0.006  | -1.06 | 0.292        | 0.815 |
| FrontoParietalLeftVentraldc          | 0.000  | -0.012, 0.012  | 0.00  | 0.996        | 0.996 |
| FrontoParietalRightCerebellumCortex  | 0.003  | -0.009, 0.014  | 0.43  | 0.664        | 0.928 |
| FrontoParietalRightThalamusProper    | 0.001  | -0.017, 0.018  | 0.09  | 0.930        | 0.991 |
| FrontoParietalRightCaudate           | -0.003 | -0.014, 0.008  | -0.56 | 0.574        | 0.928 |
| FrontoParietalRightPutamen           | -0.006 | -0.016, 0.004  | -1.13 | 0.261        | 0.807 |
| FrontoParietalRightPallidum          | 0.008  | -0.002, 0.017  | 1.64  | 0.101        | 0.653 |
| FrontoParietalRightHippocampus       | 0.001  | -0.006, 0.007  | 0.17  | 0.866        | 0.966 |

**eTable 9. Differences in functional connectivity between the never-suicidal group and the caregiver-reported suicidality group: Welch's t-test**

| rs-fMRI indices                            | Mean   | 95%CI         | t     | p (unc)      | p FDR |
|--------------------------------------------|--------|---------------|-------|--------------|-------|
| FrontoParietalRightAmygdala                | 0.000  | -0.016, 0.015 | -0.01 | 0.990        | 0.996 |
| FrontoParietalRightAccumbensArea           | 0.000  | -0.011, 0.011 | -0.01 | 0.990        | 0.996 |
| FrontoParietalRightVentraldc               | -0.006 | -0.021, 0.01  | -0.75 | 0.453        | 0.885 |
| RetrosplenialTemporalLeftCerebellumCortex  | 0.007  | -0.005, 0.02  | 1.14  | 0.255        | 0.807 |
| RetrosplenialTemporalLeftThalamusProper    | 0.000  | -0.011, 0.011 | -0.01 | 0.992        | 0.996 |
| RetrosplenialTemporalLeftCaudate           | 0.012  | 0.001, 0.024  | 2.16  | <b>0.031</b> | 0.458 |
| RetrosplenialTemporalLeftPutamen           | -0.004 | -0.01, 0.003  | -1.02 | 0.308        | 0.815 |
| RetrosplenialTemporalLeftPallidum          | 0.008  | -0.008, 0.023 | 0.95  | 0.344        | 0.816 |
| RetrosplenialTemporalBrainStem             | -0.011 | -0.023, 0.002 | -1.63 | 0.103        | 0.653 |
| RetrosplenialTemporalLeftHippocampus       | -0.002 | -0.02, 0.015  | -0.26 | 0.794        | 0.956 |
| RetrosplenialTemporalLeftAmygdala          | 0.003  | -0.015, 0.021 | 0.36  | 0.720        | 0.950 |
| RetrosplenialTemporalLeftAccumbensArea     | 0.008  | -0.004, 0.019 | 1.25  | 0.211        | 0.782 |
| RetrosplenialTemporalLeftVentraldc         | 0.002  | -0.013, 0.018 | 0.30  | 0.762        | 0.956 |
| RetrosplenialTemporalRightCerebellumCortex | -0.005 | -0.021, 0.01  | -0.70 | 0.486        | 0.895 |
| RetrosplenialTemporalRightThalamusProper   | -0.004 | -0.017, 0.008 | -0.69 | 0.493        | 0.900 |
| RetrosplenialTemporalRightCaudate          | 0.003  | -0.017, 0.022 | 0.28  | 0.778        | 0.956 |
| RetrosplenialTemporalRightPutamen          | 0.007  | -0.004, 0.017 | 1.17  | 0.242        | 0.789 |
| RetrosplenialTemporalRightPallidum         | -0.002 | -0.012, 0.009 | -0.29 | 0.770        | 0.956 |
| RetrosplenialTemporalRightHippocampus      | 0.006  | -0.004, 0.016 | 1.20  | 0.229        | 0.782 |
| RetrosplenialTemporalRightAmygdala         | 0.007  | 0.001, 0.013  | 2.21  | <b>0.028</b> | 0.458 |
| RetrosplenialTemporalRightAccumbensArea    | -0.010 | -0.025, 0.006 | -1.21 | 0.229        | 0.782 |
| RetrosplenialTemporalRightVentraldc        | 0.000  | -0.015, 0.014 | -0.06 | 0.951        | 0.994 |
| SensorimotorHandLeftCerebellumCortex       | -0.003 | -0.022, 0.015 | -0.36 | 0.716        | 0.948 |
| SensorimotorHandLeftThalamusProper         | -0.001 | -0.018, 0.016 | -0.14 | 0.888        | 0.977 |
| SensorimotorHandLeftCaudate                | 0.003  | -0.009, 0.015 | 0.48  | 0.632        | 0.928 |
| SensorimotorHandLeftPutamen                | -0.005 | -0.019, 0.009 | -0.65 | 0.515        | 0.925 |
| SensorimotorHandLeftPallidum               | -0.004 | -0.019, 0.012 | -0.47 | 0.642        | 0.928 |
| SensorimotorHandBrainStem                  | -0.003 | -0.015, 0.009 | -0.53 | 0.598        | 0.928 |
| SensorimotorHandLeftHippocampus            | 0.000  | -0.018, 0.019 | 0.02  | 0.981        | 0.996 |
| SensorimotorHandLeftAmygdala               | 0.005  | -0.006, 0.017 | 0.90  | 0.370        | 0.834 |
| SensorimotorHandLeftAccumbensArea          | 0.005  | -0.005, 0.016 | 0.99  | 0.322        | 0.815 |
| SensorimotorHandLeftVentraldc              | 0.010  | 0, 0.02       | 1.92  | 0.056        | 0.569 |
| SensorimotorHandRightCerebellumCortex      | 0.004  | -0.003, 0.01  | 1.10  | 0.272        | 0.815 |
| SensorimotorHandRightThalamusProper        | -0.008 | -0.023, 0.008 | -0.99 | 0.322        | 0.815 |
| SensorimotorHandRightCaudate               | -0.001 | -0.015, 0.013 | -0.14 | 0.892        | 0.977 |
| SensorimotorHandRightPutamen               | -0.015 | -0.032, 0.003 | -1.68 | 0.095        | 0.653 |
| SensorimotorHandRightPallidum              | 0.006  | -0.01, 0.022  | 0.75  | 0.453        | 0.885 |
| SensorimotorHandRightHippocampus           | -0.003 | -0.015, 0.009 | -0.44 | 0.661        | 0.928 |
| SensorimotorHandRightAmygdala              | -0.002 | -0.016, 0.011 | -0.34 | 0.733        | 0.956 |
| SensorimotorHandRightAccumbensArea         | 0.002  | -0.013, 0.016 | 0.23  | 0.822        | 0.963 |
| SensorimotorHandRightVentraldc             | 0.010  | -0.002, 0.021 | 1.59  | 0.112        | 0.653 |
| SensorimotorMouthLeftCerebellumCortex      | -0.004 | -0.022, 0.014 | -0.47 | 0.641        | 0.928 |
| SensorimotorMouthLeftThalamusProper        | 0.011  | -0.001, 0.023 | 1.81  | 0.072        | 0.595 |

**eTable 9. Differences in functional connectivity between the never-suicidal group and the caregiver-reported suicidality group: Welch's t-test**

| rs-fMRI indices                        | Mean   | 95%CI          | t     | p (unc)      | p FDR |
|----------------------------------------|--------|----------------|-------|--------------|-------|
| SensorimotorMouthLeftCaudate           | 0.003  | -0.007, 0.013  | 0.53  | 0.595        | 0.928 |
| SensorimotorMouthLeftPutamen           | 0.012  | 0.002, 0.022   | 2.36  | <b>0.019</b> | 0.458 |
| SensorimotorMouthLeftPallidum          | 0.007  | 0, 0.013       | 2.01  | <b>0.045</b> | 0.528 |
| SensorimotorMouthBrainStem             | -0.010 | -0.025, 0.006  | -1.25 | 0.214        | 0.782 |
| SensorimotorMouthLeftHippocampus       | -0.001 | -0.014, 0.013  | -0.13 | 0.894        | 0.977 |
| SensorimotorMouthLeftAmygdala          | -0.021 | -0.039, -0.003 | -2.25 | <b>0.025</b> | 0.458 |
| SensorimotorMouthLeftAccumbensArea     | 0.023  | 0.006, 0.041   | 2.57  | <b>0.011</b> | 0.458 |
| SensorimotorMouthLeftVentraldc         | 0.007  | -0.006, 0.019  | 1.00  | 0.319        | 0.815 |
| SensorimotorMouthRightCerebellumCortex | -0.014 | -0.028, -0.001 | -2.07 | <b>0.039</b> | 0.512 |
| SensorimotorMouthRightThalamusProper   | 0.004  | -0.01, 0.017   | 0.50  | 0.617        | 0.928 |
| SensorimotorMouthRightCaudate          | 0.006  | -0.006, 0.018  | 0.97  | 0.335        | 0.815 |
| SensorimotorMouthRightPutamen          | 0.008  | -0.009, 0.024  | 0.90  | 0.371        | 0.834 |
| SensorimotorMouthRightPallidum         | 0.010  | 0, 0.021       | 1.91  | 0.058        | 0.569 |
| SensorimotorMouthRightHippocampus      | 0.005  | -0.005, 0.015  | 0.99  | 0.323        | 0.815 |
| SensorimotorMouthRightAmygdala         | 0.006  | -0.004, 0.015  | 1.23  | 0.220        | 0.782 |
| SensorimotorMouthRightAccumbensArea    | 0.003  | -0.004, 0.009  | 0.88  | 0.379        | 0.835 |
| SensorimotorMouthRightVentraldc        | 0.007  | -0.008, 0.022  | 0.96  | 0.338        | 0.815 |
| SaliencyLeftCerebellumCortex           | 0.002  | -0.011, 0.015  | 0.28  | 0.783        | 0.956 |
| SaliencyLeftThalamusProper             | -0.005 | -0.022, 0.011  | -0.61 | 0.540        | 0.928 |
| SaliencyLeftCaudate                    | 0.018  | 0.001, 0.035   | 2.04  | <b>0.042</b> | 0.512 |
| SaliencyLeftPutamen                    | 0.007  | -0.004, 0.018  | 1.29  | 0.197        | 0.782 |
| SaliencyLeftPallidum                   | -0.001 | -0.013, 0.012  | -0.11 | 0.913        | 0.983 |
| SaliencyBrainStem                      | 0.014  | 0.001, 0.027   | 2.09  | <b>0.038</b> | 0.512 |
| SaliencyLeftHippocampus                | 0.003  | -0.009, 0.015  | 0.49  | 0.626        | 0.928 |
| SaliencyLeftAmygdala                   | -0.002 | -0.02, 0.016   | -0.21 | 0.830        | 0.963 |
| SaliencyLeftAccumbensArea              | -0.006 | -0.018, 0.006  | -1.00 | 0.317        | 0.815 |
| SaliencyLeftVentraldc                  | -0.007 | -0.019, 0.004  | -1.26 | 0.208        | 0.782 |
| SaliencyRightCerebellumCortex          | 0.004  | -0.007, 0.014  | 0.70  | 0.484        | 0.895 |
| SaliencyRightThalamusProper            | -0.001 | -0.008, 0.006  | -0.27 | 0.791        | 0.956 |
| SaliencyRightCaudate                   | 0.002  | -0.015, 0.018  | 0.21  | 0.834        | 0.963 |
| SaliencyRightPutamen                   | 0.003  | -0.008, 0.015  | 0.60  | 0.551        | 0.928 |
| SaliencyRightPallidum                  | 0.010  | -0.007, 0.026  | 1.19  | 0.235        | 0.782 |
| SaliencyRightHippocampus               | -0.015 | -0.031, 0.002  | -1.72 | 0.086        | 0.627 |
| SaliencyRightAmygdala                  | 0.004  | -0.006, 0.015  | 0.79  | 0.431        | 0.885 |
| SaliencyRightAccumbensArea             | 0.008  | -0.005, 0.021  | 1.23  | 0.220        | 0.782 |
| SaliencyRightVentraldc                 | -0.003 | -0.015, 0.009  | -0.45 | 0.651        | 0.928 |
| VentralAttentionLeftCerebellumCortex   | 0.008  | -0.004, 0.02   | 1.24  | 0.214        | 0.782 |
| VentralAttentionLeftThalamusProper     | -0.012 | -0.03, 0.007   | -1.26 | 0.210        | 0.782 |
| VentralAttentionLeftCaudate            | -0.008 | -0.019, 0.003  | -1.39 | 0.165        | 0.750 |
| VentralAttentionLeftPutamen            | -0.002 | -0.012, 0.008  | -0.41 | 0.684        | 0.942 |
| VentralAttentionLeftPallidum           | 0.004  | -0.006, 0.014  | 0.78  | 0.438        | 0.885 |
| VentralAttentionBrainStem              | -0.002 | -0.009, 0.005  | -0.53 | 0.597        | 0.928 |

**eTable 9. Differences in functional connectivity between the never-suicidal group and the caregiver-reported suicidality group: Welch's t-test**

| rs-fMRI indices                       | Mean   | 95%CI          | t     | p (unc)      | p FDR |
|---------------------------------------|--------|----------------|-------|--------------|-------|
| VentralAttentionLeftHippocampus       | -0.019 | -0.034, -0.003 | -2.34 | <b>0.020</b> | 0.458 |
| VentralAttentionLeftAmygdala          | 0.000  | -0.012, 0.012  | 0.05  | 0.958        | 0.994 |
| VentralAttentionLeftAccumbensArea     | 0.004  | -0.013, 0.02   | 0.46  | 0.647        | 0.928 |
| VentralAttentionLeftVentraldc         | 0.009  | -0.008, 0.026  | 1.05  | 0.295        | 0.815 |
| VentralAttentionRightCerebellumCortex | 0.000  | -0.011, 0.011  | 0.01  | 0.994        | 0.996 |
| VentralAttentionRightThalamusProper   | -0.005 | -0.018, 0.008  | -0.72 | 0.474        | 0.895 |
| VentralAttentionRightCaudate          | 0.003  | -0.01, 0.015   | 0.42  | 0.673        | 0.932 |
| VentralAttentionRightPutamen          | 0.003  | -0.008, 0.014  | 0.56  | 0.577        | 0.928 |
| VentralAttentionRightPallidum         | 0.009  | -0.009, 0.026  | 0.99  | 0.325        | 0.815 |
| VentralAttentionRightHippocampus      | 0.005  | -0.007, 0.016  | 0.80  | 0.425        | 0.885 |
| VentralAttentionRightAmygdala         | -0.006 | -0.016, 0.004  | -1.19 | 0.235        | 0.782 |
| VentralAttentionRightAccumbensArea    | 0.001  | -0.008, 0.01   | 0.22  | 0.827        | 0.963 |
| VentralAttentionRightVentraldc        | -0.005 | -0.011, 0.002  | -1.35 | 0.177        | 0.782 |
| VisualLeftCerebellumCortex            | 0.004  | -0.011, 0.019  | 0.51  | 0.608        | 0.928 |
| VisualLeftThalamusProper              | 0.008  | -0.002, 0.019  | 1.59  | 0.113        | 0.653 |
| VisualLeftCaudate                     | -0.002 | -0.018, 0.015  | -0.18 | 0.855        | 0.966 |
| VisualLeftPutamen                     | 0.010  | -0.008, 0.028  | 1.06  | 0.292        | 0.815 |
| VisualLeftPallidum                    | 0.002  | -0.008, 0.013  | 0.45  | 0.652        | 0.928 |
| VisualBrainStem                       | -0.005 | -0.018, 0.009  | -0.68 | 0.497        | 0.900 |
| VisualLeftHippocampus                 | -0.009 | -0.022, 0.004  | -1.40 | 0.162        | 0.750 |
| VisualLeftAmygdala                    | -0.002 | -0.015, 0.01   | -0.34 | 0.735        | 0.956 |
| VisualLeftAccumbensArea               | -0.003 | -0.02, 0.015   | -0.28 | 0.784        | 0.956 |
| VisualLeftVentraldc                   | -0.005 | -0.016, 0.007  | -0.77 | 0.443        | 0.885 |
| VisualRightCerebellumCortex           | -0.005 | -0.014, 0.005  | -0.96 | 0.339        | 0.815 |
| VisualRightThalamusProper             | 0.005  | -0.005, 0.015  | 1.01  | 0.312        | 0.815 |
| VisualRightCaudate                    | 0.003  | -0.004, 0.009  | 0.82  | 0.412        | 0.885 |
| VisualRightPutamen                    | -0.009 | -0.025, 0.006  | -1.16 | 0.248        | 0.797 |
| VisualRightPallidum                   | 0.006  | -0.006, 0.018  | 0.96  | 0.339        | 0.815 |
| VisualRightHippocampus                | -0.014 | -0.032, 0.003  | -1.59 | 0.114        | 0.653 |
| VisualRightAmygdala                   | -0.015 | -0.032, 0.002  | -1.69 | 0.091        | 0.649 |
| VisualRightAccumbensArea              | 0.003  | -0.008, 0.014  | 0.52  | 0.602        | 0.928 |
| VisualRightVentraldc                  | 0.007  | -0.008, 0.022  | 0.96  | 0.335        | 0.815 |
| WithinAuditory                        | 0.003  | -0.007, 0.013  | 0.65  | 0.517        | 0.925 |
| WithinCinguloOpercula                 | 0.003  | -0.006, 0.013  | 0.73  | 0.464        | 0.887 |
| WithinCinguloParietal                 | 0.008  | -0.019, 0.036  | 0.61  | 0.542        | 0.928 |
| WithinDefault                         | -0.002 | -0.01, 0.006   | -0.47 | 0.639        | 0.928 |
| WithinDorsalAttention                 | -0.002 | -0.01, 0.006   | -0.45 | 0.654        | 0.928 |
| WithinFrontoParietal                  | 0.002  | -0.006, 0.01   | 0.57  | 0.569        | 0.928 |
| WithinRetrosplenialTemporal           | -0.003 | -0.02, 0.014   | -0.39 | 0.696        | 0.943 |
| WithinSensorimotorHand                | 0.006  | -0.003, 0.015  | 1.28  | 0.201        | 0.782 |
| WithinSensorimotorMouth               | -0.003 | -0.023, 0.017  | -0.33 | 0.743        | 0.956 |
| WithinSalience                        | 0.002  | -0.016, 0.019  | 0.16  | 0.870        | 0.966 |
| WithinVentralAttention                | -0.006 | -0.014, 0.002  | -1.52 | 0.130        | 0.685 |



**eTable 9. Differences in functional connectivity between the never-suicidal group and the caregiver-reported suicidality group: Welch's t-test**

| rs-fMRI indices                       | Mean   | 95%CI         | t     | p (unc)      | p FDR |
|---------------------------------------|--------|---------------|-------|--------------|-------|
| WithinVisual                          | 0.008  | -0.005, 0.02  | 1.22  | 0.223        | 0.782 |
| AuditoryCinguloOpercular              | 0.006  | -0.001, 0.014 | 1.61  | 0.109        | 0.653 |
| AuditoryCinguloParietal               | 0.001  | -0.009, 0.011 | 0.19  | 0.850        | 0.966 |
| AuditoryDefault                       | -0.002 | -0.008, 0.004 | -0.61 | 0.540        | 0.928 |
| AuditoryDorsalAttention               | 0.004  | -0.002, 0.009 | 1.17  | 0.242        | 0.789 |
| AuditoryFrontoParietal                | 0.003  | -0.003, 0.009 | 0.94  | 0.347        | 0.816 |
| AuditoryRetrosplenialTemporal         | 0.000  | -0.009, 0.009 | -0.04 | 0.968        | 0.994 |
| AuditorySensorimotorHand              | 0.006  | -0.002, 0.013 | 1.55  | 0.122        | 0.653 |
| AuditorySensorimotorMouth             | 0.002  | -0.009, 0.013 | 0.38  | 0.704        | 0.943 |
| AuditorySalience                      | -0.001 | -0.011, 0.009 | -0.21 | 0.831        | 0.963 |
| AuditoryVentralAttention              | 0.003  | -0.004, 0.011 | 0.96  | 0.339        | 0.815 |
| AuditoryVisual                        | 0.002  | -0.007, 0.01  | 0.40  | 0.690        | 0.943 |
| CinguloOpercularCinguloParietal       | -0.002 | -0.012, 0.007 | -0.48 | 0.631        | 0.928 |
| CinguloOpercularDefault               | 0.002  | -0.005, 0.009 | 0.51  | 0.610        | 0.928 |
| CinguloOpercularDorsalAttention       | 0.006  | 0, 0.012      | 1.94  | 0.053        | 0.559 |
| CinguloOpercularFrontoParietal        | 0.002  | -0.004, 0.008 | 0.78  | 0.438        | 0.885 |
| CinguloOpercularRetrosplenialTemporal | 0.002  | -0.007, 0.011 | 0.43  | 0.664        | 0.928 |
| CinguloOpercularSensorimotorHand      | 0.008  | 0.001, 0.014  | 2.21  | <b>0.028</b> | 0.458 |
| CinguloOpercularSensorimotorMouth     | 0.004  | -0.005, 0.013 | 0.88  | 0.377        | 0.835 |
| CinguloOpercularSalience              | 0.001  | -0.008, 0.011 | 0.25  | 0.804        | 0.962 |
| CinguloOpercularVentralAttention      | 0.001  | -0.006, 0.008 | 0.32  | 0.747        | 0.956 |
| CinguloOpercularVisual                | -0.004 | -0.012, 0.004 | -1.00 | 0.320        | 0.815 |
| CinguloParietalDefault                | 0.001  | -0.009, 0.01  | 0.13  | 0.900        | 0.979 |
| CinguloParietalDorsalAttention        | 0.001  | -0.01, 0.011  | 0.12  | 0.906        | 0.980 |
| CinguloParietalFrontoParietal         | -0.009 | -0.018, 0.001 | -1.86 | 0.063        | 0.570 |
| CinguloParietalRetrosplenialTemporal  | -0.003 | -0.017, 0.011 | -0.47 | 0.642        | 0.928 |
| CinguloParietalSensorimotorHand       | -0.003 | -0.013, 0.007 | -0.59 | 0.553        | 0.928 |
| CinguloParietalSensorimotorMouth      | 0.002  | -0.012, 0.016 | 0.30  | 0.763        | 0.956 |
| CinguloParietalSalience               | -0.002 | -0.015, 0.012 | -0.24 | 0.812        | 0.962 |
| CinguloParietalVentralAttention       | -0.004 | -0.014, 0.005 | -0.86 | 0.390        | 0.853 |
| CinguloParietalVisual                 | 0.003  | -0.01, 0.015  | 0.46  | 0.644        | 0.928 |
| DefaultDorsalAttention                | 0.004  | -0.003, 0.011 | 1.09  | 0.277        | 0.815 |
| DefaultFrontoParietal                 | 0.003  | -0.002, 0.009 | 1.20  | 0.229        | 0.782 |
| DefaultRetrosplenialTemporal          | -0.002 | -0.01, 0.005  | -0.61 | 0.543        | 0.928 |
| DefaultSensorimotorHand               | -0.002 | -0.009, 0.004 | -0.76 | 0.450        | 0.885 |
| DefaultSensorimotorMouth              | -0.001 | -0.009, 0.007 | -0.24 | 0.812        | 0.962 |
| DefaultSalience                       | 0.004  | -0.005, 0.013 | 0.97  | 0.335        | 0.815 |
| DefaultVentralAttention               | 0.001  | -0.005, 0.007 | 0.40  | 0.687        | 0.943 |
| DefaultVisual                         | -0.006 | -0.013, 0.001 | -1.77 | 0.077        | 0.596 |
| DorsalAttentionFrontoParietal         | -0.003 | -0.008, 0.003 | -0.94 | 0.350        | 0.817 |
| DorsalAttentionRetrosplenialTemporal  | 0.000  | -0.007, 0.008 | 0.09  | 0.926        | 0.991 |
| DorsalAttentionSensorimotorHand       | 0.004  | -0.002, 0.009 | 1.26  | 0.208        | 0.782 |

**eTable 9. Differences in functional connectivity between the never-suicidal group and the caregiver-reported suicidality group: Welch's t-test**

| rs-fMRI indices                        | Mean   | 95%CI          | t     | p (unc)      | p FDR |
|----------------------------------------|--------|----------------|-------|--------------|-------|
| DorsalAttentionSensorimotorMouth       | 0.008  | 0, 0.016       | 2.05  | <b>0.041</b> | 0.512 |
| DorsalAttentionSalience                | -0.001 | -0.009, 0.008  | -0.19 | 0.851        | 0.966 |
| DorsalAttentionVentralAttention        | 0.002  | -0.004, 0.008  | 0.64  | 0.525        | 0.928 |
| DorsalAttentionVisual                  | -0.002 | -0.009, 0.005  | -0.57 | 0.567        | 0.928 |
| FrontoParietalRetrosplenialTemporal    | 0.000  | -0.007, 0.007  | -0.08 | 0.936        | 0.991 |
| FrontoParietalSensorimotorHand         | -0.003 | -0.009, 0.003  | -0.89 | 0.372        | 0.834 |
| FrontoParietalSensorimotorMouth        | 0.000  | -0.007, 0.008  | 0.08  | 0.934        | 0.991 |
| FrontoParietalSalience                 | 0.007  | -0.001, 0.015  | 1.79  | 0.074        | 0.596 |
| FrontoParietalVentralAttention         | 0.001  | -0.004, 0.007  | 0.52  | 0.605        | 0.928 |
| FrontoParietalVisual                   | -0.008 | -0.014, -0.001 | -2.43 | <b>0.016</b> | 0.458 |
| RetrosplenialTemporalSensorimotorHand  | 0.001  | -0.007, 0.008  | 0.15  | 0.880        | 0.972 |
| RetrosplenialTemporalSensorimotorMouth | 0.002  | -0.009, 0.013  | 0.38  | 0.701        | 0.943 |
| RetrosplenialTemporalSalience          | -0.014 | -0.026, -0.002 | -2.21 | <b>0.028</b> | 0.458 |
| RetrosplenialTemporalVentralAttention  | 0.000  | -0.009, 0.008  | -0.04 | 0.966        | 0.994 |
| RetrosplenialTemporalVisual            | 0.000  | -0.01, 0.01    | -0.06 | 0.949        | 0.994 |
| SensorimotorHandSensorimotorMouth      | 0.011  | 0, 0.023       | 1.95  | 0.052        | 0.559 |
| SensorimotorHandSalience               | 0.002  | -0.006, 0.011  | 0.48  | 0.632        | 0.928 |
| SensorimotorHandVentralAttention       | 0.003  | -0.003, 0.009  | 1.06  | 0.288        | 0.815 |
| SensorimotorHandVisual                 | 0.006  | -0.001, 0.014  | 1.61  | 0.109        | 0.653 |
| SensorimotorMouthSalience              | -0.007 | -0.018, 0.004  | -1.25 | 0.213        | 0.782 |
| SensorimotorMouthVentralAttention      | -0.001 | -0.008, 0.007  | -0.12 | 0.902        | 0.979 |
| SensorimotorMouthVisual                | -0.002 | -0.013, 0.008  | -0.44 | 0.661        | 0.928 |
| SalienceVentralAttention               | 0.007  | -0.002, 0.016  | 1.56  | 0.119        | 0.653 |
| SalienceVisual                         | -0.006 | -0.015, 0.004  | -1.13 | 0.261        | 0.807 |
| VentralAttentionVisual                 | -0.003 | -0.01, 0.005   | -0.72 | 0.469        | 0.892 |

**Bold** denotes group differences at p<0.05 uncorrected

**eTable 10. Differences in functional connectivity between the never-suicidal group and the concordantly-reported suicidality group: Welch's t-test**

| rs-fMRI indices              | Mean   | 95%CI         | t     | p (unc) | p FDR |
|------------------------------|--------|---------------|-------|---------|-------|
| AuditoryLeftCerebellumCortex | 0.020  | -0.003, 0.042 | 1.70  | 0.092   | 0.992 |
| AuditoryLeftThalamusProper   | 0.004  | -0.019, 0.027 | 0.35  | 0.729   | 0.992 |
| AuditoryLeftCaudate          | -0.017 | -0.049, 0.016 | -1.00 | 0.319   | 0.992 |
| AuditoryLeftPutamen          | -0.004 | -0.027, 0.019 | -0.36 | 0.720   | 0.992 |
| AuditoryLeftPallidum         | -0.009 | -0.027, 0.008 | -1.05 | 0.296   | 0.992 |
| AuditoryBrainStem            | -0.002 | -0.024, 0.02  | -0.17 | 0.865   | 0.992 |
| AuditoryLeftHippocampus      | 0.007  | -0.005, 0.019 | 1.21  | 0.228   | 0.992 |
| AuditoryLeftAmygdala         | 0.006  | -0.019, 0.031 | 0.50  | 0.620   | 0.992 |
| AuditoryLeftAccumbensArea    | -0.002 | -0.025, 0.02  | -0.21 | 0.831   | 0.992 |
| AuditoryLeftVentraldc        | -0.003 | -0.032, 0.027 | -0.18 | 0.860   | 0.992 |

**eTable 10. Differences in functional connectivity between the never-suicidal group and the concordantly-reported suicidality group: Welch's t-test**

| rs-fMRI indices                       | Mean   | 95%CI         | t     | p (unc) | p FDR |
|---------------------------------------|--------|---------------|-------|---------|-------|
| AuditoryRightCerebellumCortex         | 0.004  | -0.028, 0.036 | 0.25  | 0.801   | 0.992 |
| AuditoryRightThalamusProper           | 0.011  | -0.011, 0.032 | 0.97  | 0.334   | 0.992 |
| AuditoryRightCaudate                  | -0.002 | -0.029, 0.025 | -0.15 | 0.878   | 0.992 |
| AuditoryRightPutamen                  | -0.002 | -0.026, 0.022 | -0.17 | 0.867   | 0.992 |
| AuditoryRightPallidum                 | 0.000  | -0.024, 0.025 | 0.03  | 0.977   | 0.992 |
| AuditoryRightHippocampus              | 0.024  | -0.009, 0.057 | 1.44  | 0.153   | 0.992 |
| AuditoryRightAmygdala                 | 0.003  | -0.016, 0.022 | 0.33  | 0.743   | 0.992 |
| AuditoryRightAccumbensArea            | 0.010  | -0.008, 0.028 | 1.09  | 0.278   | 0.992 |
| AuditoryRightVentraldc                | -0.001 | -0.019, 0.018 | -0.05 | 0.961   | 0.992 |
| CinguloOpercularLeftCerebellumCortex  | 0.004  | -0.006, 0.014 | 0.82  | 0.414   | 0.992 |
| CinguloOpercularLeftThalamusProper    | -0.022 | -0.05, 0.006  | -1.54 | 0.127   | 0.992 |
| CinguloOpercularLeftCaudate           | -0.003 | -0.029, 0.023 | -0.22 | 0.823   | 0.992 |
| CinguloOpercularLeftPutamen           | -0.019 | -0.054, 0.016 | -1.08 | 0.284   | 0.992 |
| CinguloOpercularLeftPallidum          | -0.015 | -0.042, 0.012 | -1.13 | 0.263   | 0.992 |
| CinguloOpercularBrainStem             | 0.012  | -0.009, 0.034 | 1.12  | 0.267   | 0.992 |
| CinguloOpercularLeftHippocampus       | 0.001  | -0.025, 0.026 | 0.05  | 0.958   | 0.992 |
| CinguloOpercularLeftAmygdala          | 0.021  | -0.002, 0.043 | 1.86  | 0.067   | 0.992 |
| CinguloOpercularLeftAccumbensArea     | -0.007 | -0.029, 0.016 | -0.60 | 0.553   | 0.992 |
| CinguloOpercularLeftVentraldc         | 0.001  | -0.03, 0.032  | 0.04  | 0.965   | 0.992 |
| CinguloOpercularRightCerebellumCortex | 0.001  | -0.019, 0.022 | 0.14  | 0.887   | 0.992 |
| CinguloOpercularRightThalamusProper   | -0.004 | -0.022, 0.013 | -0.49 | 0.629   | 0.992 |
| CinguloOpercularRightCaudate          | -0.006 | -0.024, 0.013 | -0.59 | 0.559   | 0.992 |
| CinguloOpercularRightPutamen          | -0.001 | -0.012, 0.01  | -0.21 | 0.838   | 0.992 |
| CinguloOpercularRightPallidum         | -0.001 | -0.028, 0.026 | -0.08 | 0.940   | 0.992 |
| CinguloOpercularRightHippocampus      | 0.010  | -0.012, 0.031 | 0.89  | 0.377   | 0.992 |
| CinguloOpercularRightAmygdala         | 0.012  | -0.019, 0.042 | 0.77  | 0.446   | 0.992 |
| CinguloOpercularRightAccumbensArea    | 0.003  | -0.025, 0.031 | 0.20  | 0.842   | 0.992 |
| CinguloOpercularRightVentraldc        | 0.011  | -0.011, 0.033 | 0.99  | 0.325   | 0.992 |
| CinguloParietalLeftCerebellumCortex   | -0.012 | -0.037, 0.014 | -0.90 | 0.370   | 0.992 |
| CinguloParietalLeftThalamusProper     | 0.018  | -0.009, 0.044 | 1.33  | 0.186   | 0.992 |
| CinguloParietalLeftCaudate            | 0.013  | -0.009, 0.035 | 1.14  | 0.259   | 0.992 |
| CinguloParietalLeftPutamen            | 0.002  | -0.024, 0.027 | 0.13  | 0.900   | 0.992 |
| CinguloParietalLeftPallidum           | -0.007 | -0.027, 0.013 | -0.68 | 0.497   | 0.992 |
| CinguloParietalBrainStem              | 0.008  | -0.008, 0.024 | 1.02  | 0.311   | 0.992 |
| CinguloParietalLeftHippocampus        | 0.016  | -0.001, 0.033 | 1.92  | 0.058   | 0.992 |
| CinguloParietalLeftAmygdala           | -0.002 | -0.012, 0.008 | -0.40 | 0.691   | 0.992 |
| CinguloParietalLeftAccumbensArea      | -0.024 | -0.051, 0.003 | -1.74 | 0.085   | 0.992 |
| CinguloParietalLeftVentraldc          | 0.000  | -0.024, 0.024 | 0.01  | 0.995   | 0.995 |
| CinguloParietalRightCerebellumCortex  | 0.001  | -0.031, 0.033 | 0.08  | 0.934   | 0.992 |
| CinguloParietalRightThalamusProper    | 0.009  | -0.02, 0.038  | 0.63  | 0.530   | 0.992 |
| CinguloParietalRightCaudate           | 0.002  | -0.02, 0.024  | 0.20  | 0.842   | 0.992 |
| CinguloParietalRightPutamen           | -0.003 | -0.028, 0.021 | -0.26 | 0.797   | 0.992 |

**eTable 10. Differences in functional connectivity between the never-suicidal group and the concordantly-reported suicidality group: Welch's t-test**

| rs-fMRI indices                      | Mean   | 95%CI          | t     | p (unc)      | p FDR |
|--------------------------------------|--------|----------------|-------|--------------|-------|
| CinguloParietalRightPallidum         | 0.010  | -0.015, 0.034  | 0.77  | 0.443        | 0.992 |
| CinguloParietalRightHippocampus      | -0.002 | -0.023, 0.02   | -0.13 | 0.893        | 0.992 |
| CinguloParietalRightAmygdala         | -0.005 | -0.033, 0.023  | -0.36 | 0.722        | 0.992 |
| CinguloParietalRightAccumbensArea    | 0.001  | -0.018, 0.019  | 0.11  | 0.916        | 0.992 |
| CinguloParietalRightVentraldc        | -0.001 | -0.017, 0.015  | -0.12 | 0.904        | 0.992 |
| DefaultLeftCerebellumCortex          | 0.003  | -0.015, 0.02   | 0.29  | 0.774        | 0.992 |
| DefaultLeftThalamusProper            | 0.009  | -0.001, 0.02   | 1.77  | 0.081        | 0.992 |
| DefaultLeftCaudate                   | 0.018  | -0.007, 0.043  | 1.45  | 0.150        | 0.992 |
| DefaultLeftPutamen                   | 0.001  | -0.018, 0.021  | 0.14  | 0.888        | 0.992 |
| DefaultLeftPallidum                  | -0.004 | -0.03, 0.023   | -0.28 | 0.777        | 0.992 |
| DefaultBrainStem                     | 0.011  | -0.019, 0.042  | 0.75  | 0.454        | 0.992 |
| DefaultLeftHippocampus               | 0.012  | -0.007, 0.031  | 1.29  | 0.202        | 0.992 |
| DefaultLeftAmygdala                  | -0.007 | -0.03, 0.017   | -0.59 | 0.560        | 0.992 |
| DefaultLeftAccumbensArea             | 0.006  | -0.016, 0.028  | 0.53  | 0.600        | 0.992 |
| DefaultLeftVentraldc                 | 0.005  | -0.013, 0.024  | 0.57  | 0.570        | 0.992 |
| DefaultRightCerebellumCortex         | 0.012  | -0.02, 0.043   | 0.73  | 0.465        | 0.992 |
| DefaultRightThalamusProper           | 0.011  | -0.009, 0.03   | 1.09  | 0.277        | 0.992 |
| DefaultRightCaudate                  | -0.025 | -0.042, -0.008 | -2.91 | <b>0.005</b> | 0.711 |
| DefaultRightPutamen                  | 0.002  | -0.017, 0.022  | 0.25  | 0.804        | 0.992 |
| DefaultRightPallidum                 | 0.002  | -0.012, 0.015  | 0.24  | 0.812        | 0.992 |
| DefaultRightHippocampus              | -0.032 | -0.061, -0.003 | -2.20 | <b>0.030</b> | 0.992 |
| DefaultRightAmygdala                 | -0.004 | -0.023, 0.016  | -0.38 | 0.703        | 0.992 |
| DefaultRightAccumbensArea            | 0.011  | -0.016, 0.038  | 0.80  | 0.423        | 0.992 |
| DefaultRightVentraldc                | -0.007 | -0.036, 0.022  | -0.47 | 0.642        | 0.992 |
| DorsalAttentionLeftCerebellumCortex  | 0.025  | 0.005, 0.044   | 2.50  | <b>0.014</b> | 0.871 |
| DorsalAttentionLeftThalamusProper    | -0.006 | -0.03, 0.017   | -0.53 | 0.600        | 0.992 |
| DorsalAttentionLeftCaudate           | 0.004  | -0.017, 0.025  | 0.37  | 0.711        | 0.992 |
| DorsalAttentionLeftPutamen           | 0.000  | -0.024, 0.025  | 0.03  | 0.978        | 0.992 |
| DorsalAttentionLeftPallidum          | -0.016 | -0.049, 0.017  | -0.96 | 0.338        | 0.992 |
| DorsalAttentionBrainStem             | -0.023 | -0.043, -0.003 | -2.24 | <b>0.028</b> | 0.992 |
| DorsalAttentionLeftHippocampus       | 0.004  | -0.015, 0.023  | 0.45  | 0.653        | 0.992 |
| DorsalAttentionLeftAmygdala          | 0.000  | -0.016, 0.016  | 0.03  | 0.979        | 0.992 |
| DorsalAttentionLeftAccumbensArea     | 0.002  | -0.011, 0.014  | 0.29  | 0.769        | 0.992 |
| DorsalAttentionLeftVentraldc         | 0.000  | -0.032, 0.032  | -0.02 | 0.987        | 0.993 |
| DorsalAttentionRightCerebellumCortex | 0.015  | -0.005, 0.035  | 1.48  | 0.142        | 0.992 |
| DorsalAttentionRightThalamusProper   | 0.006  | -0.021, 0.033  | 0.43  | 0.668        | 0.992 |
| DorsalAttentionRightCaudate          | -0.022 | -0.051, 0.007  | -1.50 | 0.138        | 0.992 |
| DorsalAttentionRightPutamen          | 0.007  | -0.012, 0.026  | 0.77  | 0.441        | 0.992 |
| DorsalAttentionRightPallidum         | -0.003 | -0.023, 0.018  | -0.25 | 0.802        | 0.992 |
| DorsalAttentionRightHippocampus      | -0.010 | -0.032, 0.012  | -0.87 | 0.386        | 0.992 |
| DorsalAttentionRightAmygdala         | -0.003 | -0.023, 0.017  | -0.29 | 0.775        | 0.992 |
| DorsalAttentionRightAccumbensArea    | -0.017 | -0.043, 0.009  | -1.28 | 0.204        | 0.992 |
| DorsalAttentionRightVentraldc        | 0.001  | -0.019, 0.021  | 0.07  | 0.941        | 0.992 |

**eTable 10. Differences in functional connectivity between the never-suicidal group and the concordantly-reported suicidality group: Welch's t-test**

| rs-fMRI indices                            | Mean   | 95%CI         | t     | p (unc) | p FDR |
|--------------------------------------------|--------|---------------|-------|---------|-------|
| FrontoParietalLeftCerebellumCortex         | -0.011 | -0.026, 0.005 | -1.34 | 0.183   | 0.992 |
| FrontoParietalLeftThalamusProper           | -0.006 | -0.02, 0.008  | -0.84 | 0.401   | 0.992 |
| FrontoParietalLeftCaudate                  | 0.000  | -0.013, 0.012 | -0.03 | 0.978   | 0.992 |
| FrontoParietalLeftPutamen                  | -0.009 | -0.033, 0.015 | -0.73 | 0.469   | 0.992 |
| FrontoParietalLeftPallidum                 | 0.000  | -0.019, 0.018 | -0.05 | 0.963   | 0.992 |
| FrontoParietalBrainStem                    | 0.004  | -0.025, 0.034 | 0.30  | 0.769   | 0.992 |
| FrontoParietalLeftHippocampus              | -0.026 | -0.053, 0.001 | -1.91 | 0.060   | 0.992 |
| FrontoParietalLeftAmygdala                 | 0.011  | -0.009, 0.03  | 1.10  | 0.273   | 0.992 |
| FrontoParietalLeftAccumbensArea            | 0.004  | -0.018, 0.027 | 0.38  | 0.705   | 0.992 |
| FrontoParietalLeftVentraldc                | 0.002  | -0.02, 0.025  | 0.21  | 0.838   | 0.992 |
| FrontoParietalRightCerebellumCortex        | -0.006 | -0.026, 0.014 | -0.61 | 0.541   | 0.992 |
| FrontoParietalRightThalamusProper          | -0.007 | -0.037, 0.024 | -0.43 | 0.671   | 0.992 |
| FrontoParietalRightCaudate                 | 0.005  | -0.016, 0.026 | 0.45  | 0.650   | 0.992 |
| FrontoParietalRightPutamen                 | -0.011 | -0.031, 0.009 | -1.10 | 0.275   | 0.992 |
| FrontoParietalRightPallidum                | -0.001 | -0.018, 0.015 | -0.16 | 0.872   | 0.992 |
| FrontoParietalRightHippocampus             | 0.006  | -0.006, 0.018 | 0.99  | 0.325   | 0.992 |
| FrontoParietalRightAmygdala                | -0.005 | -0.03, 0.02   | -0.42 | 0.675   | 0.992 |
| FrontoParietalRightAccumbensArea           | -0.006 | -0.025, 0.013 | -0.66 | 0.512   | 0.992 |
| FrontoParietalRightVentraldc               | -0.002 | -0.028, 0.023 | -0.17 | 0.862   | 0.992 |
| RetrosplenialTemporalLeftCerebellumCortex  | 0.005  | -0.019, 0.028 | 0.40  | 0.688   | 0.992 |
| RetrosplenialTemporalLeftThalamusProper    | -0.011 | -0.032, 0.01  | -1.01 | 0.314   | 0.992 |
| RetrosplenialTemporalLeftCaudate           | -0.008 | -0.03, 0.013  | -0.76 | 0.451   | 0.992 |
| RetrosplenialTemporalLeftPutamen           | -0.003 | -0.016, 0.009 | -0.53 | 0.598   | 0.992 |
| RetrosplenialTemporalLeftPallidum          | 0.014  | -0.012, 0.04  | 1.10  | 0.274   | 0.992 |
| RetrosplenialTemporalBrainStem             | -0.008 | -0.031, 0.015 | -0.67 | 0.507   | 0.992 |
| RetrosplenialTemporalLeftHippocampus       | 0.008  | -0.021, 0.037 | 0.55  | 0.584   | 0.992 |
| RetrosplenialTemporalLeftAmygdala          | 0.004  | -0.025, 0.033 | 0.26  | 0.792   | 0.992 |
| RetrosplenialTemporalLeftAccumbensArea     | 0.003  | -0.019, 0.025 | 0.27  | 0.785   | 0.992 |
| RetrosplenialTemporalLeftVentraldc         | 0.007  | -0.02, 0.034  | 0.53  | 0.595   | 0.992 |
| RetrosplenialTemporalRightCerebellumCortex | 0.001  | -0.027, 0.029 | 0.09  | 0.926   | 0.992 |
| RetrosplenialTemporalRightThalamusProper   | 0.005  | -0.017, 0.027 | 0.41  | 0.680   | 0.992 |
| RetrosplenialTemporalRightCaudate          | 0.008  | -0.027, 0.044 | 0.47  | 0.640   | 0.992 |
| RetrosplenialTemporalRightPutamen          | -0.011 | -0.031, 0.009 | -1.06 | 0.292   | 0.992 |
| RetrosplenialTemporalRightPallidum         | 0.005  | -0.012, 0.021 | 0.56  | 0.578   | 0.992 |
| RetrosplenialTemporalRightHippocampus      | -0.005 | -0.022, 0.012 | -0.57 | 0.570   | 0.992 |
| RetrosplenialTemporalRightAmygdala         | 0.007  | -0.004, 0.017 | 1.27  | 0.207   | 0.992 |
| RetrosplenialTemporalRightAccumbensArea    | -0.025 | -0.05, 0.001  | -1.94 | 0.056   | 0.992 |
| RetrosplenialTemporalRightVentraldc        | 0.006  | -0.022, 0.033 | 0.40  | 0.690   | 0.992 |
| SensorimotorHandLeftCerebellumCortex       | -0.013 | -0.043, 0.017 | -0.84 | 0.404   | 0.992 |
| SensorimotorHandLeftThalamusProper         | 0.001  | -0.028, 0.029 | 0.03  | 0.974   | 0.992 |
| SensorimotorHandLeftCaudate                | 0.017  | -0.003, 0.037 | 1.65  | 0.102   | 0.992 |
| SensorimotorHandLeftPutamen                | 0.005  | -0.017, 0.028 | 0.45  | 0.656   | 0.992 |

**eTable 10. Differences in functional connectivity between the never-suicidal group and the concordantly-reported suicidality group: Welch's t-test**

| rs-fMRI indices                        | Mean   | 95%CI          | t     | p (unc)      | p FDR |
|----------------------------------------|--------|----------------|-------|--------------|-------|
| SensorimotorHandLeftPallidum           | 0.010  | -0.016, 0.036  | 0.74  | 0.460        | 0.992 |
| SensorimotorHandBrainStem              | 0.008  | -0.014, 0.029  | 0.71  | 0.477        | 0.992 |
| SensorimotorHandLeftHippocampus        | 0.021  | -0.012, 0.055  | 1.26  | 0.211        | 0.992 |
| SensorimotorHandLeftAmygdala           | -0.007 | -0.028, 0.014  | -0.67 | 0.504        | 0.992 |
| SensorimotorHandLeftAccumbensArea      | 0.006  | -0.013, 0.025  | 0.65  | 0.518        | 0.992 |
| SensorimotorHandLeftVentraldc          | -0.005 | -0.024, 0.014  | -0.57 | 0.573        | 0.992 |
| SensorimotorHandRightCerebellumCortex  | -0.008 | -0.02, 0.004   | -1.27 | 0.206        | 0.992 |
| SensorimotorHandRightThalamusProper    | -0.015 | -0.04, 0.01    | -1.20 | 0.235        | 0.992 |
| SensorimotorHandRightCaudate           | 0.009  | -0.014, 0.032  | 0.78  | 0.435        | 0.992 |
| SensorimotorHandRightPutamen           | -0.003 | -0.036, 0.029  | -0.20 | 0.838        | 0.992 |
| SensorimotorHandRightPallidum          | 0.014  | -0.011, 0.039  | 1.11  | 0.270        | 0.992 |
| SensorimotorHandRightHippocampus       | 0.002  | -0.021, 0.025  | 0.17  | 0.868        | 0.992 |
| SensorimotorHandRightAmygdala          | 0.013  | -0.012, 0.038  | 1.01  | 0.316        | 0.992 |
| SensorimotorHandRightAccumbensArea     | 0.008  | -0.017, 0.033  | 0.64  | 0.526        | 0.992 |
| SensorimotorHandRightVentraldc         | 0.018  | -0.004, 0.04   | 1.61  | 0.112        | 0.992 |
| SensorimotorMouthLeftCerebellumCortex  | 0.008  | -0.019, 0.036  | 0.60  | 0.553        | 0.992 |
| SensorimotorMouthLeftThalamusProper    | -0.007 | -0.028, 0.015  | -0.61 | 0.542        | 0.992 |
| SensorimotorMouthLeftCaudate           | 0.006  | -0.011, 0.021  | 0.68  | 0.497        | 0.992 |
| SensorimotorMouthLeftPutamen           | 0.010  | -0.007, 0.027  | 1.16  | 0.248        | 0.992 |
| SensorimotorMouthLeftPallidum          | -0.001 | -0.012, 0.01   | -0.19 | 0.847        | 0.992 |
| SensorimotorMouthBrainStem             | -0.009 | -0.036, 0.017  | -0.70 | 0.485        | 0.992 |
| SensorimotorMouthLeftHippocampus       | -0.001 | -0.023, 0.022  | -0.05 | 0.958        | 0.992 |
| SensorimotorMouthLeftAmygdala          | -0.008 | -0.039, 0.022  | -0.55 | 0.583        | 0.992 |
| SensorimotorMouthLeftAccumbensArea     | 0.021  | -0.008, 0.05   | 1.41  | 0.161        | 0.992 |
| SensorimotorMouthLeftVentraldc         | 0.008  | -0.012, 0.028  | 0.78  | 0.435        | 0.992 |
| SensorimotorMouthRightCerebellumCortex | -0.012 | -0.035, 0.011  | -1.06 | 0.293        | 0.992 |
| SensorimotorMouthRightThalamusProper   | 0.004  | -0.02, 0.029   | 0.34  | 0.732        | 0.992 |
| SensorimotorMouthRightCaudate          | 0.011  | -0.011, 0.034  | 0.99  | 0.326        | 0.992 |
| SensorimotorMouthRightPutamen          | 0.013  | -0.013, 0.039  | 1.00  | 0.322        | 0.992 |
| SensorimotorMouthRightPallidum         | -0.012 | -0.03, 0.006   | -1.31 | 0.193        | 0.992 |
| SensorimotorMouthRightHippocampus      | 0.009  | -0.01, 0.027   | 0.94  | 0.350        | 0.992 |
| SensorimotorMouthRightAmygdala         | 0.005  | -0.01, 0.02    | 0.66  | 0.510        | 0.992 |
| SensorimotorMouthRightAccumbensArea    | -0.001 | -0.012, 0.01   | -0.16 | 0.871        | 0.992 |
| SensorimotorMouthRightVentraldc        | -0.003 | -0.03, 0.024   | -0.25 | 0.803        | 0.992 |
| SaliencLeftCerebellumCortex            | 0.001  | -0.02, 0.022   | 0.09  | 0.926        | 0.992 |
| SaliencLeftThalamusProper              | 0.002  | -0.022, 0.026  | 0.14  | 0.889        | 0.992 |
| SaliencLeftCaudate                     | 0.017  | -0.012, 0.047  | 1.17  | 0.244        | 0.992 |
| SaliencLeftPutamen                     | 0.006  | -0.012, 0.023  | 0.64  | 0.522        | 0.992 |
| SaliencLeftPallidum                    | 0.001  | -0.02, 0.022   | 0.10  | 0.923        | 0.992 |
| SaliencBrainStem                       | 0.014  | -0.007, 0.035  | 1.33  | 0.187        | 0.992 |
| SaliencLeftHippocampus                 | 0.006  | -0.014, 0.026  | 0.58  | 0.562        | 0.992 |
| SaliencLeftAmygdala                    | -0.036 | -0.069, -0.003 | -2.15 | <b>0.034</b> | 0.992 |
| SaliencLeftAccumbensArea               | -0.028 | -0.05, -0.006  | -2.56 | <b>0.012</b> | 0.871 |

**eTable 10. Differences in functional connectivity between the never-suicidal group and the concordantly-reported suicidality group: Welch's t-test**

| rs-fMRI indices                       | Mean   | 95%CI          | t     | p (unc)      | p FDR |
|---------------------------------------|--------|----------------|-------|--------------|-------|
| SaliencLeftVentraldc                  | 0.007  | -0.012, 0.026  | 0.71  | 0.478        | 0.992 |
| SaliencRightCerebellumCortex          | -0.006 | -0.022, 0.011  | -0.65 | 0.520        | 0.992 |
| SaliencRightThalamusProper            | 0.003  | -0.009, 0.015  | 0.52  | 0.603        | 0.992 |
| SaliencRightCaudate                   | 0.004  | -0.027, 0.035  | 0.26  | 0.793        | 0.992 |
| SaliencRightPutamen                   | 0.015  | -0.003, 0.033  | 1.64  | 0.104        | 0.992 |
| SaliencRightPallidum                  | 0.021  | -0.005, 0.046  | 1.62  | 0.109        | 0.992 |
| SaliencRightHippocampus               | -0.031 | -0.059, -0.003 | -2.16 | <b>0.033</b> | 0.992 |
| SaliencRightAmygdala                  | 0.000  | -0.018, 0.019  | 0.02  | 0.985        | 0.993 |
| SaliencRightAccumbensArea             | 0.006  | -0.017, 0.029  | 0.49  | 0.627        | 0.992 |
| SaliencRightVentraldc                 | -0.005 | -0.025, 0.016  | -0.43 | 0.670        | 0.992 |
| VentralAttentionLeftCerebellumCortex  | -0.005 | -0.027, 0.016  | -0.50 | 0.619        | 0.992 |
| VentralAttentionLeftThalamusProper    | -0.021 | -0.052, 0.01   | -1.38 | 0.172        | 0.992 |
| VentralAttentionLeftCaudate           | -0.008 | -0.029, 0.013  | -0.76 | 0.451        | 0.992 |
| VentralAttentionLeftPutamen           | -0.012 | -0.03, 0.005   | -1.40 | 0.166        | 0.992 |
| VentralAttentionLeftPallidum          | 0.000  | -0.015, 0.016  | 0.03  | 0.976        | 0.992 |
| VentralAttentionBrainStem             | -0.006 | -0.02, 0.008   | -0.83 | 0.410        | 0.992 |
| VentralAttentionLeftHippocampus       | -0.018 | -0.048, 0.012  | -1.19 | 0.239        | 0.992 |
| VentralAttentionLeftAmygdala          | -0.001 | -0.021, 0.019  | -0.11 | 0.914        | 0.992 |
| VentralAttentionLeftAccumbensArea     | 0.010  | -0.019, 0.039  | 0.68  | 0.500        | 0.992 |
| VentralAttentionLeftVentraldc         | -0.004 | -0.032, 0.025  | -0.26 | 0.795        | 0.992 |
| VentralAttentionRightCerebellumCortex | -0.003 | -0.02, 0.015   | -0.27 | 0.784        | 0.992 |
| VentralAttentionRightThalamusProper   | 0.014  | -0.009, 0.036  | 1.24  | 0.220        | 0.992 |
| VentralAttentionRightCaudate          | 0.006  | -0.017, 0.028  | 0.49  | 0.624        | 0.992 |
| VentralAttentionRightPutamen          | 0.002  | -0.016, 0.02   | 0.21  | 0.836        | 0.992 |
| VentralAttentionRightPallidum         | -0.007 | -0.036, 0.022  | -0.47 | 0.636        | 0.992 |
| VentralAttentionRightHippocampus      | -0.002 | -0.022, 0.018  | -0.23 | 0.816        | 0.992 |
| VentralAttentionRightAmygdala         | -0.013 | -0.03, 0.003   | -1.61 | 0.112        | 0.992 |
| VentralAttentionRightAccumbensArea    | -0.017 | -0.032, -0.001 | -2.16 | <b>0.033</b> | 0.992 |
| VentralAttentionRightVentraldc        | -0.005 | -0.016, 0.006  | -0.87 | 0.386        | 0.992 |
| VisualLeftCerebellumCortex            | 0.008  | -0.018, 0.034  | 0.60  | 0.551        | 0.992 |
| VisualLeftThalamusProper              | 0.003  | -0.014, 0.02   | 0.34  | 0.736        | 0.992 |
| VisualLeftCaudate                     | 0.027  | 0.001, 0.053   | 2.04  | <b>0.044</b> | 0.992 |
| VisualLeftPutamen                     | 0.000  | -0.027, 0.027  | 0.01  | 0.990        | 0.993 |
| VisualLeftPallidum                    | 0.005  | -0.012, 0.022  | 0.54  | 0.589        | 0.992 |
| VisualBrainStem                       | 0.002  | -0.02, 0.023   | 0.14  | 0.892        | 0.992 |
| VisualLeftHippocampus                 | -0.001 | -0.024, 0.023  | -0.04 | 0.968        | 0.992 |
| VisualLeftAmygdala                    | -0.003 | -0.025, 0.019  | -0.28 | 0.779        | 0.992 |
| VisualLeftAccumbensArea               | 0.004  | -0.025, 0.033  | 0.25  | 0.805        | 0.992 |
| VisualLeftVentraldc                   | -0.017 | -0.037, 0.004  | -1.61 | 0.110        | 0.992 |
| VisualRightCerebellumCortex           | -0.012 | -0.027, 0.004  | -1.52 | 0.132        | 0.992 |
| VisualRightThalamusProper             | -0.008 | -0.025, 0.01   | -0.88 | 0.382        | 0.992 |
| VisualRightCaudate                    | -0.001 | -0.013, 0.01   | -0.22 | 0.823        | 0.992 |

**eTable 10. Differences in functional connectivity between the never-suicidal group and the concordantly-reported suicidality group: Welch's t-test**

| rs-fMRI indices                       | Mean   | 95%CI         | t     | p (unc)      | p FDR |
|---------------------------------------|--------|---------------|-------|--------------|-------|
| VisualRightPutamen                    | -0.008 | -0.035, 0.019 | -0.59 | 0.556        | 0.992 |
| VisualRightPallidum                   | 0.010  | -0.012, 0.031 | 0.89  | 0.375        | 0.992 |
| VisualRightHippocampus                | -0.005 | -0.033, 0.024 | -0.33 | 0.743        | 0.992 |
| VisualRightAmygdala                   | -0.020 | -0.051, 0.011 | -1.27 | 0.207        | 0.992 |
| VisualRightAccumbensArea              | 0.011  | -0.008, 0.029 | 1.14  | 0.255        | 0.992 |
| VisualRightVentraldc                  | 0.012  | -0.011, 0.036 | 1.06  | 0.292        | 0.992 |
| WithinAuditory                        | 0.002  | -0.016, 0.02  | 0.27  | 0.788        | 0.992 |
| WithinCinguloOpercula                 | 0.005  | -0.012, 0.022 | 0.62  | 0.538        | 0.992 |
| WithinCinguloParietal                 | 0.020  | -0.029, 0.068 | 0.81  | 0.421        | 0.992 |
| WithinDefault                         | 0.008  | -0.007, 0.024 | 1.04  | 0.301        | 0.992 |
| WithinDorsalAttention                 | 0.007  | -0.007, 0.02  | 0.95  | 0.344        | 0.992 |
| WithinFrontoParietal                  | 0.009  | -0.005, 0.022 | 1.33  | 0.187        | 0.992 |
| WithinRetrosplenialTemporal           | 0.013  | -0.013, 0.039 | 0.97  | 0.335        | 0.992 |
| WithinSensorimotorHand                | 0.008  | -0.009, 0.024 | 0.89  | 0.375        | 0.992 |
| WithinSensorimotorMouth               | -0.007 | -0.041, 0.027 | -0.39 | 0.699        | 0.992 |
| WithinSalience                        | -0.007 | -0.04, 0.026  | -0.43 | 0.670        | 0.992 |
| WithinVentralAttention                | -0.004 | -0.018, 0.011 | -0.51 | 0.614        | 0.992 |
| WithinVisual                          | -0.009 | -0.029, 0.012 | -0.83 | 0.406        | 0.992 |
| AuditoryCinguloOpercular              | 0.003  | -0.012, 0.017 | 0.36  | 0.723        | 0.992 |
| AuditoryCinguloParietal               | 0.011  | -0.007, 0.029 | 1.24  | 0.217        | 0.992 |
| AuditoryDefault                       | -0.001 | -0.013, 0.011 | -0.18 | 0.860        | 0.992 |
| AuditoryDorsalAttention               | 0.001  | -0.01, 0.01   | 0.10  | 0.924        | 0.992 |
| AuditoryFrontoParietal                | 0.005  | -0.006, 0.016 | 0.92  | 0.358        | 0.992 |
| AuditoryRetrosplenialTemporal         | -0.013 | -0.027, 0.002 | -1.75 | 0.083        | 0.992 |
| AuditorySensorimotorHand              | 0.006  | -0.007, 0.019 | 0.96  | 0.341        | 0.992 |
| AuditorySensorimotorMouth             | 0.001  | -0.02, 0.02   | 0.05  | 0.963        | 0.992 |
| AuditorySalience                      | -0.006 | -0.023, 0.011 | -0.74 | 0.462        | 0.992 |
| AuditoryVentralAttention              | 0.005  | -0.007, 0.017 | 0.82  | 0.412        | 0.992 |
| AuditoryVisual                        | -0.002 | -0.017, 0.013 | -0.27 | 0.788        | 0.992 |
| CinguloOpercularCinguloParietal       | 0.005  | -0.01, 0.021  | 0.68  | 0.501        | 0.992 |
| CinguloOpercularDefault               | -0.006 | -0.019, 0.008 | -0.84 | 0.405        | 0.992 |
| CinguloOpercularDorsalAttention       | 0.010  | 0, 0.02       | 2.00  | <b>0.048</b> | 0.992 |
| CinguloOpercularFrontoParietal        | -0.005 | -0.017, 0.006 | -0.92 | 0.360        | 0.992 |
| CinguloOpercularRetrosplenialTemporal | -0.002 | -0.018, 0.014 | -0.23 | 0.817        | 0.992 |
| CinguloOpercularSensorimotorHand      | 0.009  | -0.002, 0.02  | 1.71  | 0.090        | 0.992 |
| CinguloOpercularSensorimotorMouth     | 0.000  | -0.018, 0.018 | -0.03 | 0.979        | 0.992 |
| CinguloOpercularSalience              | 0.000  | -0.016, 0.017 | 0.03  | 0.975        | 0.992 |
| CinguloOpercularVentralAttention      | 0.003  | -0.009, 0.015 | 0.50  | 0.616        | 0.992 |
| CinguloOpercularVisual                | -0.008 | -0.021, 0.005 | -1.24 | 0.219        | 0.992 |
| CinguloParietalDefault                | -0.003 | -0.021, 0.016 | -0.27 | 0.785        | 0.992 |
| CinguloParietalDorsalAttention        | 0.005  | -0.012, 0.021 | 0.55  | 0.585        | 0.992 |
| CinguloParietalFrontoParietal         | -0.016 | -0.032, 0     | -1.94 | 0.056        | 0.992 |
| CinguloParietalRetrosplenialTemporal  | -0.002 | -0.027, 0.022 | -0.18 | 0.859        | 0.992 |



**eTable 10. Differences in functional connectivity between the never-suicidal group and the concordantly-reported suicidality group: Welch's t-test**

| rs-fMRI indices                        | Mean   | 95%CI          | t     | p (unc)      | p FDR |
|----------------------------------------|--------|----------------|-------|--------------|-------|
| CinguloParietalSensorimotorHand        | 0.005  | -0.012, 0.022  | 0.55  | 0.582        | 0.992 |
| CinguloParietalSensorimotorMouth       | 0.007  | -0.018, 0.032  | 0.54  | 0.594        | 0.992 |
| CinguloParietalSalience                | -0.001 | -0.025, 0.024  | -0.04 | 0.966        | 0.992 |
| CinguloParietalVentralAttention        | -0.004 | -0.019, 0.011  | -0.50 | 0.621        | 0.992 |
| CinguloParietalVisual                  | 0.001  | -0.019, 0.022  | 0.13  | 0.895        | 0.992 |
| DefaultDorsalAttention                 | -0.006 | -0.018, 0.005  | -1.11 | 0.270        | 0.992 |
| DefaultFrontoParietal                  | 0.002  | -0.007, 0.011  | 0.44  | 0.664        | 0.992 |
| DefaultRetrosplenialTemporal           | 0.000  | -0.015, 0.014  | -0.05 | 0.962        | 0.992 |
| DefaultSensorimotorHand                | -0.009 | -0.021, 0.002  | -1.59 | 0.115        | 0.992 |
| DefaultSensorimotorMouth               | 0.017  | 0.004, 0.03    | 2.63  | <b>0.010</b> | 0.871 |
| DefaultSalience                        | 0.002  | -0.013, 0.017  | 0.29  | 0.776        | 0.992 |
| DefaultVentralAttention                | 0.002  | -0.008, 0.013  | 0.45  | 0.652        | 0.992 |
| DefaultVisual                          | -0.003 | -0.015, 0.009  | -0.48 | 0.636        | 0.992 |
| DorsalAttentionFrontoParietal          | -0.003 | -0.013, 0.007  | -0.52 | 0.602        | 0.992 |
| DorsalAttentionRetrosplenialTemporal   | 0.003  | -0.012, 0.017  | 0.36  | 0.718        | 0.992 |
| DorsalAttentionSensorimotorHand        | 0.007  | -0.002, 0.015  | 1.59  | 0.116        | 0.992 |
| DorsalAttentionSensorimotorMouth       | 0.000  | -0.013, 0.013  | 0.05  | 0.961        | 0.992 |
| DorsalAttentionSalience                | -0.005 | -0.017, 0.008  | -0.71 | 0.483        | 0.992 |
| DorsalAttentionVentralAttention        | -0.001 | -0.012, 0.01   | -0.15 | 0.878        | 0.992 |
| DorsalAttentionVisual                  | 0.002  | -0.01, 0.013   | 0.27  | 0.787        | 0.992 |
| FrontoParietalRetrosplenialTemporal    | 0.001  | -0.011, 0.014  | 0.22  | 0.823        | 0.992 |
| FrontoParietalSensorimotorHand         | -0.003 | -0.013, 0.008  | -0.47 | 0.642        | 0.992 |
| FrontoParietalSensorimotorMouth        | 0.006  | -0.007, 0.019  | 0.89  | 0.373        | 0.992 |
| FrontoParietalSalience                 | 0.010  | -0.004, 0.024  | 1.45  | 0.150        | 0.992 |
| FrontoParietalVentralAttention         | 0.004  | -0.005, 0.012  | 0.86  | 0.392        | 0.992 |
| FrontoParietalVisual                   | -0.008 | -0.018, 0.003  | -1.45 | 0.150        | 0.992 |
| RetrosplenialTemporalSensorimotorHand  | -0.007 | -0.02, 0.007   | -0.99 | 0.323        | 0.992 |
| RetrosplenialTemporalSensorimotorMouth | -0.006 | -0.025, 0.013  | -0.61 | 0.544        | 0.992 |
| RetrosplenialTemporalSalience          | -0.014 | -0.033, 0.006  | -1.38 | 0.172        | 0.992 |
| RetrosplenialTemporalVentralAttention  | 0.001  | -0.014, 0.016  | 0.14  | 0.887        | 0.992 |
| RetrosplenialTemporalVisual            | -0.010 | -0.027, 0.007  | -1.13 | 0.260        | 0.992 |
| SensorimotorHandSensorimotorMouth      | 0.018  | -0.001, 0.037  | 1.87  | 0.064        | 0.992 |
| SensorimotorHandSalience               | 0.006  | -0.009, 0.021  | 0.80  | 0.424        | 0.992 |
| SensorimotorHandVentralAttention       | 0.006  | -0.003, 0.015  | 1.33  | 0.188        | 0.992 |
| SensorimotorHandVisual                 | 0.008  | -0.006, 0.022  | 1.09  | 0.278        | 0.992 |
| SensorimotorMouthSalience              | -0.002 | -0.02, 0.016   | -0.24 | 0.811        | 0.992 |
| SensorimotorMouthVentralAttention      | 0.004  | -0.009, 0.017  | 0.56  | 0.576        | 0.992 |
| SensorimotorMouthVisual                | -0.028 | -0.045, -0.011 | -3.19 | <b>0.002</b> | 0.598 |
| SalienceVentralAttention               | 0.004  | -0.008, 0.016  | 0.64  | 0.524        | 0.992 |
| SalienceVisual                         | -0.014 | -0.029, 0.001  | -1.91 | 0.059        | 0.992 |
| VentralAttentionVisual                 | -0.009 | -0.02, 0.002   | -1.62 | 0.108        | 0.992 |

**Bold** denotes group differences at p<0.05 uncorrected

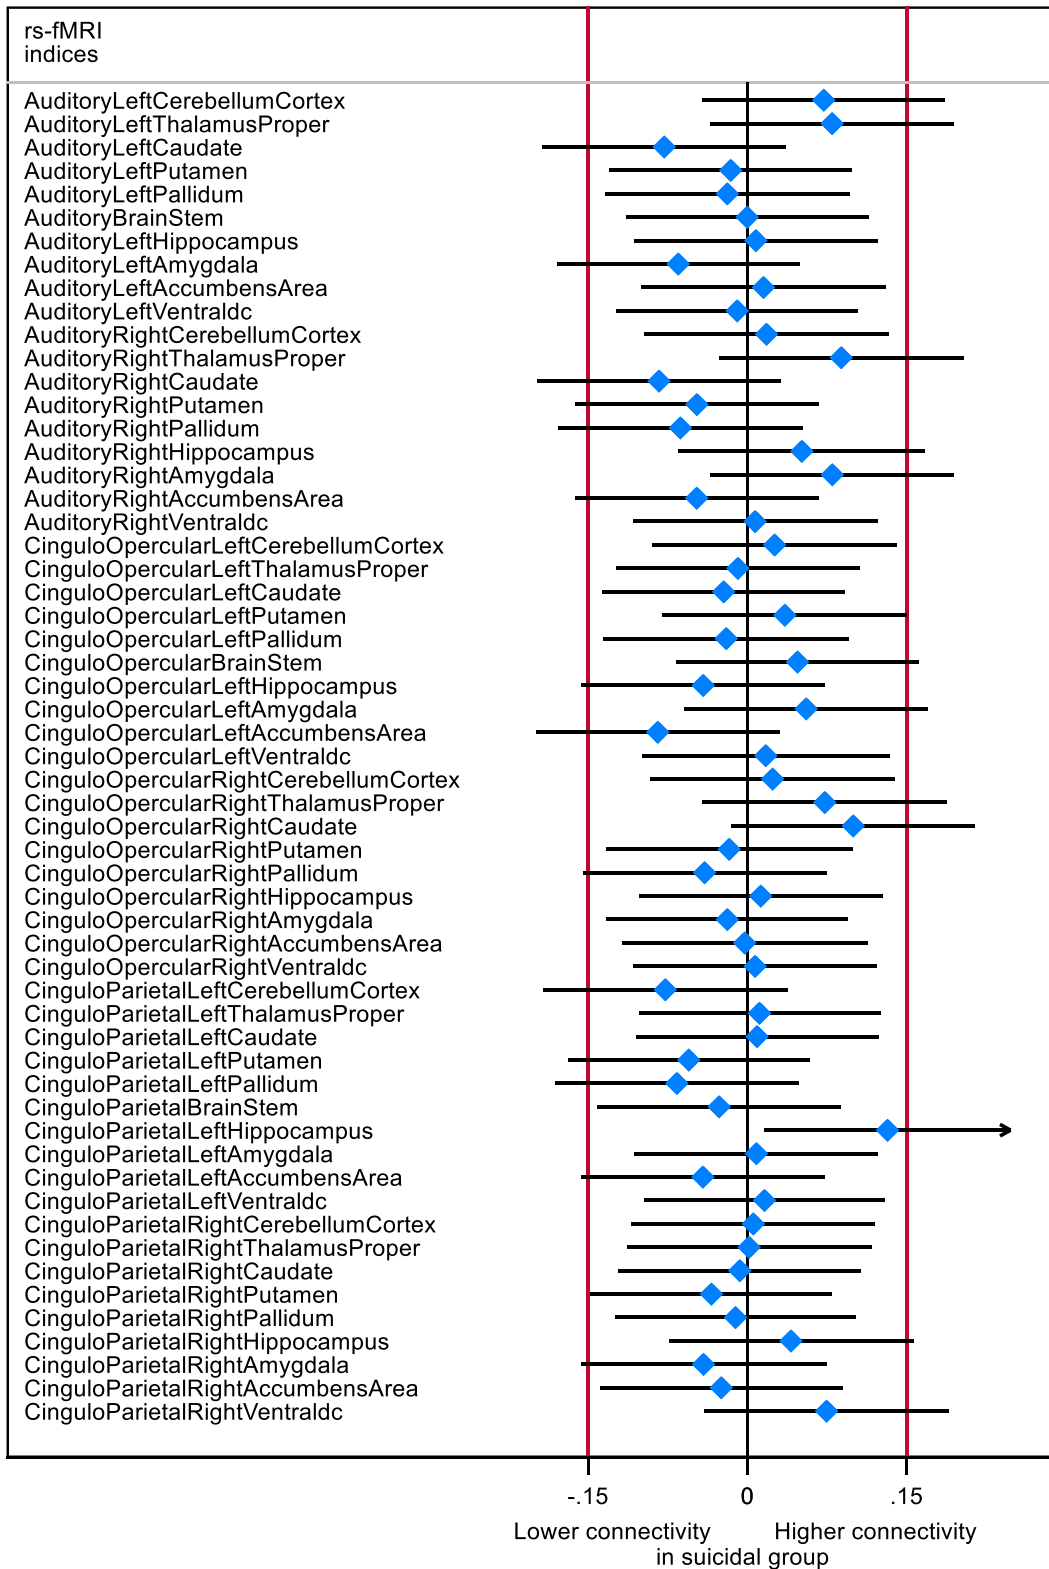

**eFigure 8 (1 of 6).** Results of the Equivalence test for differences in connectivity between the never-suicidal group and the child-reported suicidality group. The figure shows the effect sizes and 95% confidence intervals of the difference against the interval of equivalence (-0.15 to 0.15).

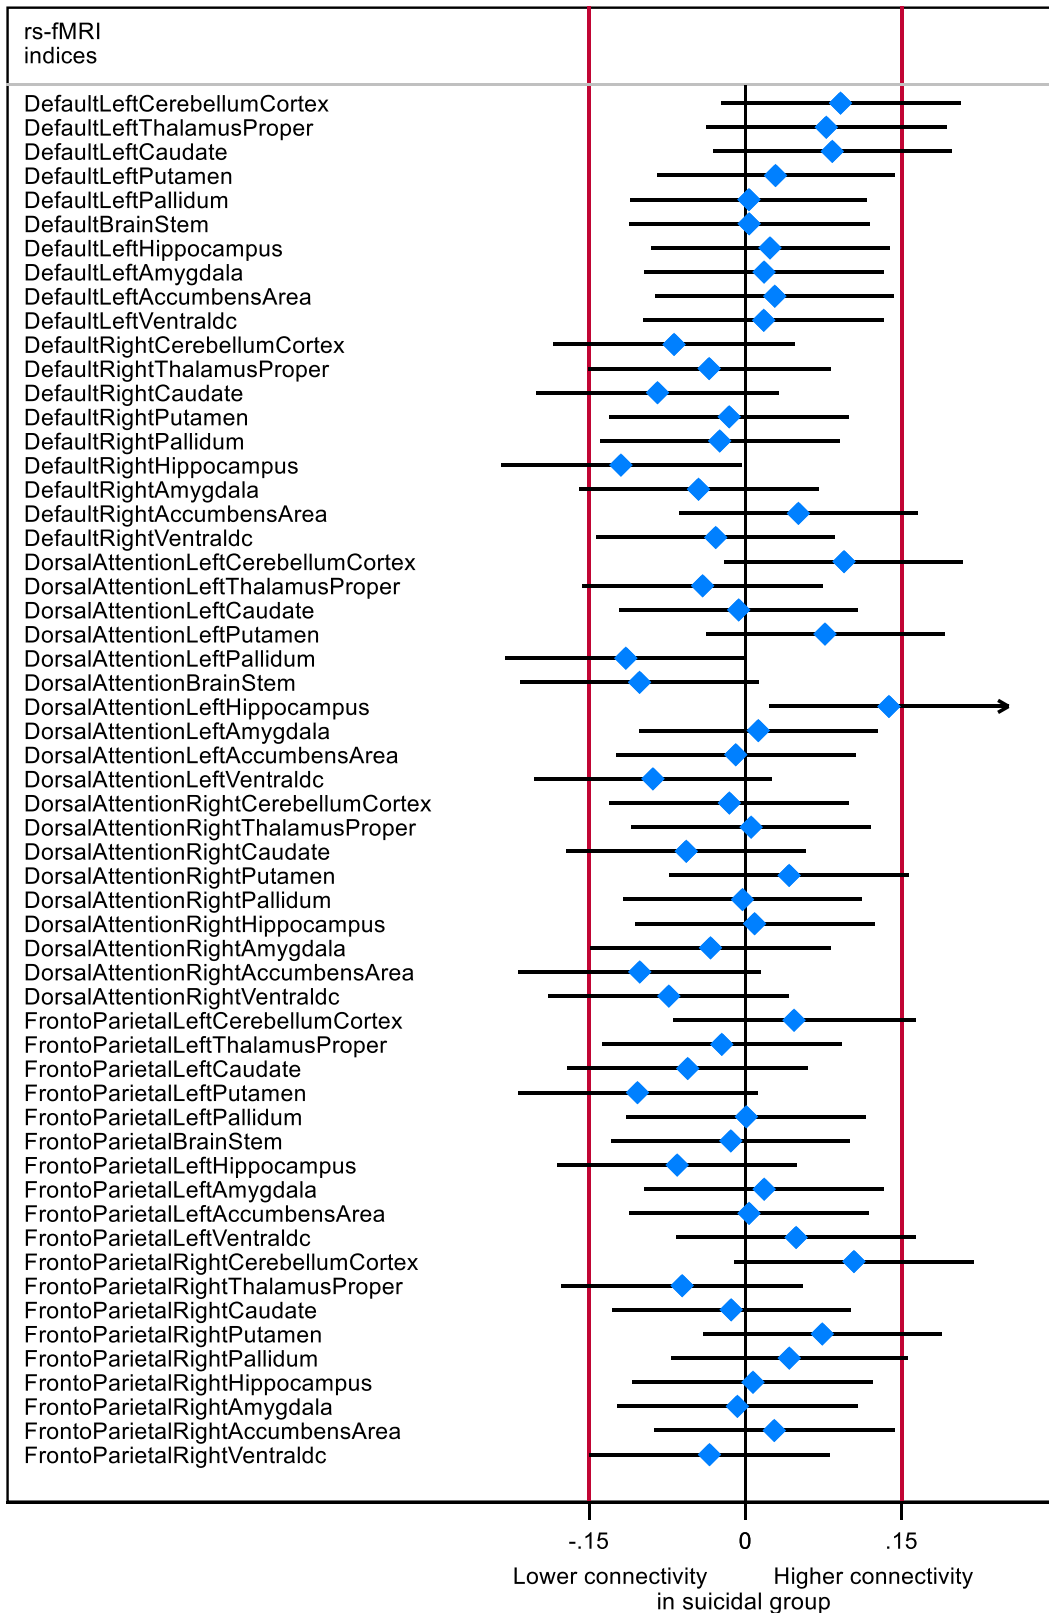

**eFigure 8 (2 of 6).** Results of the Equivalence test for differences in connectivity between the never-suicidal group and the child-reported suicidality group. The figure shows the effect sizes and 95% confidence intervals of the difference against the interval of equivalence (-0.15 to 0.15).

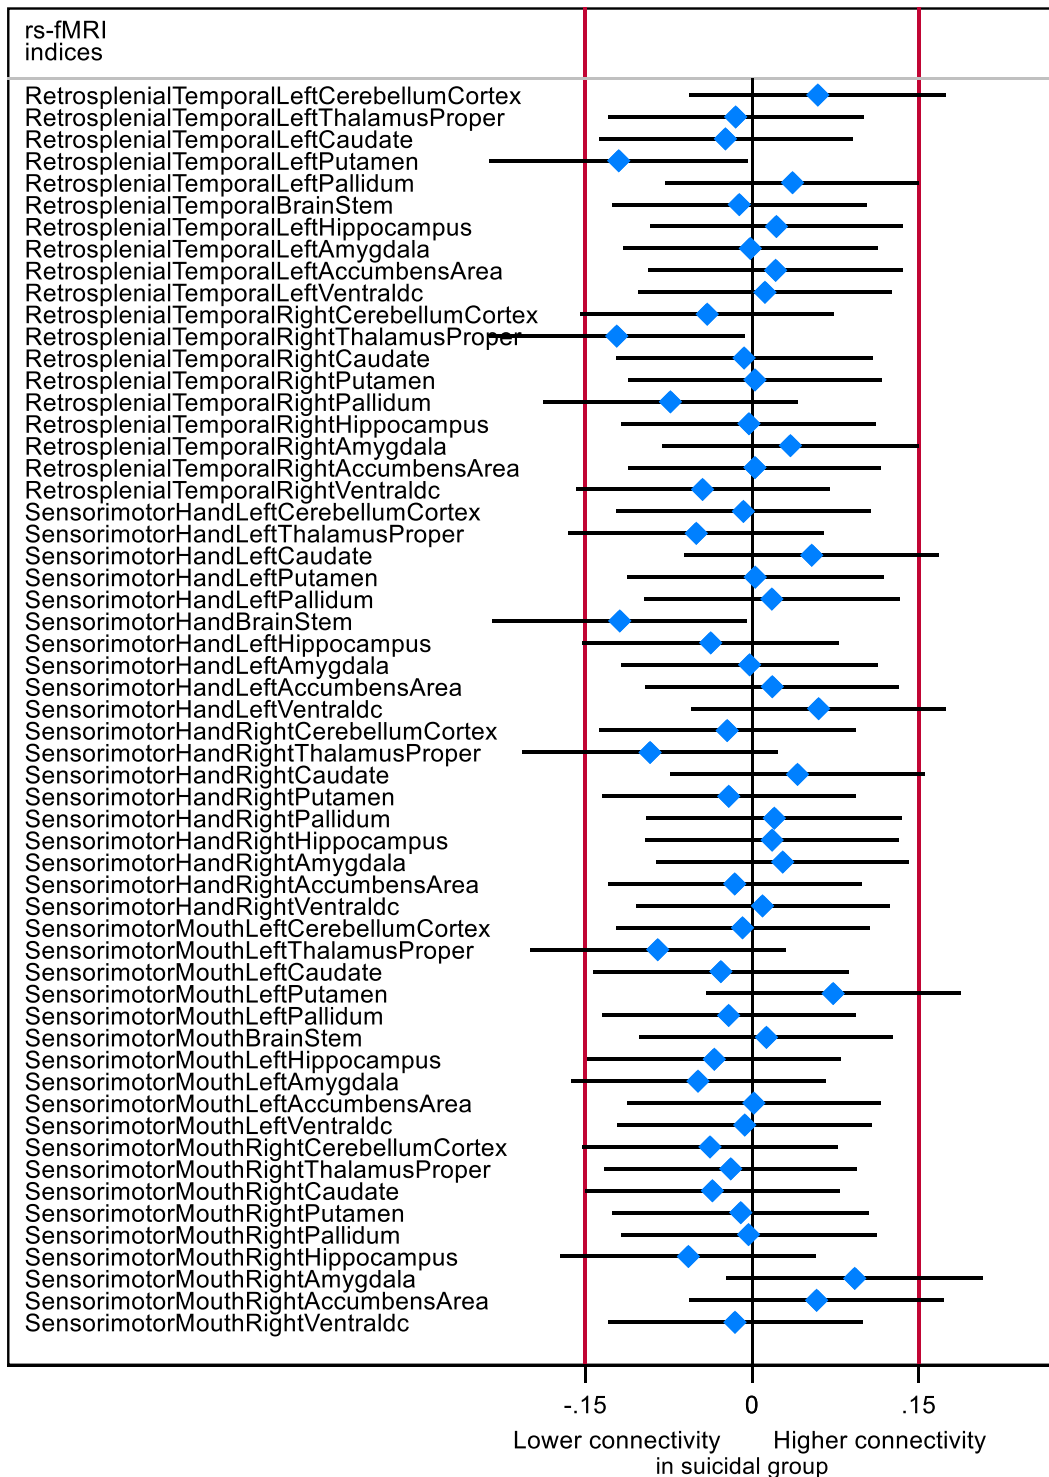

**eFigure 8 (3 of 6).** Results of the Equivalence test for differences in connectivity between the never-suicidal group and the child-reported suicidality group. The figure shows the effect sizes and 95% confidence intervals of the difference against the interval of equivalence (-0.15 to 0.15).

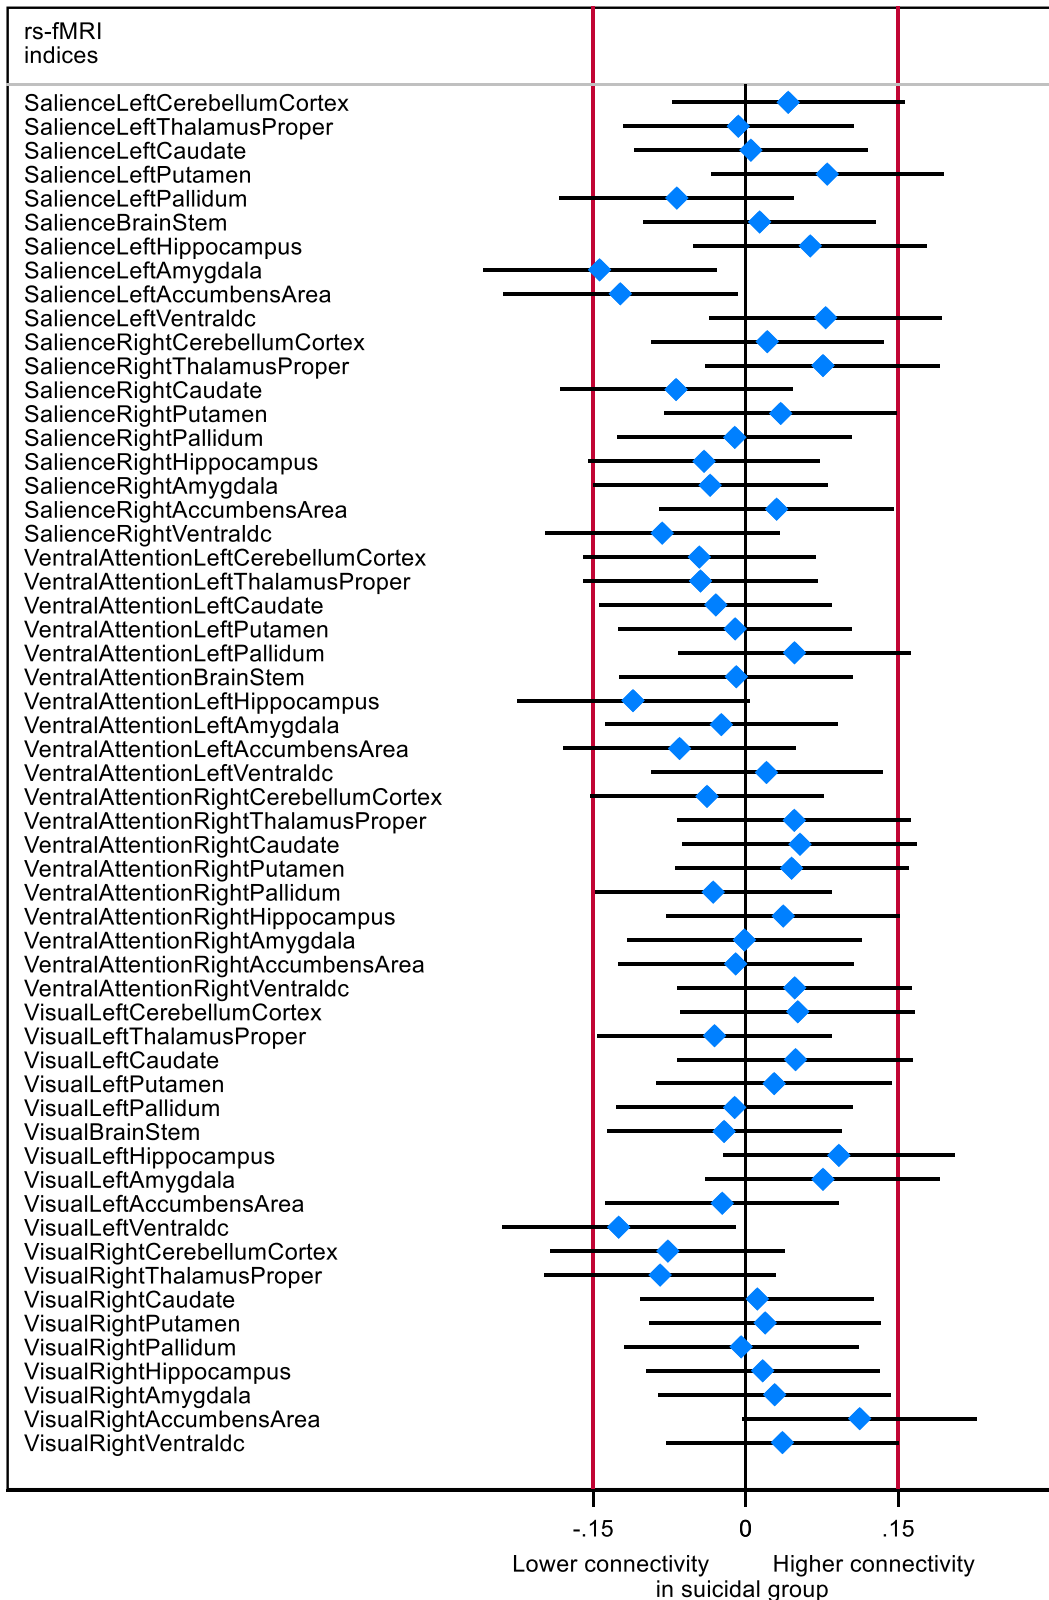

**eFigure 8 (4 of 6).** Results of the Equivalence test for differences in connectivity between the never-suicidal group and the child-reported suicidality group. The figure shows the effect sizes and 95% confidence intervals of the difference against the interval of equivalence (-0.15 to 0.15).

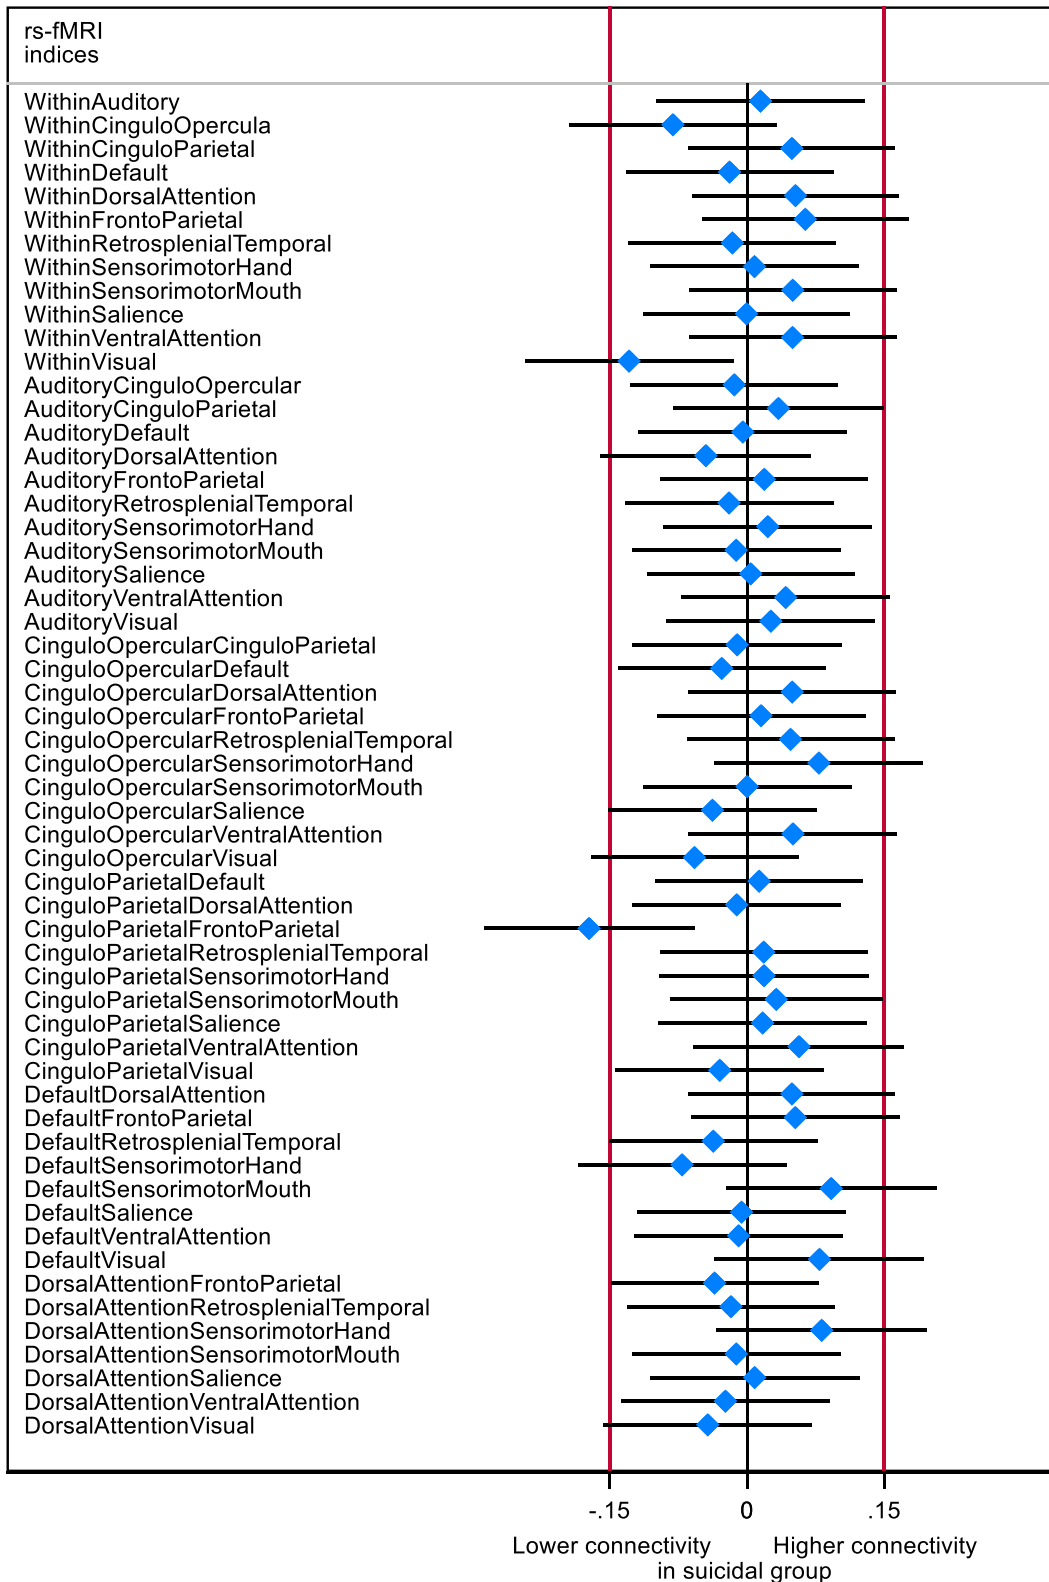

**eFigure 8 (5 of 6).** Results of the Equivalence test for differences in connectivity between the never-suicidal group and the child-reported suicidality group. The figure shows the effect sizes and 95% confidence intervals of the difference against the interval of equivalence (-0.15 to 0.15).

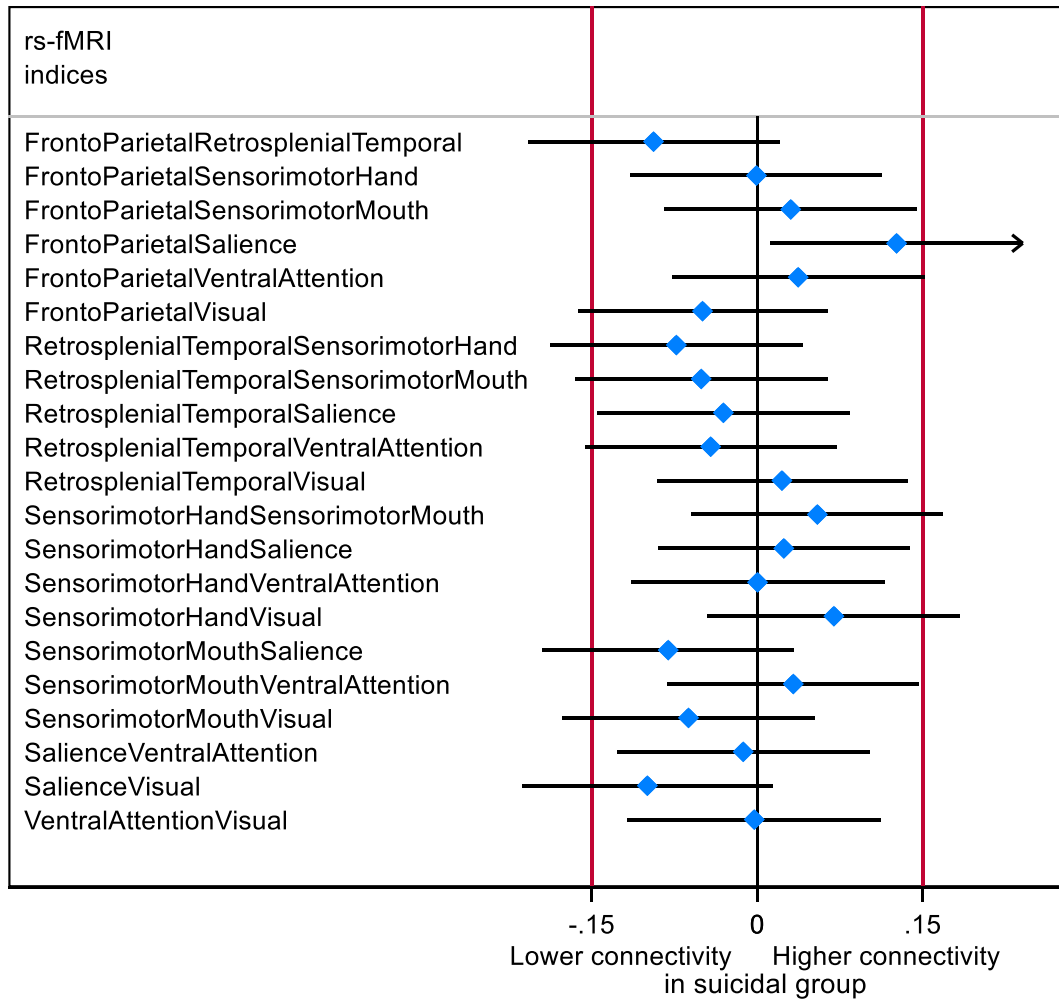

**eFigure 8 (6 of 6).** Results of the Equivalence test for differences in connectivity between the never-suicidal group and the child-reported suicidality group. The figure shows the effect sizes and 95% confidence intervals of the difference against the interval of equivalence (-0.15 to 0.15).

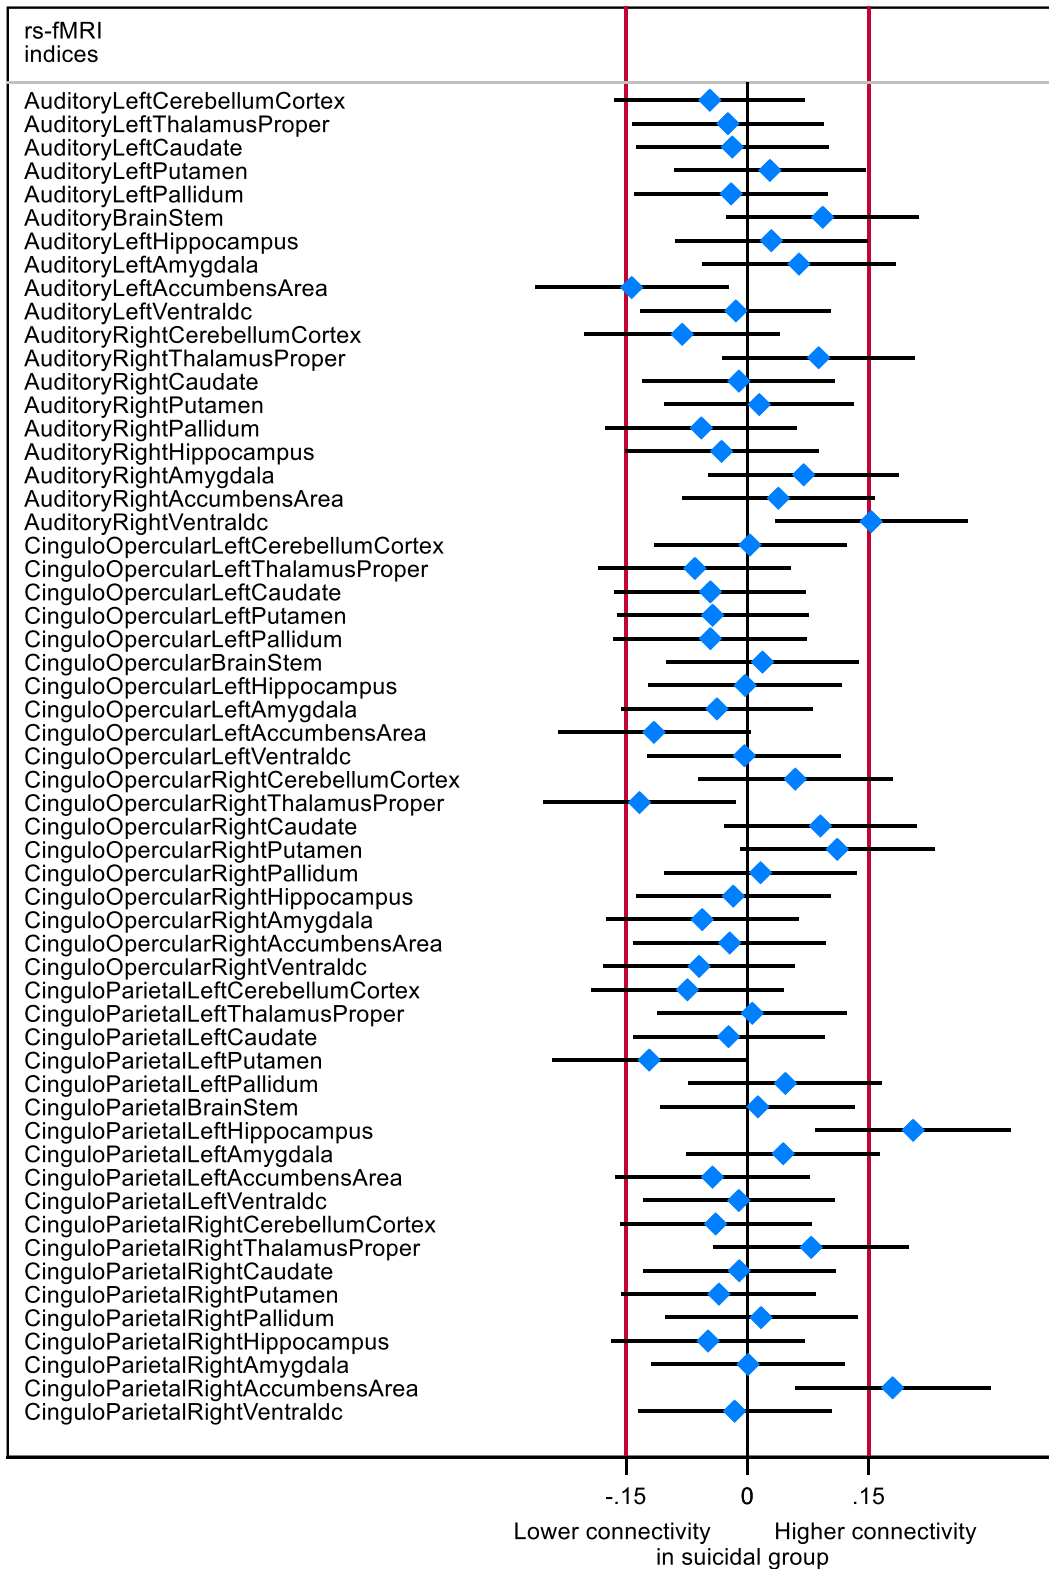

**eFigure 9 (1 of 6).** Results of the Equivalence test for differences in connectivity between the never-suicidal group and the caregiver-reported suicidality group. The figure shows the effect sizes and 95% confidence intervals of the difference against the interval of equivalence (-0.15 to 0.15).



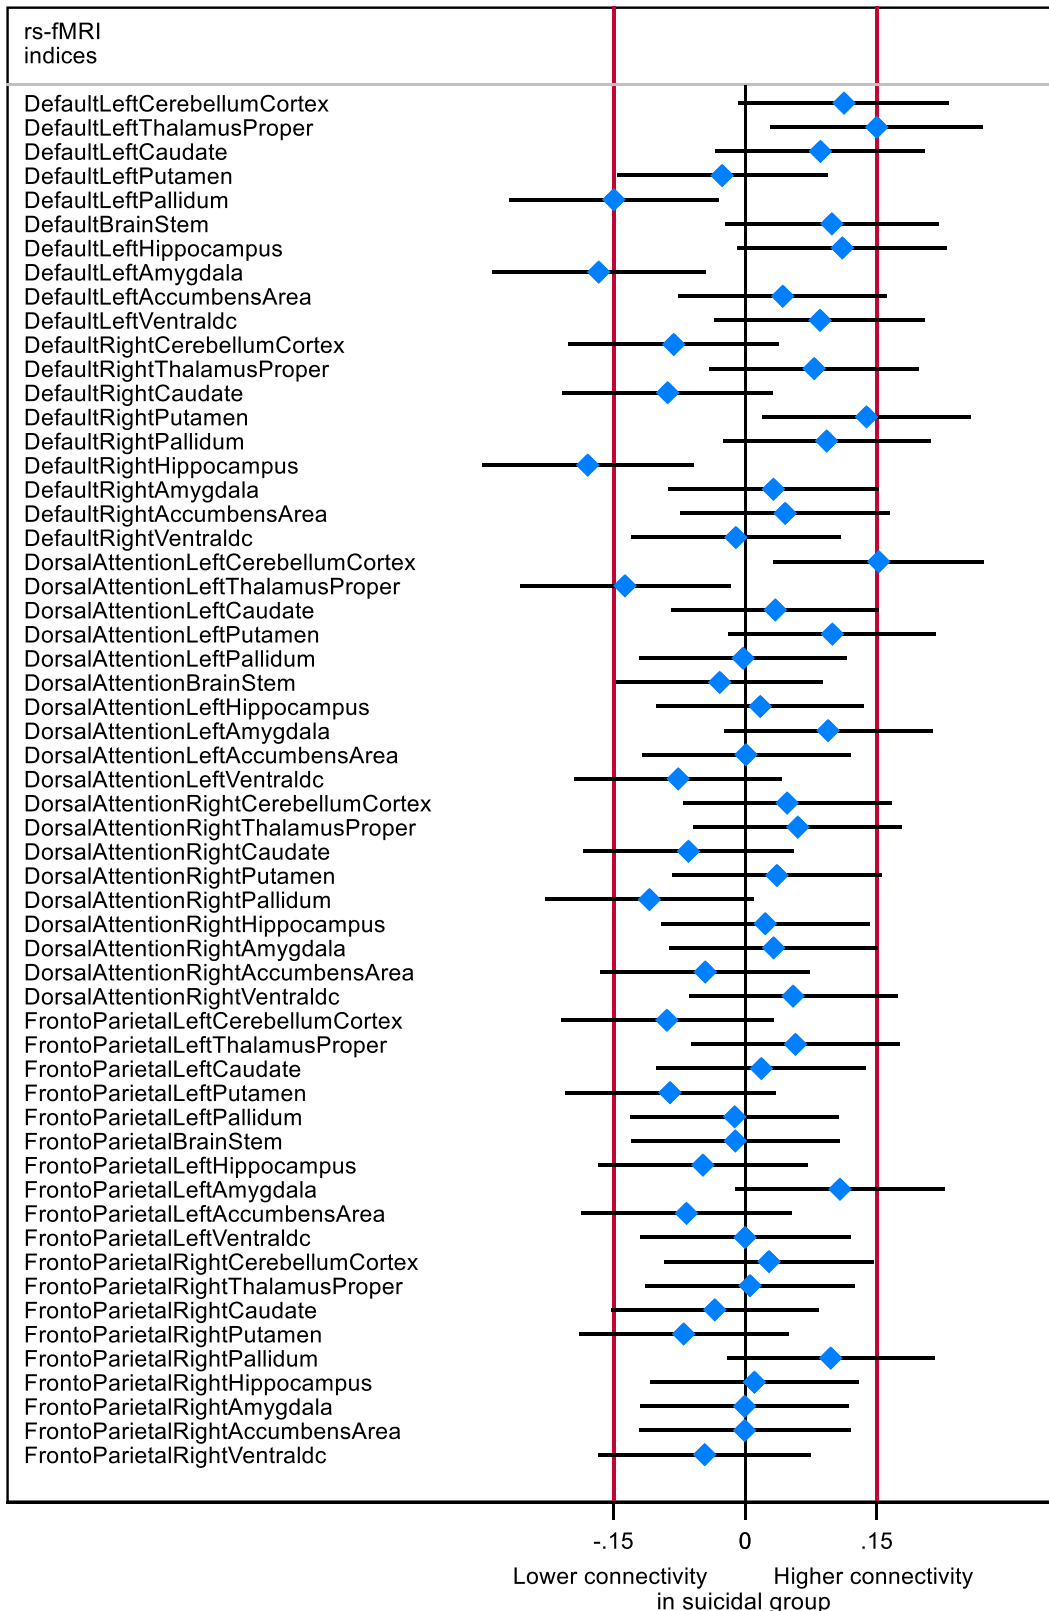

**eFigure 9 (2 of 6).** Results of the Equivalence test for differences in connectivity between the never-suicidal group and the caregiver-reported suicidality group. The figure shows the effect sizes and 95% confidence intervals of the difference against the interval of equivalence (-0.15 to 0.15).

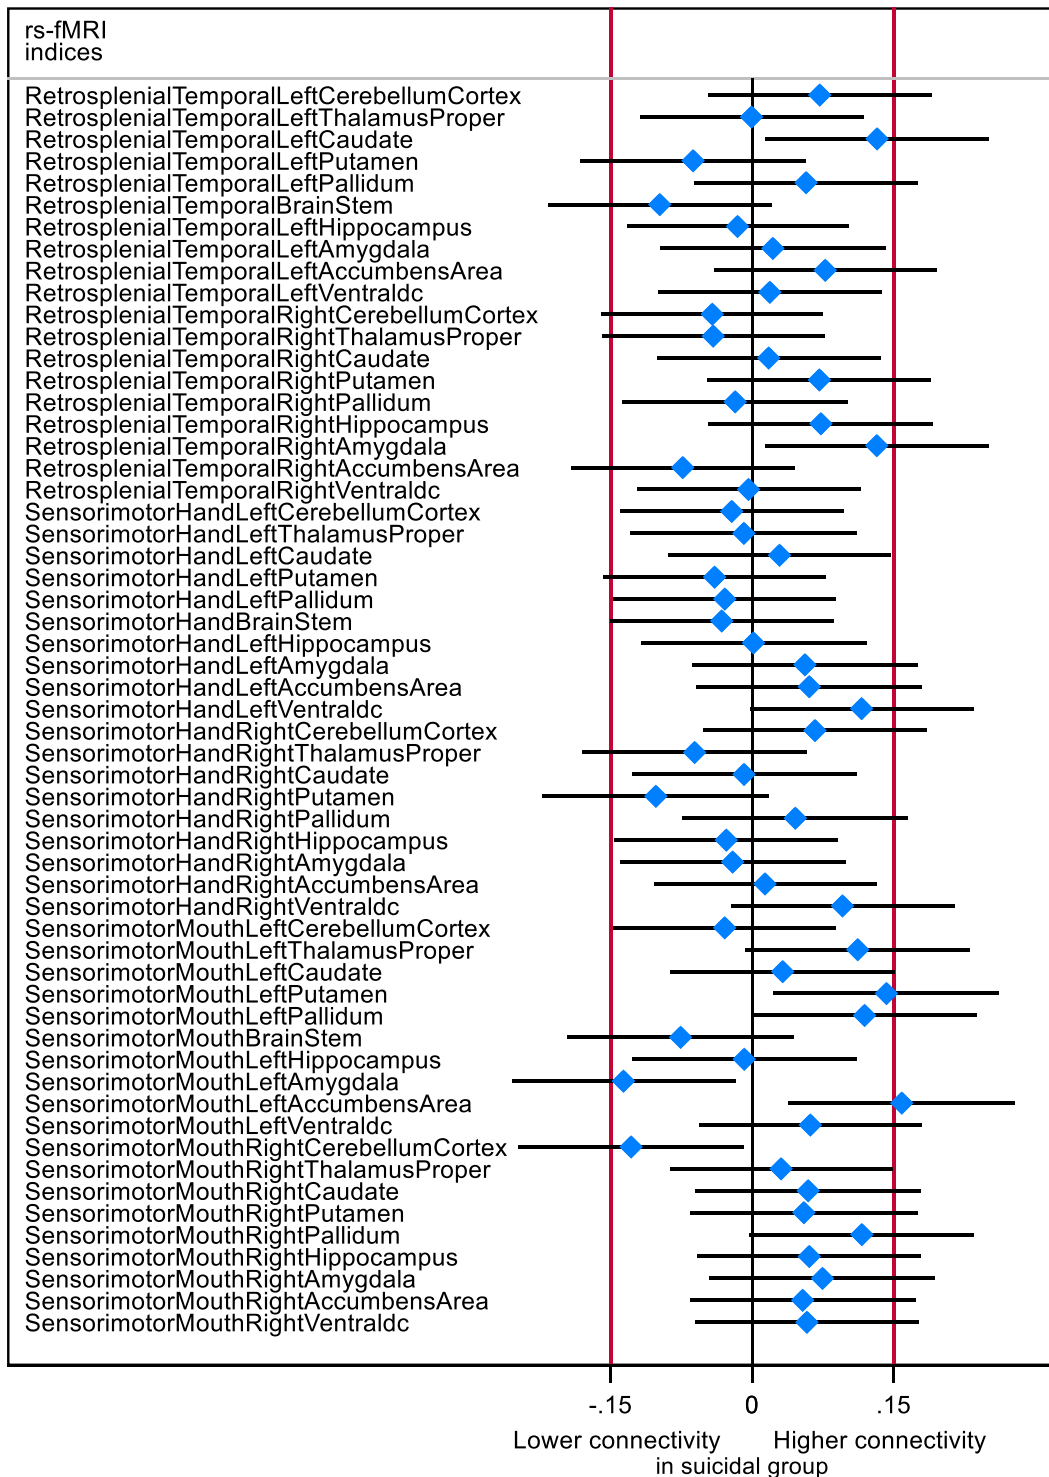

**eFigure 9 (3 of 6).** Results of the Equivalence test for differences in connectivity between the never-suicidal group and the caregiver-reported suicidality group. The figure shows the effect sizes and 95% confidence intervals of the difference against the interval of equivalence (-0.15 to 0.15).

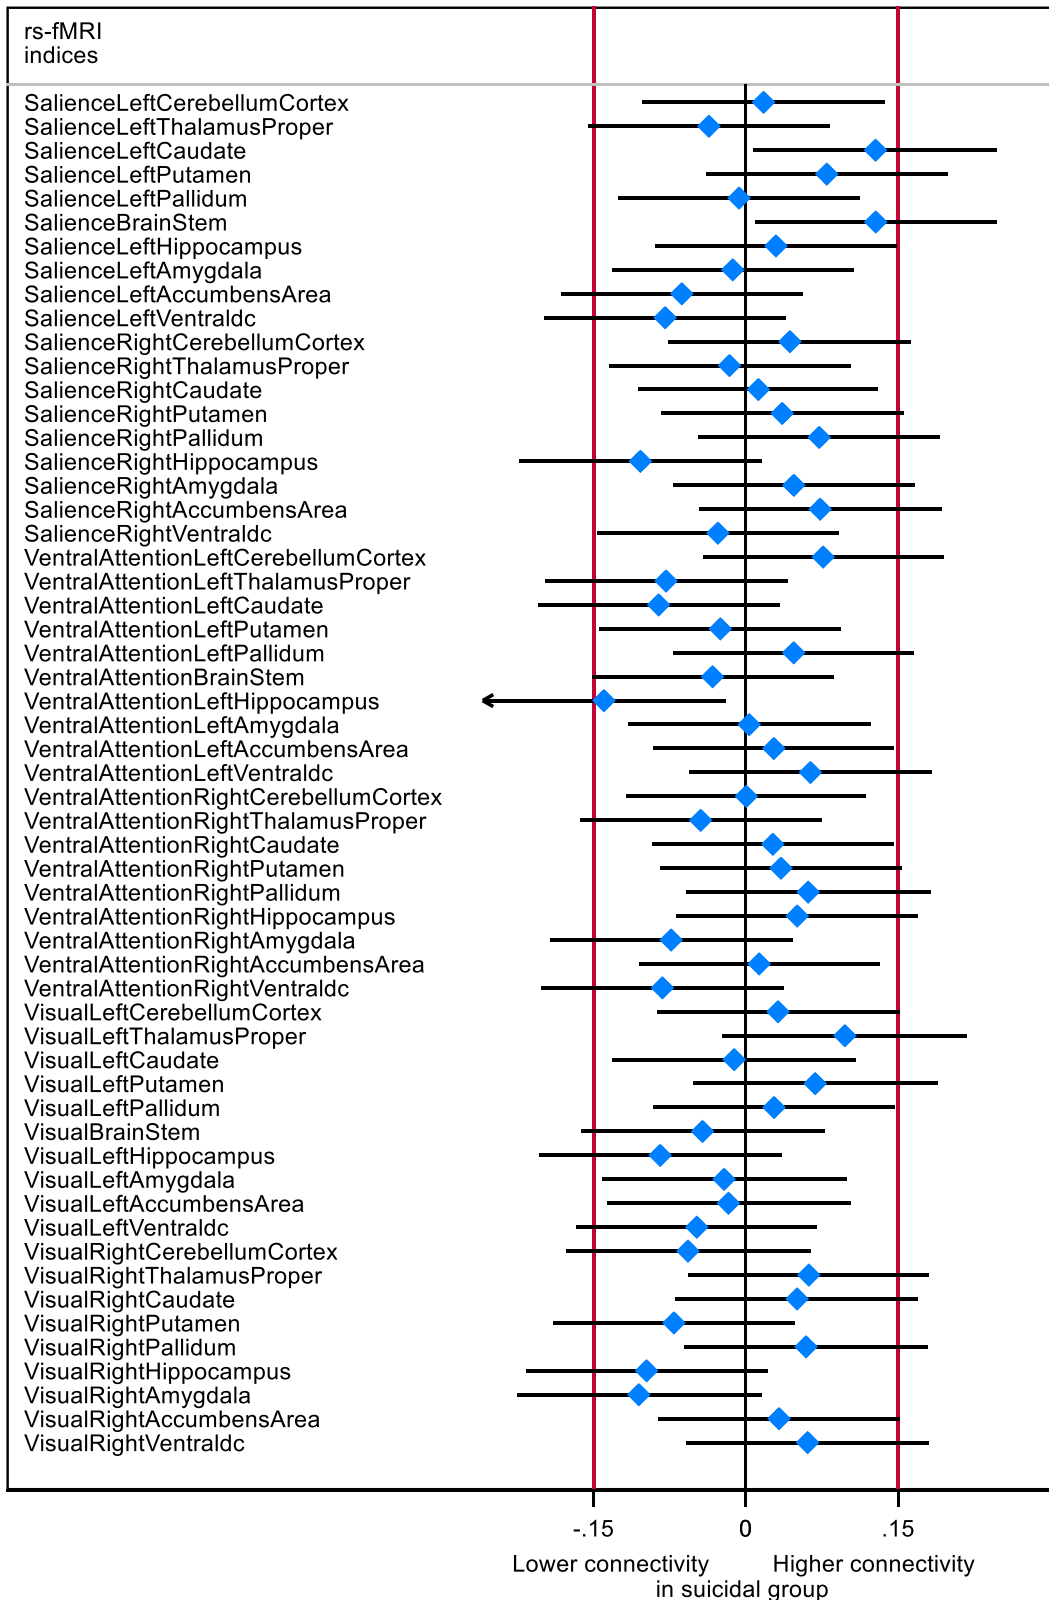

**eFigure 9 (4 of 6).** Results of the Equivalence test for differences in connectivity between the never-suicidal group and the caregiver-reported suicidality group. The figure shows the effect sizes and 95% confidence intervals of the difference against the interval of equivalence (-0.15 to 0.15).

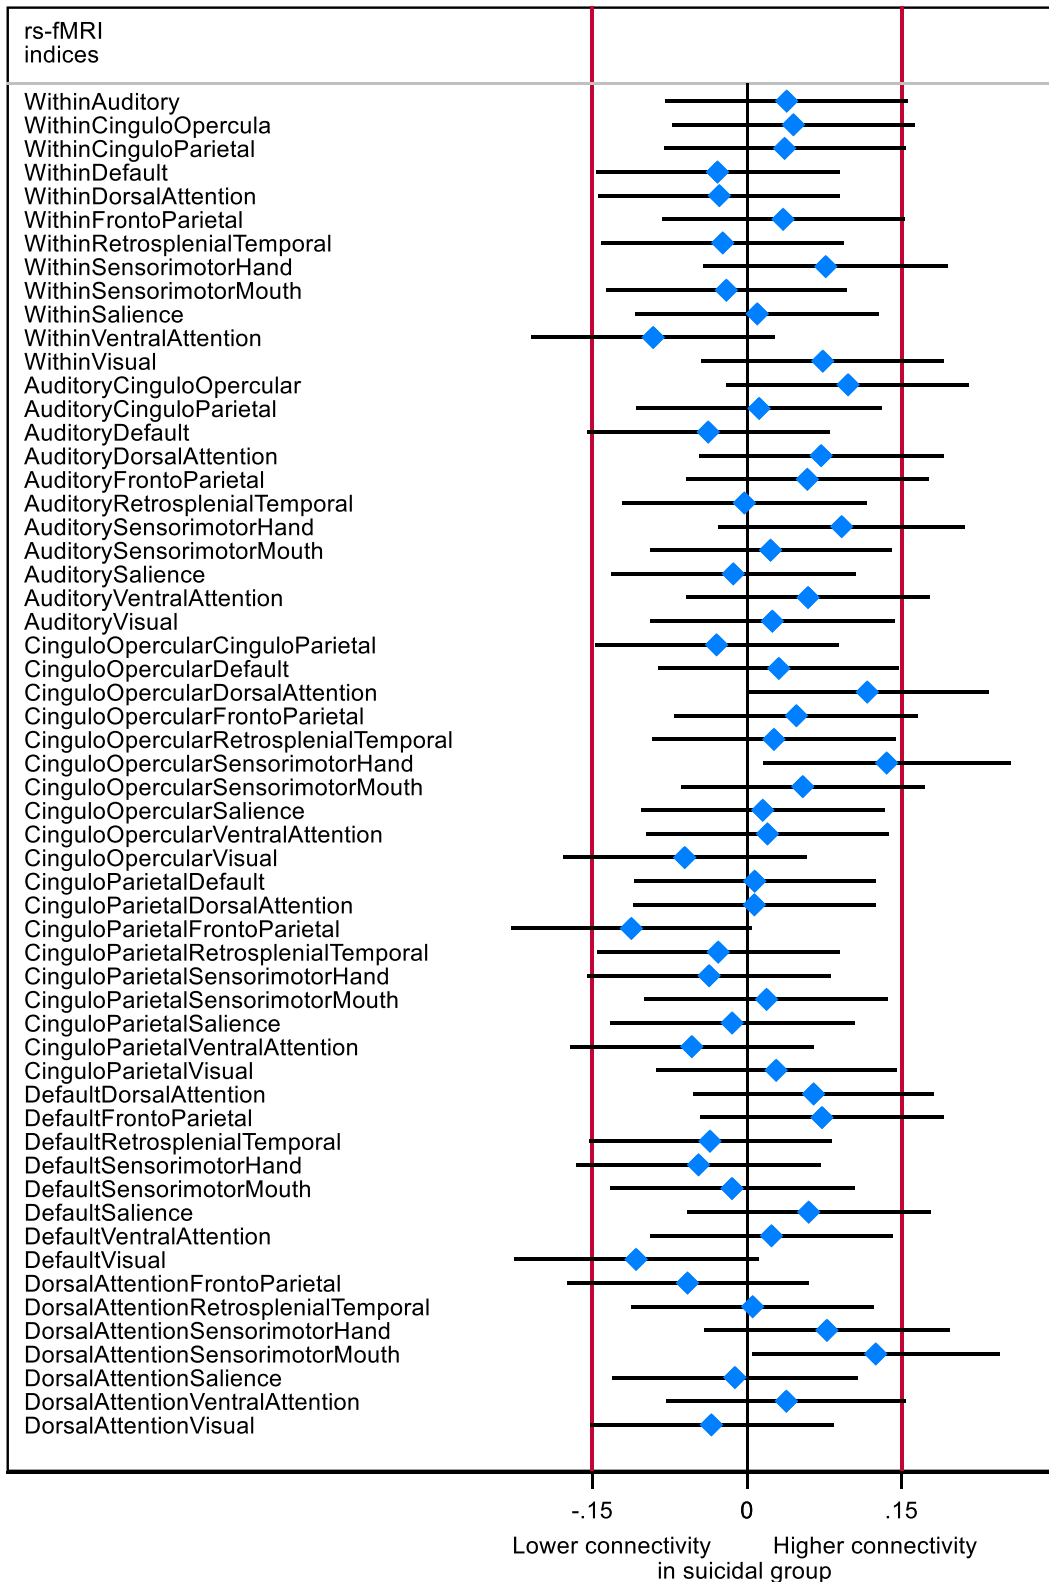

**eFigure 9 (5 of 6).** Results of the Equivalence test for differences in connectivity between the never-suicidal group and the caregiver-reported suicidality group. The figure shows the effect sizes and 95% confidence intervals of the difference against the interval of equivalence (-0.15 to 0.15).

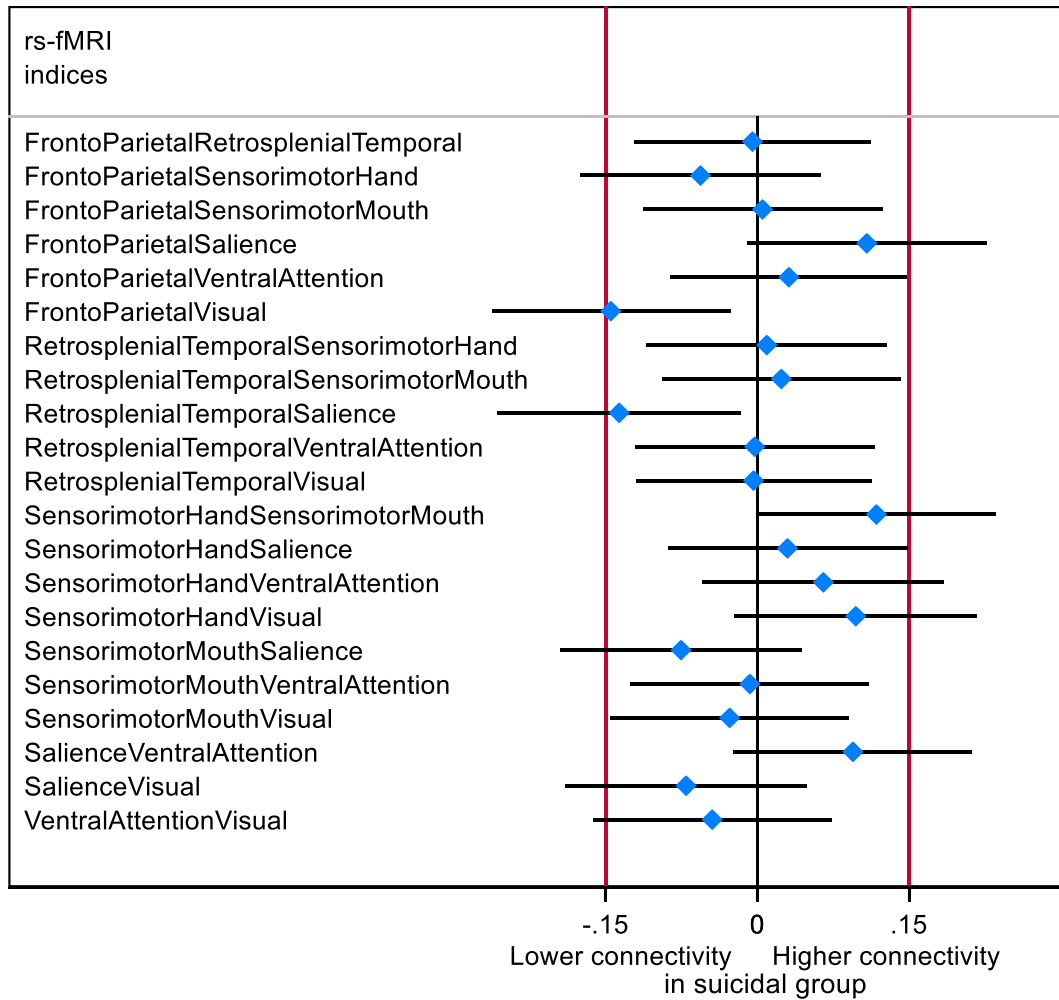

**eFigure 9 (6 of 6).** Results of the Equivalence test for differences in connectivity between the never-suicidal group and the caregiver-reported suicidality group. The figure shows the effect sizes and 95% confidence intervals of the difference against the interval of equivalence (-0.15 to 0.15).

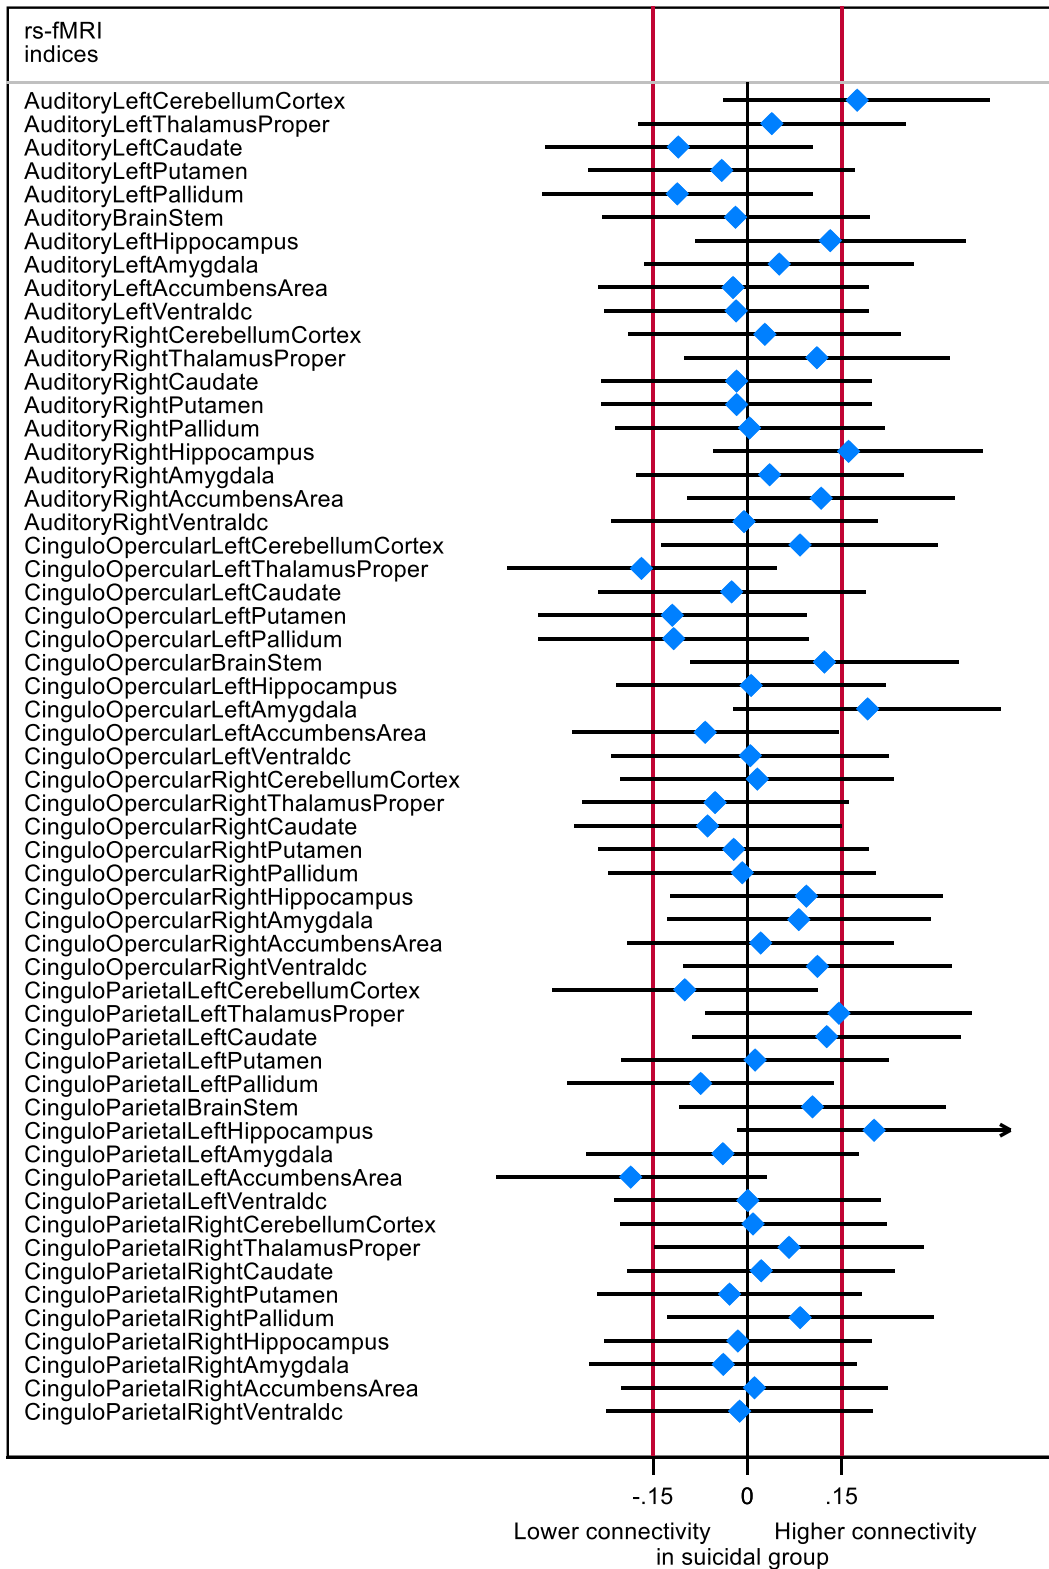

**eFigure 10 (1 of 6).** Results of the Equivalence test for differences in connectivity between the never-suicidal group and the concordantly -reported suicidality group. The figure shows the effect sizes and 95% confidence intervals of the difference against the interval of equivalence (-0.15 to 0.15).

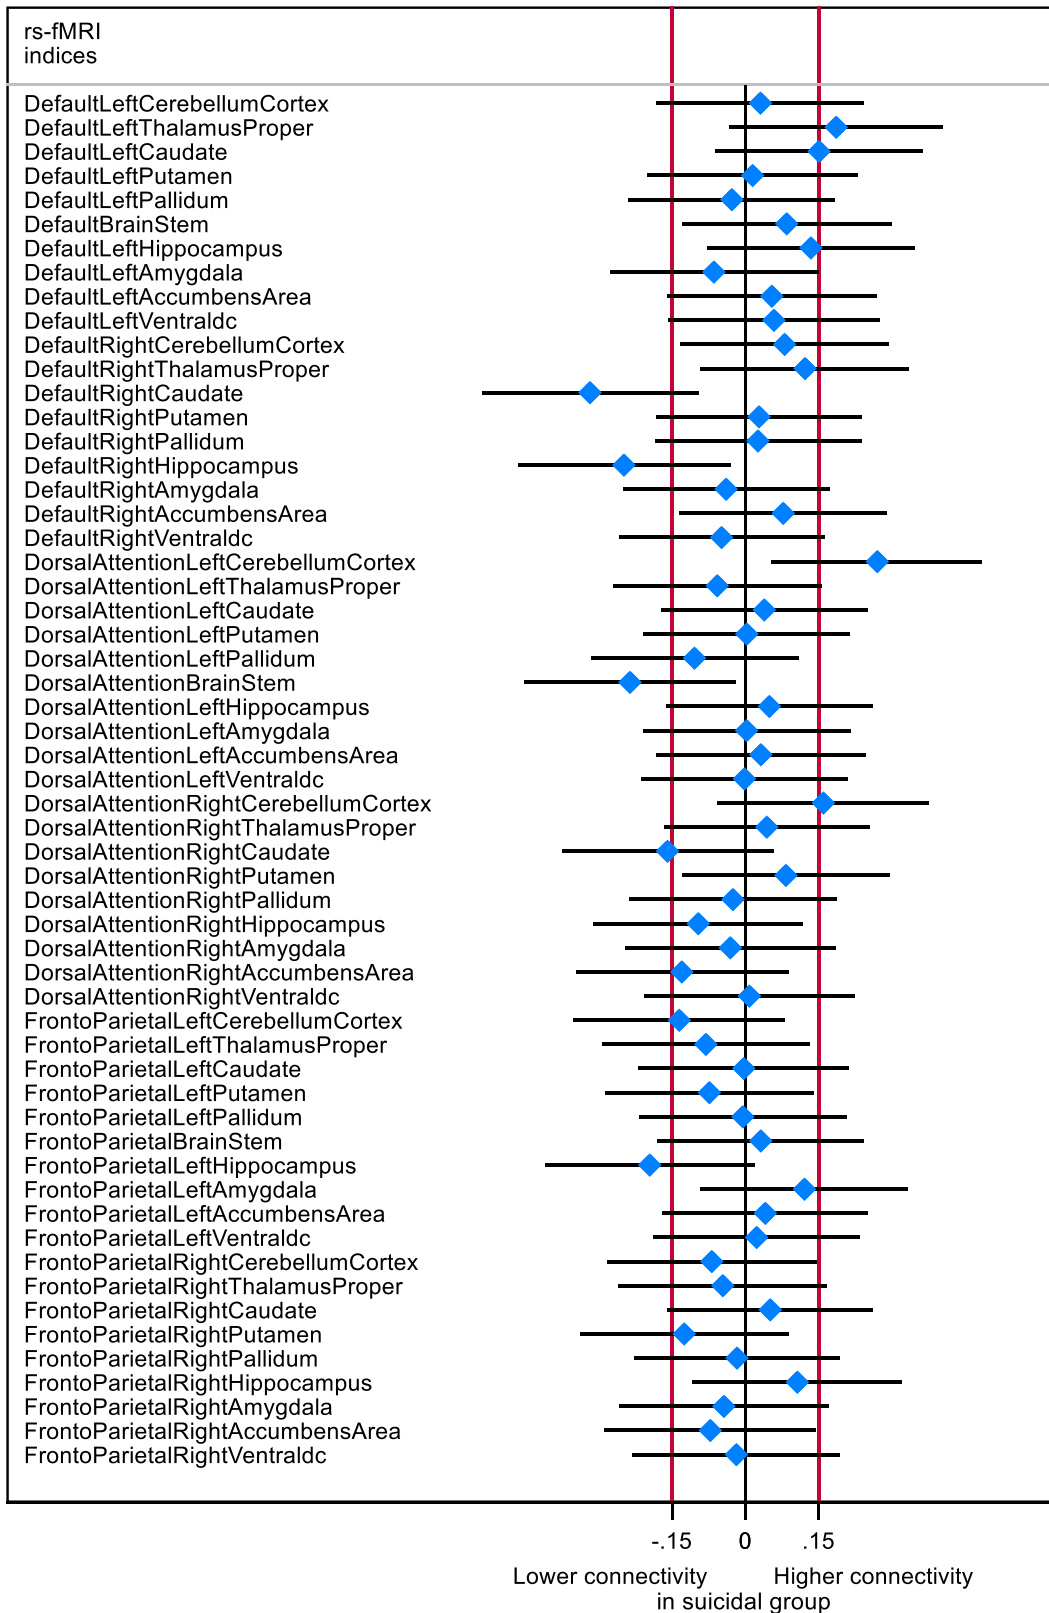

**eFigure 10 (2 of 6).** Results of the Equivalence test for differences in connectivity between the never-suicidal group and the concordantly -reported suicidality group. The figure shows the effect sizes and 95% confidence intervals of the difference against the interval of equivalence (-0.15 to 0.15).

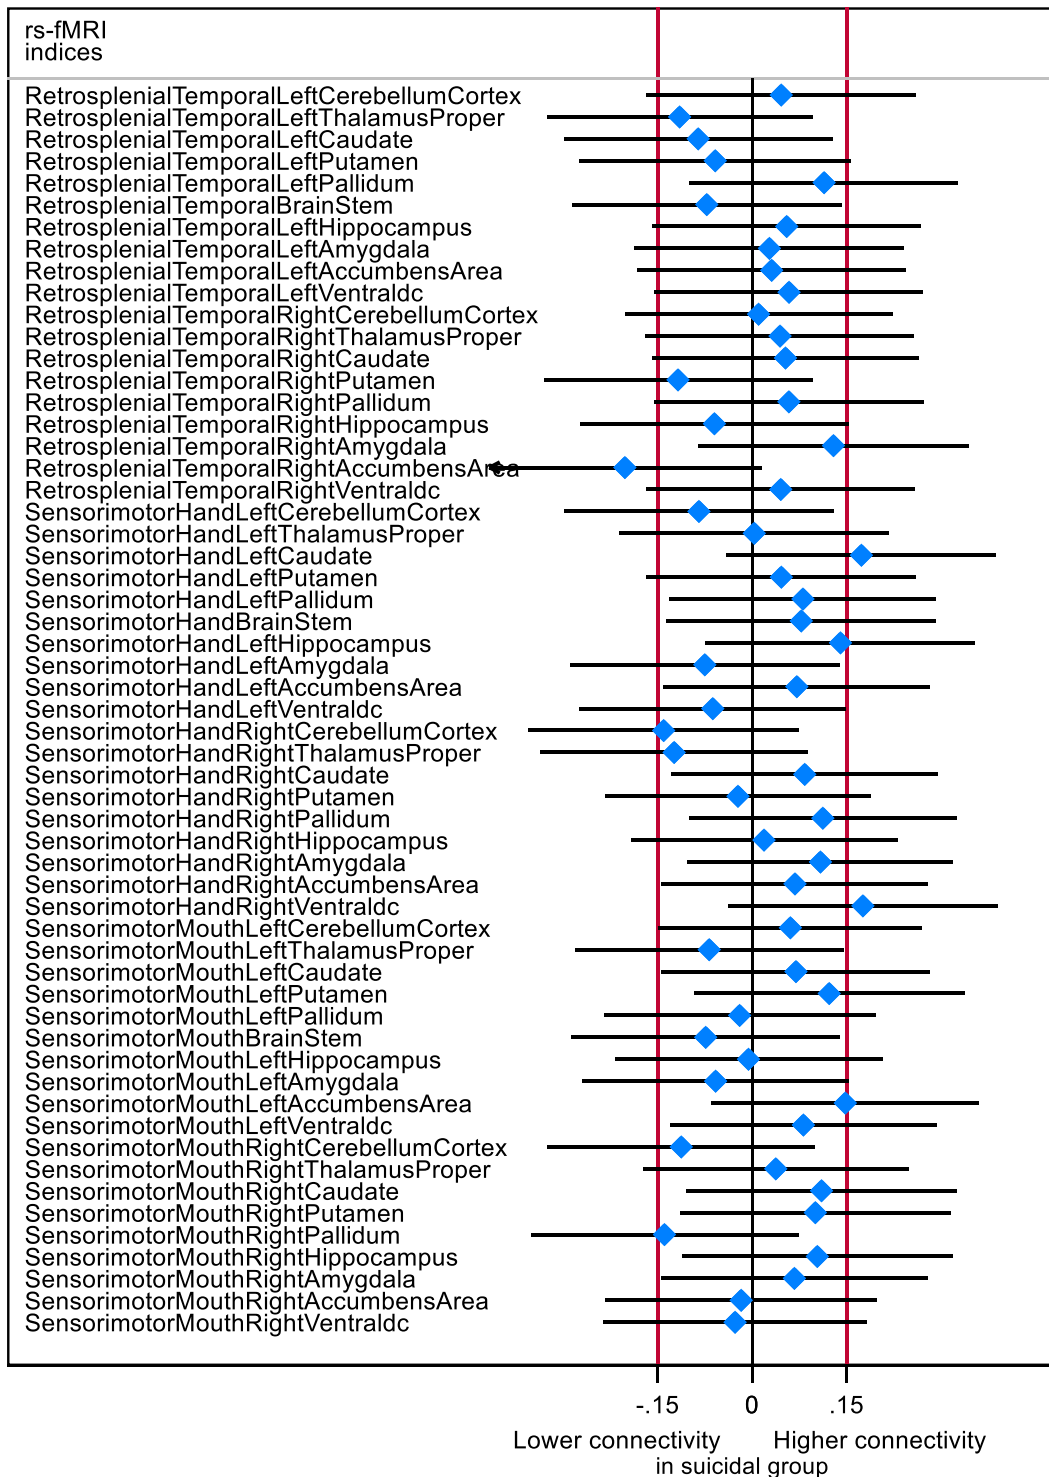

**eFigure 10 (3 of 6).** Results of the Equivalence test for differences in connectivity between the never-suicidal group and the concordantly -reported suicidality group. The figure shows the effect sizes and 95% confidence intervals of the difference against the interval of equivalence (-0.15 to 0.15).



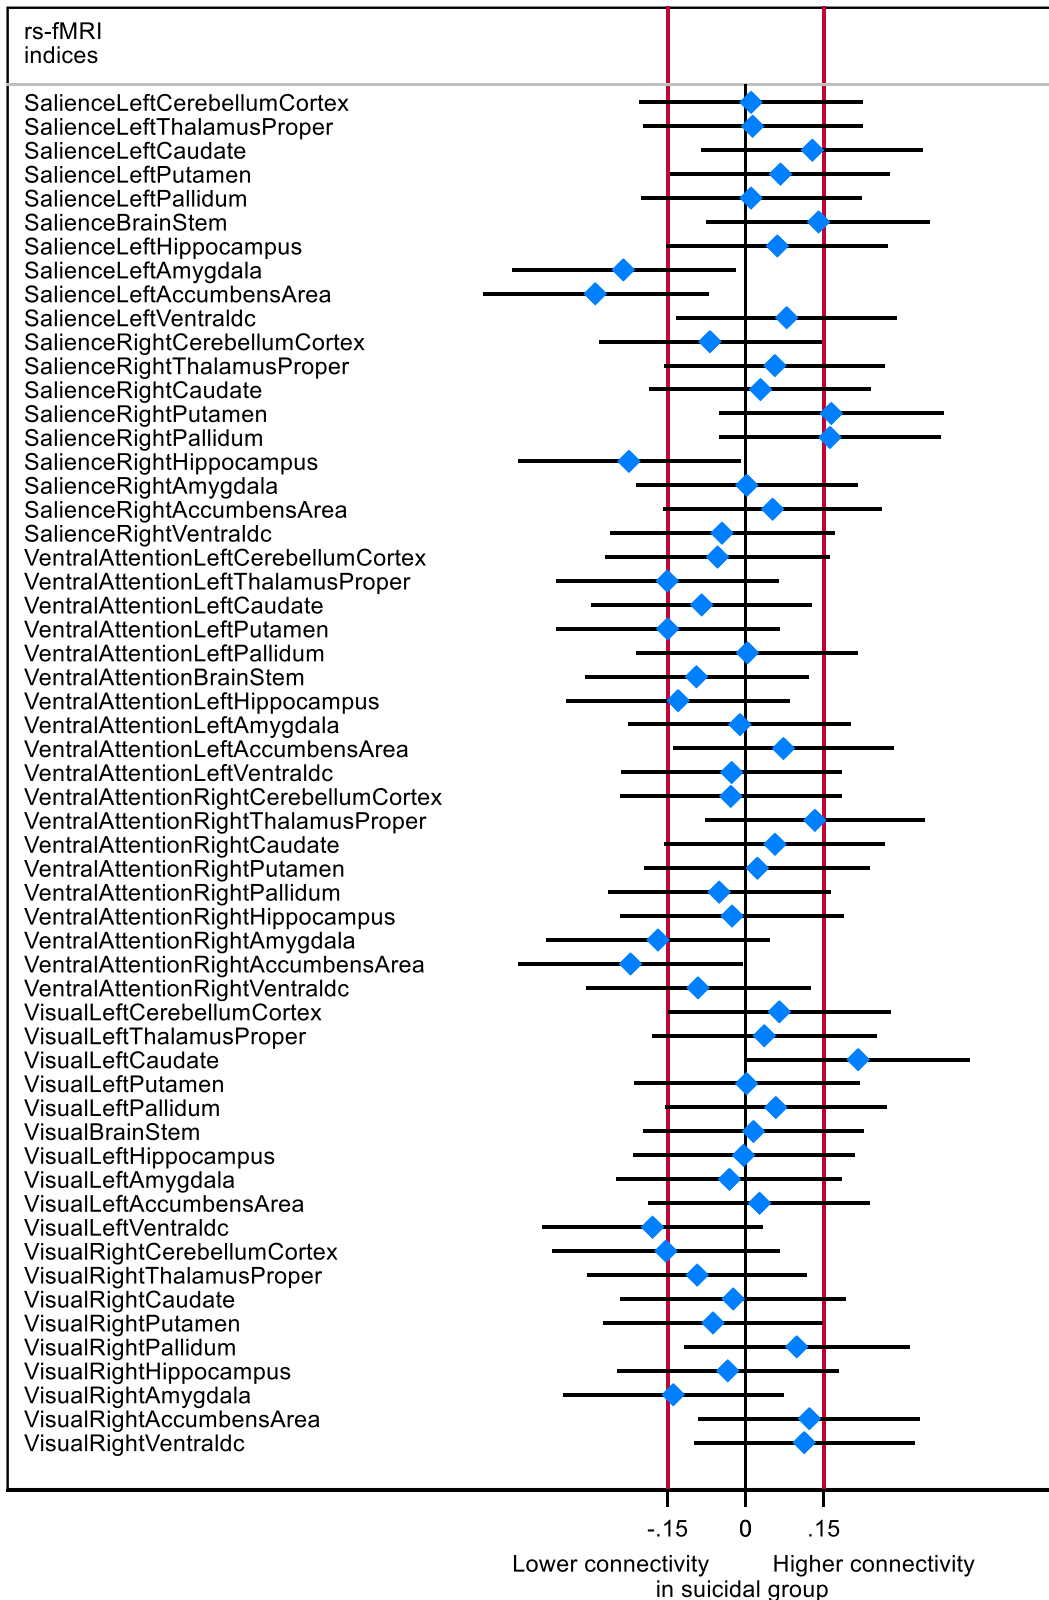

**eFigure 10 (4 of 6).** Results of the Equivalence test for differences in connectivity between the never-suicidal group and the concordantly -reported suicidality group. The figure shows the effect sizes and 95% confidence intervals of the difference against the interval of equivalence (-0.15 to 0.15).

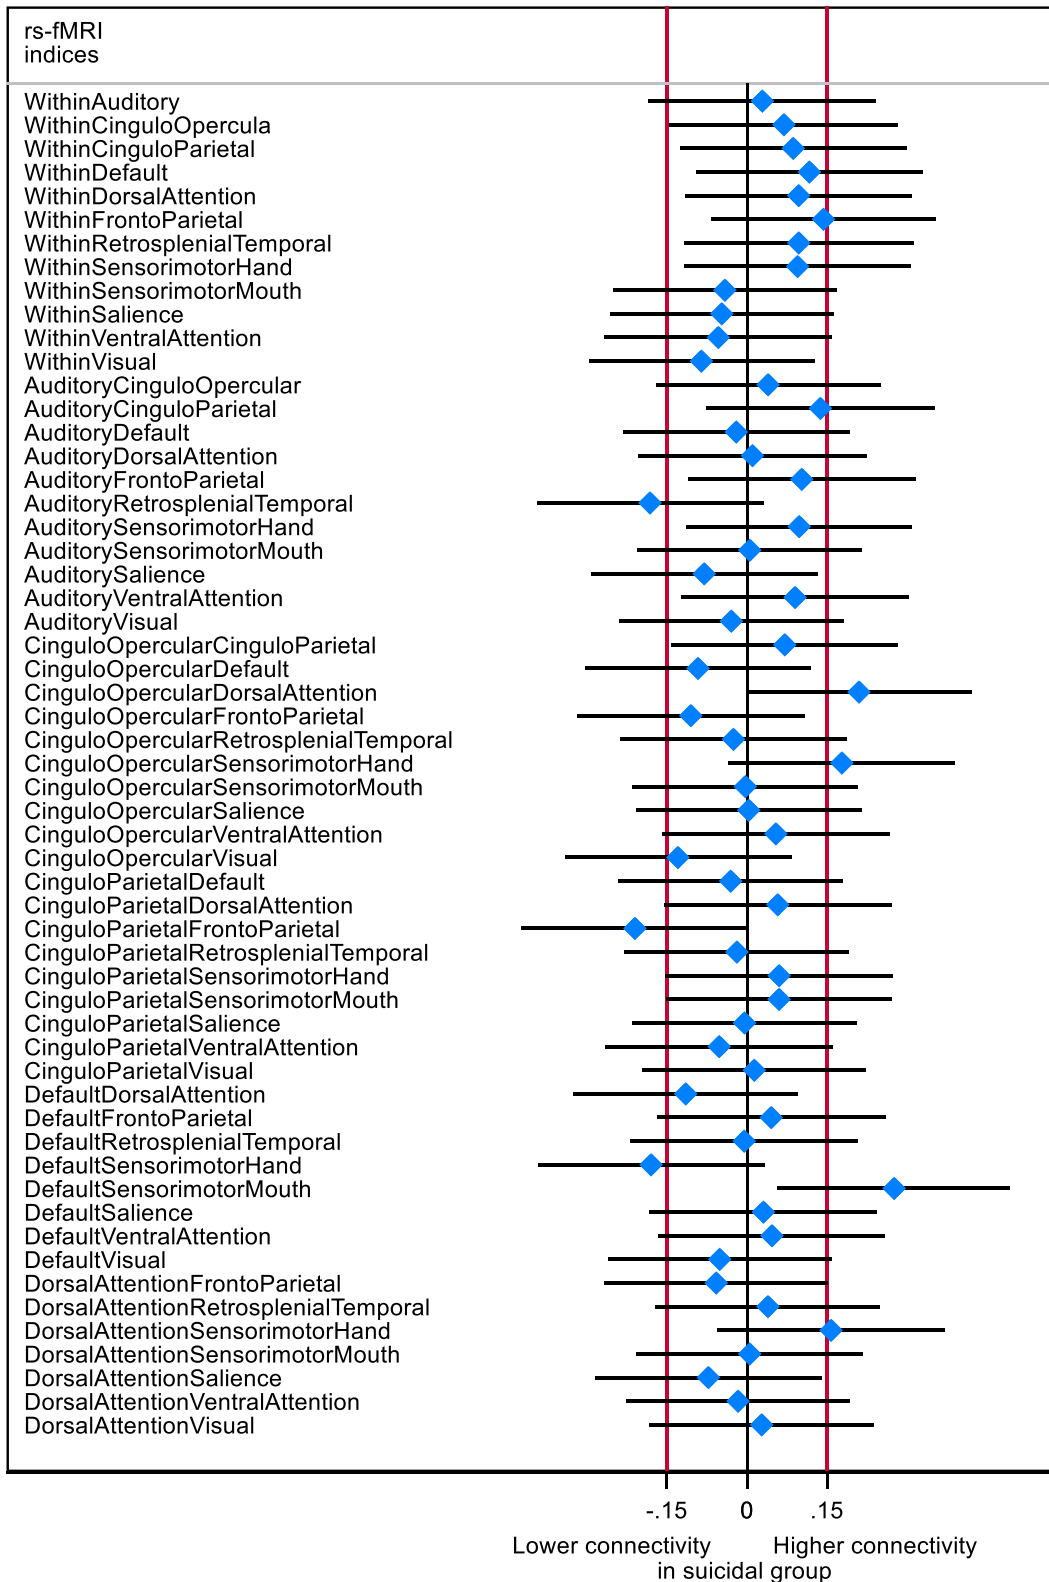

**eFigure 10 (5 of 6).** Results of the Equivalence test for differences in connectivity between the never-suicidal group and the concordantly -reported suicidality group. The figure shows the effect sizes and 95% confidence intervals of the difference against the interval of equivalence (-0.15 to 0.15).

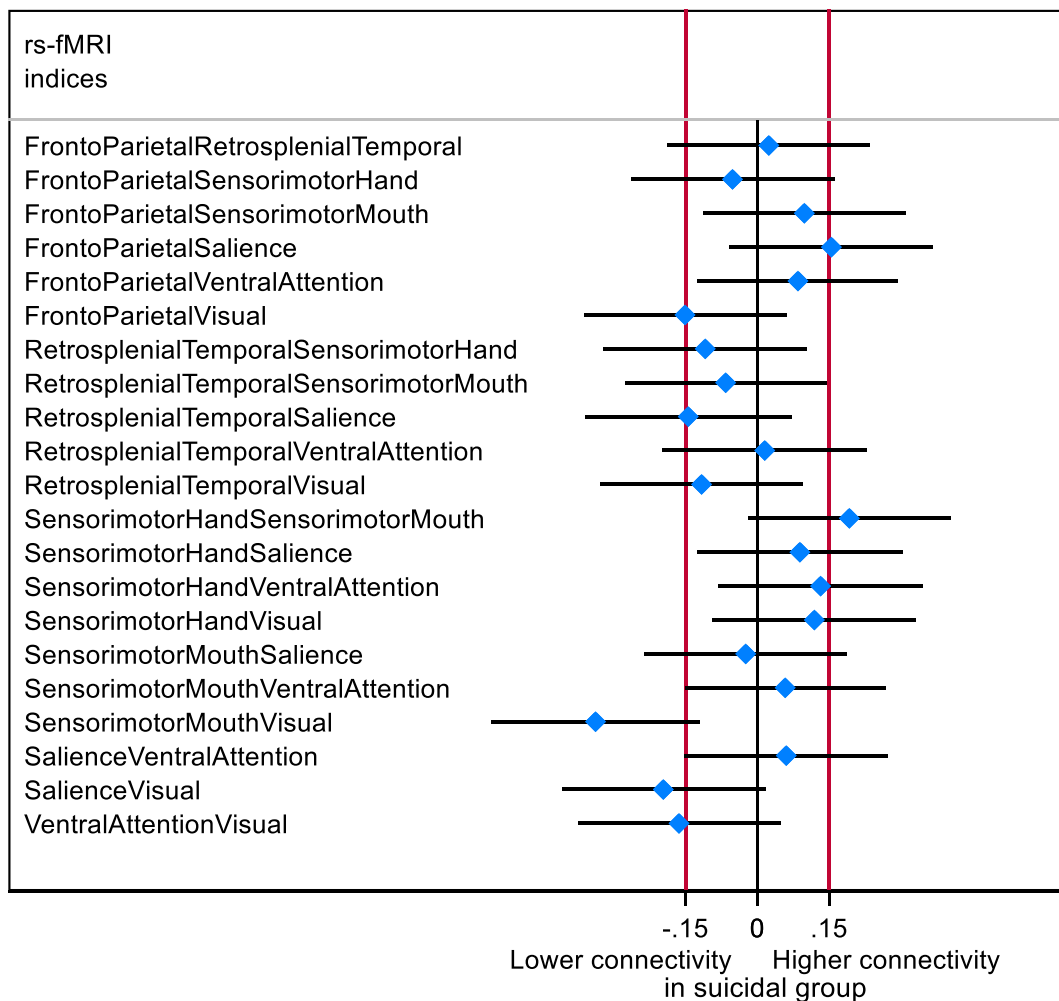

**eFigure 10 (6 of 6).** Results of the Equivalence test for differences in connectivity between the never-suicidal group and the concordantly -reported suicidality group. The figure shows the effect sizes and 95% confidence intervals of the difference against the interval of equivalence (-0.15 to 0.15).

## 5. Task-Based Functional Imaging

### Monetary Incentive Delay task (MID)

#### Anticipation of large reward vs neutral

**eTable 11. Differences in functional activity between the never-suicidal group and the child-reported suicidality group for anticipation of reward: Welch's t-test**

| ROIs | Mean | 95%CI | t | p (unc) | p FDR |
|------|------|-------|---|---------|-------|
|------|------|-------|---|---------|-------|

**eTable 11. Differences in functional activity between the never-suicidal group and the child-reported suicidality group for anticipation of reward: Welch's t-test**

| ROIs                        | Mean   | 95%CI          | t     | p (unc)      | p FDR |
|-----------------------------|--------|----------------|-------|--------------|-------|
| <b>Subcortical regions</b>  |        |                |       |              |       |
| Left.Cerebellum.Cortex      | -0.019 | -0.046, 0.009  | -1.32 | 0.187        | 0.600 |
| Left.Thalamus.Proper        | -0.008 | -0.024, 0.009  | -0.92 | 0.357        | 0.747 |
| Left.Caudate                | -0.004 | -0.027, 0.02   | -0.30 | 0.764        | 0.911 |
| Left.Putamen                | -0.008 | -0.027, 0.011  | -0.83 | 0.410        | 0.752 |
| Left.Pallidum               | 0.005  | -0.012, 0.022  | 0.61  | 0.544        | 0.834 |
| Brain.Stem                  | -0.005 | -0.025, 0.015  | -0.49 | 0.624        | 0.848 |
| Left.Hippocampus            | 0.000  | -0.017, 0.017  | 0.02  | 0.984        | 0.996 |
| Left.Amygdala               | 0.005  | -0.015, 0.025  | 0.49  | 0.623        | 0.848 |
| Left.Accumbens.area         | 0.008  | -0.02, 0.036   | 0.58  | 0.565        | 0.838 |
| Left.VentralDC              | -0.012 | -0.033, 0.008  | -1.19 | 0.235        | 0.680 |
| Right.Cerebellum.Cortex     | -0.008 | -0.034, 0.018  | -0.61 | 0.545        | 0.834 |
| Right.Thalamus.Proper       | -0.010 | -0.028, 0.008  | -1.08 | 0.280        | 0.708 |
| Right.Caudate               | 0.000  | -0.026, 0.026  | -0.01 | 0.990        | 0.996 |
| Right.Putamen               | -0.010 | -0.031, 0.011  | -0.94 | 0.347        | 0.745 |
| Right.Pallidum              | 0.007  | -0.01, 0.025   | 0.83  | 0.408        | 0.752 |
| Right.Hippocampus           | -0.007 | -0.024, 0.009  | -0.85 | 0.398        | 0.752 |
| Right.Amygdala              | -0.011 | -0.035, 0.012  | -0.95 | 0.345        | 0.745 |
| Right.Accumbens.area        | 0.009  | -0.016, 0.034  | 0.67  | 0.504        | 0.801 |
| Right.VentralDC             | 0.002  | -0.021, 0.024  | 0.15  | 0.880        | 0.973 |
| <b>Cortical regions</b>     |        |                |       |              |       |
| lh_G_and_S_frontomargin     | -0.007 | -0.045, 0.032  | -0.33 | 0.738        | 0.898 |
| lh_G_and_S_occipital_inf    | -0.026 | -0.059, 0.007  | -1.56 | 0.118        | 0.593 |
| lh_G_and_S_paracentral      | -0.022 | -0.042, -0.001 | -2.03 | <b>0.043</b> | 0.401 |
| lh_G_and_S_subcentral       | -0.024 | -0.046, -0.001 | -2.05 | <b>0.041</b> | 0.401 |
| lh_G_and_S_transv_frontopol | -0.004 | -0.041, 0.033  | -0.22 | 0.825        | 0.944 |
| lh_G_and_S_cingul.Ant       | -0.002 | -0.024, 0.021  | -0.13 | 0.894        | 0.976 |
| lh_G_and_S_cingul.Mid.Ant   | -0.001 | -0.02, 0.018   | -0.09 | 0.925        | 0.982 |
| lh_G_and_S_cingul.Mid.Post  | -0.005 | -0.023, 0.013  | -0.54 | 0.591        | 0.848 |
| lh_G_cingul.Post.dorsal     | 0.004  | -0.016, 0.024  | 0.41  | 0.679        | 0.869 |
| lh_G_cingul.Post.ventral    | -0.029 | -0.07, 0.013   | -1.37 | 0.173        | 0.593 |
| lh_G_cuneus                 | -0.038 | -0.068, -0.008 | -2.48 | <b>0.013</b> | 0.248 |
| lh_G_front_inf.Opercular    | -0.003 | -0.022, 0.017  | -0.28 | 0.782        | 0.927 |
| lh_G_front_inf.Orbital      | 0.011  | -0.021, 0.042  | 0.68  | 0.498        | 0.801 |
| lh_G_front_inf.Triangul     | 0.001  | -0.025, 0.026  | 0.07  | 0.941        | 0.983 |
| lh_G_front_middle           | -0.002 | -0.021, 0.017  | -0.24 | 0.812        | 0.944 |
| lh_G_front_sup              | -0.004 | -0.019, 0.011  | -0.48 | 0.635        | 0.848 |
| lh_G_Ins_lg_and_S_cent_ins  | 0.002  | -0.018, 0.021  | 0.16  | 0.872        | 0.971 |
| lh_G_insular_short          | -0.005 | -0.023, 0.014  | -0.48 | 0.630        | 0.848 |
| lh_G_occipital_middle       | -0.014 | -0.037, 0.008  | -1.25 | 0.211        | 0.653 |
| lh_G_occipital_sup          | -0.017 | -0.042, 0.008  | -1.33 | 0.186        | 0.600 |
| lh_G_oc.temp_lat.fusifor    | -0.022 | -0.049, 0.004  | -1.64 | 0.101        | 0.593 |
| lh_G_oc.temp_med.Lingual    | -0.030 | -0.064, 0.004  | -1.72 | 0.086        | 0.535 |

**eTable 11. Differences in functional activity between the never-suicidal group and the child-reported suicidality group for anticipation of reward: Welch's t-test**

| ROIs                         | Mean   | 95%CI          | t     | p (unc)      | p FDR |
|------------------------------|--------|----------------|-------|--------------|-------|
| lh_G_oc.temp_med.Parahip     | -0.010 | -0.035, 0.015  | -0.76 | 0.450        | 0.790 |
| lh_G_orbital                 | -0.001 | -0.035, 0.034  | -0.03 | 0.975        | 0.992 |
| lh_G_pariet_inf.Angular      | 0.004  | -0.015, 0.022  | 0.39  | 0.697        | 0.878 |
| lh_G_pariet_inf.Supramar     | -0.018 | -0.035, -0.001 | -2.05 | <b>0.041</b> | 0.401 |
| lh_G_parietal_sup            | -0.006 | -0.026, 0.014  | -0.62 | 0.535        | 0.834 |
| lh_G_postcentral             | -0.017 | -0.037, 0.003  | -1.63 | 0.103        | 0.593 |
| lh_G_precentral              | -0.008 | -0.024, 0.008  | -0.96 | 0.338        | 0.745 |
| lh_G_precuneus               | -0.008 | -0.027, 0.011  | -0.84 | 0.403        | 0.752 |
| lh_G_rectus                  | -0.036 | -0.104, 0.033  | -1.02 | 0.307        | 0.742 |
| lh_G_subcallosal             | 0.004  | -0.031, 0.039  | 0.23  | 0.815        | 0.944 |
| lh_G_temp_sup.G_T_transv     | -0.029 | -0.051, -0.007 | -2.64 | <b>0.009</b> | 0.208 |
| lh_G_temp_sup.Lateral        | -0.007 | -0.024, 0.011  | -0.74 | 0.458        | 0.790 |
| lh_G_temp_sup.Plan_polar     | 0.005  | -0.012, 0.021  | 0.56  | 0.577        | 0.838 |
| lh_G_temp_sup.Plan_tempo     | -0.022 | -0.041, -0.002 | -2.22 | <b>0.027</b> | 0.401 |
| lh_G_temporal_inf            | 0.004  | -0.028, 0.037  | 0.26  | 0.794        | 0.933 |
| lh_G_temporal_middle         | -0.001 | -0.024, 0.021  | -0.10 | 0.919        | 0.982 |
| lh_Lat_Fis.ant.Horizontal    | 0.003  | -0.024, 0.03   | 0.21  | 0.831        | 0.944 |
| lh_Lat_Fis.ant.Vertical      | -0.001 | -0.03, 0.027   | -0.09 | 0.929        | 0.982 |
| lh_Lat_Fis.post              | -0.021 | -0.043, 0.002  | -1.77 | 0.077        | 0.497 |
| lh_Pole_occipital            | -0.024 | -0.066, 0.019  | -1.09 | 0.278        | 0.708 |
| lh_Pole_temporal             | 0.008  | -0.022, 0.037  | 0.51  | 0.611        | 0.848 |
| lh_S_calcarine               | -0.046 | -0.077, -0.016 | -3.01 | <b>0.003</b> | 0.163 |
| lh_S_central                 | -0.024 | -0.047, -0.001 | -2.03 | <b>0.043</b> | 0.401 |
| lh_S_cingul.Marginalis       | -0.026 | -0.045, -0.008 | -2.79 | <b>0.005</b> | 0.183 |
| lh_S_circular_insula_ant     | 0.002  | -0.021, 0.024  | 0.14  | 0.888        | 0.976 |
| lh_S_circular_insula_inf     | -0.013 | -0.031, 0.004  | -1.49 | 0.136        | 0.593 |
| lh_S_circular_insula_sup     | -0.004 | -0.022, 0.013  | -0.49 | 0.626        | 0.848 |
| lh_S_collat_transv_ant       | -0.024 | -0.057, 0.009  | -1.40 | 0.161        | 0.593 |
| lh_S_collat_transv_post      | -0.006 | -0.038, 0.025  | -0.39 | 0.700        | 0.878 |
| lh_S_front_inf               | 0.010  | -0.013, 0.032  | 0.83  | 0.406        | 0.752 |
| lh_S_front_middle            | -0.006 | -0.029, 0.018  | -0.49 | 0.627        | 0.848 |
| lh_S_front_sup               | -0.002 | -0.019, 0.015  | -0.21 | 0.830        | 0.944 |
| lh_S_interm_prim.Jensen      | -0.001 | -0.025, 0.022  | -0.13 | 0.900        | 0.976 |
| lh_S_intrapariet_and_P_trans | -0.008 | -0.028, 0.013  | -0.73 | 0.467        | 0.790 |
| lh_S_oc_middle_and_Lunatus   | -0.020 | -0.049, 0.009  | -1.35 | 0.177        | 0.593 |
| lh_S_oc_sup_and_transversal  | -0.023 | -0.047, 0.001  | -1.87 | 0.062        | 0.451 |
| lh_S_occipital_ant           | -0.009 | -0.03, 0.012   | -0.88 | 0.378        | 0.752 |
| lh_S_oc.temp_lat             | -0.008 | -0.028, 0.013  | -0.74 | 0.461        | 0.790 |
| lh_S_oc.temp_med_and_Lingual | -0.011 | -0.032, 0.009  | -1.13 | 0.260        | 0.697 |
| lh_S_orbital_lateral         | -0.001 | -0.034, 0.032  | -0.04 | 0.971        | 0.992 |
| lh_S_orbital_med.olfact      | 0.014  | -0.041, 0.07   | 0.50  | 0.614        | 0.848 |
| lh_S_orbital.H_Shaped        | -0.004 | -0.031, 0.022  | -0.33 | 0.742        | 0.898 |
| lh_S_parieto_occipital       | -0.027 | -0.048, -0.007 | -2.68 | <b>0.008</b> | 0.208 |

**eTable 11. Differences in functional activity between the never-suicidal group and the child-reported suicidality group for anticipation of reward: Welch's t-test**

| ROIs                        | Mean   | 95%CI          | t     | p (unc)      | p FDR |
|-----------------------------|--------|----------------|-------|--------------|-------|
| lh_S_pericallosal           | -0.012 | -0.035, 0.011  | -1.00 | 0.319        | 0.745 |
| lh_S_postcentral            | -0.015 | -0.033, 0.004  | -1.58 | 0.114        | 0.593 |
| lh_S_precentral.inf.part    | 0.000  | -0.023, 0.023  | 0.00  | 0.998        | 0.998 |
| lh_S_precentral.sup.part    | -0.017 | -0.035, 0.001  | -1.88 | 0.061        | 0.451 |
| lh_S_suborbital             | -0.015 | -0.062, 0.033  | -0.60 | 0.549        | 0.834 |
| lh_S_subparietal            | 0.010  | -0.013, 0.033  | 0.88  | 0.381        | 0.752 |
| lh_S_temporal_inf           | -0.006 | -0.037, 0.026  | -0.35 | 0.729        | 0.895 |
| lh_S_temporal_sup           | -0.008 | -0.025, 0.01   | -0.84 | 0.403        | 0.752 |
| lh_S_temporal_transverse    | -0.028 | -0.056, 0      | -1.95 | 0.052        | 0.432 |
| rh_G_and_S_frontomargin     | -0.014 | -0.055, 0.027  | -0.69 | 0.493        | 0.801 |
| rh_G_and_S_occipital_inf    | -0.015 | -0.047, 0.017  | -0.92 | 0.358        | 0.747 |
| rh_G_and_S_paracental       | -0.021 | -0.042, 0.001  | -1.85 | 0.065        | 0.451 |
| rh_G_and_S_subcentral       | -0.017 | -0.039, 0.005  | -1.53 | 0.127        | 0.593 |
| rh_G_and_S_transv_frontopol | -0.018 | -0.05, 0.014   | -1.10 | 0.271        | 0.706 |
| rh_G_and_S_cingul.Ant       | 0.008  | -0.015, 0.032  | 0.68  | 0.498        | 0.801 |
| rh_G_and_S_cingul.Mid.Ant   | -0.004 | -0.023, 0.015  | -0.44 | 0.659        | 0.853 |
| rh_G_and_S_cingul.Mid.Post  | -0.012 | -0.03, 0.006   | -1.35 | 0.177        | 0.593 |
| rh_G_cingul.Post.dorsal     | -0.005 | -0.025, 0.015  | -0.47 | 0.641        | 0.850 |
| rh_G_cingul.Post.ventral    | -0.033 | -0.065, 0      | -1.98 | <b>0.049</b> | 0.428 |
| rh_G_cuneus                 | -0.022 | -0.051, 0.008  | -1.43 | 0.153        | 0.593 |
| rh_G_front_inf.Opercular    | -0.014 | -0.033, 0.006  | -1.35 | 0.177        | 0.593 |
| rh_G_front_inf.Orbital      | -0.005 | -0.036, 0.026  | -0.32 | 0.747        | 0.898 |
| rh_G_front_inf.Triangul     | -0.001 | -0.024, 0.023  | -0.05 | 0.957        | 0.992 |
| rh_G_front_middle           | -0.005 | -0.025, 0.016  | -0.45 | 0.655        | 0.853 |
| rh_G_front_sup              | -0.005 | -0.02, 0.01    | -0.67 | 0.503        | 0.801 |
| rh_G_Ins_lg_and_S_cent_ins  | -0.016 | -0.036, 0.005  | -1.48 | 0.140        | 0.593 |
| rh_G_insular_short          | -0.010 | -0.028, 0.009  | -1.04 | 0.301        | 0.739 |
| rh_G_occipital_middle       | -0.013 | -0.034, 0.008  | -1.23 | 0.219        | 0.654 |
| rh_G_occipital_sup          | -0.018 | -0.041, 0.005  | -1.56 | 0.118        | 0.593 |
| rh_G_oc.temp_lat.fusifor    | -0.021 | -0.05, 0.008   | -1.45 | 0.147        | 0.593 |
| rh_G_oc.temp_med.Lingual    | -0.035 | -0.068, -0.002 | -2.06 | <b>0.040</b> | 0.401 |
| rh_G_oc.temp_med.Parahip    | 0.016  | -0.012, 0.043  | 1.12  | 0.263        | 0.697 |
| rh_G_orbital                | -0.010 | -0.045, 0.025  | -0.56 | 0.573        | 0.838 |
| rh_G_pariet_inf.Angular     | -0.006 | -0.026, 0.013  | -0.66 | 0.508        | 0.801 |
| rh_G_pariet_inf.Supramar    | -0.025 | -0.042, -0.008 | -2.88 | <b>0.004</b> | 0.172 |
| rh_G_parietal_sup           | -0.009 | -0.028, 0.01   | -0.97 | 0.332        | 0.745 |
| rh_G_postcentral            | -0.012 | -0.031, 0.008  | -1.15 | 0.252        | 0.690 |
| rh_G_precentral             | -0.006 | -0.021, 0.008  | -0.85 | 0.398        | 0.752 |
| rh_G_precuneus              | -0.007 | -0.026, 0.012  | -0.68 | 0.496        | 0.801 |
| rh_G_rectus                 | -0.003 | -0.082, 0.076  | -0.08 | 0.940        | 0.983 |
| rh_G_subcallosal            | 0.019  | -0.018, 0.056  | 1.00  | 0.320        | 0.745 |
| rh_G_temp_sup.G_T_transv    | -0.017 | -0.039, 0.005  | -1.51 | 0.131        | 0.593 |
| rh_G_temp_sup.Lateral       | -0.012 | -0.029, 0.005  | -1.39 | 0.165        | 0.593 |

**eTable 11. Differences in functional activity between the never-suicidal group and the child-reported suicidality group for anticipation of reward: Welch's t-test**

| ROIs                         | Mean   | 95%CI          | t     | p (unc)      | p FDR |
|------------------------------|--------|----------------|-------|--------------|-------|
| rh_G_temp_sup.Plan_polar     | -0.003 | -0.021, 0.015  | -0.35 | 0.723        | 0.895 |
| rh_G_temp_sup.Plan_tempo     | -0.024 | -0.044, -0.005 | -2.48 | <b>0.013</b> | 0.248 |
| rh_G_temporal_inf            | -0.010 | -0.045, 0.025  | -0.57 | 0.567        | 0.838 |
| rh_G_temporal_middle         | -0.012 | -0.033, 0.008  | -1.19 | 0.236        | 0.680 |
| rh_Lat_Fis.ant.Horizontal    | -0.006 | -0.03, 0.018   | -0.46 | 0.647        | 0.851 |
| rh_Lat_Fis.ant.Vertical      | 0.002  | -0.029, 0.033  | 0.12  | 0.908        | 0.979 |
| rh_Lat_Fis.post              | -0.015 | -0.039, 0.009  | -1.23 | 0.218        | 0.654 |
| rh_Pole_occipital            | -0.035 | -0.074, 0.004  | -1.77 | 0.077        | 0.497 |
| rh_Pole_temporal             | 0.015  | -0.018, 0.048  | 0.89  | 0.376        | 0.752 |
| rh_S_calcarine               | -0.037 | -0.069, -0.006 | -2.34 | <b>0.020</b> | 0.326 |
| rh_S_central                 | -0.024 | -0.046, -0.002 | -2.12 | <b>0.035</b> | 0.401 |
| rh_S_cingul.Marginalis       | -0.030 | -0.049, -0.012 | -3.23 | <b>0.001</b> | 0.163 |
| rh_S_circular_insula_ant     | -0.011 | -0.034, 0.012  | -0.94 | 0.348        | 0.745 |
| rh_S_circular_insula_inf     | -0.022 | -0.041, -0.002 | -2.19 | <b>0.029</b> | 0.401 |
| rh_S_circular_insula_sup     | -0.004 | -0.025, 0.016  | -0.41 | 0.681        | 0.869 |
| rh_S_collat_transv_ant       | -0.007 | -0.042, 0.028  | -0.38 | 0.705        | 0.878 |
| rh_S_collat_transv_post      | -0.024 | -0.056, 0.008  | -1.46 | 0.144        | 0.593 |
| rh_S_front_inf               | 0.009  | -0.014, 0.033  | 0.78  | 0.437        | 0.782 |
| rh_S_front_middle            | 0.000  | -0.024, 0.023  | -0.03 | 0.973        | 0.992 |
| rh_S_front_sup               | -0.004 | -0.022, 0.013  | -0.50 | 0.614        | 0.848 |
| rh_S_interm_prim.Jensen      | -0.021 | -0.043, 0.001  | -1.91 | 0.056        | 0.447 |
| rh_S_intrapariet_and_P_trans | -0.014 | -0.033, 0.006  | -1.36 | 0.175        | 0.593 |
| rh_S_oc_middle_and_Lunatus   | -0.024 | -0.054, 0.005  | -1.60 | 0.110        | 0.593 |
| rh_S_oc_sup_and_transversal  | -0.014 | -0.038, 0.01   | -1.18 | 0.240        | 0.680 |
| rh_S_occipital_ant           | -0.016 | -0.036, 0.005  | -1.49 | 0.137        | 0.593 |
| rh_S_oc.temp_lat             | -0.008 | -0.031, 0.014  | -0.73 | 0.468        | 0.790 |
| rh_S_oc.temp_med_and_Lingual | -0.010 | -0.03, 0.01    | -0.96 | 0.336        | 0.745 |
| rh_S_orbital_lateral         | 0.013  | -0.018, 0.045  | 0.83  | 0.405        | 0.752 |
| rh_S_orbital_med.olfact      | 0.042  | -0.016, 0.1    | 1.41  | 0.159        | 0.593 |
| rh_S_orbital.H_Shaped        | -0.003 | -0.031, 0.025  | -0.19 | 0.848        | 0.951 |
| rh_S_parieto_occipital       | -0.032 | -0.053, -0.011 | -2.99 | <b>0.003</b> | 0.163 |
| rh_S_pericallosal            | -0.010 | -0.037, 0.016  | -0.77 | 0.440        | 0.782 |
| rh_S_postcentral             | -0.002 | -0.018, 0.015  | -0.20 | 0.845        | 0.951 |
| rh_S_precentral.inf.part     | -0.009 | -0.031, 0.013  | -0.79 | 0.429        | 0.779 |
| rh_S_precentral.sup.part     | -0.012 | -0.03, 0.005   | -1.36 | 0.174        | 0.593 |
| rh_S_suborbital              | 0.031  | -0.033, 0.095  | 0.96  | 0.338        | 0.745 |
| rh_S_subparietal             | -0.007 | -0.028, 0.015  | -0.59 | 0.557        | 0.837 |
| rh_S_temporal_inf            | -0.019 | -0.053, 0.016  | -1.07 | 0.286        | 0.713 |
| rh_S_temporal_sup            | -0.011 | -0.028, 0.006  | -1.29 | 0.197        | 0.620 |
| rh_S_temporal_transverse     | -0.017 | -0.047, 0.012  | -1.15 | 0.250        | 0.690 |

**Bold** denotes group differences at p<0.05 uncorrected

**eTable 12. Differences in functional activity between the never-suicidal group and the caregiver-reported suicidality group for anticipation of reward: Welch's t-test**

| ROIs                        | Mean   | 95%CI         | t     | p (unc) | p FDR |
|-----------------------------|--------|---------------|-------|---------|-------|
| <b>Subcortical regions</b>  |        |               |       |         |       |
| Left.Cerebellum.Cortex      | 0.012  | -0.017, 0.041 | 0.80  | 0.424   | 0.919 |
| Left.Thalamus.Proper        | 0.010  | -0.008, 0.028 | 1.08  | 0.280   | 0.919 |
| Left.Caudate                | 0.019  | -0.007, 0.046 | 1.45  | 0.149   | 0.919 |
| Left.Putamen                | 0.010  | -0.011, 0.031 | 0.89  | 0.371   | 0.919 |
| Left.Pallidum               | 0.003  | -0.015, 0.021 | 0.29  | 0.774   | 0.950 |
| Brain.Stem                  | 0.004  | -0.017, 0.025 | 0.39  | 0.699   | 0.919 |
| Left.Hippocampus            | 0.008  | -0.01, 0.025  | 0.86  | 0.391   | 0.919 |
| Left.Amygdala               | 0.010  | -0.012, 0.032 | 0.91  | 0.362   | 0.919 |
| Left.Accumbens.area         | 0.013  | -0.017, 0.042 | 0.85  | 0.398   | 0.919 |
| Left.VentralDC              | -0.002 | -0.025, 0.02  | -0.18 | 0.855   | 0.950 |
| Right.Cerebellum.Cortex     | 0.009  | -0.019, 0.037 | 0.63  | 0.531   | 0.919 |
| Right.Thalamus.Proper       | 0.005  | -0.015, 0.024 | 0.47  | 0.639   | 0.919 |
| Right.Caudate               | 0.017  | -0.009, 0.044 | 1.28  | 0.202   | 0.919 |
| Right.Putamen               | 0.016  | -0.005, 0.037 | 1.51  | 0.131   | 0.919 |
| Right.Pallidum              | 0.014  | -0.005, 0.032 | 1.42  | 0.156   | 0.919 |
| Right.Hippocampus           | 0.006  | -0.012, 0.024 | 0.64  | 0.522   | 0.919 |
| Right.Amygdala              | 0.005  | -0.019, 0.029 | 0.40  | 0.688   | 0.919 |
| Right.Accumbens.area        | 0.011  | -0.016, 0.038 | 0.78  | 0.434   | 0.919 |
| Right.VentralDC             | -0.005 | -0.028, 0.018 | -0.44 | 0.659   | 0.919 |
| <b>Cortical regions</b>     |        |               |       |         |       |
| lh_G_and_S_frontomargin     | 0.015  | -0.027, 0.057 | 0.68  | 0.496   | 0.919 |
| lh_G_and_S_occipital_inf    | -0.008 | -0.041, 0.026 | -0.45 | 0.654   | 0.919 |
| lh_G_and_S_paracentral      | 0.004  | -0.017, 0.025 | 0.38  | 0.706   | 0.919 |
| lh_G_and_S_subcentral       | -0.010 | -0.032, 0.013 | -0.86 | 0.390   | 0.919 |
| lh_G_and_S_transv_frontopol | 0.035  | -0.005, 0.074 | 1.74  | 0.083   | 0.919 |
| lh_G_and_S_cingul.Ant       | 0.014  | -0.009, 0.037 | 1.22  | 0.222   | 0.919 |
| lh_G_and_S_cingul.Mid.Ant   | 0.005  | -0.015, 0.024 | 0.47  | 0.639   | 0.919 |
| lh_G_and_S_cingul.Mid.Post  | 0.017  | -0.001, 0.035 | 1.84  | 0.067   | 0.919 |
| lh_G_cingul.Post.dorsal     | 0.021  | -0.001, 0.042 | 1.86  | 0.063   | 0.919 |
| lh_G_cingul.Post.ventral    | 0.005  | -0.038, 0.047 | 0.21  | 0.831   | 0.950 |
| lh_G_cuneus                 | -0.020 | -0.053, 0.012 | -1.22 | 0.222   | 0.919 |
| lh_G_front_inf.Opercular    | 0.005  | -0.015, 0.026 | 0.51  | 0.612   | 0.919 |
| lh_G_front_inf.Orbital      | 0.009  | -0.024, 0.041 | 0.52  | 0.601   | 0.919 |
| lh_G_front_inf.Triangul     | 0.009  | -0.018, 0.036 | 0.66  | 0.512   | 0.919 |
| lh_G_front_middle           | -0.005 | -0.026, 0.017 | -0.43 | 0.670   | 0.919 |
| lh_G_front_sup              | 0.012  | -0.004, 0.028 | 1.46  | 0.145   | 0.919 |
| lh_G_Ins_lg_and_S_cent_ins  | -0.002 | -0.023, 0.018 | -0.22 | 0.826   | 0.950 |
| lh_G_insular_short          | 0.009  | -0.01, 0.027  | 0.94  | 0.347   | 0.919 |
| lh_G_occipital_middle       | -0.006 | -0.029, 0.017 | -0.51 | 0.610   | 0.919 |
| lh_G_occipital_sup          | -0.013 | -0.039, 0.014 | -0.96 | 0.340   | 0.919 |



**eTable 12. Differences in functional activity between the never-suicidal group and the caregiver-reported suicidality group for anticipation of reward: Welch's t-test**

| ROIs                         | Mean   | 95%CI          | t     | p (unc)      | p FDR |
|------------------------------|--------|----------------|-------|--------------|-------|
| lh_G_oc.temp_lat.fusifor     | -0.022 | -0.05, 0.007   | -1.51 | 0.132        | 0.919 |
| lh_G_oc.temp_med.Lingual     | -0.013 | -0.05, 0.023   | -0.73 | 0.466        | 0.919 |
| lh_G_oc.temp_med.Parahip     | -0.004 | -0.028, 0.021  | -0.29 | 0.772        | 0.950 |
| lh_G_orbital                 | 0.015  | -0.021, 0.052  | 0.82  | 0.411        | 0.919 |
| lh_G_pariet_inf.Angular      | 0.012  | -0.008, 0.032  | 1.15  | 0.252        | 0.919 |
| lh_G_pariet_inf.Supramar     | -0.004 | -0.022, 0.014  | -0.41 | 0.682        | 0.919 |
| lh_G_parietal_sup            | 0.007  | -0.012, 0.027  | 0.74  | 0.461        | 0.919 |
| lh_G_postcentral             | 0.000  | -0.022, 0.021  | -0.02 | 0.986        | 0.996 |
| lh_G_precentral              | 0.002  | -0.016, 0.019  | 0.19  | 0.851        | 0.950 |
| lh_G_precuneus               | 0.009  | -0.011, 0.028  | 0.85  | 0.396        | 0.919 |
| lh_G_rectus                  | 0.002  | -0.07, 0.074   | 0.06  | 0.949        | 0.973 |
| lh_G_subcallosal             | 0.007  | -0.031, 0.045  | 0.38  | 0.705        | 0.919 |
| lh_G_temp_sup.G_T_transv     | -0.005 | -0.028, 0.017  | -0.46 | 0.648        | 0.919 |
| lh_G_temp_sup.Lateral        | 0.012  | -0.006, 0.031  | 1.31  | 0.192        | 0.919 |
| lh_G_temp_sup.Plan_polar     | 0.005  | -0.013, 0.023  | 0.54  | 0.587        | 0.919 |
| lh_G_temp_sup.Plan_tempo     | -0.015 | -0.036, 0.006  | -1.44 | 0.151        | 0.919 |
| lh_G_temporal_inf            | 0.000  | -0.034, 0.034  | 0.01  | 0.993        | 0.996 |
| lh_G_temporal_middle         | 0.002  | -0.022, 0.025  | 0.13  | 0.896        | 0.950 |
| lh_Lat_Fis.ant.Horizontal    | 0.014  | -0.014, 0.043  | 1.00  | 0.318        | 0.919 |
| lh_Lat_Fis.ant.Vertical      | 0.004  | -0.026, 0.034  | 0.26  | 0.798        | 0.950 |
| lh_Lat_Fis.post              | -0.017 | -0.04, 0.006   | -1.41 | 0.158        | 0.919 |
| lh_Pole_occipital            | 0.019  | -0.025, 0.064  | 0.85  | 0.394        | 0.919 |
| lh_Pole_temporal             | -0.007 | -0.038, 0.024  | -0.45 | 0.656        | 0.919 |
| lh_S_calcarine               | -0.036 | -0.069, -0.003 | -2.16 | <b>0.032</b> | 0.919 |
| lh_S_central                 | -0.004 | -0.027, 0.019  | -0.34 | 0.735        | 0.924 |
| lh_S_cingul.Marginalis       | -0.007 | -0.026, 0.012  | -0.70 | 0.486        | 0.919 |
| lh_S_circular_insula_ant     | 0.022  | -0.001, 0.045  | 1.86  | 0.064        | 0.919 |
| lh_S_circular_insula_inf     | 0.000  | -0.019, 0.019  | 0.00  | 0.996        | 0.996 |
| lh_S_circular_insula_sup     | -0.004 | -0.024, 0.016  | -0.41 | 0.679        | 0.919 |
| lh_S_collat_transv_ant       | -0.012 | -0.046, 0.022  | -0.69 | 0.494        | 0.919 |
| lh_S_collat_transv_post      | -0.017 | -0.051, 0.018  | -0.96 | 0.337        | 0.919 |
| lh_S_front_inf               | 0.014  | -0.011, 0.04   | 1.08  | 0.279        | 0.919 |
| lh_S_front_middle            | 0.007  | -0.018, 0.031  | 0.53  | 0.598        | 0.919 |
| lh_S_front_sup               | 0.006  | -0.012, 0.024  | 0.61  | 0.542        | 0.919 |
| lh_S_interm_prim.Jensen      | 0.016  | -0.009, 0.042  | 1.25  | 0.212        | 0.919 |
| lh_S_intrapariet_and_P_trans | 0.001  | -0.02, 0.023   | 0.12  | 0.903        | 0.950 |
| lh_S_oc_middle_and_Lunatus   | -0.008 | -0.038, 0.023  | -0.48 | 0.628        | 0.919 |
| lh_S_oc_sup_and_transversal  | -0.016 | -0.041, 0.009  | -1.24 | 0.217        | 0.919 |
| lh_S_occipital_ant           | 0.009  | -0.015, 0.032  | 0.73  | 0.468        | 0.919 |
| lh_S_oc.temp_lat             | -0.014 | -0.035, 0.007  | -1.32 | 0.189        | 0.919 |
| lh_S_oc.temp_med_and_Lingual | -0.014 | -0.034, 0.005  | -1.41 | 0.158        | 0.919 |
| lh_S_orbital_lateral         | 0.012  | -0.021, 0.045  | 0.72  | 0.474        | 0.919 |
| lh_S_orbital_med.olfact      | 0.004  | -0.058, 0.065  | 0.12  | 0.905        | 0.950 |

**eTable 12. Differences in functional activity between the never-suicidal group and the caregiver-reported suicidality group for anticipation of reward: Welch's t-test**

| ROIs                        | Mean   | 95%CI         | t     | p (unc) | p FDR |
|-----------------------------|--------|---------------|-------|---------|-------|
| lh_S_orbital.H_Shaped       | 0.005  | -0.023, 0.033 | 0.35  | 0.723   | 0.924 |
| lh_S_parieto_occipital      | -0.009 | -0.03, 0.012  | -0.80 | 0.424   | 0.919 |
| lh_S_pericallosal           | 0.010  | -0.013, 0.033 | 0.84  | 0.402   | 0.919 |
| lh_S_postcentral            | 0.010  | -0.009, 0.029 | 1.02  | 0.306   | 0.919 |
| lh_S_precentral.inf.part    | 0.009  | -0.014, 0.032 | 0.75  | 0.452   | 0.919 |
| lh_S_precentral.sup.part    | -0.004 | -0.024, 0.015 | -0.43 | 0.668   | 0.919 |
| lh_S_suborbital             | -0.005 | -0.052, 0.042 | -0.20 | 0.842   | 0.950 |
| lh_S_subparietal            | 0.001  | -0.023, 0.026 | 0.10  | 0.921   | 0.956 |
| lh_S_temporal_inf           | 0.002  | -0.031, 0.036 | 0.15  | 0.885   | 0.950 |
| lh_S_temporal_sup           | -0.004 | -0.023, 0.015 | -0.43 | 0.668   | 0.919 |
| lh_S_temporal_transverse    | 0.002  | -0.027, 0.031 | 0.15  | 0.881   | 0.950 |
| rh_G_and_S_frontomargin     | -0.023 | -0.067, 0.02  | -1.05 | 0.294   | 0.919 |
| rh_G_and_S_occipital_inf    | -0.008 | -0.041, 0.026 | -0.45 | 0.655   | 0.919 |
| rh_G_and_S_paracentral      | -0.001 | -0.023, 0.021 | -0.08 | 0.934   | 0.963 |
| rh_G_and_S_subcentral       | -0.003 | -0.028, 0.021 | -0.28 | 0.780   | 0.950 |
| rh_G_and_S_transv_frontopol | 0.017  | -0.016, 0.049 | 0.99  | 0.322   | 0.919 |
| rh_G_and_S_cingul.Ant       | 0.017  | -0.007, 0.041 | 1.38  | 0.169   | 0.919 |
| rh_G_and_S_cingul.Mid.Ant   | 0.000  | -0.019, 0.02  | 0.01  | 0.989   | 0.996 |
| rh_G_and_S_cingul.Mid.Post  | 0.002  | -0.016, 0.02  | 0.18  | 0.856   | 0.950 |
| rh_G_cingul.Post.dorsal     | 0.006  | -0.015, 0.026 | 0.56  | 0.576   | 0.919 |
| rh_G_cingul.Post.ventral    | 0.010  | -0.025, 0.045 | 0.58  | 0.563   | 0.919 |
| rh_G_cuneus                 | -0.010 | -0.041, 0.021 | -0.62 | 0.534   | 0.919 |
| rh_G_front_inf.Opercular    | 0.011  | -0.009, 0.03  | 1.06  | 0.292   | 0.919 |
| rh_G_front_inf.Orbital      | 0.014  | -0.017, 0.044 | 0.90  | 0.369   | 0.919 |
| rh_G_front_inf.Triangul     | 0.014  | -0.01, 0.039  | 1.15  | 0.252   | 0.919 |
| rh_G_front_middle           | 0.012  | -0.01, 0.033  | 1.07  | 0.285   | 0.919 |
| rh_G_front_sup              | 0.005  | -0.012, 0.021 | 0.56  | 0.579   | 0.919 |
| rh_G_Ins_lg_and_S_cent_ins  | 0.004  | -0.018, 0.026 | 0.38  | 0.705   | 0.919 |
| rh_G_insular_short          | 0.008  | -0.012, 0.027 | 0.78  | 0.436   | 0.919 |
| rh_G_occipital_middle       | -0.004 | -0.026, 0.019 | -0.34 | 0.736   | 0.924 |
| rh_G_occipital_sup          | -0.007 | -0.033, 0.019 | -0.54 | 0.591   | 0.919 |
| rh_G_oc.temp_lat.fusifor    | -0.006 | -0.035, 0.022 | -0.43 | 0.668   | 0.919 |
| rh_G_oc.temp_med.Lingual    | -0.026 | -0.061, 0.009 | -1.46 | 0.145   | 0.919 |
| rh_G_oc.temp_med.Parahip    | 0.012  | -0.014, 0.038 | 0.91  | 0.361   | 0.919 |
| rh_G_orbital                | 0.011  | -0.028, 0.05  | 0.56  | 0.575   | 0.919 |
| rh_G_pariet_inf.Angular     | 0.006  | -0.014, 0.026 | 0.59  | 0.558   | 0.919 |
| rh_G_pariet_inf.Supramar    | 0.004  | -0.014, 0.023 | 0.45  | 0.653   | 0.919 |
| rh_G_parietal_sup           | 0.006  | -0.014, 0.026 | 0.57  | 0.570   | 0.919 |
| rh_G_postcentral            | -0.006 | -0.026, 0.015 | -0.53 | 0.596   | 0.919 |
| rh_G_precentral             | 0.010  | -0.007, 0.026 | 1.14  | 0.257   | 0.919 |
| rh_G_precuneus              | 0.007  | -0.013, 0.027 | 0.70  | 0.483   | 0.919 |
| rh_G_rectus                 | -0.018 | -0.104, 0.068 | -0.40 | 0.687   | 0.919 |
| rh_G_subcallosal            | 0.015  | -0.02, 0.051  | 0.84  | 0.404   | 0.919 |

**eTable 12. Differences in functional activity between the never-suicidal group and the caregiver-reported suicidality group for anticipation of reward: Welch's t-test**

| ROIs                         | Mean   | 95%CI          | t     | p (unc)      | p FDR |
|------------------------------|--------|----------------|-------|--------------|-------|
| rh_G_temp_sup.G_T_transv     | 0.005  | -0.018, 0.028  | 0.46  | 0.646        | 0.919 |
| rh_G_temp_sup.Lateral        | -0.001 | -0.019, 0.017  | -0.13 | 0.899        | 0.950 |
| rh_G_temp_sup.Plan_polar     | 0.002  | -0.016, 0.02   | 0.22  | 0.826        | 0.950 |
| rh_G_temp_sup.Plan_tempo     | 0.005  | -0.016, 0.025  | 0.43  | 0.669        | 0.919 |
| rh_G_temporal_inf            | 0.003  | -0.031, 0.038  | 0.19  | 0.849        | 0.950 |
| rh_G_temporal_middle         | 0.012  | -0.009, 0.033  | 1.11  | 0.267        | 0.919 |
| rh_Lat_Fis.ant.Horizontal    | -0.003 | -0.029, 0.023  | -0.22 | 0.824        | 0.950 |
| rh_Lat_Fis.ant.Vertical      | 0.018  | -0.014, 0.051  | 1.10  | 0.273        | 0.919 |
| rh_Lat_Fis.post              | -0.001 | -0.025, 0.023  | -0.10 | 0.922        | 0.956 |
| rh_Pole_occipital            | 0.012  | -0.029, 0.052  | 0.56  | 0.578        | 0.919 |
| rh_Pole_temporal             | 0.005  | -0.03, 0.039   | 0.26  | 0.796        | 0.950 |
| rh_S_calcarine               | -0.034 | -0.067, -0.002 | -2.11 | <b>0.035</b> | 0.919 |
| rh_S_central                 | -0.014 | -0.037, 0.01   | -1.13 | 0.259        | 0.919 |
| rh_S_cingul.Marginalis       | -0.010 | -0.03, 0.009   | -1.03 | 0.305        | 0.919 |
| rh_S_circular_insula_ant     | 0.006  | -0.017, 0.029  | 0.54  | 0.591        | 0.919 |
| rh_S_circular_insula_inf     | -0.004 | -0.024, 0.016  | -0.37 | 0.710        | 0.919 |
| rh_S_circular_insula_sup     | 0.007  | -0.014, 0.027  | 0.65  | 0.517        | 0.919 |
| rh_S_collat_transv_ant       | 0.038  | 0, 0.076       | 1.95  | 0.052        | 0.919 |
| rh_S_collat_transv_post      | -0.014 | -0.048, 0.019  | -0.85 | 0.395        | 0.919 |
| rh_S_front_inf               | 0.011  | -0.014, 0.036  | 0.88  | 0.377        | 0.919 |
| rh_S_front_middle            | 0.010  | -0.015, 0.035  | 0.78  | 0.436        | 0.919 |
| rh_S_front_sup               | 0.009  | -0.009, 0.027  | 1.00  | 0.317        | 0.919 |
| rh_S_interm_prim.Jensen      | -0.003 | -0.026, 0.02   | -0.25 | 0.800        | 0.950 |
| rh_S_intrapariet_and_P_trans | 0.005  | -0.015, 0.025  | 0.52  | 0.604        | 0.919 |
| rh_S_oc_middle_and_Lunatus   | -0.002 | -0.032, 0.028  | -0.14 | 0.889        | 0.950 |
| rh_S_oc_sup_and_transversal  | -0.007 | -0.032, 0.017  | -0.59 | 0.555        | 0.919 |
| rh_S_occipital_ant           | -0.002 | -0.024, 0.02   | -0.17 | 0.865        | 0.950 |
| rh_S_oc.temp_lat             | 0.002  | -0.02, 0.024   | 0.14  | 0.885        | 0.950 |
| rh_S_oc.temp_med_and_Lingual | -0.005 | -0.026, 0.016  | -0.48 | 0.632        | 0.919 |
| rh_S_orbital_lateral         | 0.034  | 0.001, 0.068   | 2.03  | <b>0.043</b> | 0.919 |
| rh_S_orbital_med.olfact      | 0.049  | -0.014, 0.111  | 1.53  | 0.126        | 0.919 |
| rh_S_orbital.H_Shaped        | 0.019  | -0.01, 0.048   | 1.32  | 0.189        | 0.919 |
| rh_S_parieto_occipital       | -0.014 | -0.035, 0.007  | -1.30 | 0.194        | 0.919 |
| rh_S_pericallosal            | 0.018  | -0.009, 0.044  | 1.29  | 0.196        | 0.919 |
| rh_S_postcentral             | 0.004  | -0.015, 0.022  | 0.39  | 0.694        | 0.919 |
| rh_S_precentral.inf.part     | 0.009  | -0.014, 0.031  | 0.73  | 0.466        | 0.919 |
| rh_S_precentral.sup.part     | 0.012  | -0.007, 0.03   | 1.23  | 0.220        | 0.919 |
| rh_S_suborbital              | 0.012  | -0.056, 0.08   | 0.34  | 0.733        | 0.924 |
| rh_S_subparietal             | 0.004  | -0.019, 0.027  | 0.33  | 0.744        | 0.927 |
| rh_S_temporal_inf            | 0.029  | -0.006, 0.064  | 1.65  | 0.100        | 0.919 |
| rh_S_temporal_sup            | 0.008  | -0.01, 0.025   | 0.87  | 0.384        | 0.919 |
| rh_S_temporal_transverse     | -0.004 | -0.035, 0.028  | -0.24 | 0.807        | 0.950 |

**Bold** denotes group differences at p<0.05 uncorrected

**eTable 13. Differences in functional activity between the never-suicidal group and the concordantly-reported suicidality group for anticipation of reward: Welch's t-test**

| ROIs                        | Mean   | 95%CI          | t     | p (unc)      | p FDR |
|-----------------------------|--------|----------------|-------|--------------|-------|
| <b>Subcortical regions</b>  |        |                |       |              |       |
| Left.Cerebellum.Cortex      | -0.022 | -0.078, 0.035  | -0.76 | 0.450        | 0.974 |
| Left.Thalamus.Proper        | -0.006 | -0.044, 0.032  | -0.31 | 0.754        | 0.974 |
| Left.Caudate                | 0.008  | -0.044, 0.06   | 0.30  | 0.763        | 0.974 |
| Left.Putamen                | -0.009 | -0.047, 0.03   | -0.44 | 0.660        | 0.974 |
| Left.Pallidum               | 0.008  | -0.027, 0.044  | 0.46  | 0.643        | 0.974 |
| Brain.Stem                  | -0.009 | -0.045, 0.028  | -0.48 | 0.635        | 0.974 |
| Left.Hippocampus            | 0.000  | -0.032, 0.033  | 0.02  | 0.987        | 0.994 |
| Left.Amygdala               | 0.001  | -0.04, 0.043   | 0.07  | 0.944        | 0.988 |
| Left.Accumbens.area         | 0.038  | -0.022, 0.098  | 1.25  | 0.213        | 0.974 |
| Left.VentralDC              | -0.019 | -0.06, 0.022   | -0.92 | 0.358        | 0.974 |
| Right.Cerebellum.Cortex     | 0.022  | -0.031, 0.076  | 0.82  | 0.414        | 0.974 |
| Right.Thalamus.Proper       | -0.003 | -0.042, 0.036  | -0.14 | 0.887        | 0.974 |
| Right.Caudate               | 0.030  | -0.025, 0.086  | 1.08  | 0.282        | 0.974 |
| Right.Putamen               | 0.012  | -0.029, 0.053  | 0.58  | 0.566        | 0.974 |
| Right.Pallidum              | 0.016  | -0.015, 0.048  | 1.02  | 0.309        | 0.974 |
| Right.Hippocampus           | -0.002 | -0.037, 0.033  | -0.10 | 0.918        | 0.974 |
| Right.Amygdala              | 0.000  | -0.052, 0.051  | -0.02 | 0.985        | 0.994 |
| Right.Accumbens.area        | 0.029  | -0.024, 0.083  | 1.09  | 0.278        | 0.974 |
| Right.VentralDC             | 0.006  | -0.041, 0.052  | 0.24  | 0.814        | 0.974 |
| <b>Cortical regions</b>     |        |                |       |              |       |
| lh_G_and_S_frontomargin     | 0.023  | -0.061, 0.108  | 0.55  | 0.585        | 0.974 |
| lh_G_and_S_occipital_inf    | -0.038 | -0.103, 0.026  | -1.18 | 0.239        | 0.974 |
| lh_G_and_S_paracentral      | -0.018 | -0.06, 0.023   | -0.86 | 0.390        | 0.974 |
| lh_G_and_S_subcentral       | -0.024 | -0.072, 0.024  | -1.00 | 0.319        | 0.974 |
| lh_G_and_S_transv_frontopol | 0.023  | -0.054, 0.101  | 0.60  | 0.549        | 0.974 |
| lh_G_and_S_cingul.Ant       | 0.000  | -0.046, 0.047  | 0.00  | 0.998        | 0.998 |
| lh_G_and_S_cingul.Mid.Ant   | 0.016  | -0.025, 0.057  | 0.76  | 0.448        | 0.974 |
| lh_G_and_S_cingul.Mid.Post  | 0.002  | -0.036, 0.041  | 0.11  | 0.913        | 0.974 |
| lh_G_cingul.Post.dorsal     | 0.022  | -0.02, 0.063   | 1.03  | 0.305        | 0.974 |
| lh_G_cingul.Post.ventral    | -0.065 | -0.14, 0.01    | -1.72 | 0.088        | 0.974 |
| lh_G_cuneus                 | -0.064 | -0.124, -0.004 | -2.11 | <b>0.038</b> | 0.928 |
| lh_G_front_inf.Opercular    | -0.016 | -0.059, 0.027  | -0.76 | 0.451        | 0.974 |
| lh_G_front_inf.Orbital      | -0.024 | -0.095, 0.047  | -0.67 | 0.504        | 0.974 |
| lh_G_front_inf.Triangul     | 0.017  | -0.036, 0.07   | 0.63  | 0.530        | 0.974 |
| lh_G_front_middle           | -0.009 | -0.049, 0.031  | -0.46 | 0.648        | 0.974 |
| lh_G_front_sup              | -0.005 | -0.037, 0.028  | -0.30 | 0.763        | 0.974 |
| lh_G_Ins_lg_and_S_cent_ins  | -0.034 | -0.074, 0.007  | -1.63 | 0.107        | 0.974 |
| lh_G_insular_short          | 0.002  | -0.034, 0.038  | 0.10  | 0.921        | 0.974 |

**eTable 13. Differences in functional activity between the never-suicidal group and the concordantly-reported suicidality group for anticipation of reward: Welch's t-test**

| ROIs                         | Mean   | 95%CI          | t     | p (unc)      | p FDR |
|------------------------------|--------|----------------|-------|--------------|-------|
| lh_G_occipital_middle        | -0.017 | -0.06, 0.025   | -0.82 | 0.414        | 0.974 |
| lh_G_occipital_sup           | -0.016 | -0.068, 0.036  | -0.60 | 0.550        | 0.974 |
| lh_G_oc.temp_lat.fusifor     | -0.031 | -0.086, 0.023  | -1.15 | 0.252        | 0.974 |
| lh_G_oc.temp_med.Lingual     | -0.053 | -0.122, 0.016  | -1.52 | 0.131        | 0.974 |
| lh_G_oc.temp_med.Parahip     | -0.040 | -0.088, 0.009  | -1.63 | 0.106        | 0.974 |
| lh_G_orbital                 | -0.004 | -0.07, 0.061   | -0.13 | 0.898        | 0.974 |
| lh_G_pariet_inf.Angular      | 0.005  | -0.029, 0.04   | 0.30  | 0.762        | 0.974 |
| lh_G_pariet_inf.Supramar     | -0.029 | -0.065, 0.008  | -1.57 | 0.120        | 0.974 |
| lh_G_parietal_sup            | 0.002  | -0.035, 0.04   | 0.13  | 0.896        | 0.974 |
| lh_G_postcentral             | -0.011 | -0.052, 0.029  | -0.56 | 0.578        | 0.974 |
| lh_G_precentral              | -0.011 | -0.045, 0.023  | -0.62 | 0.538        | 0.974 |
| lh_G_precuneus               | -0.009 | -0.046, 0.028  | -0.47 | 0.636        | 0.974 |
| lh_G_rectus                  | -0.056 | -0.204, 0.093  | -0.75 | 0.457        | 0.974 |
| lh_G_subcallosal             | -0.007 | -0.081, 0.068  | -0.17 | 0.863        | 0.974 |
| lh_G_temp_sup.G_T_transv     | -0.042 | -0.087, 0.003  | -1.86 | 0.066        | 0.974 |
| lh_G_temp_sup.Lateral        | -0.008 | -0.044, 0.029  | -0.42 | 0.679        | 0.974 |
| lh_G_temp_sup.Plan_polar     | 0.009  | -0.025, 0.044  | 0.54  | 0.589        | 0.974 |
| lh_G_temp_sup.Plan_tempo     | -0.047 | -0.087, -0.006 | -2.30 | <b>0.024</b> | 0.916 |
| lh_G_temporal_inf            | -0.014 | -0.084, 0.057  | -0.39 | 0.701        | 0.974 |
| lh_G_temporal_middle         | -0.021 | -0.069, 0.028  | -0.85 | 0.399        | 0.974 |
| lh_Lat_Fis.ant.Horizontal    | -0.005 | -0.063, 0.053  | -0.18 | 0.856        | 0.974 |
| lh_Lat_Fis.ant.Vertical      | -0.029 | -0.092, 0.034  | -0.91 | 0.366        | 0.974 |
| lh_Lat_Fis.post              | -0.013 | -0.058, 0.031  | -0.59 | 0.560        | 0.974 |
| lh_Pole_occipital            | 0.024  | -0.06, 0.109   | 0.57  | 0.570        | 0.974 |
| lh_Pole_temporal             | -0.003 | -0.061, 0.055  | -0.11 | 0.916        | 0.974 |
| lh_S_calcarine               | -0.103 | -0.166, -0.04  | -3.24 | <b>0.002</b> | 0.267 |
| lh_S_central                 | -0.038 | -0.088, 0.011  | -1.55 | 0.125        | 0.974 |
| lh_S_cingul.Marginalis       | -0.032 | -0.069, 0.005  | -1.71 | 0.091        | 0.974 |
| lh_S_circular_insula_ant     | 0.008  | -0.041, 0.058  | 0.33  | 0.743        | 0.974 |
| lh_S_circular_insula_inf     | -0.027 | -0.063, 0.009  | -1.50 | 0.136        | 0.974 |
| lh_S_circular_insula_sup     | -0.002 | -0.041, 0.037  | -0.11 | 0.910        | 0.974 |
| lh_S_collat_transv_ant       | -0.007 | -0.072, 0.059  | -0.20 | 0.843        | 0.974 |
| lh_S_collat_transv_post      | -0.017 | -0.083, 0.049  | -0.52 | 0.601        | 0.974 |
| lh_S_front_inf               | 0.001  | -0.049, 0.05   | 0.03  | 0.977        | 0.994 |
| lh_S_front_middle            | -0.001 | -0.051, 0.049  | -0.03 | 0.976        | 0.994 |
| lh_S_front_sup               | -0.012 | -0.049, 0.024  | -0.67 | 0.504        | 0.974 |
| lh_S_interm_prim.Jensen      | -0.026 | -0.077, 0.025  | -1.00 | 0.322        | 0.974 |
| lh_S_intrapariet_and_P_trans | 0.004  | -0.034, 0.043  | 0.21  | 0.833        | 0.974 |
| lh_S_oc_middle_and_Lunatus   | -0.028 | -0.083, 0.027  | -1.02 | 0.311        | 0.974 |
| lh_S_oc_sup_and_transversal  | -0.028 | -0.076, 0.02   | -1.16 | 0.249        | 0.974 |
| lh_S_occipital_ant           | -0.014 | -0.058, 0.029  | -0.64 | 0.522        | 0.974 |
| lh_S_oc.temp_lat             | -0.022 | -0.061, 0.017  | -1.12 | 0.268        | 0.974 |
| lh_S_oc.temp_med_and_Lingual | -0.025 | -0.064, 0.013  | -1.31 | 0.192        | 0.974 |

**eTable 13. Differences in functional activity between the never-suicidal group and the concordantly-reported suicidality group for anticipation of reward: Welch's t-test**

| ROIs                        | Mean   | 95%CI          | t     | p (unc)      | p FDR |
|-----------------------------|--------|----------------|-------|--------------|-------|
| lh_S_orbital_lateral        | -0.016 | -0.081, 0.049  | -0.49 | 0.627        | 0.974 |
| lh_S_orbital_med.olfact     | 0.020  | -0.105, 0.144  | 0.31  | 0.755        | 0.974 |
| lh_S_orbital.H_Shaped       | -0.019 | -0.077, 0.038  | -0.67 | 0.507        | 0.974 |
| lh_S_parieto_occipital      | -0.045 | -0.082, -0.007 | -2.36 | <b>0.020</b> | 0.916 |
| lh_S_pericallosal           | -0.007 | -0.055, 0.04   | -0.32 | 0.753        | 0.974 |
| lh_S_postcentral            | 0.004  | -0.035, 0.043  | 0.19  | 0.851        | 0.974 |
| lh_S_precentral.inf.part    | 0.003  | -0.042, 0.049  | 0.15  | 0.880        | 0.974 |
| lh_S_precentral.sup.part    | -0.018 | -0.058, 0.022  | -0.89 | 0.378        | 0.974 |
| lh_S_suborbital             | -0.031 | -0.13, 0.068   | -0.62 | 0.537        | 0.974 |
| lh_S_subparietal            | -0.004 | -0.049, 0.041  | -0.18 | 0.856        | 0.974 |
| lh_S_temporal_inf           | -0.035 | -0.098, 0.029  | -1.09 | 0.280        | 0.974 |
| lh_S_temporal_sup           | -0.024 | -0.062, 0.014  | -1.26 | 0.209        | 0.974 |
| lh_S_temporal_transverse    | -0.053 | -0.108, 0.002  | -1.91 | 0.060        | 0.974 |
| rh_G_and_S_frontomargin     | -0.022 | -0.108, 0.065  | -0.50 | 0.621        | 0.974 |
| rh_G_and_S_occipital_inf    | -0.031 | -0.09, 0.029   | -1.02 | 0.311        | 0.974 |
| rh_G_and_S_paracentral      | -0.018 | -0.06, 0.024   | -0.86 | 0.393        | 0.974 |
| rh_G_and_S_subcentral       | -0.030 | -0.076, 0.016  | -1.30 | 0.197        | 0.974 |
| rh_G_and_S_transv_frontopol | -0.040 | -0.104, 0.024  | -1.25 | 0.214        | 0.974 |
| rh_G_and_S_cingul.Ant       | 0.030  | -0.019, 0.08   | 1.22  | 0.227        | 0.974 |
| rh_G_and_S_cingul.Mid.Ant   | 0.008  | -0.031, 0.048  | 0.42  | 0.679        | 0.974 |
| rh_G_and_S_cingul.Mid.Post  | -0.013 | -0.05, 0.023   | -0.74 | 0.462        | 0.974 |
| rh_G_cingul.Post.dorsal     | 0.016  | -0.02, 0.053   | 0.88  | 0.379        | 0.974 |
| rh_G_cingul.Post.ventral    | -0.031 | -0.09, 0.029   | -1.02 | 0.311        | 0.974 |
| rh_G_cuneus                 | -0.050 | -0.107, 0.008  | -1.70 | 0.092        | 0.974 |
| rh_G_front_inf.Opercular    | 0.002  | -0.037, 0.041  | 0.11  | 0.913        | 0.974 |
| rh_G_front_inf.Orbital      | -0.007 | -0.067, 0.053  | -0.23 | 0.816        | 0.974 |
| rh_G_front_inf.Triangul     | -0.001 | -0.043, 0.04   | -0.06 | 0.954        | 0.989 |
| rh_G_front_middle           | 0.014  | -0.027, 0.054  | 0.66  | 0.509        | 0.974 |
| rh_G_front_sup              | -0.007 | -0.039, 0.025  | -0.44 | 0.659        | 0.974 |
| rh_G_Ins_lg_and_S_cent_ins  | -0.015 | -0.058, 0.027  | -0.71 | 0.480        | 0.974 |
| rh_G_insular_short          | -0.005 | -0.045, 0.035  | -0.27 | 0.788        | 0.974 |
| rh_G_occipital_middle       | -0.003 | -0.041, 0.035  | -0.16 | 0.870        | 0.974 |
| rh_G_occipital_sup          | -0.032 | -0.076, 0.012  | -1.43 | 0.157        | 0.974 |
| rh_G_oc.temp_lat.fusifor    | -0.041 | -0.094, 0.013  | -1.52 | 0.133        | 0.974 |
| rh_G_oc.temp_med.Lingual    | -0.075 | -0.141, -0.008 | -2.24 | <b>0.027</b> | 0.916 |
| rh_G_oc.temp_med.Parahip    | 0.006  | -0.044, 0.057  | 0.25  | 0.803        | 0.974 |
| rh_G_orbital                | 0.024  | -0.052, 0.1    | 0.63  | 0.532        | 0.974 |
| rh_G_pariet_inf.Angular     | 0.003  | -0.031, 0.037  | 0.17  | 0.864        | 0.974 |
| rh_G_pariet_inf.Supramar    | -0.008 | -0.046, 0.029  | -0.44 | 0.659        | 0.974 |
| rh_G_parietal_sup           | 0.000  | -0.039, 0.038  | -0.01 | 0.988        | 0.994 |
| rh_G_postcentral            | -0.015 | -0.054, 0.023  | -0.79 | 0.434        | 0.974 |
| rh_G_precentral             | -0.003 | -0.034, 0.028  | -0.18 | 0.858        | 0.974 |
| rh_G_precuneus              | 0.003  | -0.03, 0.036   | 0.18  | 0.855        | 0.974 |

**eTable 13. Differences in functional activity between the never-suicidal group and the concordantly-reported suicidality group for anticipation of reward: Welch's t-test**

| ROIs                         | Mean   | 95%CI          | t     | p (unc)      | p FDR |
|------------------------------|--------|----------------|-------|--------------|-------|
| rh_G_rectus                  | 0.015  | -0.138, 0.167  | 0.19  | 0.849        | 0.974 |
| rh_G_subcallosal             | 0.018  | -0.058, 0.095  | 0.47  | 0.638        | 0.974 |
| rh_G_temp_sup.G_T_transv     | -0.027 | -0.073, 0.019  | -1.18 | 0.243        | 0.974 |
| rh_G_temp_sup.Lateral        | -0.017 | -0.051, 0.018  | -0.95 | 0.343        | 0.974 |
| rh_G_temp_sup.Plan_polar     | 0.012  | -0.021, 0.045  | 0.70  | 0.486        | 0.974 |
| rh_G_temp_sup.Plan_tempo     | -0.018 | -0.056, 0.019  | -0.96 | 0.339        | 0.974 |
| rh_G_temporal_inf            | -0.004 | -0.066, 0.059  | -0.11 | 0.911        | 0.974 |
| rh_G_temporal_middle         | 0.009  | -0.032, 0.049  | 0.42  | 0.676        | 0.974 |
| rh_Lat_Fis.ant.Horizontal    | -0.012 | -0.058, 0.033  | -0.54 | 0.591        | 0.974 |
| rh_Lat_Fis.ant.Vertical      | -0.019 | -0.079, 0.041  | -0.63 | 0.532        | 0.974 |
| rh_Lat_Fis.post              | -0.005 | -0.051, 0.042  | -0.20 | 0.845        | 0.974 |
| rh_Pole_occipital            | 0.013  | -0.066, 0.092  | 0.32  | 0.748        | 0.974 |
| rh_Pole_temporal             | 0.039  | -0.025, 0.102  | 1.21  | 0.228        | 0.974 |
| rh_S_calcarine               | -0.086 | -0.143, -0.029 | -3.00 | <b>0.003</b> | 0.284 |
| rh_S_central                 | -0.043 | -0.09, 0.005   | -1.77 | 0.079        | 0.974 |
| rh_S_cingul.Marginalis       | -0.023 | -0.06, 0.013   | -1.29 | 0.201        | 0.974 |
| rh_S_circular_insula_ant     | -0.005 | -0.052, 0.041  | -0.23 | 0.815        | 0.974 |
| rh_S_circular_insula_inf     | -0.002 | -0.042, 0.037  | -0.12 | 0.907        | 0.974 |
| rh_S_circular_insula_sup     | 0.006  | -0.033, 0.046  | 0.32  | 0.752        | 0.974 |
| rh_S_collat_transv_ant       | 0.008  | -0.069, 0.085  | 0.21  | 0.837        | 0.974 |
| rh_S_collat_transv_post      | -0.046 | -0.109, 0.017  | -1.46 | 0.147        | 0.974 |
| rh_S_front_inf               | 0.024  | -0.023, 0.071  | 1.02  | 0.310        | 0.974 |
| rh_S_front_middle            | 0.010  | -0.036, 0.056  | 0.41  | 0.680        | 0.974 |
| rh_S_front_sup               | 0.006  | -0.029, 0.041  | 0.34  | 0.733        | 0.974 |
| rh_S_interm_prim.Jensen      | -0.025 | -0.068, 0.019  | -1.13 | 0.262        | 0.974 |
| rh_S_intrapariet_and_P_trans | 0.002  | -0.032, 0.036  | 0.12  | 0.906        | 0.974 |
| rh_S_oc_middle_and_Lunatus   | -0.014 | -0.072, 0.045  | -0.46 | 0.643        | 0.974 |
| rh_S_oc_sup_and_transversal  | -0.044 | -0.09, 0.003   | -1.87 | 0.064        | 0.974 |
| rh_S_occipital_ant           | -0.003 | -0.041, 0.035  | -0.16 | 0.873        | 0.974 |
| rh_S_oc.temp_lat             | -0.021 | -0.064, 0.021  | -1.01 | 0.317        | 0.974 |
| rh_S_oc.temp_med_and_Lingual | -0.022 | -0.062, 0.017  | -1.11 | 0.269        | 0.974 |
| rh_S_orbital_lateral         | 0.028  | -0.032, 0.089  | 0.94  | 0.350        | 0.974 |
| rh_S_orbital_med.olfact      | 0.109  | -0.012, 0.229  | 1.79  | 0.076        | 0.974 |
| rh_S_orbital.H_Shaped        | 0.021  | -0.034, 0.076  | 0.76  | 0.447        | 0.974 |
| rh_S_parieto_occipital       | -0.041 | -0.081, -0.002 | -2.09 | <b>0.039</b> | 0.928 |
| rh_S_pericallosal            | 0.016  | -0.039, 0.071  | 0.58  | 0.563        | 0.974 |
| rh_S_postcentral             | 0.007  | -0.024, 0.038  | 0.44  | 0.662        | 0.974 |
| rh_S_precentral.inf.part     | 0.003  | -0.04, 0.046   | 0.13  | 0.894        | 0.974 |
| rh_S_precentral.sup.part     | -0.003 | -0.042, 0.036  | -0.14 | 0.886        | 0.974 |
| rh_S_suborbital              | 0.047  | -0.082, 0.176  | 0.73  | 0.468        | 0.974 |
| rh_S_subparietal             | -0.009 | -0.051, 0.033  | -0.42 | 0.674        | 0.974 |
| rh_S_temporal_inf            | -0.002 | -0.074, 0.069  | -0.07 | 0.946        | 0.988 |
| rh_S_temporal_sup            | -0.009 | -0.042, 0.024  | -0.55 | 0.584        | 0.974 |

**eTable 13. Differences in functional activity between the never-suicidal group and the concordantly-reported suicidality group for anticipation of reward: Welch's t-test**

| ROIs                     | Mean   | 95%CI         | t     | p (unc) | p FDR |
|--------------------------|--------|---------------|-------|---------|-------|
| rh_S_temporal_transverse | -0.027 | -0.082, 0.028 | -0.97 | 0.336   | 0.974 |

**Bold** denotes group differences at  $p < 0.05$  uncorrected

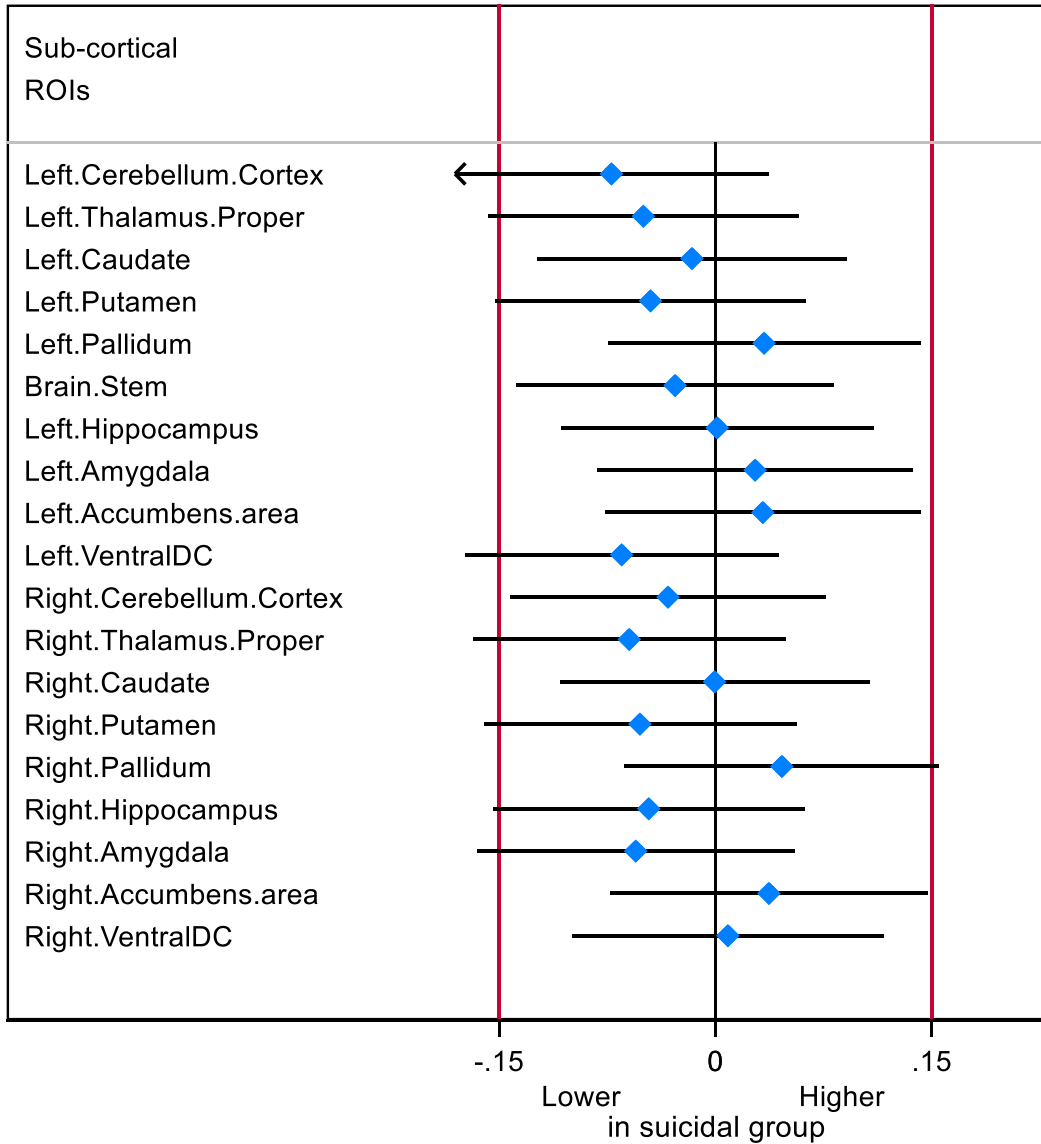

**eFigure 12.** Results of the Equivalence test for differences in functional activity in subcortical regions between the never-suicidal group and the child-reported suicidality group for anticipation of reward. The figure shows the effect sizes and 95% confidence intervals of the difference against the interval of equivalence (-0.15 to 0.15).



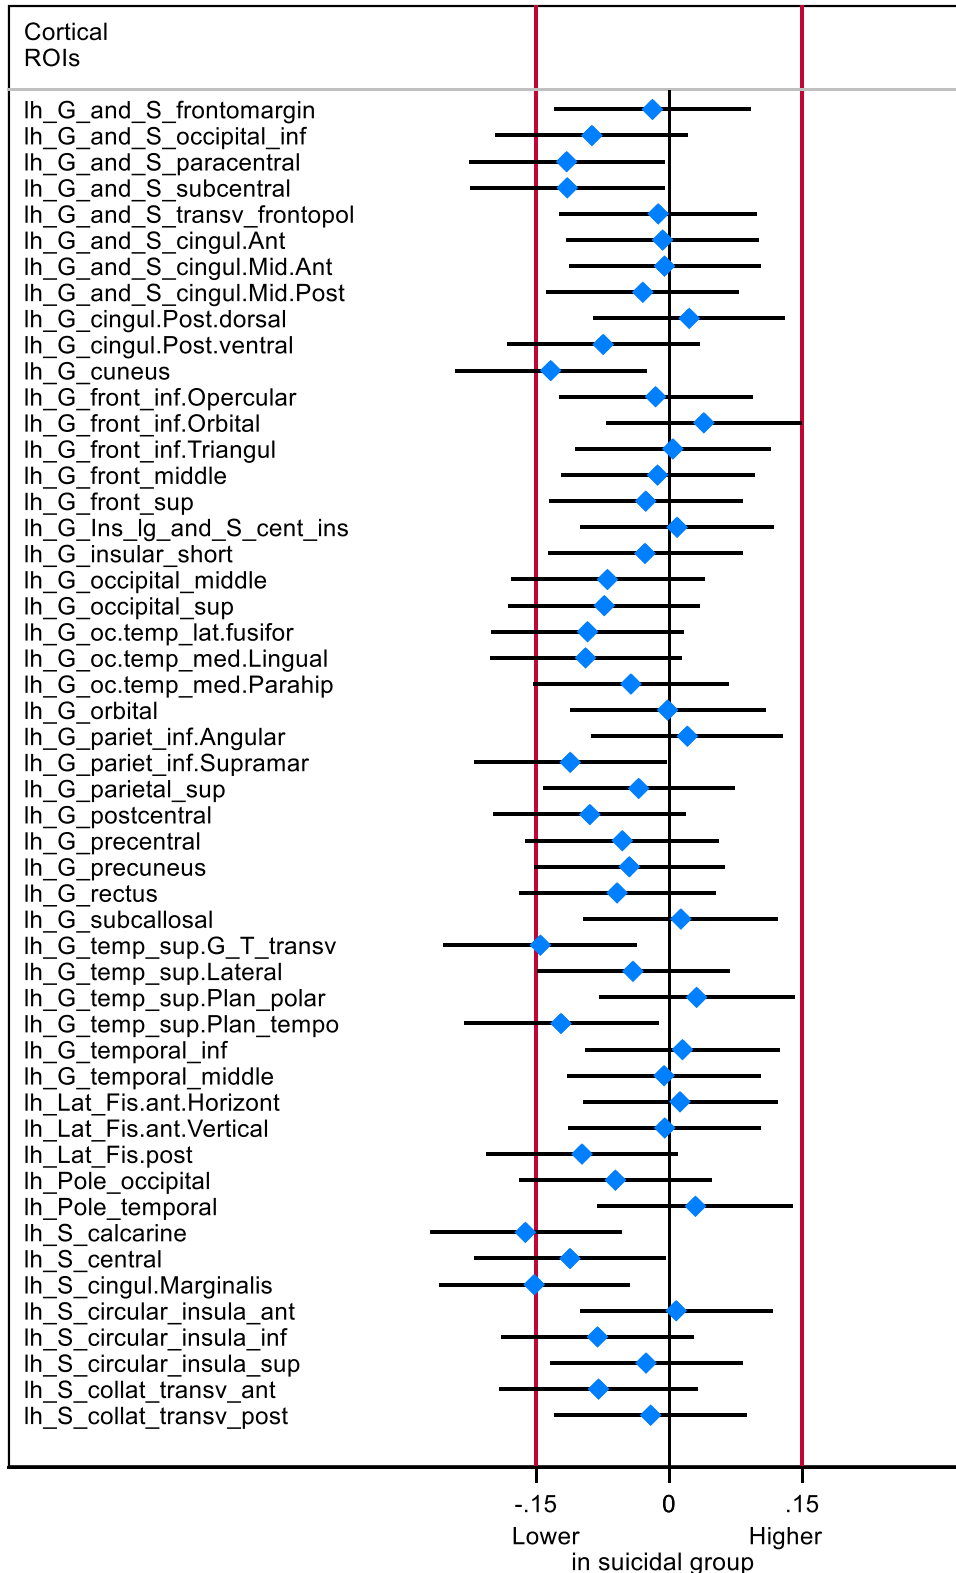

**eFigure 13 (1 of 3).** Results of the Equivalence test for differences in functional activity in cortical regions between the never-suicidal group and the child-reported suicidality group for anticipation of reward. The figure shows the effect sizes and 95% confidence intervals of the difference against the interval of equivalence (-0.15 to 0.15).

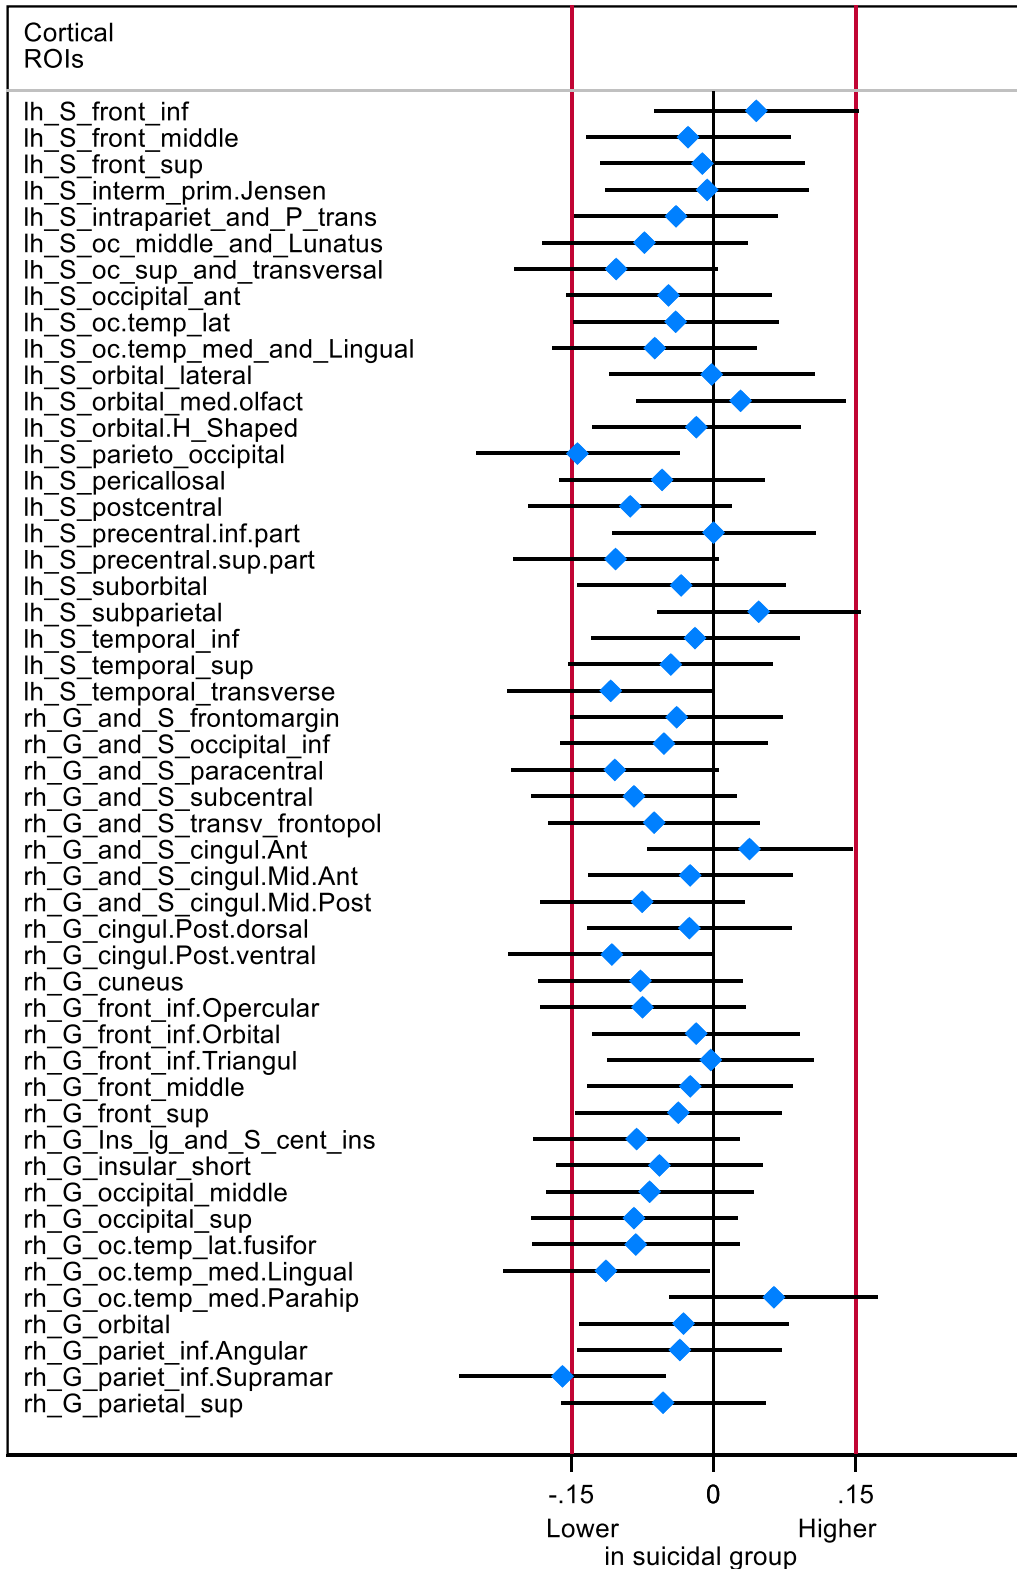

**eFigure 13 (2 of 3).** Results of the Equivalence test for differences in functional activity in cortical regions between the never-suicidal group and the child-reported suicidality group for anticipation of reward. The figure shows the effect sizes and 95% confidence intervals of the difference against the interval of equivalence (-0.15 to 0.15).

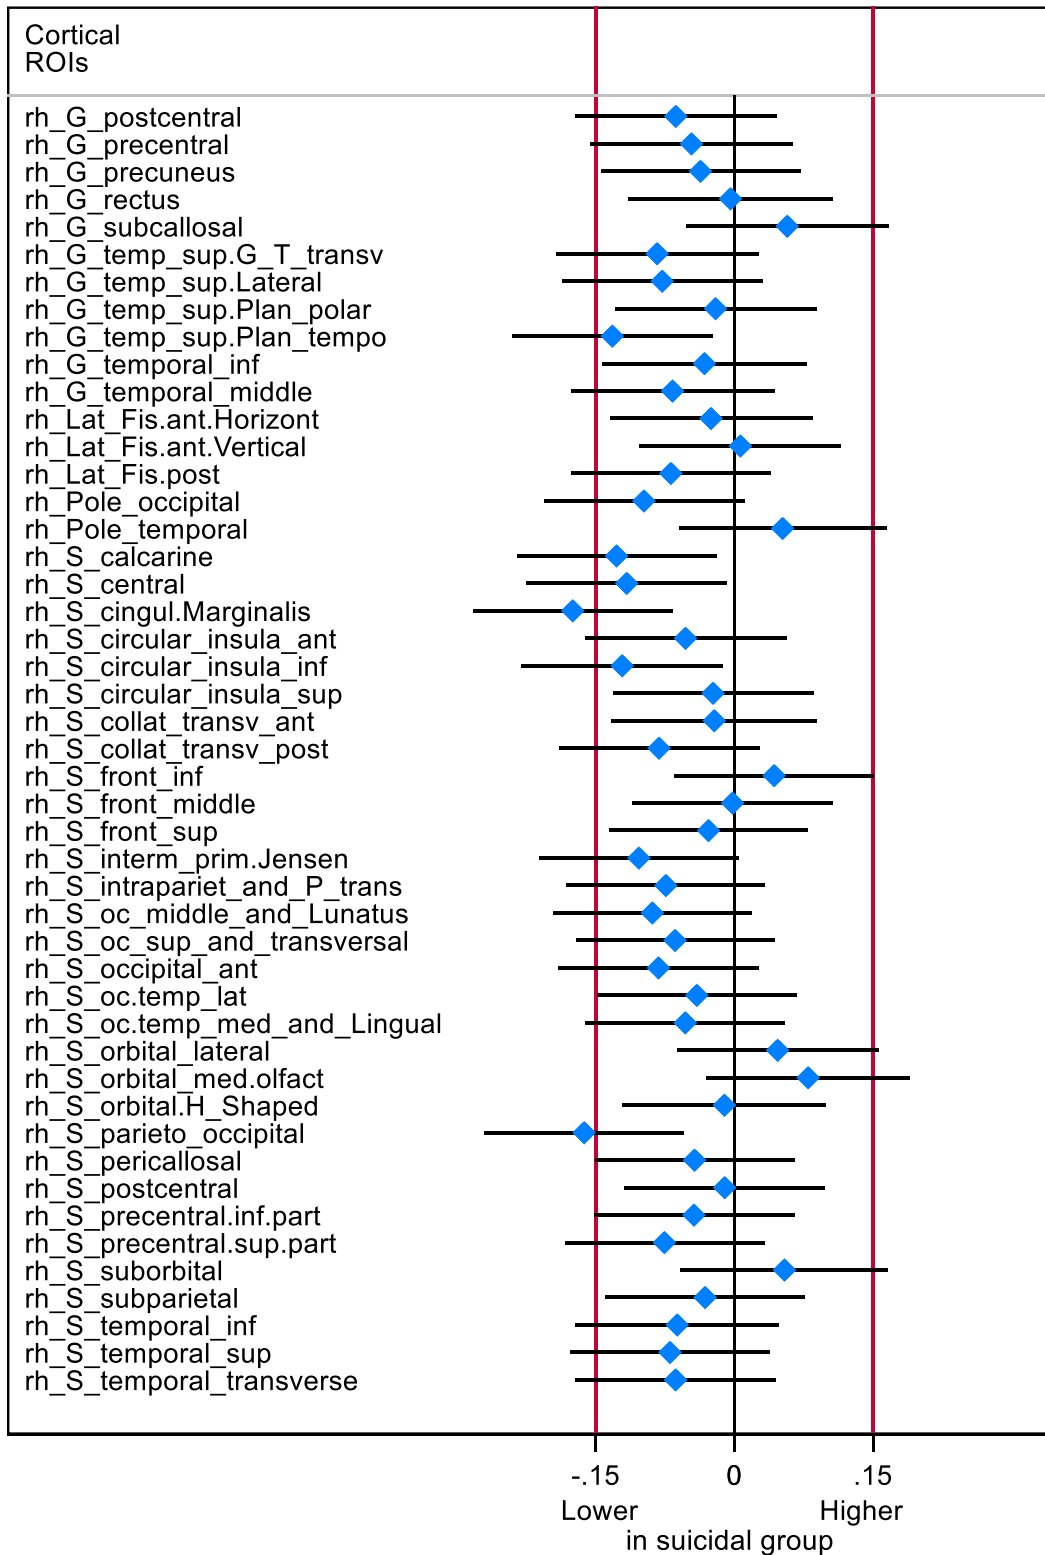

**eFigure 13 (3 of 3).** Results of the Equivalence test for differences in functional activity in cortical regions between the never-suicidal group and the child-reported suicidality group for anticipation of reward. The figure shows the effect sizes and 95% confidence intervals of the difference against the interval of equivalence (-0.15 to 0.15).

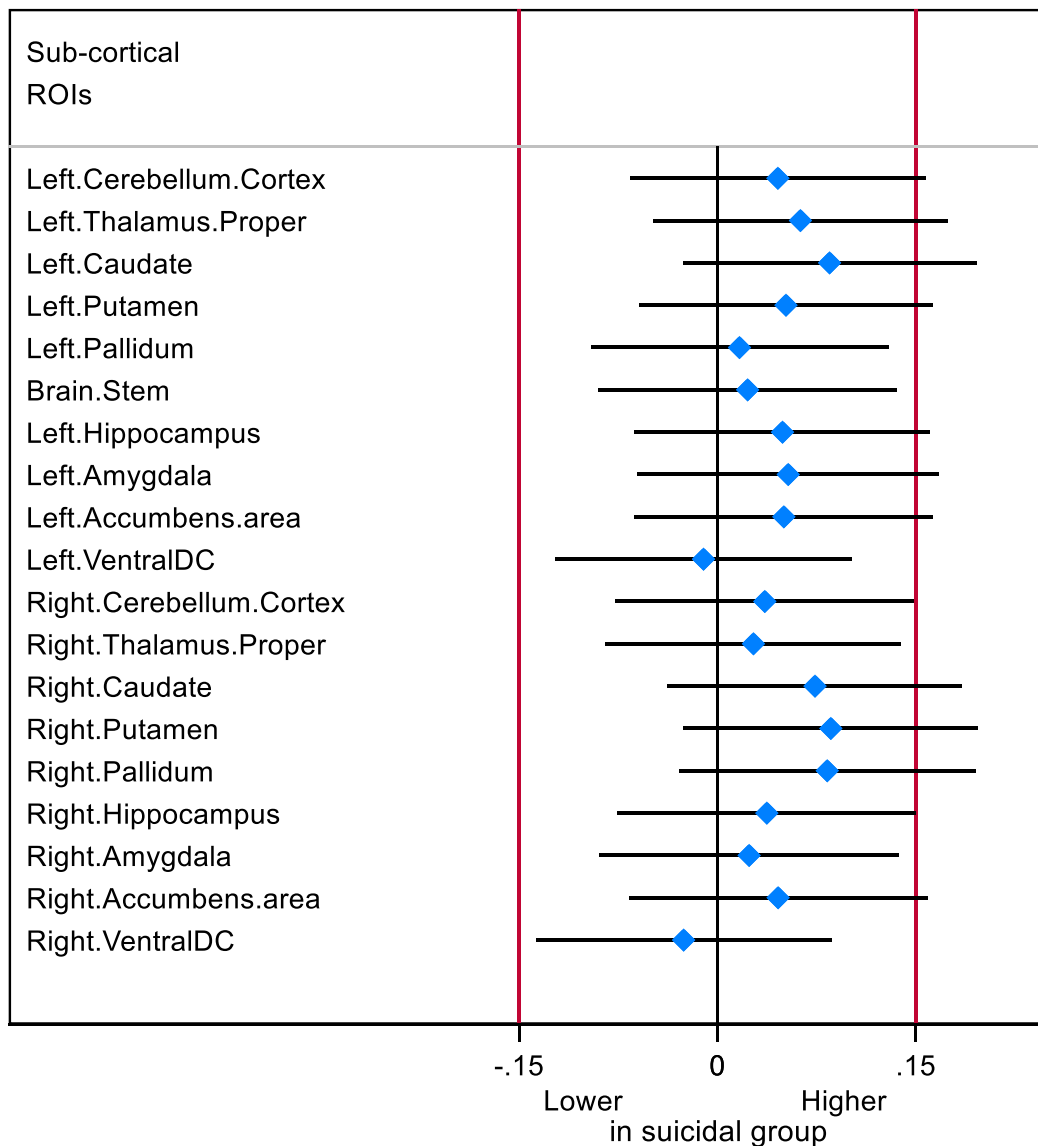

**eFigure 14.** Results of the Equivalence test for differences in functional activity in subcortical regions between the never-suicidal group and the caregiver-reported suicidality group for anticipation of reward. The figure shows the effect sizes and 95% confidence intervals of the difference against the interval of equivalence (-0.15 to 0.15).

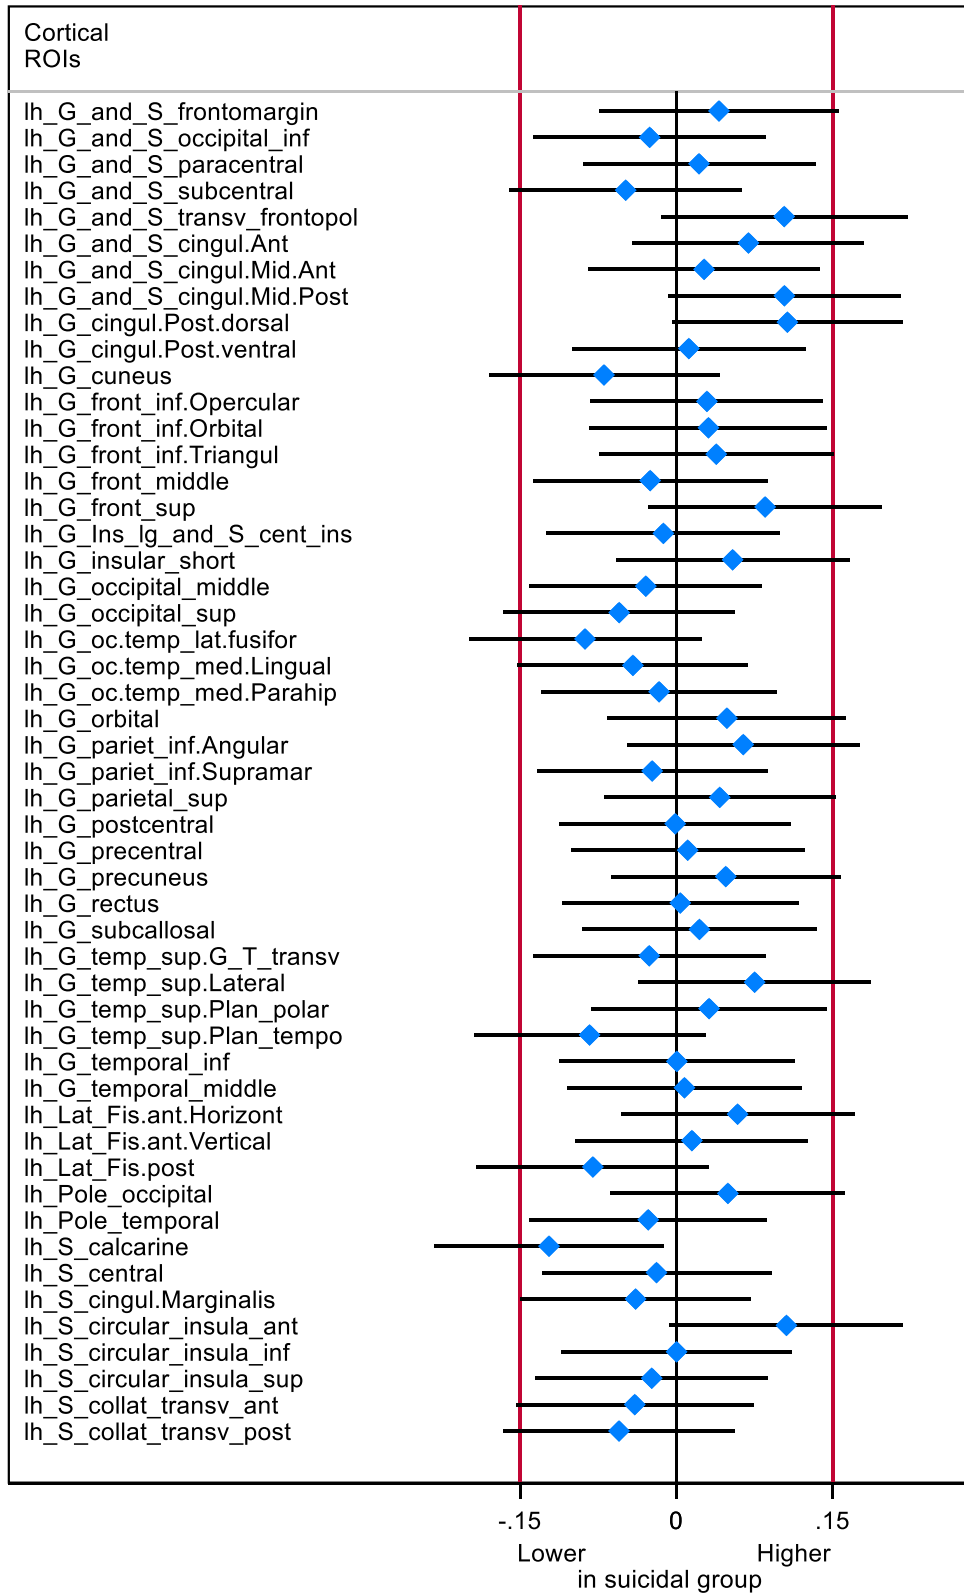

**eFigure 15 (1 of 3).** Results of the Equivalence test for differences in functional activity in cortical regions between the never-suicidal group and the caregiver-reported suicidality group for anticipation of reward. The figure shows the effect sizes and 95% confidence intervals of the difference against the interval of equivalence (-0.15 to 0.15).

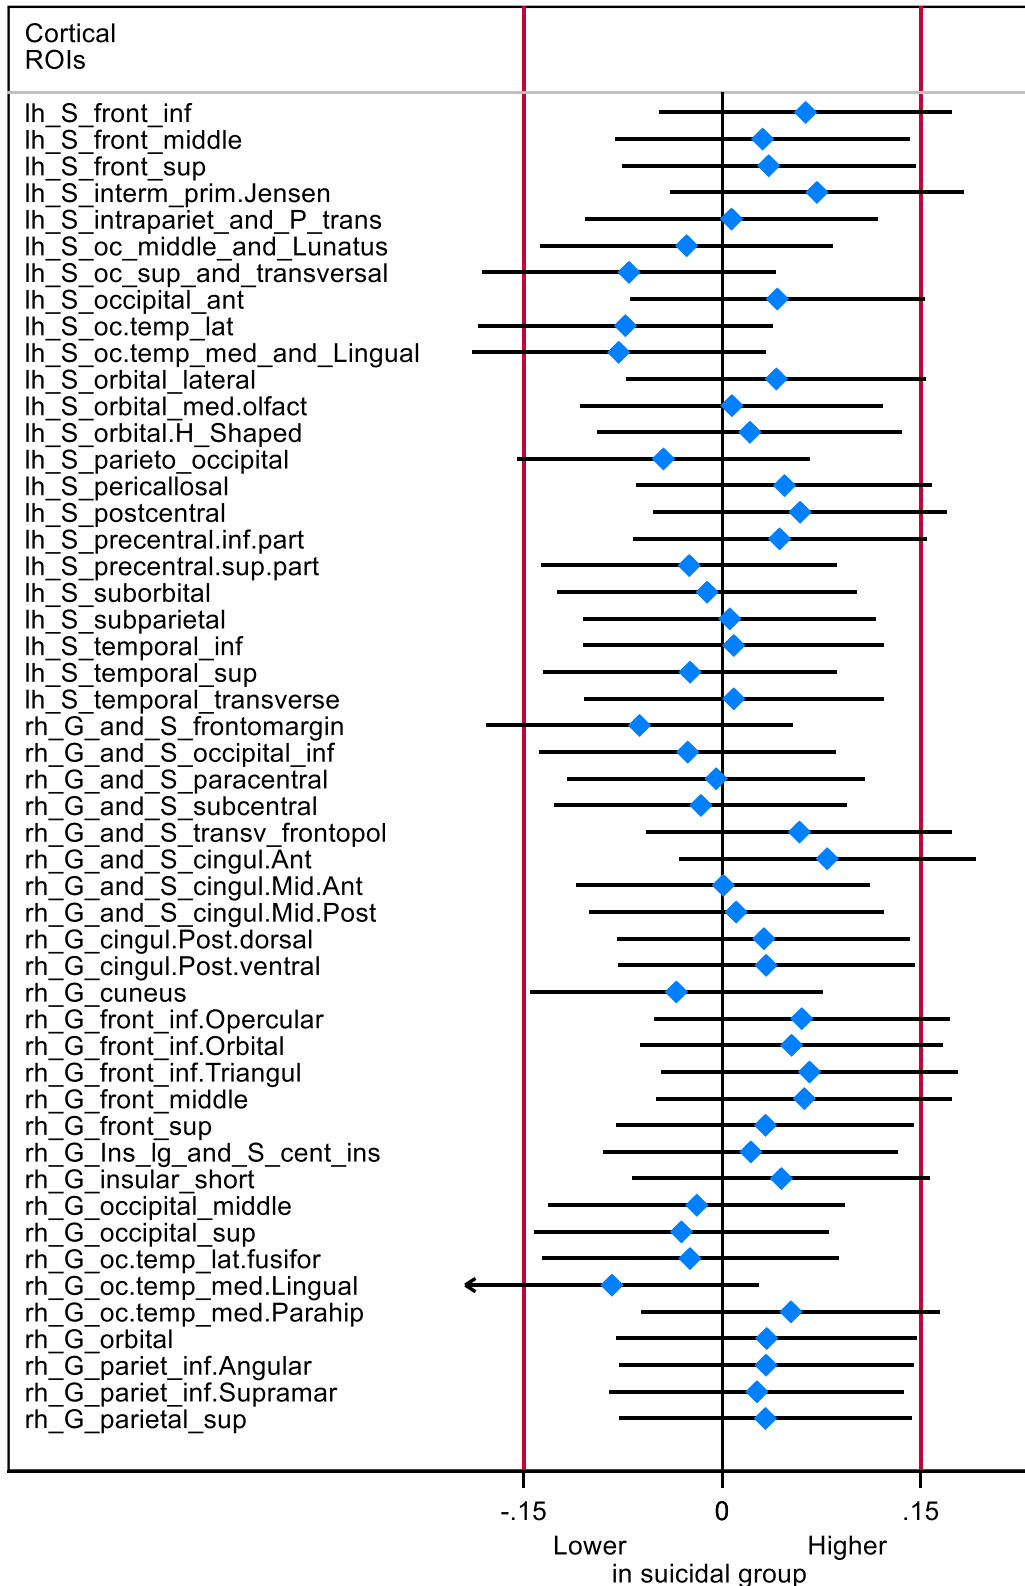

**eFigure 15 (2 of 3).** Results of the Equivalence test for differences in functional activity in cortical regions between the never-suicidal group and the caregiver-reported suicidality group for anticipation of reward. The figure shows the effect sizes and 95% confidence intervals of the difference against the interval of equivalence (-0.15 to 0.15).

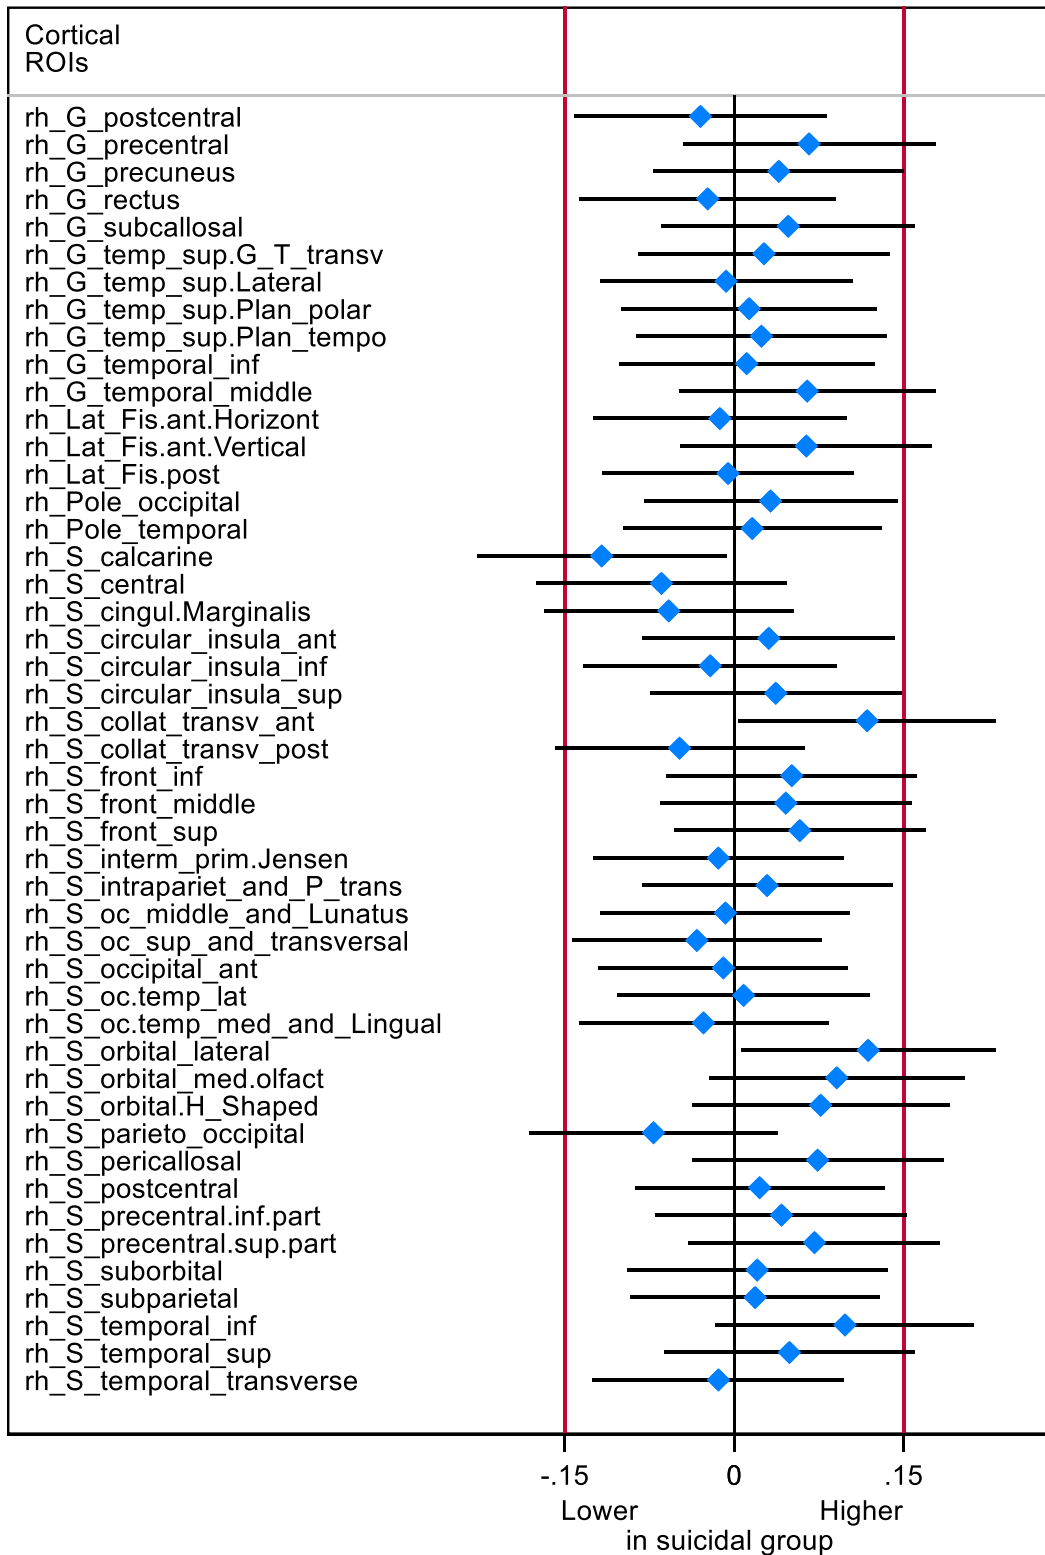

**eFigure 15 (3 of 3).** Results of the Equivalence test for differences in functional activity in cortical regions between the never-suicidal group and the caregiver-reported suicidality group for anticipation of reward. The figure shows the effect sizes and 95% confidence intervals of the difference against the interval of equivalence (-0.15 to 0.15).

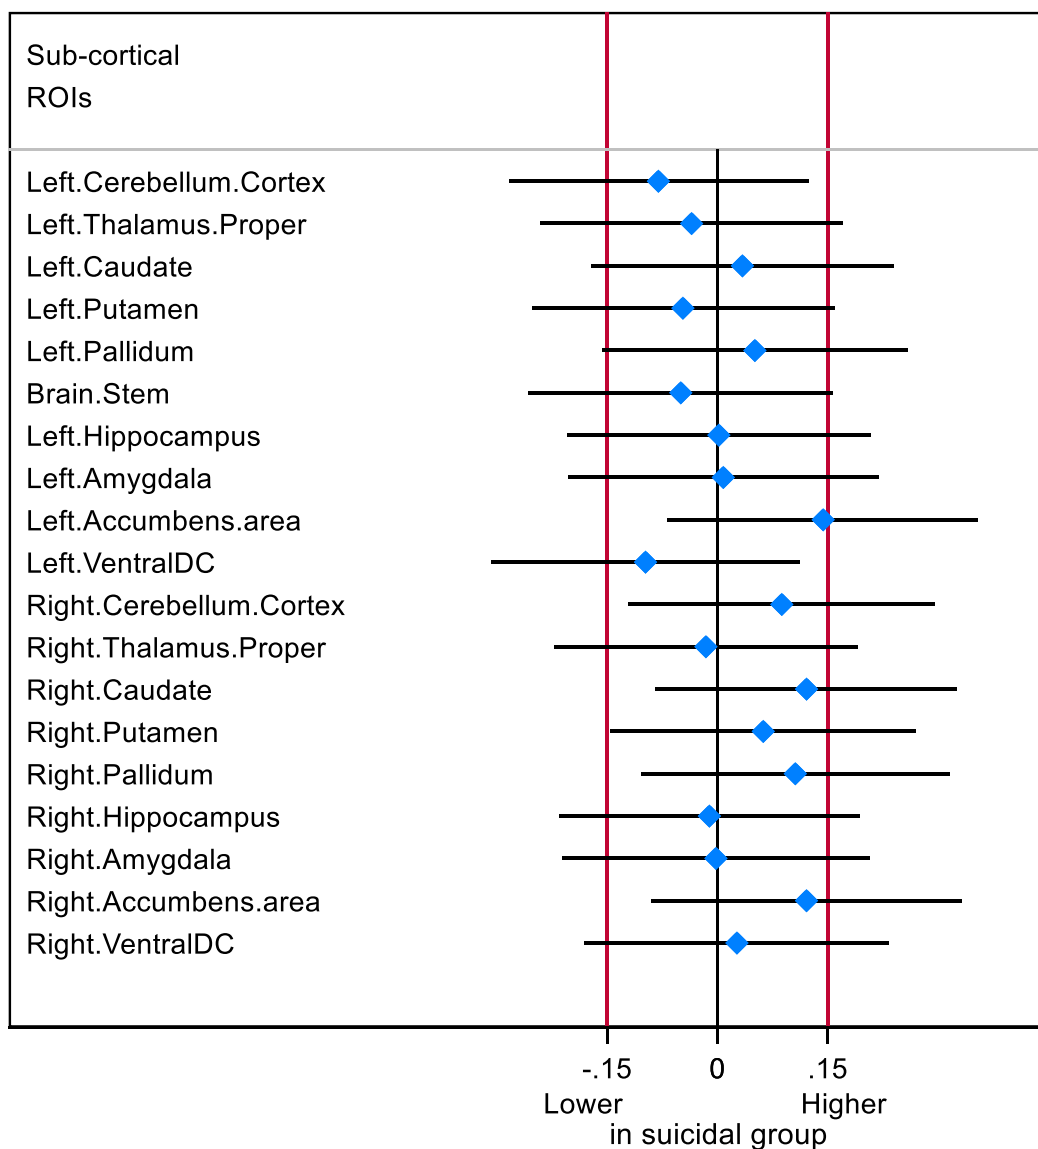

**eFigure 16.** Results of the Equivalence test for differences in functional activity in subcortical regions between the never-suicidal group and the concordantly-reported suicidality group for anticipation of reward. The figure shows the effect sizes and 95% confidence intervals of the difference against the interval of equivalence (-0.15 to 0.15).



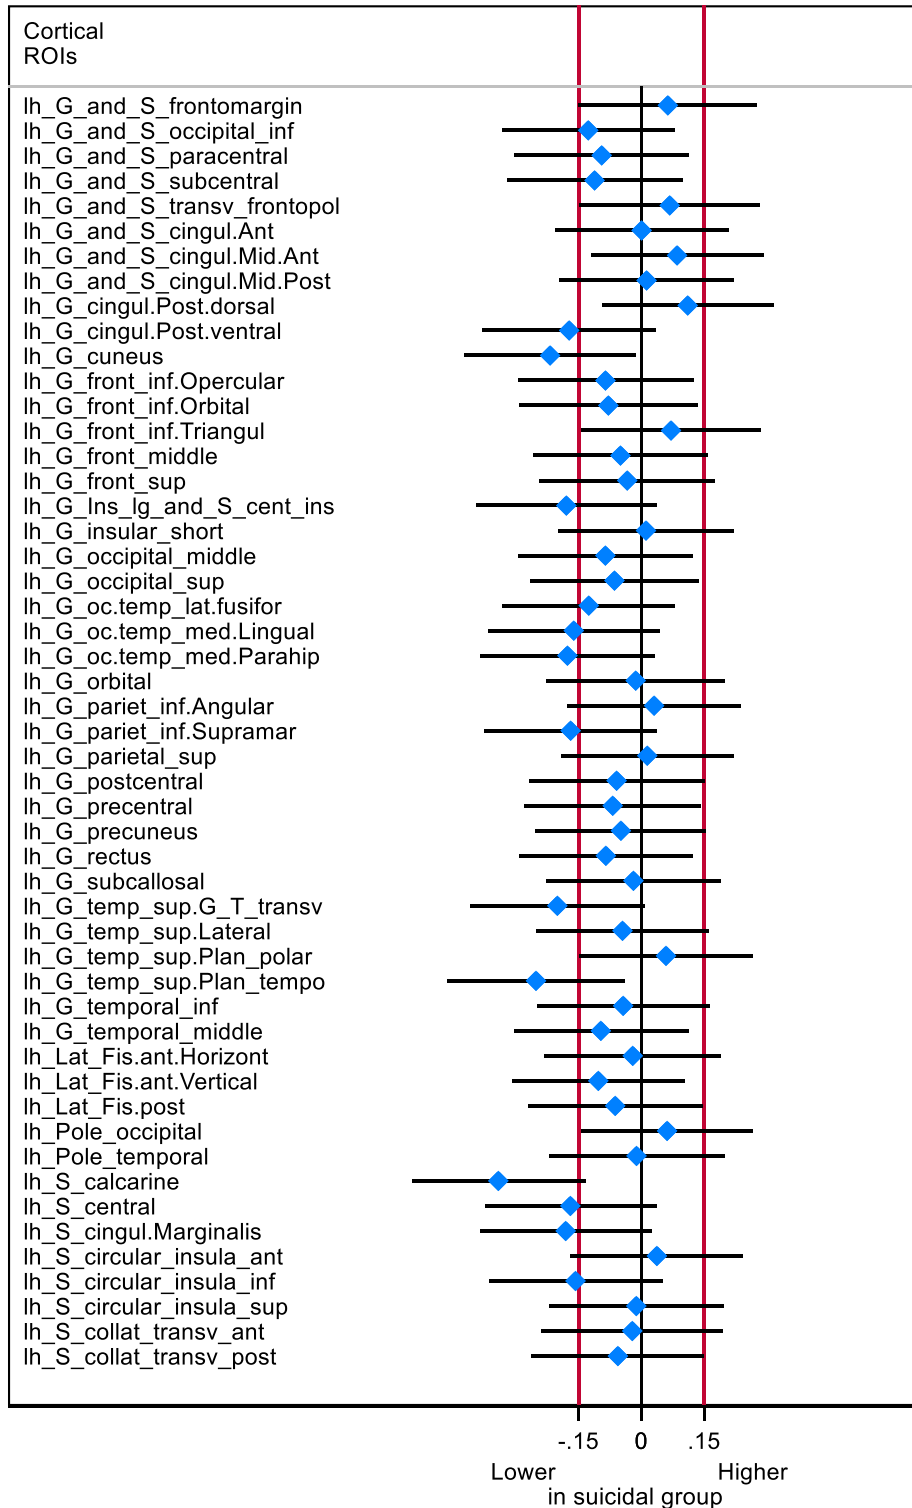

**eFigure 17 (1 of 3).** Results of the Equivalence test for differences in functional activity in cortical regions between the never-suicidal group and the concordantly-reported suicidality group for anticipation of reward. The figure shows the effect sizes and 95% confidence intervals of the difference against the interval of equivalence (-0.15 to 0.15).

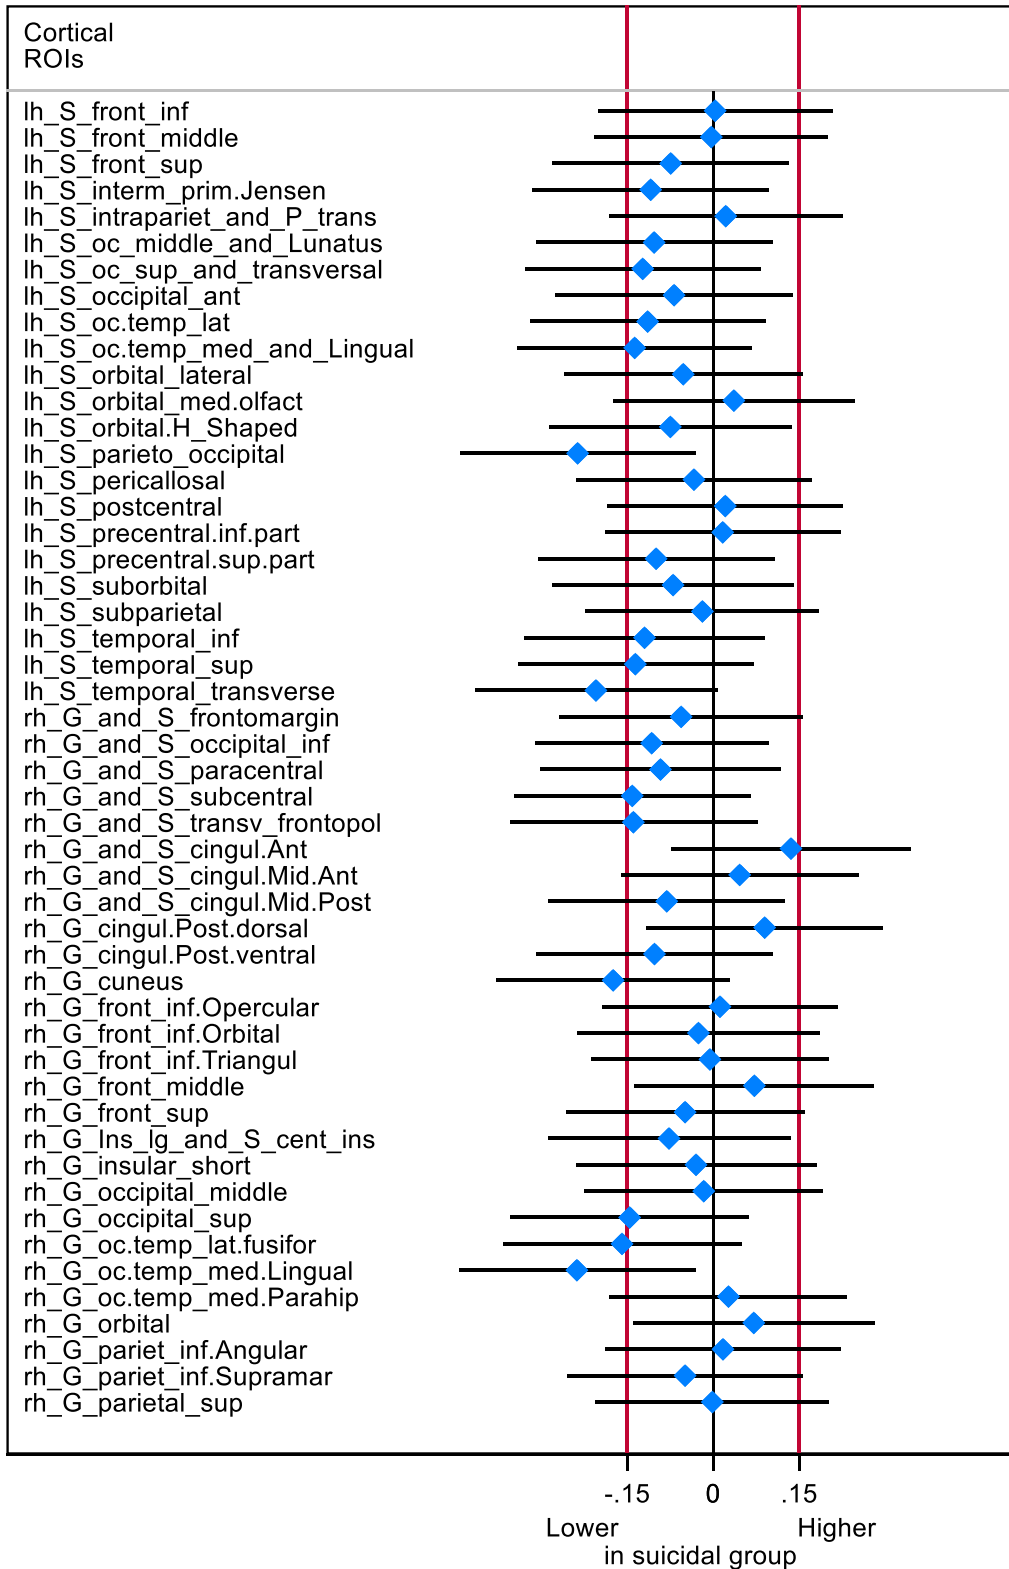

**eFigure 17 (2 of 3).** Results of the Equivalence test for differences in functional activity in cortical regions between the never-suicidal group and the concordantly-reported suicidality group for anticipation of reward. The figure shows the effect sizes and 95% confidence intervals of the difference against the interval of equivalence (-0.15 to 0.15).

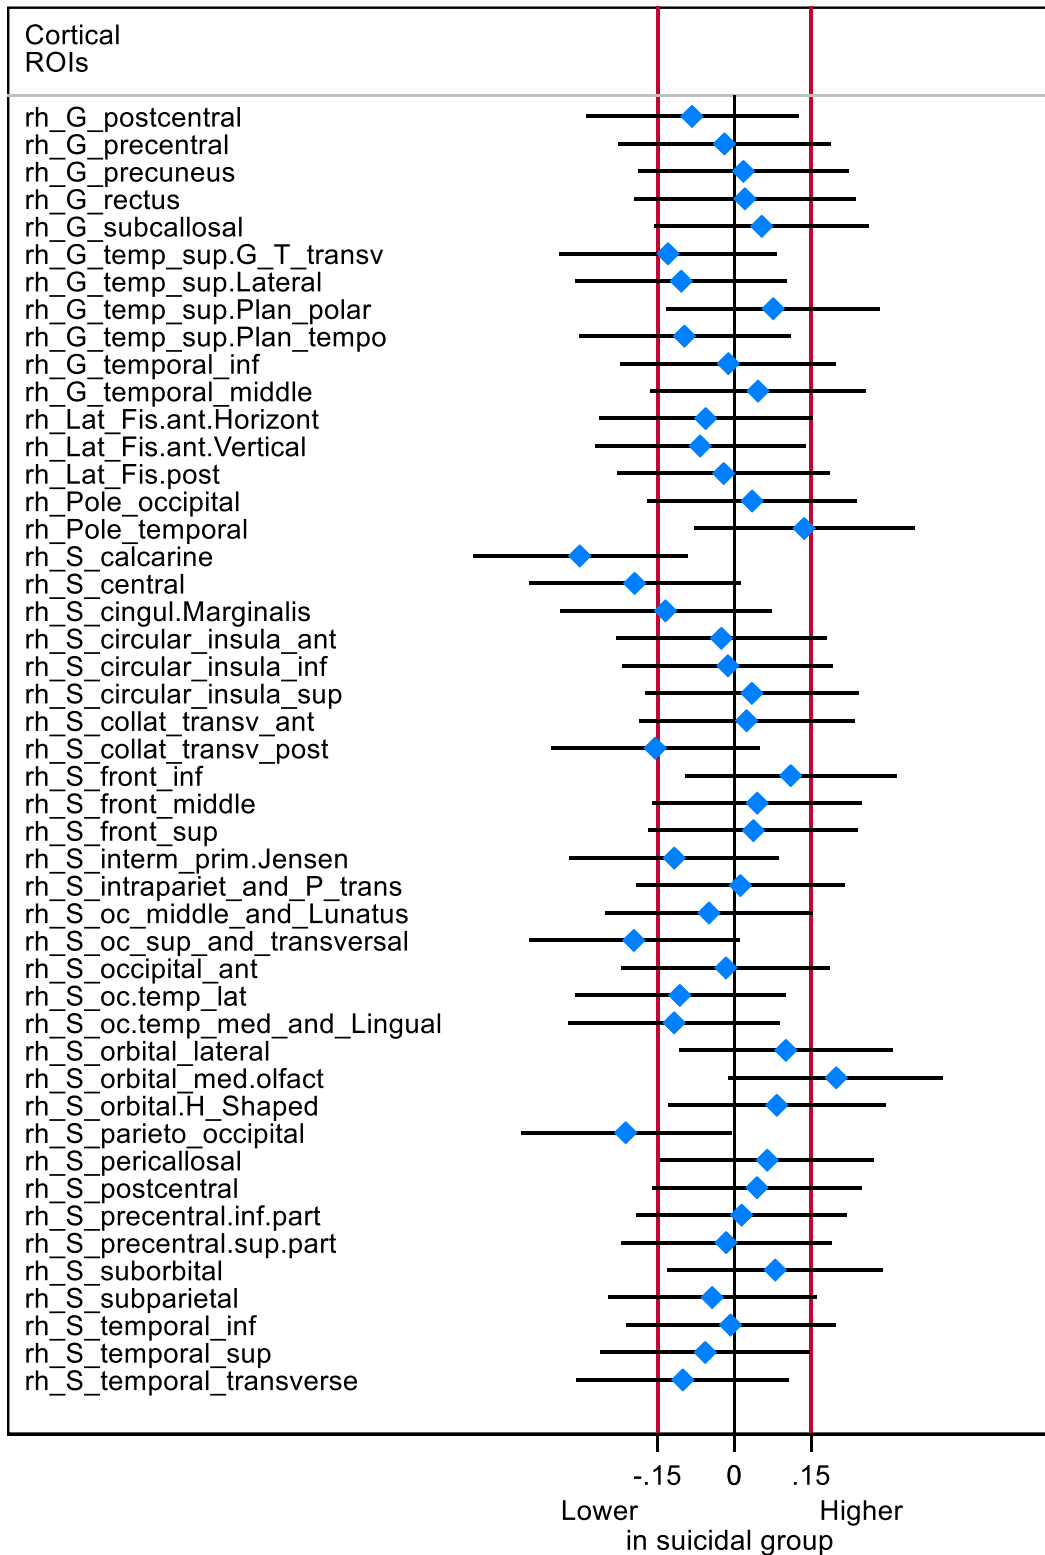

**eFigure 17 (3 of 3).** Results of the Equivalence test for differences in functional activity in cortical regions between the never-suicidal group and the concordantly-reported suicidality group for anticipation of reward. The figure shows the effect sizes and 95% confidence intervals of the difference against the interval of equivalence (-0.15 to 0.15).

### Anticipation of large loss vs neutral

| <b>eTable 14. Differences in functional activity between the never-suicidal group and the child-reported suicidality group for anticipation of loss: Welch's t-test</b> |             |               |          |                |              |
|-------------------------------------------------------------------------------------------------------------------------------------------------------------------------|-------------|---------------|----------|----------------|--------------|
| <b>ROIs</b>                                                                                                                                                             | <b>Mean</b> | <b>95%CI</b>  | <b>t</b> | <b>p (unc)</b> | <b>p FDR</b> |
| <b>Subcortical regions</b>                                                                                                                                              |             |               |          |                |              |
| Left.Cerebellum.Cortex                                                                                                                                                  | -0.016      | -0.044, 0.013 | -1.09    | 0.278          | 0.979        |
| Left.Thalamus.Proper                                                                                                                                                    | -0.001      | -0.017, 0.014 | -0.14    | 0.888          | 0.979        |
| Left.Caudate                                                                                                                                                            | 0.009       | -0.013, 0.032 | 0.83     | 0.408          | 0.979        |
| Left.Putamen                                                                                                                                                            | 0.001       | -0.016, 0.019 | 0.17     | 0.864          | 0.979        |
| Left.Pallidum                                                                                                                                                           | 0.008       | -0.01, 0.025  | 0.87     | 0.387          | 0.979        |
| Brain.Stem                                                                                                                                                              | 0.005       | -0.014, 0.023 | 0.50     | 0.615          | 0.979        |
| Left.Hippocampus                                                                                                                                                        | 0.005       | -0.011, 0.022 | 0.66     | 0.509          | 0.979        |
| Left.Amygdala                                                                                                                                                           | 0.014       | -0.006, 0.035 | 1.37     | 0.172          | 0.979        |
| Left.Accumbens.area                                                                                                                                                     | 0.021       | -0.005, 0.047 | 1.55     | 0.121          | 0.979        |
| Left.VentralDC                                                                                                                                                          | 0.004       | -0.015, 0.023 | 0.43     | 0.665          | 0.979        |
| Right.Cerebellum.Cortex                                                                                                                                                 | 0.008       | -0.02, 0.035  | 0.57     | 0.569          | 0.979        |
| Right.Thalamus.Proper                                                                                                                                                   | -0.001      | -0.018, 0.015 | -0.16    | 0.869          | 0.979        |
| Right.Caudate                                                                                                                                                           | 0.003       | -0.021, 0.027 | 0.24     | 0.808          | 0.979        |
| Right.Putamen                                                                                                                                                           | 0.005       | -0.013, 0.024 | 0.58     | 0.562          | 0.979        |
| Right.Pallidum                                                                                                                                                          | 0.009       | -0.008, 0.026 | 1.00     | 0.316          | 0.979        |
| Right.Hippocampus                                                                                                                                                       | 0.008       | -0.008, 0.024 | 0.95     | 0.341          | 0.979        |
| Right.Amygdala                                                                                                                                                          | 0.008       | -0.014, 0.03  | 0.73     | 0.466          | 0.979        |
| Right.Accumbens.area                                                                                                                                                    | 0.016       | -0.009, 0.042 | 1.24     | 0.214          | 0.979        |
| Right.VentralDC                                                                                                                                                         | 0.002       | -0.018, 0.023 | 0.21     | 0.831          | 0.979        |
| <b>Cortical regions</b>                                                                                                                                                 |             |               |          |                |              |
| lh_G_and_S_frontomargin                                                                                                                                                 | -0.018      | -0.051, 0.014 | -1.10    | 0.271          | 0.979        |
| lh_G_and_S_occipital_inf                                                                                                                                                | -0.006      | -0.026, 0.014 | -0.56    | 0.573          | 0.979        |
| lh_G_and_S_paracentral                                                                                                                                                  | -0.016      | -0.037, 0.004 | -1.56    | 0.120          | 0.979        |
| lh_G_and_S_subcentral                                                                                                                                                   | 0.012       | -0.024, 0.048 | 0.65     | 0.518          | 0.979        |
| lh_G_and_S_transv_frontopol                                                                                                                                             | 0.004       | -0.017, 0.025 | 0.39     | 0.693          | 0.979        |
| lh_G_and_S_cingul.Ant                                                                                                                                                   | 0.003       | -0.015, 0.021 | 0.31     | 0.755          | 0.979        |
| lh_G_and_S_cingul.Mid.Ant                                                                                                                                               | -0.001      | -0.017, 0.016 | -0.10    | 0.918          | 0.979        |
| lh_G_and_S_cingul.Mid.Post                                                                                                                                              | 0.003       | -0.016, 0.022 | 0.33     | 0.740          | 0.979        |
| lh_G_cingul.Post.dorsal                                                                                                                                                 | -0.005      | -0.044, 0.035 | -0.24    | 0.811          | 0.979        |
| lh_G_cingul.Post.ventral                                                                                                                                                | -0.027      | -0.059, 0.004 | -1.70    | 0.091          | 0.979        |
| lh_G_cuneus                                                                                                                                                             | -0.008      | -0.027, 0.011 | -0.86    | 0.391          | 0.979        |
| lh_G_front_inf.Opercular                                                                                                                                                | 0.032       | 0.002, 0.062  | 2.10     | <b>0.036</b>   | 0.979        |
| lh_G_front_inf.Orbital                                                                                                                                                  | 0.009       | -0.016, 0.034 | 0.74     | 0.460          | 0.979        |
| lh_G_front_inf.Triangul                                                                                                                                                 | -0.004      | -0.023, 0.016 | -0.38    | 0.705          | 0.979        |
| lh_G_front_middle                                                                                                                                                       | -0.001      | -0.015, 0.013 | -0.10    | 0.920          | 0.979        |
| lh_G_front_sup                                                                                                                                                          | -0.011      | -0.03, 0.009  | -1.08    | 0.281          | 0.979        |
| lh_G_Ins_lg_and_S_cent_ins                                                                                                                                              | -0.003      | -0.02, 0.014  | -0.36    | 0.716          | 0.979        |
| lh_G_insular_short                                                                                                                                                      | -0.004      | -0.024, 0.017 | -0.35    | 0.724          | 0.979        |

**eTable 14. Differences in functional activity between the never-suicidal group and the child-reported suicidality group for anticipation of loss: Welch's t-test**

| ROIs                         | Mean   | 95%CI         | t     | p (unc)      | p FDR |
|------------------------------|--------|---------------|-------|--------------|-------|
| lh_G_occipital_middle        | -0.001 | -0.025, 0.023 | -0.11 | 0.913        | 0.979 |
| lh_G_occipital_sup           | -0.008 | -0.033, 0.017 | -0.62 | 0.539        | 0.979 |
| lh_G_oc.temp_lat.fusifor     | -0.015 | -0.05, 0.019  | -0.87 | 0.384        | 0.979 |
| lh_G_oc.temp_med.Lingual     | 0.002  | -0.022, 0.025 | 0.14  | 0.888        | 0.979 |
| lh_G_oc.temp_med.Parahip     | 0.018  | -0.016, 0.052 | 1.03  | 0.304        | 0.979 |
| lh_G_orbital                 | 0.002  | -0.017, 0.021 | 0.18  | 0.860        | 0.979 |
| lh_G_pariet_inf.Angular      | -0.010 | -0.027, 0.006 | -1.25 | 0.213        | 0.979 |
| lh_G_pariet_inf.Supramar     | -0.008 | -0.026, 0.01  | -0.90 | 0.368        | 0.979 |
| lh_G_parietal_sup            | -0.008 | -0.028, 0.011 | -0.84 | 0.403        | 0.979 |
| lh_G_postcentral             | -0.008 | -0.024, 0.007 | -1.09 | 0.277        | 0.979 |
| lh_G_precentral              | -0.012 | -0.03, 0.006  | -1.33 | 0.184        | 0.979 |
| lh_G_precuneus               | 0.025  | -0.041, 0.09  | 0.73  | 0.463        | 0.979 |
| lh_G_rectus                  | 0.016  | -0.017, 0.049 | 0.96  | 0.336        | 0.979 |
| lh_G_subcallosal             | -0.020 | -0.041, 0.001 | -1.87 | 0.062        | 0.979 |
| lh_G_temp_sup.G_T_transv     | -0.005 | -0.022, 0.011 | -0.66 | 0.512        | 0.979 |
| lh_G_temp_sup.Lateral        | 0.008  | -0.009, 0.026 | 0.96  | 0.339        | 0.979 |
| lh_G_temp_sup.Plan_polar     | -0.008 | -0.026, 0.01  | -0.90 | 0.371        | 0.979 |
| lh_G_temp_sup.Plan_tempo     | 0.010  | -0.019, 0.039 | 0.68  | 0.500        | 0.979 |
| lh_G_temporal_inf            | -0.009 | -0.031, 0.012 | -0.86 | 0.389        | 0.979 |
| lh_G_temporal_middle         | 0.022  | -0.003, 0.047 | 1.72  | 0.086        | 0.979 |
| lh_Lat_Fis.ant.Horizontal    | 0.019  | -0.009, 0.046 | 1.33  | 0.183        | 0.979 |
| lh_Lat_Fis.ant.Vertical      | -0.008 | -0.029, 0.013 | -0.74 | 0.462        | 0.979 |
| lh_Lat_Fis.post              | -0.009 | -0.051, 0.033 | -0.43 | 0.669        | 0.979 |
| lh_Pole_occipital            | 0.022  | -0.005, 0.049 | 1.62  | 0.106        | 0.979 |
| lh_Pole_temporal             | -0.039 | -0.07, -0.007 | -2.39 | <b>0.017</b> | 0.979 |
| lh_S_calcarine               | -0.013 | -0.033, 0.008 | -1.21 | 0.226        | 0.979 |
| lh_S_central                 | -0.011 | -0.028, 0.007 | -1.17 | 0.243        | 0.979 |
| lh_S_cingul.Marginalis       | 0.019  | -0.003, 0.04  | 1.71  | 0.087        | 0.979 |
| lh_S_circular_insula_ant     | -0.004 | -0.021, 0.013 | -0.43 | 0.666        | 0.979 |
| lh_S_circular_insula_inf     | -0.004 | -0.023, 0.014 | -0.44 | 0.662        | 0.979 |
| lh_S_circular_insula_sup     | -0.007 | -0.038, 0.024 | -0.44 | 0.662        | 0.979 |
| lh_S_collat_transv_ant       | 0.017  | -0.018, 0.051 | 0.96  | 0.338        | 0.979 |
| lh_S_collat_transv_post      | 0.010  | -0.012, 0.032 | 0.87  | 0.385        | 0.979 |
| lh_S_front_inf               | 0.003  | -0.018, 0.025 | 0.31  | 0.757        | 0.979 |
| lh_S_front_middle            | 0.001  | -0.016, 0.017 | 0.10  | 0.919        | 0.979 |
| lh_S_front_sup               | 0.000  | -0.025, 0.024 | -0.04 | 0.971        | 0.990 |
| lh_S_interm_prim.Jensen      | -0.003 | -0.023, 0.017 | -0.30 | 0.764        | 0.979 |
| lh_S_intrapariet_and_P_trans | -0.017 | -0.047, 0.013 | -1.13 | 0.259        | 0.979 |
| lh_S_oc_middle_and_Lunatus   | -0.003 | -0.026, 0.019 | -0.29 | 0.770        | 0.979 |
| lh_S_oc_sup_and_transversal  | 0.004  | -0.016, 0.025 | 0.42  | 0.675        | 0.979 |
| lh_S_occipital_ant           | -0.007 | -0.026, 0.013 | -0.69 | 0.492        | 0.979 |
| lh_S_oc.temp_lat             | 0.003  | -0.017, 0.022 | 0.27  | 0.788        | 0.979 |
| lh_S_oc.temp_med_and_Lingual | 0.028  | -0.004, 0.061 | 1.70  | 0.090        | 0.979 |

**eTable 14. Differences in functional activity between the never-suicidal group and the child-reported suicidality group for anticipation of loss: Welch's t-test**

| ROIs                        | Mean   | 95%CI         | t     | p (unc)      | p FDR |
|-----------------------------|--------|---------------|-------|--------------|-------|
| lh_S_orbital_lateral        | 0.006  | -0.052, 0.064 | 0.22  | 0.828        | 0.979 |
| lh_S_orbital_med.olfact     | 0.008  | -0.019, 0.034 | 0.55  | 0.580        | 0.979 |
| lh_S_orbital.H_Shaped       | -0.002 | -0.022, 0.018 | -0.20 | 0.840        | 0.979 |
| lh_S_parieto_occipital      | 0.005  | -0.018, 0.028 | 0.44  | 0.658        | 0.979 |
| lh_S_pericallosal           | 0.002  | -0.015, 0.019 | 0.21  | 0.834        | 0.979 |
| lh_S_postcentral            | 0.002  | -0.02, 0.023  | 0.14  | 0.886        | 0.979 |
| lh_S_precentral.inf.part    | -0.007 | -0.024, 0.01  | -0.82 | 0.413        | 0.979 |
| lh_S_precentral.sup.part    | 0.047  | 0, 0.094      | 1.99  | <b>0.048</b> | 0.979 |
| lh_S_suborbital             | 0.008  | -0.015, 0.03  | 0.66  | 0.512        | 0.979 |
| lh_S_subparietal            | -0.004 | -0.035, 0.028 | -0.23 | 0.815        | 0.979 |
| lh_S_temporal_inf           | 0.001  | -0.015, 0.018 | 0.13  | 0.899        | 0.979 |
| lh_S_temporal_sup           | -0.021 | -0.047, 0.005 | -1.62 | 0.106        | 0.979 |
| lh_S_temporal_transverse    | 0.017  | -0.023, 0.057 | 0.83  | 0.408        | 0.979 |
| rh_G_and_S_frontomargin     | 0.001  | -0.031, 0.033 | 0.06  | 0.951        | 0.990 |
| rh_G_and_S_occipital_inf    | -0.015 | -0.036, 0.006 | -1.40 | 0.163        | 0.979 |
| rh_G_and_S_paracentral      | -0.019 | -0.04, 0.001  | -1.84 | 0.066        | 0.979 |
| rh_G_and_S_subcentral       | -0.002 | -0.036, 0.031 | -0.14 | 0.885        | 0.979 |
| rh_G_and_S_transv_frontopol | 0.016  | -0.005, 0.037 | 1.46  | 0.146        | 0.979 |
| rh_G_and_S_cingul.Ant       | -0.008 | -0.026, 0.009 | -0.93 | 0.350        | 0.979 |
| rh_G_and_S_cingul.Mid.Ant   | -0.005 | -0.021, 0.011 | -0.62 | 0.533        | 0.979 |
| rh_G_and_S_cingul.Mid.Post  | 0.002  | -0.017, 0.021 | 0.24  | 0.813        | 0.979 |
| rh_G_cingul.Post.dorsal     | -0.009 | -0.041, 0.023 | -0.55 | 0.582        | 0.979 |
| rh_G_cingul.Post.ventral    | -0.019 | -0.05, 0.012  | -1.21 | 0.226        | 0.979 |
| rh_G_cuneus                 | -0.007 | -0.024, 0.011 | -0.73 | 0.469        | 0.979 |
| rh_G_front_inf.Opercular    | -0.012 | -0.04, 0.017  | -0.81 | 0.419        | 0.979 |
| rh_G_front_inf.Orbital      | 0.002  | -0.02, 0.024  | 0.18  | 0.861        | 0.979 |
| rh_G_front_inf.Triangul     | 0.002  | -0.019, 0.022 | 0.15  | 0.882        | 0.979 |
| rh_G_front_middle           | -0.005 | -0.019, 0.009 | -0.70 | 0.481        | 0.979 |
| rh_G_front_sup              | 0.006  | -0.015, 0.028 | 0.59  | 0.555        | 0.979 |
| rh_G_Ins_lg_and_S_cent_ins  | -0.005 | -0.022, 0.013 | -0.55 | 0.583        | 0.979 |
| rh_G_insular_short          | -0.006 | -0.027, 0.015 | -0.52 | 0.602        | 0.979 |
| rh_G_occipital_middle       | -0.004 | -0.027, 0.019 | -0.38 | 0.706        | 0.979 |
| rh_G_occipital_sup          | -0.010 | -0.038, 0.017 | -0.74 | 0.461        | 0.979 |
| rh_G_oc.temp_lat.fusifor    | -0.011 | -0.046, 0.023 | -0.64 | 0.524        | 0.979 |
| rh_G_oc.temp_med.Lingual    | 0.004  | -0.023, 0.03  | 0.28  | 0.780        | 0.979 |
| rh_G_oc.temp_med.Parahip    | 0.001  | -0.034, 0.035 | 0.03  | 0.977        | 0.990 |
| rh_G_orbital                | 0.004  | -0.015, 0.023 | 0.41  | 0.684        | 0.979 |
| rh_G_pariet_inf.Angular     | -0.015 | -0.032, 0.002 | -1.79 | 0.075        | 0.979 |
| rh_G_pariet_inf.Supramar    | -0.008 | -0.026, 0.01  | -0.84 | 0.400        | 0.979 |
| rh_G_parietal_sup           | -0.012 | -0.032, 0.007 | -1.26 | 0.208        | 0.979 |
| rh_G_postcentral            | -0.003 | -0.018, 0.011 | -0.42 | 0.674        | 0.979 |
| rh_G_precentral             | 0.000  | -0.019, 0.018 | -0.05 | 0.961        | 0.990 |
| rh_G_precuneus              | -0.005 | -0.082, 0.073 | -0.12 | 0.904        | 0.979 |

**eTable 14. Differences in functional activity between the never-suicidal group and the child-reported suicidality group for anticipation of loss: Welch's t-test**

| ROIs                         | Mean   | 95%CI         | t     | p (unc) | p FDR |
|------------------------------|--------|---------------|-------|---------|-------|
| rh_G_rectus                  | -0.006 | -0.039, 0.027 | -0.34 | 0.734   | 0.979 |
| rh_G_subcallosal             | 0.005  | -0.018, 0.027 | 0.39  | 0.696   | 0.979 |
| rh_G_temp_sup.G_T_transv     | -0.004 | -0.02, 0.012  | -0.50 | 0.617   | 0.979 |
| rh_G_temp_sup.Lateral        | 0.009  | -0.007, 0.026 | 1.12  | 0.265   | 0.979 |
| rh_G_temp_sup.Plan_polar     | -0.015 | -0.034, 0.004 | -1.51 | 0.132   | 0.979 |
| rh_G_temp_sup.Plan_tempo     | 0.010  | -0.023, 0.043 | 0.59  | 0.555   | 0.979 |
| rh_G_temporal_inf            | -0.001 | -0.021, 0.019 | -0.10 | 0.918   | 0.979 |
| rh_G_temporal_middle         | -0.004 | -0.028, 0.021 | -0.29 | 0.771   | 0.979 |
| rh_Lat_Fis.ant.Horizontal    | 0.011  | -0.018, 0.04  | 0.74  | 0.460   | 0.979 |
| rh_Lat_Fis.ant.Vertical      | -0.002 | -0.023, 0.019 | -0.18 | 0.860   | 0.979 |
| rh_Lat_Fis.post              | -0.011 | -0.051, 0.029 | -0.53 | 0.595   | 0.979 |
| rh_Pole_occipital            | 0.010  | -0.024, 0.043 | 0.58  | 0.563   | 0.979 |
| rh_Pole_temporal             | -0.032 | -0.065, 0     | -1.97 | 0.050   | 0.979 |
| rh_S_calcarine               | -0.006 | -0.028, 0.016 | -0.52 | 0.600   | 0.979 |
| rh_S_central                 | -0.012 | -0.03, 0.005  | -1.37 | 0.173   | 0.979 |
| rh_S_cingul.Marginalis       | -0.004 | -0.024, 0.016 | -0.38 | 0.701   | 0.979 |
| rh_S_circular_insula_ant     | -0.003 | -0.021, 0.015 | -0.34 | 0.734   | 0.979 |
| rh_S_circular_insula_inf     | 0.011  | -0.009, 0.03  | 1.10  | 0.272   | 0.979 |
| rh_S_circular_insula_sup     | 0.001  | -0.031, 0.033 | 0.07  | 0.943   | 0.990 |
| rh_S_collat_transv_ant       | -0.011 | -0.044, 0.022 | -0.63 | 0.527   | 0.979 |
| rh_S_collat_transv_post      | 0.000  | -0.022, 0.022 | 0.02  | 0.987   | 0.993 |
| rh_S_front_inf               | -0.007 | -0.03, 0.017  | -0.56 | 0.574   | 0.979 |
| rh_S_front_middle            | -0.003 | -0.019, 0.014 | -0.31 | 0.760   | 0.979 |
| rh_S_front_sup               | 0.000  | -0.022, 0.022 | 0.00  | 0.999   | 0.999 |
| rh_S_interm_prim.Jensen      | -0.001 | -0.02, 0.019  | -0.08 | 0.938   | 0.990 |
| rh_S_intrapariet_and_P_trans | -0.016 | -0.044, 0.013 | -1.08 | 0.279   | 0.979 |
| rh_S_oc_middle_and_Lunatus   | -0.008 | -0.031, 0.016 | -0.65 | 0.514   | 0.979 |
| rh_S_oc_sup_and_transversal  | 0.003  | -0.016, 0.022 | 0.32  | 0.748   | 0.979 |
| rh_S_occipital_ant           | 0.006  | -0.015, 0.026 | 0.54  | 0.593   | 0.979 |
| rh_S_oc.temp_lat             | 0.009  | -0.011, 0.03  | 0.91  | 0.364   | 0.979 |
| rh_S_oc.temp_med_and_Lingual | 0.000  | -0.03, 0.031  | 0.03  | 0.978   | 0.990 |
| rh_S_orbital_lateral         | 0.010  | -0.048, 0.068 | 0.33  | 0.745   | 0.979 |
| rh_S_orbital_med.olfact      | -0.011 | -0.036, 0.015 | -0.82 | 0.415   | 0.979 |
| rh_S_orbital.H_Shaped        | -0.002 | -0.023, 0.019 | -0.18 | 0.856   | 0.979 |
| rh_S_parieto_occipital       | -0.005 | -0.03, 0.02   | -0.39 | 0.695   | 0.979 |
| rh_S_pericallosal            | -0.001 | -0.018, 0.016 | -0.14 | 0.888   | 0.979 |
| rh_S_postcentral             | -0.005 | -0.025, 0.015 | -0.47 | 0.640   | 0.979 |
| rh_S_precentral.inf.part     | -0.012 | -0.028, 0.005 | -1.38 | 0.169   | 0.979 |
| rh_S_precentral.sup.part     | 0.039  | -0.023, 0.102 | 1.23  | 0.218   | 0.979 |
| rh_S_suborbital              | 0.004  | -0.017, 0.026 | 0.42  | 0.678   | 0.979 |
| rh_S_subparietal             | -0.005 | -0.038, 0.028 | -0.30 | 0.762   | 0.979 |
| rh_S_temporal_inf            | 0.000  | -0.017, 0.017 | 0.04  | 0.971   | 0.990 |
| rh_S_temporal_sup            | 0.002  | -0.026, 0.03  | 0.16  | 0.877   | 0.979 |

**eTable 14. Differences in functional activity between the never-suicidal group and the child-reported suicidality group for anticipation of loss: Welch's t-test**

| ROIs                     | Mean  | 95%CI         | t    | p (unc) | p FDR |
|--------------------------|-------|---------------|------|---------|-------|
| rh_S_temporal_transverse | 0.013 | -0.024, 0.051 | 0.70 | 0.484   | 0.979 |

**Bold** denotes group differences at  $p < 0.05$  uncorrected

**eTable 15. Differences in functional activity between the never-suicidal group and the caregiver-reported suicidality group for anticipation of loss: Welch's t-test**

| ROIs                        | Mean   | 95%CI          | t     | p (unc)      | p FDR |
|-----------------------------|--------|----------------|-------|--------------|-------|
| <b>Subcortical regions</b>  |        |                |       |              |       |
| Left.Cerebellum.Cortex      | -0.008 | -0.036, 0.02   | -0.55 | 0.582        | 0.987 |
| Left.Thalamus.Proper        | -0.005 | -0.021, 0.011  | -0.65 | 0.514        | 0.987 |
| Left.Caudate                | -0.004 | -0.028, 0.019  | -0.36 | 0.717        | 0.987 |
| Left.Putamen                | -0.002 | -0.02, 0.016   | -0.21 | 0.834        | 0.987 |
| Left.Pallidum               | -0.001 | -0.018, 0.016  | -0.16 | 0.872        | 0.987 |
| Brain.Stem                  | -0.015 | -0.033, 0.003  | -1.61 | 0.108        | 0.845 |
| Left.Hippocampus            | -0.007 | -0.024, 0.01   | -0.79 | 0.429        | 0.987 |
| Left.Amygdala               | 0.006  | -0.015, 0.027  | 0.52  | 0.600        | 0.987 |
| Left.Accumbens.area         | 0.005  | -0.023, 0.032  | 0.34  | 0.733        | 0.987 |
| Left.VentralDC              | -0.015 | -0.035, 0.005  | -1.49 | 0.136        | 0.845 |
| Right.Cerebellum.Cortex     | -0.019 | -0.047, 0.01   | -1.30 | 0.193        | 0.845 |
| Right.Thalamus.Proper       | -0.010 | -0.027, 0.006  | -1.22 | 0.223        | 0.885 |
| Right.Caudate               | -0.004 | -0.029, 0.021  | -0.32 | 0.750        | 0.987 |
| Right.Putamen               | 0.004  | -0.015, 0.022  | 0.39  | 0.700        | 0.987 |
| Right.Pallidum              | 0.012  | -0.005, 0.029  | 1.38  | 0.168        | 0.845 |
| Right.Hippocampus           | 0.003  | -0.013, 0.02   | 0.40  | 0.687        | 0.987 |
| Right.Amygdala              | -0.012 | -0.033, 0.009  | -1.09 | 0.274        | 0.899 |
| Right.Accumbens.area        | 0.003  | -0.023, 0.028  | 0.22  | 0.828        | 0.987 |
| Right.VentralDC             | -0.015 | -0.035, 0.005  | -1.51 | 0.133        | 0.845 |
| <b>Cortical regions</b>     |        |                |       |              |       |
| lh_G_and_S_frontomargin     | -0.042 | -0.073, -0.011 | -2.66 | <b>0.008</b> | 0.478 |
| lh_G_and_S_occipital_inf    | -0.005 | -0.025, 0.015  | -0.49 | 0.621        | 0.987 |
| lh_G_and_S_paracentral      | -0.029 | -0.05, -0.007  | -2.62 | <b>0.009</b> | 0.478 |
| lh_G_and_S_subcentral       | -0.026 | -0.066, 0.014  | -1.27 | 0.206        | 0.860 |
| lh_G_and_S_transv_frontopol | -0.001 | -0.022, 0.02   | -0.12 | 0.903        | 0.987 |
| lh_G_and_S_cingul.Ant       | 0.002  | -0.016, 0.021  | 0.26  | 0.796        | 0.987 |
| lh_G_and_S_cingul.Mid.Ant   | -0.004 | -0.02, 0.013   | -0.43 | 0.668        | 0.987 |
| lh_G_and_S_cingul.Mid.Post  | -0.009 | -0.03, 0.012   | -0.84 | 0.403        | 0.987 |
| lh_G_cingul.Post.dorsal     | -0.029 | -0.069, 0.01   | -1.45 | 0.147        | 0.845 |
| lh_G_cingul.Post.ventral    | -0.026 | -0.059, 0.007  | -1.57 | 0.118        | 0.845 |
| lh_G_cuneus                 | -0.009 | -0.028, 0.011  | -0.87 | 0.387        | 0.987 |
| lh_G_front_inf.Opercular    | 0.012  | -0.018, 0.042  | 0.80  | 0.426        | 0.987 |
| lh_G_front_inf.Orbital      | -0.007 | -0.034, 0.019  | -0.56 | 0.576        | 0.987 |



**eTable 15. Differences in functional activity between the never-suicidal group and the caregiver-reported suicidality group for anticipation of loss: Welch's t-test**

| ROIs                         | Mean   | 95%CI          | t     | p (unc)      | p FDR |
|------------------------------|--------|----------------|-------|--------------|-------|
| lh_G_front_inf.Triangul      | -0.006 | -0.027, 0.015  | -0.56 | 0.576        | 0.987 |
| lh_G_front_middle            | 0.001  | -0.013, 0.016  | 0.19  | 0.846        | 0.987 |
| lh_G_front_sup               | -0.018 | -0.039, 0.002  | -1.77 | 0.078        | 0.845 |
| lh_G_Ins_lg_and_S_cent_ins   | 0.001  | -0.017, 0.018  | 0.08  | 0.940        | 0.987 |
| lh_G_insular_short           | -0.017 | -0.038, 0.005  | -1.52 | 0.130        | 0.845 |
| lh_G_occipital_middle        | -0.003 | -0.027, 0.022  | -0.21 | 0.833        | 0.987 |
| lh_G_occipital_sup           | -0.031 | -0.058, -0.004 | -2.24 | <b>0.026</b> | 0.478 |
| lh_G_oc.temp_lat.fusifor     | -0.032 | -0.066, 0.002  | -1.86 | 0.064        | 0.845 |
| lh_G_oc.temp_med.Lingual     | -0.027 | -0.05, -0.004  | -2.32 | <b>0.021</b> | 0.478 |
| lh_G_oc.temp_med.Parahip     | -0.032 | -0.068, 0.004  | -1.73 | 0.085        | 0.845 |
| lh_G_orbital                 | 0.001  | -0.019, 0.021  | 0.10  | 0.923        | 0.987 |
| lh_G_pariet_inf.Angular      | 0.002  | -0.015, 0.02   | 0.27  | 0.789        | 0.987 |
| lh_G_pariet_inf.Supramar     | -0.015 | -0.034, 0.004  | -1.58 | 0.115        | 0.845 |
| lh_G_parietal_sup            | -0.002 | -0.022, 0.018  | -0.19 | 0.849        | 0.987 |
| lh_G_postcentral             | -0.006 | -0.022, 0.01   | -0.74 | 0.458        | 0.987 |
| lh_G_precentral              | -0.016 | -0.035, 0.003  | -1.66 | 0.098        | 0.845 |
| lh_G_precuneus               | -0.017 | -0.085, 0.051  | -0.49 | 0.623        | 0.987 |
| lh_G_rectus                  | -0.005 | -0.039, 0.029  | -0.32 | 0.751        | 0.987 |
| lh_G_subcallosal             | -0.014 | -0.037, 0.009  | -1.18 | 0.237        | 0.899 |
| lh_G_temp_sup.G_T_transv     | -0.002 | -0.018, 0.014  | -0.22 | 0.830        | 0.987 |
| lh_G_temp_sup.Lateral        | 0.000  | -0.018, 0.018  | -0.03 | 0.974        | 0.987 |
| lh_G_temp_sup.Plan_polar     | -0.025 | -0.044, -0.006 | -2.60 | <b>0.010</b> | 0.478 |
| lh_G_temp_sup.Plan_tempo     | 0.001  | -0.032, 0.034  | 0.04  | 0.968        | 0.987 |
| lh_G_temporal_inf            | -0.007 | -0.029, 0.015  | -0.63 | 0.526        | 0.987 |
| lh_G_temporal_middle         | 0.015  | -0.012, 0.043  | 1.11  | 0.267        | 0.899 |
| lh_Lat_Fis.ant.Horizontal    | -0.001 | -0.031, 0.029  | -0.08 | 0.939        | 0.987 |
| lh_Lat_Fis.ant.Vertical      | -0.013 | -0.036, 0.009  | -1.17 | 0.243        | 0.899 |
| lh_Lat_Fis.post              | 0.014  | -0.026, 0.054  | 0.69  | 0.490        | 0.987 |
| lh_Pole_occipital            | 0.010  | -0.02, 0.039   | 0.63  | 0.532        | 0.987 |
| lh_Pole_temporal             | -0.033 | -0.066, -0.001 | -2.04 | <b>0.042</b> | 0.641 |
| lh_S_calcarine               | -0.012 | -0.033, 0.009  | -1.12 | 0.263        | 0.899 |
| lh_S_central                 | -0.022 | -0.04, -0.004  | -2.37 | <b>0.018</b> | 0.478 |
| lh_S_cingul.Marginalis       | 0.004  | -0.018, 0.026  | 0.37  | 0.712        | 0.987 |
| lh_S_circular_insula_ant     | -0.012 | -0.03, 0.006   | -1.33 | 0.183        | 0.845 |
| lh_S_circular_insula_inf     | -0.004 | -0.024, 0.016  | -0.39 | 0.700        | 0.987 |
| lh_S_circular_insula_sup     | -0.010 | -0.042, 0.021  | -0.65 | 0.517        | 0.987 |
| lh_S_collat_transv_ant       | -0.024 | -0.059, 0.011  | -1.36 | 0.173        | 0.845 |
| lh_S_collat_transv_post      | 0.010  | -0.014, 0.033  | 0.80  | 0.424        | 0.987 |
| lh_S_front_inf               | 0.001  | -0.023, 0.024  | 0.06  | 0.954        | 0.987 |
| lh_S_front_middle            | 0.000  | -0.017, 0.017  | -0.04 | 0.971        | 0.987 |
| lh_S_front_sup               | 0.006  | -0.019, 0.03   | 0.45  | 0.651        | 0.987 |
| lh_S_interm_prim.Jensen      | -0.001 | -0.022, 0.02   | -0.08 | 0.932        | 0.987 |
| lh_S_intrapariet_and_P_trans | -0.018 | -0.047, 0.012  | -1.18 | 0.238        | 0.899 |

**eTable 15. Differences in functional activity between the never-suicidal group and the caregiver-reported suicidality group for anticipation of loss: Welch's t-test**

| ROIs                         | Mean   | 95%CI          | t     | p (unc)      | p FDR |
|------------------------------|--------|----------------|-------|--------------|-------|
| lh_S_oc_middle_and_Lunatus   | -0.014 | -0.038, 0.01   | -1.13 | 0.258        | 0.899 |
| lh_S_oc_sup_and_transversal  | 0.001  | -0.02, 0.022   | 0.07  | 0.941        | 0.987 |
| lh_S_occipital_ant           | -0.010 | -0.03, 0.009   | -1.02 | 0.310        | 0.954 |
| lh_S_oc.temp_lat             | -0.026 | -0.046, -0.005 | -2.44 | <b>0.015</b> | 0.478 |
| lh_S_oc.temp_med_and_Lingual | 0.015  | -0.018, 0.048  | 0.88  | 0.382        | 0.987 |
| lh_S_orbital_lateral         | 0.008  | -0.048, 0.065  | 0.29  | 0.771        | 0.987 |
| lh_S_orbital_med.olfact      | -0.008 | -0.037, 0.02   | -0.58 | 0.559        | 0.987 |
| lh_S_orbital.H_Shaped        | -0.001 | -0.023, 0.02   | -0.10 | 0.917        | 0.987 |
| lh_S_parieto_occipital       | 0.012  | -0.009, 0.034  | 1.11  | 0.270        | 0.899 |
| lh_S_pericallosal            | -0.002 | -0.021, 0.016  | -0.27 | 0.790        | 0.987 |
| lh_S_postcentral             | 0.003  | -0.02, 0.025   | 0.24  | 0.810        | 0.987 |
| lh_S_precentral.inf.part     | -0.003 | -0.02, 0.014   | -0.35 | 0.727        | 0.987 |
| lh_S_precentral.sup.part     | 0.015  | -0.032, 0.062  | 0.62  | 0.533        | 0.987 |
| lh_S_suborbital              | -0.002 | -0.027, 0.023  | -0.17 | 0.864        | 0.987 |
| lh_S_subparietal             | -0.015 | -0.045, 0.015  | -1.00 | 0.320        | 0.954 |
| lh_S_temporal_inf            | -0.002 | -0.021, 0.017  | -0.22 | 0.827        | 0.987 |
| lh_S_temporal_sup            | -0.023 | -0.051, 0.006  | -1.57 | 0.116        | 0.845 |
| lh_S_temporal_transverse     | -0.028 | -0.07, 0.014   | -1.30 | 0.194        | 0.845 |
| rh_G_and_S_frontomargin      | -0.022 | -0.053, 0.008  | -1.42 | 0.155        | 0.845 |
| rh_G_and_S_occipital_inf     | -0.009 | -0.03, 0.012   | -0.82 | 0.414        | 0.987 |
| rh_G_and_S_paracentral       | -0.013 | -0.034, 0.009  | -1.16 | 0.248        | 0.899 |
| rh_G_and_S_subcentral        | -0.009 | -0.043, 0.024  | -0.56 | 0.575        | 0.987 |
| rh_G_and_S_transv_frontopol  | 0.003  | -0.018, 0.025  | 0.30  | 0.765        | 0.987 |
| rh_G_and_S_cingul.Ant        | 0.000  | -0.017, 0.018  | 0.02  | 0.982        | 0.988 |
| rh_G_and_S_cingul.Mid.Ant    | -0.003 | -0.02, 0.013   | -0.42 | 0.674        | 0.987 |
| rh_G_and_S_cingul.Mid.Post   | 0.001  | -0.019, 0.02   | 0.07  | 0.941        | 0.987 |
| rh_G_cingul.Post.dorsal      | -0.011 | -0.046, 0.023  | -0.65 | 0.519        | 0.987 |
| rh_G_cingul.Post.ventral     | -0.009 | -0.042, 0.023  | -0.57 | 0.569        | 0.987 |
| rh_G_cuneus                  | 0.002  | -0.017, 0.022  | 0.24  | 0.812        | 0.987 |
| rh_G_front_inf.Opercular     | 0.021  | -0.01, 0.052   | 1.36  | 0.175        | 0.845 |
| rh_G_front_inf.Orbital       | 0.011  | -0.012, 0.035  | 0.93  | 0.350        | 0.987 |
| rh_G_front_inf.Triangul      | -0.006 | -0.026, 0.015  | -0.52 | 0.601        | 0.987 |
| rh_G_front_middle            | -0.005 | -0.02, 0.01    | -0.60 | 0.550        | 0.987 |
| rh_G_front_sup               | -0.012 | -0.034, 0.011  | -1.02 | 0.309        | 0.954 |
| rh_G_Ins_lg_and_S_cent_ins   | -0.002 | -0.02, 0.017   | -0.17 | 0.862        | 0.987 |
| rh_G_insular_short           | -0.015 | -0.036, 0.006  | -1.39 | 0.166        | 0.845 |
| rh_G_occipital_middle        | -0.012 | -0.035, 0.011  | -1.00 | 0.316        | 0.954 |
| rh_G_occipital_sup           | -0.021 | -0.048, 0.005  | -1.58 | 0.114        | 0.845 |
| rh_G_oc.temp_lat.fusifor     | -0.028 | -0.061, 0.006  | -1.61 | 0.109        | 0.845 |
| rh_G_oc.temp_med.Lingual     | -0.006 | -0.033, 0.02   | -0.45 | 0.653        | 0.987 |
| rh_G_oc.temp_med.Parahip     | -0.008 | -0.048, 0.032  | -0.40 | 0.691        | 0.987 |
| rh_G_orbital                 | 0.002  | -0.018, 0.022  | 0.21  | 0.832        | 0.987 |
| rh_G_pariet_inf.Angular      | -0.001 | -0.019, 0.016  | -0.14 | 0.890        | 0.987 |

**eTable 15. Differences in functional activity between the never-suicidal group and the caregiver-reported suicidality group for anticipation of loss: Welch's t-test**

| ROIs                         | Mean   | 95%CI          | t     | p (unc)      | p FDR |
|------------------------------|--------|----------------|-------|--------------|-------|
| rh_G_pariet_inf.Supramar     | -0.004 | -0.023, 0.015  | -0.43 | 0.668        | 0.987 |
| rh_G_parietal_sup            | -0.014 | -0.035, 0.007  | -1.29 | 0.197        | 0.845 |
| rh_G_postcentral             | -0.001 | -0.016, 0.014  | -0.16 | 0.870        | 0.987 |
| rh_G_precentral              | -0.009 | -0.028, 0.01   | -0.89 | 0.373        | 0.987 |
| rh_G_precuneus               | 0.008  | -0.069, 0.086  | 0.21  | 0.831        | 0.987 |
| rh_G_rectus                  | -0.040 | -0.073, -0.006 | -2.34 | <b>0.020</b> | 0.478 |
| rh_G_subcallosal             | 0.003  | -0.019, 0.025  | 0.26  | 0.796        | 0.987 |
| rh_G_temp_sup.G_T_transv     | -0.006 | -0.023, 0.012  | -0.65 | 0.518        | 0.987 |
| rh_G_temp_sup.Lateral        | 0.009  | -0.009, 0.028  | 1.00  | 0.320        | 0.954 |
| rh_G_temp_sup.Plan_polar     | -0.006 | -0.026, 0.014  | -0.58 | 0.565        | 0.987 |
| rh_G_temp_sup.Plan_tempo     | 0.006  | -0.027, 0.039  | 0.36  | 0.722        | 0.987 |
| rh_G_temporal_inf            | 0.002  | -0.019, 0.024  | 0.22  | 0.824        | 0.987 |
| rh_G_temporal_middle         | 0.001  | -0.024, 0.026  | 0.06  | 0.952        | 0.987 |
| rh_Lat_Fis.ant.Horizontal    | 0.002  | -0.029, 0.032  | 0.10  | 0.922        | 0.987 |
| rh_Lat_Fis.ant.Vertical      | -0.009 | -0.033, 0.015  | -0.74 | 0.459        | 0.987 |
| rh_Lat_Fis.post              | -0.016 | -0.055, 0.023  | -0.81 | 0.419        | 0.987 |
| rh_Pole_occipital            | -0.014 | -0.048, 0.02   | -0.80 | 0.423        | 0.987 |
| rh_Pole_temporal             | -0.036 | -0.068, -0.004 | -2.24 | <b>0.025</b> | 0.478 |
| rh_S_calcarine               | -0.015 | -0.037, 0.006  | -1.39 | 0.164        | 0.845 |
| rh_S_central                 | -0.013 | -0.032, 0.005  | -1.43 | 0.153        | 0.845 |
| rh_S_cingul.Marginalis       | -0.001 | -0.022, 0.02   | -0.09 | 0.926        | 0.987 |
| rh_S_circular_insula_ant     | 0.003  | -0.017, 0.024  | 0.31  | 0.757        | 0.987 |
| rh_S_circular_insula_inf     | 0.010  | -0.011, 0.03   | 0.92  | 0.356        | 0.987 |
| rh_S_circular_insula_sup     | -0.009 | -0.042, 0.025  | -0.51 | 0.613        | 0.987 |
| rh_S_collat_transv_ant       | -0.022 | -0.055, 0.011  | -1.32 | 0.187        | 0.845 |
| rh_S_collat_transv_post      | 0.001  | -0.022, 0.024  | 0.09  | 0.930        | 0.987 |
| rh_S_front_inf               | 0.001  | -0.022, 0.024  | 0.10  | 0.917        | 0.987 |
| rh_S_front_middle            | -0.001 | -0.019, 0.016  | -0.15 | 0.881        | 0.987 |
| rh_S_front_sup               | 0.002  | -0.021, 0.025  | 0.19  | 0.850        | 0.987 |
| rh_S_interm_prim.Jensen      | 0.009  | -0.012, 0.029  | 0.85  | 0.397        | 0.987 |
| rh_S_intrapariet_and_P_trans | -0.029 | -0.057, -0.001 | -2.04 | <b>0.042</b> | 0.641 |
| rh_S_oc_middle_and_Lunatus   | -0.008 | -0.03, 0.014   | -0.71 | 0.480        | 0.987 |
| rh_S_oc_sup_and_transversal  | -0.002 | -0.022, 0.018  | -0.16 | 0.876        | 0.987 |
| rh_S_occipital_ant           | 0.008  | -0.013, 0.029  | 0.79  | 0.432        | 0.987 |
| rh_S_oc.temp_lat             | -0.006 | -0.027, 0.016  | -0.53 | 0.599        | 0.987 |
| rh_S_oc.temp_med_and_Lingual | 0.022  | -0.011, 0.055  | 1.31  | 0.192        | 0.845 |
| rh_S_orbital_lateral         | 0.000  | -0.06, 0.061   | 0.01  | 0.990        | 0.990 |
| rh_S_orbital_med.olfact      | -0.013 | -0.041, 0.015  | -0.90 | 0.367        | 0.987 |
| rh_S_orbital.H_Shaped        | 0.003  | -0.018, 0.025  | 0.31  | 0.755        | 0.987 |
| rh_S_parieto_occipital       | 0.001  | -0.025, 0.028  | 0.11  | 0.911        | 0.987 |
| rh_S_pericallosal            | -0.006 | -0.023, 0.011  | -0.70 | 0.484        | 0.987 |
| rh_S_postcentral             | 0.005  | -0.017, 0.027  | 0.47  | 0.636        | 0.987 |
| rh_S_precentral.inf.part     | -0.006 | -0.023, 0.012  | -0.65 | 0.515        | 0.987 |

**eTable 15. Differences in functional activity between the never-suicidal group and the caregiver-reported suicidality group for anticipation of loss: Welch's t-test**

| ROIs                     | Mean   | 95%CI         | t     | p (unc) | p FDR |
|--------------------------|--------|---------------|-------|---------|-------|
| rh_S_precentral.sup.part | -0.041 | -0.108, 0.025 | -1.23 | 0.218   | 0.885 |
| rh_S_suborbital          | -0.002 | -0.025, 0.02  | -0.19 | 0.846   | 0.987 |
| rh_S_subparietal         | -0.001 | -0.033, 0.032 | -0.03 | 0.975   | 0.987 |
| rh_S_temporal_inf        | 0.008  | -0.01, 0.025  | 0.87  | 0.386   | 0.987 |
| rh_S_temporal_sup        | -0.006 | -0.034, 0.022 | -0.41 | 0.684   | 0.987 |
| rh_S_temporal_transverse | 0.032  | -0.008, 0.072 | 1.55  | 0.122   | 0.845 |

**Bold** denotes group differences at p<0.05 uncorrected

**eTable 16. Differences in functional activity between the never-suicidal group and the concordantly-reported suicidality group for anticipation of loss: Welch's t-test**

| ROIs                       | Mean   | 95%CI         | t     | p (unc)      | p FDR |
|----------------------------|--------|---------------|-------|--------------|-------|
| <b>Subcortical regions</b> |        |               |       |              |       |
| Left.Cerebellum.Cortex     | -0.007 | -0.061, 0.046 | -0.27 | 0.787        | 0.977 |
| Left.Thalamus.Proper       | -0.009 | -0.039, 0.022 | -0.58 | 0.566        | 0.977 |
| Left.Caudate               | -0.017 | -0.057, 0.024 | -0.83 | 0.410        | 0.977 |
| Left.Putamen               | -0.001 | -0.034, 0.031 | -0.07 | 0.945        | 0.977 |
| Left.Pallidum              | 0.019  | -0.016, 0.054 | 1.05  | 0.295        | 0.977 |
| Brain.Stem                 | -0.001 | -0.035, 0.033 | -0.07 | 0.944        | 0.977 |
| Left.Hippocampus           | 0.004  | -0.03, 0.038  | 0.22  | 0.827        | 0.977 |
| Left.Amygdala              | 0.012  | -0.03, 0.053  | 0.55  | 0.584        | 0.977 |
| Left.Accumbens.area        | 0.025  | -0.029, 0.078 | 0.92  | 0.361        | 0.977 |
| Left.VentralDC             | -0.006 | -0.044, 0.031 | -0.34 | 0.734        | 0.977 |
| Right.Cerebellum.Cortex    | 0.003  | -0.05, 0.057  | 0.13  | 0.897        | 0.977 |
| Right.Thalamus.Proper      | -0.004 | -0.039, 0.031 | -0.25 | 0.804        | 0.977 |
| Right.Caudate              | -0.006 | -0.051, 0.039 | -0.26 | 0.799        | 0.977 |
| Right.Putamen              | 0.010  | -0.025, 0.045 | 0.56  | 0.575        | 0.977 |
| Right.Pallidum             | 0.018  | -0.018, 0.055 | 1.00  | 0.319        | 0.977 |
| Right.Hippocampus          | 0.017  | -0.015, 0.05  | 1.06  | 0.290        | 0.977 |
| Right.Amygdala             | 0.011  | -0.028, 0.05  | 0.57  | 0.567        | 0.977 |
| Right.Accumbens.area       | 0.038  | -0.009, 0.086 | 1.60  | 0.112        | 0.850 |
| Right.VentralDC            | 0.004  | -0.037, 0.045 | 0.21  | 0.832        | 0.977 |
| <b>Cortical regions</b>    |        |               |       |              |       |
| lh_G_and_S_frontomargin    | -0.009 | -0.067, 0.05  | -0.29 | 0.770        | 0.977 |
| lh_G_and_S_occipital_inf   | -0.019 | -0.059, 0.021 | -0.94 | 0.352        | 0.977 |
| lh_G_and_S_paracentral     | -0.059 | -0.1, -0.019  | -2.90 | <b>0.005</b> | 0.394 |
| lh_G_and_S_subcentral      | 0.039  | -0.039, 0.118 | 1.00  | 0.320        | 0.977 |

**eTable 16. Differences in functional activity between the never-suicidal group and the concordantly-reported suicidality group for anticipation of loss: Welch's t-test**

| ROIs                        | Mean   | 95%CI          | t     | p (unc)      | p FDR |
|-----------------------------|--------|----------------|-------|--------------|-------|
| lh_G_and_S_transv_frontopol | -0.015 | -0.054, 0.023  | -0.79 | 0.433        | 0.977 |
| lh_G_and_S_cingul.Ant       | -0.016 | -0.051, 0.019  | -0.92 | 0.360        | 0.977 |
| lh_G_and_S_cingul.Mid.Ant   | -0.022 | -0.054, 0.01   | -1.36 | 0.177        | 0.942 |
| lh_G_and_S_cingul.Mid.Post  | -0.002 | -0.039, 0.036  | -0.10 | 0.919        | 0.977 |
| lh_G_cingul.Post.dorsal     | -0.045 | -0.115, 0.024  | -1.29 | 0.201        | 0.958 |
| lh_G_cingul.Post.ventral    | -0.021 | -0.082, 0.041  | -0.67 | 0.505        | 0.977 |
| lh_G_cuneus                 | -0.036 | -0.071, -0.001 | -2.06 | <b>0.042</b> | 0.782 |
| lh_G_front_inf.Opercular    | 0.012  | -0.047, 0.071  | 0.41  | 0.681        | 0.977 |
| lh_G_front_inf.Orbital      | -0.014 | -0.065, 0.037  | -0.53 | 0.597        | 0.977 |
| lh_G_front_inf.Triangul     | -0.014 | -0.053, 0.025  | -0.70 | 0.487        | 0.977 |
| lh_G_front_middle           | -0.001 | -0.027, 0.025  | -0.11 | 0.912        | 0.977 |
| lh_G_front_sup              | -0.056 | -0.094, -0.017 | -2.89 | <b>0.005</b> | 0.394 |
| lh_G_Ins_lg_and_S_cent_ins  | 0.002  | -0.03, 0.033   | 0.10  | 0.919        | 0.977 |
| lh_G_insular_short          | -0.011 | -0.05, 0.028   | -0.54 | 0.588        | 0.977 |
| lh_G_occipital_middle       | 0.033  | -0.012, 0.078  | 1.45  | 0.150        | 0.920 |
| lh_G_occipital_sup          | -0.009 | -0.061, 0.044  | -0.33 | 0.742        | 0.977 |
| lh_G_oc.temp_lat.fusifor    | -0.010 | -0.076, 0.056  | -0.31 | 0.757        | 0.977 |
| lh_G_oc.temp_med.Lingual    | -0.036 | -0.082, 0.01   | -1.54 | 0.126        | 0.856 |
| lh_G_oc.temp_med.Parahip    | -0.007 | -0.069, 0.056  | -0.21 | 0.834        | 0.977 |
| lh_G_orbital                | -0.010 | -0.045, 0.026  | -0.53 | 0.595        | 0.977 |
| lh_G_pariet_inf.Angular     | -0.037 | -0.066, -0.007 | -2.46 | <b>0.016</b> | 0.646 |
| lh_G_pariet_inf.Supramar    | -0.023 | -0.056, 0.01   | -1.39 | 0.168        | 0.942 |
| lh_G_parietal_sup           | -0.009 | -0.046, 0.028  | -0.50 | 0.620        | 0.977 |
| lh_G_postcentral            | -0.008 | -0.037, 0.02   | -0.57 | 0.568        | 0.977 |
| lh_G_precentral             | -0.032 | -0.065, 0.002  | -1.85 | 0.067        | 0.791 |
| lh_G_precuneus              | 0.015  | -0.115, 0.146  | 0.23  | 0.816        | 0.977 |
| lh_G_rectus                 | 0.007  | -0.056, 0.07   | 0.22  | 0.827        | 0.977 |
| lh_G_subcallosal            | -0.042 | -0.083, -0.002 | -2.07 | <b>0.041</b> | 0.782 |
| lh_G_temp_sup.G_T_transv    | -0.009 | -0.038, 0.02   | -0.60 | 0.547        | 0.977 |
| lh_G_temp_sup.Lateral       | 0.010  | -0.022, 0.042  | 0.63  | 0.531        | 0.977 |
| lh_G_temp_sup.Plan_polar    | -0.037 | -0.072, -0.002 | -2.09 | <b>0.039</b> | 0.782 |
| lh_G_temp_sup.Plan_tempo    | -0.006 | -0.069, 0.057  | -0.19 | 0.848        | 0.977 |
| lh_G_temporal_inf           | -0.019 | -0.059, 0.021  | -0.93 | 0.356        | 0.977 |
| lh_G_temporal_middle        | 0.026  | -0.027, 0.08   | 0.98  | 0.332        | 0.977 |
| lh_Lat_Fis.ant.Horizontal   | -0.036 | -0.095, 0.024  | -1.19 | 0.238        | 0.977 |
| lh_Lat_Fis.ant.Vertical     | -0.029 | -0.072, 0.014  | -1.35 | 0.181        | 0.942 |
| lh_Lat_Fis.post             | 0.038  | -0.038, 0.113  | 0.99  | 0.323        | 0.977 |
| lh_Pole_occipital           | 0.032  | -0.022, 0.085  | 1.17  | 0.244        | 0.977 |
| lh_Pole_temporal            | -0.048 | -0.107, 0.011  | -1.62 | 0.109        | 0.850 |
| lh_S_calcarine              | -0.031 | -0.068, 0.006  | -1.67 | 0.098        | 0.850 |
| lh_S_central                | -0.047 | -0.083, -0.011 | -2.62 | <b>0.010</b> | 0.572 |
| lh_S_cingul.Marginalis      | 0.007  | -0.032, 0.046  | 0.34  | 0.737        | 0.977 |
| lh_S_circular_insula_ant    | -0.016 | -0.048, 0.017  | -0.96 | 0.338        | 0.977 |

**eTable 16. Differences in functional activity between the never-suicidal group and the concordantly-reported suicidality group for anticipation of loss: Welch's t-test**

| ROIs                         | Mean   | 95%CI          | t     | p (unc)      | p FDR |
|------------------------------|--------|----------------|-------|--------------|-------|
| lh_S_circular_insula_inf     | -0.029 | -0.067, 0.009  | -1.53 | 0.128        | 0.856 |
| lh_S_circular_insula_sup     | 0.004  | -0.055, 0.063  | 0.13  | 0.893        | 0.977 |
| lh_S_collat_transv_ant       | 0.026  | -0.037, 0.089  | 0.82  | 0.416        | 0.977 |
| lh_S_collat_transv_post      | 0.000  | -0.043, 0.042  | -0.01 | 0.989        | 0.995 |
| lh_S_front_inf               | 0.001  | -0.046, 0.047  | 0.03  | 0.974        | 0.986 |
| lh_S_front_middle            | -0.008 | -0.039, 0.023  | -0.51 | 0.610        | 0.977 |
| lh_S_front_sup               | -0.018 | -0.07, 0.033   | -0.71 | 0.477        | 0.977 |
| lh_S_interm_prim.Jensen      | -0.014 | -0.051, 0.024  | -0.72 | 0.476        | 0.977 |
| lh_S_intrapariet_and_P_trans | -0.017 | -0.072, 0.037  | -0.63 | 0.530        | 0.977 |
| lh_S_oc_middle_and_Lunatus   | -0.013 | -0.059, 0.032  | -0.58 | 0.560        | 0.977 |
| lh_S_oc_sup_and_transversal  | -0.012 | -0.056, 0.032  | -0.55 | 0.584        | 0.977 |
| lh_S_occipital_ant           | -0.010 | -0.048, 0.027  | -0.54 | 0.589        | 0.977 |
| lh_S_oc.temp_lat             | -0.015 | -0.053, 0.024  | -0.75 | 0.454        | 0.977 |
| lh_S_oc.temp_med_and_Lingual | 0.062  | 0.005, 0.118   | 2.17  | <b>0.032</b> | 0.782 |
| lh_S_orbital_lateral         | 0.022  | -0.099, 0.144  | 0.37  | 0.714        | 0.977 |
| lh_S_orbital_med.olfact      | -0.026 | -0.077, 0.025  | -1.03 | 0.308        | 0.977 |
| lh_S_orbital.H_Shaped        | -0.006 | -0.044, 0.031  | -0.35 | 0.731        | 0.977 |
| lh_S_parieto_occipital       | 0.016  | -0.022, 0.053  | 0.82  | 0.416        | 0.977 |
| lh_S_pericallosal            | -0.013 | -0.048, 0.023  | -0.70 | 0.485        | 0.977 |
| lh_S_postcentral             | -0.015 | -0.055, 0.025  | -0.74 | 0.459        | 0.977 |
| lh_S_precentral.inf.part     | -0.013 | -0.046, 0.02   | -0.78 | 0.438        | 0.977 |
| lh_S_precentral.sup.part     | 0.021  | -0.077, 0.12   | 0.43  | 0.667        | 0.977 |
| lh_S_suborbital              | -0.011 | -0.057, 0.036  | -0.46 | 0.646        | 0.977 |
| lh_S_subparietal             | 0.021  | -0.035, 0.077  | 0.74  | 0.458        | 0.977 |
| lh_S_temporal_inf            | -0.014 | -0.047, 0.02   | -0.82 | 0.411        | 0.977 |
| lh_S_temporal_sup            | -0.040 | -0.091, 0.01   | -1.58 | 0.118        | 0.856 |
| lh_S_temporal_transverse     | 0.039  | -0.033, 0.111  | 1.06  | 0.290        | 0.977 |
| rh_G_and_S_frontomargin      | -0.005 | -0.062, 0.052  | -0.16 | 0.870        | 0.977 |
| rh_G_and_S_occipital_inf     | -0.030 | -0.072, 0.011  | -1.44 | 0.154        | 0.920 |
| rh_G_and_S_paracentral       | -0.046 | -0.085, -0.008 | -2.38 | <b>0.019</b> | 0.646 |
| rh_G_and_S_subcentral        | 0.015  | -0.045, 0.075  | 0.49  | 0.622        | 0.977 |
| rh_G_and_S_transv_frontopol  | 0.016  | -0.026, 0.059  | 0.77  | 0.444        | 0.977 |
| rh_G_and_S_cingul.Ant        | -0.004 | -0.039, 0.03   | -0.24 | 0.807        | 0.977 |
| rh_G_and_S_cingul.Mid.Ant    | -0.023 | -0.054, 0.008  | -1.46 | 0.147        | 0.920 |
| rh_G_and_S_cingul.Mid.Post   | 0.012  | -0.023, 0.046  | 0.67  | 0.505        | 0.977 |
| rh_G_cingul.Post.dorsal      | -0.016 | -0.08, 0.049   | -0.48 | 0.632        | 0.977 |
| rh_G_cingul.Post.ventral     | -0.023 | -0.085, 0.038  | -0.75 | 0.455        | 0.977 |
| rh_G_cuneus                  | -0.004 | -0.037, 0.03   | -0.21 | 0.831        | 0.977 |
| rh_G_front_inf.Opercular     | 0.016  | -0.039, 0.071  | 0.58  | 0.561        | 0.977 |
| rh_G_front_inf.Orbital       | 0.006  | -0.032, 0.043  | 0.30  | 0.762        | 0.977 |
| rh_G_front_inf.Triangul      | 0.013  | -0.026, 0.051  | 0.64  | 0.525        | 0.977 |
| rh_G_front_middle            | 0.006  | -0.019, 0.031  | 0.46  | 0.644        | 0.977 |
| rh_G_front_sup               | -0.015 | -0.056, 0.025  | -0.74 | 0.459        | 0.977 |

**eTable 16. Differences in functional activity between the never-suicidal group and the concordantly-reported suicidality group for anticipation of loss: Welch's t-test**

| ROIs                         | Mean   | 95%CI         | t     | p (unc) | p FDR |
|------------------------------|--------|---------------|-------|---------|-------|
| rh_G_Ins_lg_and_S_cent_ins   | -0.008 | -0.039, 0.023 | -0.52 | 0.606   | 0.977 |
| rh_G_insular_short           | -0.003 | -0.04, 0.035  | -0.13 | 0.894   | 0.977 |
| rh_G_occipital_middle        | -0.003 | -0.048, 0.041 | -0.15 | 0.884   | 0.977 |
| rh_G_occipital_sup           | -0.020 | -0.071, 0.032 | -0.76 | 0.448   | 0.977 |
| rh_G_oc.temp_lat.fusifor     | -0.040 | -0.101, 0.021 | -1.30 | 0.198   | 0.958 |
| rh_G_oc.temp_med.Lingual     | 0.001  | -0.047, 0.049 | 0.04  | 0.967   | 0.985 |
| rh_G_oc.temp_med.Parahip     | 0.060  | -0.014, 0.133 | 1.60  | 0.112   | 0.850 |
| rh_G_orbital                 | 0.004  | -0.029, 0.037 | 0.24  | 0.809   | 0.977 |
| rh_G_pariet_inf.Angular      | -0.021 | -0.054, 0.011 | -1.29 | 0.200   | 0.958 |
| rh_G_pariet_inf.Supramar     | -0.015 | -0.049, 0.02  | -0.84 | 0.401   | 0.977 |
| rh_G_parietal_sup            | -0.021 | -0.058, 0.016 | -1.13 | 0.262   | 0.977 |
| rh_G_postcentral             | -0.004 | -0.031, 0.023 | -0.31 | 0.757   | 0.977 |
| rh_G_precentral              | -0.016 | -0.052, 0.02  | -0.88 | 0.379   | 0.977 |
| rh_G_precuneus               | -0.010 | -0.141, 0.121 | -0.15 | 0.884   | 0.977 |
| rh_G_rectus                  | -0.036 | -0.1, 0.028   | -1.12 | 0.265   | 0.977 |
| rh_G_subcallosal             | 0.005  | -0.037, 0.047 | 0.23  | 0.817   | 0.977 |
| rh_G_temp_sup.G_T_transv     | 0.006  | -0.024, 0.037 | 0.42  | 0.677   | 0.977 |
| rh_G_temp_sup.Lateral        | 0.030  | -0.001, 0.06  | 1.93  | 0.057   | 0.791 |
| rh_G_temp_sup.Plan_polar     | -0.035 | -0.071, 0.001 | -1.90 | 0.060   | 0.791 |
| rh_G_temp_sup.Plan_tempo     | 0.013  | -0.045, 0.071 | 0.45  | 0.653   | 0.977 |
| rh_G_temporal_inf            | 0.006  | -0.034, 0.045 | 0.29  | 0.773   | 0.977 |
| rh_G_temporal_middle         | -0.006 | -0.055, 0.043 | -0.24 | 0.813   | 0.977 |
| rh_Lat_Fis.ant.Horizontal    | -0.009 | -0.058, 0.039 | -0.37 | 0.711   | 0.977 |
| rh_Lat_Fis.ant.Vertical      | -0.034 | -0.076, 0.008 | -1.63 | 0.107   | 0.850 |
| rh_Lat_Fis.post              | 0.006  | -0.065, 0.078 | 0.17  | 0.865   | 0.977 |
| rh_Pole_occipital            | 0.060  | -0.003, 0.124 | 1.88  | 0.064   | 0.791 |
| rh_Pole_temporal             | -0.041 | -0.101, 0.019 | -1.35 | 0.179   | 0.942 |
| rh_S_calcarine               | -0.039 | -0.079, 0.002 | -1.88 | 0.063   | 0.791 |
| rh_S_central                 | -0.032 | -0.068, 0.005 | -1.72 | 0.088   | 0.850 |
| rh_S_cingul.Marginalis       | 0.003  | -0.037, 0.043 | 0.13  | 0.893   | 0.977 |
| rh_S_circular_insula_ant     | 0.014  | -0.022, 0.05  | 0.76  | 0.449   | 0.977 |
| rh_S_circular_insula_inf     | -0.006 | -0.046, 0.034 | -0.31 | 0.754   | 0.977 |
| rh_S_circular_insula_sup     | 0.002  | -0.06, 0.064  | 0.06  | 0.954   | 0.977 |
| rh_S_collat_transv_ant       | -0.002 | -0.064, 0.059 | -0.07 | 0.942   | 0.977 |
| rh_S_collat_transv_post      | 0.002  | -0.04, 0.044  | 0.09  | 0.928   | 0.977 |
| rh_S_front_inf               | 0.005  | -0.037, 0.047 | 0.22  | 0.830   | 0.977 |
| rh_S_front_middle            | 0.002  | -0.028, 0.033 | 0.15  | 0.881   | 0.977 |
| rh_S_front_sup               | -0.002 | -0.044, 0.04  | -0.08 | 0.936   | 0.977 |
| rh_S_interm_prim.Jensen      | 0.000  | -0.036, 0.036 | 0.00  | 0.997   | 0.997 |
| rh_S_intrapariet_and_P_trans | -0.013 | -0.066, 0.04  | -0.48 | 0.629   | 0.977 |
| rh_S_oc_middle_and_Lunatus   | -0.004 | -0.047, 0.04  | -0.16 | 0.870   | 0.977 |
| rh_S_oc_sup_and_transversal  | 0.017  | -0.021, 0.055 | 0.87  | 0.385   | 0.977 |
| rh_S_occipital_ant           | -0.005 | -0.041, 0.031 | -0.27 | 0.786   | 0.977 |

**eTable 16. Differences in functional activity between the never-suicidal group and the concordantly-reported suicidality group for anticipation of loss: Welch's t-test**

| <b>ROIs</b>                  | <b>Mean</b> | <b>95%CI</b>  | <b>t</b> | <b>p (unc)</b> | <b>p FDR</b> |
|------------------------------|-------------|---------------|----------|----------------|--------------|
| rh_S_oc.temp_lat             | -0.022      | -0.064, 0.02  | -1.05    | 0.297          | 0.977        |
| rh_S_oc.temp_med_and_Lingual | 0.050       | -0.007, 0.108 | 1.75     | 0.084          | 0.850        |
| rh_S_orbital_lateral         | 0.007       | -0.107, 0.122 | 0.13     | 0.897          | 0.977        |
| rh_S_orbital_med.olfact      | 0.013       | -0.031, 0.057 | 0.60     | 0.552          | 0.977        |
| rh_S_orbital.H_Shaped        | -0.013      | -0.053, 0.028 | -0.63    | 0.530          | 0.977        |
| rh_S_parieto_occipital       | 0.005       | -0.044, 0.053 | 0.19     | 0.852          | 0.977        |
| rh_S_pericallosal            | -0.016      | -0.049, 0.017 | -0.97    | 0.335          | 0.977        |
| rh_S_postcentral             | -0.004      | -0.04, 0.032  | -0.23    | 0.820          | 0.977        |
| rh_S_precentral.inf.part     | -0.016      | -0.048, 0.017 | -0.96    | 0.339          | 0.977        |
| rh_S_precentral.sup.part     | 0.004       | -0.119, 0.127 | 0.06     | 0.951          | 0.977        |
| rh_S_suborbital              | 0.003       | -0.037, 0.043 | 0.16     | 0.877          | 0.977        |
| rh_S_subparietal             | 0.005       | -0.051, 0.061 | 0.17     | 0.862          | 0.977        |
| rh_S_temporal_inf            | -0.004      | -0.038, 0.03  | -0.26    | 0.798          | 0.977        |
| rh_S_temporal_sup            | -0.013      | -0.065, 0.038 | -0.51    | 0.613          | 0.977        |
| rh_S_temporal_transverse     | 0.064       | -0.006, 0.133 | 1.83     | 0.071          | 0.791        |

**Bold** denotes group differences at p<0.05 uncorrected



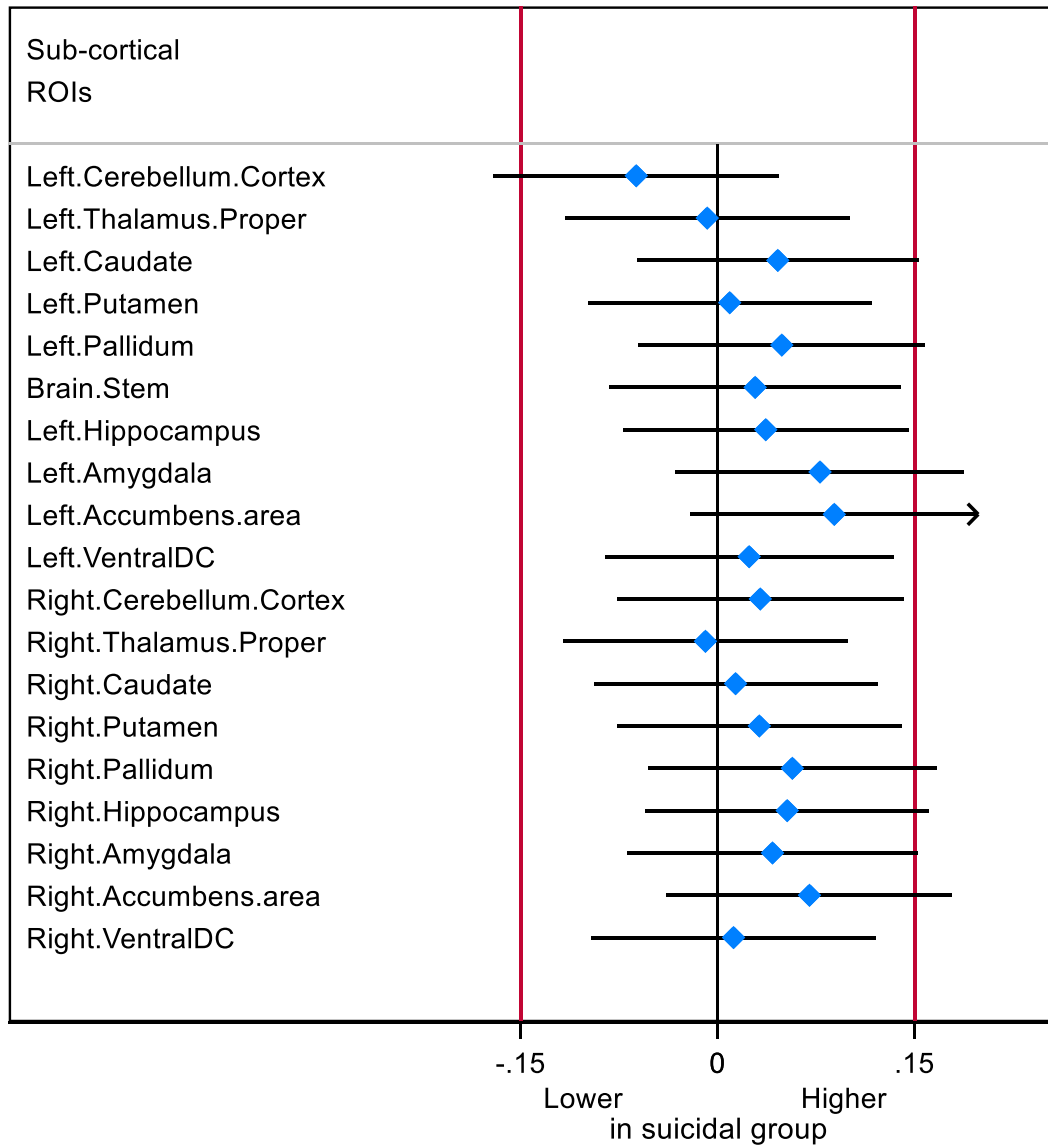

**eFigure 18.** Results of the Equivalence test for differences in functional activity in subcortical regions between the never-suicidal group and the child-reported suicidality group for anticipation of loss. The figure shows the effect sizes and 95% confidence intervals of the difference against the interval of equivalence (-0.15 to 0.15).

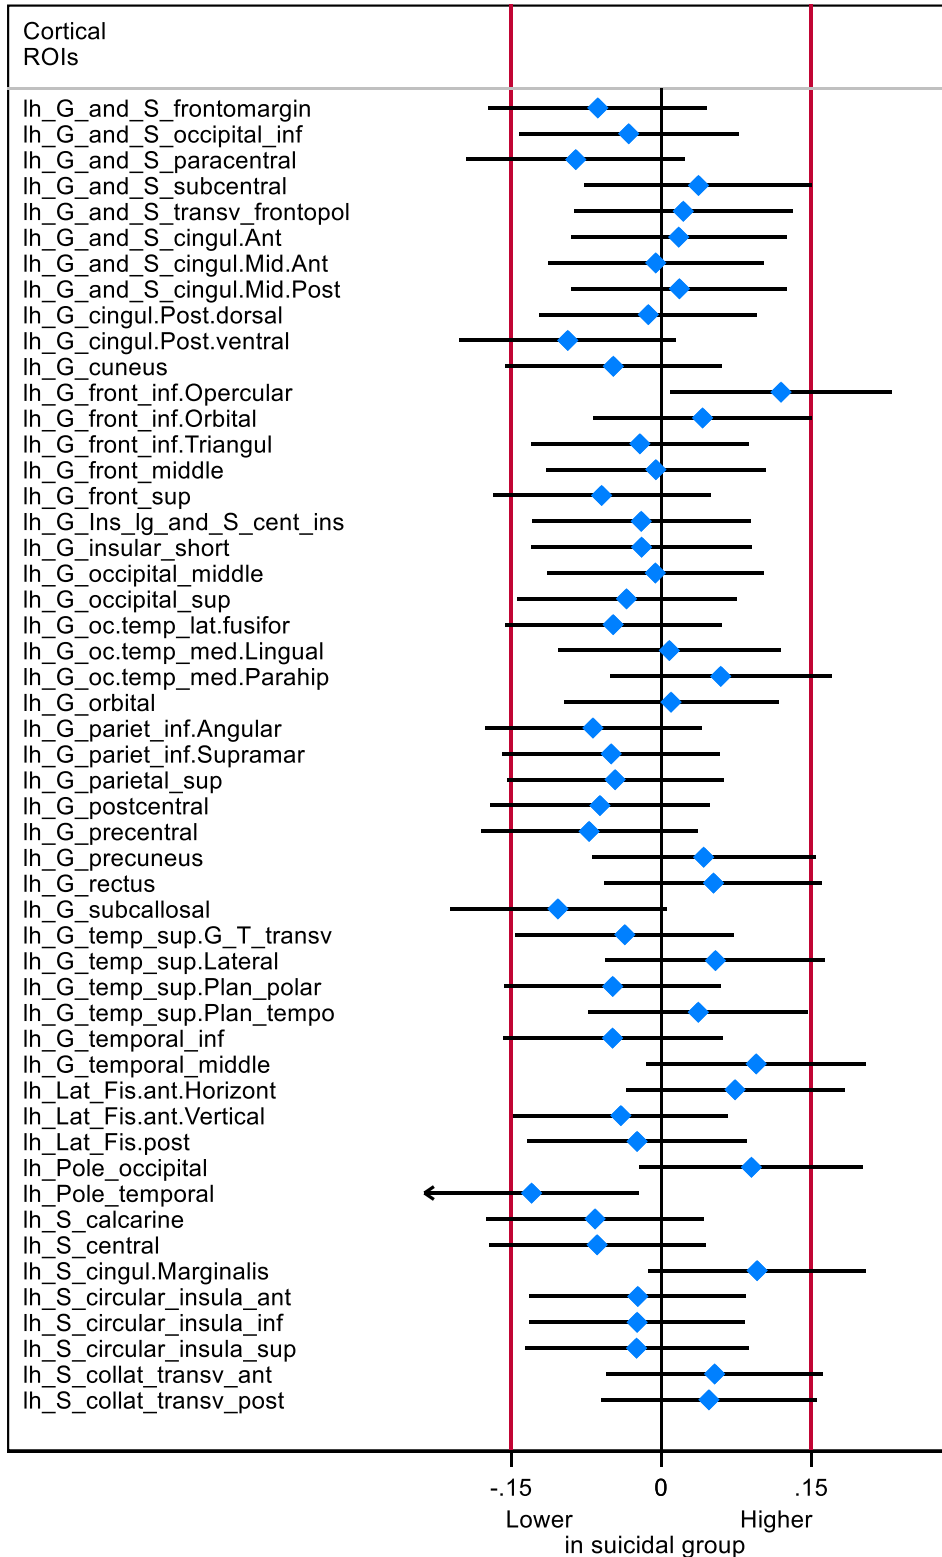

**eFigure 19 (1 of 3).** Results of the Equivalence test for differences in functional activity in cortical regions between the never-suicidal group and the child-reported suicidality group for anticipation of loss. The figure shows the effect sizes and 95% confidence intervals of the difference against the interval of equivalence (-0.15 to 0.15).

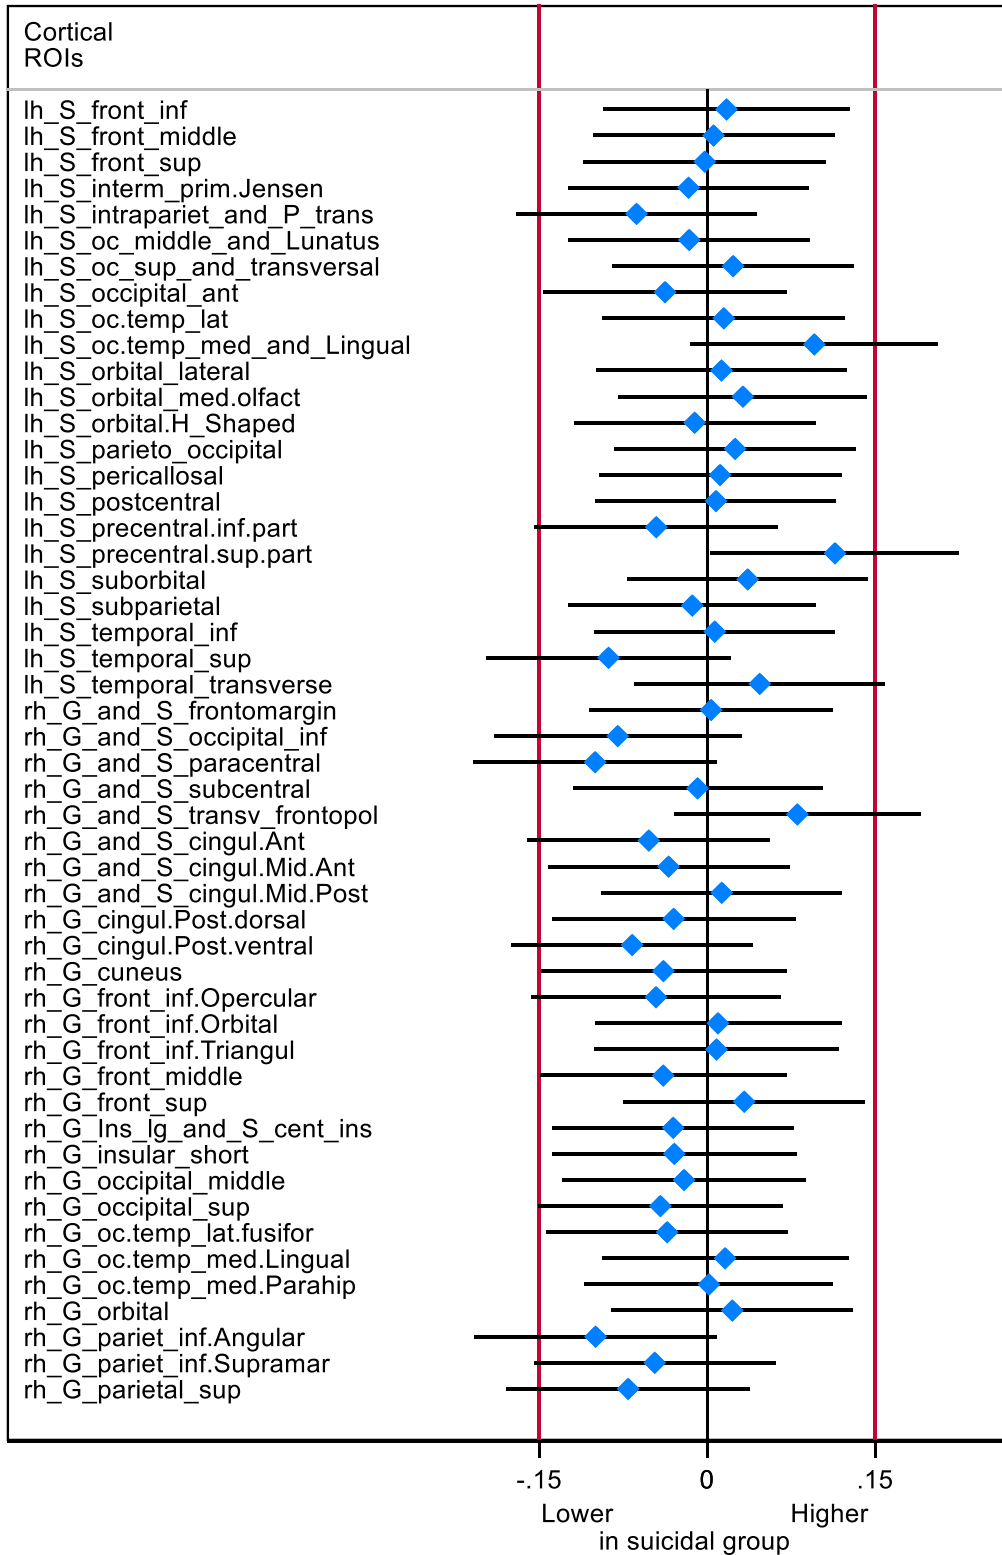

**eFigure 19 (2 of 3).** Results of the Equivalence test for differences in functional activity in cortical regions between the never-suicidal group and the child-reported suicidality group for anticipation of loss. The figure shows the effect sizes and 95% confidence intervals of the difference against the interval of equivalence (-0.15 to 0.15).

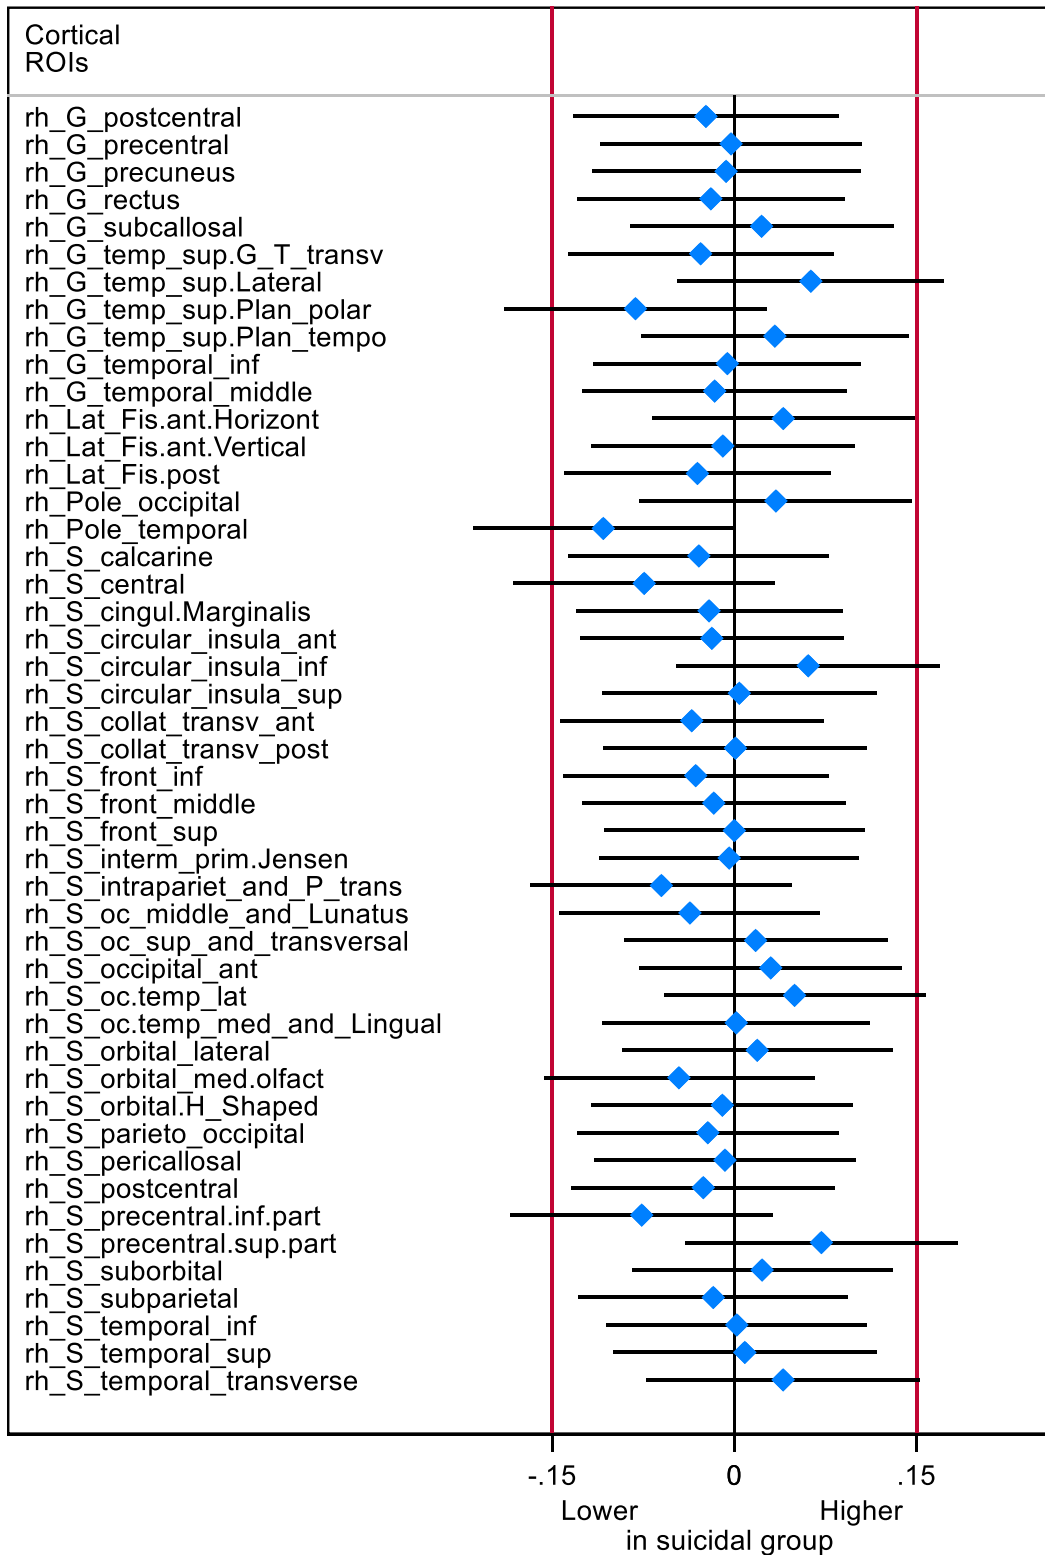

**eFigure 19 (3 of 3).** Results of the Equivalence test for differences in functional activity in cortical regions between the never-suicidal group and the child-reported suicidality group for anticipation of loss. The figure shows the effect sizes and 95% confidence intervals of the difference against the interval of equivalence (-0.15 to 0.15).

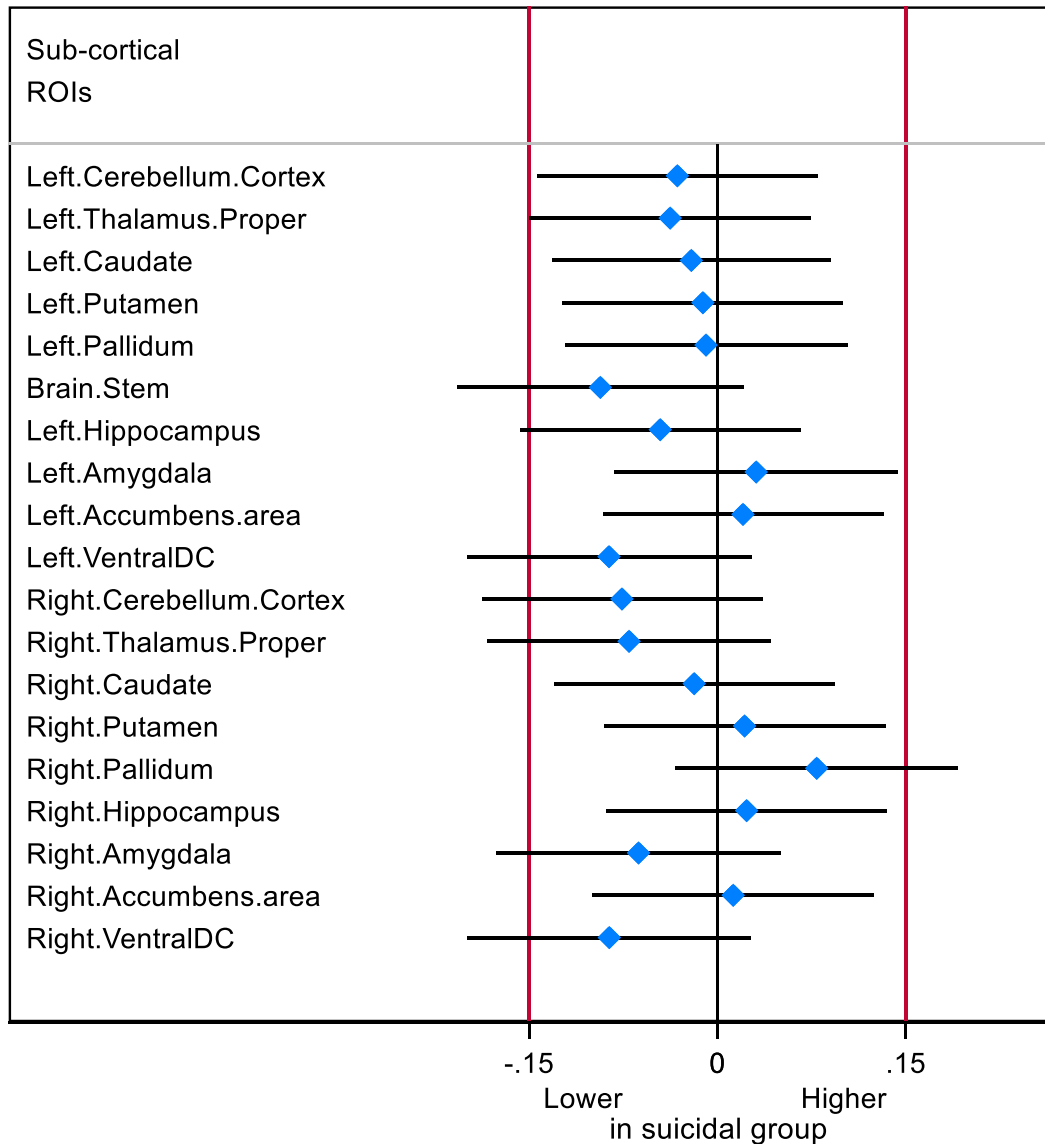

**eFigure 20.** Results of the Equivalence test for differences in functional activity in subcortical regions between the never-suicidal group and the caregiver-reported suicidality group for anticipation of loss. The figure shows the effect sizes and 95% confidence intervals of the difference against the interval of equivalence (-0.15 to 0.15).

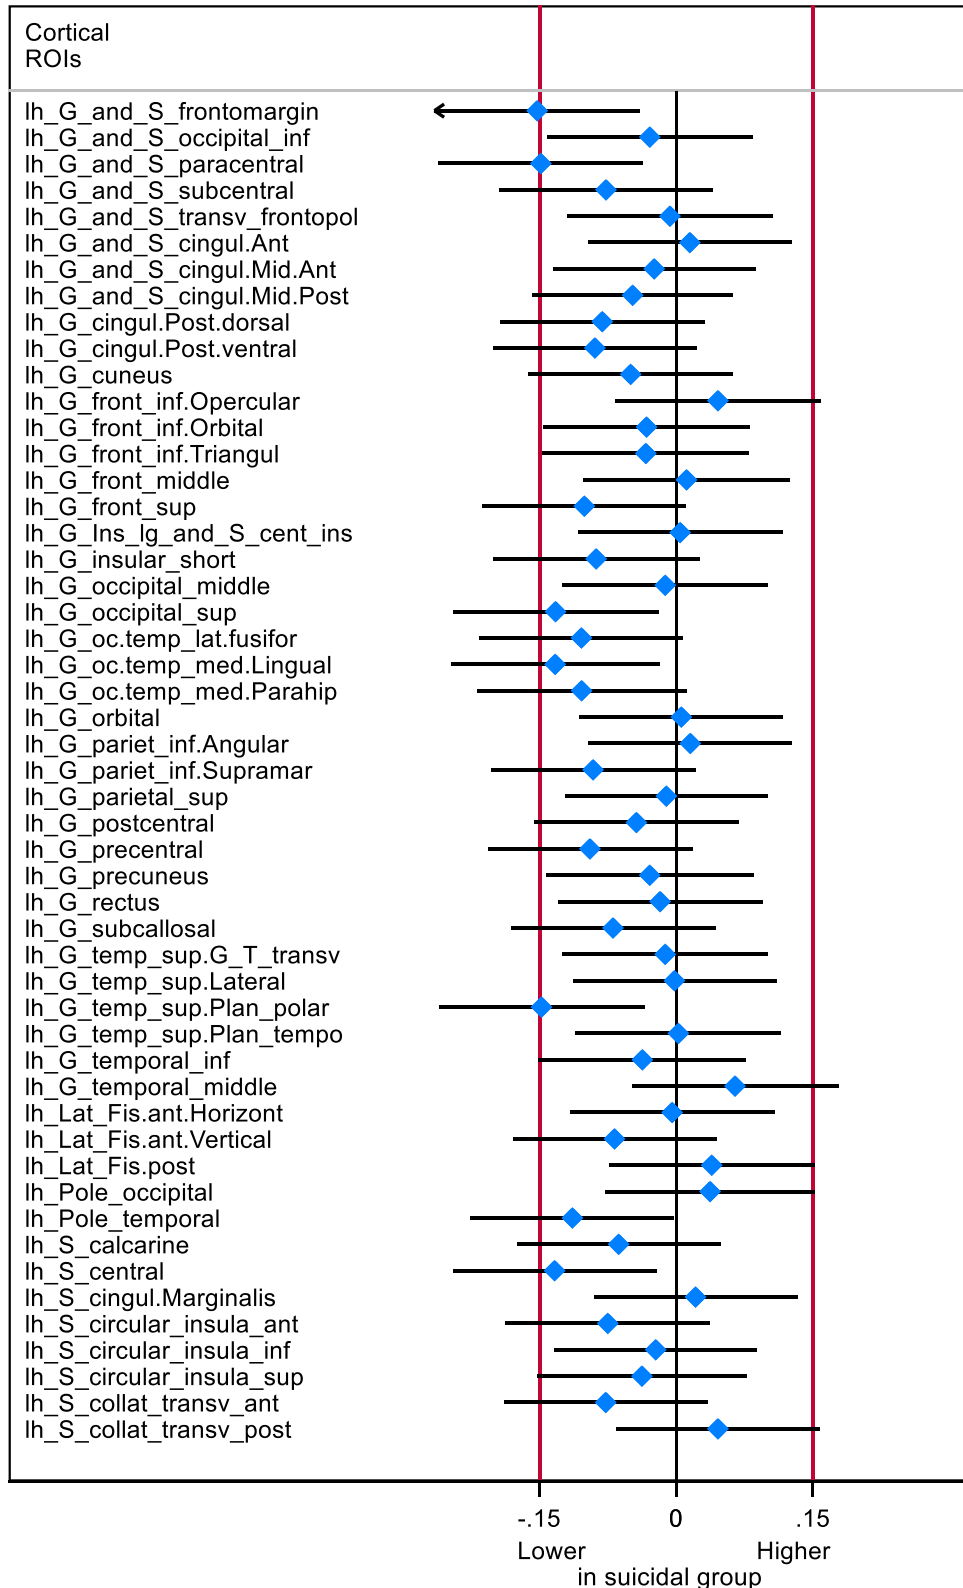

**eFigure 21 (1 of 3).** Results of the Equivalence test for differences in functional activity in cortical regions between the never-suicidal group and the caregiver-reported suicidality group for anticipation of loss. The figure shows the effect sizes and 95% confidence intervals of the difference against the interval of equivalence (-0.15 to 0.15).

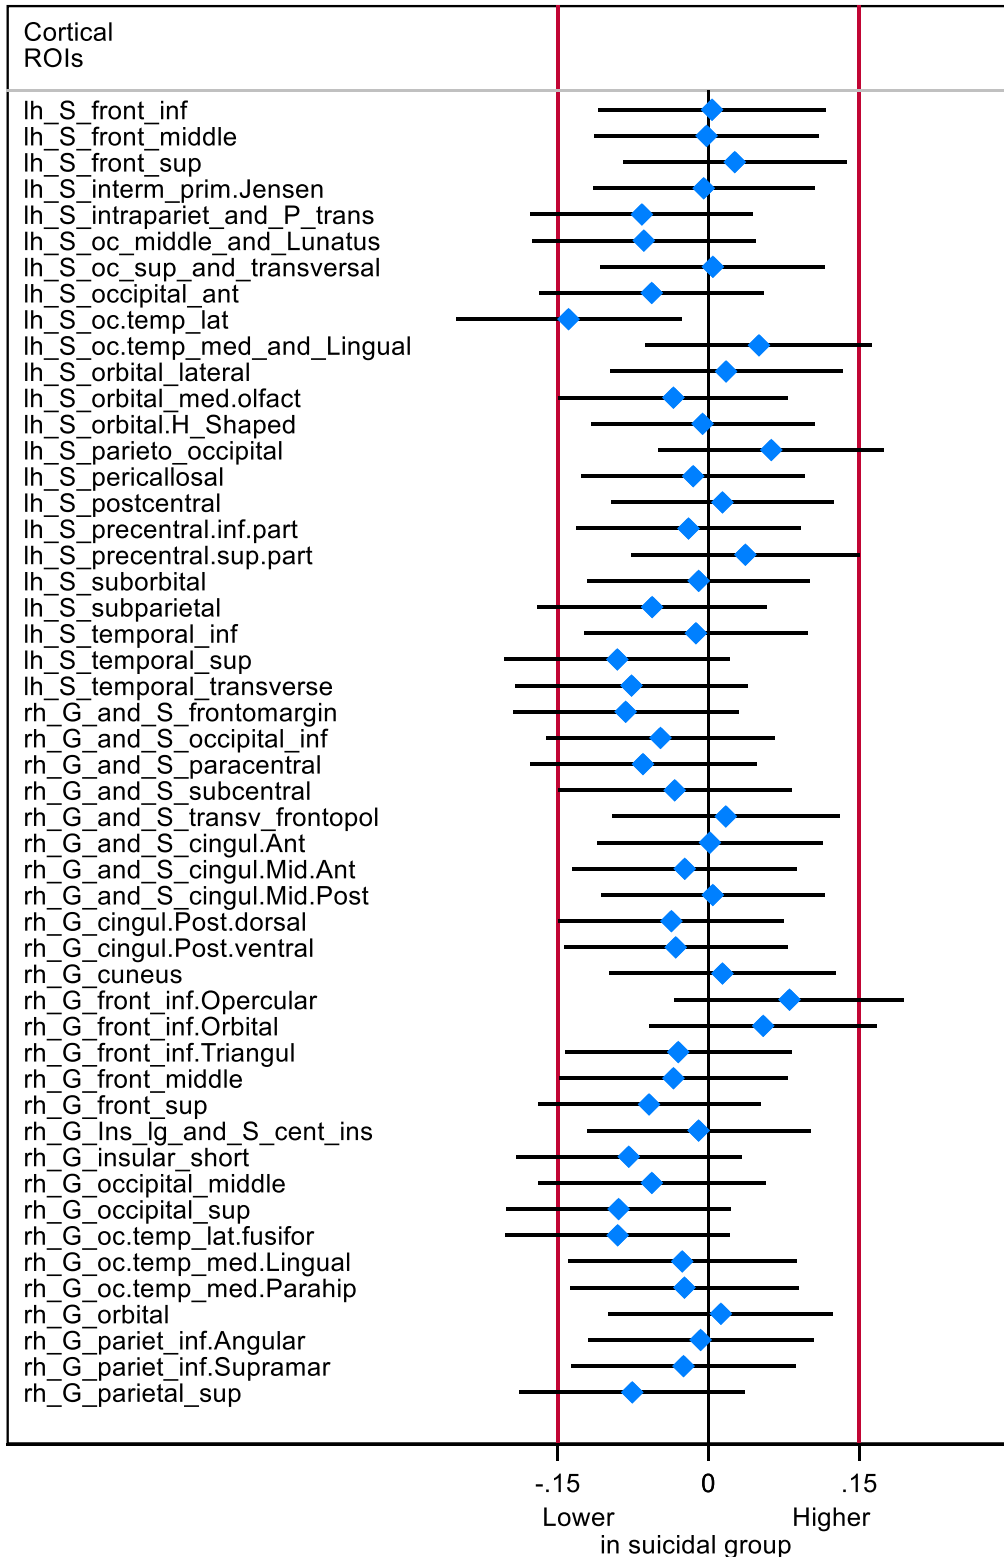

**eFigure 21 (2 of 3).** Results of the Equivalence test for differences in functional activity in cortical regions between the never-suicidal group and the caregiver-reported suicidality group for anticipation of loss. The figure shows the effect sizes and 95% confidence intervals of the difference against the interval of equivalence (-0.15 to 0.15).

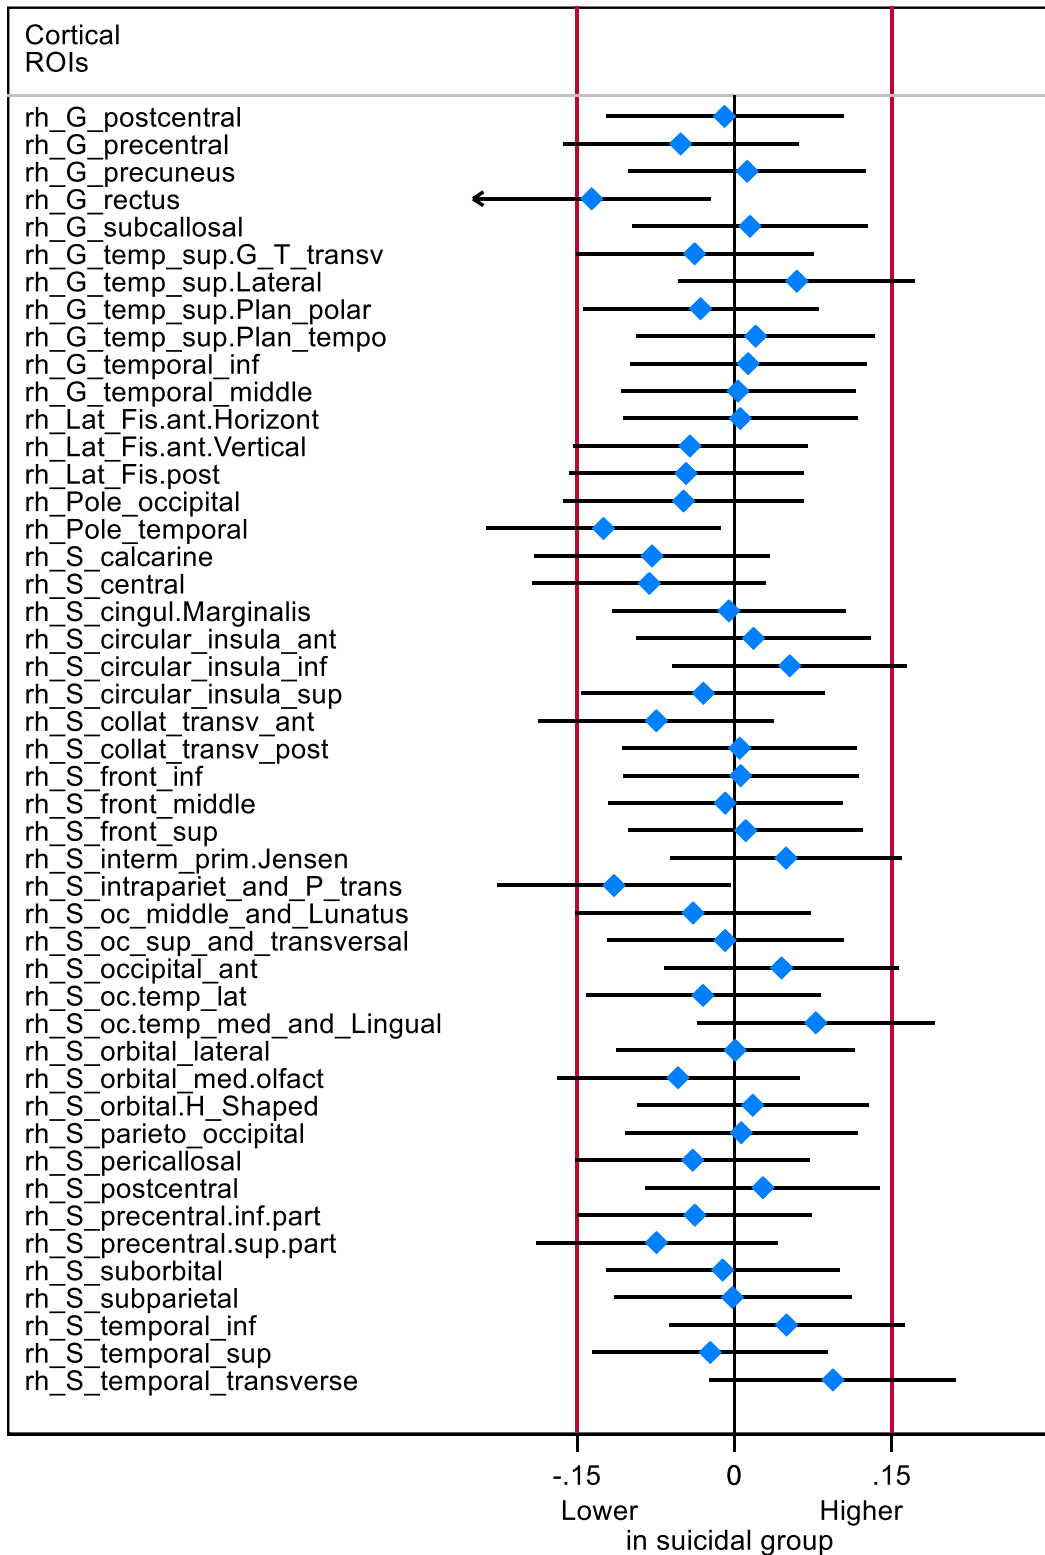

**eFigure 21 (3 of 3).** Results of the Equivalence test for differences in functional activity in cortical regions between the never-suicidal group and the caregiver-reported suicidality group for anticipation of loss. The figure shows the effect sizes and 95% confidence intervals of the difference against the interval of equivalence (-0.15 to 0.15).



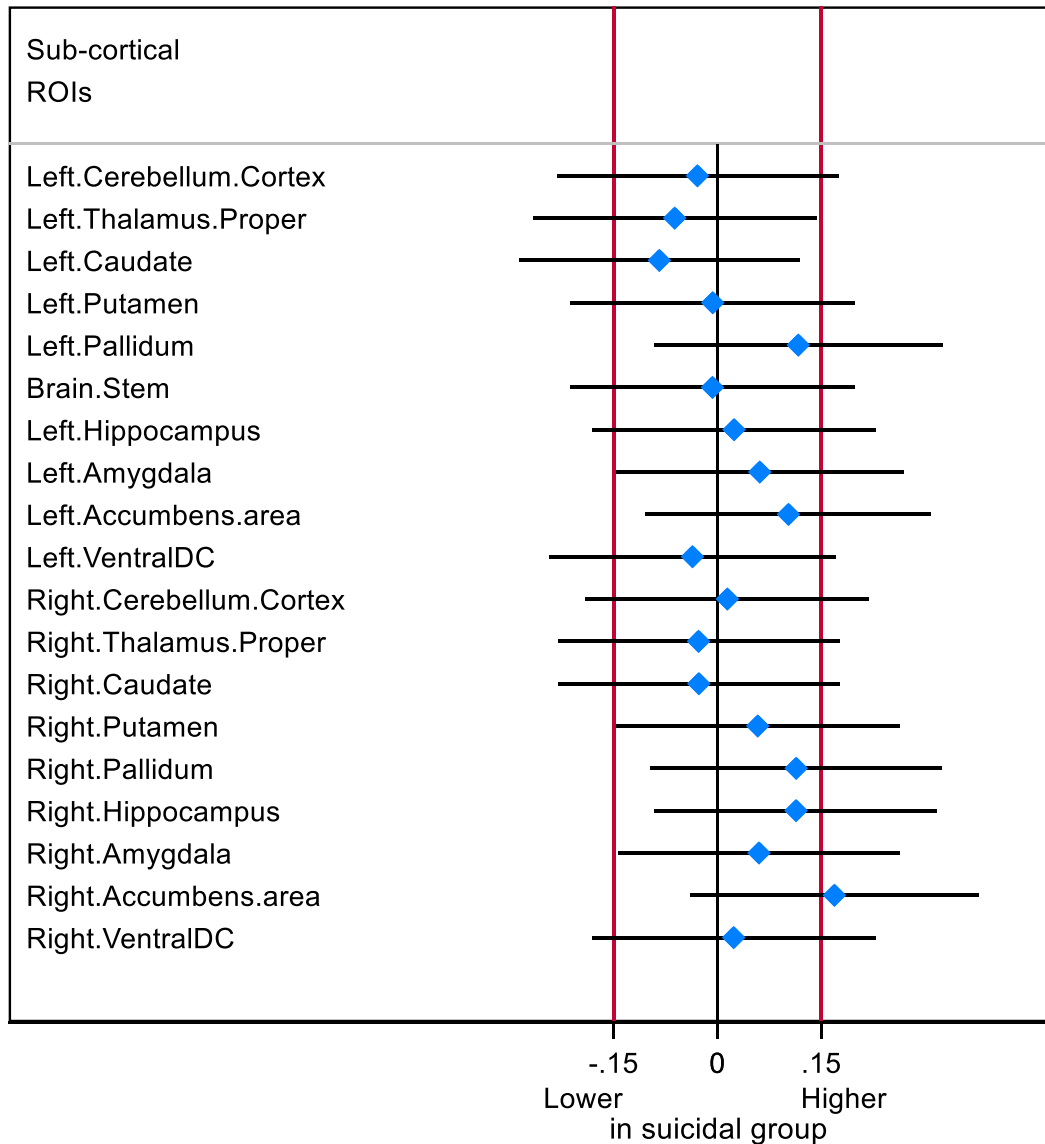

**eFigure 22.** Results of the Equivalence test for differences in functional activity in subcortical regions between the never-suicidal group and the concordantly-reported suicidality group for anticipation of loss. The figure shows the effect sizes and 95% confidence intervals of the difference against the interval of equivalence (-0.15 to 0.15).

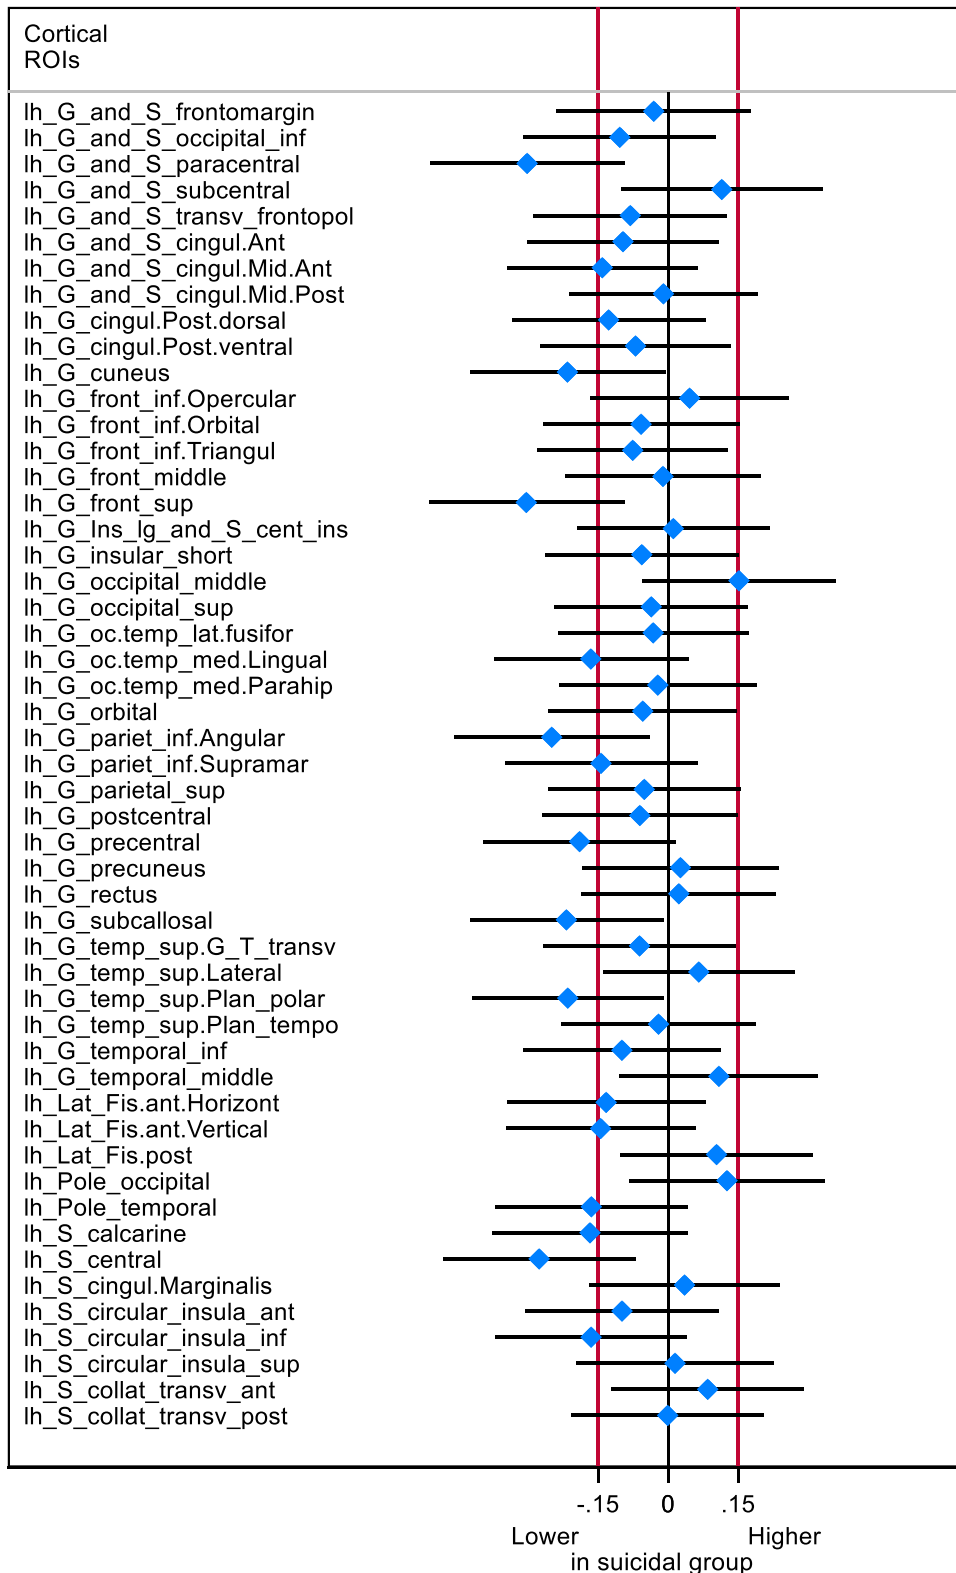

**eFigure 23 (1 of 3).** Results of the Equivalence test for differences in functional activity in cortical regions between the never-suicidal group and the concordantly-reported suicidality group for anticipation of loss. The figure shows the effect sizes and 95% confidence intervals of the difference against the interval of equivalence (-0.15 to 0.15).

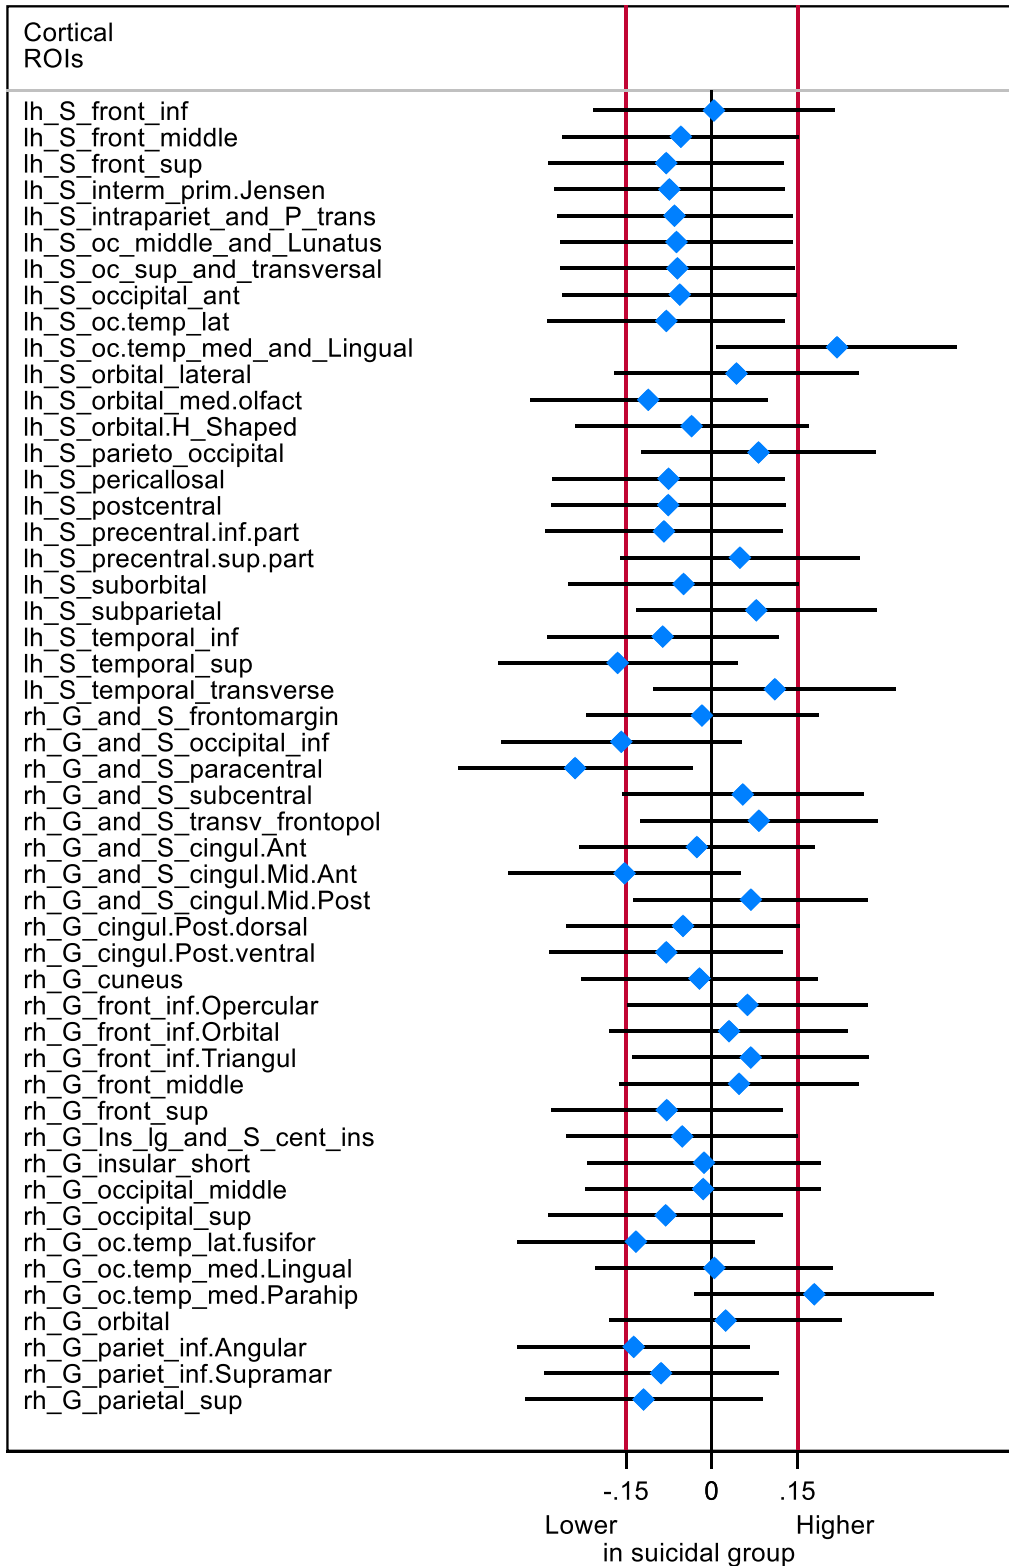

**eFigure 23 (2 of 3).** Results of the Equivalence test for differences in functional activity in cortical regions between the never-suicidal group and the concordantly-reported suicidality group for anticipation of loss. The figure shows the effect sizes and 95% confidence intervals of the difference against the interval of equivalence (-0.15 to 0.15).

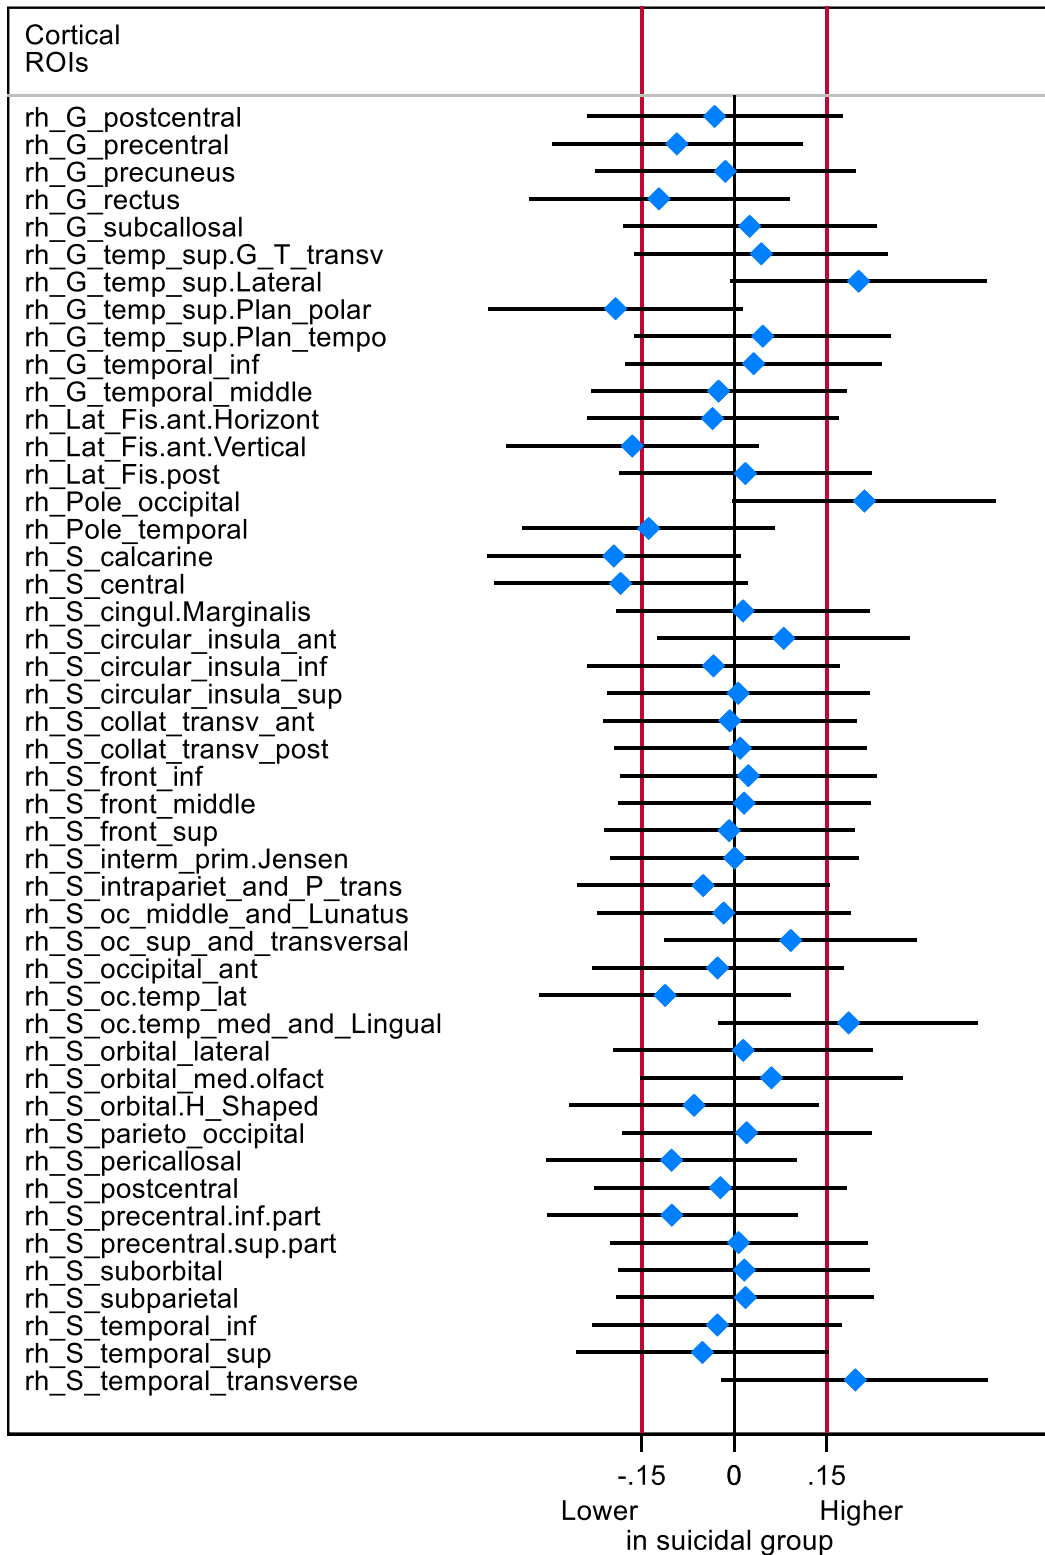

**eFigure 23 (3 of 3).** Results of the Equivalence test for differences in functional activity in cortical regions between the never-suicidal group and the concordantly-reported suicidality group for anticipation of loss. The figure shows the effect sizes and 95% confidence intervals of the difference against the interval of equivalence (-0.15 to 0.15).

Positive vs negative feedback of reward

| <b>eTable 17. Differences in functional activity between the never-suicidal group and the child-reported suicidality group for reward feedback: Welch's t-test</b> |             |                |          |                |              |
|--------------------------------------------------------------------------------------------------------------------------------------------------------------------|-------------|----------------|----------|----------------|--------------|
| <b>ROIs</b>                                                                                                                                                        | <b>Mean</b> | <b>95%CI</b>   | <b>t</b> | <b>p (unc)</b> | <b>p FDR</b> |
| <b>Subcortical regions</b>                                                                                                                                         |             |                |          |                |              |
| Left.Cerebellum.Cortex                                                                                                                                             | -0.011      | -0.042, 0.02   | -0.71    | 0.479          | 0.857        |
| Left.Thalamus.Proper                                                                                                                                               | -0.013      | -0.03, 0.003   | -1.59    | 0.114          | 0.805        |
| Left.Caudate                                                                                                                                                       | -0.013      | -0.036, 0.011  | -1.06    | 0.290          | 0.835        |
| Left.Putamen                                                                                                                                                       | -0.013      | -0.033, 0.007  | -1.31    | 0.190          | 0.805        |
| Left.Pallidum                                                                                                                                                      | 0.003       | -0.014, 0.02   | 0.35     | 0.730          | 0.951        |
| Brain.Stem                                                                                                                                                         | 0.001       | -0.019, 0.021  | 0.08     | 0.934          | 0.981        |
| Left.Hippocampus                                                                                                                                                   | -0.006      | -0.022, 0.01   | -0.70    | 0.487          | 0.857        |
| Left.Amygdala                                                                                                                                                      | -0.014      | -0.035, 0.007  | -1.35    | 0.178          | 0.805        |
| Left.Accumbens.area                                                                                                                                                | -0.011      | -0.037, 0.015  | -0.81    | 0.419          | 0.837        |
| Left.VentralDC                                                                                                                                                     | -0.003      | -0.024, 0.019  | -0.24    | 0.812          | 0.958        |
| Right.Cerebellum.Cortex                                                                                                                                            | -0.025      | -0.055, 0.004  | -1.68    | 0.094          | 0.805        |
| Right.Thalamus.Proper                                                                                                                                              | -0.003      | -0.021, 0.015  | -0.28    | 0.780          | 0.951        |
| Right.Caudate                                                                                                                                                      | -0.007      | -0.031, 0.018  | -0.54    | 0.588          | 0.903        |
| Right.Putamen                                                                                                                                                      | 0.000       | -0.021, 0.02   | -0.01    | 0.994          | 0.994        |
| Right.Pallidum                                                                                                                                                     | 0.003       | -0.014, 0.02   | 0.32     | 0.747          | 0.951        |
| Right.Hippocampus                                                                                                                                                  | -0.008      | -0.025, 0.01   | -0.87    | 0.387          | 0.837        |
| Right.Amygdala                                                                                                                                                     | -0.009      | -0.031, 0.014  | -0.78    | 0.437          | 0.837        |
| Right.Accumbens.area                                                                                                                                               | 0.000       | -0.025, 0.025  | 0.01     | 0.992          | 0.994        |
| Right.VentralDC                                                                                                                                                    | -0.016      | -0.037, 0.005  | -1.52    | 0.129          | 0.805        |
| <b>Cortical regions</b>                                                                                                                                            |             |                |          |                |              |
| lh_G_and_S_frontomargin                                                                                                                                            | -0.001      | -0.046, 0.044  | -0.05    | 0.962          | 0.986        |
| lh_G_and_S_occipital_inf                                                                                                                                           | 0.000       | -0.032, 0.033  | 0.02     | 0.986          | 0.994        |
| lh_G_and_S_paracentral                                                                                                                                             | -0.008      | -0.031, 0.015  | -0.70    | 0.483          | 0.857        |
| lh_G_and_S_subcentral                                                                                                                                              | -0.015      | -0.037, 0.008  | -1.27    | 0.205          | 0.805        |
| lh_G_and_S_transv_frontopol                                                                                                                                        | -0.043      | -0.087, 0      | -1.95    | 0.052          | 0.805        |
| lh_G_and_S_cingul.Ant                                                                                                                                              | -0.018      | -0.04, 0.004   | -1.63    | 0.105          | 0.805        |
| lh_G_and_S_cingul.Mid.Ant                                                                                                                                          | -0.010      | -0.029, 0.01   | -0.99    | 0.324          | 0.837        |
| lh_G_and_S_cingul.Mid.Post                                                                                                                                         | -0.020      | -0.038, -0.001 | -2.11    | <b>0.035</b>   | 0.805        |
| lh_G_cingul.Post.dorsal                                                                                                                                            | -0.008      | -0.029, 0.013  | -0.75    | 0.452          | 0.838        |
| lh_G_cingul.Post.ventral                                                                                                                                           | 0.002       | -0.041, 0.045  | 0.09     | 0.928          | 0.980        |
| lh_G_cuneus                                                                                                                                                        | -0.018      | -0.05, 0.015   | -1.08    | 0.280          | 0.835        |
| lh_G_front_inf.Opercular                                                                                                                                           | -0.017      | -0.038, 0.004  | -1.59    | 0.113          | 0.805        |
| lh_G_front_inf.Orbital                                                                                                                                             | -0.010      | -0.042, 0.023  | -0.58    | 0.559          | 0.899        |
| lh_G_front_inf.Triangul                                                                                                                                            | -0.007      | -0.032, 0.018  | -0.54    | 0.590          | 0.903        |
| lh_G_front_middle                                                                                                                                                  | -0.012      | -0.032, 0.009  | -1.13    | 0.258          | 0.833        |
| lh_G_front_sup                                                                                                                                                     | -0.007      | -0.023, 0.009  | -0.89    | 0.374          | 0.837        |
| lh_G_Ins_lg_and_S_cent_ins                                                                                                                                         | -0.010      | -0.03, 0.01    | -0.95    | 0.342          | 0.837        |
| lh_G_insular_short                                                                                                                                                 | -0.003      | -0.02, 0.014   | -0.31    | 0.753          | 0.951        |

**eTable 17. Differences in functional activity between the never-suicidal group and the child-reported suicidality group for reward feedback: Welch's t-test**

| ROIs                         | Mean   | 95%CI          | t     | p (unc)      | p FDR |
|------------------------------|--------|----------------|-------|--------------|-------|
| lh_G_occipital_middle        | -0.004 | -0.028, 0.019  | -0.38 | 0.706        | 0.951 |
| lh_G_occipital_sup           | -0.017 | -0.042, 0.009  | -1.28 | 0.203        | 0.805 |
| lh_G_oc.temp_lat.fusifor     | -0.021 | -0.049, 0.007  | -1.47 | 0.144        | 0.805 |
| lh_G_oc.temp_med.Lingual     | -0.023 | -0.059, 0.013  | -1.25 | 0.212        | 0.805 |
| lh_G_oc.temp_med.Parahip     | -0.008 | -0.034, 0.017  | -0.64 | 0.519        | 0.885 |
| lh_G_orbital                 | -0.016 | -0.054, 0.023  | -0.80 | 0.424        | 0.837 |
| lh_G_pariet_inf.Angular      | -0.006 | -0.027, 0.014  | -0.61 | 0.543        | 0.899 |
| lh_G_pariet_inf.Supramar     | -0.019 | -0.037, -0.001 | -2.07 | <b>0.039</b> | 0.805 |
| lh_G_parietal_sup            | -0.011 | -0.031, 0.01   | -1.05 | 0.295        | 0.836 |
| lh_G_postcentral             | -0.021 | -0.044, 0.003  | -1.71 | 0.088        | 0.805 |
| lh_G_precentral              | -0.015 | -0.032, 0.002  | -1.76 | 0.079        | 0.805 |
| lh_G_precuneus               | -0.014 | -0.034, 0.007  | -1.34 | 0.181        | 0.805 |
| lh_G_rectus                  | -0.005 | -0.075, 0.066  | -0.13 | 0.899        | 0.968 |
| lh_G_subcallosal             | -0.024 | -0.061, 0.012  | -1.31 | 0.189        | 0.805 |
| lh_G_temp_sup.G_T_transv     | -0.003 | -0.025, 0.019  | -0.28 | 0.778        | 0.951 |
| lh_G_temp_sup.Lateral        | -0.013 | -0.03, 0.005   | -1.40 | 0.164        | 0.805 |
| lh_G_temp_sup.Plan_polar     | -0.015 | -0.032, 0.002  | -1.70 | 0.090        | 0.805 |
| lh_G_temp_sup.Plan_tempo     | -0.015 | -0.036, 0.006  | -1.39 | 0.164        | 0.805 |
| lh_G_temporal_inf            | 0.003  | -0.031, 0.036  | 0.16  | 0.874        | 0.966 |
| lh_G_temporal_middle         | -0.005 | -0.03, 0.019   | -0.41 | 0.685        | 0.951 |
| lh_Lat_Fis.ant.Horizontal    | -0.018 | -0.046, 0.01   | -1.25 | 0.212        | 0.805 |
| lh_Lat_Fis.ant.Vertical      | -0.008 | -0.039, 0.024  | -0.48 | 0.629        | 0.936 |
| lh_Lat_Fis.post              | -0.016 | -0.04, 0.008   | -1.30 | 0.194        | 0.805 |
| lh_Pole_occipital            | -0.026 | -0.068, 0.017  | -1.18 | 0.237        | 0.826 |
| lh_Pole_temporal             | -0.020 | -0.051, 0.011  | -1.29 | 0.198        | 0.805 |
| lh_S_calcarine               | -0.005 | -0.036, 0.026  | -0.30 | 0.761        | 0.951 |
| lh_S_central                 | -0.022 | -0.048, 0.003  | -1.72 | 0.086        | 0.805 |
| lh_S_cingul.Marginalis       | -0.013 | -0.032, 0.006  | -1.34 | 0.182        | 0.805 |
| lh_S_circular_insula_ant     | -0.010 | -0.032, 0.013  | -0.86 | 0.393        | 0.837 |
| lh_S_circular_insula_inf     | -0.005 | -0.024, 0.014  | -0.48 | 0.633        | 0.936 |
| lh_S_circular_insula_sup     | -0.017 | -0.036, 0.002  | -1.80 | 0.073        | 0.805 |
| lh_S_collat_transv_ant       | -0.010 | -0.042, 0.022  | -0.61 | 0.539        | 0.899 |
| lh_S_collat_transv_post      | -0.014 | -0.044, 0.016  | -0.91 | 0.362        | 0.837 |
| lh_S_front_inf               | -0.012 | -0.035, 0.012  | -0.97 | 0.334        | 0.837 |
| lh_S_front_middle            | -0.014 | -0.038, 0.01   | -1.13 | 0.260        | 0.833 |
| lh_S_front_sup               | -0.004 | -0.022, 0.014  | -0.46 | 0.646        | 0.946 |
| lh_S_interm_prim.Jensen      | -0.024 | -0.048, 0.001  | -1.92 | 0.055        | 0.805 |
| lh_S_intrapariet_and_P_trans | -0.008 | -0.029, 0.012  | -0.79 | 0.432        | 0.837 |
| lh_S_oc_middle_and_Lunatus   | -0.018 | -0.048, 0.012  | -1.17 | 0.242        | 0.826 |
| lh_S_oc_sup_and_transversal  | -0.005 | -0.028, 0.018  | -0.43 | 0.670        | 0.951 |
| lh_S_occipital_ant           | -0.002 | -0.022, 0.019  | -0.16 | 0.870        | 0.966 |
| lh_S_oc.temp_lat             | -0.007 | -0.028, 0.015  | -0.61 | 0.545        | 0.899 |
| lh_S_oc.temp_med_and_Lingual | -0.013 | -0.033, 0.007  | -1.28 | 0.202        | 0.805 |

**eTable 17. Differences in functional activity between the never-suicidal group and the child-reported suicidality group for reward feedback: Welch's t-test**

| ROIs                        | Mean   | 95%CI         | t     | p (unc)      | p FDR |
|-----------------------------|--------|---------------|-------|--------------|-------|
| lh_S_orbital_lateral        | 0.004  | -0.033, 0.041 | 0.20  | 0.845        | 0.960 |
| lh_S_orbital_med.olfact     | -0.007 | -0.067, 0.053 | -0.24 | 0.813        | 0.958 |
| lh_S_orbital.H_Shaped       | -0.009 | -0.038, 0.019 | -0.65 | 0.517        | 0.885 |
| lh_S_parieto_occipital      | -0.012 | -0.033, 0.009 | -1.11 | 0.269        | 0.833 |
| lh_S_pericallosal           | -0.004 | -0.028, 0.021 | -0.29 | 0.775        | 0.951 |
| lh_S_postcentral            | -0.012 | -0.031, 0.007 | -1.26 | 0.209        | 0.805 |
| lh_S_precentral.inf.part    | -0.004 | -0.026, 0.018 | -0.35 | 0.726        | 0.951 |
| lh_S_precentral.sup.part    | 0.000  | -0.019, 0.018 | -0.04 | 0.970        | 0.988 |
| lh_S_suborbital             | -0.009 | -0.055, 0.037 | -0.37 | 0.710        | 0.951 |
| lh_S_subparietal            | -0.018 | -0.042, 0.005 | -1.52 | 0.129        | 0.805 |
| lh_S_temporal_inf           | -0.013 | -0.046, 0.021 | -0.74 | 0.457        | 0.839 |
| lh_S_temporal_sup           | -0.005 | -0.023, 0.013 | -0.53 | 0.597        | 0.907 |
| lh_S_temporal_transverse    | 0.002  | -0.028, 0.032 | 0.15  | 0.880        | 0.966 |
| rh_G_and_S_frontomargin     | -0.051 | -0.1, -0.002  | -2.03 | <b>0.043</b> | 0.805 |
| rh_G_and_S_occipital_inf    | -0.028 | -0.06, 0.003  | -1.77 | 0.078        | 0.805 |
| rh_G_and_S_paracentral      | -0.014 | -0.038, 0.009 | -1.18 | 0.237        | 0.826 |
| rh_G_and_S_subcentral       | -0.012 | -0.035, 0.011 | -1.04 | 0.300        | 0.836 |
| rh_G_and_S_transv_frontopol | -0.007 | -0.045, 0.031 | -0.38 | 0.704        | 0.951 |
| rh_G_and_S_cingul.Ant       | -0.009 | -0.032, 0.014 | -0.76 | 0.446        | 0.837 |
| rh_G_and_S_cingul.Mid.Ant   | -0.006 | -0.024, 0.013 | -0.60 | 0.552        | 0.899 |
| rh_G_and_S_cingul.Mid.Post  | -0.010 | -0.028, 0.007 | -1.14 | 0.256        | 0.833 |
| rh_G_cingul.Post.dorsal     | -0.003 | -0.024, 0.019 | -0.25 | 0.802        | 0.958 |
| rh_G_cingul.Post.ventral    | -0.004 | -0.038, 0.031 | -0.21 | 0.836        | 0.958 |
| rh_G_cuneus                 | -0.022 | -0.053, 0.009 | -1.37 | 0.172        | 0.805 |
| rh_G_front_inf.Opercular    | -0.008 | -0.03, 0.013  | -0.77 | 0.442        | 0.837 |
| rh_G_front_inf.Orbital      | 0.001  | -0.032, 0.034 | 0.05  | 0.962        | 0.986 |
| rh_G_front_inf.Triangul     | -0.003 | -0.027, 0.022 | -0.22 | 0.830        | 0.958 |
| rh_G_front_middle           | -0.010 | -0.032, 0.012 | -0.89 | 0.374        | 0.837 |
| rh_G_front_sup              | -0.009 | -0.025, 0.007 | -1.11 | 0.266        | 0.833 |
| rh_G_Ins_lg_and_S_cent_ins  | -0.010 | -0.031, 0.011 | -0.91 | 0.362        | 0.837 |
| rh_G_insular_short          | -0.004 | -0.022, 0.015 | -0.39 | 0.696        | 0.951 |
| rh_G_occipital_middle       | -0.015 | -0.038, 0.007 | -1.35 | 0.179        | 0.805 |
| rh_G_occipital_sup          | -0.024 | -0.049, 0.001 | -1.86 | 0.064        | 0.805 |
| rh_G_oc.temp_lat.fusifor    | -0.002 | -0.03, 0.027  | -0.12 | 0.905        | 0.969 |
| rh_G_oc.temp_med.Lingual    | -0.004 | -0.038, 0.031 | -0.20 | 0.838        | 0.958 |
| rh_G_oc.temp_med.Parahip    | -0.005 | -0.031, 0.022 | -0.34 | 0.734        | 0.951 |
| rh_G_orbital                | -0.029 | -0.067, 0.01  | -1.48 | 0.141        | 0.805 |
| rh_G_pariet_inf.Angular     | -0.009 | -0.03, 0.011  | -0.89 | 0.373        | 0.837 |
| rh_G_pariet_inf.Supramar    | -0.002 | -0.021, 0.016 | -0.25 | 0.805        | 0.958 |
| rh_G_parietal_sup           | -0.009 | -0.029, 0.01  | -0.95 | 0.342        | 0.837 |
| rh_G_postcentral            | -0.011 | -0.033, 0.011 | -0.96 | 0.337        | 0.837 |
| rh_G_precentral             | -0.007 | -0.023, 0.01  | -0.78 | 0.438        | 0.837 |
| rh_G_precuneus              | -0.009 | -0.03, 0.012  | -0.86 | 0.389        | 0.837 |

**eTable 17. Differences in functional activity between the never-suicidal group and the child-reported suicidality group for reward feedback: Welch's t-test**

| ROIs                         | Mean   | 95%CI          | t     | p (unc)      | p FDR |
|------------------------------|--------|----------------|-------|--------------|-------|
| rh_G_rectus                  | 0.029  | -0.056, 0.114  | 0.67  | 0.503        | 0.875 |
| rh_G_subcallosal             | 0.016  | -0.022, 0.053  | 0.82  | 0.411        | 0.837 |
| rh_G_temp_sup.G_T_transv     | -0.018 | -0.041, 0.005  | -1.57 | 0.117        | 0.805 |
| rh_G_temp_sup.Lateral        | -0.005 | -0.023, 0.013  | -0.54 | 0.587        | 0.903 |
| rh_G_temp_sup.Plan_polar     | 0.003  | -0.013, 0.02   | 0.37  | 0.710        | 0.951 |
| rh_G_temp_sup.Plan_tempo     | -0.006 | -0.027, 0.015  | -0.58 | 0.560        | 0.899 |
| rh_G_temporal_inf            | 0.022  | -0.015, 0.059  | 1.18  | 0.238        | 0.826 |
| rh_G_temporal_middle         | -0.012 | -0.034, 0.01   | -1.06 | 0.290        | 0.835 |
| rh_Lat_Fis.ant.Horizontal    | -0.019 | -0.046, 0.008  | -1.35 | 0.177        | 0.805 |
| rh_Lat_Fis.ant.Vertical      | -0.003 | -0.038, 0.032  | -0.14 | 0.887        | 0.967 |
| rh_Lat_Fis.post              | -0.015 | -0.039, 0.009  | -1.26 | 0.208        | 0.805 |
| rh_Pole_occipital            | -0.036 | -0.076, 0.003  | -1.81 | 0.071        | 0.805 |
| rh_Pole_temporal             | -0.003 | -0.038, 0.031  | -0.18 | 0.856        | 0.966 |
| rh_S_calcarine               | -0.003 | -0.035, 0.03   | -0.16 | 0.876        | 0.966 |
| rh_S_central                 | -0.016 | -0.041, 0.009  | -1.26 | 0.207        | 0.805 |
| rh_S_cingul.Marginalis       | -0.008 | -0.027, 0.012  | -0.79 | 0.433        | 0.837 |
| rh_S_circular_insula_ant     | 0.002  | -0.02, 0.023   | 0.14  | 0.891        | 0.967 |
| rh_S_circular_insula_inf     | -0.002 | -0.022, 0.017  | -0.23 | 0.816        | 0.958 |
| rh_S_circular_insula_sup     | -0.013 | -0.034, 0.008  | -1.23 | 0.221        | 0.818 |
| rh_S_collat_transv_ant       | -0.016 | -0.051, 0.018  | -0.94 | 0.347        | 0.837 |
| rh_S_collat_transv_post      | -0.013 | -0.041, 0.015  | -0.90 | 0.366        | 0.837 |
| rh_S_front_inf               | 0.003  | -0.023, 0.028  | 0.20  | 0.838        | 0.958 |
| rh_S_front_middle            | -0.011 | -0.035, 0.014  | -0.84 | 0.401        | 0.837 |
| rh_S_front_sup               | -0.004 | -0.021, 0.014  | -0.44 | 0.662        | 0.951 |
| rh_S_interm_prim.Jensen      | 0.001  | -0.022, 0.025  | 0.10  | 0.917        | 0.975 |
| rh_S_intrapariet_and_P_trans | -0.001 | -0.021, 0.02   | -0.07 | 0.941        | 0.981 |
| rh_S_oc_middle_and_Lunatus   | -0.015 | -0.042, 0.012  | -1.08 | 0.283        | 0.835 |
| rh_S_oc_sup_and_transversal  | -0.004 | -0.027, 0.019  | -0.35 | 0.727        | 0.951 |
| rh_S_occipital_ant           | -0.005 | -0.026, 0.016  | -0.49 | 0.623        | 0.936 |
| rh_S_oc.temp_lat             | -0.004 | -0.025, 0.016  | -0.40 | 0.692        | 0.951 |
| rh_S_oc.temp_med_and_Lingual | -0.007 | -0.026, 0.012  | -0.71 | 0.477        | 0.857 |
| rh_S_orbital_lateral         | 0.013  | -0.019, 0.046  | 0.81  | 0.420        | 0.837 |
| rh_S_orbital_med.olfact      | -0.025 | -0.085, 0.036  | -0.81 | 0.419        | 0.837 |
| rh_S_orbital.H_Shaped        | 0.004  | -0.023, 0.031  | 0.29  | 0.768        | 0.951 |
| rh_S_parieto_occipital       | -0.011 | -0.032, 0.011  | -0.97 | 0.332        | 0.837 |
| rh_S_pericallosal            | 0.001  | -0.028, 0.03   | 0.07  | 0.946        | 0.981 |
| rh_S_postcentral             | -0.012 | -0.03, 0.006   | -1.36 | 0.176        | 0.805 |
| rh_S_precentral.inf.part     | 0.004  | -0.019, 0.027  | 0.32  | 0.748        | 0.951 |
| rh_S_precentral.sup.part     | -0.003 | -0.021, 0.015  | -0.30 | 0.766        | 0.951 |
| rh_S_suborbital              | -0.019 | -0.088, 0.049  | -0.56 | 0.575        | 0.903 |
| rh_S_subparietal             | -0.007 | -0.03, 0.016   | -0.56 | 0.575        | 0.903 |
| rh_S_temporal_inf            | -0.039 | -0.074, -0.005 | -2.26 | <b>0.025</b> | 0.805 |
| rh_S_temporal_sup            | -0.004 | -0.021, 0.014  | -0.41 | 0.684        | 0.951 |



**eTable 17. Differences in functional activity between the never-suicidal group and the child-reported suicidality group for reward feedback: Welch's t-test**

| ROIs                     | Mean   | 95%CI         | t     | p (unc) | p FDR |
|--------------------------|--------|---------------|-------|---------|-------|
| rh_S_temporal_transverse | -0.014 | -0.045, 0.016 | -0.92 | 0.359   | 0.837 |

**Bold** denotes group differences at p<0.05 uncorrected

**eTable 18. Differences in functional activity between the never-suicidal group and the caregiver-reported suicidality group for reward feedback: Welch's t-test**

| ROIs                        | Mean   | 95%CI         | t     | p (unc) | p FDR |
|-----------------------------|--------|---------------|-------|---------|-------|
| <b>Subcortical regions</b>  |        |               |       |         |       |
| Left.Cerebellum.Cortex      | 0.017  | -0.014, 0.049 | 1.09  | 0.275   | 0.935 |
| Left.Thalamus.Proper        | 0.001  | -0.017, 0.019 | 0.13  | 0.899   | 0.956 |
| Left.Caudate                | -0.008 | -0.031, 0.015 | -0.67 | 0.503   | 0.943 |
| Left.Putamen                | -0.009 | -0.032, 0.013 | -0.82 | 0.412   | 0.935 |
| Left.Pallidum               | 0.003  | -0.015, 0.022 | 0.38  | 0.707   | 0.956 |
| Brain.Stem                  | -0.002 | -0.022, 0.019 | -0.16 | 0.872   | 0.956 |
| Left.Hippocampus            | 0.015  | -0.003, 0.032 | 1.66  | 0.098   | 0.854 |
| Left.Amygdala               | 0.000  | -0.02, 0.021  | 0.04  | 0.967   | 0.978 |
| Left.Accumbens.area         | 0.010  | -0.016, 0.036 | 0.73  | 0.464   | 0.935 |
| Left.VentralDC              | 0.007  | -0.015, 0.029 | 0.65  | 0.514   | 0.943 |
| Right.Cerebellum.Cortex     | -0.002 | -0.036, 0.031 | -0.15 | 0.883   | 0.956 |
| Right.Thalamus.Proper       | -0.005 | -0.024, 0.014 | -0.53 | 0.594   | 0.946 |
| Right.Caudate               | -0.009 | -0.034, 0.016 | -0.72 | 0.470   | 0.935 |
| Right.Putamen               | -0.001 | -0.023, 0.02  | -0.13 | 0.900   | 0.956 |
| Right.Pallidum              | 0.007  | -0.011, 0.025 | 0.76  | 0.450   | 0.935 |
| Right.Hippocampus           | 0.006  | -0.011, 0.024 | 0.69  | 0.492   | 0.935 |
| Right.Amygdala              | 0.014  | -0.009, 0.038 | 1.21  | 0.227   | 0.935 |
| Right.Accumbens.area        | 0.018  | -0.006, 0.043 | 1.46  | 0.146   | 0.924 |
| Right.VentralDC             | 0.019  | -0.003, 0.04  | 1.72  | 0.086   | 0.854 |
| <b>Cortical regions</b>     |        |               |       |         |       |
| lh_G_and_S_frontomargin     | 0.017  | -0.03, 0.064  | 0.71  | 0.479   | 0.935 |
| lh_G_and_S_occipital_inf    | -0.002 | -0.033, 0.03  | -0.11 | 0.916   | 0.956 |
| lh_G_and_S_paracentral      | -0.004 | -0.028, 0.02  | -0.32 | 0.747   | 0.956 |
| lh_G_and_S_subcentral       | -0.021 | -0.045, 0.004 | -1.68 | 0.094   | 0.854 |
| lh_G_and_S_transv_frontopol | -0.014 | -0.06, 0.032  | -0.61 | 0.540   | 0.946 |
| lh_G_and_S_cingul.Ant       | 0.013  | -0.009, 0.036 | 1.15  | 0.252   | 0.935 |
| lh_G_and_S_cingul.Mid.Ant   | -0.014 | -0.034, 0.007 | -1.29 | 0.198   | 0.935 |
| lh_G_and_S_cingul.Mid.Post  | -0.018 | -0.038, 0.002 | -1.74 | 0.082   | 0.854 |
| lh_G_cingul.Post.dorsal     | 0.006  | -0.016, 0.028 | 0.50  | 0.618   | 0.946 |
| lh_G_cingul.Post.ventral    | 0.007  | -0.038, 0.052 | 0.30  | 0.764   | 0.956 |

**eTable 18. Differences in functional activity between the never-suicidal group and the caregiver-reported suicidality group for reward feedback: Welch's t-test**

| ROIs                       | Mean   | 95%CI          | t     | p (unc)      | p FDR |
|----------------------------|--------|----------------|-------|--------------|-------|
| lh_G_cuneus                | -0.012 | -0.045, 0.021  | -0.74 | 0.460        | 0.935 |
| lh_G_front_inf.Opercular   | -0.012 | -0.034, 0.009  | -1.14 | 0.256        | 0.935 |
| lh_G_front_inf.Orbital     | -0.010 | -0.042, 0.022  | -0.62 | 0.535        | 0.946 |
| lh_G_front_inf.Triangul    | -0.002 | -0.029, 0.025  | -0.16 | 0.876        | 0.956 |
| lh_G_front_middle          | 0.007  | -0.015, 0.03   | 0.66  | 0.512        | 0.943 |
| lh_G_front_sup             | -0.005 | -0.022, 0.011  | -0.63 | 0.527        | 0.946 |
| lh_G_Ins_lg_and_S_cent_ins | -0.002 | -0.023, 0.02   | -0.15 | 0.879        | 0.956 |
| lh_G_insular_short         | 0.003  | -0.016, 0.021  | 0.27  | 0.788        | 0.956 |
| lh_G_occipital_middle      | -0.001 | -0.025, 0.022  | -0.12 | 0.901        | 0.956 |
| lh_G_occipital_sup         | -0.016 | -0.041, 0.01   | -1.21 | 0.227        | 0.935 |
| lh_G_oc.temp_lat.fusifor   | -0.010 | -0.038, 0.018  | -0.70 | 0.487        | 0.935 |
| lh_G_oc.temp_med.Lingual   | -0.001 | -0.037, 0.036  | -0.05 | 0.963        | 0.978 |
| lh_G_oc.temp_med.Parahip   | -0.012 | -0.037, 0.012  | -0.98 | 0.329        | 0.935 |
| lh_G_orbital               | 0.016  | -0.025, 0.056  | 0.76  | 0.449        | 0.935 |
| lh_G_pariet_inf.Angular    | 0.011  | -0.011, 0.033  | 0.99  | 0.321        | 0.935 |
| lh_G_pariet_inf.Supramar   | -0.012 | -0.031, 0.007  | -1.26 | 0.210        | 0.935 |
| lh_G_parietal_sup          | -0.006 | -0.026, 0.014  | -0.56 | 0.578        | 0.946 |
| lh_G_postcentral           | -0.029 | -0.053, -0.004 | -2.32 | <b>0.021</b> | 0.698 |
| lh_G_precentral            | -0.010 | -0.028, 0.009  | -1.04 | 0.301        | 0.935 |
| lh_G_precuneus             | -0.001 | -0.022, 0.019  | -0.13 | 0.898        | 0.956 |
| lh_G_rectus                | 0.016  | -0.057, 0.09   | 0.43  | 0.668        | 0.956 |
| lh_G_subcallosal           | 0.027  | -0.01, 0.063   | 1.43  | 0.155        | 0.924 |
| lh_G_temp_sup.G_T_transv   | -0.009 | -0.034, 0.016  | -0.74 | 0.459        | 0.935 |
| lh_G_temp_sup.Lateral      | -0.013 | -0.031, 0.006  | -1.34 | 0.180        | 0.935 |
| lh_G_temp_sup.Plan_polar   | -0.007 | -0.024, 0.01   | -0.77 | 0.441        | 0.935 |
| lh_G_temp_sup.Plan_tempo   | -0.019 | -0.042, 0.003  | -1.66 | 0.097        | 0.854 |
| lh_G_temporal_inf          | -0.009 | -0.043, 0.026  | -0.49 | 0.623        | 0.946 |
| lh_G_temporal_middle       | -0.008 | -0.031, 0.014  | -0.71 | 0.477        | 0.935 |
| lh_Lat_Fis.ant.Horizontal  | -0.002 | -0.03, 0.026   | -0.14 | 0.890        | 0.956 |
| lh_Lat_Fis.ant.Vertical    | -0.002 | -0.031, 0.028  | -0.13 | 0.900        | 0.956 |
| lh_Lat_Fis.post            | -0.012 | -0.038, 0.013  | -0.97 | 0.334        | 0.935 |
| lh_Pole_occipital          | -0.015 | -0.057, 0.027  | -0.71 | 0.476        | 0.935 |
| lh_Pole_temporal           | 0.015  | -0.017, 0.046  | 0.92  | 0.359        | 0.935 |
| lh_S_calcarine             | -0.003 | -0.035, 0.028  | -0.21 | 0.834        | 0.956 |
| lh_S_central               | -0.036 | -0.064, -0.008 | -2.52 | <b>0.012</b> | 0.698 |
| lh_S_cingul.Marginalis     | -0.019 | -0.04, 0.002   | -1.74 | 0.083        | 0.854 |
| lh_S_circular_insula_ant   | 0.014  | -0.011, 0.038  | 1.11  | 0.270        | 0.935 |
| lh_S_circular_insula_inf   | -0.014 | -0.034, 0.007  | -1.32 | 0.187        | 0.935 |
| lh_S_circular_insula_sup   | -0.021 | -0.041, -0.001 | -2.03 | <b>0.043</b> | 0.854 |
| lh_S_collat_transv_ant     | -0.003 | -0.035, 0.03   | -0.15 | 0.878        | 0.956 |
| lh_S_collat_transv_post    | -0.005 | -0.034, 0.025  | -0.31 | 0.756        | 0.956 |
| lh_S_front_inf             | 0.001  | -0.024, 0.027  | 0.11  | 0.914        | 0.956 |
| lh_S_front_middle          | -0.021 | -0.047, 0.005  | -1.56 | 0.119        | 0.885 |

**eTable 18. Differences in functional activity between the never-suicidal group and the caregiver-reported suicidality group for reward feedback: Welch's t-test**

| ROIs                         | Mean   | 95%CI          | t     | p (unc)      | p FDR |
|------------------------------|--------|----------------|-------|--------------|-------|
| lh_S_front_sup               | 0.001  | -0.017, 0.02   | 0.15  | 0.882        | 0.956 |
| lh_S_interm_prim.Jensen      | 0.006  | -0.021, 0.033  | 0.44  | 0.659        | 0.956 |
| lh_S_intrapariet_and_P_trans | 0.008  | -0.014, 0.029  | 0.69  | 0.492        | 0.935 |
| lh_S_oc_middle_and_Lunatus   | -0.011 | -0.04, 0.019   | -0.71 | 0.475        | 0.935 |
| lh_S_oc_sup_and_transversal  | 0.002  | -0.023, 0.027  | 0.13  | 0.900        | 0.956 |
| lh_S_occipital_ant           | -0.002 | -0.024, 0.02   | -0.18 | 0.856        | 0.956 |
| lh_S_oc.temp_lat             | -0.001 | -0.022, 0.019  | -0.12 | 0.908        | 0.956 |
| lh_S_oc.temp_med_and_Lingual | -0.006 | -0.026, 0.014  | -0.56 | 0.573        | 0.946 |
| lh_S_orbital_lateral         | 0.004  | -0.034, 0.042  | 0.21  | 0.837        | 0.956 |
| lh_S_orbital_med.olfact      | 0.016  | -0.046, 0.079  | 0.52  | 0.604        | 0.946 |
| lh_S_orbital.H_Shaped        | 0.006  | -0.025, 0.036  | 0.36  | 0.716        | 0.956 |
| lh_S_parieto_occipital       | -0.007 | -0.029, 0.015  | -0.59 | 0.555        | 0.946 |
| lh_S_pericallosal            | 0.010  | -0.015, 0.035  | 0.77  | 0.440        | 0.935 |
| lh_S_postcentral             | -0.003 | -0.024, 0.017  | -0.30 | 0.761        | 0.956 |
| lh_S_precentral.inf.part     | 0.009  | -0.015, 0.033  | 0.75  | 0.454        | 0.935 |
| lh_S_precentral.sup.part     | -0.003 | -0.022, 0.015  | -0.36 | 0.722        | 0.956 |
| lh_S_suborbital              | 0.003  | -0.046, 0.052  | 0.11  | 0.915        | 0.956 |
| lh_S_subparietal             | 0.007  | -0.017, 0.031  | 0.61  | 0.545        | 0.946 |
| lh_S_temporal_inf            | -0.011 | -0.044, 0.022  | -0.64 | 0.523        | 0.946 |
| lh_S_temporal_sup            | -0.012 | -0.03, 0.007   | -1.25 | 0.212        | 0.935 |
| lh_S_temporal_transverse     | -0.012 | -0.043, 0.018  | -0.81 | 0.420        | 0.935 |
| rh_G_and_S_frontomargin      | -0.001 | -0.052, 0.051  | -0.02 | 0.984        | 0.984 |
| rh_G_and_S_occipital_inf     | 0.016  | -0.016, 0.047  | 0.98  | 0.329        | 0.935 |
| rh_G_and_S_paracentral       | -0.006 | -0.03, 0.019   | -0.45 | 0.653        | 0.956 |
| rh_G_and_S_subcentral        | -0.028 | -0.052, -0.003 | -2.20 | <b>0.028</b> | 0.783 |
| rh_G_and_S_transv_frontopol  | 0.000  | -0.036, 0.035  | -0.03 | 0.979        | 0.984 |
| rh_G_and_S_cingul.Ant        | 0.001  | -0.023, 0.025  | 0.09  | 0.931        | 0.960 |
| rh_G_and_S_cingul.Mid.Ant    | -0.010 | -0.03, 0.01    | -0.97 | 0.335        | 0.935 |
| rh_G_and_S_cingul.Mid.Post   | -0.015 | -0.034, 0.004  | -1.54 | 0.125        | 0.885 |
| rh_G_cingul.Post.dorsal      | 0.005  | -0.015, 0.026  | 0.52  | 0.606        | 0.946 |
| rh_G_cingul.Post.ventral     | -0.007 | -0.041, 0.027  | -0.41 | 0.682        | 0.956 |
| rh_G_cuneus                  | -0.023 | -0.054, 0.009  | -1.43 | 0.153        | 0.924 |
| rh_G_front_inf.Opercular     | -0.009 | -0.031, 0.014  | -0.75 | 0.455        | 0.935 |
| rh_G_front_inf.Orbital       | -0.003 | -0.037, 0.031  | -0.16 | 0.875        | 0.956 |
| rh_G_front_inf.Triangul      | -0.005 | -0.03, 0.021   | -0.37 | 0.713        | 0.956 |
| rh_G_front_middle            | 0.002  | -0.022, 0.025  | 0.13  | 0.897        | 0.956 |
| rh_G_front_sup               | -0.003 | -0.019, 0.014  | -0.30 | 0.766        | 0.956 |
| rh_G_Ins_lg_and_S_cent_ins   | -0.010 | -0.034, 0.013  | -0.89 | 0.375        | 0.935 |
| rh_G_insular_short           | 0.002  | -0.017, 0.022  | 0.23  | 0.820        | 0.956 |
| rh_G_occipital_middle        | 0.012  | -0.011, 0.034  | 1.02  | 0.308        | 0.935 |
| rh_G_occipital_sup           | -0.025 | -0.051, 0.001  | -1.91 | 0.057        | 0.854 |
| rh_G_oc.temp_lat.fusifor     | 0.005  | -0.024, 0.033  | 0.33  | 0.739        | 0.956 |
| rh_G_oc.temp_med.Lingual     | -0.026 | -0.062, 0.009  | -1.46 | 0.146        | 0.924 |

**eTable 18. Differences in functional activity between the never-suicidal group and the caregiver-reported suicidality group for reward feedback: Welch's t-test**

| ROIs                         | Mean   | 95%CI          | t     | p (unc)      | p FDR |
|------------------------------|--------|----------------|-------|--------------|-------|
| rh_G_oc.temp_med.Parahip     | -0.001 | -0.03, 0.028   | -0.04 | 0.966        | 0.978 |
| rh_G_orbital                 | 0.030  | -0.009, 0.07   | 1.53  | 0.127        | 0.885 |
| rh_G_pariet_inf.Angular      | 0.008  | -0.012, 0.029  | 0.79  | 0.429        | 0.935 |
| rh_G_pariet_inf.Supramar     | -0.010 | -0.028, 0.008  | -1.07 | 0.286        | 0.935 |
| rh_G_parietal_sup            | -0.005 | -0.025, 0.015  | -0.53 | 0.598        | 0.946 |
| rh_G_postcentral             | -0.022 | -0.045, 0.001  | -1.89 | 0.059        | 0.854 |
| rh_G_precentral              | -0.006 | -0.024, 0.011  | -0.72 | 0.471        | 0.935 |
| rh_G_precuneus               | 0.003  | -0.018, 0.024  | 0.27  | 0.785        | 0.956 |
| rh_G_rectus                  | 0.061  | -0.027, 0.149  | 1.37  | 0.173        | 0.935 |
| rh_G_subcallosal             | 0.023  | -0.013, 0.059  | 1.26  | 0.209        | 0.935 |
| rh_G_temp_sup.G_T_transv     | -0.023 | -0.049, 0.002  | -1.84 | 0.067        | 0.854 |
| rh_G_temp_sup.Lateral        | -0.005 | -0.023, 0.014  | -0.50 | 0.615        | 0.946 |
| rh_G_temp_sup.Plan_polar     | 0.008  | -0.01, 0.025   | 0.84  | 0.403        | 0.935 |
| rh_G_temp_sup.Plan_tempo     | -0.014 | -0.038, 0.01   | -1.12 | 0.265        | 0.935 |
| rh_G_temporal_inf            | 0.021  | -0.016, 0.058  | 1.10  | 0.273        | 0.935 |
| rh_G_temporal_middle         | -0.002 | -0.025, 0.022  | -0.15 | 0.883        | 0.956 |
| rh_Lat_Fis.ant.Horizontal    | 0.005  | -0.021, 0.032  | 0.40  | 0.686        | 0.956 |
| rh_Lat_Fis.ant.Vertical      | 0.020  | -0.014, 0.054  | 1.14  | 0.255        | 0.935 |
| rh_Lat_Fis.post              | -0.038 | -0.064, -0.013 | -2.95 | <b>0.003</b> | 0.566 |
| rh_Pole_occipital            | 0.004  | -0.035, 0.044  | 0.21  | 0.833        | 0.956 |
| rh_Pole_temporal             | -0.010 | -0.047, 0.028  | -0.51 | 0.610        | 0.946 |
| rh_S_calcarine               | -0.012 | -0.044, 0.02   | -0.76 | 0.449        | 0.935 |
| rh_S_central                 | -0.033 | -0.06, -0.006  | -2.44 | <b>0.015</b> | 0.698 |
| rh_S_cingul.Marginalis       | -0.019 | -0.038, 0      | -1.96 | 0.051        | 0.854 |
| rh_S_circular_insula_ant     | 0.019  | -0.003, 0.041  | 1.67  | 0.095        | 0.854 |
| rh_S_circular_insula_inf     | -0.017 | -0.038, 0.004  | -1.64 | 0.102        | 0.854 |
| rh_S_circular_insula_sup     | -0.026 | -0.047, -0.005 | -2.40 | <b>0.017</b> | 0.698 |
| rh_S_collat_transv_ant       | -0.002 | -0.038, 0.034  | -0.09 | 0.925        | 0.960 |
| rh_S_collat_transv_post      | -0.006 | -0.035, 0.024  | -0.38 | 0.705        | 0.956 |
| rh_S_front_inf               | 0.007  | -0.018, 0.032  | 0.56  | 0.575        | 0.946 |
| rh_S_front_middle            | -0.004 | -0.03, 0.022   | -0.34 | 0.736        | 0.956 |
| rh_S_front_sup               | 0.009  | -0.01, 0.027   | 0.91  | 0.365        | 0.935 |
| rh_S_interm_prim.Jensen      | 0.006  | -0.018, 0.03   | 0.47  | 0.637        | 0.956 |
| rh_S_intrapariet_and_P_trans | 0.011  | -0.01, 0.032   | 1.04  | 0.301        | 0.935 |
| rh_S_oc_middle_and_Lunatus   | 0.002  | -0.025, 0.03   | 0.18  | 0.860        | 0.956 |
| rh_S_oc_sup_and_transversal  | 0.003  | -0.021, 0.027  | 0.24  | 0.812        | 0.956 |
| rh_S_occipital_ant           | -0.009 | -0.031, 0.012  | -0.87 | 0.385        | 0.935 |
| rh_S_oc.temp_lat             | 0.020  | -0.001, 0.04   | 1.84  | 0.067        | 0.854 |
| rh_S_oc.temp_med_and_Lingual | -0.012 | -0.032, 0.008  | -1.17 | 0.243        | 0.935 |
| rh_S_orbital_lateral         | 0.003  | -0.033, 0.038  | 0.15  | 0.877        | 0.956 |
| rh_S_orbital_med.olfact      | 0.044  | -0.018, 0.105  | 1.40  | 0.162        | 0.932 |
| rh_S_orbital.H_Shaped        | 0.024  | -0.006, 0.054  | 1.58  | 0.114        | 0.885 |
| rh_S_parieto_occipital       | -0.013 | -0.035, 0.008  | -1.25 | 0.213        | 0.935 |

**eTable 18. Differences in functional activity between the never-suicidal group and the caregiver-reported suicidality group for reward feedback: Welch's t-test**

| ROIs                     | Mean   | 95%CI         | t     | p (unc) | p FDR |
|--------------------------|--------|---------------|-------|---------|-------|
| rh_S_pericallosal        | -0.007 | -0.036, 0.022 | -0.46 | 0.646   | 0.956 |
| rh_S_postcentral         | -0.010 | -0.029, 0.009 | -1.05 | 0.293   | 0.935 |
| rh_S_precentral.inf.part | 0.006  | -0.017, 0.03  | 0.53  | 0.598   | 0.946 |
| rh_S_precentral.sup.part | -0.010 | -0.028, 0.009 | -1.05 | 0.296   | 0.935 |
| rh_S_suborbital          | -0.021 | -0.095, 0.052 | -0.58 | 0.565   | 0.946 |
| rh_S_subparietal         | 0.008  | -0.015, 0.031 | 0.69  | 0.492   | 0.935 |
| rh_S_temporal_inf        | 0.016  | -0.019, 0.051 | 0.89  | 0.375   | 0.935 |
| rh_S_temporal_sup        | -0.004 | -0.022, 0.014 | -0.43 | 0.669   | 0.956 |
| rh_S_temporal_transverse | -0.018 | -0.051, 0.014 | -1.13 | 0.260   | 0.935 |

**Bold** denotes group differences at p<0.05 uncorrected

**eTable 19. Differences in functional activity between the never-suicidal group and the concordantly-reported suicidality group for reward feedback: Welch's t-test**

| ROIs                        | Mean   | 95%CI          | t     | p (unc)      | p FDR |
|-----------------------------|--------|----------------|-------|--------------|-------|
| <b>Subcortical regions</b>  |        |                |       |              |       |
| Left.Cerebellum.Cortex      | 0.008  | -0.051, 0.067  | 0.27  | 0.789        | 0.845 |
| Left.Thalamus.Proper        | -0.027 | -0.058, 0.004  | -1.70 | 0.093        | 0.310 |
| Left.Caudate                | -0.033 | -0.076, 0.01   | -1.54 | 0.126        | 0.335 |
| Left.Putamen                | -0.037 | -0.078, 0.004  | -1.80 | 0.075        | 0.280 |
| Left.Pallidum               | 0.000  | -0.033, 0.034  | 0.03  | 0.977        | 0.983 |
| Brain.Stem                  | -0.021 | -0.059, 0.017  | -1.10 | 0.274        | 0.503 |
| Left.Hippocampus            | -0.011 | -0.041, 0.019  | -0.75 | 0.458        | 0.621 |
| Left.Amygdala               | -0.040 | -0.074, -0.007 | -2.42 | <b>0.018</b> | 0.193 |
| Left.Accumbens.area         | -0.001 | -0.05, 0.047   | -0.05 | 0.958        | 0.969 |
| Left.VentralDC              | -0.011 | -0.055, 0.032  | -0.52 | 0.602        | 0.715 |
| Right.Cerebellum.Cortex     | -0.042 | -0.104, 0.02   | -1.35 | 0.179        | 0.410 |
| Right.Thalamus.Proper       | -0.022 | -0.055, 0.012  | -1.29 | 0.202        | 0.416 |
| Right.Caudate               | -0.031 | -0.078, 0.017  | -1.27 | 0.206        | 0.418 |
| Right.Putamen               | -0.010 | -0.048, 0.029  | -0.49 | 0.623        | 0.719 |
| Right.Pallidum              | 0.033  | 0, 0.066       | 1.96  | 0.053        | 0.248 |
| Right.Hippocampus           | -0.043 | -0.074, -0.012 | -2.72 | <b>0.008</b> | 0.174 |
| Right.Amygdala              | -0.043 | -0.085, -0.002 | -2.06 | <b>0.042</b> | 0.233 |
| Right.Accumbens.area        | 0.018  | -0.029, 0.064  | 0.75  | 0.454        | 0.621 |
| Right.VentralDC             | -0.018 | -0.056, 0.021  | -0.91 | 0.367        | 0.572 |
| <b>Cortical regions</b>     |        |                |       |              |       |
| lh_G_and_S_frontomargin     | -0.006 | -0.097, 0.084  | -0.14 | 0.893        | 0.932 |
| lh_G_and_S_occipital_inf    | -0.016 | -0.08, 0.048   | -0.49 | 0.629        | 0.719 |
| lh_G_and_S_paracentral      | -0.017 | -0.061, 0.027  | -0.76 | 0.448        | 0.621 |
| lh_G_and_S_subcentral       | -0.049 | -0.091, -0.006 | -2.26 | <b>0.026</b> | 0.206 |
| lh_G_and_S_transv_frontopol | -0.122 | -0.205, -0.039 | -2.93 | <b>0.004</b> | 0.174 |

**eTable 19. Differences in functional activity between the never-suicidal group and the concordantly-reported suicidality group for reward feedback: Welch's t-test**

| ROIs                       | Mean   | 95%CI          | t     | p (unc)      | p FDR |
|----------------------------|--------|----------------|-------|--------------|-------|
| lh_G_and_S_cingul.Ant      | -0.007 | -0.047, 0.033  | -0.35 | 0.727        | 0.804 |
| lh_G_and_S_cingul.Mid.Ant  | -0.039 | -0.077, -0.002 | -2.08 | <b>0.040</b> | 0.233 |
| lh_G_and_S_cingul.Mid.Post | -0.048 | -0.083, -0.014 | -2.76 | <b>0.007</b> | 0.174 |
| lh_G_cingul.Post.dorsal    | -0.017 | -0.056, 0.023  | -0.84 | 0.402        | 0.589 |
| lh_G_cingul.Post.ventral   | -0.038 | -0.114, 0.037  | -1.01 | 0.317        | 0.540 |
| lh_G_cuneus                | -0.077 | -0.139, -0.015 | -2.47 | <b>0.015</b> | 0.182 |
| lh_G_front_inf.Opercular   | -0.038 | -0.079, 0.003  | -1.86 | 0.066        | 0.271 |
| lh_G_front_inf.Orbital     | -0.021 | -0.078, 0.036  | -0.73 | 0.465        | 0.626 |
| lh_G_front_inf.Triangul    | -0.026 | -0.07, 0.019   | -1.15 | 0.252        | 0.490 |
| lh_G_front_middle          | -0.024 | -0.062, 0.014  | -1.27 | 0.208        | 0.418 |
| lh_G_front_sup             | -0.035 | -0.065, -0.005 | -2.35 | <b>0.021</b> | 0.193 |
| lh_G_Ins_lg_and_S_cent_ins | -0.047 | -0.087, -0.007 | -2.32 | <b>0.022</b> | 0.193 |
| lh_G_insular_short         | -0.001 | -0.038, 0.036  | -0.06 | 0.950        | 0.968 |
| lh_G_occipital_middle      | -0.028 | -0.074, 0.018  | -1.21 | 0.231        | 0.453 |
| lh_G_occipital_sup         | -0.025 | -0.072, 0.022  | -1.05 | 0.298        | 0.533 |
| lh_G_oc.temp_lat.fusifor   | -0.038 | -0.094, 0.019  | -1.32 | 0.190        | 0.412 |
| lh_G_oc.temp_med.Lingual   | -0.034 | -0.103, 0.034  | -1.00 | 0.322        | 0.543 |
| lh_G_oc.temp_med.Parahip   | -0.026 | -0.071, 0.019  | -1.15 | 0.255        | 0.490 |
| lh_G_orbital               | -0.020 | -0.097, 0.056  | -0.53 | 0.599        | 0.715 |
| lh_G_pariet_inf.Angular    | -0.017 | -0.056, 0.023  | -0.84 | 0.406        | 0.589 |
| lh_G_pariet_inf.Supramar   | -0.040 | -0.074, -0.006 | -2.34 | <b>0.022</b> | 0.193 |
| lh_G_parietal_sup          | -0.053 | -0.094, -0.013 | -2.60 | <b>0.011</b> | 0.174 |
| lh_G_postcentral           | -0.062 | -0.108, -0.017 | -2.71 | <b>0.008</b> | 0.174 |
| lh_G_precentral            | -0.039 | -0.073, -0.005 | -2.31 | <b>0.023</b> | 0.193 |
| lh_G_precuneus             | -0.049 | -0.087, -0.011 | -2.58 | <b>0.011</b> | 0.174 |
| lh_G_rectus                | 0.008  | -0.121, 0.138  | 0.13  | 0.898        | 0.932 |
| lh_G_subcallosal           | 0.007  | -0.057, 0.071  | 0.22  | 0.827        | 0.880 |
| lh_G_temp_sup.G_T_transv   | -0.048 | -0.096, -0.001 | -2.03 | <b>0.045</b> | 0.233 |
| lh_G_temp_sup.Lateral      | -0.048 | -0.084, -0.012 | -2.63 | <b>0.010</b> | 0.174 |
| lh_G_temp_sup.Plan_polar   | -0.004 | -0.035, 0.027  | -0.28 | 0.780        | 0.845 |
| lh_G_temp_sup.Plan_tempo   | -0.042 | -0.084, 0.001  | -1.94 | 0.055        | 0.248 |
| lh_G_temporal_inf          | 0.020  | -0.044, 0.083  | 0.62  | 0.536        | 0.689 |
| lh_G_temporal_middle       | -0.037 | -0.086, 0.011  | -1.53 | 0.130        | 0.335 |
| lh_Lat_Fis.ant.Horizontal  | -0.044 | -0.097, 0.009  | -1.66 | 0.101        | 0.316 |
| lh_Lat_Fis.ant.Vertical    | -0.042 | -0.101, 0.016  | -1.43 | 0.156        | 0.379 |
| lh_Lat_Fis.post            | -0.041 | -0.086, 0.003  | -1.83 | 0.070        | 0.276 |
| lh_Pole_occipital          | -0.047 | -0.121, 0.027  | -1.26 | 0.212        | 0.421 |
| lh_Pole_temporal           | -0.004 | -0.063, 0.054  | -0.15 | 0.881        | 0.925 |
| lh_S_calcarine             | -0.031 | -0.09, 0.028   | -1.04 | 0.300        | 0.533 |
| lh_S_central               | -0.076 | -0.126, -0.027 | -3.06 | <b>0.003</b> | 0.174 |
| lh_S_cingul.Marginalis     | -0.033 | -0.069, 0.003  | -1.82 | 0.071        | 0.276 |
| lh_S_circular_insula_ant   | 0.011  | -0.034, 0.057  | 0.49  | 0.626        | 0.719 |
| lh_S_circular_insula_inf   | -0.018 | -0.055, 0.02   | -0.93 | 0.354        | 0.557 |

**eTable 19. Differences in functional activity between the never-suicidal group and the concordantly-reported suicidality group for reward feedback: Welch's t-test**

| ROIs                         | Mean   | 95%CI          | t     | p (unc)      | p FDR |
|------------------------------|--------|----------------|-------|--------------|-------|
| lh_S_circular_insula_sup     | -0.039 | -0.075, -0.004 | -2.19 | <b>0.031</b> | 0.208 |
| lh_S_collat_transv_ant       | 0.000  | -0.065, 0.065  | 0.00  | 0.998        | 0.998 |
| lh_S_collat_transv_post      | -0.006 | -0.067, 0.056  | -0.18 | 0.857        | 0.906 |
| lh_S_front_inf               | -0.038 | -0.085, 0.009  | -1.61 | 0.112        | 0.316 |
| lh_S_front_middle            | -0.035 | -0.079, 0.008  | -1.62 | 0.109        | 0.316 |
| lh_S_front_sup               | -0.015 | -0.049, 0.019  | -0.88 | 0.382        | 0.586 |
| lh_S_interm_prim.Jensen      | -0.013 | -0.064, 0.038  | -0.50 | 0.617        | 0.719 |
| lh_S_intrapariet_and_P_trans | -0.030 | -0.071, 0.011  | -1.45 | 0.151        | 0.377 |
| lh_S_oc_middle_and_Lunatus   | -0.054 | -0.105, -0.003 | -2.11 | <b>0.038</b> | 0.233 |
| lh_S_oc_sup_and_transversal  | -0.034 | -0.082, 0.013  | -1.43 | 0.157        | 0.379 |
| lh_S_occipital_ant           | -0.026 | -0.066, 0.014  | -1.30 | 0.199        | 0.415 |
| lh_S_oc.temp_lat             | -0.016 | -0.057, 0.025  | -0.77 | 0.444        | 0.621 |
| lh_S_oc.temp_med_and_Lingual | -0.015 | -0.054, 0.024  | -0.78 | 0.437        | 0.621 |
| lh_S_orbital_lateral         | -0.024 | -0.095, 0.047  | -0.66 | 0.509        | 0.664 |
| lh_S_orbital_med.olfact      | 0.043  | -0.069, 0.155  | 0.76  | 0.448        | 0.621 |
| lh_S_orbital.H_Shaped        | -0.025 | -0.079, 0.03   | -0.90 | 0.371        | 0.573 |
| lh_S_parieto_occipital       | -0.030 | -0.068, 0.009  | -1.52 | 0.131        | 0.335 |
| lh_S_pericallosal            | -0.002 | -0.049, 0.046  | -0.07 | 0.942        | 0.965 |
| lh_S_postcentral             | -0.043 | -0.086, -0.001 | -2.03 | <b>0.046</b> | 0.233 |
| lh_S_precentral.inf.part     | -0.014 | -0.059, 0.031  | -0.62 | 0.536        | 0.689 |
| lh_S_precentral.sup.part     | -0.013 | -0.048, 0.023  | -0.70 | 0.483        | 0.640 |
| lh_S_suborbital              | 0.042  | -0.043, 0.128  | 0.98  | 0.328        | 0.543 |
| lh_S_subparietal             | -0.050 | -0.095, -0.005 | -2.20 | <b>0.030</b> | 0.208 |
| lh_S_temporal_inf            | -0.010 | -0.073, 0.053  | -0.31 | 0.756        | 0.825 |
| lh_S_temporal_sup            | -0.032 | -0.067, 0.002  | -1.86 | 0.066        | 0.271 |
| lh_S_temporal_transverse     | -0.027 | -0.088, 0.035  | -0.86 | 0.390        | 0.587 |
| rh_G_and_S_frontomargin      | -0.047 | -0.147, 0.052  | -0.94 | 0.348        | 0.553 |
| rh_G_and_S_occipital_inf     | -0.049 | -0.106, 0.008  | -1.71 | 0.090        | 0.310 |
| rh_G_and_S_paracentral       | -0.026 | -0.072, 0.02   | -1.13 | 0.259        | 0.492 |
| rh_G_and_S_subcentral        | -0.057 | -0.101, -0.014 | -2.61 | <b>0.011</b> | 0.174 |
| rh_G_and_S_transv_frontopol  | -0.038 | -0.106, 0.03   | -1.10 | 0.273        | 0.503 |
| rh_G_and_S_cingul.Ant        | -0.010 | -0.049, 0.029  | -0.52 | 0.604        | 0.715 |
| rh_G_and_S_cingul.Mid.Ant    | -0.030 | -0.067, 0.007  | -1.63 | 0.107        | 0.316 |
| rh_G_and_S_cingul.Mid.Post   | -0.040 | -0.076, -0.004 | -2.22 | <b>0.029</b> | 0.208 |
| rh_G_cingul.Post.dorsal      | -0.010 | -0.051, 0.03   | -0.51 | 0.612        | 0.719 |
| rh_G_cingul.Post.ventral     | -0.052 | -0.11, 0.005   | -1.81 | 0.073        | 0.276 |
| rh_G_cuneus                  | -0.053 | -0.113, 0.007  | -1.75 | 0.084        | 0.298 |
| rh_G_front_inf.Opercular     | -0.034 | -0.073, 0.004  | -1.76 | 0.081        | 0.293 |
| rh_G_front_inf.Orbital       | -0.018 | -0.077, 0.042  | -0.59 | 0.557        | 0.689 |
| rh_G_front_inf.Triangul      | -0.036 | -0.082, 0.01   | -1.54 | 0.127        | 0.335 |
| rh_G_front_middle            | -0.028 | -0.07, 0.014   | -1.31 | 0.192        | 0.412 |
| rh_G_front_sup               | -0.029 | -0.058, -0.001 | -2.02 | <b>0.046</b> | 0.233 |
| rh_G_Ins_lg_and_S_cent_ins   | -0.048 | -0.091, -0.005 | -2.24 | <b>0.028</b> | 0.208 |

**eTable 19. Differences in functional activity between the never-suicidal group and the concordantly-reported suicidality group for reward feedback: Welch's t-test**

| ROIs                         | Mean   | 95%CI          | t     | p (unc)      | p FDR |
|------------------------------|--------|----------------|-------|--------------|-------|
| rh_G_insular_short           | -0.007 | -0.044, 0.03   | -0.36 | 0.717        | 0.798 |
| rh_G_occipital_middle        | -0.021 | -0.065, 0.023  | -0.96 | 0.338        | 0.553 |
| rh_G_occipital_sup           | -0.060 | -0.108, -0.013 | -2.51 | <b>0.014</b> | 0.177 |
| rh_G_oc.temp_lat.fusifor     | -0.054 | -0.109, 0.001  | -1.96 | 0.053        | 0.248 |
| rh_G_oc.temp_med.Lingual     | -0.054 | -0.121, 0.012  | -1.62 | 0.110        | 0.316 |
| rh_G_oc.temp_med.Parahip     | -0.037 | -0.092, 0.019  | -1.31 | 0.194        | 0.412 |
| rh_G_orbital                 | -0.026 | -0.093, 0.041  | -0.76 | 0.450        | 0.621 |
| rh_G_pariet_inf.Angular      | -0.042 | -0.078, -0.006 | -2.32 | <b>0.022</b> | 0.193 |
| rh_G_pariet_inf.Supramar     | -0.028 | -0.064, 0.008  | -1.56 | 0.122        | 0.335 |
| rh_G_parietal_sup            | -0.042 | -0.08, -0.003  | -2.16 | <b>0.033</b> | 0.213 |
| rh_G_postcentral             | -0.034 | -0.077, 0.009  | -1.55 | 0.124        | 0.335 |
| rh_G_precentral              | -0.014 | -0.047, 0.019  | -0.86 | 0.394        | 0.588 |
| rh_G_precuneus               | -0.039 | -0.08, 0.002   | -1.87 | 0.065        | 0.271 |
| rh_G_rectus                  | 0.109  | -0.054, 0.273  | 1.33  | 0.186        | 0.412 |
| rh_G_subcallosal             | 0.010  | -0.062, 0.081  | 0.27  | 0.789        | 0.845 |
| rh_G_temp_sup.G_T_transv     | -0.034 | -0.078, 0.01   | -1.52 | 0.132        | 0.335 |
| rh_G_temp_sup.Lateral        | -0.045 | -0.079, -0.011 | -2.65 | <b>0.009</b> | 0.174 |
| rh_G_temp_sup.Plan_polar     | -0.008 | -0.039, 0.023  | -0.53 | 0.595        | 0.715 |
| rh_G_temp_sup.Plan_tempo     | -0.023 | -0.064, 0.018  | -1.12 | 0.266        | 0.499 |
| rh_G_temporal_inf            | 0.028  | -0.046, 0.102  | 0.76  | 0.451        | 0.621 |
| rh_G_temporal_middle         | -0.023 | -0.069, 0.022  | -1.01 | 0.315        | 0.540 |
| rh_Lat_Fis.ant.Horizontal    | -0.041 | -0.092, 0.01   | -1.61 | 0.112        | 0.316 |
| rh_Lat_Fis.ant.Vertical      | -0.063 | -0.129, 0.004  | -1.86 | 0.066        | 0.271 |
| rh_Lat_Fis.post              | -0.039 | -0.086, 0.009  | -1.62 | 0.108        | 0.316 |
| rh_Pole_occipital            | -0.033 | -0.109, 0.044  | -0.85 | 0.400        | 0.589 |
| rh_Pole_temporal             | -0.016 | -0.086, 0.054  | -0.45 | 0.656        | 0.740 |
| rh_S_calcarine               | -0.029 | -0.088, 0.031  | -0.95 | 0.347        | 0.553 |
| rh_S_central                 | -0.047 | -0.093, -0.001 | -2.04 | <b>0.044</b> | 0.233 |
| rh_S_cingul.Marginalis       | -0.048 | -0.085, -0.011 | -2.55 | <b>0.012</b> | 0.174 |
| rh_S_circular_insula_ant     | 0.012  | -0.03, 0.054   | 0.59  | 0.557        | 0.689 |
| rh_S_circular_insula_inf     | -0.026 | -0.064, 0.012  | -1.37 | 0.173        | 0.402 |
| rh_S_circular_insula_sup     | -0.059 | -0.1, -0.019   | -2.92 | <b>0.004</b> | 0.174 |
| rh_S_collat_transv_ant       | 0.013  | -0.055, 0.081  | 0.38  | 0.707        | 0.792 |
| rh_S_collat_transv_post      | -0.012 | -0.067, 0.043  | -0.45 | 0.655        | 0.740 |
| rh_S_front_inf               | -0.014 | -0.063, 0.034  | -0.60 | 0.552        | 0.689 |
| rh_S_front_middle            | -0.025 | -0.072, 0.023  | -1.03 | 0.308        | 0.540 |
| rh_S_front_sup               | -0.023 | -0.056, 0.009  | -1.42 | 0.159        | 0.379 |
| rh_S_interm_prim.Jensen      | -0.031 | -0.076, 0.013  | -1.41 | 0.163        | 0.384 |
| rh_S_intrapariet_and_P_trans | -0.021 | -0.063, 0.021  | -0.99 | 0.326        | 0.543 |
| rh_S_oc_middle_and_Lunatus   | -0.019 | -0.072, 0.033  | -0.73 | 0.470        | 0.628 |
| rh_S_oc_sup_and_transversal  | -0.014 | -0.058, 0.031  | -0.61 | 0.545        | 0.689 |
| rh_S_occipital_ant           | -0.022 | -0.066, 0.021  | -1.01 | 0.317        | 0.540 |
| rh_S_oc.temp_lat             | -0.012 | -0.056, 0.031  | -0.57 | 0.568        | 0.697 |



**eTable 19. Differences in functional activity between the never-suicidal group and the concordantly-reported suicidality group for reward feedback: Welch's t-test**

| <b>ROIs</b>                  | <b>Mean</b> | <b>95%CI</b>  | <b>t</b> | <b>p (unc)</b> | <b>p FDR</b> |
|------------------------------|-------------|---------------|----------|----------------|--------------|
| rh_S_oc.temp.med.and.Lingual | -0.019      | -0.054, 0.017 | -1.05    | 0.298          | 0.533        |
| rh_S_orbital_lateral         | -0.023      | -0.088, 0.043 | -0.69    | 0.493          | 0.649        |
| rh_S_orbital.med.olfact      | -0.020      | -0.138, 0.099 | -0.33    | 0.741          | 0.814        |
| rh_S_orbital.H_Shaped        | 0.003       | -0.046, 0.052 | 0.11     | 0.914          | 0.942        |
| rh_S_parieto_occipital       | -0.035      | -0.077, 0.007 | -1.66    | 0.099          | 0.316        |
| rh_S_pericallosal            | -0.025      | -0.083, 0.033 | -0.87    | 0.387          | 0.587        |
| rh_S_postcentral             | -0.034      | -0.068, 0.001 | -1.95    | 0.054          | 0.248        |
| rh_S_precentral.inf.part     | -0.030      | -0.076, 0.015 | -1.34    | 0.184          | 0.412        |
| rh_S_precentral.sup.part     | -0.023      | -0.057, 0.012 | -1.30    | 0.195          | 0.412        |
| rh_S_suborbital              | 0.039       | -0.099, 0.177 | 0.56     | 0.578          | 0.705        |
| rh_S_subparietal             | -0.036      | -0.079, 0.006 | -1.71    | 0.091          | 0.310        |
| rh_S_temporal_inf            | -0.020      | -0.085, 0.045 | -0.61    | 0.542          | 0.689        |
| rh_S_temporal_sup            | -0.025      | -0.056, 0.006 | -1.63    | 0.107          | 0.316        |
| rh_S_temporal_transverse     | -0.028      | -0.085, 0.03  | -0.96    | 0.342          | 0.553        |

**Bold** denotes group differences at  $p < 0.05$  uncorrected

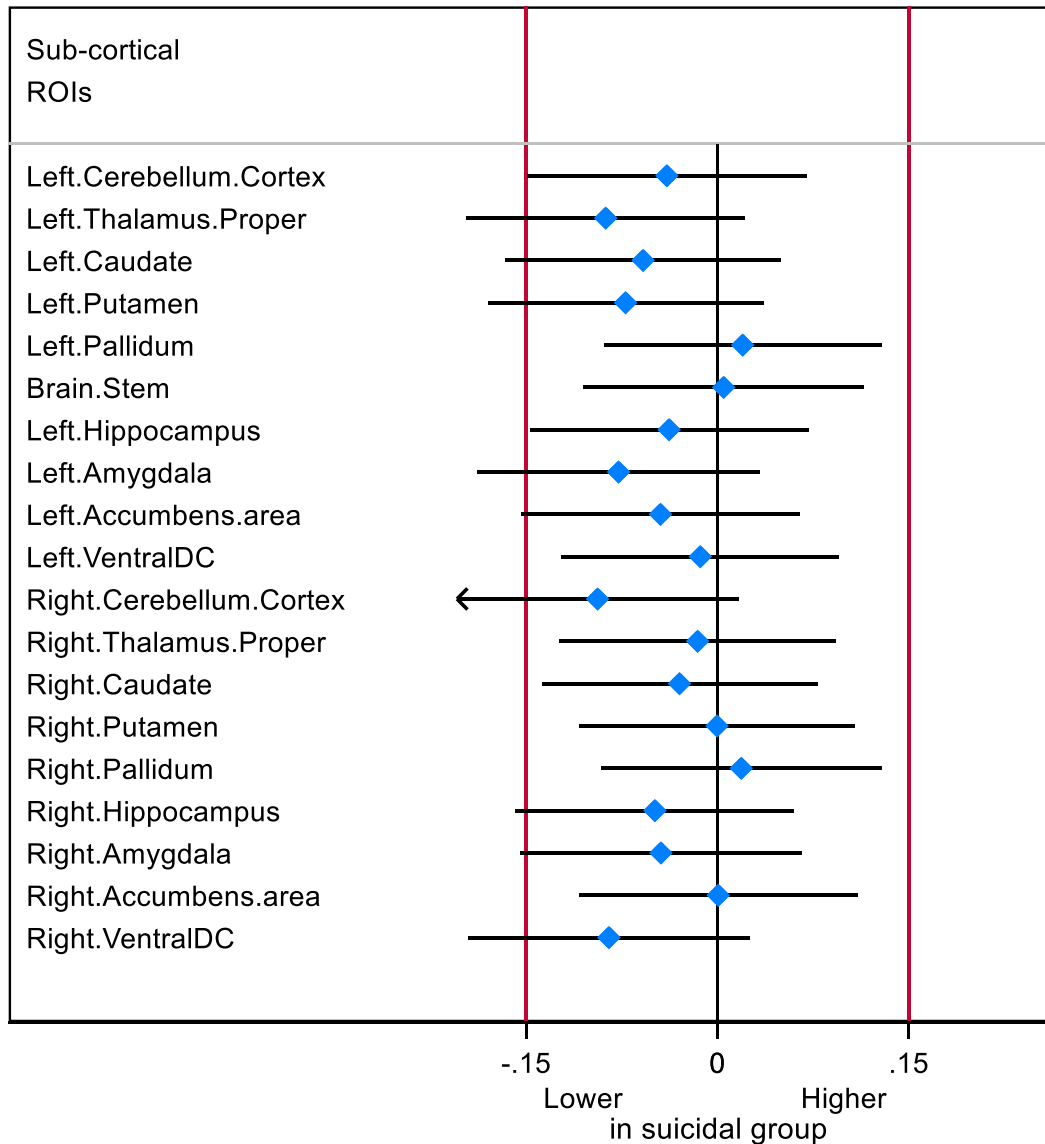

**eFigure 24.** Results of the Equivalence test for differences in functional activity in subcortical regions between the never-suicidal group and the child-reported suicidality group for reward feedback. The figure shows the effect sizes and 95% confidence intervals of the difference against the interval of equivalence (-0.15 to 0.15).

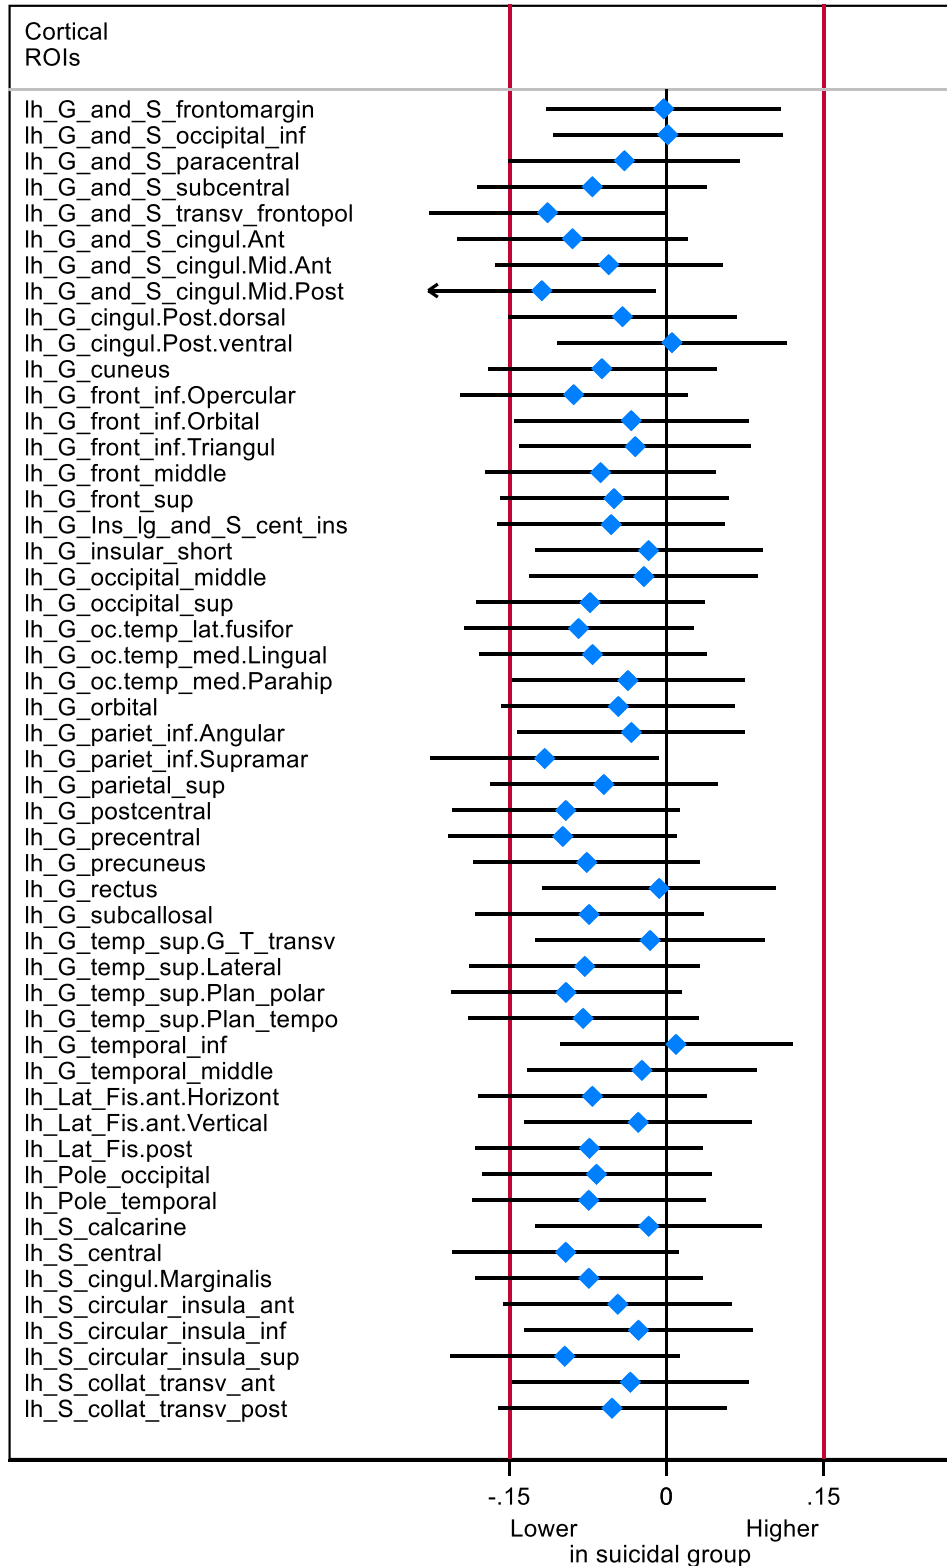

**eFigure 25 (1 of 3).** Results of the Equivalence test for differences in functional activity in cortical regions between the never-suicidal group and the child-reported suicidality group for reward feedback. The figure shows the effect sizes and 95% confidence intervals of the difference against the interval of equivalence (-0.15 to 0.15).

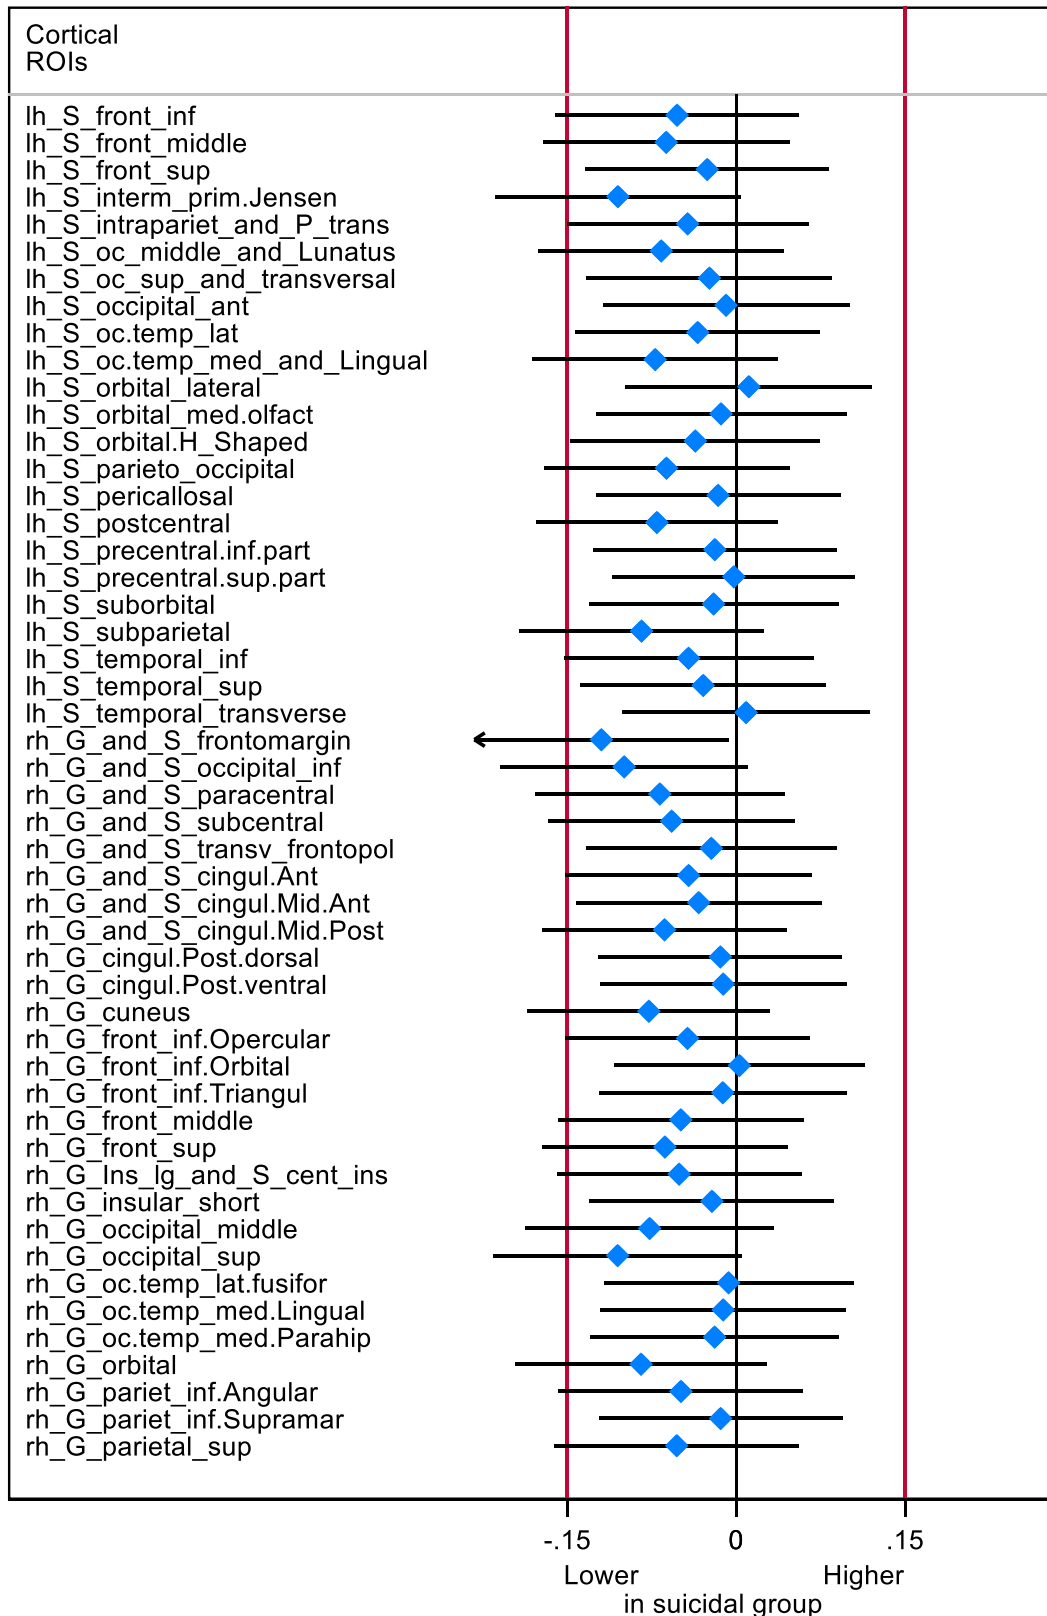

**eFigure 25 (2 of 3).** Results of the Equivalence test for differences in functional activity in cortical regions between the never-suicidal group and the child-reported suicidality group for reward feedback. The figure shows the effect sizes and 95% confidence intervals of the difference against the interval of equivalence (-0.15 to 0.15).

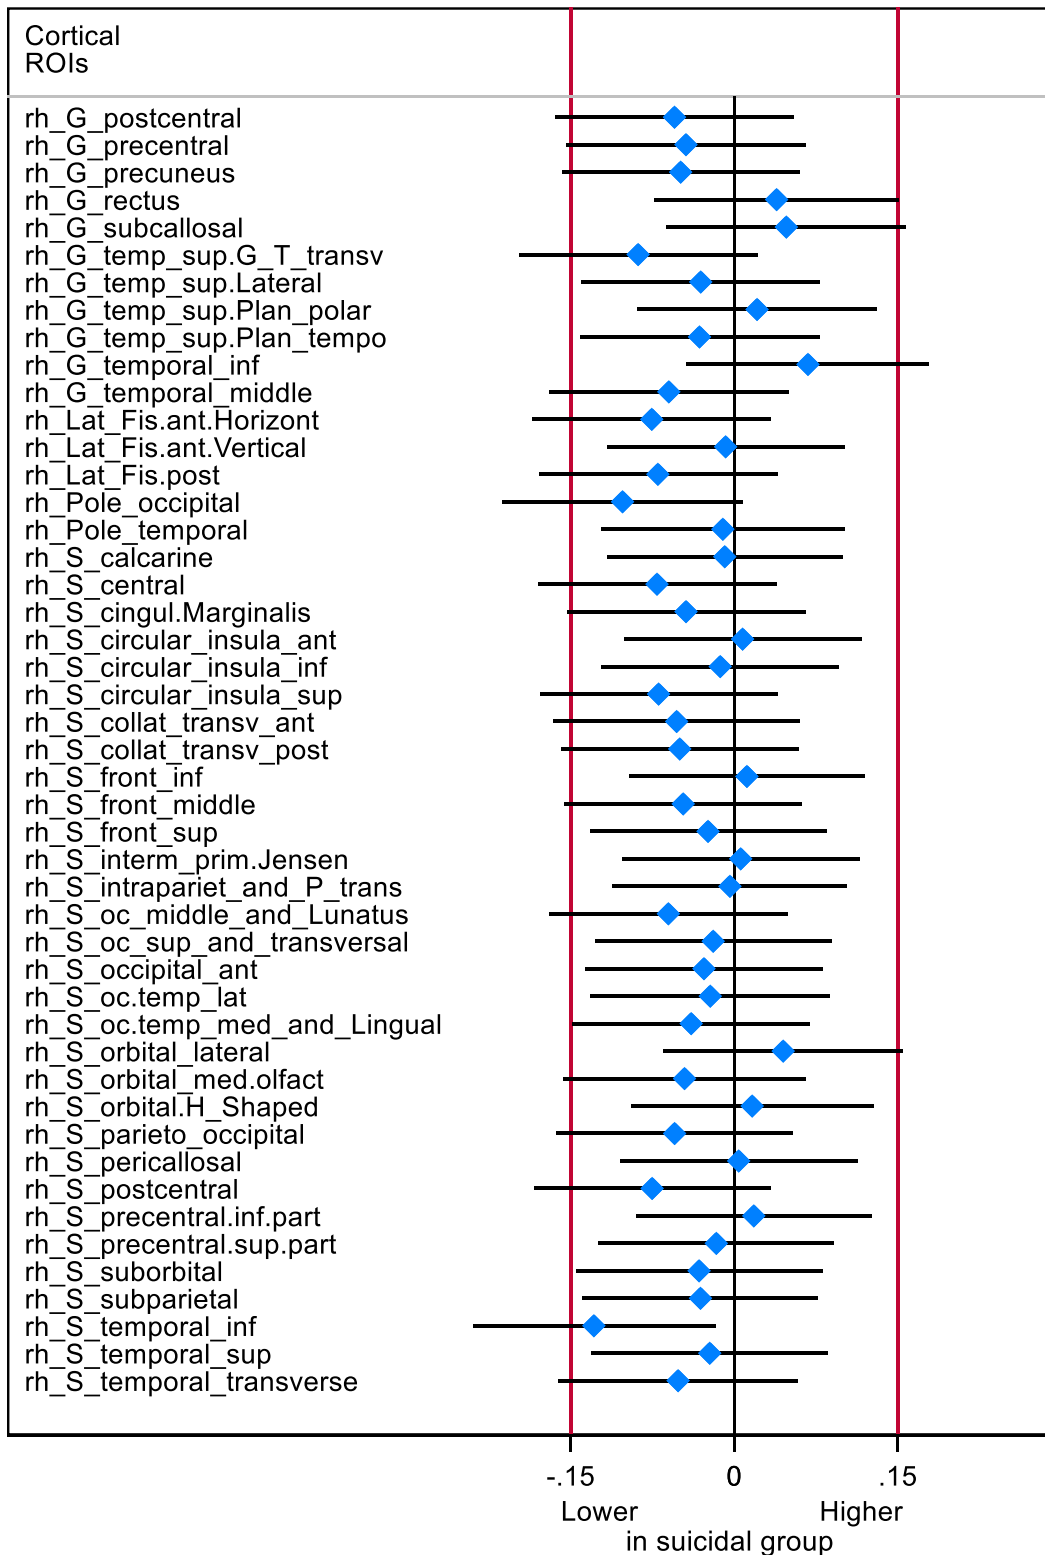

**eFigure 25 (3 of 3).** Results of the Equivalence test for differences in functional activity in cortical regions between the never-suicidal group and the child-reported suicidality group for reward feedback. The figure shows the effect sizes and 95% confidence intervals of the difference against the interval of equivalence (-0.15 to 0.15).

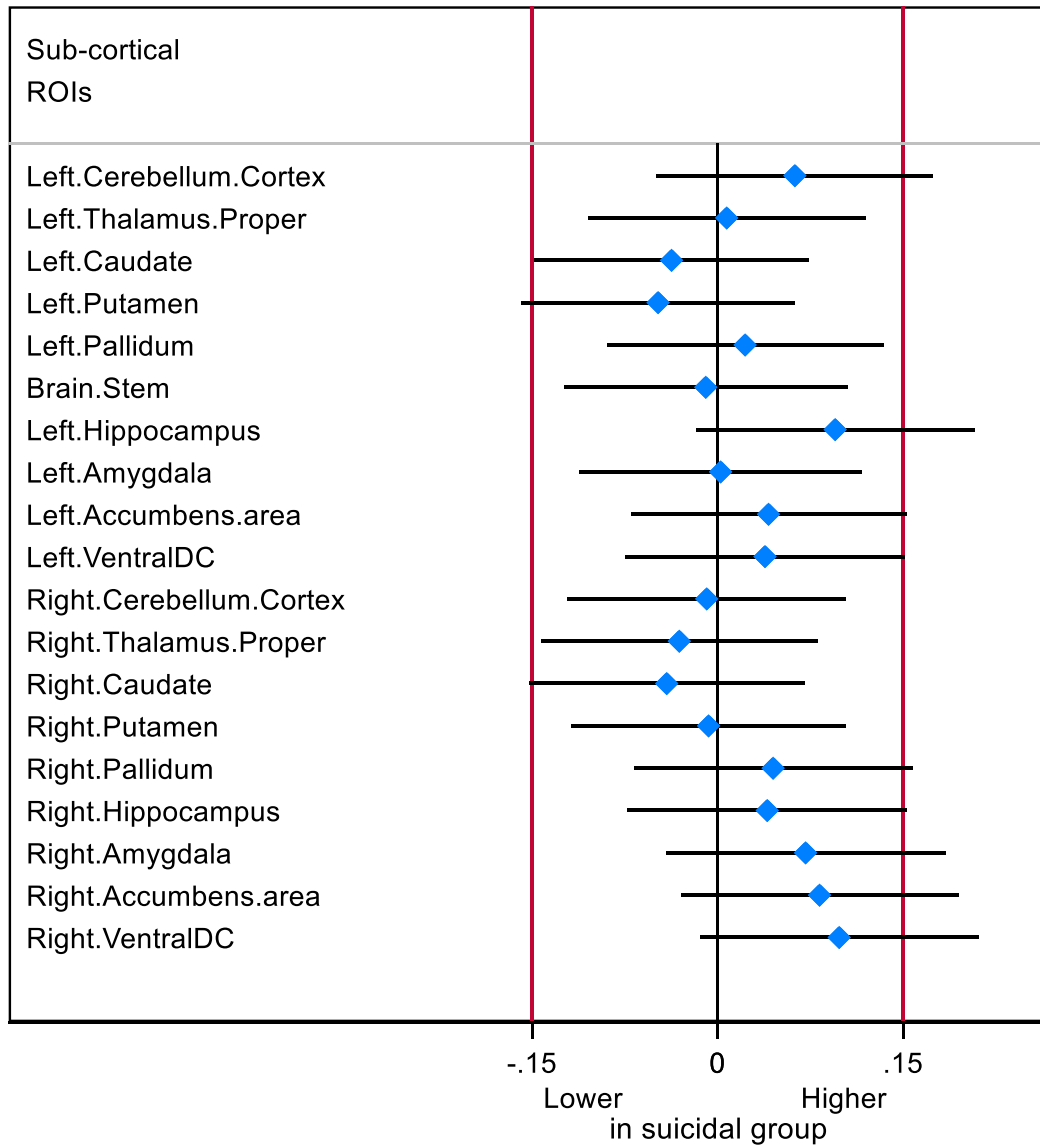

**eFigure 26.** Results of the Equivalence test for differences in functional activity in subcortical regions between the never-suicidal group and the caregiver-reported suicidality group for reward feedback. The figure shows the effect sizes and 95% confidence intervals of the difference against the interval of equivalence (-0.15 to 0.15).

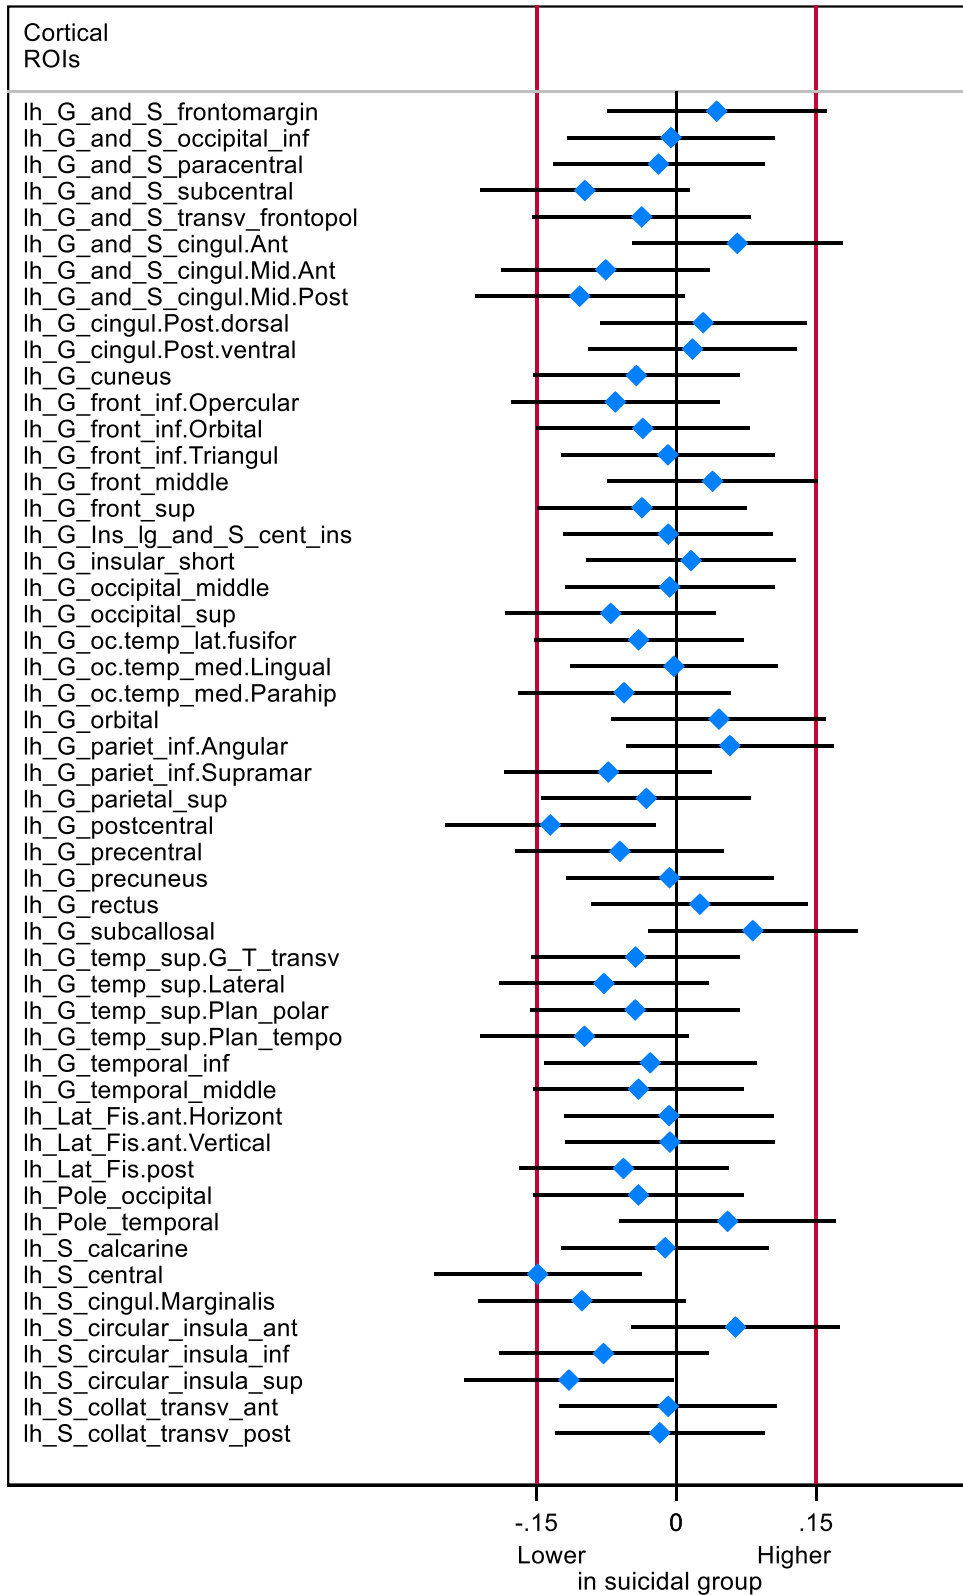

**eFigure 27 (1 of 3).** Results of the Equivalence test for differences in functional activity in cortical regions between the never-suicidal group and the caregiver-reported suicidality group for reward feedback. The figure shows the effect sizes and 95% confidence intervals of the difference against the interval of equivalence (-0.15 to 0.15).

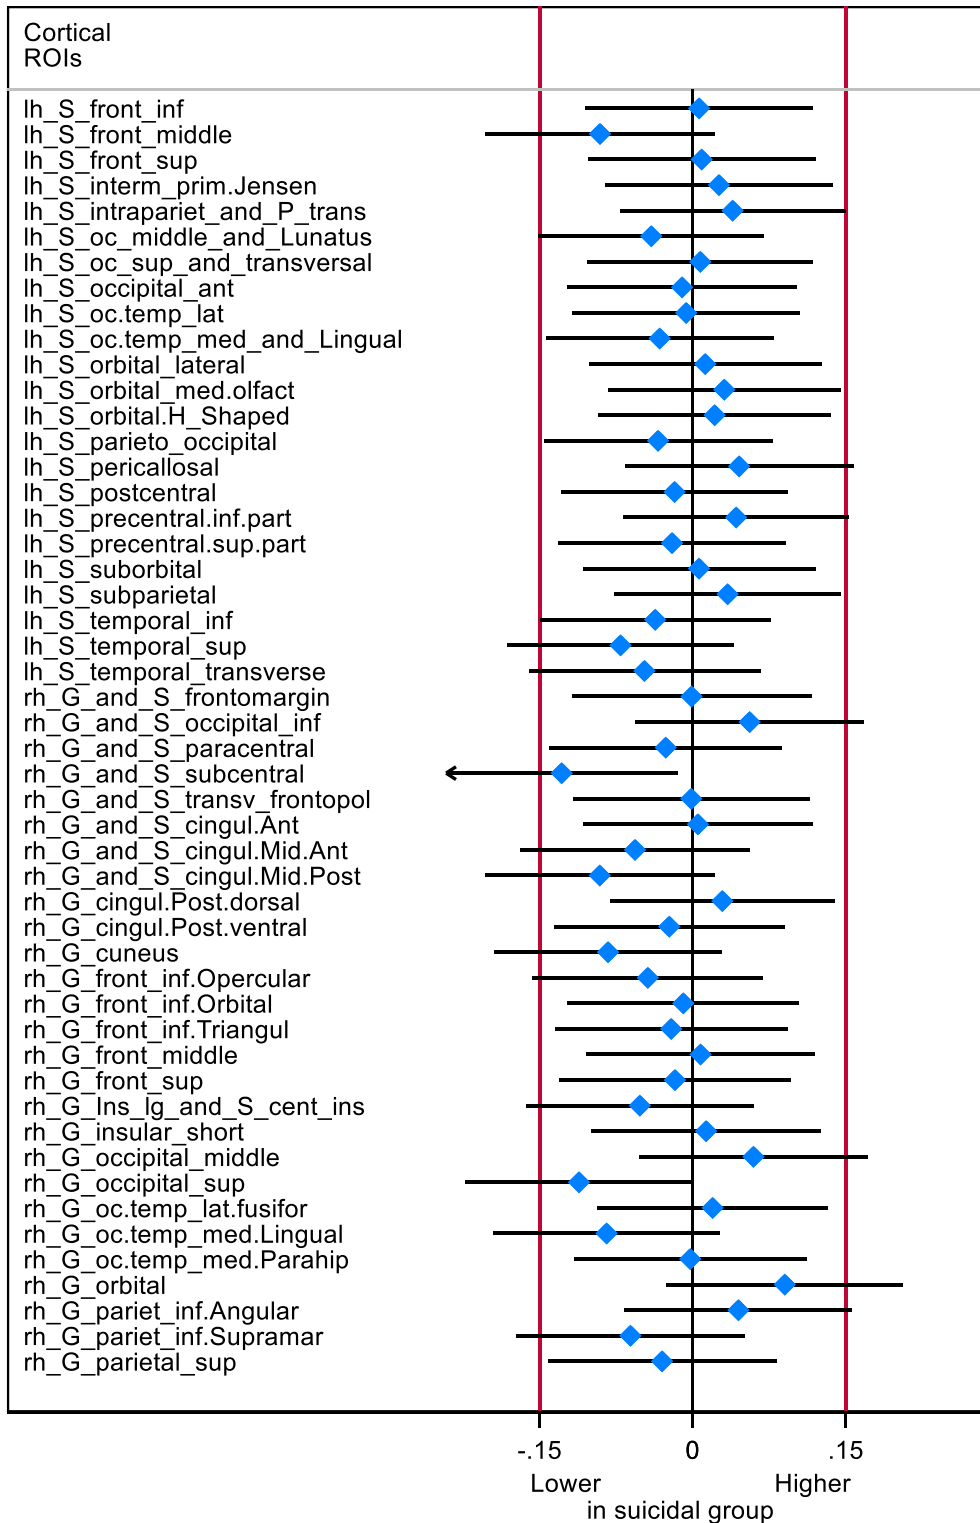

**eFigure 27 (2 of 3).** Results of the Equivalence test for differences in functional activity in cortical regions between the never-suicidal group and the caregiver-reported suicidality group for reward feedback. The figure shows the effect sizes and 95% confidence intervals of the difference against the interval of equivalence (-0.15 to 0.15).



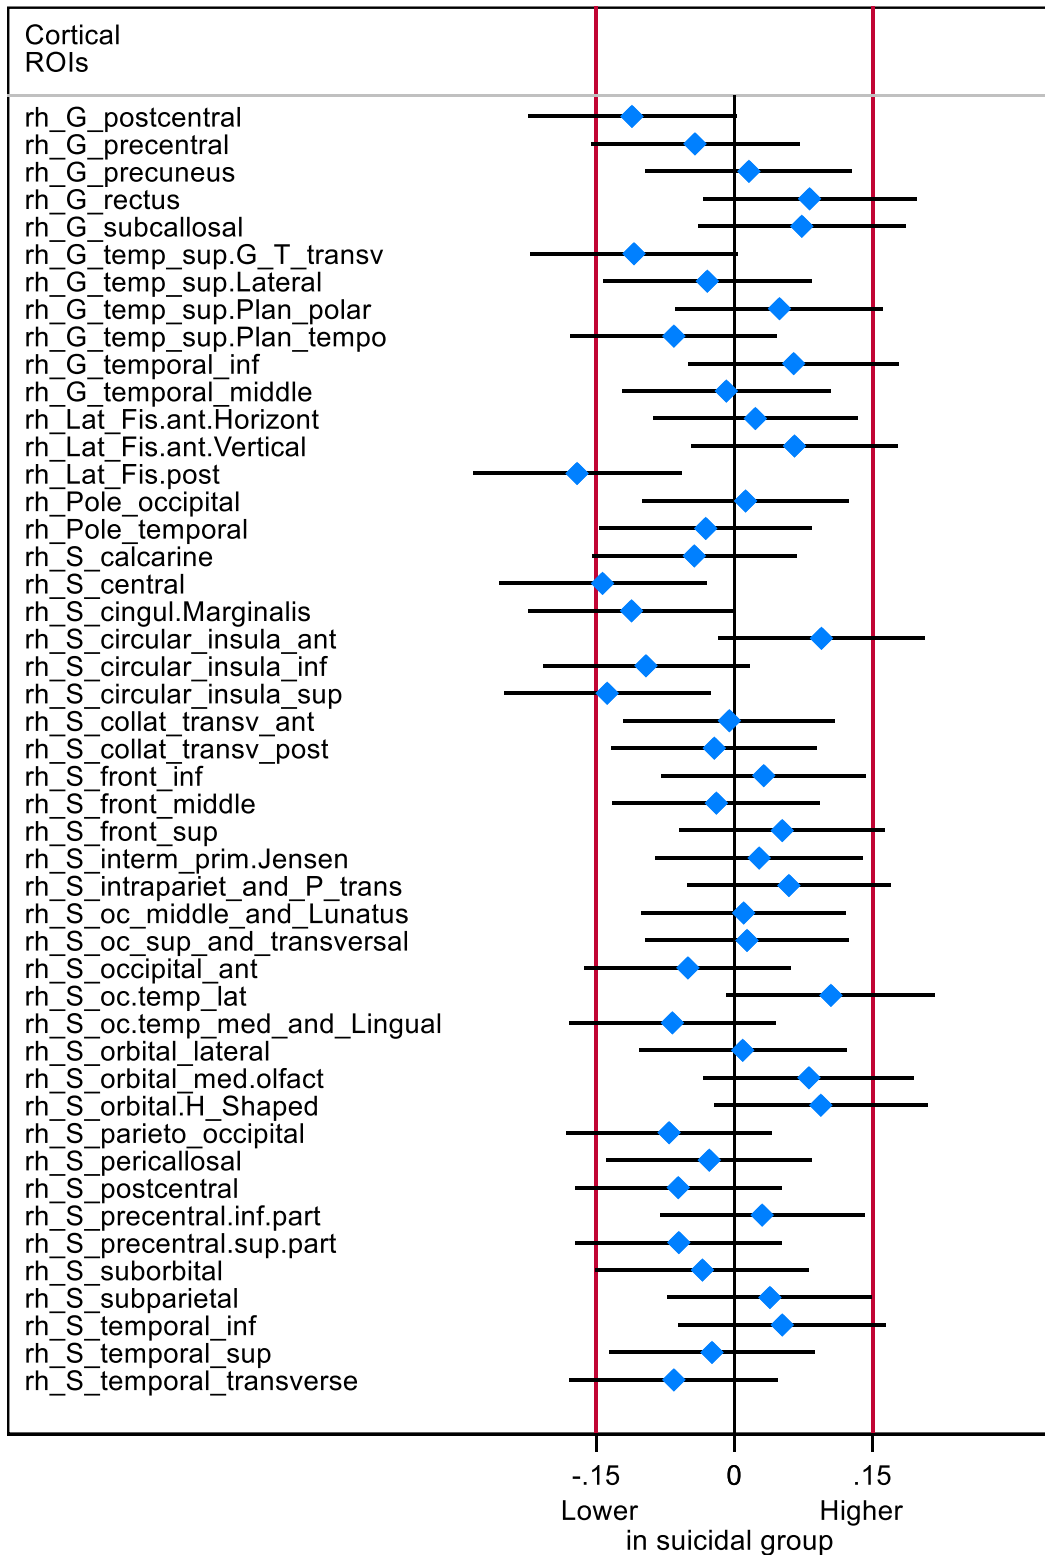

**eFigure 27 (3 of 3).** Results of the Equivalence test for differences in functional activity in cortical regions between the never-suicidal group and the caregiver-reported suicidality group for reward feedback. The figure shows the effect sizes and 95% confidence intervals of the difference against the interval of equivalence (-0.15 to 0.15).

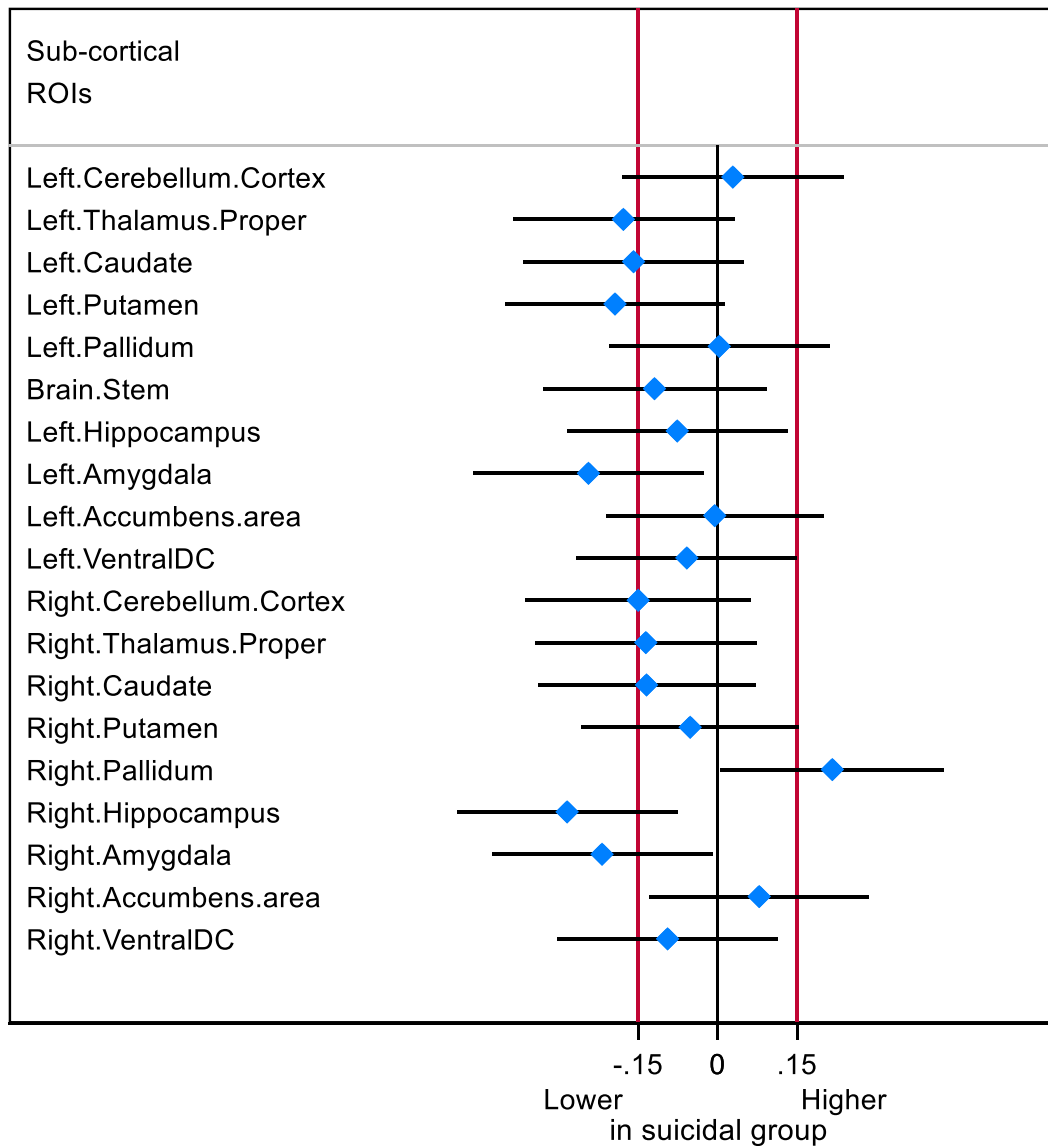

**eFigure 28.** Results of the Equivalence test for differences in functional activity in subcortical regions between the never-suicidal group and the concordantly-reported suicidality group for reward feedback. The figure shows the effect sizes and 95% confidence intervals of the difference against the interval of equivalence (-0.15 to 0.15).

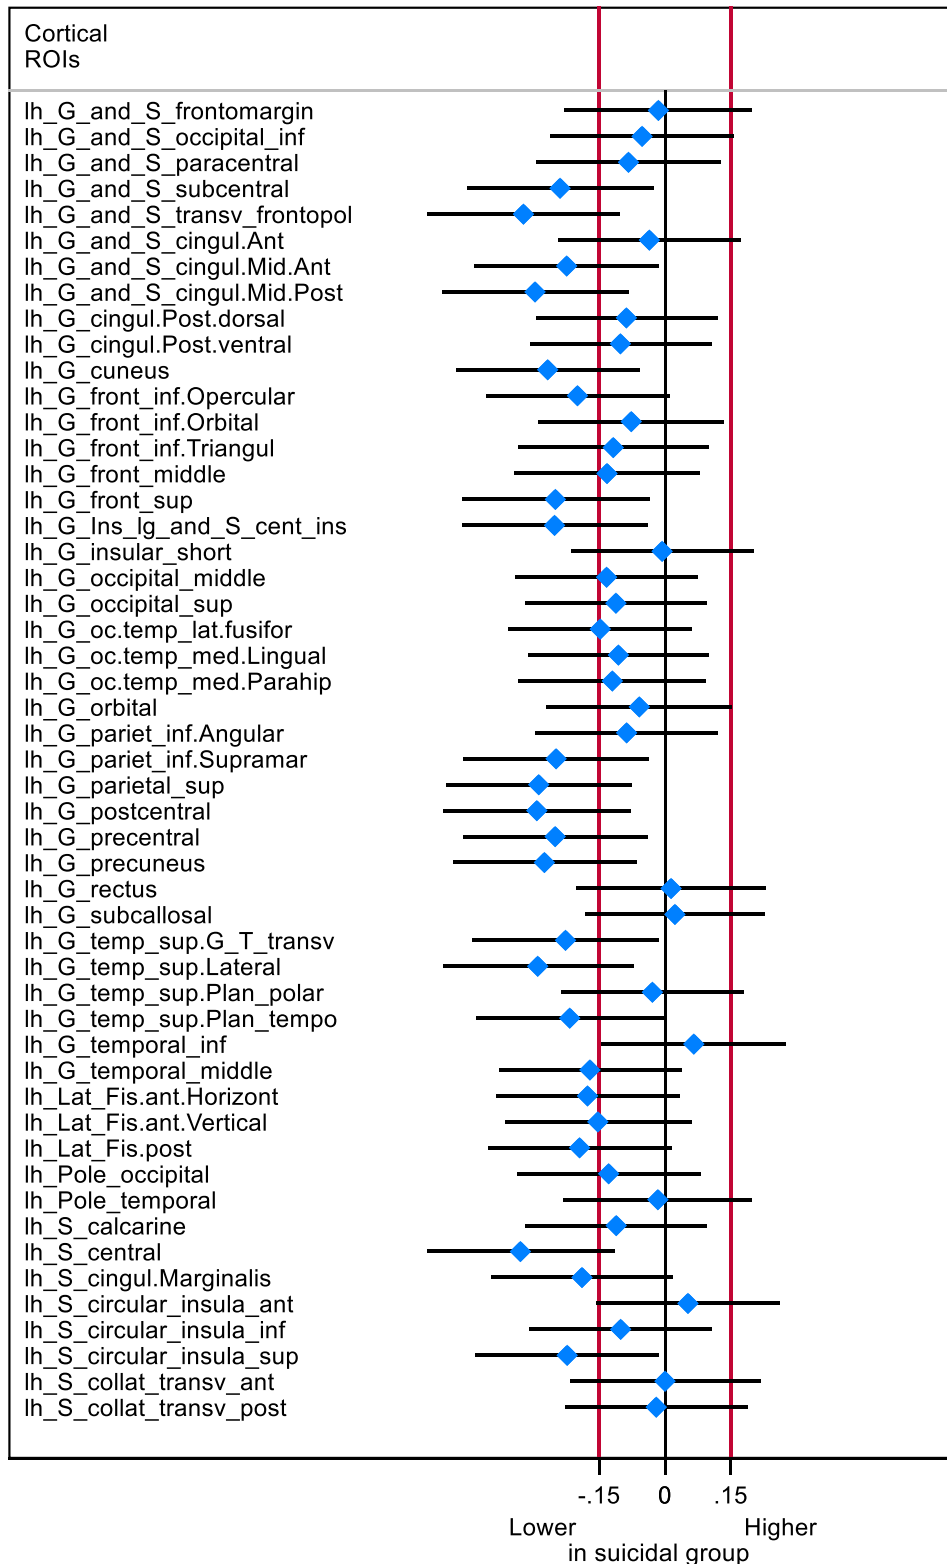

**eFigure 29 (1 of 3).** Results of the Equivalence test for differences in functional activity in cortical regions between the never-suicidal group and the concordantly-reported suicidality group for reward feedback. The figure shows the effect sizes and 95% confidence intervals of the difference against the interval of equivalence (-0.15 to 0.15).

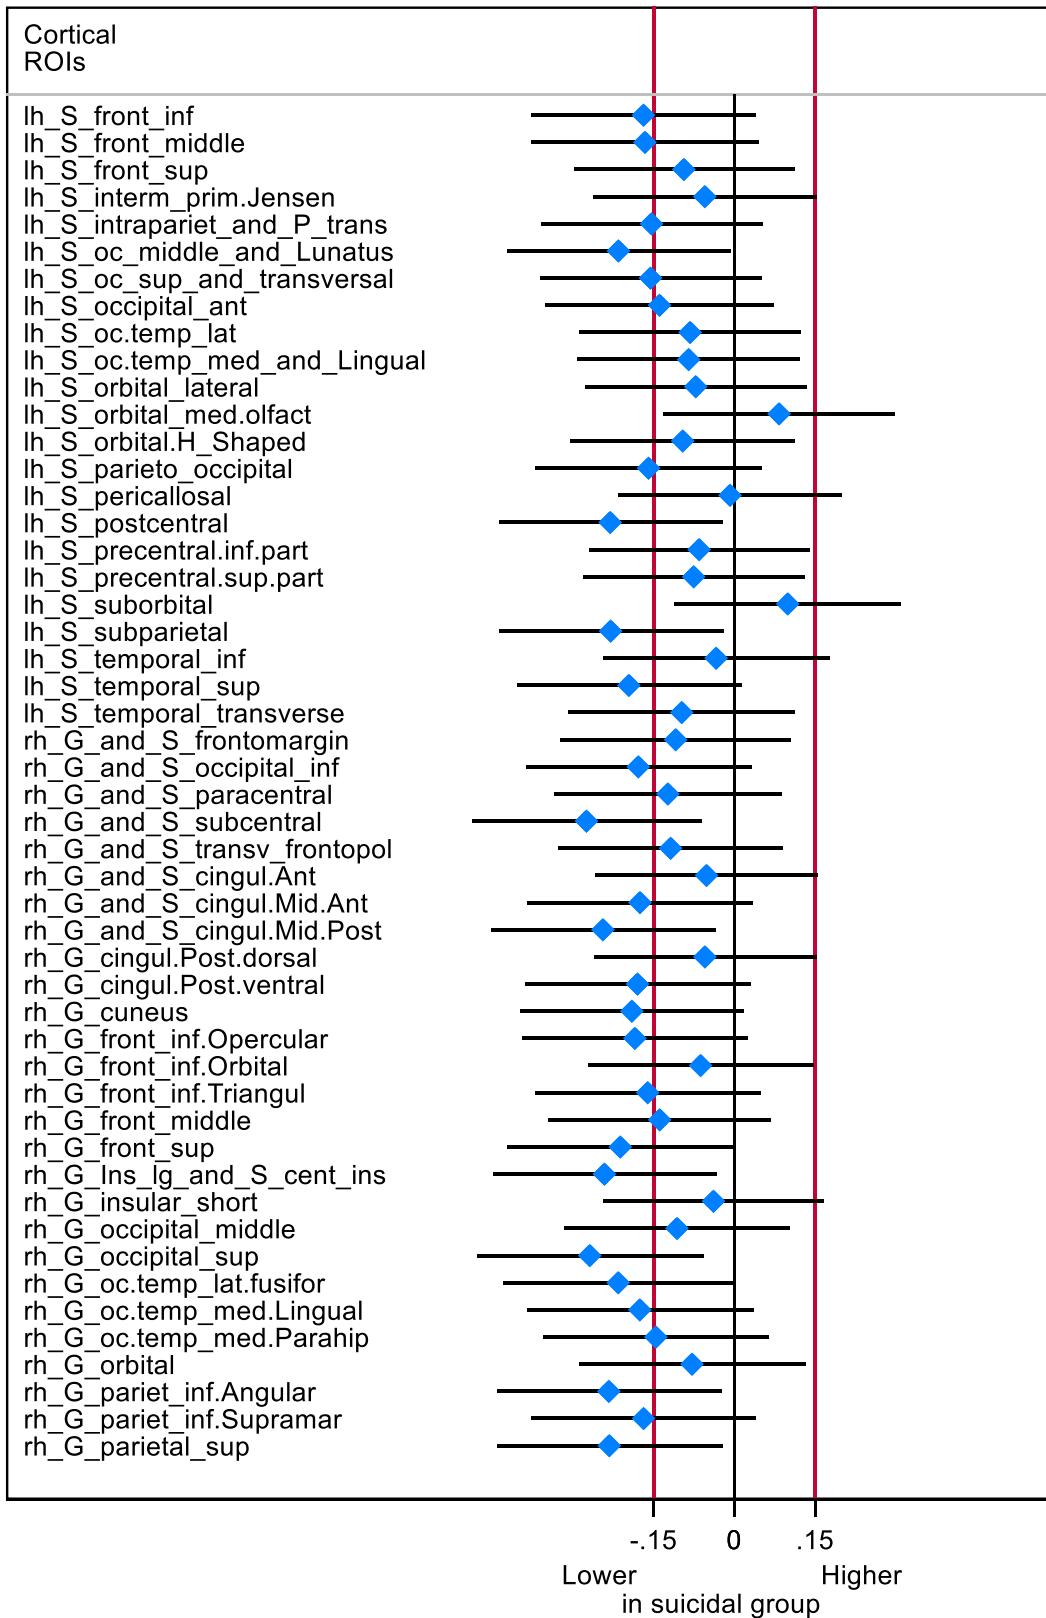

**eFigure 29 (2 of 3).** Results of the Equivalence test for differences in functional activity in cortical regions between the never-suicidal group and the concordantly-reported suicidality group for reward feedback. The figure shows the effect sizes and 95% confidence intervals of the difference against the interval of equivalence (-0.15 to 0.15).

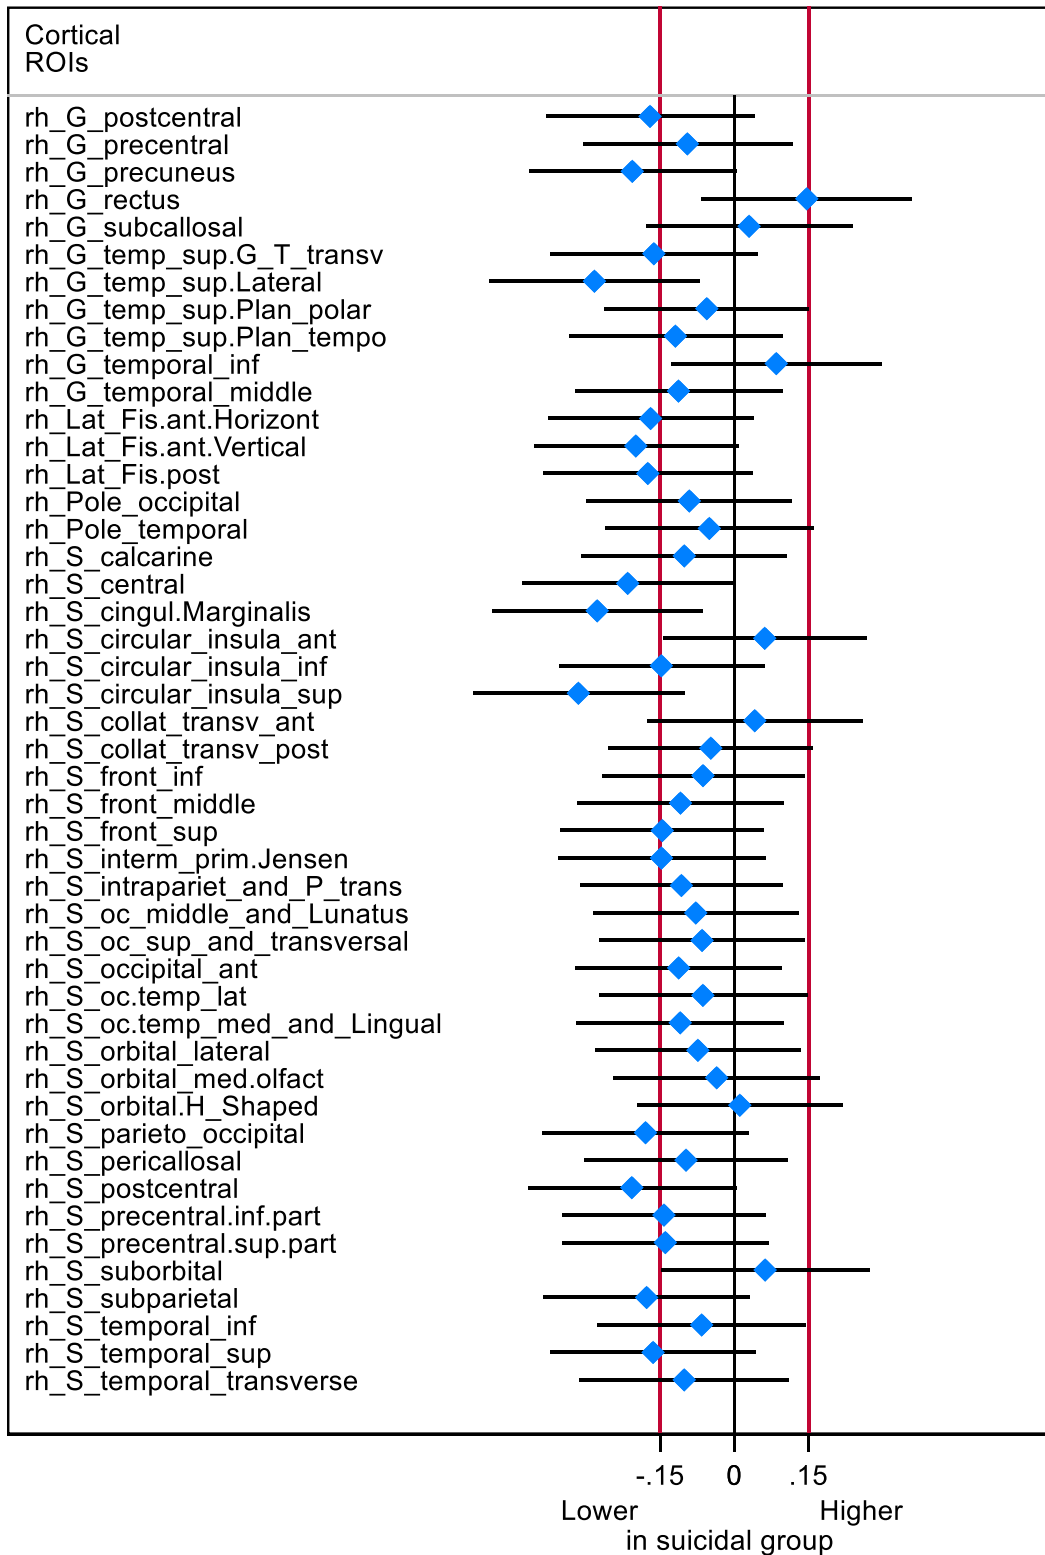

**eFigure 29 (3 of 3).** Results of the Equivalence test for differences in functional activity in cortical regions between the never-suicidal group and the concordantly-reported suicidality group for reward feedback. The figure shows the effect sizes and 95% confidence intervals of the difference against the interval of equivalence (-0.15 to 0.15).

**Positive vs negative feedback of loss**

| <b>eTable 20. Differences in functional activity between the never-suicidal group and the child-reported suicidality group for loss feedback: Welch's t-test</b> |             |               |          |                |              |
|------------------------------------------------------------------------------------------------------------------------------------------------------------------|-------------|---------------|----------|----------------|--------------|
| <b>ROIs</b>                                                                                                                                                      | <b>Mean</b> | <b>95%CI</b>  | <b>t</b> | <b>p (unc)</b> | <b>p FDR</b> |
| <b>Subcortical regions</b>                                                                                                                                       |             |               |          |                |              |
| Left.Cerebellum.Cortex                                                                                                                                           | 0.007       | -0.024, 0.037 | 0.43     | 0.669          | 0.996        |
| Left.Thalamus.Proper                                                                                                                                             | -0.005      | -0.02, 0.011  | -0.58    | 0.564          | 0.996        |
| Left.Caudate                                                                                                                                                     | -0.014      | -0.037, 0.009 | -1.20    | 0.232          | 0.996        |
| Left.Putamen                                                                                                                                                     | -0.012      | -0.031, 0.007 | -1.24    | 0.214          | 0.996        |
| Left.Pallidum                                                                                                                                                    | -0.008      | -0.025, 0.009 | -0.95    | 0.342          | 0.996        |
| Brain.Stem                                                                                                                                                       | 0.001       | -0.018, 0.02  | 0.08     | 0.937          | 0.996        |
| Left.Hippocampus                                                                                                                                                 | 0.014       | -0.003, 0.03  | 1.64     | 0.101          | 0.996        |
| Left.Amygdala                                                                                                                                                    | 0.000       | -0.021, 0.02  | -0.02    | 0.984          | 0.996        |
| Left.Accumbens.area                                                                                                                                              | -0.002      | -0.028, 0.024 | -0.15    | 0.879          | 0.996        |
| Left.VentralDC                                                                                                                                                   | 0.002       | -0.018, 0.021 | 0.18     | 0.854          | 0.996        |
| Right.Cerebellum.Cortex                                                                                                                                          | -0.005      | -0.034, 0.024 | -0.36    | 0.721          | 0.996        |
| Right.Thalamus.Proper                                                                                                                                            | -0.001      | -0.017, 0.015 | -0.12    | 0.907          | 0.996        |
| Right.Caudate                                                                                                                                                    | -0.006      | -0.029, 0.018 | -0.48    | 0.630          | 0.996        |
| Right.Putamen                                                                                                                                                    | -0.011      | -0.031, 0.009 | -1.07    | 0.284          | 0.996        |
| Right.Pallidum                                                                                                                                                   | 0.001       | -0.016, 0.018 | 0.13     | 0.900          | 0.996        |
| Right.Hippocampus                                                                                                                                                | 0.007       | -0.01, 0.024  | 0.78     | 0.434          | 0.996        |
| Right.Amygdala                                                                                                                                                   | 0.004       | -0.018, 0.025 | 0.35     | 0.726          | 0.996        |
| Right.Accumbens.area                                                                                                                                             | 0.001       | -0.023, 0.025 | 0.08     | 0.937          | 0.996        |
| Right.VentralDC                                                                                                                                                  | 0.007       | -0.024, 0.037 | 0.43     | 0.669          | 0.996        |
| <b>Cortical regions</b>                                                                                                                                          |             |               |          |                |              |
| lh_G_and_S_frontomargin                                                                                                                                          | -0.002      | -0.022, 0.017 | -0.24    | 0.811          | 0.996        |
| lh_G_and_S_occipital_inf                                                                                                                                         | -0.033      | -0.074, 0.008 | -1.56    | 0.119          | 0.996        |
| lh_G_and_S_paracentral                                                                                                                                           | 0.012       | -0.018, 0.041 | 0.77     | 0.442          | 0.996        |
| lh_G_and_S_subcentral                                                                                                                                            | -0.016      | -0.037, 0.004 | -1.55    | 0.121          | 0.996        |
| lh_G_and_S_transv_frontopol                                                                                                                                      | -0.016      | -0.038, 0.006 | -1.45    | 0.149          | 0.996        |
| lh_G_and_S_cingul.Ant                                                                                                                                            | 0.025       | -0.017, 0.067 | 1.18     | 0.240          | 0.996        |
| lh_G_and_S_cingul.Mid.Ant                                                                                                                                        | 0.017       | -0.004, 0.039 | 1.59     | 0.113          | 0.996        |
| lh_G_and_S_cingul.Mid.Post                                                                                                                                       | 0.004       | -0.014, 0.022 | 0.45     | 0.655          | 0.996        |
| lh_G_cingul.Post.dorsal                                                                                                                                          | 0.002       | -0.015, 0.018 | 0.19     | 0.849          | 0.996        |
| lh_G_cingul.Post.ventral                                                                                                                                         | -0.003      | -0.024, 0.018 | -0.33    | 0.744          | 0.996        |
| lh_G_cuneus                                                                                                                                                      | -0.013      | -0.055, 0.029 | -0.63    | 0.531          | 0.996        |
| lh_G_front_inf.Opercular                                                                                                                                         | -0.005      | -0.036, 0.025 | -0.33    | 0.738          | 0.996        |
| lh_G_front_inf.Orbital                                                                                                                                           | -0.009      | -0.029, 0.01  | -0.94    | 0.346          | 0.996        |
| lh_G_front_inf.Triangul                                                                                                                                          | -0.021      | -0.054, 0.012 | -1.26    | 0.207          | 0.996        |
| lh_G_front_middle                                                                                                                                                | 0.000       | -0.026, 0.027 | 0.01     | 0.989          | 0.996        |
| lh_G_front_sup                                                                                                                                                   | -0.002      | -0.022, 0.019 | -0.17    | 0.861          | 0.996        |
| lh_G_Ins_lg_and_S_cent_ins                                                                                                                                       | 0.000       | -0.015, 0.015 | 0.00     | 0.996          | 0.996        |
| lh_G_insular_short                                                                                                                                               | -0.004      | -0.023, 0.015 | -0.44    | 0.659          | 0.996        |

**eTable 20. Differences in functional activity between the never-suicidal group and the child-reported suicidality group for loss feedback: Welch's t-test**

| ROIs                         | Mean   | 95%CI         | t     | p (unc) | p FDR |
|------------------------------|--------|---------------|-------|---------|-------|
| lh_G_occipital_middle        | 0.006  | -0.01, 0.023  | 0.75  | 0.456   | 0.996 |
| lh_G_occipital_sup           | -0.007 | -0.029, 0.015 | -0.63 | 0.529   | 0.996 |
| lh_G_oc.temp_lat.fusifor     | -0.015 | -0.04, 0.009  | -1.26 | 0.210   | 0.996 |
| lh_G_oc.temp_med.Lingual     | 0.006  | -0.018, 0.03  | 0.52  | 0.600   | 0.996 |
| lh_G_oc.temp_med.Parahip     | -0.009 | -0.042, 0.024 | -0.52 | 0.607   | 0.996 |
| lh_G_orbital                 | 0.011  | -0.014, 0.036 | 0.87  | 0.383   | 0.996 |
| lh_G_pariet_inf.Angular      | -0.016 | -0.052, 0.021 | -0.85 | 0.394   | 0.996 |
| lh_G_pariet_inf.Supramar     | 0.012  | -0.009, 0.033 | 1.16  | 0.246   | 0.996 |
| lh_G_parietal_sup            | -0.002 | -0.02, 0.015  | -0.28 | 0.780   | 0.996 |
| lh_G_postcentral             | 0.007  | -0.012, 0.025 | 0.72  | 0.474   | 0.996 |
| lh_G_precentral              | -0.009 | -0.029, 0.012 | -0.83 | 0.406   | 0.996 |
| lh_G_precuneus               | 0.000  | -0.016, 0.015 | -0.03 | 0.972   | 0.996 |
| lh_G_rectus                  | -0.001 | -0.02, 0.019  | -0.09 | 0.930   | 0.996 |
| lh_G_subcallosal             | -0.003 | -0.072, 0.066 | -0.09 | 0.926   | 0.996 |
| lh_G_temp_sup.G_T_transv     | -0.004 | -0.041, 0.032 | -0.23 | 0.819   | 0.996 |
| lh_G_temp_sup.Lateral        | -0.007 | -0.028, 0.014 | -0.63 | 0.530   | 0.996 |
| lh_G_temp_sup.Plan_polar     | -0.005 | -0.022, 0.011 | -0.62 | 0.534   | 0.996 |
| lh_G_temp_sup.Plan_tempo     | -0.008 | -0.025, 0.009 | -0.98 | 0.330   | 0.996 |
| lh_G_temporal_inf            | -0.014 | -0.035, 0.007 | -1.33 | 0.185   | 0.996 |
| lh_G_temporal_middle         | 0.007  | -0.024, 0.039 | 0.45  | 0.654   | 0.996 |
| lh_Lat_Fis.ant.Horizontal    | 0.021  | -0.001, 0.044 | 1.84  | 0.066   | 0.996 |
| lh_Lat_Fis.ant.Vertical      | -0.012 | -0.039, 0.015 | -0.86 | 0.391   | 0.996 |
| lh_Lat_Fis.post              | -0.001 | -0.032, 0.03  | -0.06 | 0.951   | 0.996 |
| lh_Pole_occipital            | -0.002 | -0.024, 0.019 | -0.21 | 0.837   | 0.996 |
| lh_Pole_temporal             | -0.004 | -0.045, 0.038 | -0.17 | 0.863   | 0.996 |
| lh_S_calcarine               | 0.000  | -0.029, 0.028 | -0.01 | 0.996   | 0.996 |
| lh_S_central                 | -0.007 | -0.035, 0.022 | -0.45 | 0.653   | 0.996 |
| lh_S_cingul.Marginalis       | -0.012 | -0.035, 0.011 | -1.03 | 0.304   | 0.996 |
| lh_S_circular_insula_ant     | 0.003  | -0.015, 0.021 | 0.30  | 0.766   | 0.996 |
| lh_S_circular_insula_inf     | 0.005  | -0.017, 0.028 | 0.46  | 0.647   | 0.996 |
| lh_S_circular_insula_sup     | 0.011  | -0.006, 0.028 | 1.30  | 0.195   | 0.996 |
| lh_S_collat_transv_ant       | -0.005 | -0.024, 0.015 | -0.48 | 0.632   | 0.996 |
| lh_S_collat_transv_post      | -0.017 | -0.049, 0.016 | -1.00 | 0.317   | 0.996 |
| lh_S_front_inf               | -0.011 | -0.037, 0.015 | -0.82 | 0.414   | 0.996 |
| lh_S_front_middle            | -0.003 | -0.026, 0.02  | -0.26 | 0.795   | 0.996 |
| lh_S_front_sup               | -0.006 | -0.029, 0.018 | -0.47 | 0.637   | 0.996 |
| lh_S_interm_prim.Jensen      | -0.001 | -0.018, 0.016 | -0.09 | 0.928   | 0.996 |
| lh_S_intrapariet_and_P_trans | 0.007  | -0.018, 0.032 | 0.55  | 0.586   | 0.996 |
| lh_S_oc_middle_and_Lunatus   | 0.008  | -0.012, 0.028 | 0.81  | 0.416   | 0.996 |
| lh_S_oc_sup_and_transversal  | -0.004 | -0.03, 0.023  | -0.26 | 0.796   | 0.996 |
| lh_S_occipital_ant           | 0.005  | -0.018, 0.027 | 0.43  | 0.669   | 0.996 |
| lh_S_oc.temp_lat             | 0.004  | -0.016, 0.023 | 0.35  | 0.730   | 0.996 |
| lh_S_oc.temp_med_and_Lingual | 0.004  | -0.015, 0.022 | 0.39  | 0.699   | 0.996 |

**eTable 20. Differences in functional activity between the never-suicidal group and the child-reported suicidality group for loss feedback: Welch's t-test**

| ROIs                        | Mean   | 95%CI          | t     | p (unc)      | p FDR |
|-----------------------------|--------|----------------|-------|--------------|-------|
| lh_S_orbital_lateral        | 0.003  | -0.016, 0.022  | 0.30  | 0.762        | 0.996 |
| lh_S_orbital_med.olfact     | -0.012 | -0.048, 0.025  | -0.62 | 0.535        | 0.996 |
| lh_S_orbital.H_Shaped       | 0.030  | -0.031, 0.09   | 0.96  | 0.339        | 0.996 |
| lh_S_parieto_occipital      | -0.004 | -0.032, 0.025  | -0.27 | 0.791        | 0.996 |
| lh_S_pericallosal           | -0.008 | -0.028, 0.012  | -0.82 | 0.414        | 0.996 |
| lh_S_postcentral            | -0.009 | -0.033, 0.014  | -0.80 | 0.425        | 0.996 |
| lh_S_precentral.inf.part    | -0.014 | -0.031, 0.003  | -1.58 | 0.115        | 0.996 |
| lh_S_precentral.sup.part    | 0.004  | -0.018, 0.026  | 0.35  | 0.728        | 0.996 |
| lh_S_suborbital             | -0.002 | -0.019, 0.015  | -0.21 | 0.830        | 0.996 |
| lh_S_subparietal            | 0.036  | -0.013, 0.084  | 1.43  | 0.152        | 0.996 |
| lh_S_temporal_inf           | 0.006  | -0.017, 0.029  | 0.50  | 0.615        | 0.996 |
| lh_S_temporal_sup           | 0.008  | -0.023, 0.04   | 0.53  | 0.596        | 0.996 |
| lh_S_temporal_transverse    | 0.004  | -0.014, 0.021  | 0.43  | 0.671        | 0.996 |
| rh_G_and_S_frontomargin     | -0.034 | -0.063, -0.004 | -2.25 | <b>0.025</b> | 0.996 |
| rh_G_and_S_occipital_inf    | -0.035 | -0.083, 0.013  | -1.43 | 0.152        | 0.996 |
| rh_G_and_S_paracentral      | 0.014  | -0.016, 0.044  | 0.91  | 0.362        | 0.996 |
| rh_G_and_S_subcentral       | -0.001 | -0.024, 0.022  | -0.06 | 0.949        | 0.996 |
| rh_G_and_S_transv_frontopol | -0.013 | -0.035, 0.01   | -1.08 | 0.279        | 0.996 |
| rh_G_and_S_cingul.Ant       | -0.003 | -0.036, 0.03   | -0.19 | 0.852        | 0.996 |
| rh_G_and_S_cingul.Mid.Ant   | 0.006  | -0.016, 0.028  | 0.52  | 0.605        | 0.996 |
| rh_G_and_S_cingul.Mid.Post  | -0.006 | -0.025, 0.012  | -0.68 | 0.495        | 0.996 |
| rh_G_cingul.Post.dorsal     | 0.005  | -0.011, 0.021  | 0.60  | 0.551        | 0.996 |
| rh_G_cingul.Post.ventral    | -0.002 | -0.022, 0.018  | -0.21 | 0.833        | 0.996 |
| rh_G_cuneus                 | -0.003 | -0.037, 0.031  | -0.18 | 0.858        | 0.996 |
| rh_G_front_inf.Opercular    | -0.011 | -0.04, 0.018   | -0.71 | 0.475        | 0.996 |
| rh_G_front_inf.Orbital      | -0.001 | -0.021, 0.019  | -0.10 | 0.922        | 0.996 |
| rh_G_front_inf.Triangul     | -0.024 | -0.055, 0.007  | -1.50 | 0.134        | 0.996 |
| rh_G_front_middle           | -0.011 | -0.035, 0.013  | -0.93 | 0.353        | 0.996 |
| rh_G_front_sup              | -0.002 | -0.024, 0.02   | -0.18 | 0.854        | 0.996 |
| rh_G_Ins_lg_and_S_cent_ins  | 0.001  | -0.015, 0.016  | 0.09  | 0.926        | 0.996 |
| rh_G_insular_short          | 0.007  | -0.014, 0.029  | 0.66  | 0.508        | 0.996 |
| rh_G_occipital_middle       | 0.003  | -0.015, 0.021  | 0.32  | 0.748        | 0.996 |
| rh_G_occipital_sup          | 0.012  | -0.009, 0.034  | 1.12  | 0.263        | 0.996 |
| rh_G_oc.temp_lat.fusifor    | 0.000  | -0.024, 0.023  | -0.04 | 0.968        | 0.996 |
| rh_G_oc.temp_med.Lingual    | 0.006  | -0.019, 0.032  | 0.49  | 0.627        | 0.996 |
| rh_G_oc.temp_med.Parahip    | -0.007 | -0.037, 0.024  | -0.42 | 0.674        | 0.996 |
| rh_G_orbital                | -0.011 | -0.038, 0.016  | -0.81 | 0.421        | 0.996 |
| rh_G_pariet_inf.Angular     | -0.021 | -0.06, 0.017   | -1.11 | 0.268        | 0.996 |
| rh_G_pariet_inf.Supramar    | 0.002  | -0.017, 0.021  | 0.19  | 0.848        | 0.996 |
| rh_G_parietal_sup           | -0.009 | -0.026, 0.009  | -0.98 | 0.329        | 0.996 |
| rh_G_postcentral            | 0.003  | -0.015, 0.022  | 0.34  | 0.737        | 0.996 |
| rh_G_precentral             | 0.000  | -0.021, 0.021  | 0.03  | 0.979        | 0.996 |
| rh_G_precuneus              | -0.011 | -0.026, 0.004  | -1.44 | 0.150        | 0.996 |



**eTable 20. Differences in functional activity between the never-suicidal group and the child-reported suicidality group for loss feedback: Welch's t-test**

| ROIs                         | Mean   | 95%CI         | t     | p (unc) | p FDR |
|------------------------------|--------|---------------|-------|---------|-------|
| rh_G_rectus                  | 0.003  | -0.018, 0.023 | 0.25  | 0.805   | 0.996 |
| rh_G_subcallosal             | 0.064  | -0.021, 0.149 | 1.49  | 0.138   | 0.996 |
| rh_G_temp_sup.G_T_transv     | 0.006  | -0.028, 0.04  | 0.35  | 0.729   | 0.996 |
| rh_G_temp_sup.Lateral        | -0.004 | -0.026, 0.017 | -0.41 | 0.682   | 0.996 |
| rh_G_temp_sup.Plan_polar     | -0.004 | -0.02, 0.012  | -0.53 | 0.599   | 0.996 |
| rh_G_temp_sup.Plan_tempo     | -0.005 | -0.02, 0.011  | -0.58 | 0.563   | 0.996 |
| rh_G_temporal_inf            | -0.003 | -0.024, 0.019 | -0.24 | 0.814   | 0.996 |
| rh_G_temporal_middle         | -0.012 | -0.047, 0.022 | -0.71 | 0.475   | 0.996 |
| rh_Lat_Fis.ant.Horizontal    | 0.000  | -0.021, 0.022 | 0.02  | 0.981   | 0.996 |
| rh_Lat_Fis.ant.Vertical      | -0.011 | -0.036, 0.015 | -0.81 | 0.418   | 0.996 |
| rh_Lat_Fis.post              | 0.006  | -0.028, 0.04  | 0.36  | 0.722   | 0.996 |
| rh_Pole_occipital            | -0.001 | -0.024, 0.023 | -0.06 | 0.948   | 0.996 |
| rh_Pole_temporal             | 0.008  | -0.033, 0.048 | 0.37  | 0.714   | 0.996 |
| rh_S_calcarine               | -0.028 | -0.061, 0.005 | -1.66 | 0.098   | 0.996 |
| rh_S_central                 | -0.011 | -0.041, 0.019 | -0.72 | 0.472   | 0.996 |
| rh_S_cingul.Marginalis       | -0.007 | -0.031, 0.017 | -0.56 | 0.573   | 0.996 |
| rh_S_circular_insula_ant     | 0.001  | -0.017, 0.018 | 0.07  | 0.942   | 0.996 |
| rh_S_circular_insula_inf     | 0.006  | -0.017, 0.029 | 0.51  | 0.613   | 0.996 |
| rh_S_circular_insula_sup     | 0.009  | -0.009, 0.027 | 0.94  | 0.347   | 0.996 |
| rh_S_collat_transv_ant       | -0.006 | -0.026, 0.015 | -0.54 | 0.591   | 0.996 |
| rh_S_collat_transv_post      | -0.022 | -0.057, 0.012 | -1.26 | 0.207   | 0.996 |
| rh_S_front_inf               | 0.008  | -0.018, 0.034 | 0.59  | 0.555   | 0.996 |
| rh_S_front_middle            | 0.005  | -0.019, 0.028 | 0.40  | 0.689   | 0.996 |
| rh_S_front_sup               | -0.001 | -0.025, 0.022 | -0.09 | 0.929   | 0.996 |
| rh_S_interm_prim.Jensen      | 0.006  | -0.012, 0.023 | 0.61  | 0.543   | 0.996 |
| rh_S_intrapariet_and_P_trans | 0.007  | -0.016, 0.031 | 0.63  | 0.531   | 0.996 |
| rh_S_oc_middle_and_Lunatus   | -0.002 | -0.02, 0.017  | -0.20 | 0.844   | 0.996 |
| rh_S_oc_sup_and_transversal  | -0.001 | -0.027, 0.025 | -0.09 | 0.928   | 0.996 |
| rh_S_occipital_ant           | 0.003  | -0.018, 0.024 | 0.30  | 0.765   | 0.996 |
| rh_S_oc.temp_lat             | -0.011 | -0.031, 0.008 | -1.12 | 0.263   | 0.996 |
| rh_S_oc.temp_med_and_Lingual | 0.005  | -0.015, 0.024 | 0.47  | 0.636   | 0.996 |
| rh_S_orbital_lateral         | 0.013  | -0.006, 0.032 | 1.35  | 0.179   | 0.996 |
| rh_S_orbital_med.olfact      | -0.008 | -0.04, 0.023  | -0.52 | 0.606   | 0.996 |
| rh_S_orbital.H_Shaped        | -0.014 | -0.08, 0.052  | -0.41 | 0.681   | 0.996 |
| rh_S_parieto_occipital       | -0.008 | -0.037, 0.022 | -0.52 | 0.601   | 0.996 |
| rh_S_pericallosal            | 0.007  | -0.012, 0.027 | 0.73  | 0.465   | 0.996 |
| rh_S_postcentral             | 0.002  | -0.024, 0.027 | 0.13  | 0.899   | 0.996 |
| rh_S_precentral.inf.part     | -0.010 | -0.027, 0.007 | -1.10 | 0.273   | 0.996 |
| rh_S_precentral.sup.part     | 0.001  | -0.021, 0.023 | 0.06  | 0.948   | 0.996 |
| rh_S_suborbital              | -0.002 | -0.02, 0.015  | -0.28 | 0.780   | 0.996 |
| rh_S_subparietal             | 0.049  | -0.02, 0.118  | 1.41  | 0.161   | 0.996 |
| rh_S_temporal_inf            | -0.002 | -0.025, 0.02  | -0.21 | 0.831   | 0.996 |
| rh_S_temporal_sup            | 0.001  | -0.032, 0.034 | 0.07  | 0.948   | 0.996 |

**eTable 20. Differences in functional activity between the never-suicidal group and the child-reported suicidality group for loss feedback: Welch's t-test**

| ROIs                     | Mean  | 95%CI         | t    | p (unc) | p FDR |
|--------------------------|-------|---------------|------|---------|-------|
| rh_S_temporal_transverse | 0.009 | -0.008, 0.026 | 1.01 | 0.312   | 0.996 |

**Bold** denotes group differences at  $p < 0.05$  uncorrected

**eTable 21. Differences in functional activity between the never-suicidal group and the caregiver-reported suicidality group for loss feedback: Welch's t-test**

| ROIs                        | Mean   | 95%CI         | t     | p (unc) | p FDR |
|-----------------------------|--------|---------------|-------|---------|-------|
| <b>Subcortical regions</b>  |        |               |       |         |       |
| Left.Cerebellum.Cortex      | 0.021  | -0.011, 0.053 | 1.27  | 0.206   | 0.840 |
| Left.Thalamus.Proper        | 0.007  | -0.01, 0.024  | 0.83  | 0.407   | 0.840 |
| Left.Caudate                | 0.013  | -0.009, 0.035 | 1.14  | 0.257   | 0.840 |
| Left.Putamen                | 0.006  | -0.014, 0.026 | 0.59  | 0.558   | 0.840 |
| Left.Pallidum               | -0.001 | -0.019, 0.016 | -0.14 | 0.886   | 0.954 |
| Brain.Stem                  | 0.006  | -0.014, 0.027 | 0.60  | 0.550   | 0.840 |
| Left.Hippocampus            | 0.012  | -0.005, 0.029 | 1.37  | 0.172   | 0.840 |
| Left.Amygdala               | 0.008  | -0.014, 0.031 | 0.75  | 0.455   | 0.840 |
| Left.Accumbens.area         | 0.011  | -0.013, 0.035 | 0.88  | 0.377   | 0.840 |
| Left.VentralDC              | 0.009  | -0.012, 0.029 | 0.83  | 0.409   | 0.840 |
| Right.Cerebellum.Cortex     | 0.010  | -0.02, 0.041  | 0.66  | 0.508   | 0.840 |
| Right.Thalamus.Proper       | 0.016  | -0.001, 0.033 | 1.83  | 0.068   | 0.840 |
| Right.Caudate               | 0.015  | -0.007, 0.037 | 1.36  | 0.174   | 0.840 |
| Right.Putamen               | 0.010  | -0.011, 0.03  | 0.93  | 0.353   | 0.840 |
| Right.Pallidum              | -0.002 | -0.019, 0.015 | -0.20 | 0.843   | 0.931 |
| Right.Hippocampus           | 0.014  | -0.004, 0.032 | 1.56  | 0.120   | 0.840 |
| Right.Amygdala              | 0.019  | -0.004, 0.042 | 1.61  | 0.107   | 0.840 |
| Right.Accumbens.area        | 0.019  | -0.007, 0.044 | 1.42  | 0.157   | 0.840 |
| Right.VentralDC             | 0.002  | -0.019, 0.022 | 0.18  | 0.854   | 0.932 |
| <b>Cortical regions</b>     |        |               |       |         |       |
| lh_G_and_S_frontomargin     | 0.006  | -0.04, 0.051  | 0.25  | 0.804   | 0.911 |
| lh_G_and_S_occipital_inf    | 0.008  | -0.024, 0.039 | 0.48  | 0.628   | 0.850 |
| lh_G_and_S_paracentral      | -0.005 | -0.026, 0.016 | -0.46 | 0.645   | 0.853 |
| lh_G_and_S_subcentral       | -0.010 | -0.033, 0.014 | -0.83 | 0.408   | 0.840 |
| lh_G_and_S_transv_frontopol | 0.022  | -0.023, 0.067 | 0.96  | 0.336   | 0.840 |
| lh_G_and_S_cingul.Ant       | 0.011  | -0.01, 0.032  | 1.00  | 0.318   | 0.840 |
| lh_G_and_S_cingul.Mid.Ant   | 0.009  | -0.01, 0.028  | 0.89  | 0.374   | 0.840 |
| lh_G_and_S_cingul.Mid.Post  | 0.001  | -0.017, 0.019 | 0.11  | 0.914   | 0.954 |
| lh_G_cingul.Post.dorsal     | 0.002  | -0.017, 0.022 | 0.24  | 0.808   | 0.911 |
| lh_G_cingul.Post.ventral    | 0.006  | -0.038, 0.049 | 0.26  | 0.797   | 0.911 |
| lh_G_cuneus                 | -0.013 | -0.041, 0.015 | -0.93 | 0.351   | 0.840 |
| lh_G_front_inf.Opercular    | 0.007  | -0.014, 0.027 | 0.64  | 0.521   | 0.840 |

**eTable 21. Differences in functional activity between the never-suicidal group and the caregiver-reported suicidality group for loss feedback: Welch's t-test**

| ROIs                       | Mean   | 95%CI         | t     | p (unc)      | p FDR |
|----------------------------|--------|---------------|-------|--------------|-------|
| lh_G_front_inf.Orbital     | 0.028  | -0.005, 0.061 | 1.67  | 0.096        | 0.840 |
| lh_G_front_inf.Triangul    | 0.033  | 0.006, 0.059  | 2.41  | <b>0.017</b> | 0.554 |
| lh_G_front_middle          | -0.003 | -0.023, 0.018 | -0.29 | 0.775        | 0.911 |
| lh_G_front_sup             | 0.005  | -0.011, 0.02  | 0.59  | 0.555        | 0.840 |
| lh_G_Ins_lg_and_S_cent_ins | 0.006  | -0.014, 0.026 | 0.57  | 0.568        | 0.840 |
| lh_G_insular_short         | 0.014  | -0.004, 0.031 | 1.55  | 0.122        | 0.840 |
| lh_G_occipital_middle      | -0.008 | -0.028, 0.013 | -0.72 | 0.473        | 0.840 |
| lh_G_occipital_sup         | -0.014 | -0.037, 0.008 | -1.27 | 0.206        | 0.840 |
| lh_G_oc.temp_lat.fusifor   | -0.001 | -0.027, 0.024 | -0.09 | 0.930        | 0.954 |
| lh_G_oc.temp_med.Lingual   | -0.006 | -0.038, 0.026 | -0.37 | 0.709        | 0.903 |
| lh_G_oc.temp_med.Parahip   | 0.004  | -0.021, 0.028 | 0.31  | 0.760        | 0.911 |
| lh_G_orbital               | 0.019  | -0.019, 0.057 | 0.97  | 0.333        | 0.840 |
| lh_G_pariet_inf.Angular    | 0.016  | -0.004, 0.036 | 1.53  | 0.126        | 0.840 |
| lh_G_pariet_inf.Supramar   | 0.002  | -0.015, 0.02  | 0.25  | 0.800        | 0.911 |
| lh_G_parietal_sup          | 0.005  | -0.014, 0.025 | 0.54  | 0.588        | 0.850 |
| lh_G_postcentral           | 0.009  | -0.012, 0.03  | 0.87  | 0.386        | 0.840 |
| lh_G_precentral            | 0.004  | -0.012, 0.02  | 0.53  | 0.598        | 0.850 |
| lh_G_precuneus             | -0.006 | -0.024, 0.013 | -0.62 | 0.538        | 0.840 |
| lh_G_rectus                | -0.014 | -0.083, 0.055 | -0.40 | 0.689        | 0.886 |
| lh_G_subcallosal           | 0.041  | 0.004, 0.078  | 2.20  | <b>0.028</b> | 0.673 |
| lh_G_temp_sup.G_T_transv   | -0.015 | -0.039, 0.009 | -1.23 | 0.218        | 0.840 |
| lh_G_temp_sup.Lateral      | 0.004  | -0.012, 0.021 | 0.50  | 0.615        | 0.850 |
| lh_G_temp_sup.Plan_polar   | -0.009 | -0.028, 0.01  | -0.95 | 0.344        | 0.840 |
| lh_G_temp_sup.Plan_tempo   | 0.001  | -0.02, 0.022  | 0.09  | 0.927        | 0.954 |
| lh_G_temporal_inf          | 0.004  | -0.029, 0.038 | 0.25  | 0.805        | 0.911 |
| lh_G_temporal_middle       | 0.040  | 0.017, 0.062  | 3.45  | <b>0.001</b> | 0.104 |
| lh_Lat_Fis.ant.Horizontal  | 0.021  | -0.007, 0.049 | 1.48  | 0.139        | 0.840 |
| lh_Lat_Fis.ant.Vertical    | -0.005 | -0.038, 0.027 | -0.32 | 0.752        | 0.911 |
| lh_Lat_Fis.post            | -0.002 | -0.026, 0.023 | -0.13 | 0.900        | 0.954 |
| lh_Pole_occipital          | 0.002  | -0.041, 0.044 | 0.08  | 0.936        | 0.954 |
| lh_Pole_temporal           | 0.010  | -0.021, 0.041 | 0.64  | 0.524        | 0.840 |
| lh_S_calcarine             | -0.011 | -0.04, 0.018  | -0.74 | 0.462        | 0.840 |
| lh_S_central               | -0.019 | -0.044, 0.006 | -1.47 | 0.142        | 0.840 |
| lh_S_cingul.Marginalis     | -0.008 | -0.028, 0.011 | -0.87 | 0.384        | 0.840 |
| lh_S_circular_insula_ant   | 0.005  | -0.018, 0.028 | 0.46  | 0.649        | 0.853 |
| lh_S_circular_insula_inf   | -0.001 | -0.02, 0.018  | -0.13 | 0.900        | 0.954 |
| lh_S_circular_insula_sup   | -0.006 | -0.027, 0.015 | -0.58 | 0.565        | 0.840 |
| lh_S_collat_transv_ant     | 0.012  | -0.023, 0.047 | 0.67  | 0.501        | 0.840 |
| lh_S_collat_transv_post    | -0.007 | -0.033, 0.019 | -0.51 | 0.613        | 0.850 |
| lh_S_front_inf             | 0.010  | -0.014, 0.033 | 0.79  | 0.428        | 0.840 |
| lh_S_front_middle          | -0.006 | -0.03, 0.018  | -0.48 | 0.629        | 0.850 |
| lh_S_front_sup             | 0.005  | -0.013, 0.022 | 0.53  | 0.594        | 0.850 |
| lh_S_interm_prim.Jensen    | 0.033  | 0.008, 0.058  | 2.62  | <b>0.009</b> | 0.385 |

**eTable 21. Differences in functional activity between the never-suicidal group and the caregiver-reported suicidality group for loss feedback: Welch's t-test**

| ROIs                         | Mean   | 95%CI         | t     | p (unc)      | p FDR |
|------------------------------|--------|---------------|-------|--------------|-------|
| lh_S_intrapariet_and_P_trans | 0.003  | -0.018, 0.023 | 0.27  | 0.787        | 0.911 |
| lh_S_oc_middle_and_Lunatus   | -0.001 | -0.026, 0.024 | -0.08 | 0.937        | 0.954 |
| lh_S_oc_sup_and_transversal  | -0.001 | -0.023, 0.021 | -0.11 | 0.911        | 0.954 |
| lh_S_occipital_ant           | 0.007  | -0.013, 0.028 | 0.69  | 0.488        | 0.840 |
| lh_S_oc.temp_lat             | 0.012  | -0.007, 0.031 | 1.20  | 0.231        | 0.840 |
| lh_S_oc.temp_med_and_Lingual | -0.006 | -0.025, 0.012 | -0.68 | 0.494        | 0.840 |
| lh_S_orbital_lateral         | 0.023  | -0.015, 0.06  | 1.19  | 0.233        | 0.840 |
| lh_S_orbital_med.olfact      | 0.047  | -0.011, 0.105 | 1.59  | 0.114        | 0.840 |
| lh_S_orbital.H_Shaped        | 0.006  | -0.023, 0.034 | 0.41  | 0.685        | 0.886 |
| lh_S_parieto_occipital       | -0.006 | -0.026, 0.013 | -0.64 | 0.520        | 0.840 |
| lh_S_pericallosal            | -0.004 | -0.027, 0.019 | -0.32 | 0.747        | 0.911 |
| lh_S_postcentral             | 0.007  | -0.012, 0.025 | 0.71  | 0.479        | 0.840 |
| lh_S_precentral.inf.part     | 0.013  | -0.009, 0.034 | 1.15  | 0.251        | 0.840 |
| lh_S_precentral.sup.part     | 0.005  | -0.012, 0.023 | 0.58  | 0.562        | 0.840 |
| lh_S_suborbital              | 0.012  | -0.038, 0.062 | 0.46  | 0.643        | 0.853 |
| lh_S_subparietal             | 0.008  | -0.015, 0.032 | 0.72  | 0.474        | 0.840 |
| lh_S_temporal_inf            | 0.001  | -0.03, 0.032  | 0.06  | 0.952        | 0.963 |
| lh_S_temporal_sup            | 0.025  | 0.006, 0.043  | 2.63  | <b>0.009</b> | 0.385 |
| lh_S_temporal_transverse     | -0.017 | -0.048, 0.014 | -1.07 | 0.285        | 0.840 |
| rh_G_and_S_frontomargin      | -0.012 | -0.058, 0.034 | -0.51 | 0.613        | 0.850 |
| rh_G_and_S_occipital_inf     | -0.001 | -0.03, 0.029  | -0.05 | 0.962        | 0.968 |
| rh_G_and_S_paracentral       | 0.006  | -0.017, 0.029 | 0.48  | 0.630        | 0.850 |
| rh_G_and_S_subcentral        | 0.000  | -0.024, 0.024 | 0.01  | 0.996        | 0.996 |
| rh_G_and_S_transv_frontopol  | -0.006 | -0.04, 0.028  | -0.34 | 0.733        | 0.911 |
| rh_G_and_S_cingul.Ant        | 0.009  | -0.014, 0.032 | 0.78  | 0.436        | 0.840 |
| rh_G_and_S_cingul.Mid.Ant    | -0.003 | -0.022, 0.016 | -0.28 | 0.778        | 0.911 |
| rh_G_and_S_cingul.Mid.Post   | 0.004  | -0.013, 0.022 | 0.48  | 0.631        | 0.850 |
| rh_G_cingul.Post.dorsal      | 0.014  | -0.005, 0.032 | 1.46  | 0.144        | 0.840 |
| rh_G_cingul.Post.ventral     | 0.012  | -0.022, 0.047 | 0.70  | 0.484        | 0.840 |
| rh_G_cuneus                  | -0.021 | -0.049, 0.007 | -1.49 | 0.138        | 0.840 |
| rh_G_front_inf.Opercular     | 0.009  | -0.012, 0.03  | 0.82  | 0.412        | 0.840 |
| rh_G_front_inf.Orbital       | 0.016  | -0.015, 0.048 | 1.04  | 0.299        | 0.840 |
| rh_G_front_inf.Triangul      | 0.001  | -0.022, 0.024 | 0.08  | 0.937        | 0.954 |
| rh_G_front_middle            | 0.017  | -0.004, 0.038 | 1.61  | 0.108        | 0.840 |
| rh_G_front_sup               | 0.001  | -0.014, 0.016 | 0.14  | 0.886        | 0.954 |
| rh_G_Ins_lg_and_S_cent_ins   | 0.004  | -0.019, 0.026 | 0.34  | 0.735        | 0.911 |
| rh_G_insular_short           | 0.007  | -0.012, 0.026 | 0.76  | 0.446        | 0.840 |
| rh_G_occipital_middle        | 0.010  | -0.011, 0.031 | 0.94  | 0.347        | 0.840 |
| rh_G_occipital_sup           | -0.014 | -0.036, 0.008 | -1.23 | 0.221        | 0.840 |
| rh_G_oc.temp_lat.fusifor     | -0.007 | -0.034, 0.02  | -0.52 | 0.604        | 0.850 |
| rh_G_oc.temp_med.Lingual     | -0.015 | -0.045, 0.016 | -0.94 | 0.347        | 0.840 |
| rh_G_oc.temp_med.Parahip     | 0.014  | -0.013, 0.041 | 0.99  | 0.324        | 0.840 |
| rh_G_orbital                 | 0.024  | -0.013, 0.06  | 1.27  | 0.203        | 0.840 |

**eTable 21. Differences in functional activity between the never-suicidal group and the caregiver-reported suicidality group for loss feedback: Welch's t-test**

| ROIs                         | Mean   | 95%CI         | t     | p (unc)      | p FDR |
|------------------------------|--------|---------------|-------|--------------|-------|
| rh_G_pariet_inf.Angular      | 0.008  | -0.012, 0.027 | 0.79  | 0.431        | 0.840 |
| rh_G_pariet_inf.Supramar     | 0.005  | -0.012, 0.023 | 0.61  | 0.544        | 0.840 |
| rh_G_parietal_sup            | 0.006  | -0.012, 0.025 | 0.69  | 0.493        | 0.840 |
| rh_G_postcentral             | 0.009  | -0.011, 0.029 | 0.88  | 0.377        | 0.840 |
| rh_G_precentral              | -0.002 | -0.018, 0.013 | -0.27 | 0.785        | 0.911 |
| rh_G_precuneus               | -0.006 | -0.024, 0.013 | -0.60 | 0.548        | 0.840 |
| rh_G_rectus                  | 0.027  | -0.061, 0.115 | 0.61  | 0.541        | 0.840 |
| rh_G_subcallosal             | 0.011  | -0.023, 0.045 | 0.63  | 0.530        | 0.840 |
| rh_G_temp_sup.G_T_transv     | -0.008 | -0.031, 0.015 | -0.69 | 0.491        | 0.840 |
| rh_G_temp_sup.Lateral        | 0.006  | -0.01, 0.023  | 0.76  | 0.450        | 0.840 |
| rh_G_temp_sup.Plan_polar     | -0.008 | -0.026, 0.009 | -0.92 | 0.356        | 0.840 |
| rh_G_temp_sup.Plan_tempo     | -0.002 | -0.024, 0.02  | -0.19 | 0.847        | 0.931 |
| rh_G_temporal_inf            | 0.015  | -0.019, 0.05  | 0.88  | 0.377        | 0.840 |
| rh_G_temporal_middle         | 0.003  | -0.018, 0.024 | 0.28  | 0.782        | 0.911 |
| rh_Lat_Fis.ant.Horizontal    | 0.011  | -0.015, 0.038 | 0.85  | 0.398        | 0.840 |
| rh_Lat_Fis.ant.Vertical      | 0.056  | 0.021, 0.09   | 3.18  | <b>0.002</b> | 0.131 |
| rh_Lat_Fis.post              | 0.003  | -0.023, 0.029 | 0.21  | 0.832        | 0.931 |
| rh_Pole_occipital            | 0.029  | -0.01, 0.068  | 1.46  | 0.146        | 0.840 |
| rh_Pole_temporal             | 0.017  | -0.018, 0.051 | 0.94  | 0.346        | 0.840 |
| rh_S_calcarine               | -0.013 | -0.041, 0.015 | -0.89 | 0.373        | 0.840 |
| rh_S_central                 | -0.012 | -0.036, 0.013 | -0.93 | 0.355        | 0.840 |
| rh_S_cingul.Marginalis       | -0.007 | -0.026, 0.011 | -0.79 | 0.430        | 0.840 |
| rh_S_circular_insula_ant     | 0.021  | -0.002, 0.045 | 1.82  | 0.069        | 0.840 |
| rh_S_circular_insula_inf     | -0.006 | -0.025, 0.013 | -0.61 | 0.544        | 0.840 |
| rh_S_circular_insula_sup     | -0.012 | -0.032, 0.009 | -1.08 | 0.280        | 0.840 |
| rh_S_collat_transv_ant       | 0.005  | -0.031, 0.041 | 0.29  | 0.775        | 0.911 |
| rh_S_collat_transv_post      | -0.013 | -0.04, 0.014  | -0.98 | 0.329        | 0.840 |
| rh_S_front_inf               | 0.011  | -0.012, 0.033 | 0.91  | 0.361        | 0.840 |
| rh_S_front_middle            | -0.011 | -0.033, 0.011 | -0.98 | 0.329        | 0.840 |
| rh_S_front_sup               | 0.009  | -0.007, 0.025 | 1.09  | 0.275        | 0.840 |
| rh_S_interm_prim.Jensen      | 0.008  | -0.015, 0.031 | 0.66  | 0.511        | 0.840 |
| rh_S_intrapariet_and_P_trans | 0.002  | -0.017, 0.021 | 0.25  | 0.803        | 0.911 |
| rh_S_oc_middle_and_Lunatus   | 0.013  | -0.011, 0.038 | 1.08  | 0.283        | 0.840 |
| rh_S_oc_sup_and_transversal  | -0.013 | -0.033, 0.008 | -1.23 | 0.218        | 0.840 |
| rh_S_occipital_ant           | 0.012  | -0.008, 0.032 | 1.21  | 0.227        | 0.840 |
| rh_S_oc.temp_lat             | 0.015  | -0.004, 0.035 | 1.55  | 0.122        | 0.840 |
| rh_S_oc.temp_med_and_Lingual | 0.008  | -0.011, 0.028 | 0.81  | 0.420        | 0.840 |
| rh_S_orbital_lateral         | -0.017 | -0.05, 0.015  | -1.05 | 0.294        | 0.840 |
| rh_S_orbital_med.olfact      | 0.031  | -0.032, 0.094 | 0.97  | 0.332        | 0.840 |
| rh_S_orbital.H_Shaped        | 0.019  | -0.011, 0.048 | 1.25  | 0.212        | 0.840 |
| rh_S_parieto_occipital       | -0.004 | -0.025, 0.016 | -0.42 | 0.674        | 0.880 |
| rh_S_pericallosal            | 0.027  | 0.004, 0.051  | 2.27  | <b>0.024</b> | 0.669 |
| rh_S_postcentral             | 0.010  | -0.008, 0.028 | 1.12  | 0.263        | 0.840 |

**eTable 21. Differences in functional activity between the never-suicidal group and the caregiver-reported suicidality group for loss feedback: Welch's t-test**

| ROIs                     | Mean   | 95%CI         | t     | p (unc) | p FDR |
|--------------------------|--------|---------------|-------|---------|-------|
| rh_S_precentral.inf.part | 0.008  | -0.014, 0.031 | 0.73  | 0.464   | 0.840 |
| rh_S_precentral.sup.part | 0.009  | -0.008, 0.026 | 1.04  | 0.298   | 0.840 |
| rh_S_suborbital          | 0.030  | -0.039, 0.099 | 0.86  | 0.390   | 0.840 |
| rh_S_subparietal         | -0.002 | -0.024, 0.02  | -0.20 | 0.843   | 0.931 |
| rh_S_temporal_inf        | 0.016  | -0.019, 0.05  | 0.89  | 0.372   | 0.840 |
| rh_S_temporal_sup        | 0.006  | -0.011, 0.023 | 0.74  | 0.462   | 0.840 |
| rh_S_temporal_transverse | -0.019 | -0.05, 0.011  | -1.24 | 0.217   | 0.840 |

**Bold** denotes group differences at p<0.05 uncorrected

**eTable 22. Differences in functional activity between the never-suicidal group and the concordantly-reported suicidality group for loss feedback: Welch's t-test**

| ROIs                       | Mean   | 95%CI         | t     | p (unc) | p FDR |
|----------------------------|--------|---------------|-------|---------|-------|
| <b>Subcortical regions</b> |        |               |       |         |       |
| Left.Cerebellum.Cortex     | 0.038  | -0.027, 0.102 | 1.16  | 0.247   | 0.989 |
| Left.Thalamus.Proper       | 0.008  | -0.021, 0.037 | 0.53  | 0.600   | 0.989 |
| Left.Caudate               | -0.002 | -0.04, 0.036  | -0.11 | 0.916   | 0.989 |
| Left.Putamen               | -0.004 | -0.037, 0.028 | -0.27 | 0.791   | 0.989 |
| Left.Pallidum              | -0.012 | -0.042, 0.018 | -0.78 | 0.435   | 0.989 |
| Brain.Stem                 | 0.001  | -0.034, 0.036 | 0.07  | 0.941   | 0.989 |
| Left.Hippocampus           | 0.004  | -0.026, 0.034 | 0.27  | 0.785   | 0.989 |
| Left.Amygdala              | -0.005 | -0.044, 0.035 | -0.24 | 0.810   | 0.989 |
| Left.Accumbens.area        | 0.009  | -0.036, 0.054 | 0.39  | 0.695   | 0.989 |
| Left.VentralDC             | 0.016  | -0.023, 0.055 | 0.81  | 0.420   | 0.989 |
| Right.Cerebellum.Cortex    | 0.026  | -0.031, 0.083 | 0.91  | 0.367   | 0.989 |
| Right.Thalamus.Proper      | 0.018  | -0.013, 0.049 | 1.17  | 0.246   | 0.989 |
| Right.Caudate              | -0.014 | -0.056, 0.028 | -0.64 | 0.521   | 0.989 |
| Right.Putamen              | 0.002  | -0.034, 0.038 | 0.11  | 0.914   | 0.989 |
| Right.Pallidum             | -0.028 | -0.06, 0.005  | -1.67 | 0.098   | 0.989 |
| Right.Hippocampus          | 0.013  | -0.018, 0.045 | 0.85  | 0.397   | 0.989 |
| Right.Amygdala             | 0.006  | -0.037, 0.05  | 0.29  | 0.771   | 0.989 |
| Right.Accumbens.area       | 0.022  | -0.025, 0.069 | 0.92  | 0.362   | 0.989 |

**eTable 22. Differences in functional activity between the never-suicidal group and the concordantly-reported suicidality group for loss feedback: Welch's t-test**

| ROIs                        | Mean   | 95%CI         | t     | p (unc) | p FDR |
|-----------------------------|--------|---------------|-------|---------|-------|
| Right.VentralDC             | 0.012  | -0.025, 0.049 | 0.65  | 0.516   | 0.989 |
| <b>Cortical regions</b>     |        |               |       |         |       |
| lh_G_and_S_frontomargin     | -0.047 | -0.128, 0.033 | -1.18 | 0.243   | 0.989 |
| lh_G_and_S_occipital_inf    | 0.027  | -0.035, 0.088 | 0.86  | 0.392   | 0.989 |
| lh_G_and_S_paracentral      | -0.013 | -0.055, 0.029 | -0.61 | 0.541   | 0.989 |
| lh_G_and_S_subcentral       | -0.033 | -0.073, 0.007 | -1.63 | 0.107   | 0.989 |
| lh_G_and_S_transv_frontopol | 0.007  | -0.072, 0.086 | 0.17  | 0.866   | 0.989 |
| lh_G_and_S_cingul.Ant       | 0.022  | -0.016, 0.059 | 1.16  | 0.249   | 0.989 |
| lh_G_and_S_cingul.Mid.Ant   | 0.011  | -0.024, 0.045 | 0.61  | 0.541   | 0.989 |
| lh_G_and_S_cingul.Mid.Post  | 0.008  | -0.023, 0.038 | 0.49  | 0.626   | 0.989 |
| lh_G_cingul.Post.dorsal     | -0.006 | -0.046, 0.033 | -0.31 | 0.758   | 0.989 |
| lh_G_cingul.Post.ventral    | -0.023 | -0.106, 0.06  | -0.56 | 0.579   | 0.989 |
| lh_G_cuneus                 | -0.022 | -0.078, 0.034 | -0.77 | 0.443   | 0.989 |
| lh_G_front_inf.Opercular    | -0.015 | -0.054, 0.024 | -0.78 | 0.439   | 0.989 |
| lh_G_front_inf.Orbital      | 0.011  | -0.053, 0.076 | 0.35  | 0.729   | 0.989 |
| lh_G_front_inf.Triangul     | 0.014  | -0.039, 0.067 | 0.54  | 0.589   | 0.989 |
| lh_G_front_middle           | -0.034 | -0.071, 0.004 | -1.79 | 0.077   | 0.989 |
| lh_G_front_sup              | 0.001  | -0.027, 0.03  | 0.10  | 0.923   | 0.989 |
| lh_G_Ins_lg_and_S_cent_ins  | -0.001 | -0.04, 0.038  | -0.07 | 0.946   | 0.989 |
| lh_G_insular_short          | 0.020  | -0.014, 0.054 | 1.14  | 0.255   | 0.989 |
| lh_G_occipital_middle       | -0.012 | -0.051, 0.027 | -0.61 | 0.541   | 0.989 |
| lh_G_occipital_sup          | -0.022 | -0.063, 0.019 | -1.05 | 0.294   | 0.989 |
| lh_G_oc.temp_lat.fusifor    | 0.002  | -0.048, 0.051 | 0.07  | 0.943   | 0.989 |
| lh_G_oc.temp_med.Lingual    | -0.005 | -0.064, 0.054 | -0.17 | 0.863   | 0.989 |
| lh_G_oc.temp_med.Parahip    | 0.016  | -0.032, 0.064 | 0.67  | 0.505   | 0.989 |
| lh_G_orbital                | 0.009  | -0.066, 0.084 | 0.24  | 0.809   | 0.989 |
| lh_G_pariet_inf.Angular     | 0.016  | -0.025, 0.057 | 0.75  | 0.453   | 0.989 |
| lh_G_pariet_inf.Supramar    | -0.005 | -0.036, 0.027 | -0.29 | 0.772   | 0.989 |
| lh_G_parietal_sup           | -0.005 | -0.039, 0.028 | -0.32 | 0.752   | 0.989 |
| lh_G_postcentral            | -0.010 | -0.043, 0.023 | -0.59 | 0.559   | 0.989 |
| lh_G_precentral             | 0.001  | -0.025, 0.028 | 0.11  | 0.914   | 0.989 |
| lh_G_precuneus              | -0.009 | -0.045, 0.028 | -0.47 | 0.643   | 0.989 |
| lh_G_rectus                 | -0.018 | -0.143, 0.107 | -0.28 | 0.776   | 0.989 |
| lh_G_subcallosal            | 0.033  | -0.036, 0.102 | 0.94  | 0.349   | 0.989 |
| lh_G_temp_sup.G_T_transv    | 0.003  | -0.038, 0.043 | 0.13  | 0.893   | 0.989 |
| lh_G_temp_sup.Lateral       | -0.006 | -0.036, 0.024 | -0.40 | 0.691   | 0.989 |
| lh_G_temp_sup.Plan_polar    | -0.012 | -0.044, 0.02  | -0.74 | 0.461   | 0.989 |
| lh_G_temp_sup.Plan_tempo    | -0.002 | -0.043, 0.039 | -0.10 | 0.923   | 0.989 |
| lh_G_temporal_inf           | 0.011  | -0.051, 0.072 | 0.34  | 0.736   | 0.989 |
| lh_G_temporal_middle        | 0.046  | -0.001, 0.092 | 1.95  | 0.054   | 0.989 |
| lh_Lat_Fis.ant.Horizontal   | -0.004 | -0.056, 0.048 | -0.15 | 0.883   | 0.989 |
| lh_Lat_Fis.ant.Vertical     | -0.022 | -0.086, 0.041 | -0.69 | 0.490   | 0.989 |
| lh_Lat_Fis.post             | -0.001 | -0.044, 0.042 | -0.05 | 0.960   | 0.989 |

**eTable 22. Differences in functional activity between the never-suicidal group and the concordantly-reported suicidality group for loss feedback: Welch's t-test**

| ROIs                         | Mean   | 95%CI         | t     | p (unc) | p FDR |
|------------------------------|--------|---------------|-------|---------|-------|
| lh_Pole_occipital            | 0.036  | -0.047, 0.119 | 0.86  | 0.393   | 0.989 |
| lh_Pole_temporal             | -0.013 | -0.069, 0.042 | -0.47 | 0.639   | 0.989 |
| lh_S_calcarine               | -0.001 | -0.054, 0.051 | -0.06 | 0.956   | 0.989 |
| lh_S_central                 | -0.020 | -0.06, 0.021  | -0.96 | 0.339   | 0.989 |
| lh_S_cingul.Marginalis       | -0.020 | -0.053, 0.014 | -1.16 | 0.249   | 0.989 |
| lh_S_circular_insula_ant     | 0.010  | -0.034, 0.055 | 0.47  | 0.643   | 0.989 |
| lh_S_circular_insula_inf     | 0.002  | -0.031, 0.035 | 0.10  | 0.918   | 0.989 |
| lh_S_circular_insula_sup     | -0.003 | -0.04, 0.034  | -0.16 | 0.873   | 0.989 |
| lh_S_collat_transv_ant       | -0.011 | -0.076, 0.055 | -0.32 | 0.752   | 0.989 |
| lh_S_collat_transv_post      | -0.043 | -0.089, 0.002 | -1.88 | 0.063   | 0.989 |
| lh_S_front_inf               | -0.003 | -0.049, 0.043 | -0.14 | 0.893   | 0.989 |
| lh_S_front_middle            | -0.004 | -0.05, 0.043  | -0.15 | 0.882   | 0.989 |
| lh_S_front_sup               | -0.001 | -0.035, 0.034 | -0.04 | 0.966   | 0.989 |
| lh_S_interm_prim.Jensen      | 0.046  | 0, 0.092      | 1.98  | 0.050   | 0.989 |
| lh_S_intrapariet_and_P_trans | 0.000  | -0.039, 0.039 | 0.01  | 0.994   | 0.994 |
| lh_S_oc_middle_and_Lunatus   | -0.016 | -0.06, 0.029  | -0.69 | 0.493   | 0.989 |
| lh_S_oc_sup_and_transversal  | -0.004 | -0.044, 0.035 | -0.22 | 0.824   | 0.989 |
| lh_S_occipital_ant           | -0.012 | -0.049, 0.025 | -0.65 | 0.519   | 0.989 |
| lh_S_oc.temp_lat             | -0.004 | -0.037, 0.028 | -0.27 | 0.790   | 0.989 |
| lh_S_oc.temp_med_and_Lingual | -0.021 | -0.056, 0.013 | -1.24 | 0.217   | 0.989 |
| lh_S_orbital_lateral         | -0.008 | -0.087, 0.07  | -0.21 | 0.836   | 0.989 |
| lh_S_orbital_med.olfact      | 0.077  | -0.044, 0.198 | 1.27  | 0.208   | 0.989 |
| lh_S_orbital.H_Shaped        | -0.002 | -0.054, 0.05  | -0.06 | 0.949   | 0.989 |
| lh_S_parieto_occipital       | -0.021 | -0.059, 0.017 | -1.10 | 0.273   | 0.989 |
| lh_S_pericallosal            | -0.009 | -0.052, 0.035 | -0.39 | 0.697   | 0.989 |
| lh_S_postcentral             | -0.009 | -0.039, 0.021 | -0.59 | 0.559   | 0.989 |
| lh_S_precentral.inf.part     | 0.025  | -0.015, 0.065 | 1.23  | 0.220   | 0.989 |
| lh_S_precentral.sup.part     | 0.002  | -0.032, 0.035 | 0.10  | 0.921   | 0.989 |
| lh_S_suborbital              | -0.015 | -0.108, 0.077 | -0.32 | 0.746   | 0.989 |
| lh_S_subparietal             | 0.001  | -0.043, 0.044 | 0.02  | 0.980   | 0.992 |
| lh_S_temporal_inf            | 0.031  | -0.029, 0.091 | 1.02  | 0.311   | 0.989 |
| lh_S_temporal_sup            | 0.028  | -0.006, 0.062 | 1.65  | 0.103   | 0.989 |
| lh_S_temporal_transverse     | -0.028 | -0.086, 0.029 | -0.98 | 0.331   | 0.989 |
| rh_G_and_S_frontomargin      | -0.022 | -0.102, 0.059 | -0.53 | 0.594   | 0.989 |
| rh_G_and_S_occipital_inf     | 0.039  | -0.015, 0.094 | 1.42  | 0.159   | 0.989 |
| rh_G_and_S_paracentral       | 0.002  | -0.044, 0.049 | 0.10  | 0.918   | 0.989 |
| rh_G_and_S_subcentral        | -0.016 | -0.055, 0.024 | -0.79 | 0.432   | 0.989 |
| rh_G_and_S_transv_frontopol  | -0.023 | -0.079, 0.033 | -0.83 | 0.411   | 0.989 |
| rh_G_and_S_cingul.Ant        | 0.011  | -0.028, 0.049 | 0.55  | 0.584   | 0.989 |
| rh_G_and_S_cingul.Mid.Ant    | -0.007 | -0.04, 0.025  | -0.45 | 0.654   | 0.989 |
| rh_G_and_S_cingul.Mid.Post   | 0.014  | -0.015, 0.044 | 0.98  | 0.329   | 0.989 |
| rh_G_cingul.Post.dorsal      | 0.009  | -0.03, 0.048  | 0.48  | 0.635   | 0.989 |
| rh_G_cingul.Post.ventral     | -0.027 | -0.089, 0.036 | -0.85 | 0.399   | 0.989 |



**eTable 22. Differences in functional activity between the never-suicidal group and the concordantly-reported suicidality group for loss feedback: Welch's t-test**

| ROIs                       | Mean   | 95%CI         | t     | p (unc) | p FDR |
|----------------------------|--------|---------------|-------|---------|-------|
| rh_G_cuneus                | -0.021 | -0.071, 0.028 | -0.86 | 0.391   | 0.989 |
| rh_G_front_inf.Opercular   | -0.009 | -0.048, 0.029 | -0.49 | 0.626   | 0.989 |
| rh_G_front_inf.Orbital     | -0.030 | -0.085, 0.025 | -1.09 | 0.276   | 0.989 |
| rh_G_front_inf.Triangul    | -0.022 | -0.064, 0.02  | -1.03 | 0.304   | 0.989 |
| rh_G_front_middle          | -0.003 | -0.039, 0.034 | -0.14 | 0.891   | 0.989 |
| rh_G_front_sup             | -0.009 | -0.038, 0.019 | -0.67 | 0.506   | 0.989 |
| rh_G_Ins_lg_and_S_cent_ins | -0.001 | -0.04, 0.038  | -0.04 | 0.972   | 0.989 |
| rh_G_insular_short         | 0.010  | -0.023, 0.043 | 0.60  | 0.551   | 0.989 |
| rh_G_occipital_middle      | 0.007  | -0.035, 0.05  | 0.35  | 0.729   | 0.989 |
| rh_G_occipital_sup         | -0.009 | -0.05, 0.032  | -0.43 | 0.672   | 0.989 |
| rh_G_oc.temp_lat.fusifor   | 0.006  | -0.044, 0.056 | 0.24  | 0.810   | 0.989 |
| rh_G_oc.temp_med.Lingual   | -0.008 | -0.067, 0.051 | -0.27 | 0.788   | 0.989 |
| rh_G_oc.temp_med.Parahip   | 0.006  | -0.042, 0.054 | 0.24  | 0.808   | 0.989 |
| rh_G_orbital               | 0.014  | -0.053, 0.082 | 0.42  | 0.672   | 0.989 |
| rh_G_pariet_inf.Angular    | 0.001  | -0.034, 0.036 | 0.06  | 0.952   | 0.989 |
| rh_G_pariet_inf.Supramar   | -0.004 | -0.035, 0.026 | -0.29 | 0.773   | 0.989 |
| rh_G_parietal_sup          | 0.017  | -0.018, 0.051 | 0.97  | 0.335   | 0.989 |
| rh_G_postcentral           | 0.006  | -0.031, 0.043 | 0.30  | 0.764   | 0.989 |
| rh_G_precentral            | -0.011 | -0.038, 0.016 | -0.83 | 0.410   | 0.989 |
| rh_G_precuneus             | -0.009 | -0.045, 0.026 | -0.51 | 0.612   | 0.989 |
| rh_G_rectus                | 0.092  | -0.063, 0.247 | 1.18  | 0.241   | 0.989 |
| rh_G_subcallosal           | 0.041  | -0.024, 0.106 | 1.26  | 0.210   | 0.989 |
| rh_G_temp_sup.G_T_transv   | -0.007 | -0.049, 0.035 | -0.34 | 0.736   | 0.989 |
| rh_G_temp_sup.Lateral      | -0.002 | -0.031, 0.028 | -0.10 | 0.918   | 0.989 |
| rh_G_temp_sup.Plan_polar   | -0.003 | -0.035, 0.028 | -0.21 | 0.832   | 0.989 |
| rh_G_temp_sup.Plan_tempo   | -0.008 | -0.048, 0.031 | -0.42 | 0.674   | 0.989 |
| rh_G_temporal_inf          | 0.001  | -0.06, 0.062  | 0.04  | 0.965   | 0.989 |
| rh_G_temporal_middle       | 0.006  | -0.033, 0.046 | 0.32  | 0.748   | 0.989 |
| rh_Lat_Fis.ant.Horizontal  | -0.031 | -0.082, 0.021 | -1.18 | 0.240   | 0.989 |
| rh_Lat_Fis.ant.Vertical    | 0.020  | -0.049, 0.088 | 0.58  | 0.566   | 0.989 |
| rh_Lat_Fis.post            | 0.019  | -0.026, 0.065 | 0.85  | 0.396   | 0.989 |
| rh_Pole_occipital          | 0.059  | -0.018, 0.137 | 1.52  | 0.132   | 0.989 |
| rh_Pole_temporal           | -0.005 | -0.07, 0.06   | -0.16 | 0.877   | 0.989 |
| rh_S_calcarine             | -0.018 | -0.071, 0.035 | -0.68 | 0.499   | 0.989 |
| rh_S_central               | -0.002 | -0.049, 0.044 | -0.10 | 0.923   | 0.989 |
| rh_S_cingul.Marginalis     | -0.016 | -0.047, 0.016 | -0.97 | 0.335   | 0.989 |
| rh_S_circular_insula_ant   | 0.011  | -0.033, 0.056 | 0.51  | 0.611   | 0.989 |
| rh_S_circular_insula_inf   | 0.000  | -0.032, 0.031 | -0.01 | 0.989   | 0.994 |
| rh_S_circular_insula_sup   | -0.019 | -0.059, 0.02  | -0.96 | 0.340   | 0.989 |
| rh_S_collat_transv_ant     | -0.051 | -0.118, 0.016 | -1.52 | 0.131   | 0.989 |
| rh_S_collat_transv_post    | -0.021 | -0.065, 0.024 | -0.92 | 0.360   | 0.989 |
| rh_S_front_inf             | 0.003  | -0.038, 0.045 | 0.15  | 0.877   | 0.989 |
| rh_S_front_middle          | -0.033 | -0.071, 0.005 | -1.73 | 0.086   | 0.989 |

**eTable 22. Differences in functional activity between the never-suicidal group and the concordantly-reported suicidality group for loss feedback: Welch's t-test**

| ROIs                         | Mean   | 95%CI         | t     | <i>p</i> (unc) | <i>p</i> FDR |
|------------------------------|--------|---------------|-------|----------------|--------------|
| rh_S_front_sup               | -0.002 | -0.033, 0.029 | -0.12 | 0.905          | 0.989        |
| rh_S_interm_prim.Jensen      | 0.027  | -0.018, 0.071 | 1.19  | 0.238          | 0.989        |
| rh_S_intrapariet_and_P_trans | -0.004 | -0.038, 0.031 | -0.21 | 0.838          | 0.989        |
| rh_S_oc_middle_and_Lunatus   | -0.009 | -0.052, 0.033 | -0.44 | 0.663          | 0.989        |
| rh_S_oc_sup_and_transversal  | -0.014 | -0.05, 0.023  | -0.75 | 0.452          | 0.989        |
| rh_S_occipital_ant           | -0.011 | -0.046, 0.025 | -0.59 | 0.556          | 0.989        |
| rh_S_oc.temp_lat             | 0.024  | -0.014, 0.062 | 1.25  | 0.214          | 0.989        |
| rh_S_oc.temp_med_and_Lingual | -0.003 | -0.043, 0.036 | -0.18 | 0.861          | 0.989        |
| rh_S_orbital_lateral         | -0.039 | -0.103, 0.025 | -1.22 | 0.226          | 0.989        |
| rh_S_orbital_med.olfact      | -0.065 | -0.177, 0.047 | -1.16 | 0.251          | 0.989        |
| rh_S_orbital.H_Shaped        | -0.011 | -0.061, 0.038 | -0.45 | 0.651          | 0.989        |
| rh_S_parieto_occipital       | -0.003 | -0.042, 0.036 | -0.14 | 0.892          | 0.989        |
| rh_S_pericallosal            | 0.012  | -0.031, 0.055 | 0.55  | 0.582          | 0.989        |
| rh_S_postcentral             | 0.005  | -0.028, 0.037 | 0.29  | 0.776          | 0.989        |
| rh_S_precentral.inf.part     | 0.025  | -0.016, 0.065 | 1.21  | 0.230          | 0.989        |
| rh_S_precentral.sup.part     | -0.002 | -0.034, 0.031 | -0.10 | 0.918          | 0.989        |
| rh_S_suborbital              | 0.055  | -0.085, 0.195 | 0.77  | 0.441          | 0.989        |
| rh_S_subparietal             | -0.025 | -0.064, 0.015 | -1.25 | 0.216          | 0.989        |
| rh_S_temporal_inf            | 0.017  | -0.044, 0.077 | 0.55  | 0.583          | 0.989        |
| rh_S_temporal_sup            | 0.006  | -0.025, 0.037 | 0.37  | 0.710          | 0.989        |
| rh_S_temporal_transverse     | 0.012  | -0.041, 0.066 | 0.45  | 0.650          | 0.989        |

**Bold** denotes group differences at  $p < 0.05$  uncorrected

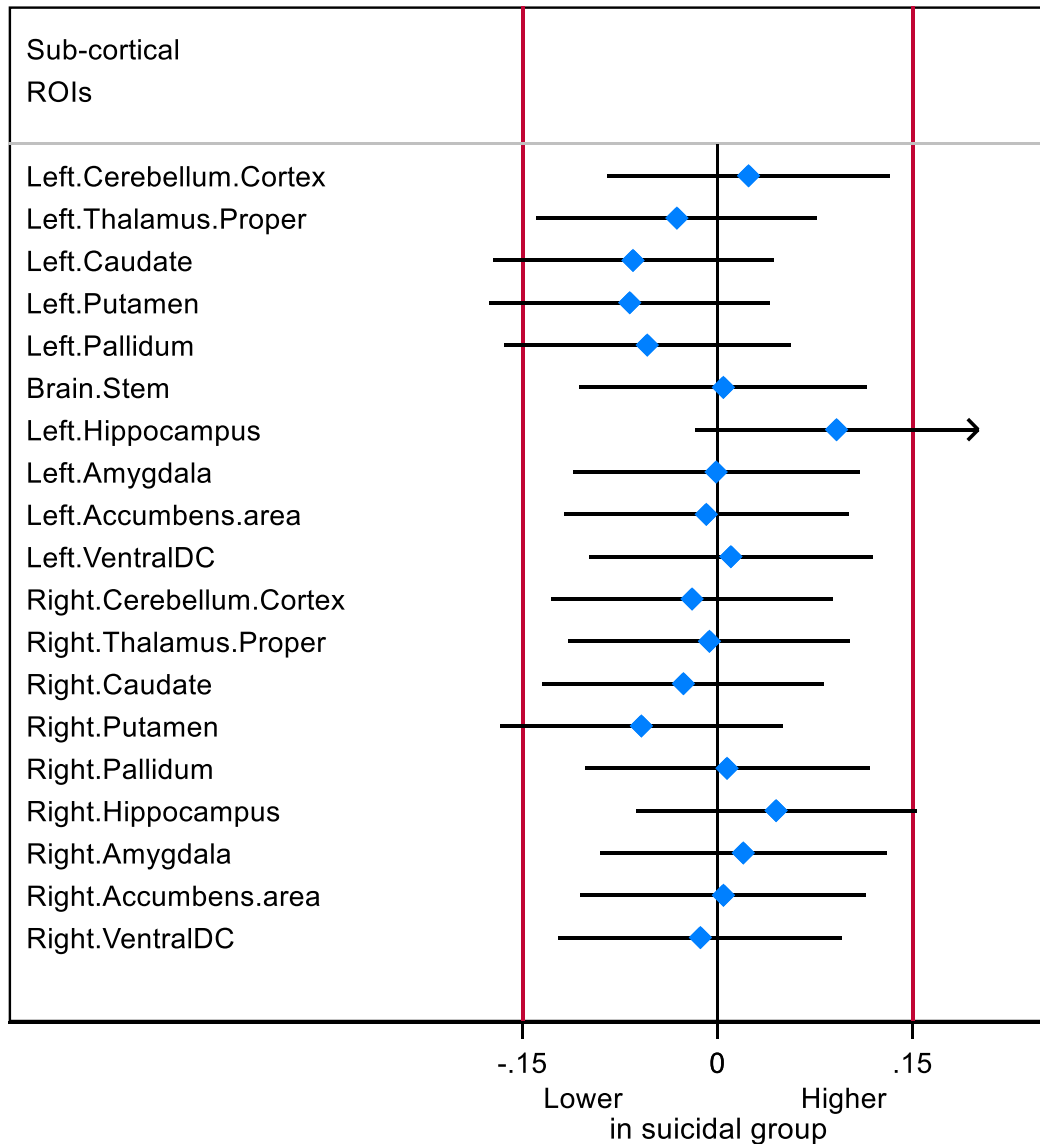

**eFigure 30.** Results of the Equivalence test for differences in functional activity in subcortical regions between the never-suicidal group and the child-reported suicidality group for loss feedback. The figure shows the effect sizes and 95% confidence intervals of the difference against the interval of equivalence (-0.15 to 0.15).

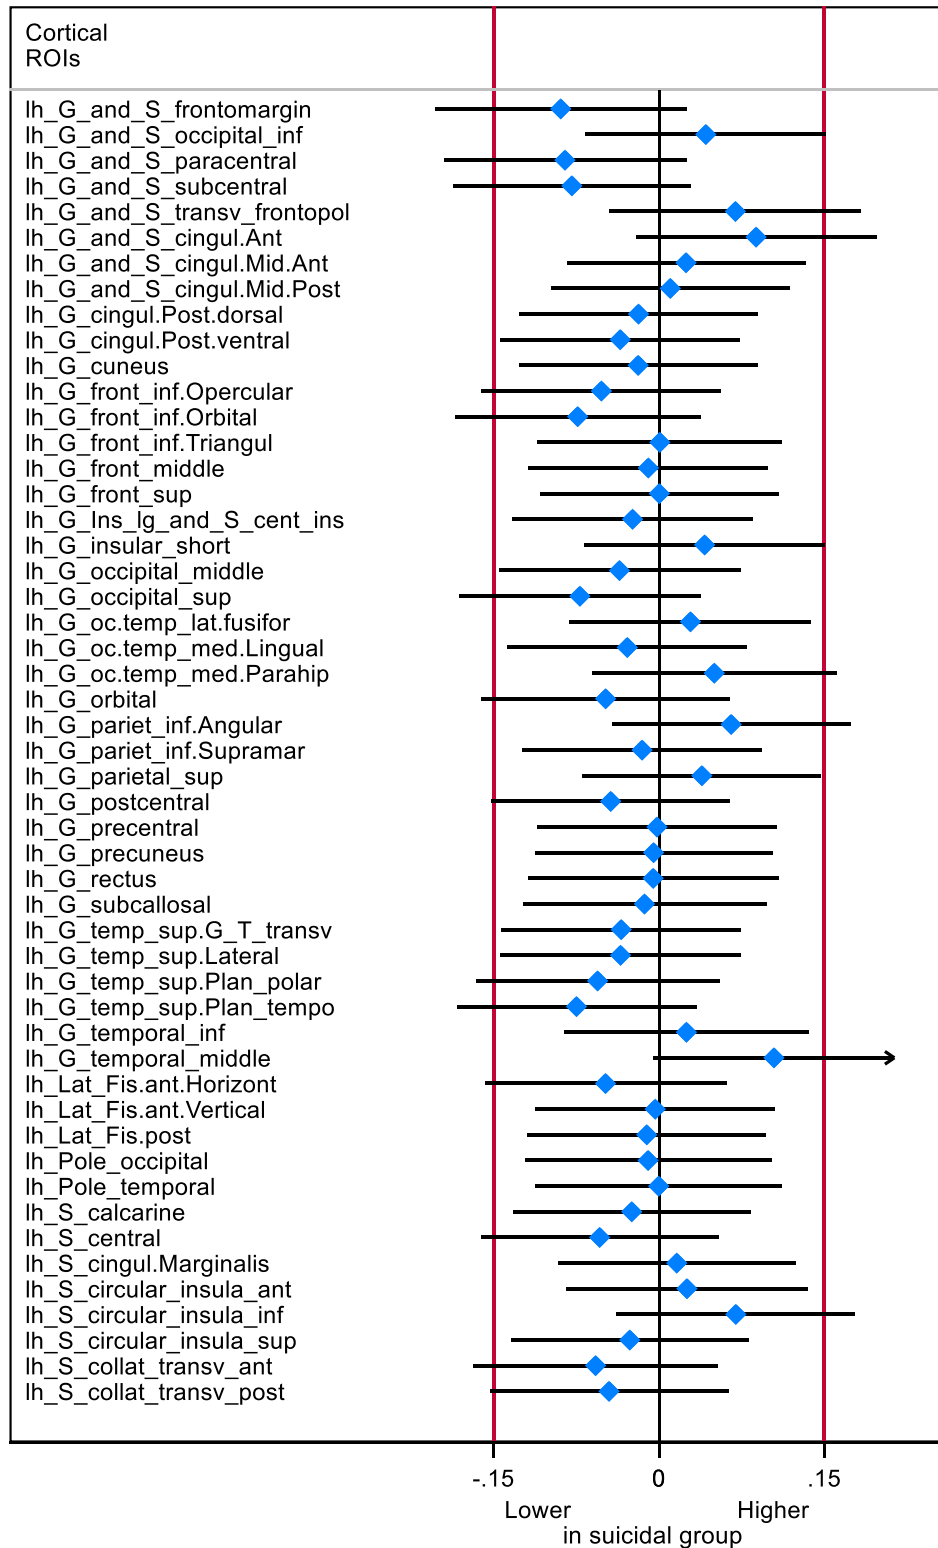

**eFigure 31 (1 of 3).** Results of the Equivalence test for differences in functional activity in cortical regions between the never-suicidal group and the child-reported suicidality group for loss feedback. The figure shows the effect sizes and 95% confidence intervals of the difference against the interval of equivalence (-0.15 to 0.15).

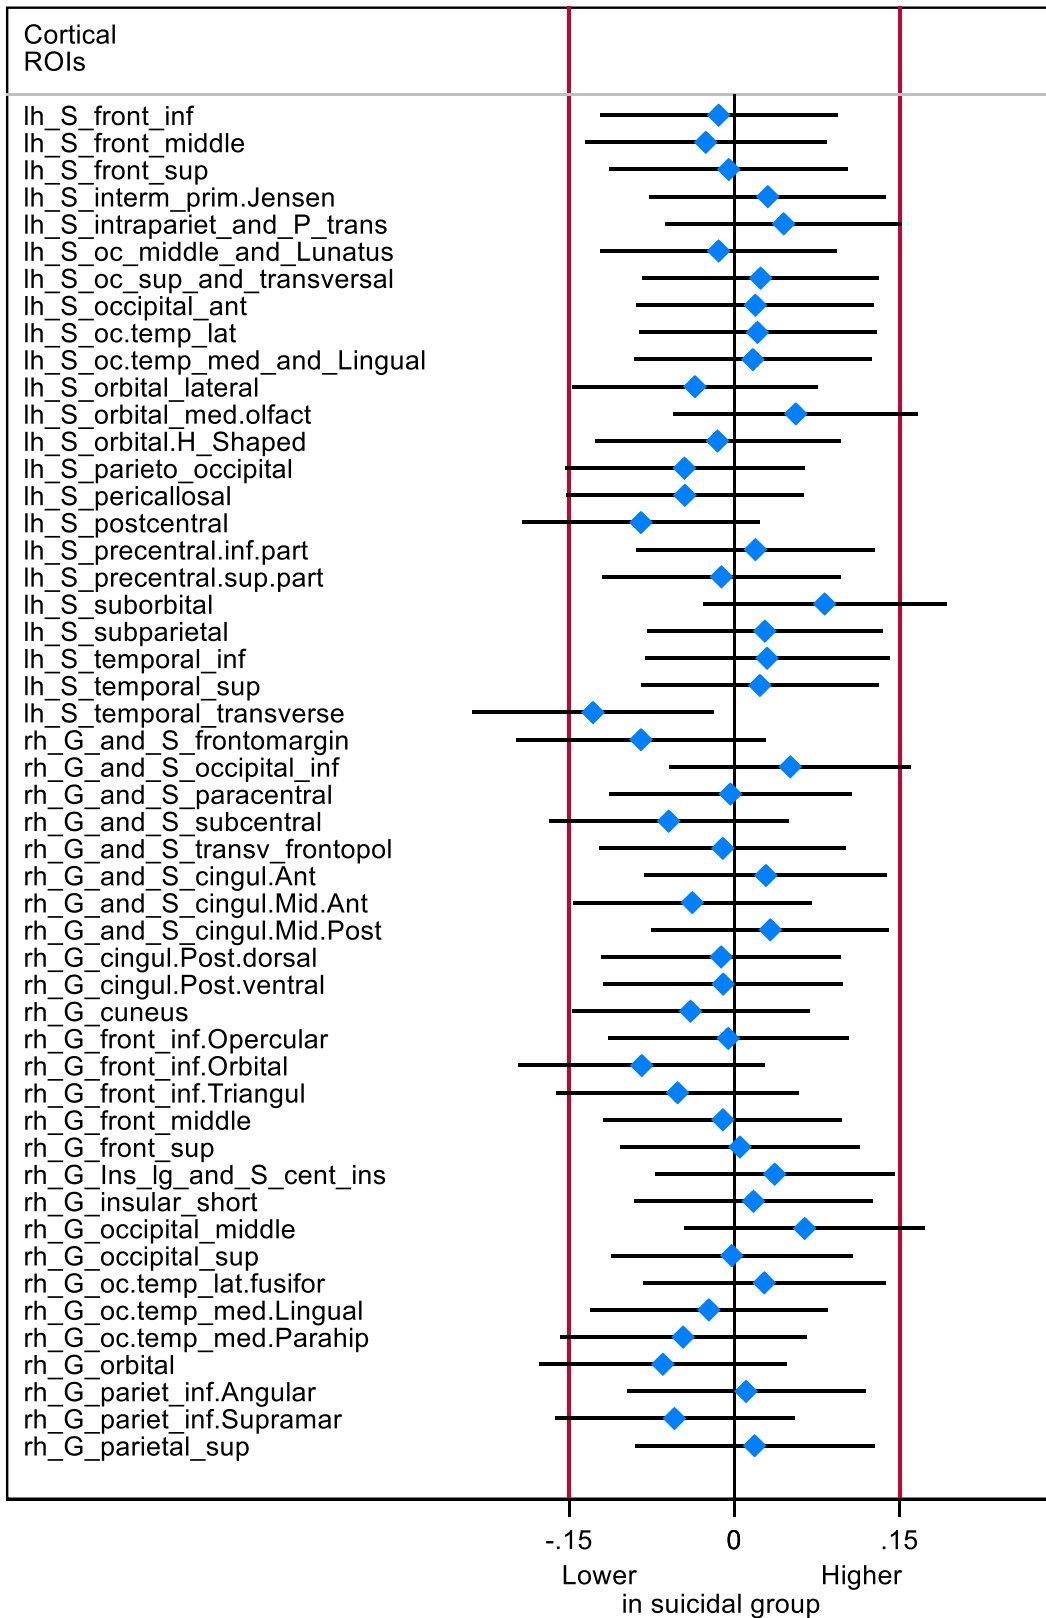

**eFigure 31 (2 of 3).** Results of the Equivalence test for differences in functional activity in cortical regions between the never-suicidal group and the child-reported suicidality group for loss feedback. The figure shows the effect sizes and 95% confidence intervals of the difference against the interval of equivalence (-0.15 to 0.15).

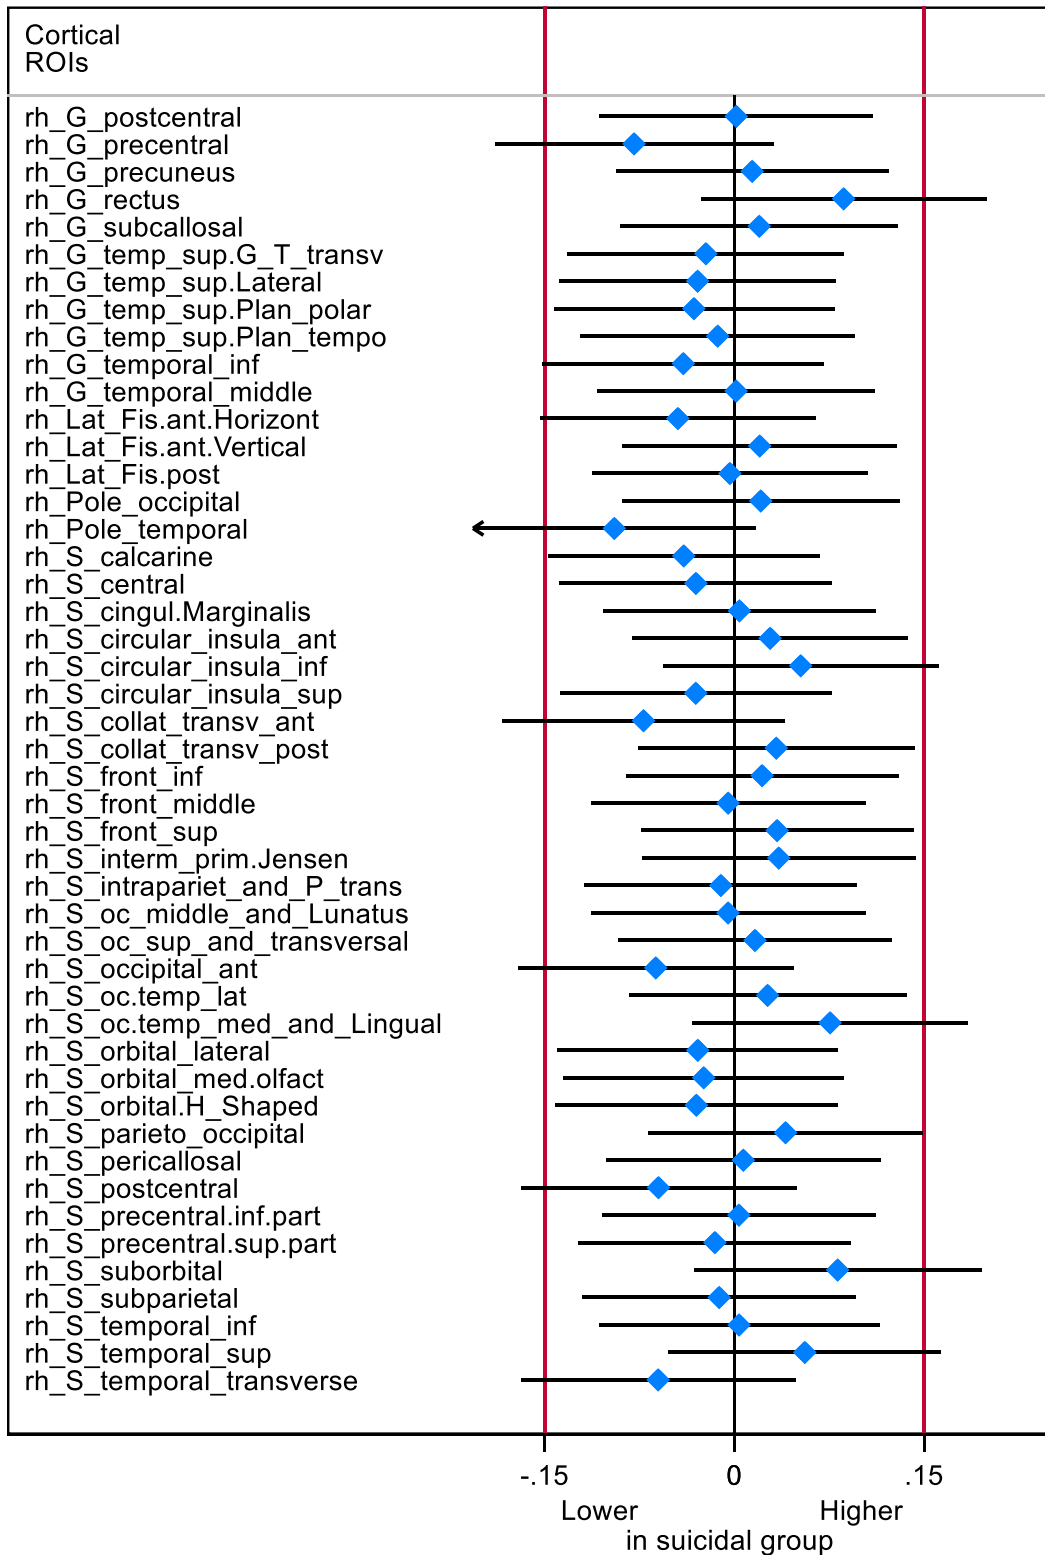

**eFigure 31 (3 of 3).** Results of the Equivalence test for differences in functional activity in cortical regions between the never-suicidal group and the child-reported suicidality group for loss feedback. The figure shows the effect sizes and 95% confidence intervals of the difference against the interval of equivalence (-0.15 to 0.15).

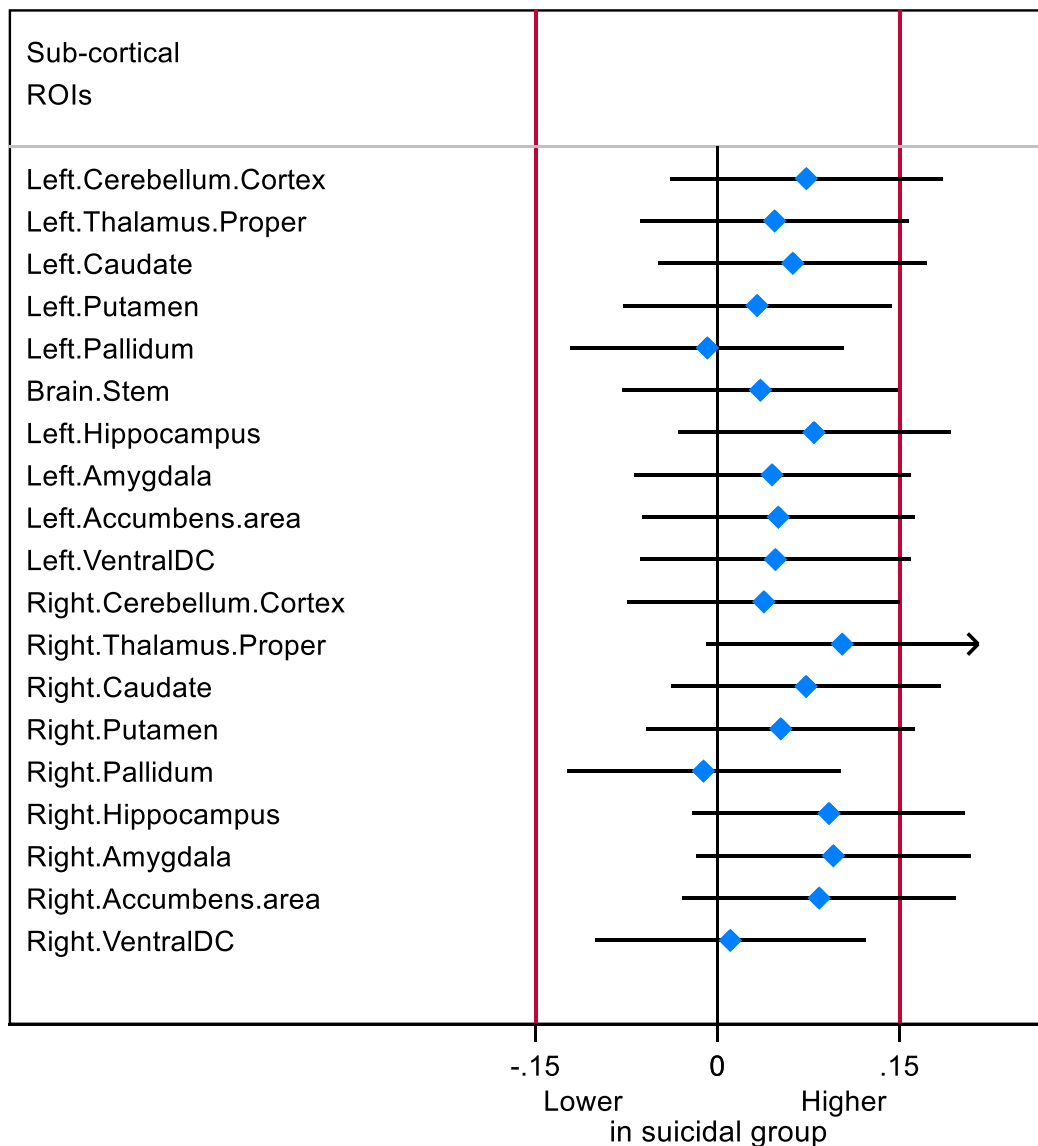

**eFigure 32.** Results of the Equivalence test for differences in functional activity in subcortical regions between the never-suicidal group and the caregiver-reported suicidality group for loss feedback. The figure shows the effect sizes and 95% confidence intervals of the difference against the interval of equivalence (-0.15 to 0.15).

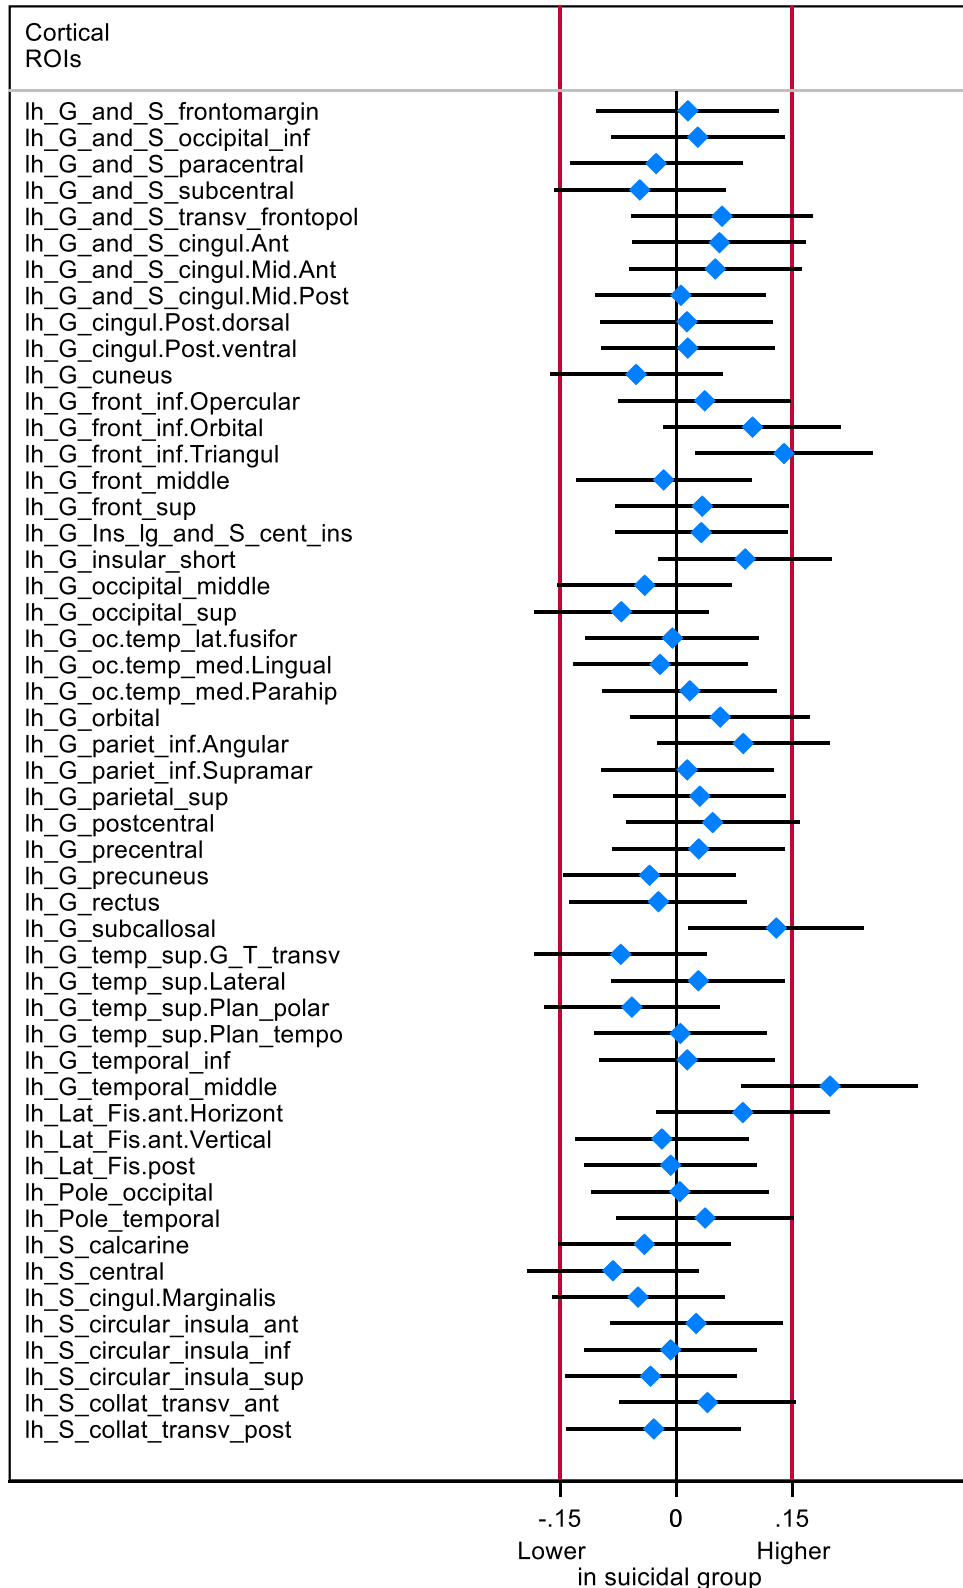

**eFigure 32 (1 of 3).** Results of the Equivalence test for differences in functional activity in cortical regions between the never-suicidal group and the caregiver-reported suicidality group for loss feedback. The figure shows the effect sizes and 95% confidence intervals of the difference against the interval of equivalence (-0.15 to 0.15).



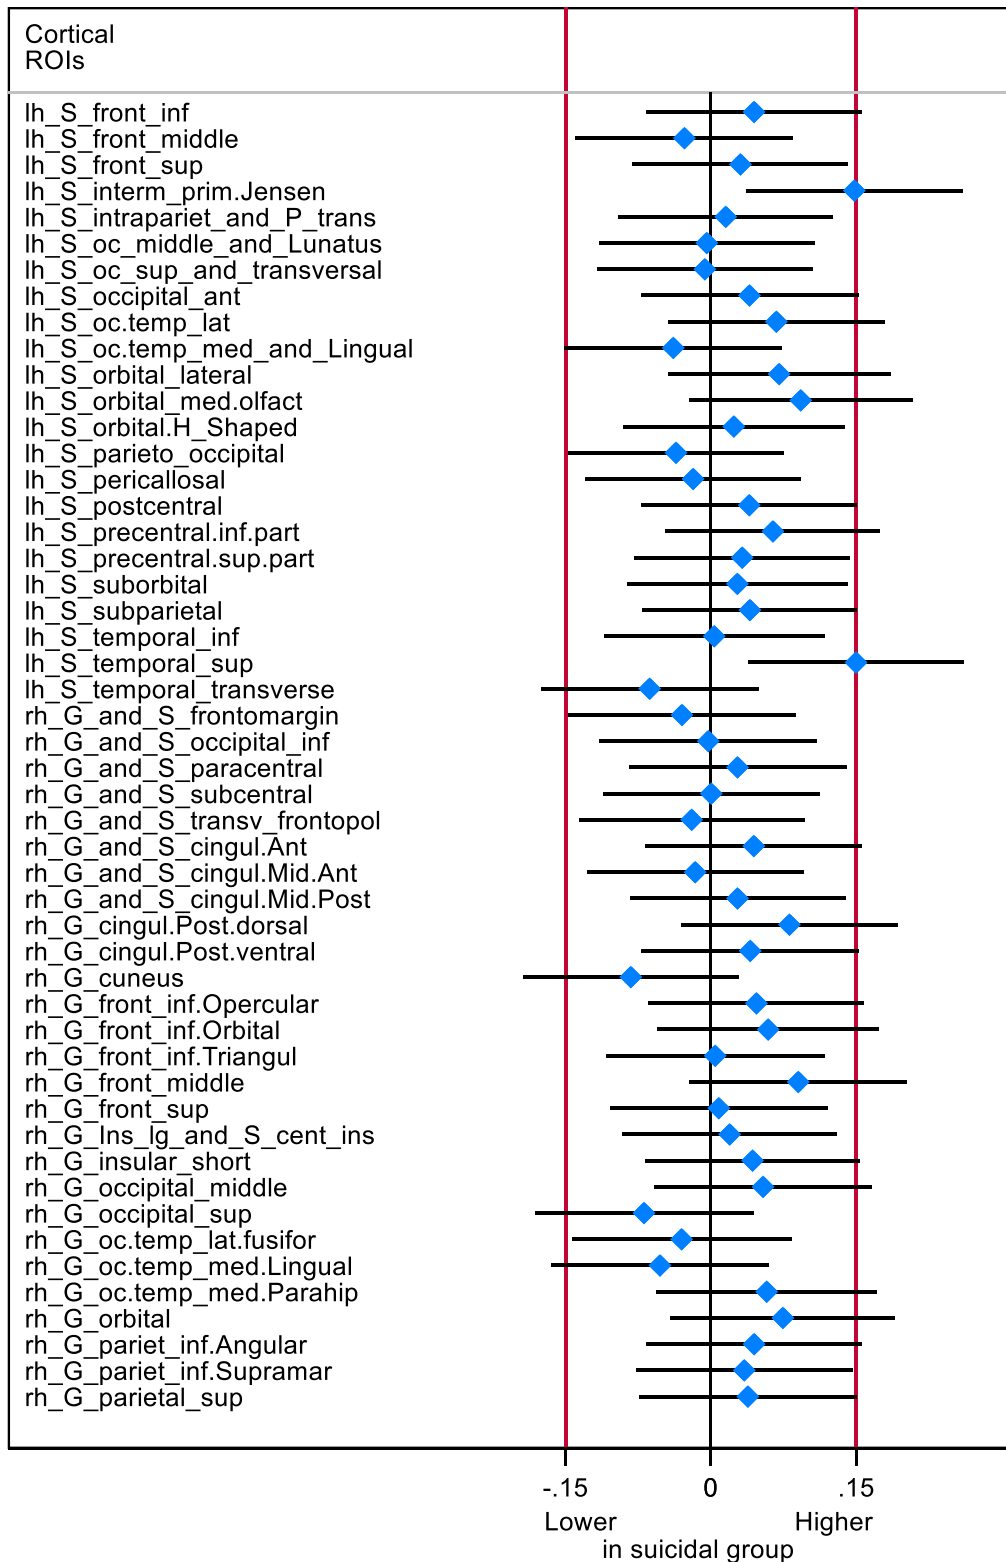

**eFigure 32 (2 of 3).** Results of the Equivalence test for differences in functional activity in cortical regions between the never-suicidal group and the caregiver-reported suicidality group for loss feedback. The figure shows the effect sizes and 95% confidence intervals of the difference against the interval of equivalence (-0.15 to 0.15).

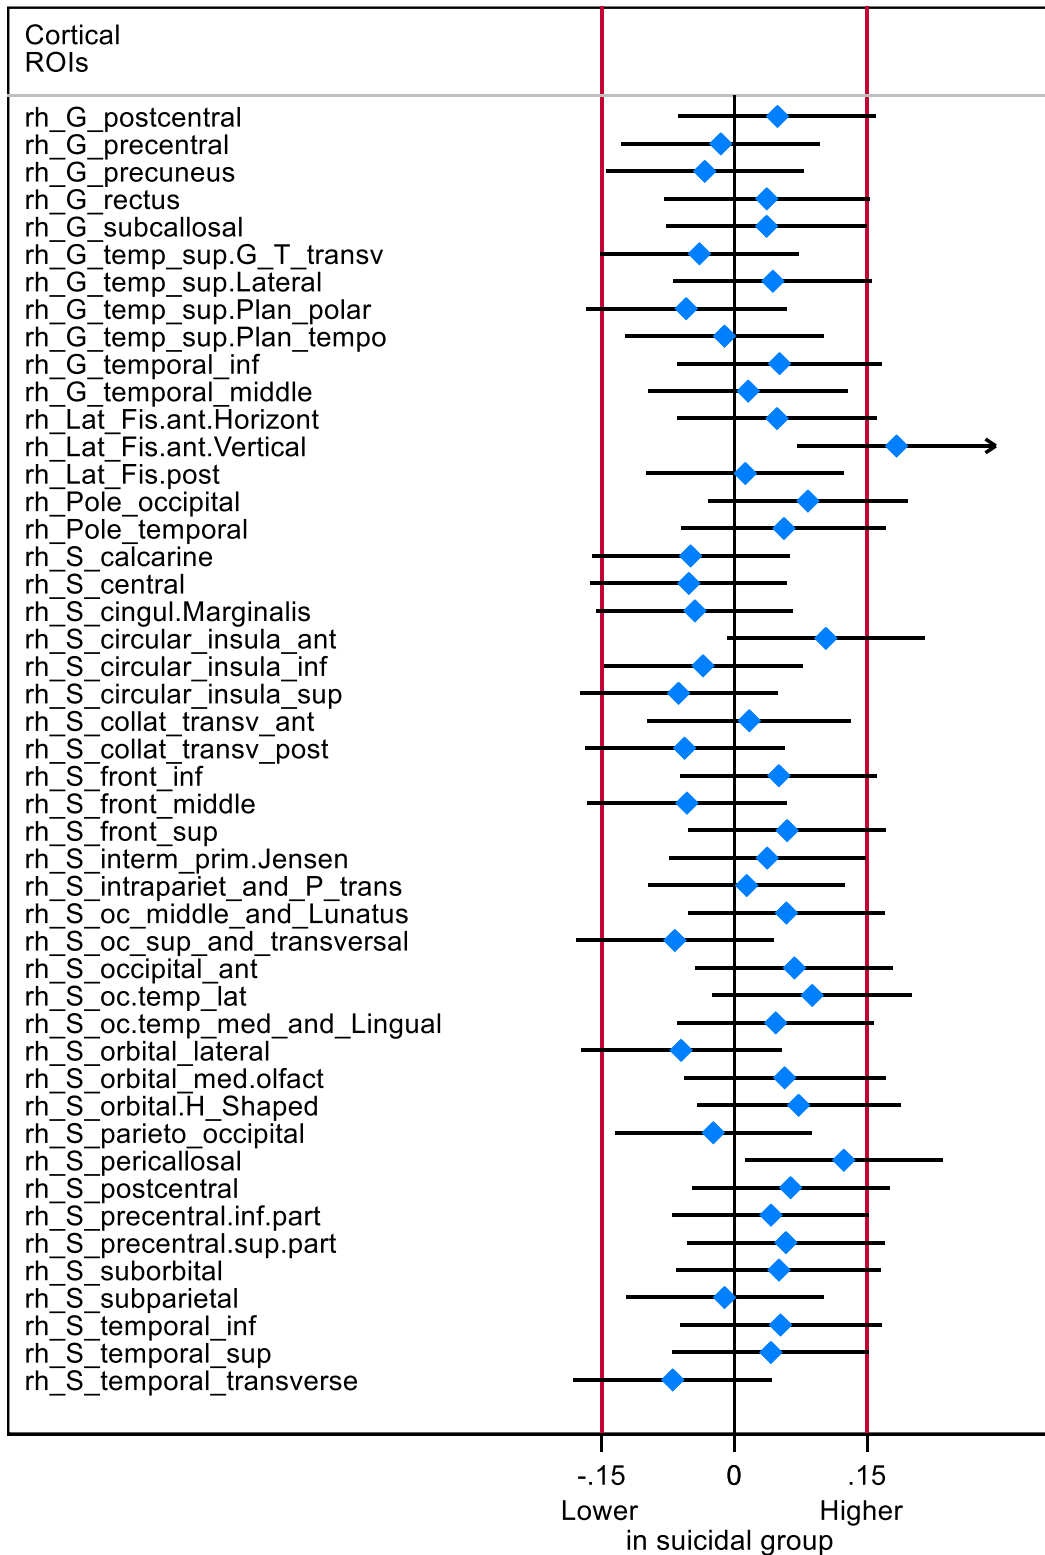

**eFigure 33 (3 of 3).** Results of the Equivalence test for differences in functional activity in cortical regions between the never-suicidal group and the caregiver-reported suicidality group for loss feedback. The figure shows the effect sizes and 95% confidence intervals of the difference against the interval of equivalence (-0.15 to 0.15).

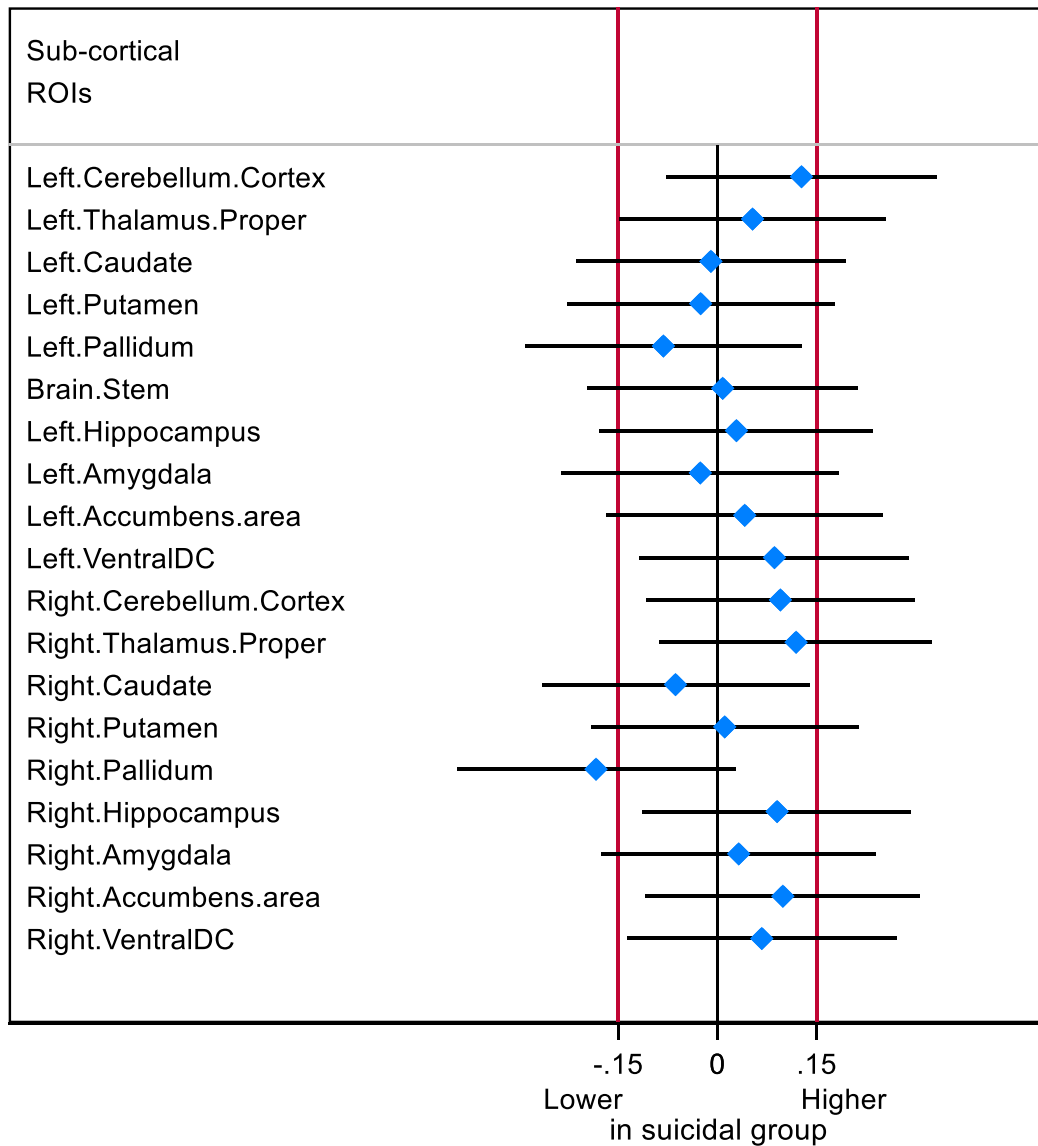

**eFigure 34.** Results of the Equivalence test for differences in functional activity in subcortical regions between the never-suicidal group and the concordantly-reported suicidality group for loss feedback. The figure shows the effect sizes and 95% confidence intervals of the difference against the interval of equivalence (-0.15 to 0.15).

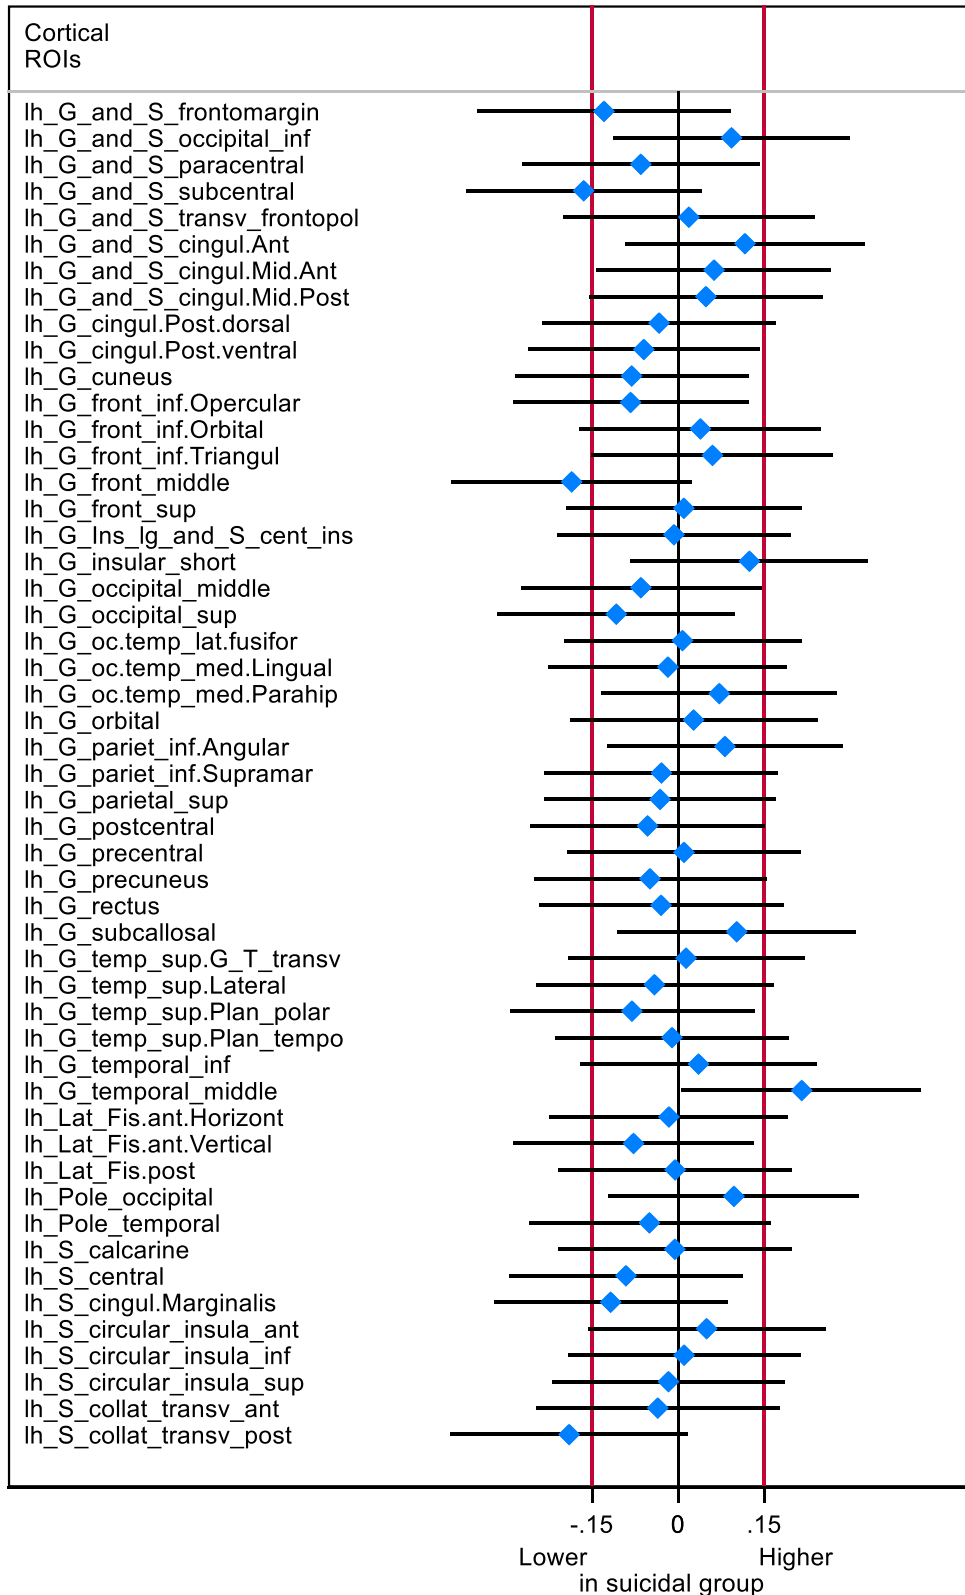

**eFigure 35 (1 of 3).** Results of the Equivalence test for differences in functional activity in cortical regions between the never-suicidal group and the concordantly-reported suicidality group for loss feedback. The figure shows the effect sizes and 95% confidence intervals of the difference against the interval of equivalence (-0.15 to 0.15).

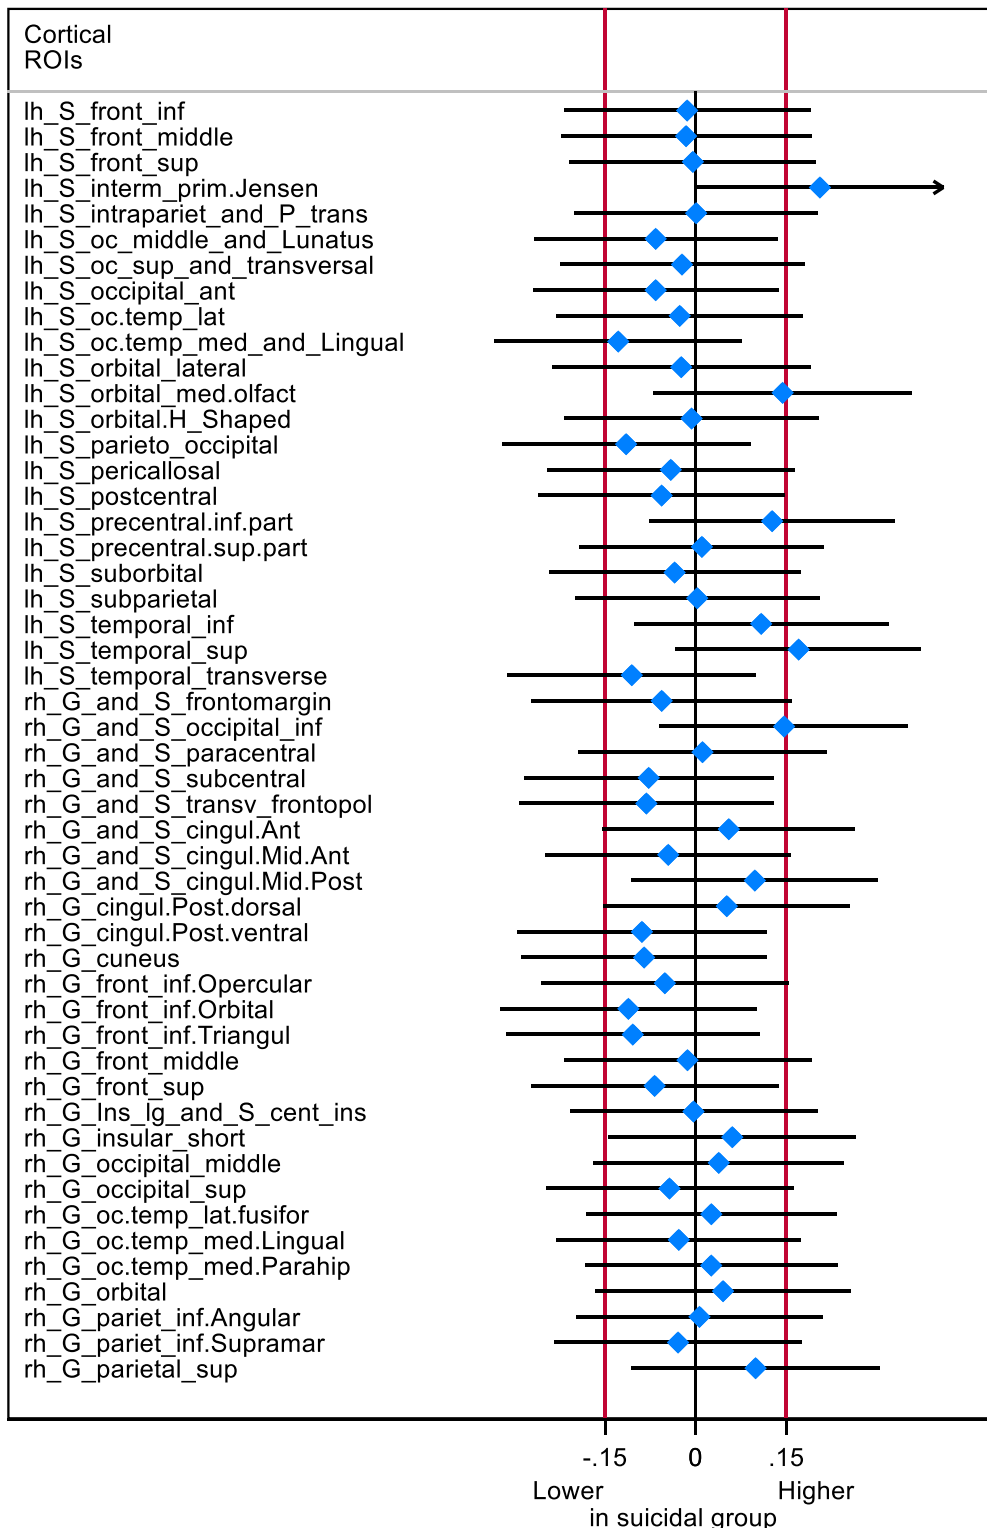

**eFigure 35 (2 of 3).** Results of the Equivalence test for differences in functional activity in cortical regions between the never-suicidal group and the concordantly-reported suicidality group for loss feedback. The figure shows the effect sizes and 95% confidence intervals of the difference against the interval of equivalence (-0.15 to 0.15).

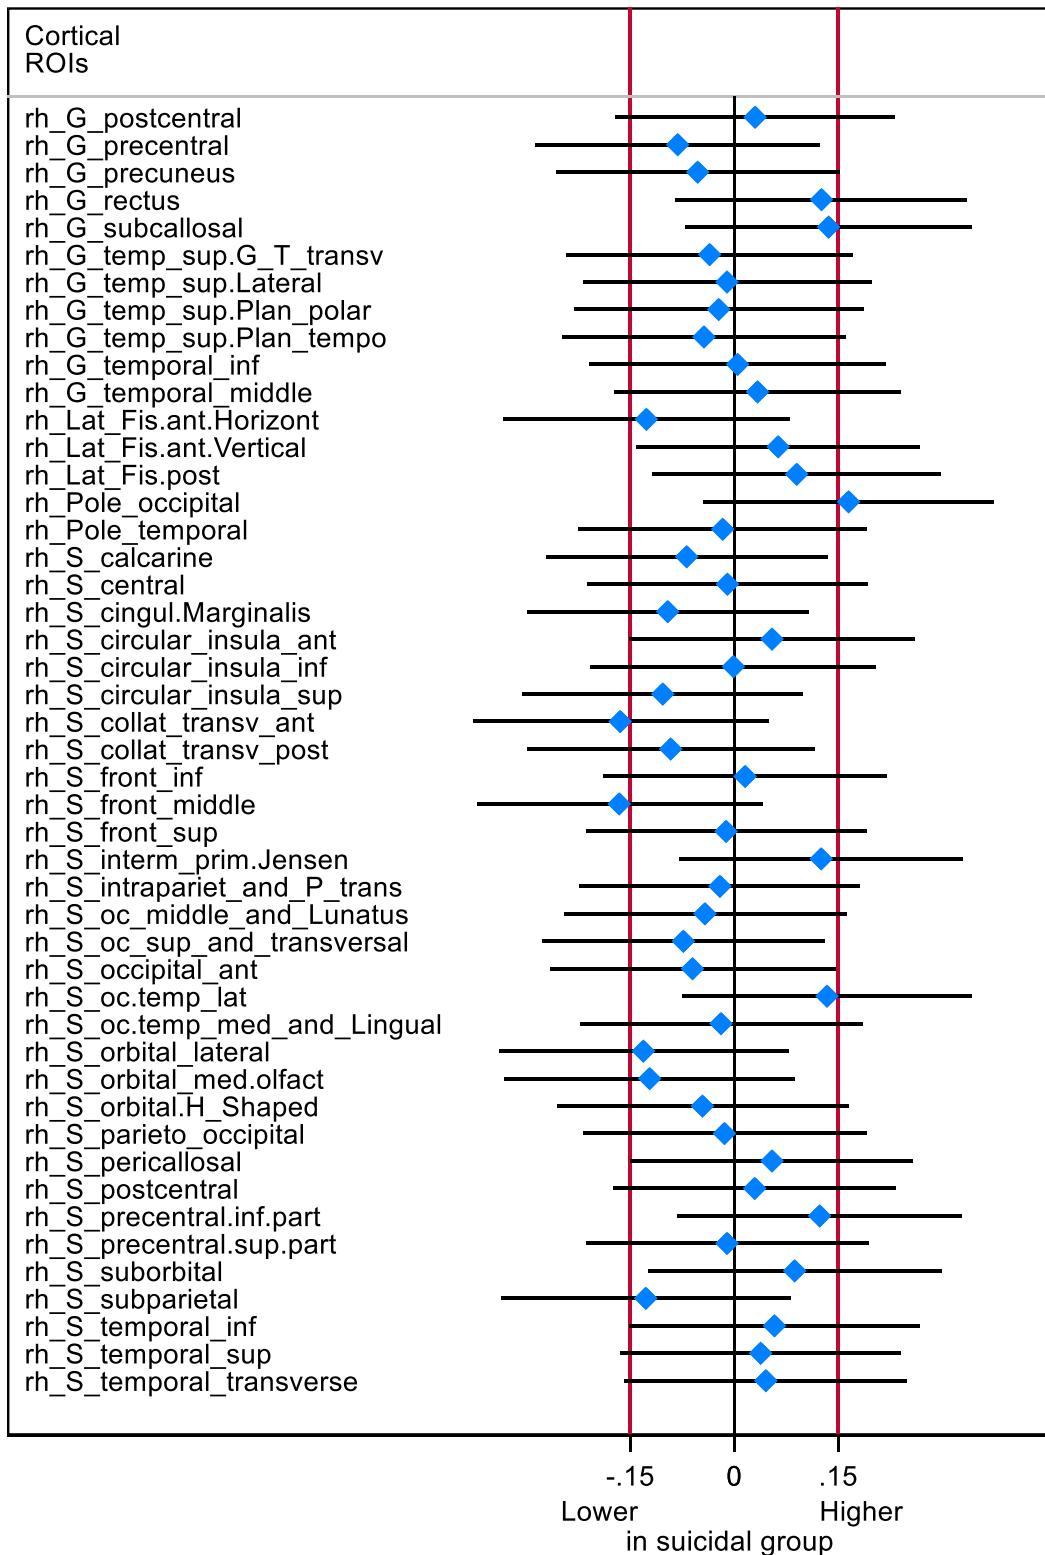

**eFigure 35 (3 of 3).** Results of the Equivalence test for differences in functional activity in cortical regions between the never-suicidal group and the concordantly-reported suicidality group for loss feedback. The figure shows the effect sizes and 95% confidence intervals of the difference against the interval of equivalence (-0.15 to 0.15).

## Stop Signal Task (SST)

### Incorrect stop vs correct go

| <b>eTable 23. Differences in functional activity between the never-suicidal group and the child-reported suicidality group for failed stops: Welch's t-test</b> |             |               |          |                |              |
|-----------------------------------------------------------------------------------------------------------------------------------------------------------------|-------------|---------------|----------|----------------|--------------|
| <b>ROIs</b>                                                                                                                                                     | <b>Mean</b> | <b>95%CI</b>  | <b>t</b> | <b>p (unc)</b> | <b>p FDR</b> |
| <b>Subcortical regions</b>                                                                                                                                      |             |               |          |                |              |
| Left.Cerebellum.Cortex                                                                                                                                          | -0.007      | -0.029, 0.016 | -0.59    | 0.554          | 0.988        |
| Left.Thalamus.Proper                                                                                                                                            | 0.000       | -0.011, 0.012 | 0.07     | 0.943          | 0.988        |
| Left.Caudate                                                                                                                                                    | 0.015       | -0.003, 0.032 | 1.68     | 0.093          | 0.988        |
| Left.Putamen                                                                                                                                                    | -0.002      | -0.016, 0.012 | -0.28    | 0.778          | 0.988        |
| Left.Pallidum                                                                                                                                                   | 0.006       | -0.005, 0.018 | 1.11     | 0.266          | 0.988        |
| Brain.Stem                                                                                                                                                      | -0.003      | -0.016, 0.01  | -0.39    | 0.698          | 0.988        |
| Left.Hippocampus                                                                                                                                                | 0.004       | -0.009, 0.017 | 0.60     | 0.551          | 0.988        |
| Left.Amygdala                                                                                                                                                   | 0.012       | -0.003, 0.026 | 1.56     | 0.120          | 0.988        |
| Left.Accumbens.area                                                                                                                                             | 0.006       | -0.012, 0.023 | 0.66     | 0.512          | 0.988        |
| Left.VentralDC                                                                                                                                                  | 0.006       | -0.008, 0.02  | 0.90     | 0.369          | 0.988        |
| Right.Cerebellum.Cortex                                                                                                                                         | 0.003       | -0.02, 0.025  | 0.25     | 0.802          | 0.988        |
| Right.Thalamus.Proper                                                                                                                                           | 0.003       | -0.01, 0.015  | 0.42     | 0.673          | 0.988        |
| Right.Caudate                                                                                                                                                   | 0.008       | -0.01, 0.025  | 0.86     | 0.391          | 0.988        |
| Right.Putamen                                                                                                                                                   | 0.000       | -0.015, 0.016 | 0.04     | 0.967          | 0.988        |
| Right.Pallidum                                                                                                                                                  | -0.009      | -0.021, 0.002 | -1.63    | 0.105          | 0.988        |
| Right.Hippocampus                                                                                                                                               | -0.001      | -0.014, 0.012 | -0.15    | 0.881          | 0.988        |
| Right.Amygdala                                                                                                                                                  | 0.009       | -0.007, 0.025 | 1.15     | 0.251          | 0.988        |
| Right.Accumbens.area                                                                                                                                            | -0.012      | -0.03, 0.006  | -1.34    | 0.182          | 0.988        |
| Right.VentralDC                                                                                                                                                 | 0.000       | -0.014, 0.014 | 0.02     | 0.983          | 0.989        |
| <b>Cortical regions</b>                                                                                                                                         |             |               |          |                |              |
| lh_G_and_S_frontomargin                                                                                                                                         | -0.009      | -0.037, 0.018 | -0.67    | 0.505          | 0.988        |
| lh_G_and_S_occipital_inf                                                                                                                                        | -0.011      | -0.034, 0.013 | -0.89    | 0.374          | 0.988        |
| lh_G_and_S_paracentral                                                                                                                                          | -0.013      | -0.031, 0.005 | -1.43    | 0.154          | 0.988        |
| lh_G_and_S_subcentral                                                                                                                                           | 0.000       | -0.016, 0.016 | 0.04     | 0.971          | 0.988        |
| lh_G_and_S_transv_frontopol                                                                                                                                     | 0.014       | -0.013, 0.04  | 1.03     | 0.304          | 0.988        |
| lh_G_and_S_cingul.Ant                                                                                                                                           | 0.007       | -0.009, 0.023 | 0.82     | 0.415          | 0.988        |
| lh_G_and_S_cingul.Mid.Ant                                                                                                                                       | 0.003       | -0.012, 0.017 | 0.36     | 0.721          | 0.988        |
| lh_G_and_S_cingul.Mid.Post                                                                                                                                      | 0.002       | -0.012, 0.016 | 0.27     | 0.788          | 0.988        |
| lh_G_cingul.Post.dorsal                                                                                                                                         | 0.017       | 0.001, 0.033  | 2.11     | <b>0.035</b>   | 0.988        |
| lh_G_cingul.Post.ventral                                                                                                                                        | 0.013       | -0.018, 0.045 | 0.82     | 0.413          | 0.988        |
| lh_G_cuneus                                                                                                                                                     | -0.022      | -0.045, 0.002 | -1.83    | 0.067          | 0.988        |
| lh_G_front_inf.Opercular                                                                                                                                        | 0.006       | -0.008, 0.02  | 0.83     | 0.409          | 0.988        |
| lh_G_front_inf.Orbital                                                                                                                                          | 0.005       | -0.019, 0.029 | 0.42     | 0.673          | 0.988        |

**eTable 23. Differences in functional activity between the never-suicidal group and the child-reported suicidality group for failed stops: Welch's t-test**

| ROIs                         | Mean   | 95%CI          | t     | p (unc)      | p FDR |
|------------------------------|--------|----------------|-------|--------------|-------|
| lh_G_front_inf.Triangul      | -0.002 | -0.022, 0.018  | -0.17 | 0.863        | 0.988 |
| lh_G_front_middle            | 0.006  | -0.009, 0.021  | 0.85  | 0.398        | 0.988 |
| lh_G_front_sup               | 0.007  | -0.004, 0.018  | 1.25  | 0.213        | 0.988 |
| lh_G_Ins_lg_and_S_cent_ins   | 0.003  | -0.012, 0.019  | 0.44  | 0.660        | 0.988 |
| lh_G_insular_short           | -0.002 | -0.015, 0.01   | -0.35 | 0.728        | 0.988 |
| lh_G_occipital_middle        | -0.003 | -0.02, 0.013   | -0.39 | 0.696        | 0.988 |
| lh_G_occipital_sup           | -0.023 | -0.042, -0.003 | -2.32 | <b>0.021</b> | 0.988 |
| lh_G_oc.temp_lat.fusifor     | -0.006 | -0.025, 0.013  | -0.61 | 0.542        | 0.988 |
| lh_G_oc.temp_med.Lingual     | -0.003 | -0.029, 0.022  | -0.26 | 0.798        | 0.988 |
| lh_G_oc.temp_med.Parahip     | 0.004  | -0.013, 0.021  | 0.46  | 0.646        | 0.988 |
| lh_G_orbital                 | -0.010 | -0.037, 0.016  | -0.75 | 0.451        | 0.988 |
| lh_G_pariet_inf.Angular      | 0.001  | -0.015, 0.017  | 0.13  | 0.895        | 0.988 |
| lh_G_pariet_inf.Supramar     | -0.002 | -0.016, 0.012  | -0.23 | 0.821        | 0.988 |
| lh_G_parietal_sup            | -0.001 | -0.017, 0.015  | -0.09 | 0.924        | 0.988 |
| lh_G_postcentral             | -0.004 | -0.021, 0.013  | -0.49 | 0.626        | 0.988 |
| lh_G_precentral              | 0.004  | -0.008, 0.016  | 0.60  | 0.550        | 0.988 |
| lh_G_precuneus               | -0.003 | -0.018, 0.012  | -0.41 | 0.684        | 0.988 |
| lh_G_rectus                  | -0.019 | -0.067, 0.029  | -0.78 | 0.434        | 0.988 |
| lh_G_subcallosal             | 0.009  | -0.017, 0.035  | 0.65  | 0.515        | 0.988 |
| lh_G_temp_sup.G_T_transv     | 0.003  | -0.013, 0.019  | 0.38  | 0.704        | 0.988 |
| lh_G_temp_sup.Lateral        | -0.004 | -0.017, 0.008  | -0.65 | 0.517        | 0.988 |
| lh_G_temp_sup.Plan_polar     | -0.002 | -0.013, 0.009  | -0.36 | 0.716        | 0.988 |
| lh_G_temp_sup.Plan_tempo     | 0.010  | -0.004, 0.024  | 1.38  | 0.170        | 0.988 |
| lh_G_temporal_inf            | -0.003 | -0.027, 0.02   | -0.29 | 0.775        | 0.988 |
| lh_G_temporal_middle         | -0.006 | -0.022, 0.01   | -0.72 | 0.473        | 0.988 |
| lh_Lat_Fis.ant.Horizontal    | 0.005  | -0.014, 0.024  | 0.50  | 0.619        | 0.988 |
| lh_Lat_Fis.ant.Vertical      | 0.003  | -0.021, 0.027  | 0.23  | 0.822        | 0.988 |
| lh_Lat_Fis.post              | -0.012 | -0.028, 0.004  | -1.45 | 0.149        | 0.988 |
| lh_Pole_occipital            | -0.006 | -0.036, 0.024  | -0.41 | 0.680        | 0.988 |
| lh_Pole_temporal             | 0.001  | -0.019, 0.02   | 0.06  | 0.956        | 0.988 |
| lh_S_calcarine               | -0.008 | -0.032, 0.016  | -0.66 | 0.507        | 0.988 |
| lh_S_central                 | -0.001 | -0.018, 0.017  | -0.10 | 0.924        | 0.988 |
| lh_S_cingul.Marginalis       | 0.010  | -0.004, 0.025  | 1.38  | 0.170        | 0.988 |
| lh_S_circular_insula_ant     | 0.004  | -0.013, 0.022  | 0.48  | 0.631        | 0.988 |
| lh_S_circular_insula_inf     | 0.002  | -0.011, 0.015  | 0.29  | 0.770        | 0.988 |
| lh_S_circular_insula_sup     | 0.007  | -0.009, 0.022  | 0.85  | 0.396        | 0.988 |
| lh_S_collat_transv_ant       | -0.003 | -0.025, 0.019  | -0.27 | 0.786        | 0.988 |
| lh_S_collat_transv_post      | 0.009  | -0.011, 0.029  | 0.87  | 0.386        | 0.988 |
| lh_S_front_inf               | 0.007  | -0.011, 0.026  | 0.76  | 0.445        | 0.988 |
| lh_S_front_middle            | 0.010  | -0.008, 0.028  | 1.10  | 0.274        | 0.988 |
| lh_S_front_sup               | 0.007  | -0.005, 0.02   | 1.16  | 0.245        | 0.988 |
| lh_S_interm_prim.Jensen      | 0.007  | -0.013, 0.026  | 0.66  | 0.508        | 0.988 |
| lh_S_intrapariet_and_P_trans | -0.008 | -0.026, 0.009  | -0.97 | 0.333        | 0.988 |



**eTable 23. Differences in functional activity between the never-suicidal group and the child-reported suicidality group for failed stops: Welch's t-test**

| ROIs                         | Mean   | 95%CI          | t     | p (unc)      | p FDR |
|------------------------------|--------|----------------|-------|--------------|-------|
| lh_S_oc_middle_and_Lunatus   | -0.017 | -0.04, 0.005   | -1.53 | 0.126        | 0.988 |
| lh_S_oc_sup_and_transversal  | -0.023 | -0.042, -0.005 | -2.54 | <b>0.011</b> | 0.988 |
| lh_S_occipital_ant           | -0.009 | -0.027, 0.009  | -0.98 | 0.328        | 0.988 |
| lh_S_oc.temp_lat             | -0.001 | -0.017, 0.015  | -0.13 | 0.895        | 0.988 |
| lh_S_oc.temp_med_and_Lingual | 0.007  | -0.008, 0.022  | 0.95  | 0.345        | 0.988 |
| lh_S_orbital_lateral         | 0.004  | -0.021, 0.029  | 0.32  | 0.753        | 0.988 |
| lh_S_orbital_med.olfact      | -0.030 | -0.067, 0.008  | -1.55 | 0.123        | 0.988 |
| lh_S_orbital.H_Shaped        | 0.003  | -0.017, 0.024  | 0.31  | 0.760        | 0.988 |
| lh_S_parieto_occipital       | 0.002  | -0.014, 0.018  | 0.23  | 0.820        | 0.988 |
| lh_S_pericallosal            | 0.004  | -0.015, 0.023  | 0.42  | 0.676        | 0.988 |
| lh_S_postcentral             | 0.000  | -0.015, 0.014  | -0.06 | 0.953        | 0.988 |
| lh_S_precentral.inf.part     | 0.004  | -0.013, 0.021  | 0.47  | 0.635        | 0.988 |
| lh_S_precentral.sup.part     | -0.004 | -0.018, 0.01   | -0.57 | 0.571        | 0.988 |
| lh_S_suborbital              | -0.007 | -0.042, 0.028  | -0.40 | 0.686        | 0.988 |
| lh_S_subparietal             | 0.002  | -0.017, 0.022  | 0.25  | 0.804        | 0.988 |
| lh_S_temporal_inf            | -0.010 | -0.032, 0.012  | -0.87 | 0.383        | 0.988 |
| lh_S_temporal_sup            | -0.003 | -0.016, 0.011  | -0.39 | 0.698        | 0.988 |
| lh_S_temporal_transverse     | 0.005  | -0.015, 0.025  | 0.46  | 0.646        | 0.988 |
| rh_G_and_S_frontomargin      | -0.003 | -0.032, 0.026  | -0.23 | 0.819        | 0.988 |
| rh_G_and_S_occipital_inf     | -0.011 | -0.033, 0.011  | -0.95 | 0.342        | 0.988 |
| rh_G_and_S_paracentral       | -0.012 | -0.031, 0.007  | -1.24 | 0.215        | 0.988 |
| rh_G_and_S_subcentral        | 0.005  | -0.012, 0.022  | 0.56  | 0.576        | 0.988 |
| rh_G_and_S_transv_frontopol  | 0.003  | -0.023, 0.028  | 0.21  | 0.835        | 0.988 |
| rh_G_and_S_cingul.Ant        | 0.009  | -0.008, 0.026  | 1.07  | 0.285        | 0.988 |
| rh_G_and_S_cingul.Mid.Ant    | 0.002  | -0.012, 0.017  | 0.32  | 0.753        | 0.988 |
| rh_G_and_S_cingul.Mid.Post   | 0.000  | -0.013, 0.012  | -0.03 | 0.976        | 0.988 |
| rh_G_cingul.Post.dorsal      | 0.006  | -0.01, 0.022   | 0.70  | 0.482        | 0.988 |
| rh_G_cingul.Post.ventral     | -0.001 | -0.026, 0.024  | -0.08 | 0.938        | 0.988 |
| rh_G_cuneus                  | -0.002 | -0.025, 0.021  | -0.19 | 0.849        | 0.988 |
| rh_G_front_inf.Opercular     | 0.005  | -0.011, 0.02   | 0.57  | 0.571        | 0.988 |
| rh_G_front_inf.Orbital       | -0.010 | -0.032, 0.012  | -0.88 | 0.382        | 0.988 |
| rh_G_front_inf.Triangul      | 0.000  | -0.019, 0.018  | -0.03 | 0.977        | 0.988 |
| rh_G_front_middle            | -0.001 | -0.018, 0.015  | -0.16 | 0.872        | 0.988 |
| rh_G_front_sup               | 0.000  | -0.011, 0.011  | -0.04 | 0.969        | 0.988 |
| rh_G_Ins_lg_and_S_cent_ins   | 0.003  | -0.012, 0.019  | 0.44  | 0.663        | 0.988 |
| rh_G_insular_short           | -0.001 | -0.016, 0.014  | -0.15 | 0.879        | 0.988 |
| rh_G_occipital_middle        | -0.002 | -0.019, 0.014  | -0.28 | 0.780        | 0.988 |
| rh_G_occipital_sup           | -0.008 | -0.026, 0.011  | -0.80 | 0.426        | 0.988 |
| rh_G_oc.temp_lat.fusifor     | 0.009  | -0.01, 0.028   | 0.92  | 0.356        | 0.988 |
| rh_G_oc.temp_med.Lingual     | -0.005 | -0.031, 0.021  | -0.39 | 0.695        | 0.988 |
| rh_G_oc.temp_med.Parahip     | -0.005 | -0.024, 0.014  | -0.49 | 0.622        | 0.988 |
| rh_G_orbital                 | 0.002  | -0.023, 0.028  | 0.18  | 0.856        | 0.988 |
| rh_G_pariet_inf.Angular      | 0.002  | -0.014, 0.017  | 0.21  | 0.836        | 0.988 |

**eTable 23. Differences in functional activity between the never-suicidal group and the child-reported suicidality group for failed stops: Welch's t-test**

| ROIs                         | Mean   | 95%CI         | t     | p (unc) | p FDR |
|------------------------------|--------|---------------|-------|---------|-------|
| rh_G_pariet_inf.Supramar     | -0.001 | -0.015, 0.013 | -0.14 | 0.889   | 0.988 |
| rh_G_parietal_sup            | -0.003 | -0.018, 0.013 | -0.35 | 0.723   | 0.988 |
| rh_G_postcentral             | -0.004 | -0.02, 0.013  | -0.42 | 0.672   | 0.988 |
| rh_G_precentral              | 0.005  | -0.007, 0.017 | 0.87  | 0.384   | 0.988 |
| rh_G_precuneus               | 0.006  | -0.011, 0.022 | 0.68  | 0.496   | 0.988 |
| rh_G_rectus                  | -0.010 | -0.067, 0.047 | -0.34 | 0.737   | 0.988 |
| rh_G_subcallosal             | 0.008  | -0.019, 0.034 | 0.56  | 0.575   | 0.988 |
| rh_G_temp_sup.G_T_transv     | 0.010  | -0.007, 0.026 | 1.16  | 0.248   | 0.988 |
| rh_G_temp_sup.Lateral        | 0.004  | -0.009, 0.016 | 0.55  | 0.580   | 0.988 |
| rh_G_temp_sup.Plan_polar     | -0.007 | -0.019, 0.005 | -1.10 | 0.270   | 0.988 |
| rh_G_temp_sup.Plan_tempo     | 0.004  | -0.011, 0.02  | 0.55  | 0.584   | 0.988 |
| rh_G_temporal_inf            | 0.001  | -0.022, 0.024 | 0.11  | 0.914   | 0.988 |
| rh_G_temporal_middle         | -0.004 | -0.021, 0.012 | -0.51 | 0.612   | 0.988 |
| rh_Lat_Fis.ant.Horizontal    | 0.007  | -0.013, 0.027 | 0.67  | 0.506   | 0.988 |
| rh_Lat_Fis.ant.Vertical      | -0.011 | -0.035, 0.013 | -0.90 | 0.368   | 0.988 |
| rh_Lat_Fis.post              | 0.001  | -0.018, 0.02  | 0.09  | 0.931   | 0.988 |
| rh_Pole_occipital            | 0.004  | -0.025, 0.032 | 0.24  | 0.811   | 0.988 |
| rh_Pole_temporal             | 0.012  | -0.01, 0.034  | 1.08  | 0.279   | 0.988 |
| rh_S_calcarine               | -0.006 | -0.029, 0.017 | -0.49 | 0.623   | 0.988 |
| rh_S_central                 | 0.001  | -0.016, 0.018 | 0.09  | 0.928   | 0.988 |
| rh_S_cingul.Marginalis       | 0.004  | -0.01, 0.018  | 0.60  | 0.548   | 0.988 |
| rh_S_circular_insula_ant     | -0.002 | -0.019, 0.016 | -0.21 | 0.837   | 0.988 |
| rh_S_circular_insula_inf     | 0.002  | -0.012, 0.017 | 0.28  | 0.781   | 0.988 |
| rh_S_circular_insula_sup     | -0.002 | -0.018, 0.014 | -0.27 | 0.787   | 0.988 |
| rh_S_collat_transv_ant       | -0.016 | -0.04, 0.008  | -1.29 | 0.200   | 0.988 |
| rh_S_collat_transv_post      | -0.011 | -0.031, 0.009 | -1.09 | 0.274   | 0.988 |
| rh_S_front_inf               | -0.004 | -0.022, 0.014 | -0.48 | 0.632   | 0.988 |
| rh_S_front_middle            | 0.008  | -0.011, 0.026 | 0.83  | 0.407   | 0.988 |
| rh_S_front_sup               | 0.000  | -0.013, 0.013 | 0.03  | 0.975   | 0.988 |
| rh_S_interm_prim.Jensen      | -0.002 | -0.022, 0.017 | -0.25 | 0.806   | 0.988 |
| rh_S_intrapariet_and_P_trans | -0.004 | -0.021, 0.013 | -0.43 | 0.666   | 0.988 |
| rh_S_oc_middle_and_Lunatus   | -0.019 | -0.04, 0.002  | -1.76 | 0.079   | 0.988 |
| rh_S_oc_sup_and_transversal  | -0.015 | -0.033, 0.003 | -1.65 | 0.099   | 0.988 |
| rh_S_occipital_ant           | -0.005 | -0.022, 0.012 | -0.59 | 0.558   | 0.988 |
| rh_S_oc.temp_lat             | -0.015 | -0.031, 0     | -1.94 | 0.053   | 0.988 |
| rh_S_oc.temp_med_and_Lingual | -0.006 | -0.02, 0.007  | -0.92 | 0.357   | 0.988 |
| rh_S_orbital_lateral         | -0.015 | -0.04, 0.009  | -1.22 | 0.223   | 0.988 |
| rh_S_orbital_med.olfact      | 0.002  | -0.039, 0.044 | 0.12  | 0.905   | 0.988 |
| rh_S_orbital.H_Shaped        | -0.009 | -0.03, 0.012  | -0.81 | 0.417   | 0.988 |
| rh_S_parieto_occipital       | -0.007 | -0.024, 0.01  | -0.84 | 0.401   | 0.988 |
| rh_S_pericallosal            | 0.006  | -0.015, 0.028 | 0.56  | 0.579   | 0.988 |
| rh_S_postcentral             | 0.002  | -0.011, 0.016 | 0.33  | 0.739   | 0.988 |
| rh_S_precentral.inf.part     | -0.006 | -0.024, 0.012 | -0.62 | 0.533   | 0.988 |

**eTable 23. Differences in functional activity between the never-suicidal group and the child-reported suicidality group for failed stops: Welch's t-test**

| ROIs                     | Mean   | 95%CI          | t     | p (unc)      | p FDR |
|--------------------------|--------|----------------|-------|--------------|-------|
| rh_S_precentral.sup.part | 0.003  | -0.011, 0.016  | 0.36  | 0.721        | 0.988 |
| rh_S_suborbital          | -0.018 | -0.066, 0.03   | -0.73 | 0.464        | 0.988 |
| rh_S_subparietal         | 0.006  | -0.011, 0.023  | 0.66  | 0.511        | 0.988 |
| rh_S_temporal_inf        | -0.029 | -0.053, -0.005 | -2.38 | <b>0.018</b> | 0.988 |
| rh_S_temporal_sup        | 0.000  | -0.013, 0.013  | -0.01 | 0.992        | 0.992 |
| rh_S_temporal_transverse | -0.007 | -0.029, 0.014  | -0.68 | 0.498        | 0.988 |

**Bold** denotes group differences at p<0.05 uncorrected

**eTable 24. Differences in functional activity between the never-suicidal group and the caregiver-reported suicidality group for failed stops: Welch's t-test**

| ROIs                        | Mean   | 95%CI         | t     | p (unc) | p FDR |
|-----------------------------|--------|---------------|-------|---------|-------|
| <b>Subcortical regions</b>  |        |               |       |         |       |
| Left.Cerebellum.Cortex      | 0.011  | -0.011, 0.032 | 0.96  | 0.337   | 0.910 |
| Left.Thalamus.Proper        | -0.004 | -0.015, 0.008 | -0.62 | 0.532   | 0.910 |
| Left.Caudate                | -0.010 | -0.027, 0.007 | -1.18 | 0.238   | 0.910 |
| Left.Putamen                | -0.004 | -0.017, 0.009 | -0.57 | 0.566   | 0.910 |
| Left.Pallidum               | -0.003 | -0.015, 0.009 | -0.53 | 0.597   | 0.910 |
| Brain.Stem                  | 0.004  | -0.009, 0.017 | 0.55  | 0.584   | 0.910 |
| Left.Hippocampus            | 0.005  | -0.009, 0.018 | 0.72  | 0.474   | 0.910 |
| Left.Amygdala               | 0.004  | -0.011, 0.018 | 0.49  | 0.624   | 0.921 |
| Left.Accumbens.area         | -0.005 | -0.023, 0.014 | -0.51 | 0.609   | 0.910 |
| Left.VentralDC              | -0.005 | -0.017, 0.008 | -0.70 | 0.483   | 0.910 |
| Right.Cerebellum.Cortex     | 0.014  | -0.009, 0.037 | 1.17  | 0.245   | 0.910 |
| Right.Thalamus.Proper       | -0.003 | -0.015, 0.009 | -0.53 | 0.597   | 0.910 |
| Right.Caudate               | -0.013 | -0.031, 0.005 | -1.40 | 0.161   | 0.910 |
| Right.Putamen               | -0.003 | -0.017, 0.011 | -0.37 | 0.711   | 0.935 |
| Right.Pallidum              | -0.010 | -0.022, 0.001 | -1.81 | 0.072   | 0.910 |
| Right.Hippocampus           | -0.002 | -0.015, 0.011 | -0.25 | 0.803   | 0.974 |
| Right.Amygdala              | 0.013  | -0.003, 0.03  | 1.57  | 0.116   | 0.910 |
| Right.Accumbens.area        | -0.008 | -0.025, 0.009 | -0.90 | 0.370   | 0.910 |
| Right.VentralDC             | 0.004  | -0.009, 0.017 | 0.60  | 0.551   | 0.910 |
| <b>Cortical regions</b>     |        |               |       |         |       |
| lh_G_and_S_frontomargin     | 0.013  | -0.016, 0.043 | 0.90  | 0.371   | 0.910 |
| lh_G_and_S_occipital_inf    | -0.009 | -0.032, 0.014 | -0.80 | 0.423   | 0.910 |
| lh_G_and_S_paracentral      | -0.011 | -0.028, 0.006 | -1.23 | 0.220   | 0.910 |
| lh_G_and_S_subcentral       | -0.004 | -0.019, 0.012 | -0.45 | 0.656   | 0.924 |
| lh_G_and_S_transv_frontopol | 0.013  | -0.016, 0.042 | 0.87  | 0.386   | 0.910 |
| lh_G_and_S_cingul.Ant       | 0.000  | -0.017, 0.016 | -0.05 | 0.958   | 0.993 |
| lh_G_and_S_cingul.Mid.Ant   | -0.011 | -0.025, 0.004 | -1.43 | 0.153   | 0.910 |
| lh_G_and_S_cingul.Mid.Post  | -0.001 | -0.014, 0.012 | -0.15 | 0.883   | 0.974 |

**eTable 24. Differences in functional activity between the never-suicidal group and the caregiver-reported suicidality group for failed stops: Welch's t-test**

| ROIs                       | Mean   | 95%CI         | t     | p (unc) | p FDR |
|----------------------------|--------|---------------|-------|---------|-------|
| lh_G_cingul.Post.dorsal    | 0.010  | -0.007, 0.027 | 1.13  | 0.258   | 0.910 |
| lh_G_cingul.Post.ventral   | -0.010 | -0.044, 0.024 | -0.60 | 0.550   | 0.910 |
| lh_G_cuneus                | -0.013 | -0.036, 0.009 | -1.15 | 0.249   | 0.910 |
| lh_G_front_inf.Opercular   | -0.008 | -0.022, 0.006 | -1.14 | 0.257   | 0.910 |
| lh_G_front_inf.Orbital     | -0.009 | -0.031, 0.014 | -0.77 | 0.445   | 0.910 |
| lh_G_front_inf.Triangul    | -0.004 | -0.023, 0.015 | -0.39 | 0.700   | 0.935 |
| lh_G_front_middle          | 0.000  | -0.015, 0.016 | 0.05  | 0.964   | 0.993 |
| lh_G_front_sup             | -0.005 | -0.016, 0.007 | -0.81 | 0.421   | 0.910 |
| lh_G_Ins_lg_and_S_cent_ins | 0.007  | -0.007, 0.022 | 0.99  | 0.323   | 0.910 |
| lh_G_insular_short         | -0.006 | -0.019, 0.007 | -0.94 | 0.347   | 0.910 |
| lh_G_occipital_middle      | -0.005 | -0.021, 0.012 | -0.53 | 0.594   | 0.910 |
| lh_G_occipital_sup         | -0.012 | -0.031, 0.007 | -1.24 | 0.216   | 0.910 |
| lh_G_oc.temp_lat.fusifor   | -0.005 | -0.024, 0.014 | -0.53 | 0.596   | 0.910 |
| lh_G_oc.temp_med.Lingual   | 0.013  | -0.012, 0.038 | 0.99  | 0.320   | 0.910 |
| lh_G_oc.temp_med.Parahip   | 0.001  | -0.016, 0.018 | 0.12  | 0.903   | 0.974 |
| lh_G_orbital               | -0.006 | -0.035, 0.023 | -0.41 | 0.680   | 0.931 |
| lh_G_pariet_inf.Angular    | 0.006  | -0.01, 0.023  | 0.73  | 0.468   | 0.910 |
| lh_G_pariet_inf.Supramar   | 0.004  | -0.01, 0.017  | 0.55  | 0.585   | 0.910 |
| lh_G_parietal_sup          | -0.002 | -0.017, 0.013 | -0.29 | 0.773   | 0.972 |
| lh_G_postcentral           | -0.005 | -0.021, 0.011 | -0.58 | 0.561   | 0.910 |
| lh_G_precentral            | -0.005 | -0.017, 0.006 | -0.91 | 0.364   | 0.910 |
| lh_G_precuneus             | 0.010  | -0.005, 0.025 | 1.30  | 0.194   | 0.910 |
| lh_G_rectus                | 0.018  | -0.032, 0.067 | 0.70  | 0.485   | 0.910 |
| lh_G_subcallosal           | 0.020  | -0.006, 0.045 | 1.53  | 0.128   | 0.910 |
| lh_G_temp_sup.G_T_transv   | 0.004  | -0.01, 0.019  | 0.59  | 0.552   | 0.910 |
| lh_G_temp_sup.Lateral      | -0.005 | -0.017, 0.008 | -0.73 | 0.467   | 0.910 |
| lh_G_temp_sup.Plan_polar   | 0.002  | -0.01, 0.013  | 0.28  | 0.777   | 0.972 |
| lh_G_temp_sup.Plan_tempo   | 0.010  | -0.005, 0.025 | 1.32  | 0.188   | 0.910 |
| lh_G_temporal_inf          | 0.006  | -0.018, 0.029 | 0.48  | 0.629   | 0.921 |
| lh_G_temporal_middle       | -0.004 | -0.02, 0.013  | -0.44 | 0.662   | 0.924 |
| lh_Lat_Fis.ant.Horizontal  | -0.009 | -0.03, 0.011  | -0.91 | 0.364   | 0.910 |
| lh_Lat_Fis.ant.Vertical    | -0.001 | -0.026, 0.023 | -0.12 | 0.905   | 0.974 |
| lh_Lat_Fis.post            | -0.004 | -0.02, 0.012  | -0.51 | 0.610   | 0.910 |
| lh_Pole_occipital          | 0.012  | -0.016, 0.039 | 0.85  | 0.398   | 0.910 |
| lh_Pole_temporal           | 0.017  | -0.005, 0.038 | 1.53  | 0.128   | 0.910 |
| lh_S_calcarine             | -0.011 | -0.034, 0.012 | -0.96 | 0.335   | 0.910 |
| lh_S_central               | 0.004  | -0.014, 0.022 | 0.44  | 0.663   | 0.924 |
| lh_S_cingul.Marginalis     | 0.009  | -0.005, 0.024 | 1.24  | 0.214   | 0.910 |
| lh_S_circular_insula_ant   | -0.002 | -0.019, 0.016 | -0.18 | 0.859   | 0.974 |
| lh_S_circular_insula_inf   | -0.006 | -0.018, 0.007 | -0.90 | 0.370   | 0.910 |
| lh_S_circular_insula_sup   | -0.001 | -0.016, 0.014 | -0.12 | 0.901   | 0.974 |
| lh_S_collat_transv_ant     | -0.013 | -0.036, 0.011 | -1.06 | 0.290   | 0.910 |
| lh_S_collat_transv_post    | -0.002 | -0.022, 0.017 | -0.26 | 0.798   | 0.974 |

**eTable 24. Differences in functional activity between the never-suicidal group and the caregiver-reported suicidality group for failed stops: Welch's t-test**

| ROIs                         | Mean   | 95%CI          | t     | p (unc)      | p FDR |
|------------------------------|--------|----------------|-------|--------------|-------|
| lh_S_front_inf               | 0.002  | -0.015, 0.02   | 0.25  | 0.806        | 0.974 |
| lh_S_front_middle            | 0.006  | -0.012, 0.024  | 0.63  | 0.531        | 0.910 |
| lh_S_front_sup               | 0.001  | -0.012, 0.015  | 0.23  | 0.821        | 0.974 |
| lh_S_interm_prim.Jensen      | 0.006  | -0.014, 0.027  | 0.60  | 0.547        | 0.910 |
| lh_S_intrapariet_and_P_trans | 0.008  | -0.008, 0.025  | 0.99  | 0.321        | 0.910 |
| lh_S_oc_middle_and_Lunatus   | -0.025 | -0.046, -0.005 | -2.46 | <b>0.014</b> | 0.910 |
| lh_S_oc_sup_and_transversal  | -0.006 | -0.024, 0.012  | -0.64 | 0.525        | 0.910 |
| lh_S_occipital_ant           | -0.008 | -0.026, 0.01   | -0.87 | 0.383        | 0.910 |
| lh_S_oc.temp_lat             | 0.002  | -0.013, 0.017  | 0.28  | 0.780        | 0.972 |
| lh_S_oc.temp_med_and_Lingual | 0.004  | -0.01, 0.018   | 0.62  | 0.533        | 0.910 |
| lh_S_orbital_lateral         | -0.011 | -0.038, 0.015  | -0.84 | 0.403        | 0.910 |
| lh_S_orbital_med.olfact      | -0.032 | -0.074, 0.01   | -1.52 | 0.131        | 0.910 |
| lh_S_orbital.H_Shaped        | 0.005  | -0.016, 0.026  | 0.47  | 0.637        | 0.924 |
| lh_S_parieto_occipital       | 0.014  | -0.002, 0.03   | 1.70  | 0.090        | 0.910 |
| lh_S_pericallosal            | 0.000  | -0.019, 0.018  | -0.04 | 0.969        | 0.993 |
| lh_S_postcentral             | 0.001  | -0.012, 0.014  | 0.16  | 0.871        | 0.974 |
| lh_S_precentral.inf.part     | 0.009  | -0.008, 0.026  | 1.08  | 0.283        | 0.910 |
| lh_S_precentral.sup.part     | -0.004 | -0.018, 0.009  | -0.60 | 0.550        | 0.910 |
| lh_S_suborbital              | 0.013  | -0.023, 0.05   | 0.72  | 0.472        | 0.910 |
| lh_S_subparietal             | 0.007  | -0.013, 0.027  | 0.71  | 0.478        | 0.910 |
| lh_S_temporal_inf            | -0.014 | -0.037, 0.009  | -1.17 | 0.242        | 0.910 |
| lh_S_temporal_sup            | -0.003 | -0.016, 0.011  | -0.38 | 0.706        | 0.935 |
| lh_S_temporal_transverse     | 0.008  | -0.013, 0.029  | 0.75  | 0.452        | 0.910 |
| rh_G_and_S_frontomargin      | -0.002 | -0.035, 0.03   | -0.14 | 0.886        | 0.974 |
| rh_G_and_S_occipital_inf     | -0.002 | -0.025, 0.02   | -0.21 | 0.831        | 0.974 |
| rh_G_and_S_paracentral       | 0.000  | -0.018, 0.018  | -0.01 | 0.993        | 0.993 |
| rh_G_and_S_subcentral        | 0.006  | -0.011, 0.022  | 0.67  | 0.502        | 0.910 |
| rh_G_and_S_transv_frontopol  | -0.016 | -0.04, 0.008   | -1.29 | 0.199        | 0.910 |
| rh_G_and_S_cingul.Ant        | -0.001 | -0.018, 0.016  | -0.15 | 0.882        | 0.974 |
| rh_G_and_S_cingul.Mid.Ant    | 0.004  | -0.01, 0.018   | 0.53  | 0.596        | 0.910 |
| rh_G_and_S_cingul.Mid.Post   | 0.007  | -0.005, 0.019  | 1.21  | 0.227        | 0.910 |
| rh_G_cingul.Post.dorsal      | 0.001  | -0.015, 0.017  | 0.11  | 0.915        | 0.974 |
| rh_G_cingul.Post.ventral     | -0.002 | -0.028, 0.025  | -0.11 | 0.910        | 0.974 |
| rh_G_cuneus                  | -0.002 | -0.025, 0.021  | -0.19 | 0.849        | 0.974 |
| rh_G_front_inf.Opercular     | -0.010 | -0.025, 0.005  | -1.32 | 0.187        | 0.910 |
| rh_G_front_inf.Orbital       | -0.014 | -0.037, 0.009  | -1.23 | 0.220        | 0.910 |
| rh_G_front_inf.Triangul      | -0.006 | -0.024, 0.012  | -0.70 | 0.487        | 0.910 |
| rh_G_front_middle            | -0.013 | -0.029, 0.003  | -1.59 | 0.114        | 0.910 |
| rh_G_front_sup               | -0.004 | -0.016, 0.008  | -0.66 | 0.509        | 0.910 |
| rh_G_Ins_lg_and_S_cent_ins   | 0.003  | -0.012, 0.018  | 0.36  | 0.723        | 0.940 |
| rh_G_insular_short           | 0.000  | -0.014, 0.013  | -0.06 | 0.954        | 0.993 |
| rh_G_occipital_middle        | 0.000  | -0.016, 0.017  | 0.01  | 0.991        | 0.993 |
| rh_G_occipital_sup           | 0.005  | -0.013, 0.023  | 0.55  | 0.582        | 0.910 |

**eTable 24. Differences in functional activity between the never-suicidal group and the caregiver-reported suicidality group for failed stops: Welch's t-test**

| ROIs                         | Mean   | 95%CI          | t     | p (unc)      | p FDR |
|------------------------------|--------|----------------|-------|--------------|-------|
| rh_G_oc.temp_lat.fusifor     | 0.006  | -0.013, 0.026  | 0.64  | 0.521        | 0.910 |
| rh_G_oc.temp_med.Lingual     | 0.000  | -0.026, 0.025  | -0.02 | 0.982        | 0.993 |
| rh_G_oc.temp_med.Parahip     | -0.005 | -0.025, 0.014  | -0.55 | 0.580        | 0.910 |
| rh_G_orbital                 | 0.009  | -0.018, 0.036  | 0.67  | 0.506        | 0.910 |
| rh_G_pariet_inf.Angular      | -0.003 | -0.019, 0.014  | -0.34 | 0.736        | 0.940 |
| rh_G_pariet_inf.Supramar     | 0.007  | -0.006, 0.02   | 1.02  | 0.307        | 0.910 |
| rh_G_parietal_sup            | -0.003 | -0.018, 0.011  | -0.44 | 0.664        | 0.924 |
| rh_G_postcentral             | 0.009  | -0.007, 0.024  | 1.05  | 0.293        | 0.910 |
| rh_G_precentral              | 0.003  | -0.008, 0.014  | 0.52  | 0.602        | 0.910 |
| rh_G_precuneus               | 0.003  | -0.013, 0.019  | 0.34  | 0.737        | 0.940 |
| rh_G_rectus                  | 0.000  | -0.061, 0.062  | 0.01  | 0.993        | 0.993 |
| rh_G_subcallosal             | -0.006 | -0.033, 0.021  | -0.45 | 0.652        | 0.924 |
| rh_G_temp_sup.G_T_transv     | 0.006  | -0.01, 0.021   | 0.73  | 0.465        | 0.910 |
| rh_G_temp_sup.Lateral        | -0.001 | -0.014, 0.012  | -0.12 | 0.904        | 0.974 |
| rh_G_temp_sup.Plan_polar     | 0.001  | -0.011, 0.013  | 0.16  | 0.870        | 0.974 |
| rh_G_temp_sup.Plan_tempo     | 0.013  | -0.002, 0.029  | 1.70  | 0.090        | 0.910 |
| rh_G_temporal_inf            | 0.001  | -0.022, 0.025  | 0.11  | 0.909        | 0.974 |
| rh_G_temporal_middle         | -0.009 | -0.025, 0.008  | -1.00 | 0.316        | 0.910 |
| rh_Lat_Fis.ant.Horizontal    | 0.003  | -0.016, 0.023  | 0.34  | 0.734        | 0.940 |
| rh_Lat_Fis.ant.Vertical      | -0.027 | -0.052, -0.002 | -2.10 | <b>0.037</b> | 0.910 |
| rh_Lat_Fis.post              | 0.005  | -0.013, 0.023  | 0.53  | 0.598        | 0.910 |
| rh_Pole_occipital            | 0.003  | -0.024, 0.03   | 0.22  | 0.829        | 0.974 |
| rh_Pole_temporal             | -0.003 | -0.025, 0.02   | -0.22 | 0.825        | 0.974 |
| rh_S_calcarine               | -0.003 | -0.026, 0.02   | -0.25 | 0.803        | 0.974 |
| rh_S_central                 | 0.007  | -0.01, 0.024   | 0.77  | 0.442        | 0.910 |
| rh_S_cingul.Marginalis       | 0.004  | -0.01, 0.019   | 0.57  | 0.572        | 0.910 |
| rh_S_circular_insula_ant     | -0.012 | -0.029, 0.006  | -1.29 | 0.197        | 0.910 |
| rh_S_circular_insula_inf     | 0.008  | -0.006, 0.023  | 1.18  | 0.239        | 0.910 |
| rh_S_circular_insula_sup     | -0.006 | -0.021, 0.01   | -0.73 | 0.468        | 0.910 |
| rh_S_collat_transv_ant       | -0.027 | -0.052, -0.003 | -2.23 | <b>0.027</b> | 0.910 |
| rh_S_collat_transv_post      | 0.001  | -0.019, 0.02   | 0.06  | 0.955        | 0.993 |
| rh_S_front_inf               | -0.008 | -0.027, 0.01   | -0.86 | 0.392        | 0.910 |
| rh_S_front_middle            | -0.008 | -0.028, 0.012  | -0.79 | 0.429        | 0.910 |
| rh_S_front_sup               | -0.003 | -0.017, 0.011  | -0.38 | 0.705        | 0.935 |
| rh_S_interm_prim.Jensen      | 0.001  | -0.019, 0.021  | 0.09  | 0.927        | 0.980 |
| rh_S_intrapariet_and_P_trans | 0.008  | -0.008, 0.024  | 1.02  | 0.310        | 0.910 |
| rh_S_oc_middle_and_Lunatus   | -0.014 | -0.034, 0.007  | -1.32 | 0.187        | 0.910 |
| rh_S_oc_sup_and_transversal  | 0.008  | -0.01, 0.025   | 0.89  | 0.377        | 0.910 |
| rh_S_occipital_ant           | 0.014  | -0.004, 0.032  | 1.49  | 0.136        | 0.910 |
| rh_S_oc.temp_lat             | -0.005 | -0.021, 0.011  | -0.60 | 0.549        | 0.910 |
| rh_S_oc.temp_med_and_Lingual | 0.006  | -0.008, 0.02   | 0.85  | 0.398        | 0.910 |
| rh_S_orbital_lateral         | -0.018 | -0.042, 0.007  | -1.40 | 0.163        | 0.910 |
| rh_S_orbital_med.olfact      | -0.011 | -0.054, 0.032  | -0.52 | 0.606        | 0.910 |

**eTable 24. Differences in functional activity between the never-suicidal group and the caregiver-reported suicidality group for failed stops: Welch's t-test**

| ROIs                     | Mean   | 95%CI          | t     | p (unc)      | p FDR |
|--------------------------|--------|----------------|-------|--------------|-------|
| rh_S_orbital.H_Shaped    | -0.017 | -0.039, 0.005  | -1.50 | 0.134        | 0.910 |
| rh_S_parieto_occipital   | 0.008  | -0.009, 0.024  | 0.94  | 0.350        | 0.910 |
| rh_S_pericallosal        | 0.004  | -0.016, 0.024  | 0.40  | 0.686        | 0.931 |
| rh_S_postcentral         | 0.006  | -0.008, 0.02   | 0.82  | 0.413        | 0.910 |
| rh_S_precentral.inf.part | -0.011 | -0.029, 0.007  | -1.24 | 0.215        | 0.910 |
| rh_S_precentral.sup.part | 0.001  | -0.013, 0.014  | 0.12  | 0.903        | 0.974 |
| rh_S_suborbital          | -0.017 | -0.071, 0.037  | -0.63 | 0.529        | 0.910 |
| rh_S_subparietal         | 0.015  | -0.002, 0.033  | 1.75  | 0.081        | 0.910 |
| rh_S_temporal_inf        | -0.030 | -0.053, -0.007 | -2.51 | <b>0.012</b> | 0.910 |
| rh_S_temporal_sup        | 0.006  | -0.007, 0.02   | 0.91  | 0.363        | 0.910 |
| rh_S_temporal_transverse | 0.004  | -0.017, 0.026  | 0.41  | 0.685        | 0.931 |

**Bold** denotes group differences at p<0.05 uncorrected

**eTable 25. Differences in functional activity between the never-suicidal group and the concordantly-reported suicidality group for failed stops: Welch's t-test**

| ROIs                       | Mean   | 95%CI         | t     | p (unc) | p FDR |
|----------------------------|--------|---------------|-------|---------|-------|
| <b>Subcortical regions</b> |        |               |       |         |       |
| Left.Cerebellum.Cortex     | 0.011  | -0.028, 0.049 | 0.56  | 0.579   | 0.973 |
| Left.Thalamus.Proper       | -0.004 | -0.022, 0.014 | -0.44 | 0.660   | 0.973 |
| Left.Caudate               | 0.002  | -0.028, 0.032 | 0.12  | 0.904   | 0.973 |
| Left.Putamen               | -0.010 | -0.035, 0.014 | -0.83 | 0.408   | 0.973 |
| Left.Pallidum              | 0.014  | -0.005, 0.034 | 1.44  | 0.153   | 0.973 |
| Brain.Stem                 | -0.003 | -0.025, 0.019 | -0.24 | 0.811   | 0.973 |
| Left.Hippocampus           | 0.013  | -0.009, 0.035 | 1.20  | 0.233   | 0.973 |
| Left.Amygdala              | 0.006  | -0.02, 0.031  | 0.43  | 0.670   | 0.973 |
| Left.Accumbens.area        | 0.005  | -0.026, 0.036 | 0.31  | 0.757   | 0.973 |
| Left.VentralDC             | 0.004  | -0.019, 0.027 | 0.35  | 0.724   | 0.973 |
| Right.Cerebellum.Cortex    | 0.029  | -0.013, 0.07  | 1.37  | 0.175   | 0.973 |
| Right.Thalamus.Proper      | -0.004 | -0.026, 0.017 | -0.37 | 0.711   | 0.973 |
| Right.Caudate              | -0.011 | -0.041, 0.019 | -0.71 | 0.480   | 0.973 |
| Right.Putamen              | -0.008 | -0.034, 0.018 | -0.60 | 0.552   | 0.973 |
| Right.Pallidum             | -0.018 | -0.038, 0.003 | -1.71 | 0.091   | 0.973 |
| Right.Hippocampus          | 0.008  | -0.014, 0.031 | 0.72  | 0.475   | 0.973 |
| Right.Amygdala             | 0.019  | -0.01, 0.048  | 1.32  | 0.190   | 0.973 |
| Right.Accumbens.area       | -0.012 | -0.045, 0.021 | -0.70 | 0.487   | 0.973 |
| Right.VentralDC            | -0.003 | -0.028, 0.022 | -0.21 | 0.835   | 0.973 |
| <b>Cortical regions</b>    |        |               |       |         |       |
| lh_G_and_S_frontomargin    | 0.010  | -0.042, 0.062 | 0.40  | 0.692   | 0.973 |
| lh_G_and_S_occipital_inf   | 0.004  | -0.036, 0.045 | 0.22  | 0.827   | 0.973 |
| lh_G_and_S_paracentral     | -0.011 | -0.041, 0.02  | -0.69 | 0.490   | 0.973 |

**eTable 25. Differences in functional activity between the never-suicidal group and the concordantly-reported suicidality group for failed stops: Welch's t-test**

| <b>ROIs</b>                 | <b>Mean</b> | <b>95%CI</b>  | <b>t</b> | <b>p (unc)</b> | <b>p FDR</b> |
|-----------------------------|-------------|---------------|----------|----------------|--------------|
| lh_G_and_S_subcentral       | -0.017      | -0.047, 0.013 | -1.13    | 0.262          | 0.973        |
| lh_G_and_S_transv_frontopol | 0.013       | -0.04, 0.066  | 0.48     | 0.631          | 0.973        |
| lh_G_and_S_cingul.Ant       | -0.001      | -0.029, 0.026 | -0.09    | 0.927          | 0.973        |
| lh_G_and_S_cingul.Mid.Ant   | -0.020      | -0.047, 0.006 | -1.52    | 0.132          | 0.973        |
| lh_G_and_S_cingul.Mid.Post  | -0.005      | -0.031, 0.021 | -0.39    | 0.695          | 0.973        |
| lh_G_cingul.Post.dorsal     | 0.022       | -0.004, 0.048 | 1.69     | 0.094          | 0.973        |
| lh_G_cingul.Post.ventral    | 0.022       | -0.035, 0.079 | 0.77     | 0.442          | 0.973        |
| lh_G_cuneus                 | -0.029      | -0.07, 0.012  | -1.41    | 0.163          | 0.973        |
| lh_G_front_inf.Opercular    | -0.003      | -0.027, 0.022 | -0.21    | 0.833          | 0.973        |
| lh_G_front_inf.Orbital      | 0.002       | -0.042, 0.046 | 0.09     | 0.931          | 0.973        |
| lh_G_front_inf.Triangul     | 0.012       | -0.024, 0.049 | 0.66     | 0.509          | 0.973        |
| lh_G_front_middle           | 0.005       | -0.02, 0.03   | 0.43     | 0.671          | 0.973        |
| lh_G_front_sup              | 0.001       | -0.02, 0.021  | 0.07     | 0.944          | 0.973        |
| lh_G_Ins_lg_and_S_cent_ins  | 0.006       | -0.021, 0.034 | 0.45     | 0.656          | 0.973        |
| lh_G_insular_short          | -0.004      | -0.027, 0.019 | -0.32    | 0.746          | 0.973        |
| lh_G_occipital_middle       | 0.000       | -0.026, 0.026 | -0.01    | 0.993          | 0.993        |
| lh_G_occipital_sup          | -0.014      | -0.049, 0.021 | -0.80    | 0.426          | 0.973        |
| lh_G_oc.temp_lat.fusifor    | 0.002       | -0.033, 0.037 | 0.13     | 0.899          | 0.973        |
| lh_G_oc.temp_med.Lingual    | 0.015       | -0.029, 0.058 | 0.67     | 0.502          | 0.973        |
| lh_G_oc.temp_med.Parahip    | -0.007      | -0.035, 0.02  | -0.53    | 0.599          | 0.973        |
| lh_G_orbital                | -0.009      | -0.063, 0.046 | -0.31    | 0.754          | 0.973        |
| lh_G_pariet_inf.Angular     | 0.005       | -0.023, 0.033 | 0.34     | 0.734          | 0.973        |
| lh_G_pariet_inf.Supramar    | 0.009       | -0.014, 0.032 | 0.80     | 0.423          | 0.973        |
| lh_G_parietal_sup           | 0.004       | -0.022, 0.029 | 0.28     | 0.778          | 0.973        |
| lh_G_postcentral            | 0.003       | -0.025, 0.032 | 0.24     | 0.812          | 0.973        |
| lh_G_precentral             | -0.005      | -0.026, 0.015 | -0.53    | 0.595          | 0.973        |
| lh_G_precuneus              | 0.016       | -0.009, 0.042 | 1.28     | 0.204          | 0.973        |
| lh_G_rectus                 | 0.005       | -0.087, 0.096 | 0.10     | 0.922          | 0.973        |
| lh_G_subcallosal            | 0.011       | -0.037, 0.06  | 0.47     | 0.638          | 0.973        |
| lh_G_temp_sup.G_T_transv    | -0.002      | -0.028, 0.024 | -0.14    | 0.890          | 0.973        |
| lh_G_temp_sup.Lateral       | 0.002       | -0.018, 0.023 | 0.23     | 0.815          | 0.973        |
| lh_G_temp_sup.Plan_polar    | -0.001      | -0.022, 0.02  | -0.11    | 0.912          | 0.973        |
| lh_G_temp_sup.Plan_tempo    | 0.023       | -0.001, 0.047 | 1.90     | 0.061          | 0.973        |
| lh_G_temporal_inf           | 0.008       | -0.036, 0.051 | 0.35     | 0.730          | 0.973        |
| lh_G_temporal_middle        | 0.002       | -0.026, 0.03  | 0.16     | 0.872          | 0.973        |
| lh_Lat_Fis.ant.Horizontal   | 0.000       | -0.034, 0.033 | -0.02    | 0.983          | 0.989        |
| lh_Lat_Fis.ant.Vertical     | 0.024       | -0.022, 0.069 | 1.04     | 0.303          | 0.973        |
| lh_Lat_Fis.post             | -0.019      | -0.047, 0.008 | -1.39    | 0.166          | 0.973        |
| lh_Pole_occipital           | 0.014       | -0.036, 0.063 | 0.55     | 0.586          | 0.973        |
| lh_Pole_temporal            | 0.009       | -0.026, 0.044 | 0.50     | 0.618          | 0.973        |
| lh_S_calcarine              | -0.029      | -0.07, 0.012  | -1.39    | 0.169          | 0.973        |
| lh_S_central                | -0.011      | -0.042, 0.02  | -0.70    | 0.484          | 0.973        |
| lh_S_cingul.Marginalis      | 0.012       | -0.012, 0.037 | 1.02     | 0.309          | 0.973        |



**eTable 25. Differences in functional activity between the never-suicidal group and the concordantly-reported suicidality group for failed stops: Welch's t-test**

| ROIs                         | Mean   | 95%CI         | t     | p (unc) | p FDR |
|------------------------------|--------|---------------|-------|---------|-------|
| lh_S_circular_insula_ant     | -0.009 | -0.039, 0.021 | -0.60 | 0.552   | 0.973 |
| lh_S_circular_insula_inf     | -0.010 | -0.032, 0.012 | -0.91 | 0.367   | 0.973 |
| lh_S_circular_insula_sup     | 0.001  | -0.029, 0.031 | 0.08  | 0.936   | 0.973 |
| lh_S_collat_transv_ant       | 0.021  | -0.021, 0.062 | 1.00  | 0.321   | 0.973 |
| lh_S_collat_transv_post      | 0.005  | -0.029, 0.039 | 0.30  | 0.762   | 0.973 |
| lh_S_front_inf               | 0.018  | -0.015, 0.05  | 1.08  | 0.283   | 0.973 |
| lh_S_front_middle            | 0.017  | -0.014, 0.049 | 1.09  | 0.279   | 0.973 |
| lh_S_front_sup               | -0.002 | -0.025, 0.021 | -0.17 | 0.865   | 0.973 |
| lh_S_interm_prim.Jensen      | 0.016  | -0.019, 0.05  | 0.90  | 0.370   | 0.973 |
| lh_S_intrapariet_and_P_trans | 0.009  | -0.02, 0.039  | 0.63  | 0.530   | 0.973 |
| lh_S_oc_middle_and_Lunatus   | -0.031 | -0.063, 0     | -1.96 | 0.053   | 0.973 |
| lh_S_oc_sup_and_transversal  | -0.016 | -0.045, 0.014 | -1.03 | 0.305   | 0.973 |
| lh_S_occipital_ant           | 0.001  | -0.027, 0.029 | 0.08  | 0.933   | 0.973 |
| lh_S_oc.temp_lat             | 0.005  | -0.023, 0.033 | 0.38  | 0.707   | 0.973 |
| lh_S_oc.temp_med_and_Lingual | -0.003 | -0.027, 0.021 | -0.21 | 0.830   | 0.973 |
| lh_S_orbital_lateral         | 0.010  | -0.032, 0.051 | 0.45  | 0.652   | 0.973 |
| lh_S_orbital_med.olfact      | -0.003 | -0.074, 0.067 | -0.10 | 0.923   | 0.973 |
| lh_S_orbital.H_Shaped        | 0.034  | -0.002, 0.069 | 1.90  | 0.061   | 0.973 |
| lh_S_parieto_occipital       | 0.011  | -0.018, 0.04  | 0.77  | 0.441   | 0.973 |
| lh_S_pericallosal            | -0.007 | -0.04, 0.026  | -0.43 | 0.671   | 0.973 |
| lh_S_postcentral             | -0.003 | -0.027, 0.021 | -0.23 | 0.822   | 0.973 |
| lh_S_precentral.inf.part     | 0.005  | -0.025, 0.036 | 0.35  | 0.727   | 0.973 |
| lh_S_precentral.sup.part     | 0.005  | -0.018, 0.028 | 0.40  | 0.687   | 0.973 |
| lh_S_suborbital              | -0.001 | -0.07, 0.068  | -0.03 | 0.974   | 0.985 |
| lh_S_subparietal             | -0.005 | -0.039, 0.028 | -0.31 | 0.758   | 0.973 |
| lh_S_temporal_inf            | -0.012 | -0.051, 0.026 | -0.62 | 0.534   | 0.973 |
| lh_S_temporal_sup            | -0.003 | -0.026, 0.021 | -0.24 | 0.808   | 0.973 |
| lh_S_temporal_transverse     | 0.006  | -0.029, 0.042 | 0.36  | 0.721   | 0.973 |
| rh_G_and_S_frontomargin      | 0.003  | -0.046, 0.052 | 0.12  | 0.907   | 0.973 |
| rh_G_and_S_occipital_inf     | -0.003 | -0.043, 0.038 | -0.14 | 0.892   | 0.973 |
| rh_G_and_S_paracentral       | -0.006 | -0.038, 0.026 | -0.35 | 0.727   | 0.973 |
| rh_G_and_S_subcentral        | 0.007  | -0.026, 0.039 | 0.41  | 0.681   | 0.973 |
| rh_G_and_S_transv_frontopol  | -0.036 | -0.082, 0.01  | -1.56 | 0.123   | 0.973 |
| rh_G_and_S_cingul.Ant        | 0.001  | -0.027, 0.03  | 0.09  | 0.929   | 0.973 |
| rh_G_and_S_cingul.Mid.Ant    | -0.013 | -0.038, 0.012 | -1.03 | 0.304   | 0.973 |
| rh_G_and_S_cingul.Mid.Post   | 0.002  | -0.016, 0.02  | 0.23  | 0.816   | 0.973 |
| rh_G_cingul.Post.dorsal      | -0.003 | -0.029, 0.023 | -0.24 | 0.812   | 0.973 |
| rh_G_cingul.Post.ventral     | -0.003 | -0.048, 0.042 | -0.14 | 0.887   | 0.973 |
| rh_G_cuneus                  | -0.018 | -0.057, 0.021 | -0.89 | 0.373   | 0.973 |
| rh_G_front_inf.Opercular     | -0.015 | -0.041, 0.012 | -1.10 | 0.275   | 0.973 |
| rh_G_front_inf.Orbital       | -0.035 | -0.073, 0.004 | -1.79 | 0.077   | 0.973 |
| rh_G_front_inf.Triangul      | 0.010  | -0.025, 0.045 | 0.57  | 0.572   | 0.973 |
| rh_G_front_middle            | -0.011 | -0.041, 0.018 | -0.76 | 0.450   | 0.973 |

**eTable 25. Differences in functional activity between the never-suicidal group and the concordantly-reported suicidality group for failed stops: Welch's t-test**

| <b>ROIs</b>                  | <b>Mean</b> | <b>95%CI</b>  | <b>t</b> | <b>p (unc)</b> | <b>p FDR</b> |
|------------------------------|-------------|---------------|----------|----------------|--------------|
| rh_G_front_sup               | -0.006      | -0.025, 0.014 | -0.57    | 0.570          | 0.973        |
| rh_G_Ins_lg_and_S_cent_ins   | -0.003      | -0.031, 0.025 | -0.23    | 0.817          | 0.973        |
| rh_G_insular_short           | -0.003      | -0.027, 0.021 | -0.25    | 0.806          | 0.973        |
| rh_G_occipital_middle        | 0.014       | -0.015, 0.043 | 0.99     | 0.325          | 0.973        |
| rh_G_occipital_sup           | -0.005      | -0.035, 0.025 | -0.31    | 0.754          | 0.973        |
| rh_G_oc.temp_lat.fusifor     | 0.011       | -0.023, 0.044 | 0.63     | 0.532          | 0.973        |
| rh_G_oc.temp_med.Lingual     | -0.017      | -0.061, 0.027 | -0.78    | 0.440          | 0.973        |
| rh_G_oc.temp_med.Parahip     | -0.018      | -0.05, 0.014  | -1.14    | 0.257          | 0.973        |
| rh_G_orbital                 | 0.003       | -0.046, 0.052 | 0.12     | 0.905          | 0.973        |
| rh_G_pariet_inf.Angular      | -0.003      | -0.031, 0.026 | -0.21    | 0.838          | 0.973        |
| rh_G_pariet_inf.Supramar     | 0.007       | -0.019, 0.032 | 0.51     | 0.615          | 0.973        |
| rh_G_parietal_sup            | -0.002      | -0.029, 0.026 | -0.13    | 0.898          | 0.973        |
| rh_G_postcentral             | 0.013       | -0.017, 0.043 | 0.87     | 0.386          | 0.973        |
| rh_G_precentral              | 0.006       | -0.015, 0.028 | 0.59     | 0.560          | 0.973        |
| rh_G_precuneus               | 0.013       | -0.015, 0.042 | 0.94     | 0.349          | 0.973        |
| rh_G_rectus                  | -0.050      | -0.164, 0.064 | -0.87    | 0.384          | 0.973        |
| rh_G_subcallosal             | -0.001      | -0.053, 0.052 | -0.03    | 0.973          | 0.985        |
| rh_G_temp_sup.G_T_transv     | -0.002      | -0.03, 0.025  | -0.17    | 0.863          | 0.973        |
| rh_G_temp_sup.Lateral        | -0.002      | -0.024, 0.021 | -0.15    | 0.880          | 0.973        |
| rh_G_temp_sup.Plan_polar     | 0.014       | -0.007, 0.035 | 1.31     | 0.192          | 0.973        |
| rh_G_temp_sup.Plan_tempo     | 0.003       | -0.024, 0.03  | 0.22     | 0.824          | 0.973        |
| rh_G_temporal_inf            | -0.002      | -0.041, 0.037 | -0.10    | 0.917          | 0.973        |
| rh_G_temporal_middle         | -0.013      | -0.04, 0.014  | -0.94    | 0.352          | 0.973        |
| rh_Lat_Fis.ant.Horizontal    | 0.013       | -0.024, 0.049 | 0.68     | 0.498          | 0.973        |
| rh_Lat_Fis.ant.Vertical      | -0.029      | -0.069, 0.012 | -1.40    | 0.165          | 0.973        |
| rh_Lat_Fis.post              | -0.003      | -0.037, 0.031 | -0.18    | 0.856          | 0.973        |
| rh_Pole_occipital            | 0.023       | -0.028, 0.074 | 0.91     | 0.367          | 0.973        |
| rh_Pole_temporal             | 0.025       | -0.014, 0.064 | 1.29     | 0.201          | 0.973        |
| rh_S_calcarine               | -0.011      | -0.052, 0.03  | -0.53    | 0.596          | 0.973        |
| rh_S_central                 | -0.005      | -0.036, 0.026 | -0.33    | 0.739          | 0.973        |
| rh_S_cingul.Marginalis       | 0.005       | -0.019, 0.03  | 0.44     | 0.663          | 0.973        |
| rh_S_circular_insula_ant     | -0.021      | -0.052, 0.009 | -1.38    | 0.172          | 0.973        |
| rh_S_circular_insula_inf     | 0.004       | -0.02, 0.027  | 0.31     | 0.756          | 0.973        |
| rh_S_circular_insula_sup     | -0.011      | -0.04, 0.019  | -0.73    | 0.464          | 0.973        |
| rh_S_collat_transv_ant       | -0.019      | -0.058, 0.02  | -0.96    | 0.338          | 0.973        |
| rh_S_collat_transv_post      | -0.017      | -0.046, 0.013 | -1.13    | 0.261          | 0.973        |
| rh_S_front_inf               | -0.005      | -0.038, 0.028 | -0.29    | 0.771          | 0.973        |
| rh_S_front_middle            | -0.001      | -0.037, 0.034 | -0.07    | 0.941          | 0.973        |
| rh_S_front_sup               | 0.005       | -0.019, 0.028 | 0.39     | 0.698          | 0.973        |
| rh_S_interprim.Jensen        | -0.008      | -0.042, 0.026 | -0.49    | 0.628          | 0.973        |
| rh_S_intrapariet_and_P_trans | 0.012       | -0.018, 0.041 | 0.79     | 0.433          | 0.973        |
| rh_S_oc_middle_and_Lunatus   | -0.021      | -0.058, 0.017 | -1.09    | 0.276          | 0.973        |
| rh_S_oc_sup_and_transversal  | 0.001       | -0.031, 0.032 | 0.05     | 0.961          | 0.984        |

**eTable 25. Differences in functional activity between the never-suicidal group and the concordantly-reported suicidality group for failed stops: Welch's t-test**

| <b>ROIs</b>                  | <b>Mean</b> | <b>95%CI</b>  | <b>t</b> | <b>p (unc)</b> | <b>p FDR</b> |
|------------------------------|-------------|---------------|----------|----------------|--------------|
| rh_S_occipital_ant           | 0.010       | -0.021, 0.04  | 0.62     | 0.540          | 0.973        |
| rh_S_oc.temp_lat             | -0.006      | -0.033, 0.02  | -0.46    | 0.645          | 0.973        |
| rh_S_oc.temp_med_and_Lingual | -0.004      | -0.026, 0.018 | -0.35    | 0.729          | 0.973        |
| rh_S_orbital_lateral         | -0.030      | -0.076, 0.016 | -1.30    | 0.198          | 0.973        |
| rh_S_orbital_med.olfact      | -0.003      | -0.076, 0.07  | -0.08    | 0.938          | 0.973        |
| rh_S_orbital.H_Shaped        | -0.010      | -0.046, 0.027 | -0.52    | 0.607          | 0.973        |
| rh_S_parieto_occipital       | -0.005      | -0.032, 0.021 | -0.40    | 0.687          | 0.973        |
| rh_S_pericallosal            | 0.004       | -0.032, 0.041 | 0.24     | 0.813          | 0.973        |
| rh_S_postcentral             | 0.008       | -0.016, 0.033 | 0.69     | 0.492          | 0.973        |
| rh_S_precentral.inf.part     | -0.014      | -0.045, 0.018 | -0.87    | 0.385          | 0.973        |
| rh_S_precentral.sup.part     | 0.008       | -0.017, 0.033 | 0.63     | 0.532          | 0.973        |
| rh_S_suborbital              | -0.032      | -0.134, 0.07  | -0.62    | 0.534          | 0.973        |
| rh_S_subparietal             | 0.025       | -0.007, 0.058 | 1.56     | 0.123          | 0.973        |
| rh_S_temporal_inf            | -0.041      | -0.086, 0.004 | -1.82    | 0.072          | 0.973        |
| rh_S_temporal_sup            | 0.006       | -0.016, 0.028 | 0.53     | 0.598          | 0.973        |
| rh_S_temporal_transverse     | -0.013      | -0.048, 0.022 | -0.72    | 0.471          | 0.973        |

**Bold** denotes group differences at  $p < 0.05$  uncorrected

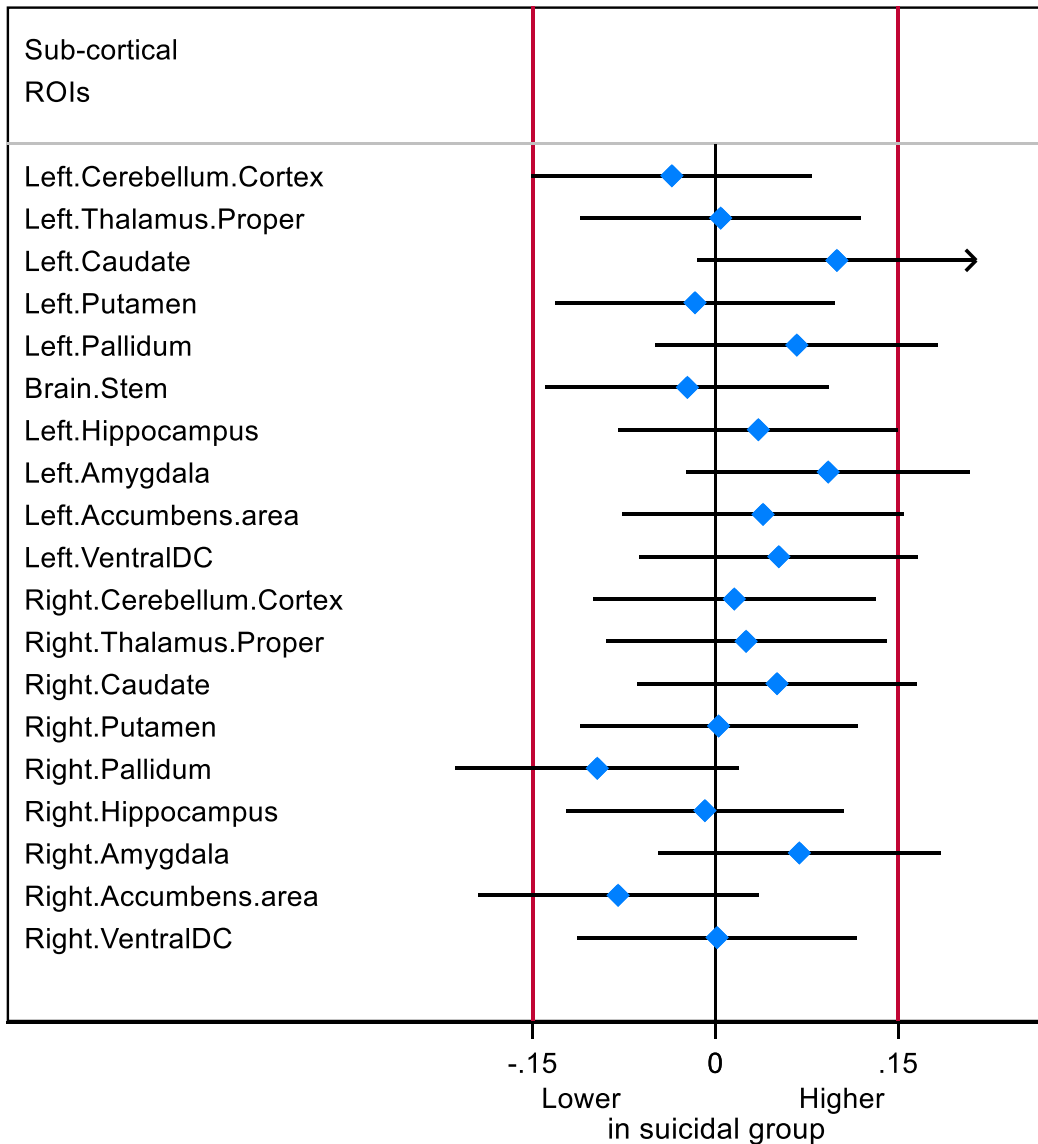

**eFigure 36.** Results of the Equivalence test for differences in functional activity in subcortical regions between the never-suicidal group and the child-reported suicidality group for failed stops. The figure shows the effect sizes and 95% confidence intervals of the difference against the interval of equivalence (-0.15 to 0.15).

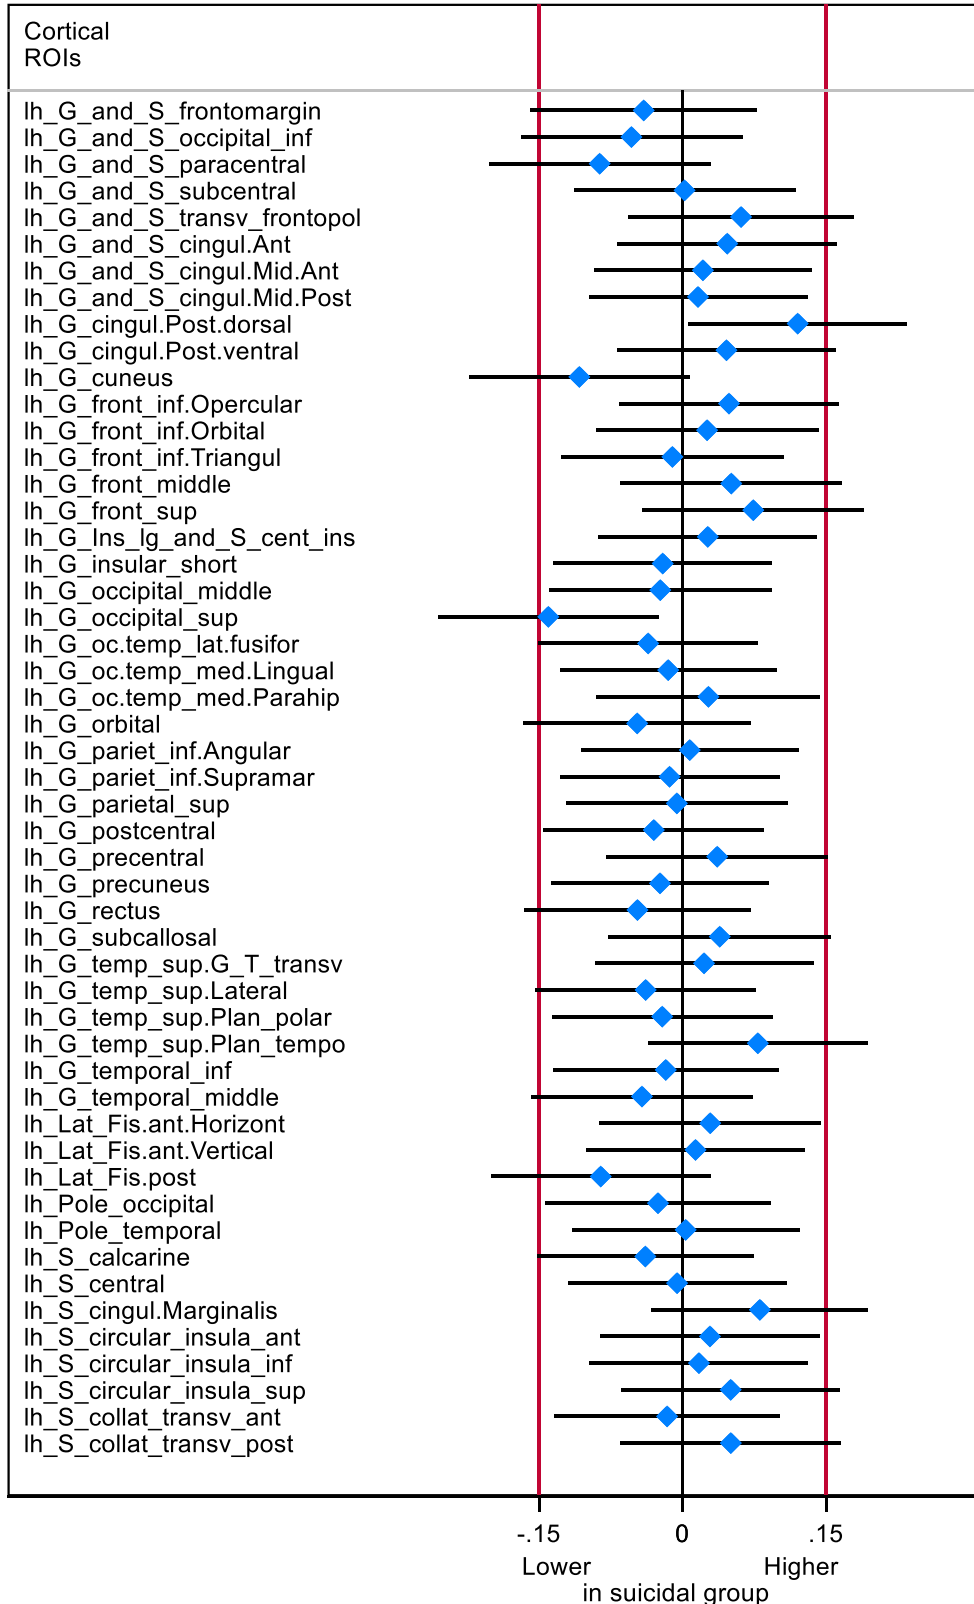

**eFigure 37 (1 of 3).** Results of the Equivalence test for differences in functional activity in cortical regions between the never-suicidal group and the child-reported suicidality group for failed stops. The figure shows the effect sizes and 95% confidence intervals of the difference against the interval of equivalence (-0.15 to 0.15).

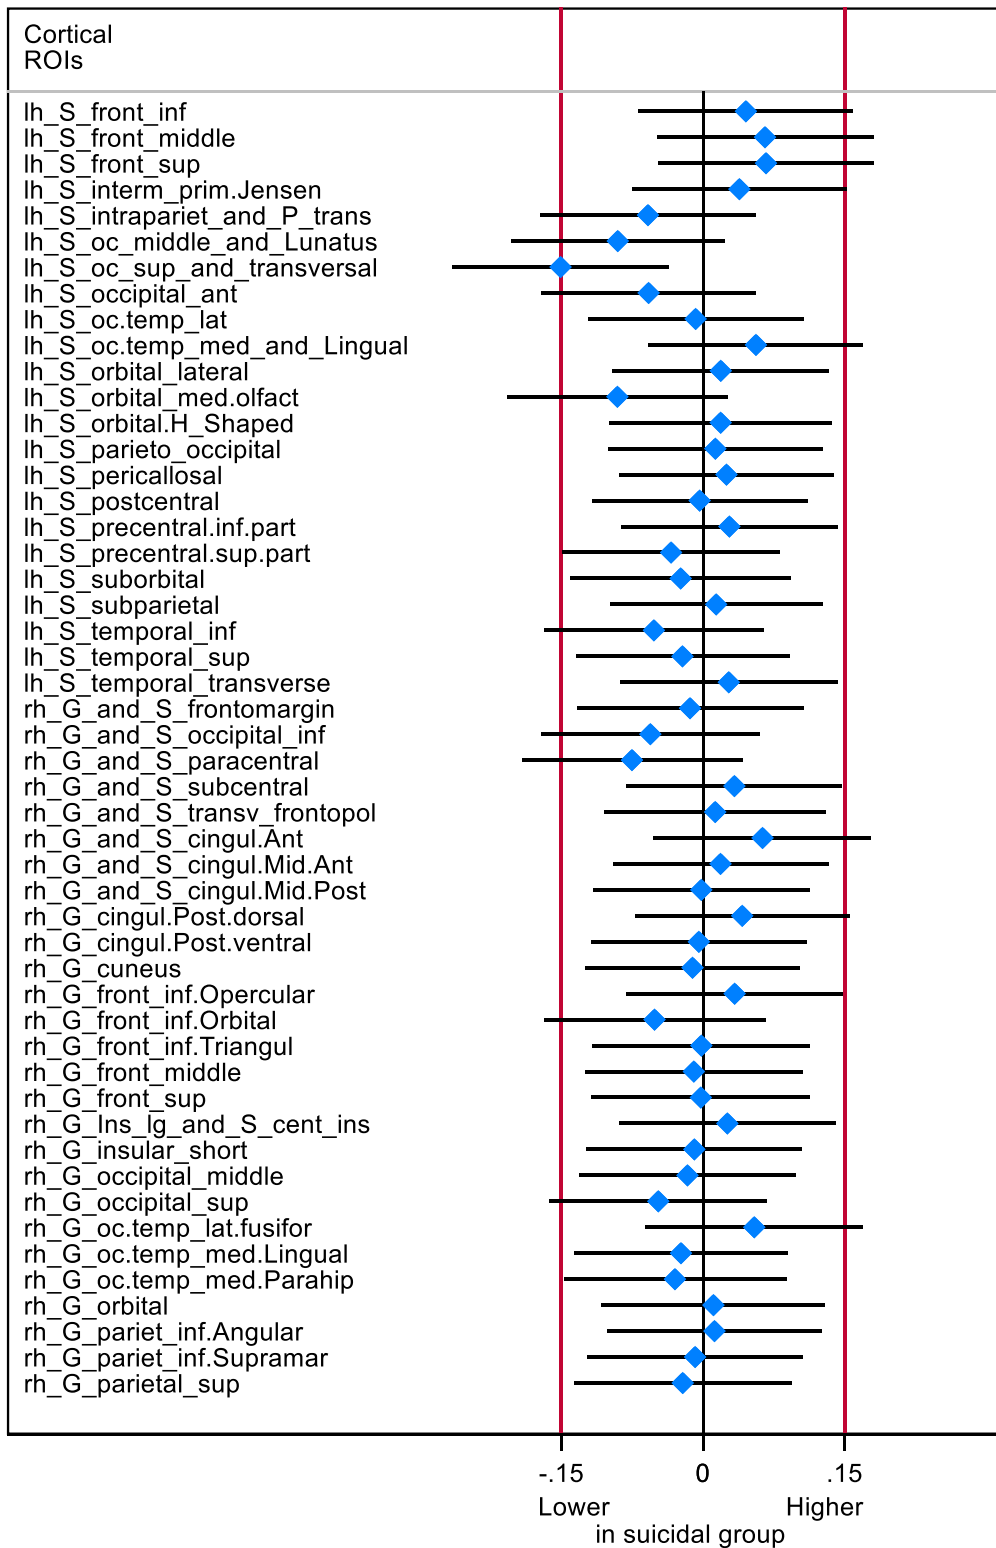

**eFigure 37 (2 of 3).** Results of the Equivalence test for differences in functional activity in cortical regions between the never-suicidal group and the child-reported suicidality group for failed stops. The figure shows the effect sizes and 95% confidence intervals of the difference against the interval of equivalence (-0.15 to 0.15).

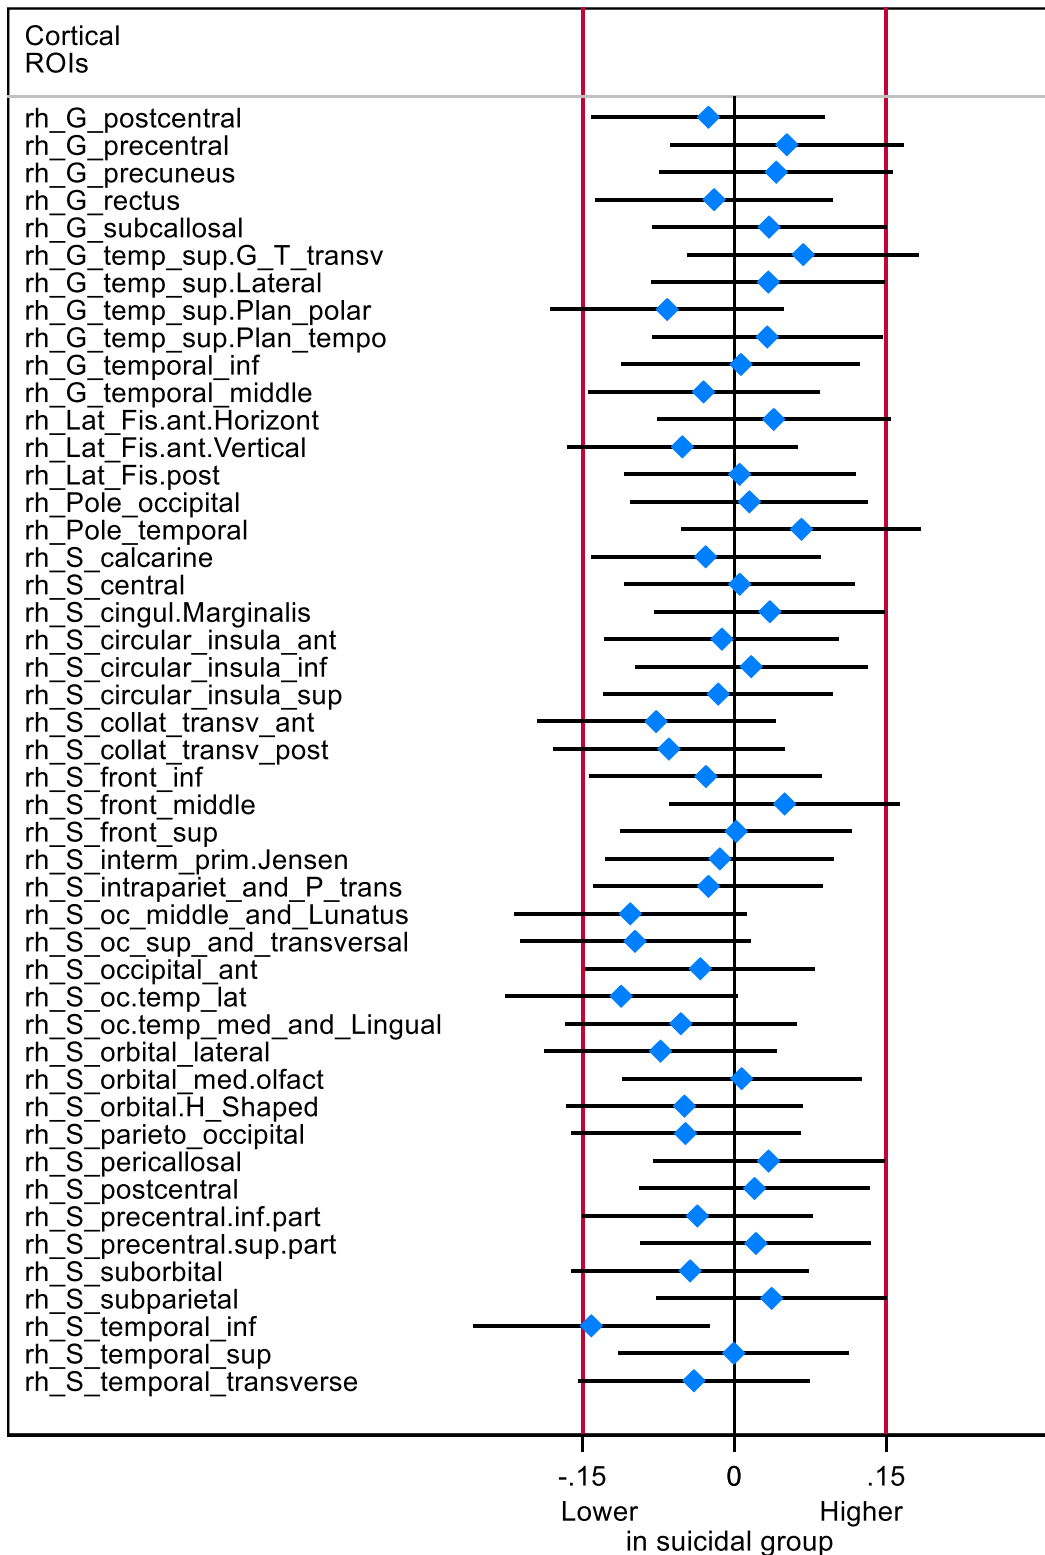

**eFigure 37 (3 of 3).** Results of the Equivalence test for differences in functional activity in cortical regions between the never-suicidal group and the child-reported suicidality group for failed stops. The figure shows the effect sizes and 95% confidence intervals of the difference against the interval of equivalence (-0.15 to 0.15).

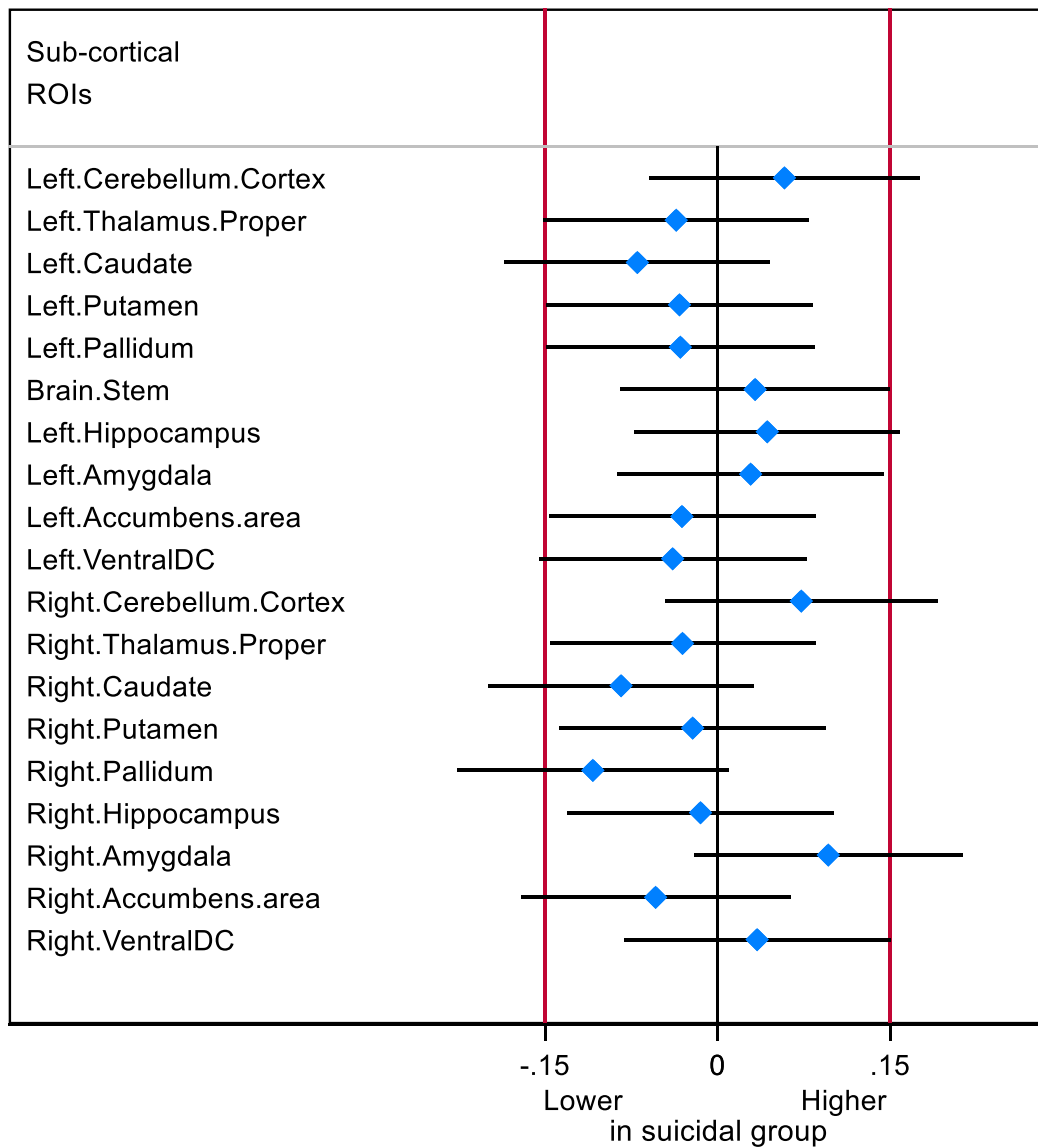

**eFigure 38.** Results of the Equivalence test for differences in functional activity in subcortical regions between the never-suicidal group and the caregiver-reported suicidality group for failed stops. The figure shows the effect sizes and 95% confidence intervals of the difference against the interval of equivalence (-0.15 to 0.15).



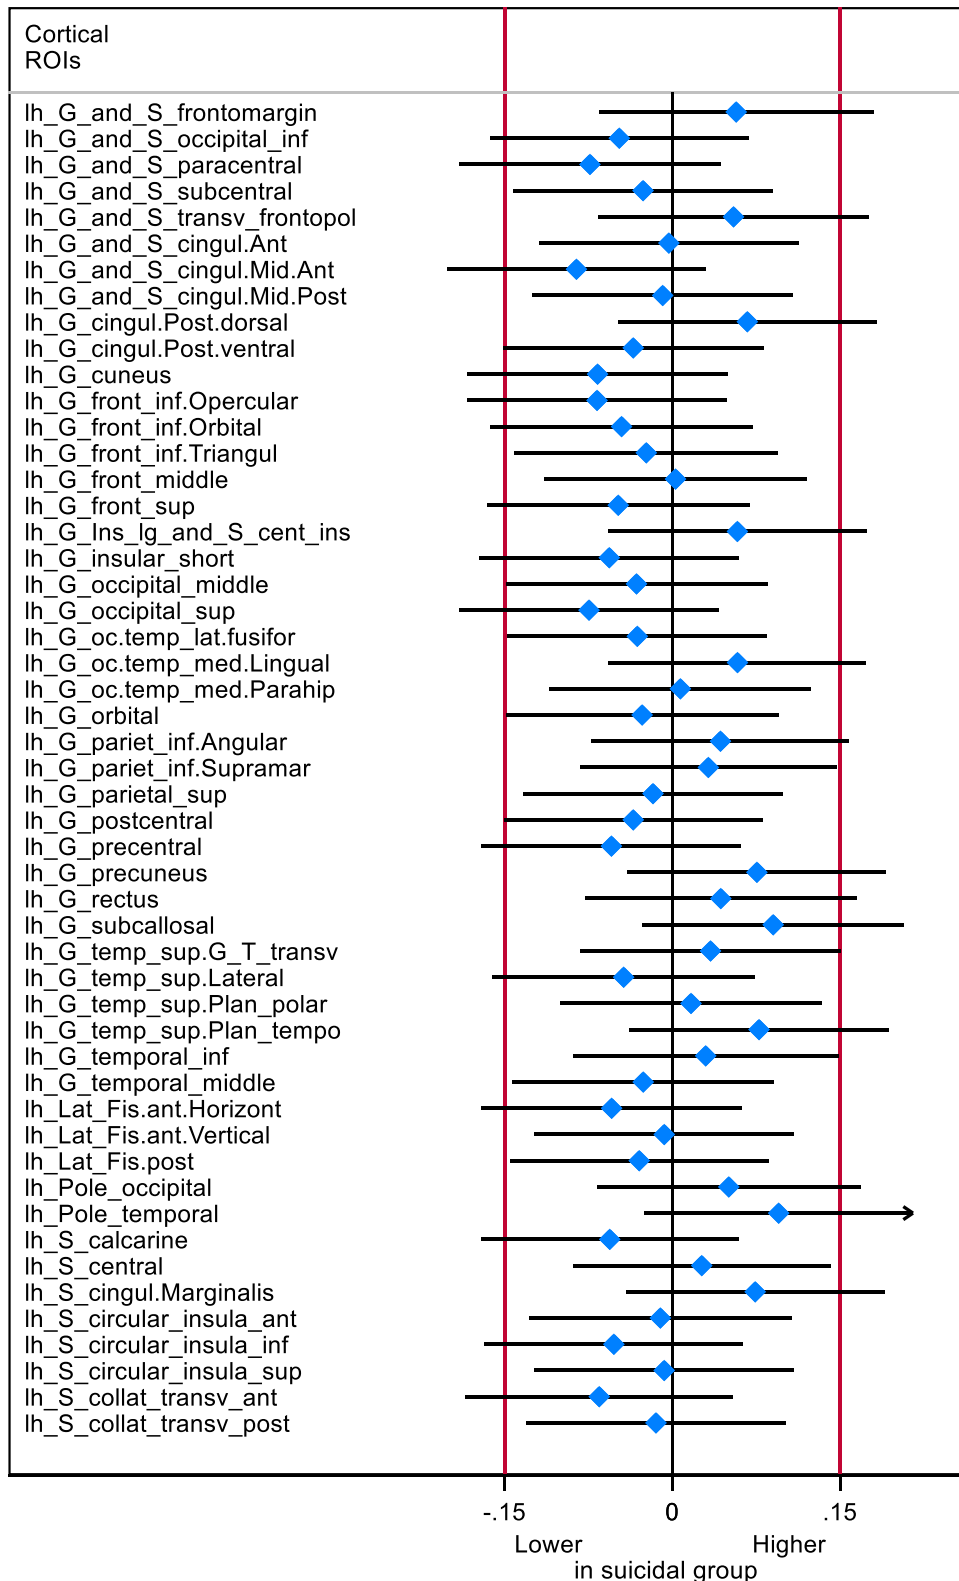

**eFigure 39 (1 of 3).** Results of the Equivalence test for differences in functional activity in cortical regions between the never-suicidal group and the caregiver-reported suicidality group for failed stops. The figure shows the effect sizes and 95% confidence intervals of the difference against the interval of equivalence (-0.15 to 0.15).

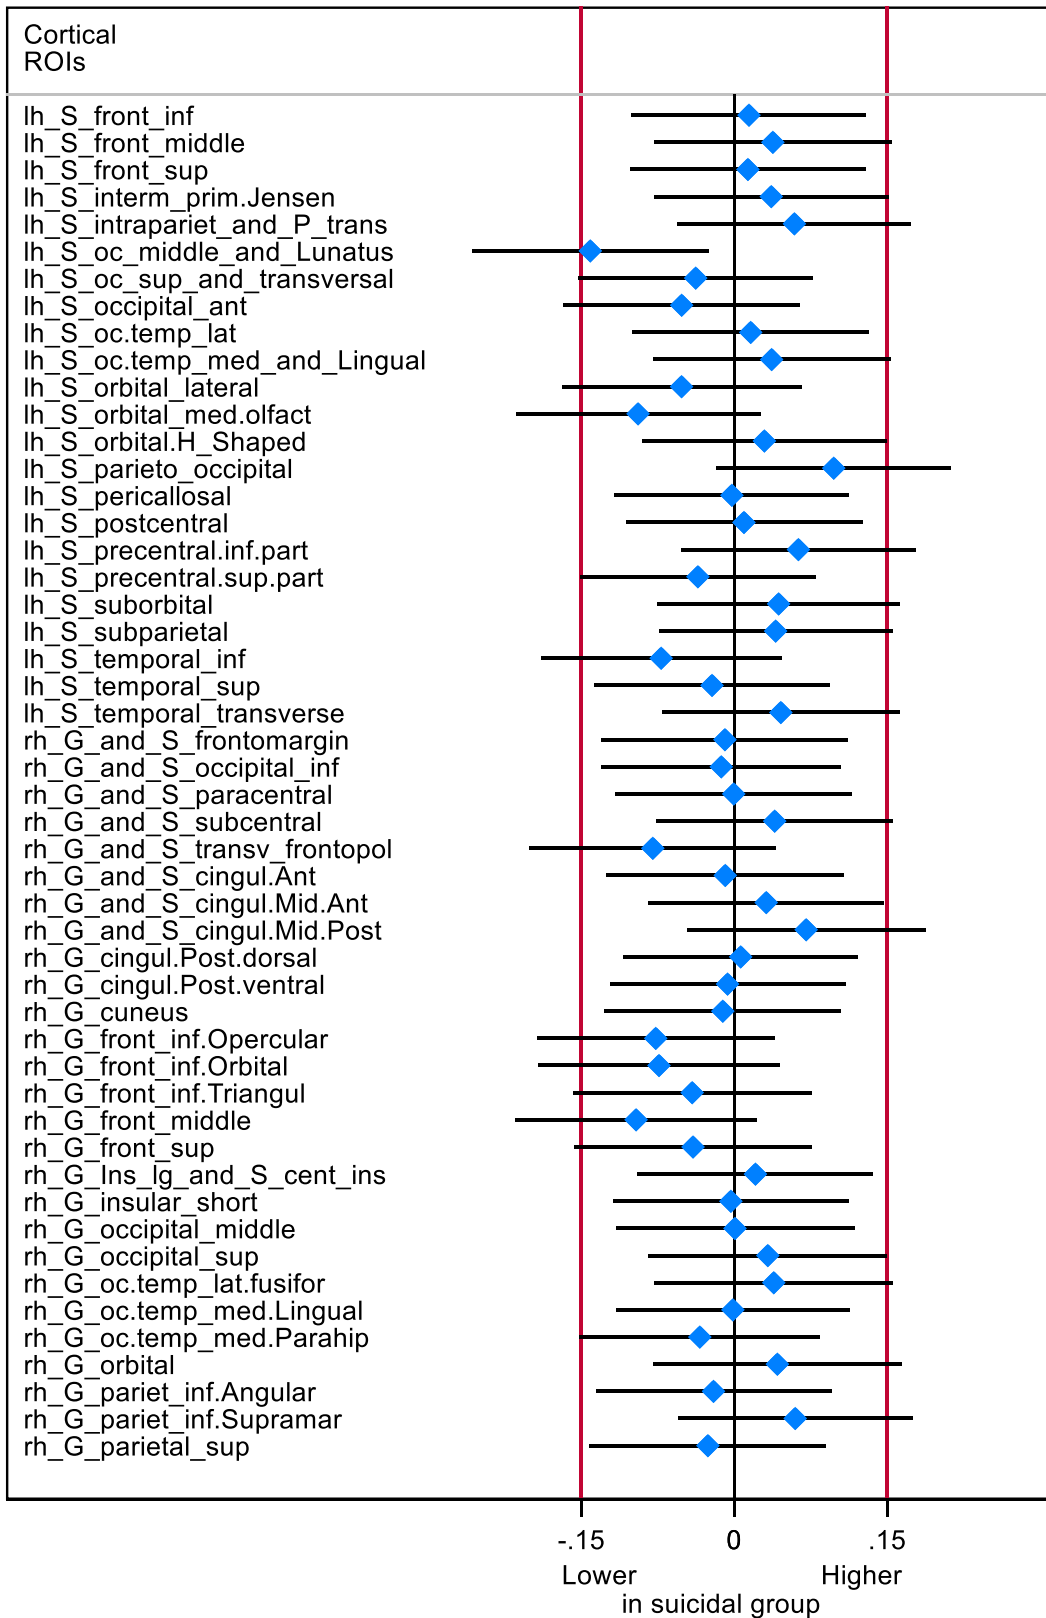

**eFigure 39 (2 of 3).** Results of the Equivalence test for differences in functional activity in cortical regions between the never-suicidal group and the caregiver-reported suicidality group for failed stops. The figure shows the effect sizes and 95% confidence intervals of the difference against the interval of equivalence (-0.15 to 0.15).

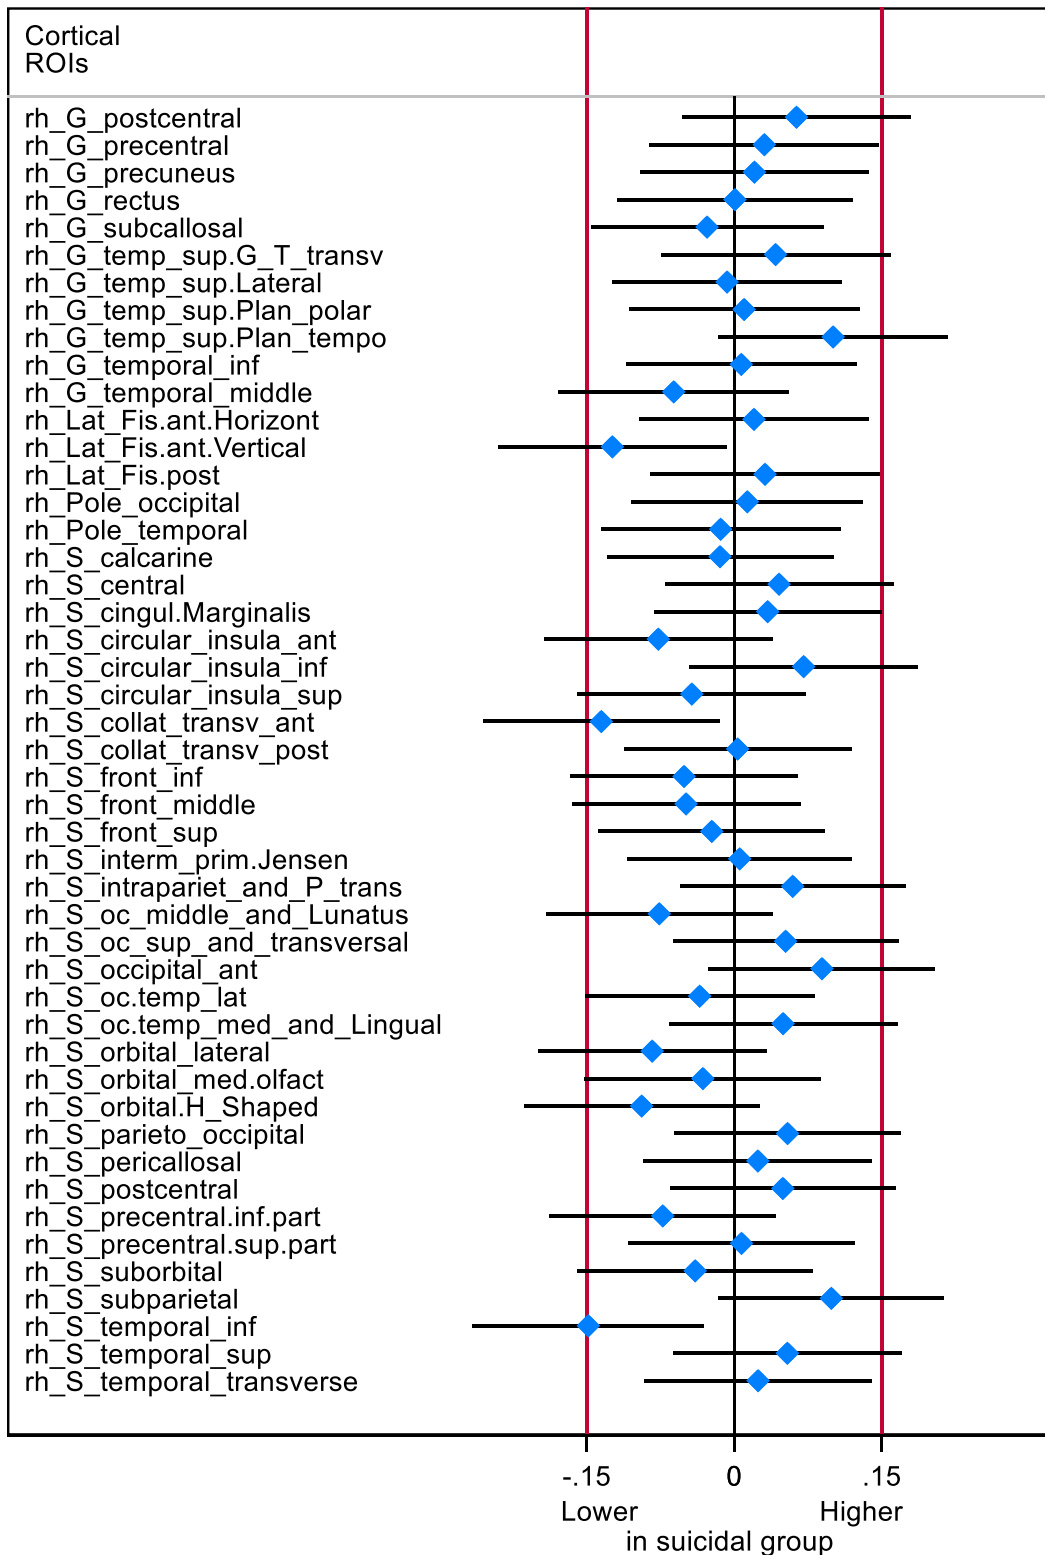

**eFigure 39 (3 of 3).** Results of the Equivalence test for differences in functional activity in cortical regions between the never-suicidal group and the caregiver-reported suicidality group for failed stops. The figure shows the effect sizes and 95% confidence intervals of the difference against the interval of equivalence (-0.15 to 0.15).

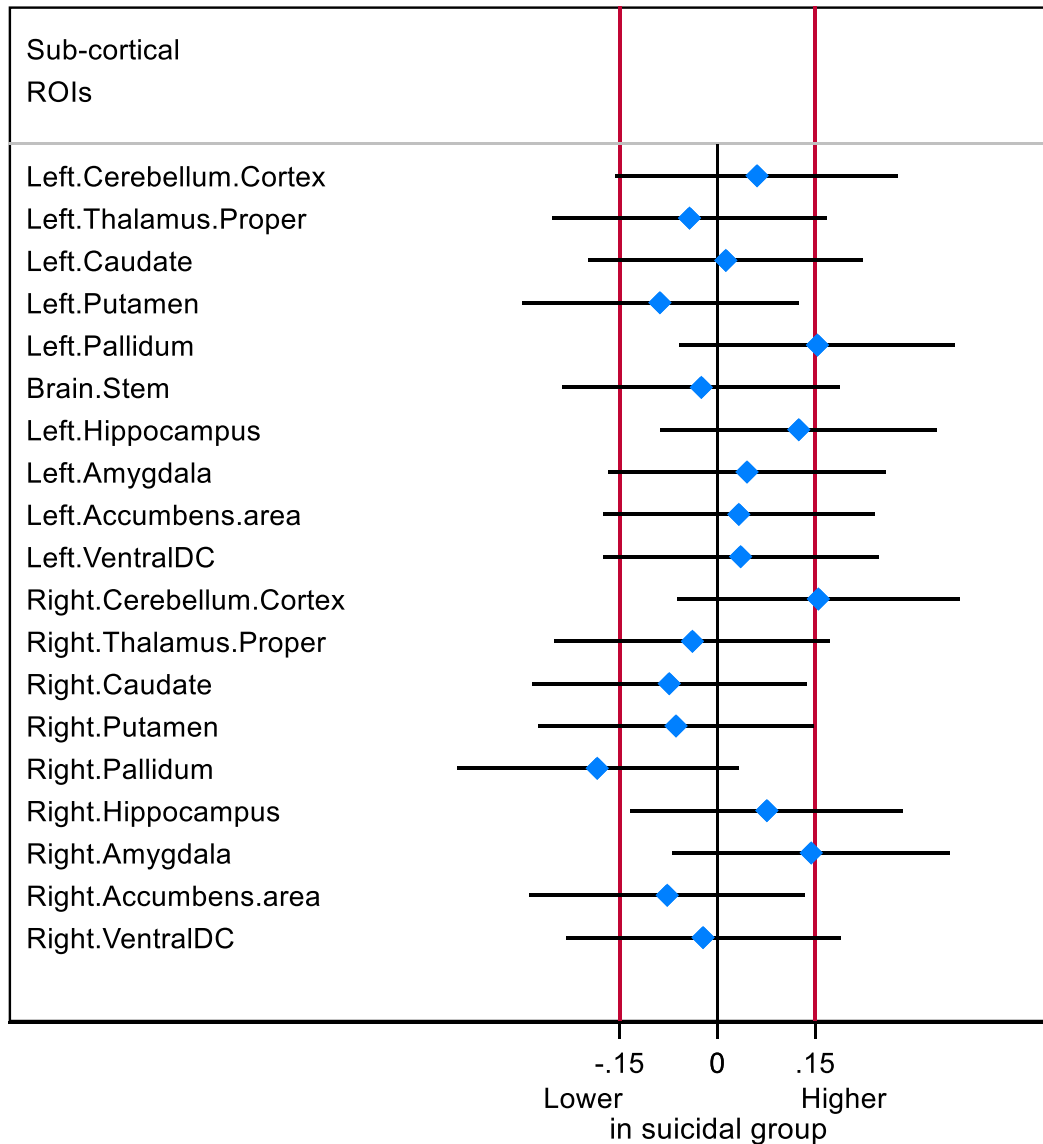

**eFigure 40.** Results of the Equivalence test for differences in functional activity in subcortical regions between the never-suicidal group and the concordantly-reported suicidality group for failed stops. The figure shows the effect sizes and 95% confidence intervals of the difference against the interval of equivalence (-0.15 to 0.15).

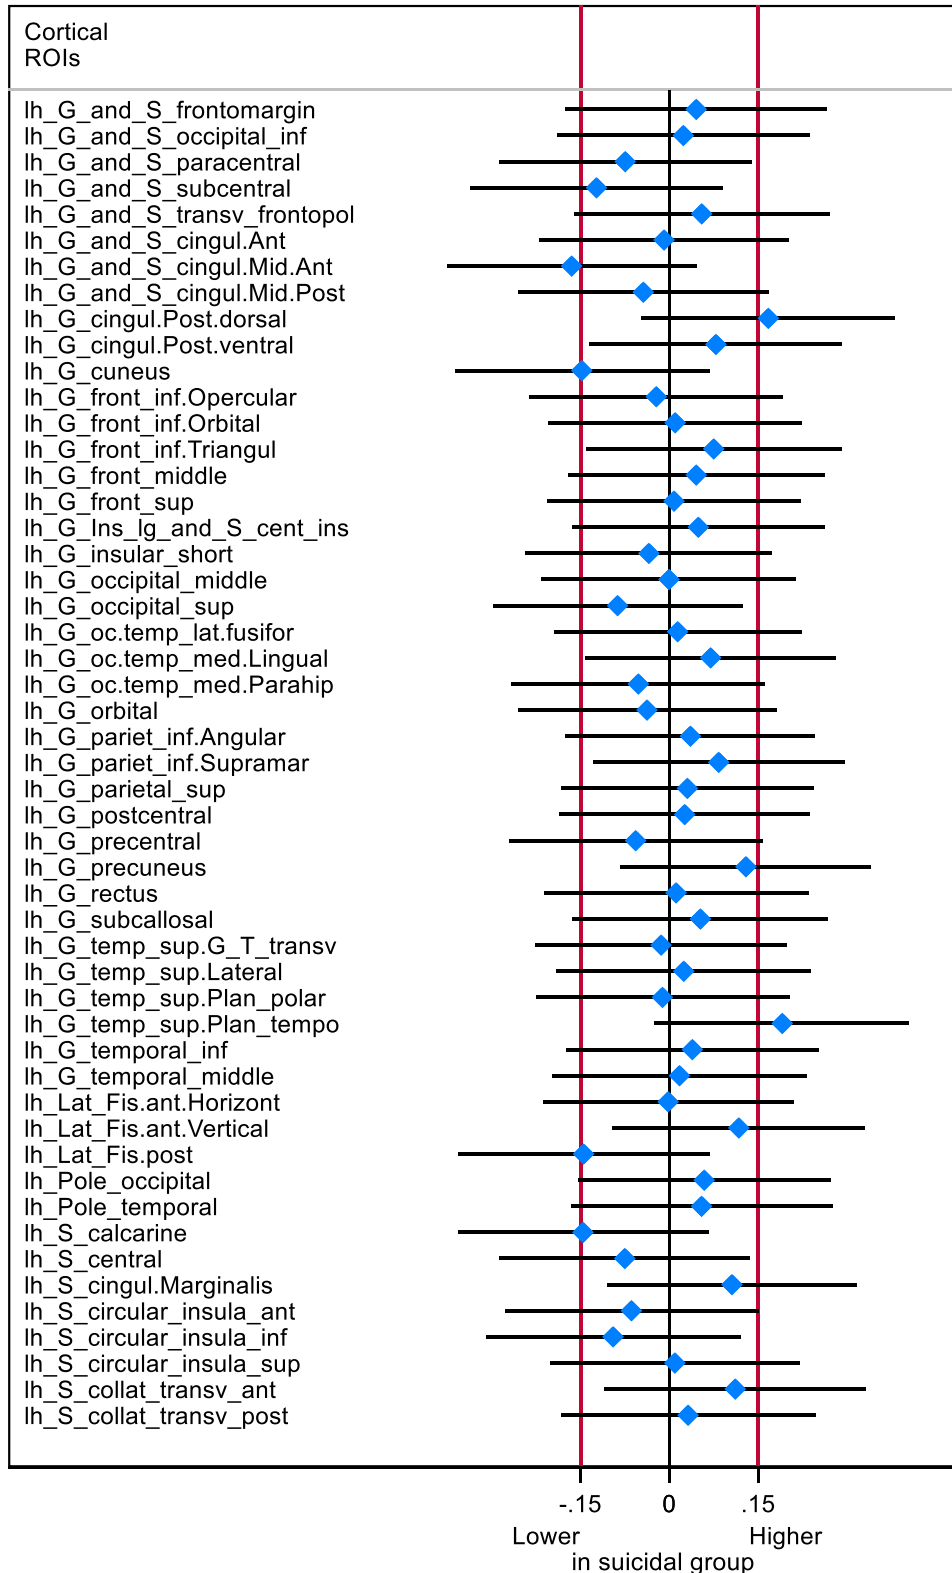

**eFigure 41 (1 of 3).** Results of the Equivalence test for differences in functional activity in cortical regions between the never-suicidal group and the concordantly-reported suicidality group for failed stops. The figure shows the effect sizes and 95% confidence intervals of the difference against the interval of equivalence (-0.15 to 0.15).

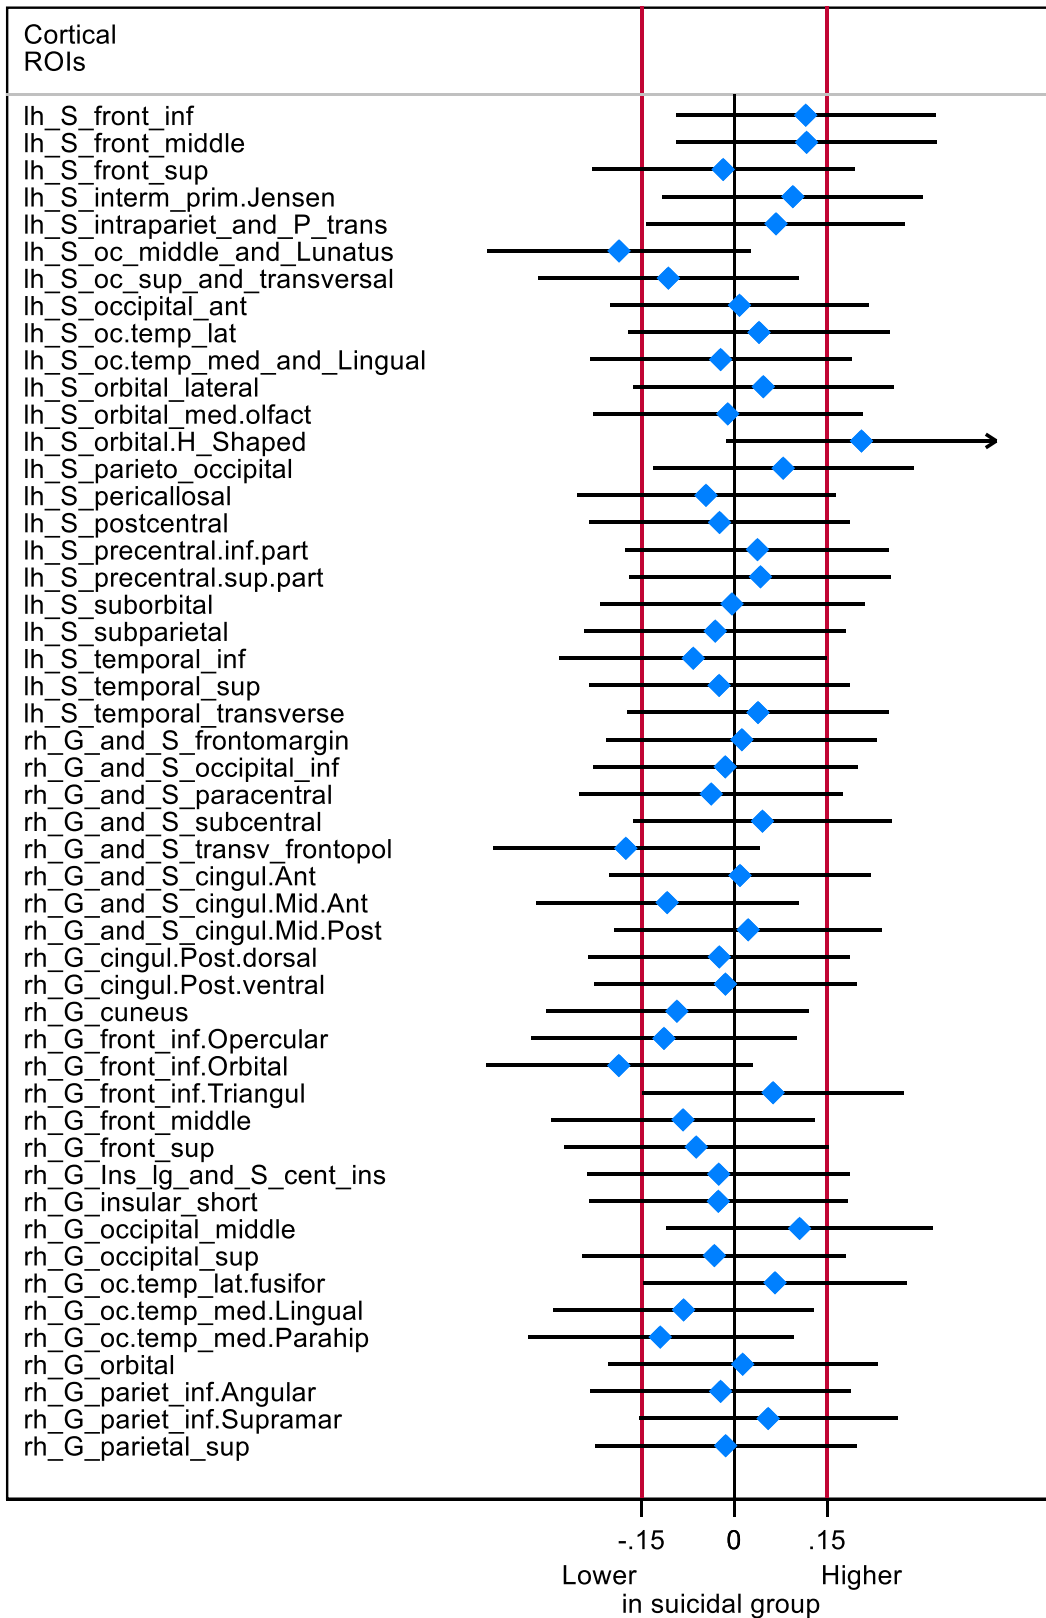

**eFigure 41 (2 of 3).** Results of the Equivalence test for differences in functional activity in cortical regions between the never-suicidal group and the concordantly-reported suicidality group for failed stops. The figure shows the effect sizes and 95% confidence intervals of the difference against the interval of equivalence (-0.15 to 0.15).

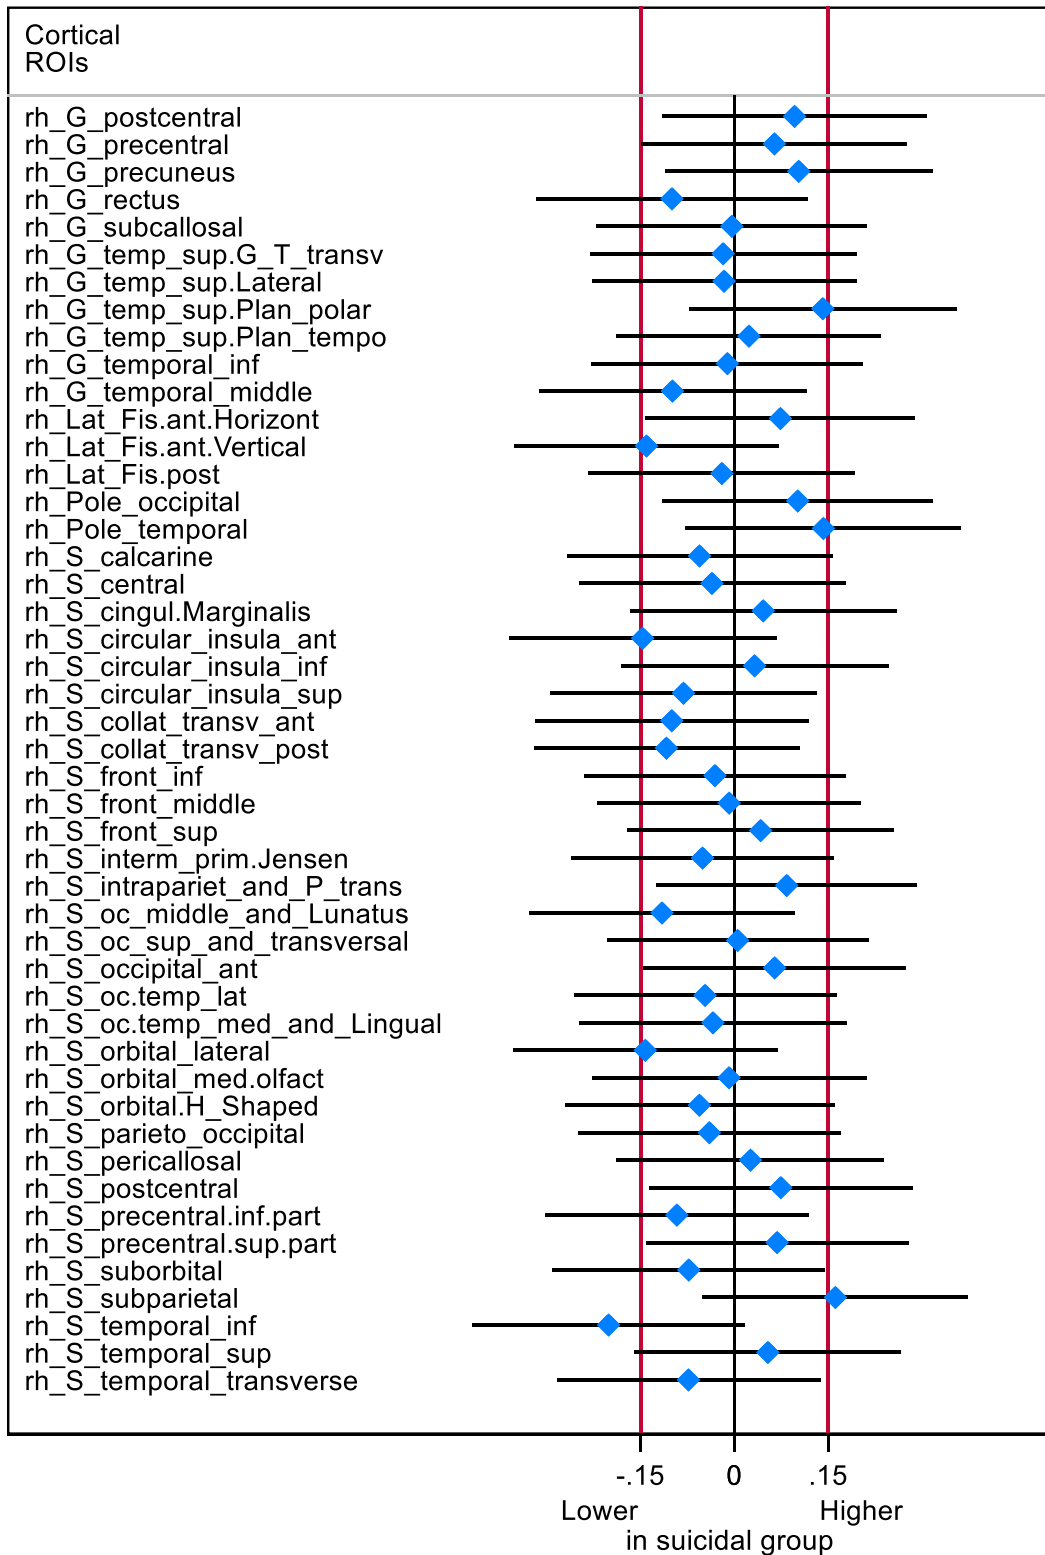

**eFigure 41 (3 of 3).** Results of the Equivalence test for differences in functional activity in cortical regions between the never-suicidal group and the concordantly-reported suicidality group for failed stops. The figure shows the effect sizes and 95% confidence intervals of the difference against the interval of equivalence (-0.15 to 0.15).

Correct stop vs correct go

| <b>eTable 26. Differences in functional activity between the never-suicidal group and the child-reported suicidality group for correct stops: Welch's t-test</b> |             |               |          |                |              |
|------------------------------------------------------------------------------------------------------------------------------------------------------------------|-------------|---------------|----------|----------------|--------------|
| <b>ROIs</b>                                                                                                                                                      | <b>Mean</b> | <b>95%CI</b>  | <b>t</b> | <b>p (unc)</b> | <b>p FDR</b> |
| <b>Subcortical regions</b>                                                                                                                                       |             |               |          |                |              |
| Left.Cerebellum.Cortex                                                                                                                                           | -0.007      | -0.026, 0.013 | -0.68    | 0.499          | 0.985        |
| Left.Thalamus.Proper                                                                                                                                             | 0.005       | -0.006, 0.016 | 0.86     | 0.390          | 0.985        |
| Left.Caudate                                                                                                                                                     | 0.009       | -0.007, 0.025 | 1.11     | 0.270          | 0.925        |
| Left.Putamen                                                                                                                                                     | 0.008       | -0.006, 0.022 | 1.18     | 0.239          | 0.925        |
| Left.Pallidum                                                                                                                                                    | 0.003       | -0.008, 0.015 | 0.57     | 0.569          | 0.985        |
| Brain.Stem                                                                                                                                                       | -0.004      | -0.016, 0.009 | -0.62    | 0.537          | 0.985        |
| Left.Hippocampus                                                                                                                                                 | 0.005       | -0.007, 0.017 | 0.81     | 0.418          | 0.985        |
| Left.Amygdala                                                                                                                                                    | 0.004       | -0.011, 0.019 | 0.50     | 0.616          | 0.985        |
| Left.Accumbens.area                                                                                                                                              | 0.011       | -0.007, 0.028 | 1.22     | 0.224          | 0.925        |
| Left.VentralDC                                                                                                                                                   | 0.009       | -0.004, 0.022 | 1.32     | 0.189          | 0.925        |
| Right.Cerebellum.Cortex                                                                                                                                          | 0.005       | -0.015, 0.025 | 0.52     | 0.604          | 0.985        |
| Right.Thalamus.Proper                                                                                                                                            | 0.002       | -0.01, 0.014  | 0.35     | 0.728          | 0.985        |
| Right.Caudate                                                                                                                                                    | -0.002      | -0.019, 0.015 | -0.19    | 0.853          | 0.985        |
| Right.Putamen                                                                                                                                                    | -0.001      | -0.015, 0.013 | -0.09    | 0.927          | 0.985        |
| Right.Pallidum                                                                                                                                                   | 0.005       | -0.006, 0.016 | 0.90     | 0.366          | 0.985        |
| Right.Hippocampus                                                                                                                                                | 0.002       | -0.01, 0.014  | 0.31     | 0.758          | 0.985        |
| Right.Amygdala                                                                                                                                                   | 0.009       | -0.007, 0.024 | 1.06     | 0.291          | 0.925        |
| Right.Accumbens.area                                                                                                                                             | 0.004       | -0.013, 0.021 | 0.44     | 0.662          | 0.985        |
| Right.VentralDC                                                                                                                                                  | 0.003       | -0.01, 0.016  | 0.41     | 0.684          | 0.985        |
| <b>Cortical regions</b>                                                                                                                                          |             |               |          |                |              |
| lh_G_and_S_frontomargin                                                                                                                                          | -0.003      | -0.03, 0.024  | -0.21    | 0.836          | 0.985        |
| lh_G_and_S_occipital_inf                                                                                                                                         | 0.001       | -0.021, 0.023 | 0.10     | 0.921          | 0.985        |
| lh_G_and_S_paracentral                                                                                                                                           | -0.002      | -0.016, 0.013 | -0.26    | 0.799          | 0.985        |
| lh_G_and_S_subcentral                                                                                                                                            | 0.015       | 0, 0.03       | 2.01     | <b>0.045</b>   | 0.925        |
| lh_G_and_S_transv_frontopol                                                                                                                                      | -0.001      | -0.026, 0.024 | -0.07    | 0.944          | 0.985        |
| lh_G_and_S_cingul.Ant                                                                                                                                            | 0.012       | -0.003, 0.027 | 1.57     | 0.116          | 0.925        |
| lh_G_and_S_cingul.Mid.Ant                                                                                                                                        | 0.010       | -0.004, 0.023 | 1.40     | 0.164          | 0.925        |
| lh_G_and_S_cingul.Mid.Post                                                                                                                                       | 0.008       | -0.004, 0.019 | 1.30     | 0.194          | 0.925        |
| lh_G_cingul.Post.dorsal                                                                                                                                          | 0.003       | -0.012, 0.019 | 0.42     | 0.673          | 0.985        |
| lh_G_cingul.Post.ventral                                                                                                                                         | -0.003      | -0.035, 0.029 | -0.19    | 0.852          | 0.985        |
| lh_G_cuneus                                                                                                                                                      | 0.002       | -0.019, 0.022 | 0.15     | 0.879          | 0.985        |
| lh_G_front_inf.Opercular                                                                                                                                         | 0.004       | -0.01, 0.017  | 0.54     | 0.591          | 0.985        |
| lh_G_front_inf.Orbital                                                                                                                                           | 0.013       | -0.009, 0.035 | 1.19     | 0.234          | 0.925        |
| lh_G_front_inf.Triangul                                                                                                                                          | 0.007       | -0.011, 0.025 | 0.74     | 0.459          | 0.985        |
| lh_G_front_middle                                                                                                                                                | 0.003       | -0.012, 0.017 | 0.34     | 0.731          | 0.985        |
| lh_G_front_sup                                                                                                                                                   | 0.009       | -0.001, 0.02  | 1.70     | 0.090          | 0.925        |
| lh_G_Ins_lg_and_S_cent_ins                                                                                                                                       | 0.007       | -0.007, 0.021 | 1.02     | 0.310          | 0.925        |
| lh_G_insular_short                                                                                                                                               | 0.007       | -0.006, 0.019 | 1.05     | 0.292          | 0.925        |
| lh_G_occipital_middle                                                                                                                                            | 0.012       | -0.005, 0.03  | 1.37     | 0.170          | 0.925        |



**eTable 26. Differences in functional activity between the never-suicidal group and the child-reported suicidality group for correct stops: Welch's t-test**

| ROIs                         | Mean   | 95%CI         | t     | p (unc)      | p FDR |
|------------------------------|--------|---------------|-------|--------------|-------|
| lh_G_occipital_sup           | 0.000  | -0.018, 0.018 | -0.01 | 0.993        | 0.993 |
| lh_G_oc.temp_lat.fusifor     | 0.004  | -0.014, 0.023 | 0.46  | 0.644        | 0.985 |
| lh_G_oc.temp_med.Lingual     | -0.001 | -0.024, 0.022 | -0.06 | 0.952        | 0.985 |
| lh_G_oc.temp_med.Parahip     | -0.003 | -0.02, 0.014  | -0.32 | 0.750        | 0.985 |
| lh_G_orbital                 | 0.011  | -0.013, 0.035 | 0.90  | 0.369        | 0.985 |
| lh_G_pariet_inf.Angular      | 0.009  | -0.006, 0.025 | 1.19  | 0.233        | 0.925 |
| lh_G_pariet_inf.Supramar     | 0.011  | -0.002, 0.024 | 1.69  | 0.092        | 0.925 |
| lh_G_parietal_sup            | 0.000  | -0.014, 0.014 | -0.04 | 0.970        | 0.988 |
| lh_G_postcentral             | 0.012  | -0.003, 0.027 | 1.63  | 0.105        | 0.925 |
| lh_G_precentral              | 0.004  | -0.007, 0.014 | 0.64  | 0.524        | 0.985 |
| lh_G_precuneus               | 0.001  | -0.014, 0.016 | 0.14  | 0.890        | 0.985 |
| lh_G_rectus                  | -0.013 | -0.055, 0.03  | -0.57 | 0.566        | 0.985 |
| lh_G_subcallosal             | 0.020  | -0.004, 0.045 | 1.62  | 0.105        | 0.925 |
| lh_G_temp_sup.G_T_transv     | 0.004  | -0.011, 0.018 | 0.51  | 0.609        | 0.985 |
| lh_G_temp_sup.Lateral        | -0.002 | -0.015, 0.011 | -0.28 | 0.779        | 0.985 |
| lh_G_temp_sup.Plan_polar     | -0.002 | -0.014, 0.01  | -0.37 | 0.710        | 0.985 |
| lh_G_temp_sup.Plan_tempo     | 0.010  | -0.005, 0.024 | 1.33  | 0.185        | 0.925 |
| lh_G_temporal_inf            | 0.022  | 0.001, 0.043  | 2.08  | <b>0.038</b> | 0.925 |
| lh_G_temporal_middle         | 0.005  | -0.01, 0.02   | 0.68  | 0.497        | 0.985 |
| lh_Lat_Fis.ant.Horizontal    | 0.005  | -0.014, 0.024 | 0.52  | 0.602        | 0.985 |
| lh_Lat_Fis.ant.Vertical      | -0.002 | -0.022, 0.019 | -0.18 | 0.861        | 0.985 |
| lh_Lat_Fis.post              | 0.009  | -0.005, 0.024 | 1.26  | 0.210        | 0.925 |
| lh_Pole_occipital            | 0.004  | -0.025, 0.033 | 0.27  | 0.785        | 0.985 |
| lh_Pole_temporal             | 0.013  | -0.007, 0.032 | 1.29  | 0.197        | 0.925 |
| lh_S_calcarine               | 0.001  | -0.019, 0.022 | 0.14  | 0.886        | 0.985 |
| lh_S_central                 | 0.014  | -0.001, 0.028 | 1.90  | 0.059        | 0.925 |
| lh_S_cingul.Marginalis       | 0.011  | -0.003, 0.024 | 1.57  | 0.118        | 0.925 |
| lh_S_circular_insula_ant     | 0.005  | -0.011, 0.022 | 0.62  | 0.536        | 0.985 |
| lh_S_circular_insula_inf     | 0.001  | -0.012, 0.013 | 0.08  | 0.937        | 0.985 |
| lh_S_circular_insula_sup     | 0.019  | 0.006, 0.033  | 2.76  | <b>0.006</b> | 0.925 |
| lh_S_collat_transv_ant       | -0.004 | -0.026, 0.018 | -0.33 | 0.739        | 0.985 |
| lh_S_collat_transv_post      | -0.003 | -0.022, 0.017 | -0.25 | 0.801        | 0.985 |
| lh_S_front_inf               | 0.008  | -0.007, 0.024 | 1.05  | 0.294        | 0.925 |
| lh_S_front_middle            | 0.008  | -0.009, 0.025 | 0.96  | 0.339        | 0.976 |
| lh_S_front_sup               | 0.001  | -0.011, 0.014 | 0.21  | 0.835        | 0.985 |
| lh_S_interm_prim.Jensen      | 0.013  | -0.006, 0.032 | 1.35  | 0.179        | 0.925 |
| lh_S_intrapariet_and_P_trans | 0.004  | -0.012, 0.021 | 0.51  | 0.612        | 0.985 |
| lh_S_oc_middle_and_Lunatus   | 0.002  | -0.018, 0.023 | 0.22  | 0.824        | 0.985 |
| lh_S_oc_sup_and_transversal  | -0.012 | -0.03, 0.006  | -1.32 | 0.186        | 0.925 |
| lh_S_occipital_ant           | 0.002  | -0.014, 0.019 | 0.28  | 0.778        | 0.985 |
| lh_S_oc.temp_lat             | 0.016  | 0.001, 0.031  | 2.14  | <b>0.033</b> | 0.925 |
| lh_S_oc.temp_med_and_Lingual | 0.007  | -0.007, 0.021 | 0.93  | 0.354        | 0.985 |
| lh_S_orbital_lateral         | 0.018  | -0.004, 0.04  | 1.58  | 0.115        | 0.925 |

**eTable 26. Differences in functional activity between the never-suicidal group and the child-reported suicidality group for correct stops: Welch's t-test**

| ROIs                        | Mean   | 95%CI         | t     | p (unc)      | p FDR |
|-----------------------------|--------|---------------|-------|--------------|-------|
| lh_S_orbital_med.olfact     | 0.002  | -0.036, 0.039 | 0.10  | 0.920        | 0.985 |
| lh_S_orbital.H_Shaped       | 0.009  | -0.01, 0.027  | 0.93  | 0.351        | 0.985 |
| lh_S_parieto_occipital      | 0.004  | -0.012, 0.021 | 0.55  | 0.583        | 0.985 |
| lh_S_pericallosal           | 0.009  | -0.009, 0.026 | 0.99  | 0.324        | 0.950 |
| lh_S_postcentral            | 0.005  | -0.007, 0.018 | 0.86  | 0.388        | 0.985 |
| lh_S_precentral.inf.part    | 0.011  | -0.005, 0.026 | 1.39  | 0.167        | 0.925 |
| lh_S_precentral.sup.part    | 0.006  | -0.007, 0.018 | 0.84  | 0.400        | 0.985 |
| lh_S_suborbital             | 0.013  | -0.021, 0.047 | 0.75  | 0.453        | 0.985 |
| lh_S_subparietal            | 0.002  | -0.017, 0.02  | 0.17  | 0.865        | 0.985 |
| lh_S_temporal_inf           | 0.013  | -0.006, 0.033 | 1.38  | 0.169        | 0.925 |
| lh_S_temporal_sup           | 0.011  | -0.003, 0.024 | 1.49  | 0.136        | 0.925 |
| lh_S_temporal_transverse    | 0.001  | -0.017, 0.02  | 0.15  | 0.878        | 0.985 |
| rh_G_and_S_frontomargin     | -0.004 | -0.031, 0.023 | -0.32 | 0.751        | 0.985 |
| rh_G_and_S_occipital_inf    | -0.004 | -0.026, 0.018 | -0.34 | 0.734        | 0.985 |
| rh_G_and_S_paracentral      | -0.004 | -0.019, 0.011 | -0.52 | 0.606        | 0.985 |
| rh_G_and_S_subcentral       | 0.009  | -0.006, 0.024 | 1.17  | 0.241        | 0.925 |
| rh_G_and_S_transv_frontopol | 0.008  | -0.013, 0.029 | 0.76  | 0.451        | 0.985 |
| rh_G_and_S_cingul.Ant       | 0.018  | 0.001, 0.034  | 2.13  | <b>0.033</b> | 0.925 |
| rh_G_and_S_cingul.Mid.Ant   | 0.008  | -0.006, 0.021 | 1.12  | 0.265        | 0.925 |
| rh_G_and_S_cingul.Mid.Post  | 0.009  | -0.002, 0.019 | 1.59  | 0.113        | 0.925 |
| rh_G_cingul.Post.dorsal     | 0.001  | -0.015, 0.016 | 0.12  | 0.908        | 0.985 |
| rh_G_cingul.Post.ventral    | 0.001  | -0.027, 0.029 | 0.05  | 0.961        | 0.985 |
| rh_G_cuneus                 | 0.008  | -0.013, 0.028 | 0.71  | 0.476        | 0.985 |
| rh_G_front_inf.Opercular    | 0.013  | -0.001, 0.028 | 1.77  | 0.078        | 0.925 |
| rh_G_front_inf.Orbital      | -0.002 | -0.025, 0.02  | -0.20 | 0.840        | 0.985 |
| rh_G_front_inf.Triangul     | 0.016  | -0.001, 0.033 | 1.81  | 0.071        | 0.925 |
| rh_G_front_middle           | -0.001 | -0.017, 0.015 | -0.13 | 0.894        | 0.985 |
| rh_G_front_sup              | 0.007  | -0.004, 0.017 | 1.22  | 0.222        | 0.925 |
| rh_G_Ins_lg_and_S_cent_ins  | 0.003  | -0.012, 0.017 | 0.35  | 0.726        | 0.985 |
| rh_G_insular_short          | 0.012  | -0.001, 0.025 | 1.86  | 0.063        | 0.925 |
| rh_G_occipital_middle       | 0.004  | -0.012, 0.02  | 0.49  | 0.625        | 0.985 |
| rh_G_occipital_sup          | -0.005 | -0.022, 0.013 | -0.51 | 0.611        | 0.985 |
| rh_G_oc.temp_lat.fusifor    | -0.003 | -0.021, 0.014 | -0.36 | 0.716        | 0.985 |
| rh_G_oc.temp_med.Lingual    | 0.001  | -0.022, 0.023 | 0.07  | 0.947        | 0.985 |
| rh_G_oc.temp_med.Parahip    | 0.001  | -0.017, 0.02  | 0.13  | 0.896        | 0.985 |
| rh_G_orbital                | -0.002 | -0.026, 0.021 | -0.20 | 0.840        | 0.985 |
| rh_G_pariet_inf.Angular     | 0.008  | -0.008, 0.024 | 1.02  | 0.310        | 0.925 |
| rh_G_pariet_inf.Supramar    | 0.004  | -0.009, 0.018 | 0.61  | 0.545        | 0.985 |
| rh_G_parietal_sup           | 0.003  | -0.011, 0.018 | 0.48  | 0.633        | 0.985 |
| rh_G_postcentral            | 0.006  | -0.008, 0.019 | 0.83  | 0.410        | 0.985 |
| rh_G_precentral             | 0.004  | -0.006, 0.014 | 0.77  | 0.444        | 0.985 |
| rh_G_precuneus              | 0.012  | -0.003, 0.027 | 1.56  | 0.120        | 0.925 |
| rh_G_rectus                 | 0.007  | -0.047, 0.061 | 0.25  | 0.803        | 0.985 |

**eTable 26. Differences in functional activity between the never-suicidal group and the child-reported suicidality group for correct stops: Welch's t-test**

| ROIs                         | Mean   | 95%CI         | t     | p (unc)      | p FDR |
|------------------------------|--------|---------------|-------|--------------|-------|
| rh_G_subcallosal             | 0.022  | -0.002, 0.046 | 1.78  | 0.076        | 0.925 |
| rh_G_temp_sup.G_T_transv     | 0.007  | -0.009, 0.022 | 0.86  | 0.393        | 0.985 |
| rh_G_temp_sup.Lateral        | 0.004  | -0.008, 0.017 | 0.67  | 0.506        | 0.985 |
| rh_G_temp_sup.Plan_polar     | 0.001  | -0.01, 0.012  | 0.14  | 0.887        | 0.985 |
| rh_G_temp_sup.Plan_tempo     | 0.011  | -0.004, 0.026 | 1.49  | 0.137        | 0.925 |
| rh_G_temporal_inf            | 0.002  | -0.02, 0.024  | 0.18  | 0.860        | 0.985 |
| rh_G_temporal_middle         | 0.007  | -0.009, 0.024 | 0.89  | 0.372        | 0.985 |
| rh_Lat_Fis.ant.Horizontal    | 0.013  | -0.006, 0.031 | 1.34  | 0.181        | 0.925 |
| rh_Lat_Fis.ant.Vertical      | 0.008  | -0.015, 0.031 | 0.67  | 0.501        | 0.985 |
| rh_Lat_Fis.post              | 0.009  | -0.006, 0.025 | 1.15  | 0.250        | 0.925 |
| rh_Pole_occipital            | -0.001 | -0.028, 0.026 | -0.09 | 0.927        | 0.985 |
| rh_Pole_temporal             | 0.023  | 0.001, 0.044  | 2.07  | <b>0.039</b> | 0.925 |
| rh_S_calcarine               | -0.001 | -0.021, 0.019 | -0.06 | 0.950        | 0.985 |
| rh_S_central                 | 0.008  | -0.007, 0.022 | 1.06  | 0.289        | 0.925 |
| rh_S_cingul.Marginalis       | 0.004  | -0.009, 0.017 | 0.64  | 0.525        | 0.985 |
| rh_S_circular_insula_ant     | 0.009  | -0.008, 0.025 | 1.03  | 0.305        | 0.925 |
| rh_S_circular_insula_inf     | 0.001  | -0.013, 0.014 | 0.09  | 0.929        | 0.985 |
| rh_S_circular_insula_sup     | 0.005  | -0.01, 0.019  | 0.63  | 0.529        | 0.985 |
| rh_S_collat_transv_ant       | -0.002 | -0.023, 0.02  | -0.14 | 0.892        | 0.985 |
| rh_S_collat_transv_post      | -0.012 | -0.03, 0.006  | -1.28 | 0.201        | 0.925 |
| rh_S_front_inf               | 0.004  | -0.014, 0.022 | 0.44  | 0.658        | 0.985 |
| rh_S_front_middle            | 0.009  | -0.007, 0.026 | 1.11  | 0.268        | 0.925 |
| rh_S_front_sup               | 0.007  | -0.006, 0.02  | 1.08  | 0.280        | 0.925 |
| rh_S_interm_prim.Jensen      | 0.005  | -0.014, 0.023 | 0.48  | 0.631        | 0.985 |
| rh_S_intrapariet_and_P_trans | 0.005  | -0.011, 0.02  | 0.57  | 0.569        | 0.985 |
| rh_S_oc_middle_and_Lunatus   | -0.001 | -0.021, 0.02  | -0.05 | 0.956        | 0.985 |
| rh_S_oc_sup_and_transversal  | 0.001  | -0.016, 0.018 | 0.14  | 0.889        | 0.985 |
| rh_S_occipital_ant           | -0.005 | -0.022, 0.013 | -0.52 | 0.604        | 0.985 |
| rh_S_oc.temp_lat             | 0.008  | -0.007, 0.024 | 1.04  | 0.299        | 0.925 |
| rh_S_oc.temp_med_and_Lingual | -0.001 | -0.014, 0.013 | -0.12 | 0.907        | 0.985 |
| rh_S_orbital_lateral         | 0.016  | -0.007, 0.039 | 1.38  | 0.169        | 0.925 |
| rh_S_orbital_med.olfact      | 0.009  | -0.031, 0.049 | 0.46  | 0.644        | 0.985 |
| rh_S_orbital.H_Shaped        | 0.004  | -0.016, 0.023 | 0.37  | 0.712        | 0.985 |
| rh_S_parieto_occipital       | 0.004  | -0.012, 0.02  | 0.45  | 0.650        | 0.985 |
| rh_S_pericallosal            | 0.016  | -0.004, 0.035 | 1.57  | 0.117        | 0.925 |
| rh_S_postcentral             | 0.000  | -0.012, 0.012 | 0.01  | 0.992        | 0.993 |
| rh_S_precentral.inf.part     | 0.000  | -0.017, 0.017 | -0.02 | 0.984        | 0.993 |
| rh_S_precentral.sup.part     | 0.004  | -0.008, 0.017 | 0.64  | 0.524        | 0.985 |
| rh_S_suborbital              | 0.006  | -0.039, 0.052 | 0.27  | 0.784        | 0.985 |
| rh_S_subparietal             | 0.005  | -0.013, 0.023 | 0.51  | 0.612        | 0.985 |
| rh_S_temporal_inf            | 0.005  | -0.018, 0.028 | 0.41  | 0.685        | 0.985 |
| rh_S_temporal_sup            | 0.006  | -0.008, 0.019 | 0.79  | 0.432        | 0.985 |
| rh_S_temporal_transverse     | 0.005  | -0.015, 0.025 | 0.51  | 0.608        | 0.985 |

**eTable 26. Differences in functional activity between the never-suicidal group and the child-reported suicidality group for correct stops: Welch's t-test**

| ROIs | Mean | 95%CI | t | p (unc) | p FDR |
|------|------|-------|---|---------|-------|
|------|------|-------|---|---------|-------|

**Bold** denotes group differences at p<0.05 uncorrected

**eTable 27. Differences in functional activity between the never-suicidal group and the caregiver-reported suicidality group for correct stops: Welch's t-test**

| ROIs                        | Mean   | 95%CI         | t     | p (unc)      | p FDR |
|-----------------------------|--------|---------------|-------|--------------|-------|
| <b>Subcortical regions</b>  |        |               |       |              |       |
| Left.Cerebellum.Cortex      | -0.003 | -0.022, 0.016 | -0.29 | 0.770        | 0.940 |
| Left.Thalamus.Proper        | -0.003 | -0.014, 0.009 | -0.44 | 0.658        | 0.940 |
| Left.Caudate                | -0.002 | -0.019, 0.015 | -0.23 | 0.818        | 0.940 |
| Left.Putamen                | 0.006  | -0.009, 0.02  | 0.77  | 0.445        | 0.917 |
| Left.Pallidum               | 0.008  | -0.003, 0.019 | 1.37  | 0.170        | 0.801 |
| Brain.Stem                  | 0.006  | -0.006, 0.019 | 0.97  | 0.334        | 0.916 |
| Left.Hippocampus            | 0.011  | -0.001, 0.023 | 1.87  | 0.062        | 0.801 |
| Left.Amygdala               | 0.008  | -0.006, 0.022 | 1.17  | 0.242        | 0.877 |
| Left.Accumbens.area         | 0.000  | -0.017, 0.018 | 0.05  | 0.962        | 0.989 |
| Left.VentralDC              | 0.000  | -0.013, 0.014 | 0.07  | 0.948        | 0.989 |
| Right.Cerebellum.Cortex     | 0.017  | -0.003, 0.038 | 1.68  | 0.095        | 0.801 |
| Right.Thalamus.Proper       | 0.001  | -0.011, 0.013 | 0.23  | 0.819        | 0.940 |
| Right.Caudate               | -0.004 | -0.023, 0.014 | -0.47 | 0.638        | 0.940 |
| Right.Putamen               | -0.002 | -0.017, 0.012 | -0.30 | 0.761        | 0.940 |
| Right.Pallidum              | 0.004  | -0.007, 0.016 | 0.77  | 0.443        | 0.917 |
| Right.Hippocampus           | 0.006  | -0.006, 0.019 | 1.05  | 0.293        | 0.903 |
| Right.Amygdala              | 0.019  | 0.004, 0.033  | 2.49  | <b>0.013</b> | 0.801 |
| Right.Accumbens.area        | 0.003  | -0.014, 0.021 | 0.37  | 0.712        | 0.940 |
| Right.VentralDC             | 0.003  | -0.011, 0.017 | 0.39  | 0.700        | 0.940 |
| <b>Cortical regions</b>     |        |               |       |              |       |
| lh_G_and_S_frontomargin     | 0.019  | -0.007, 0.046 | 1.44  | 0.150        | 0.801 |
| lh_G_and_S_occipital_inf    | -0.004 | -0.027, 0.02  | -0.32 | 0.746        | 0.940 |
| lh_G_and_S_paracentral      | 0.004  | -0.011, 0.019 | 0.58  | 0.564        | 0.937 |
| lh_G_and_S_subcentral       | 0.003  | -0.012, 0.019 | 0.39  | 0.696        | 0.940 |
| lh_G_and_S_transv_frontopol | 0.013  | -0.012, 0.039 | 1.01  | 0.314        | 0.903 |
| lh_G_and_S_cingul.Ant       | 0.009  | -0.007, 0.025 | 1.08  | 0.281        | 0.903 |
| lh_G_and_S_cingul.Mid.Ant   | -0.001 | -0.014, 0.012 | -0.15 | 0.884        | 0.958 |
| lh_G_and_S_cingul.Mid.Post  | 0.005  | -0.007, 0.017 | 0.80  | 0.421        | 0.916 |
| lh_G_cingul.Post.dorsal     | 0.012  | -0.003, 0.028 | 1.57  | 0.116        | 0.801 |
| lh_G_cingul.Post.ventral    | 0.012  | -0.02, 0.043  | 0.72  | 0.472        | 0.932 |
| lh_G_cuneus                 | -0.014 | -0.034, 0.006 | -1.34 | 0.180        | 0.801 |
| lh_G_front_inf.Opercular    | 0.002  | -0.012, 0.016 | 0.24  | 0.813        | 0.940 |
| lh_G_front_inf.Orbital      | 0.010  | -0.012, 0.032 | 0.86  | 0.390        | 0.916 |

**eTable 27. Differences in functional activity between the never-suicidal group and the caregiver-reported suicidality group for correct stops: Welch's t-test**

| ROIs                         | Mean   | 95%CI         | t     | p (unc)      | p FDR |
|------------------------------|--------|---------------|-------|--------------|-------|
| lh_G_front_inf.Triangul      | 0.006  | -0.013, 0.026 | 0.64  | 0.521        | 0.937 |
| lh_G_front_middle            | 0.001  | -0.014, 0.016 | 0.12  | 0.907        | 0.972 |
| lh_G_front_sup               | 0.002  | -0.008, 0.013 | 0.46  | 0.642        | 0.940 |
| lh_G_Ins_lg_and_S_cent_ins   | 0.015  | 0, 0.03       | 2.03  | <b>0.043</b> | 0.801 |
| lh_G_insular_short           | 0.003  | -0.01, 0.016  | 0.42  | 0.672        | 0.940 |
| lh_G_occipital_middle        | 0.002  | -0.016, 0.019 | 0.21  | 0.836        | 0.940 |
| lh_G_occipital_sup           | -0.003 | -0.02, 0.014  | -0.34 | 0.737        | 0.940 |
| lh_G_oc.temp_lat.fusifor     | 0.009  | -0.01, 0.027  | 0.92  | 0.356        | 0.916 |
| lh_G_oc.temp_med.Lingual     | 0.008  | -0.016, 0.032 | 0.63  | 0.529        | 0.937 |
| lh_G_oc.temp_med.Parahip     | 0.007  | -0.009, 0.023 | 0.84  | 0.399        | 0.916 |
| lh_G_orbital                 | 0.021  | -0.003, 0.046 | 1.71  | 0.089        | 0.801 |
| lh_G_pariet_inf.Angular      | 0.013  | -0.003, 0.029 | 1.63  | 0.103        | 0.801 |
| lh_G_pariet_inf.Supramar     | 0.007  | -0.006, 0.021 | 1.04  | 0.297        | 0.903 |
| lh_G_parietal_sup            | 0.009  | -0.006, 0.023 | 1.21  | 0.225        | 0.855 |
| lh_G_postcentral             | -0.006 | -0.021, 0.01  | -0.71 | 0.481        | 0.932 |
| lh_G_precentral              | 0.001  | -0.011, 0.012 | 0.11  | 0.913        | 0.972 |
| lh_G_precuneus               | 0.016  | 0.001, 0.031  | 2.04  | <b>0.042</b> | 0.801 |
| lh_G_rectus                  | 0.024  | -0.023, 0.071 | 1.02  | 0.310        | 0.903 |
| lh_G_subcallosal             | 0.004  | -0.022, 0.029 | 0.28  | 0.778        | 0.940 |
| lh_G_temp_sup.G_T_transv     | 0.014  | 0, 0.029      | 1.90  | 0.058        | 0.801 |
| lh_G_temp_sup.Lateral        | 0.005  | -0.008, 0.018 | 0.72  | 0.470        | 0.932 |
| lh_G_temp_sup.Plan_polar     | 0.007  | -0.004, 0.019 | 1.24  | 0.215        | 0.850 |
| lh_G_temp_sup.Plan_tempo     | 0.006  | -0.009, 0.021 | 0.80  | 0.423        | 0.916 |
| lh_G_temporal_inf            | 0.007  | -0.014, 0.028 | 0.63  | 0.532        | 0.937 |
| lh_G_temporal_middle         | 0.012  | -0.004, 0.027 | 1.45  | 0.147        | 0.801 |
| lh_Lat_Fis.ant.Horizontal    | -0.005 | -0.024, 0.014 | -0.55 | 0.586        | 0.937 |
| lh_Lat_Fis.ant.Vertical      | -0.005 | -0.028, 0.018 | -0.44 | 0.662        | 0.940 |
| lh_Lat_Fis.post              | 0.012  | -0.004, 0.028 | 1.43  | 0.154        | 0.801 |
| lh_Pole_occipital            | 0.003  | -0.023, 0.03  | 0.26  | 0.794        | 0.940 |
| lh_Pole_temporal             | 0.017  | -0.002, 0.036 | 1.78  | 0.076        | 0.801 |
| lh_S_calcarine               | -0.007 | -0.028, 0.014 | -0.67 | 0.502        | 0.932 |
| lh_S_central                 | 0.008  | -0.008, 0.023 | 0.96  | 0.338        | 0.916 |
| lh_S_cingul.Marginalis       | 0.011  | -0.003, 0.026 | 1.56  | 0.119        | 0.801 |
| lh_S_circular_insula_ant     | -0.005 | -0.023, 0.012 | -0.59 | 0.555        | 0.937 |
| lh_S_circular_insula_inf     | 0.004  | -0.009, 0.017 | 0.61  | 0.539        | 0.937 |
| lh_S_circular_insula_sup     | 0.006  | -0.009, 0.022 | 0.84  | 0.401        | 0.916 |
| lh_S_collat_transv_ant       | 0.003  | -0.019, 0.025 | 0.30  | 0.766        | 0.940 |
| lh_S_collat_transv_post      | 0.000  | -0.019, 0.02  | 0.02  | 0.980        | 0.989 |
| lh_S_front_inf               | 0.003  | -0.014, 0.02  | 0.35  | 0.729        | 0.940 |
| lh_S_front_middle            | 0.007  | -0.01, 0.024  | 0.78  | 0.433        | 0.916 |
| lh_S_front_sup               | 0.002  | -0.011, 0.015 | 0.28  | 0.783        | 0.940 |
| lh_S_interm_prim.Jensen      | -0.002 | -0.021, 0.018 | -0.16 | 0.870        | 0.956 |
| lh_S_intrapariet_and_P_trans | 0.003  | -0.014, 0.02  | 0.34  | 0.731        | 0.940 |

**eTable 27. Differences in functional activity between the never-suicidal group and the caregiver-reported suicidality group for correct stops: Welch's t-test**

| ROIs                         | Mean   | 95%CI          | t     | p (unc)      | p FDR |
|------------------------------|--------|----------------|-------|--------------|-------|
| lh_S_oc_middle_and_Lunatus   | 0.000  | -0.021, 0.021  | -0.02 | 0.983        | 0.989 |
| lh_S_oc_sup_and_transversal  | 0.005  | -0.012, 0.023  | 0.58  | 0.563        | 0.937 |
| lh_S_occipital_ant           | -0.001 | -0.019, 0.016  | -0.16 | 0.876        | 0.956 |
| lh_S_oc.temp_lat             | 0.008  | -0.007, 0.024  | 1.03  | 0.306        | 0.903 |
| lh_S_oc.temp_med_and_Lingual | 0.010  | -0.005, 0.025  | 1.31  | 0.192        | 0.801 |
| lh_S_orbital_lateral         | 0.006  | -0.017, 0.03   | 0.53  | 0.595        | 0.937 |
| lh_S_orbital_med.olfact      | 0.011  | -0.028, 0.05   | 0.55  | 0.583        | 0.937 |
| lh_S_orbital.H_Shaped        | 0.007  | -0.012, 0.027  | 0.74  | 0.458        | 0.932 |
| lh_S_parieto_occipital       | 0.012  | -0.005, 0.028  | 1.41  | 0.159        | 0.801 |
| lh_S_pericallosal            | 0.007  | -0.011, 0.025  | 0.79  | 0.430        | 0.916 |
| lh_S_postcentral             | 0.000  | -0.013, 0.014  | 0.02  | 0.982        | 0.989 |
| lh_S_precentral.inf.part     | 0.014  | -0.003, 0.031  | 1.63  | 0.103        | 0.801 |
| lh_S_precentral.sup.part     | 0.011  | -0.003, 0.025  | 1.53  | 0.127        | 0.801 |
| lh_S_suborbital              | 0.033  | 0, 0.067       | 1.94  | 0.053        | 0.801 |
| lh_S_subparietal             | 0.014  | -0.005, 0.033  | 1.42  | 0.158        | 0.801 |
| lh_S_temporal_inf            | 0.010  | -0.011, 0.031  | 0.95  | 0.343        | 0.916 |
| lh_S_temporal_sup            | 0.008  | -0.007, 0.022  | 1.05  | 0.295        | 0.903 |
| lh_S_temporal_transverse     | -0.002 | -0.021, 0.017  | -0.20 | 0.839        | 0.940 |
| rh_G_and_S_frontomargin      | -0.010 | -0.038, 0.018  | -0.69 | 0.491        | 0.932 |
| rh_G_and_S_occipital_inf     | -0.010 | -0.033, 0.013  | -0.85 | 0.398        | 0.916 |
| rh_G_and_S_paracentral       | 0.013  | -0.004, 0.029  | 1.53  | 0.127        | 0.801 |
| rh_G_and_S_subcentral        | 0.011  | -0.005, 0.027  | 1.34  | 0.182        | 0.801 |
| rh_G_and_S_transv_frontopol  | -0.001 | -0.024, 0.023  | -0.05 | 0.957        | 0.989 |
| rh_G_and_S_cingul.Ant        | 0.011  | -0.005, 0.027  | 1.33  | 0.184        | 0.801 |
| rh_G_and_S_cingul.Mid.Ant    | 0.002  | -0.012, 0.016  | 0.28  | 0.779        | 0.940 |
| rh_G_and_S_cingul.Mid.Post   | 0.013  | 0.001, 0.025   | 2.15  | <b>0.032</b> | 0.801 |
| rh_G_cingul.Post.dorsal      | 0.010  | -0.005, 0.025  | 1.31  | 0.191        | 0.801 |
| rh_G_cingul.Post.ventral     | 0.015  | -0.012, 0.042  | 1.11  | 0.267        | 0.903 |
| rh_G_cuneus                  | 0.002  | -0.019, 0.023  | 0.21  | 0.835        | 0.940 |
| rh_G_front_inf.Opercular     | 0.006  | -0.009, 0.022  | 0.79  | 0.429        | 0.916 |
| rh_G_front_inf.Orbital       | -0.024 | -0.046, -0.003 | -2.20 | <b>0.028</b> | 0.801 |
| rh_G_front_inf.Triangul      | 0.007  | -0.013, 0.026  | 0.68  | 0.497        | 0.932 |
| rh_G_front_middle            | -0.012 | -0.028, 0.005  | -1.42 | 0.157        | 0.801 |
| rh_G_front_sup               | 0.003  | -0.008, 0.014  | 0.51  | 0.613        | 0.940 |
| rh_G_Ins_lg_and_S_cent_ins   | 0.007  | -0.009, 0.022  | 0.88  | 0.381        | 0.916 |
| rh_G_insular_short           | -0.002 | -0.016, 0.012  | -0.25 | 0.800        | 0.940 |
| rh_G_occipital_middle        | -0.002 | -0.018, 0.015  | -0.20 | 0.839        | 0.940 |
| rh_G_occipital_sup           | 0.012  | -0.006, 0.029  | 1.27  | 0.205        | 0.835 |
| rh_G_oc.temp_lat.fusifor     | 0.010  | -0.008, 0.029  | 1.14  | 0.254        | 0.884 |
| rh_G_oc.temp_med.Lingual     | 0.003  | -0.021, 0.026  | 0.23  | 0.815        | 0.940 |
| rh_G_oc.temp_med.Parahip     | -0.005 | -0.024, 0.013  | -0.54 | 0.591        | 0.937 |
| rh_G_orbital                 | -0.001 | -0.028, 0.025  | -0.10 | 0.919        | 0.972 |
| rh_G_pariet_inf.Angular      | 0.003  | -0.014, 0.02   | 0.35  | 0.727        | 0.940 |

**eTable 27. Differences in functional activity between the never-suicidal group and the caregiver-reported suicidality group for correct stops: Welch's t-test**

| ROIs                         | Mean   | 95%CI         | t     | p (unc)      | p FDR |
|------------------------------|--------|---------------|-------|--------------|-------|
| rh_G_pariet_inf.Supramar     | 0.003  | -0.011, 0.017 | 0.39  | 0.695        | 0.940 |
| rh_G_parietal_sup            | 0.001  | -0.013, 0.015 | 0.16  | 0.870        | 0.956 |
| rh_G_postcentral             | 0.005  | -0.01, 0.021  | 0.69  | 0.493        | 0.932 |
| rh_G_precentral              | 0.006  | -0.006, 0.018 | 1.04  | 0.299        | 0.903 |
| rh_G_precuneus               | 0.015  | 0.001, 0.03   | 2.06  | <b>0.040</b> | 0.801 |
| rh_G_rectus                  | 0.015  | -0.045, 0.075 | 0.48  | 0.630        | 0.940 |
| rh_G_subcallosal             | 0.011  | -0.013, 0.036 | 0.91  | 0.361        | 0.916 |
| rh_G_temp_sup.G_T_transv     | 0.005  | -0.012, 0.021 | 0.56  | 0.577        | 0.937 |
| rh_G_temp_sup.Lateral        | 0.005  | -0.007, 0.018 | 0.83  | 0.405        | 0.916 |
| rh_G_temp_sup.Plan_polar     | 0.001  | -0.01, 0.012  | 0.10  | 0.919        | 0.972 |
| rh_G_temp_sup.Plan_tempo     | 0.018  | 0.003, 0.033  | 2.36  | <b>0.019</b> | 0.801 |
| rh_G_temporal_inf            | -0.003 | -0.026, 0.021 | -0.22 | 0.830        | 0.940 |
| rh_G_temporal_middle         | 0.011  | -0.005, 0.027 | 1.39  | 0.165        | 0.801 |
| rh_Lat_Fis.ant.Horizontal    | -0.017 | -0.036, 0.002 | -1.71 | 0.088        | 0.801 |
| rh_Lat_Fis.ant.Vertical      | -0.001 | -0.026, 0.024 | -0.09 | 0.926        | 0.973 |
| rh_Lat_Fis.post              | 0.011  | -0.007, 0.029 | 1.23  | 0.219        | 0.850 |
| rh_Pole_occipital            | -0.011 | -0.037, 0.015 | -0.82 | 0.415        | 0.916 |
| rh_Pole_temporal             | 0.004  | -0.019, 0.027 | 0.31  | 0.754        | 0.940 |
| rh_S_calcarine               | 0.002  | -0.019, 0.024 | 0.22  | 0.826        | 0.940 |
| rh_S_central                 | 0.012  | -0.004, 0.027 | 1.49  | 0.136        | 0.801 |
| rh_S_cingul.Marginalis       | 0.010  | -0.003, 0.024 | 1.49  | 0.138        | 0.801 |
| rh_S_circular_insula_ant     | -0.012 | -0.029, 0.006 | -1.34 | 0.182        | 0.801 |
| rh_S_circular_insula_inf     | -0.003 | -0.016, 0.01  | -0.44 | 0.663        | 0.940 |
| rh_S_circular_insula_sup     | 0.000  | -0.016, 0.015 | -0.02 | 0.983        | 0.989 |
| rh_S_collat_transv_ant       | 0.003  | -0.021, 0.026 | 0.21  | 0.830        | 0.940 |
| rh_S_collat_transv_post      | 0.003  | -0.016, 0.022 | 0.30  | 0.762        | 0.940 |
| rh_S_front_inf               | -0.006 | -0.025, 0.014 | -0.58 | 0.563        | 0.937 |
| rh_S_front_middle            | 0.002  | -0.016, 0.02  | 0.20  | 0.845        | 0.941 |
| rh_S_front_sup               | 0.000  | -0.013, 0.013 | -0.01 | 0.992        | 0.992 |
| rh_S_interm_prim.Jensen      | 0.004  | -0.016, 0.023 | 0.36  | 0.716        | 0.940 |
| rh_S_intrapariet_and_P_trans | 0.003  | -0.013, 0.019 | 0.35  | 0.725        | 0.940 |
| rh_S_oc_middle_and_Lunatus   | -0.006 | -0.025, 0.014 | -0.56 | 0.573        | 0.937 |
| rh_S_oc_sup_and_transversal  | 0.013  | -0.005, 0.03  | 1.44  | 0.150        | 0.801 |
| rh_S_occipital_ant           | 0.005  | -0.013, 0.023 | 0.55  | 0.580        | 0.937 |
| rh_S_oc.temp_lat             | 0.007  | -0.008, 0.023 | 0.93  | 0.353        | 0.916 |
| rh_S_oc.temp_med_and_Lingual | 0.009  | -0.006, 0.023 | 1.16  | 0.248        | 0.880 |
| rh_S_orbital_lateral         | -0.011 | -0.036, 0.013 | -0.94 | 0.350        | 0.916 |
| rh_S_orbital_med.olfact      | -0.010 | -0.051, 0.031 | -0.47 | 0.642        | 0.940 |
| rh_S_orbital.H_Shaped        | -0.011 | -0.031, 0.009 | -1.10 | 0.270        | 0.903 |
| rh_S_parieto_occipital       | 0.016  | -0.001, 0.032 | 1.90  | 0.058        | 0.801 |
| rh_S_pericallosal            | 0.005  | -0.014, 0.025 | 0.55  | 0.584        | 0.937 |
| rh_S_postcentral             | -0.002 | -0.015, 0.011 | -0.36 | 0.718        | 0.940 |
| rh_S_precentral.inf.part     | 0.007  | -0.012, 0.025 | 0.71  | 0.481        | 0.932 |

**eTable 27. Differences in functional activity between the never-suicidal group and the caregiver-reported suicidality group for correct stops: Welch's t-test**

| ROIs                     | Mean   | 95%CI         | t     | p (unc)      | p FDR |
|--------------------------|--------|---------------|-------|--------------|-------|
| rh_S_precentral.sup.part | 0.006  | -0.008, 0.019 | 0.81  | 0.419        | 0.916 |
| rh_S_suborbital          | 0.021  | -0.026, 0.068 | 0.90  | 0.370        | 0.916 |
| rh_S_subparietal         | 0.018  | 0, 0.037      | 1.99  | <b>0.048</b> | 0.801 |
| rh_S_temporal_inf        | -0.018 | -0.041, 0.006 | -1.47 | 0.143        | 0.801 |
| rh_S_temporal_sup        | 0.009  | -0.006, 0.023 | 1.19  | 0.235        | 0.871 |
| rh_S_temporal_transverse | 0.003  | -0.016, 0.023 | 0.31  | 0.756        | 0.940 |

**Bold** denotes group differences at p<0.05 uncorrected

**eTable 28. Differences in functional activity between the never-suicidal group and the concordantly-reported suicidality group for correct stops: Welch's t-test**

| ROIs                        | Mean   | 95%CI         | t     | p (unc) | p FDR |
|-----------------------------|--------|---------------|-------|---------|-------|
| <b>Subcortical regions</b>  |        |               |       |         |       |
| Left.Cerebellum.Cortex      | -0.023 | -0.083, 0.037 | -0.76 | 0.450   | 0.994 |
| Left.Thalamus.Proper        | 0.007  | -0.024, 0.037 | 0.42  | 0.672   | 0.994 |
| Left.Caudate                | -0.003 | -0.043, 0.036 | -0.17 | 0.869   | 0.994 |
| Left.Putamen                | -0.001 | -0.037, 0.034 | -0.08 | 0.933   | 0.999 |
| Left.Pallidum               | 0.004  | -0.027, 0.034 | 0.25  | 0.801   | 0.994 |
| Brain.Stem                  | -0.007 | -0.043, 0.029 | -0.37 | 0.709   | 0.994 |
| Left.Hippocampus            | -0.025 | -0.059, 0.009 | -1.44 | 0.152   | 0.912 |
| Left.Amygdala               | -0.012 | -0.048, 0.024 | -0.65 | 0.516   | 0.994 |
| Left.Accumbens.area         | -0.008 | -0.052, 0.036 | -0.37 | 0.711   | 0.994 |
| Left.VentralDC              | -0.016 | -0.053, 0.021 | -0.87 | 0.385   | 0.994 |
| Right.Cerebellum.Cortex     | 0.015  | -0.041, 0.07  | 0.52  | 0.603   | 0.994 |
| Right.Thalamus.Proper       | -0.012 | -0.045, 0.021 | -0.72 | 0.472   | 0.994 |
| Right.Caudate               | -0.017 | -0.062, 0.027 | -0.76 | 0.446   | 0.994 |
| Right.Putamen               | -0.013 | -0.048, 0.021 | -0.77 | 0.446   | 0.994 |
| Right.Pallidum              | -0.018 | -0.049, 0.012 | -1.20 | 0.233   | 0.994 |
| Right.Hippocampus           | -0.009 | -0.042, 0.024 | -0.54 | 0.590   | 0.994 |
| Right.Amygdala              | -0.023 | -0.059, 0.013 | -1.25 | 0.214   | 0.994 |
| Right.Accumbens.area        | 0.003  | -0.046, 0.052 | 0.12  | 0.904   | 0.999 |
| Right.VentralDC             | -0.028 | -0.066, 0.01  | -1.45 | 0.151   | 0.912 |
| <b>Cortical regions</b>     |        |               |       |         |       |
| lh_G_and_S_frontomargin     | -0.019 | -0.099, 0.061 | -0.47 | 0.642   | 0.994 |
| lh_G_and_S_occipital_inf    | -0.020 | -0.088, 0.049 | -0.57 | 0.571   | 0.994 |
| lh_G_and_S_paracentral      | -0.014 | -0.053, 0.025 | -0.72 | 0.474   | 0.994 |
| lh_G_and_S_subcentral       | -0.034 | -0.076, 0.008 | -1.63 | 0.107   | 0.912 |
| lh_G_and_S_transv_frontopol | -0.004 | -0.094, 0.086 | -0.09 | 0.925   | 0.999 |
| lh_G_and_S_cingul.Ant       | -0.022 | -0.065, 0.022 | -0.99 | 0.323   | 0.994 |
| lh_G_and_S_cingul.Mid.Ant   | -0.011 | -0.047, 0.024 | -0.63 | 0.532   | 0.994 |
| lh_G_and_S_cingul.Mid.Post  | -0.007 | -0.039, 0.026 | -0.40 | 0.689   | 0.994 |
| lh_G_cingul.Post.dorsal     | 0.001  | -0.036, 0.039 | 0.06  | 0.954   | 0.999 |
| lh_G_cingul.Post.ventral    | 0.008  | -0.076, 0.093 | 0.19  | 0.847   | 0.994 |



**eTable 28. Differences in functional activity between the never-suicidal group and the concordantly-reported suicidality group for correct stops: Welch's t-test**

| ROIs                       | Mean   | 95%CI          | t     | p (unc)      | p FDR |
|----------------------------|--------|----------------|-------|--------------|-------|
| lh_G_cuneus                | -0.029 | -0.084, 0.026  | -1.06 | 0.291        | 0.994 |
| lh_G_front_inf.Opercular   | 0.029  | -0.01, 0.067   | 1.49  | 0.140        | 0.912 |
| lh_G_front_inf.Orbital     | -0.026 | -0.086, 0.034  | -0.85 | 0.396        | 0.994 |
| lh_G_front_inf.Triangul    | -0.005 | -0.056, 0.045  | -0.21 | 0.832        | 0.994 |
| lh_G_front_middle          | 0.008  | -0.036, 0.052  | 0.36  | 0.718        | 0.994 |
| lh_G_front_sup             | -0.021 | -0.047, 0.005  | -1.59 | 0.116        | 0.912 |
| lh_G_Ins_lg_and_S_cent_ins | -0.017 | -0.055, 0.021  | -0.88 | 0.382        | 0.994 |
| lh_G_insular_short         | 0.013  | -0.019, 0.046  | 0.80  | 0.424        | 0.994 |
| lh_G_occipital_middle      | -0.015 | -0.058, 0.028  | -0.70 | 0.484        | 0.994 |
| lh_G_occipital_sup         | -0.005 | -0.052, 0.043  | -0.19 | 0.849        | 0.994 |
| lh_G_oc.temp_lat.fusifor   | -0.021 | -0.07, 0.027   | -0.87 | 0.386        | 0.994 |
| lh_G_oc.temp_med.Lingual   | -0.060 | -0.131, 0.011  | -1.69 | 0.095        | 0.912 |
| lh_G_oc.temp_med.Parahip   | 0.006  | -0.048, 0.061  | 0.23  | 0.821        | 0.994 |
| lh_G_orbital               | -0.013 | -0.088, 0.061  | -0.36 | 0.720        | 0.994 |
| lh_G_pariet_inf.Angular    | 0.014  | -0.032, 0.06   | 0.61  | 0.546        | 0.994 |
| lh_G_pariet_inf.Supramar   | 0.002  | -0.034, 0.039  | 0.13  | 0.899        | 0.999 |
| lh_G_parietal_sup          | 0.001  | -0.038, 0.041  | 0.05  | 0.957        | 0.999 |
| lh_G_postcentral           | -0.008 | -0.047, 0.032  | -0.40 | 0.691        | 0.994 |
| lh_G_precentral            | -0.010 | -0.039, 0.018  | -0.73 | 0.468        | 0.994 |
| lh_G_precuneus             | 0.001  | -0.037, 0.038  | 0.03  | 0.975        | 0.999 |
| lh_G_rectus                | -0.036 | -0.196, 0.125  | -0.44 | 0.659        | 0.994 |
| lh_G_subcallosal           | -0.039 | -0.118, 0.039  | -0.99 | 0.323        | 0.994 |
| lh_G_temp_sup.G_T_transv   | -0.016 | -0.055, 0.023  | -0.82 | 0.415        | 0.994 |
| lh_G_temp_sup.Lateral      | -0.019 | -0.053, 0.014  | -1.14 | 0.258        | 0.994 |
| lh_G_temp_sup.Plan_polar   | -0.027 | -0.058, 0.004  | -1.74 | 0.085        | 0.912 |
| lh_G_temp_sup.Plan_tempo   | 0.000  | -0.042, 0.042  | 0.00  | 0.999        | 0.999 |
| lh_G_temporal_inf          | 0.048  | -0.018, 0.114  | 1.44  | 0.153        | 0.912 |
| lh_G_temporal_middle       | 0.003  | -0.039, 0.046  | 0.15  | 0.883        | 0.997 |
| lh_Lat_Fis.ant.Horizontal  | -0.064 | -0.118, -0.011 | -2.39 | <b>0.019</b> | 0.641 |
| lh_Lat_Fis.ant.Vertical    | 0.046  | -0.02, 0.112   | 1.38  | 0.170        | 0.936 |
| lh_Lat_Fis.post            | -0.008 | -0.05, 0.034   | -0.37 | 0.714        | 0.994 |
| lh_Pole_occipital          | -0.036 | -0.106, 0.035  | -1.01 | 0.316        | 0.994 |
| lh_Pole_temporal           | -0.046 | -0.102, 0.009  | -1.66 | 0.100        | 0.912 |
| lh_S_calcarine             | -0.016 | -0.077, 0.045  | -0.52 | 0.606        | 0.994 |
| lh_S_central               | -0.020 | -0.062, 0.022  | -0.93 | 0.357        | 0.994 |
| lh_S_cingul.Marginalis     | 0.002  | -0.031, 0.034  | 0.10  | 0.919        | 0.999 |
| lh_S_circular_insula_ant   | -0.009 | -0.061, 0.043  | -0.34 | 0.731        | 0.994 |
| lh_S_circular_insula_inf   | -0.019 | -0.053, 0.014  | -1.14 | 0.257        | 0.994 |
| lh_S_circular_insula_sup   | 0.000  | -0.039, 0.038  | -0.01 | 0.991        | 0.999 |
| lh_S_collat_transv_ant     | 0.020  | -0.055, 0.095  | 0.53  | 0.597        | 0.994 |
| lh_S_collat_transv_post    | -0.046 | -0.109, 0.018  | -1.42 | 0.158        | 0.912 |
| lh_S_front_inf             | 0.000  | -0.055, 0.056  | 0.01  | 0.994        | 0.999 |
| lh_S_front_middle          | -0.039 | -0.092, 0.014  | -1.46 | 0.147        | 0.912 |

**eTable 28. Differences in functional activity between the never-suicidal group and the concordantly-reported suicidality group for correct stops: Welch's t-test**

| ROIs                         | Mean   | 95%CI          | t     | p (unc)      | p FDR |
|------------------------------|--------|----------------|-------|--------------|-------|
| lh_S_front_sup               | 0.008  | -0.03, 0.045   | 0.41  | 0.683        | 0.994 |
| lh_S_interm_prim.Jensen      | 0.014  | -0.04, 0.069   | 0.52  | 0.601        | 0.994 |
| lh_S_intrapariet_and_P_trans | 0.008  | -0.041, 0.058  | 0.33  | 0.741        | 0.994 |
| lh_S_oc_middle_and_Lunatus   | -0.061 | -0.116, -0.006 | -2.19 | <b>0.031</b> | 0.865 |
| lh_S_oc_sup_and_transversal  | -0.009 | -0.059, 0.041  | -0.37 | 0.709        | 0.994 |
| lh_S_occipital_ant           | -0.008 | -0.048, 0.032  | -0.39 | 0.699        | 0.994 |
| lh_S_oc.temp_lat             | -0.024 | -0.069, 0.021  | -1.05 | 0.298        | 0.994 |
| lh_S_oc.temp_med_and_Lingual | -0.006 | -0.045, 0.034  | -0.29 | 0.769        | 0.994 |
| lh_S_orbital_lateral         | 0.000  | -0.072, 0.071  | -0.01 | 0.991        | 0.999 |
| lh_S_orbital_med.olfact      | 0.085  | -0.039, 0.209  | 1.36  | 0.179        | 0.936 |
| lh_S_orbital.H_Shaped        | -0.028 | -0.088, 0.031  | -0.95 | 0.345        | 0.994 |
| lh_S_parieto_occipital       | -0.004 | -0.046, 0.038  | -0.20 | 0.839        | 0.994 |
| lh_S_pericallosal            | -0.006 | -0.056, 0.044  | -0.23 | 0.819        | 0.994 |
| lh_S_postcentral             | -0.001 | -0.04, 0.038   | -0.05 | 0.957        | 0.999 |
| lh_S_precentral.inf.part     | 0.018  | -0.033, 0.069  | 0.70  | 0.483        | 0.994 |
| lh_S_precentral.sup.part     | 0.004  | -0.038, 0.045  | 0.18  | 0.859        | 0.994 |
| lh_S_suborbital              | -0.026 | -0.133, 0.081  | -0.49 | 0.628        | 0.994 |
| lh_S_subparietal             | -0.013 | -0.063, 0.036  | -0.53 | 0.595        | 0.994 |
| lh_S_temporal_inf            | 0.025  | -0.037, 0.087  | 0.80  | 0.426        | 0.994 |
| lh_S_temporal_sup            | -0.008 | -0.043, 0.027  | -0.46 | 0.649        | 0.994 |
| lh_S_temporal_transverse     | -0.074 | -0.129, -0.02  | -2.70 | <b>0.008</b> | 0.464 |
| rh_G_and_S_frontomargin      | -0.008 | -0.103, 0.087  | -0.17 | 0.867        | 0.994 |
| rh_G_and_S_occipital_inf     | -0.014 | -0.086, 0.058  | -0.40 | 0.693        | 0.994 |
| rh_G_and_S_paracentral       | -0.024 | -0.065, 0.017  | -1.16 | 0.250        | 0.994 |
| rh_G_and_S_subcentral        | -0.064 | -0.105, -0.023 | -3.09 | <b>0.003</b> | 0.439 |
| rh_G_and_S_transv_frontopol  | -0.033 | -0.108, 0.042  | -0.87 | 0.387        | 0.994 |
| rh_G_and_S_cingul.Ant        | -0.035 | -0.084, 0.013  | -1.44 | 0.154        | 0.912 |
| rh_G_and_S_cingul.Mid.Ant    | 0.001  | -0.038, 0.04   | 0.04  | 0.972        | 0.999 |
| rh_G_and_S_cingul.Mid.Post   | -0.004 | -0.036, 0.029  | -0.23 | 0.817        | 0.994 |
| rh_G_cingul.Post.dorsal      | 0.003  | -0.034, 0.04   | 0.17  | 0.869        | 0.994 |
| rh_G_cingul.Post.ventral     | -0.009 | -0.072, 0.054  | -0.28 | 0.780        | 0.994 |
| rh_G_cuneus                  | -0.048 | -0.104, 0.008  | -1.69 | 0.095        | 0.912 |
| rh_G_front_inf.Opercular     | 0.004  | -0.032, 0.04   | 0.21  | 0.835        | 0.994 |
| rh_G_front_inf.Orbital       | -0.029 | -0.094, 0.036  | -0.90 | 0.372        | 0.994 |
| rh_G_front_inf.Triangul      | -0.013 | -0.06, 0.034   | -0.55 | 0.585        | 0.994 |
| rh_G_front_middle            | -0.022 | -0.07, 0.027   | -0.89 | 0.377        | 0.994 |
| rh_G_front_sup               | -0.019 | -0.05, 0.012   | -1.24 | 0.218        | 0.994 |
| rh_G_Ins_lg_and_S_cent_ins   | -0.028 | -0.066, 0.01   | -1.49 | 0.140        | 0.912 |
| rh_G_insular_short           | -0.001 | -0.035, 0.034  | -0.03 | 0.974        | 0.999 |
| rh_G_occipital_middle        | -0.009 | -0.051, 0.034  | -0.41 | 0.683        | 0.994 |
| rh_G_occipital_sup           | -0.014 | -0.06, 0.032   | -0.59 | 0.557        | 0.994 |
| rh_G_oc.temp_lat.fusifor     | -0.013 | -0.073, 0.047  | -0.42 | 0.673        | 0.994 |
| rh_G_oc.temp_med.Lingual     | -0.019 | -0.092, 0.055  | -0.50 | 0.617        | 0.994 |

**eTable 28. Differences in functional activity between the never-suicidal group and the concordantly-reported suicidality group for correct stops: Welch's t-test**

| ROIs                         | Mean   | 95%CI          | t     | p (unc)      | p FDR |
|------------------------------|--------|----------------|-------|--------------|-------|
| rh_G_oc.temp_med.Parahip     | -0.021 | -0.071, 0.029  | -0.84 | 0.403        | 0.994 |
| rh_G_orbital                 | -0.008 | -0.084, 0.068  | -0.21 | 0.837        | 0.994 |
| rh_G_pariet_inf.Angular      | -0.002 | -0.047, 0.043  | -0.09 | 0.930        | 0.999 |
| rh_G_pariet_inf.Supramar     | -0.013 | -0.048, 0.021  | -0.77 | 0.445        | 0.994 |
| rh_G_parietal_sup            | -0.007 | -0.046, 0.032  | -0.37 | 0.714        | 0.994 |
| rh_G_postcentral             | -0.038 | -0.078, 0.001  | -1.91 | 0.059        | 0.912 |
| rh_G_precentral              | -0.015 | -0.046, 0.015  | -0.99 | 0.324        | 0.994 |
| rh_G_precuneus               | 0.018  | -0.025, 0.061  | 0.82  | 0.414        | 0.994 |
| rh_G_rectus                  | 0.089  | -0.086, 0.263  | 1.01  | 0.315        | 0.994 |
| rh_G_subcallosal             | -0.008 | -0.086, 0.07   | -0.20 | 0.838        | 0.994 |
| rh_G_temp_sup.G_T_transv     | -0.022 | -0.069, 0.026  | -0.91 | 0.367        | 0.994 |
| rh_G_temp_sup.Lateral        | -0.039 | -0.071, -0.007 | -2.43 | <b>0.017</b> | 0.641 |
| rh_G_temp_sup.Plan_polar     | 0.007  | -0.029, 0.042  | 0.38  | 0.707        | 0.994 |
| rh_G_temp_sup.Plan_tempo     | -0.023 | -0.064, 0.017  | -1.16 | 0.248        | 0.994 |
| rh_G_temporal_inf            | 0.055  | -0.011, 0.121  | 1.66  | 0.101        | 0.912 |
| rh_G_temporal_middle         | -0.005 | -0.046, 0.036  | -0.24 | 0.810        | 0.994 |
| rh_Lat_Fis.ant.Horizontal    | -0.035 | -0.087, 0.016  | -1.35 | 0.179        | 0.936 |
| rh_Lat_Fis.ant.Vertical      | 0.003  | -0.07, 0.076   | 0.08  | 0.937        | 0.999 |
| rh_Lat_Fis.post              | -0.037 | -0.084, 0.01   | -1.56 | 0.122        | 0.912 |
| rh_Pole_occipital            | -0.026 | -0.105, 0.053  | -0.65 | 0.517        | 0.994 |
| rh_Pole_temporal             | -0.016 | -0.08, 0.048   | -0.50 | 0.618        | 0.994 |
| rh_S_calcarine               | -0.025 | -0.088, 0.039  | -0.78 | 0.440        | 0.994 |
| rh_S_central                 | -0.026 | -0.072, 0.02   | -1.13 | 0.262        | 0.994 |
| rh_S_cingul.Marginalis       | 0.003  | -0.032, 0.037  | 0.15  | 0.879        | 0.997 |
| rh_S_circular_insula_ant     | -0.019 | -0.067, 0.03   | -0.77 | 0.443        | 0.994 |
| rh_S_circular_insula_inf     | -0.028 | -0.065, 0.008  | -1.56 | 0.123        | 0.912 |
| rh_S_circular_insula_sup     | 0.009  | -0.028, 0.046  | 0.49  | 0.626        | 0.994 |
| rh_S_collat_transv_ant       | -0.010 | -0.078, 0.057  | -0.31 | 0.761        | 0.994 |
| rh_S_collat_transv_post      | -0.005 | -0.06, 0.051   | -0.17 | 0.869        | 0.994 |
| rh_S_front_inf               | -0.011 | -0.06, 0.037   | -0.45 | 0.652        | 0.994 |
| rh_S_front_middle            | -0.030 | -0.085, 0.024  | -1.11 | 0.272        | 0.994 |
| rh_S_front_sup               | 0.006  | -0.035, 0.046  | 0.28  | 0.782        | 0.994 |
| rh_S_interm_prim.Jensen      | 0.000  | -0.056, 0.057  | 0.02  | 0.987        | 0.999 |
| rh_S_intrapariet_and_P_trans | 0.031  | -0.018, 0.08   | 1.27  | 0.206        | 0.994 |
| rh_S_oc_middle_and_Lunatus   | -0.050 | -0.104, 0.003  | -1.87 | 0.064        | 0.912 |
| rh_S_oc_sup_and_transversal  | -0.037 | -0.079, 0.004  | -1.78 | 0.079        | 0.912 |
| rh_S_occipital_ant           | -0.044 | -0.089, 0.002  | -1.89 | 0.062        | 0.912 |
| rh_S_oc.temp_lat             | -0.066 | -0.112, -0.02  | -2.86 | <b>0.005</b> | 0.439 |
| rh_S_oc.temp_med_and_Lingual | -0.018 | -0.061, 0.025  | -0.82 | 0.416        | 0.994 |
| rh_S_orbital_lateral         | -0.049 | -0.112, 0.014  | -1.55 | 0.124        | 0.912 |
| rh_S_orbital_med.olfact      | -0.037 | -0.17, 0.096   | -0.55 | 0.583        | 0.994 |
| rh_S_orbital.H_Shaped        | 0.035  | -0.027, 0.098  | 1.12  | 0.266        | 0.994 |
| rh_S_parieto_occipital       | -0.006 | -0.047, 0.036  | -0.26 | 0.793        | 0.994 |

**eTable 28. Differences in functional activity between the never-suicidal group and the concordantly-reported suicidality group for correct stops: Welch's t-test**

| <b>ROIs</b>              | <b>Mean</b> | <b>95%CI</b>  | <b>t</b> | <b>p (unc)</b> | <b>p FDR</b> |
|--------------------------|-------------|---------------|----------|----------------|--------------|
| rh_S_pericallosal        | -0.017      | -0.068, 0.033 | -0.69    | 0.493          | 0.994        |
| rh_S_postcentral         | -0.004      | -0.04, 0.032  | -0.23    | 0.819          | 0.994        |
| rh_S_precentral.inf.part | 0.011       | -0.038, 0.06  | 0.45     | 0.655          | 0.994        |
| rh_S_precentral.sup.part | 0.014       | -0.024, 0.053 | 0.74     | 0.459          | 0.994        |
| rh_S_suborbital          | -0.033      | -0.185, 0.119 | -0.43    | 0.668          | 0.994        |
| rh_S_subparietal         | -0.024      | -0.076, 0.028 | -0.91    | 0.366          | 0.994        |
| rh_S_temporal_inf        | -0.002      | -0.073, 0.069 | -0.06    | 0.955          | 0.999        |
| rh_S_temporal_sup        | -0.031      | -0.064, 0.001 | -1.90    | 0.060          | 0.912        |
| rh_S_temporal_transverse | -0.028      | -0.085, 0.029 | -0.97    | 0.335          | 0.994        |

**Bold** denotes group differences at  $p < 0.05$  uncorrected

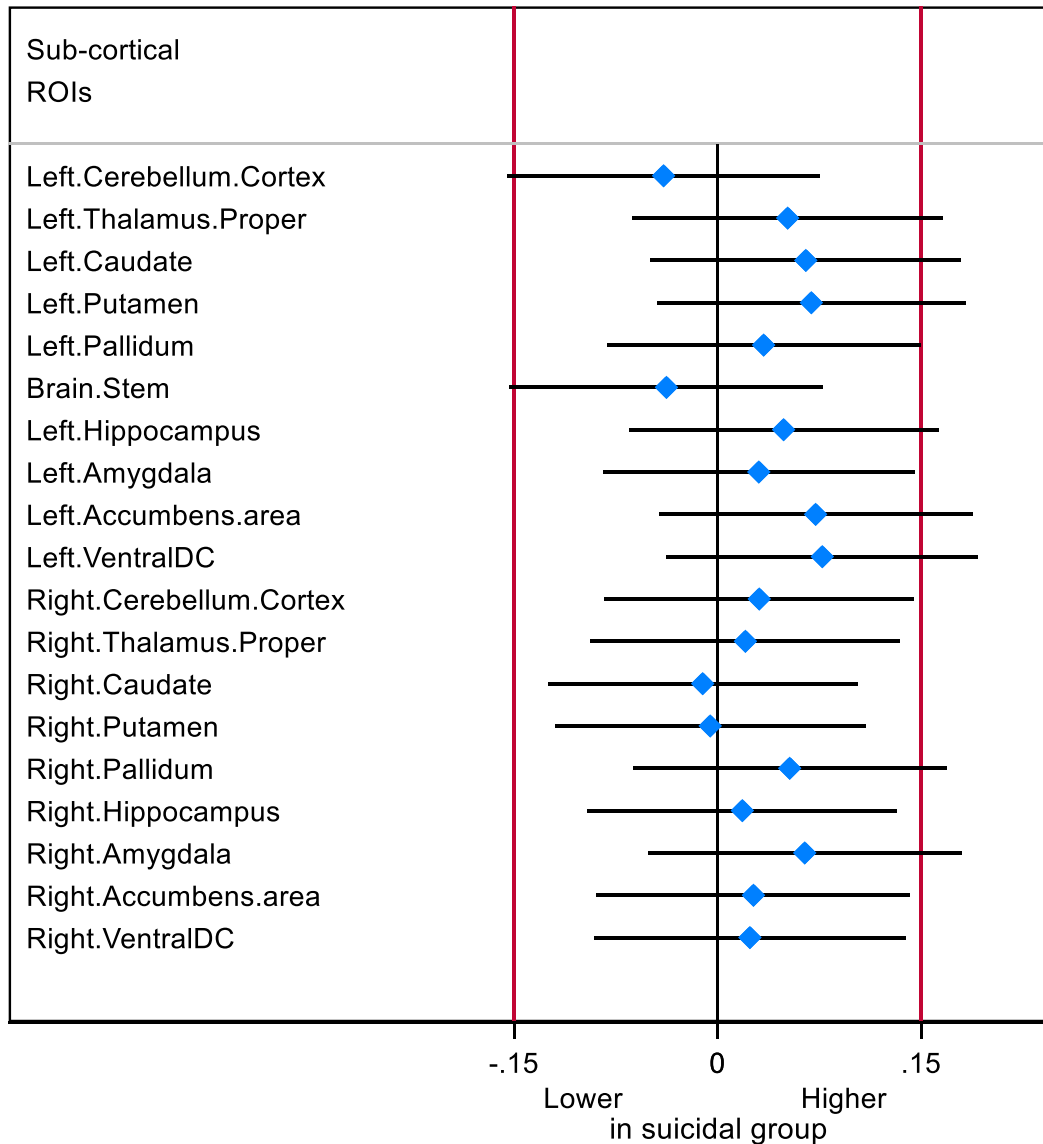

**eFigure 42.** Results of the Equivalence test for differences in functional activity in subcortical regions between the never-suicidal group and the child-reported suicidality group for correct stops. The figure shows the effect sizes and 95% confidence intervals of the difference against the interval of equivalence (-0.15 to 0.15).

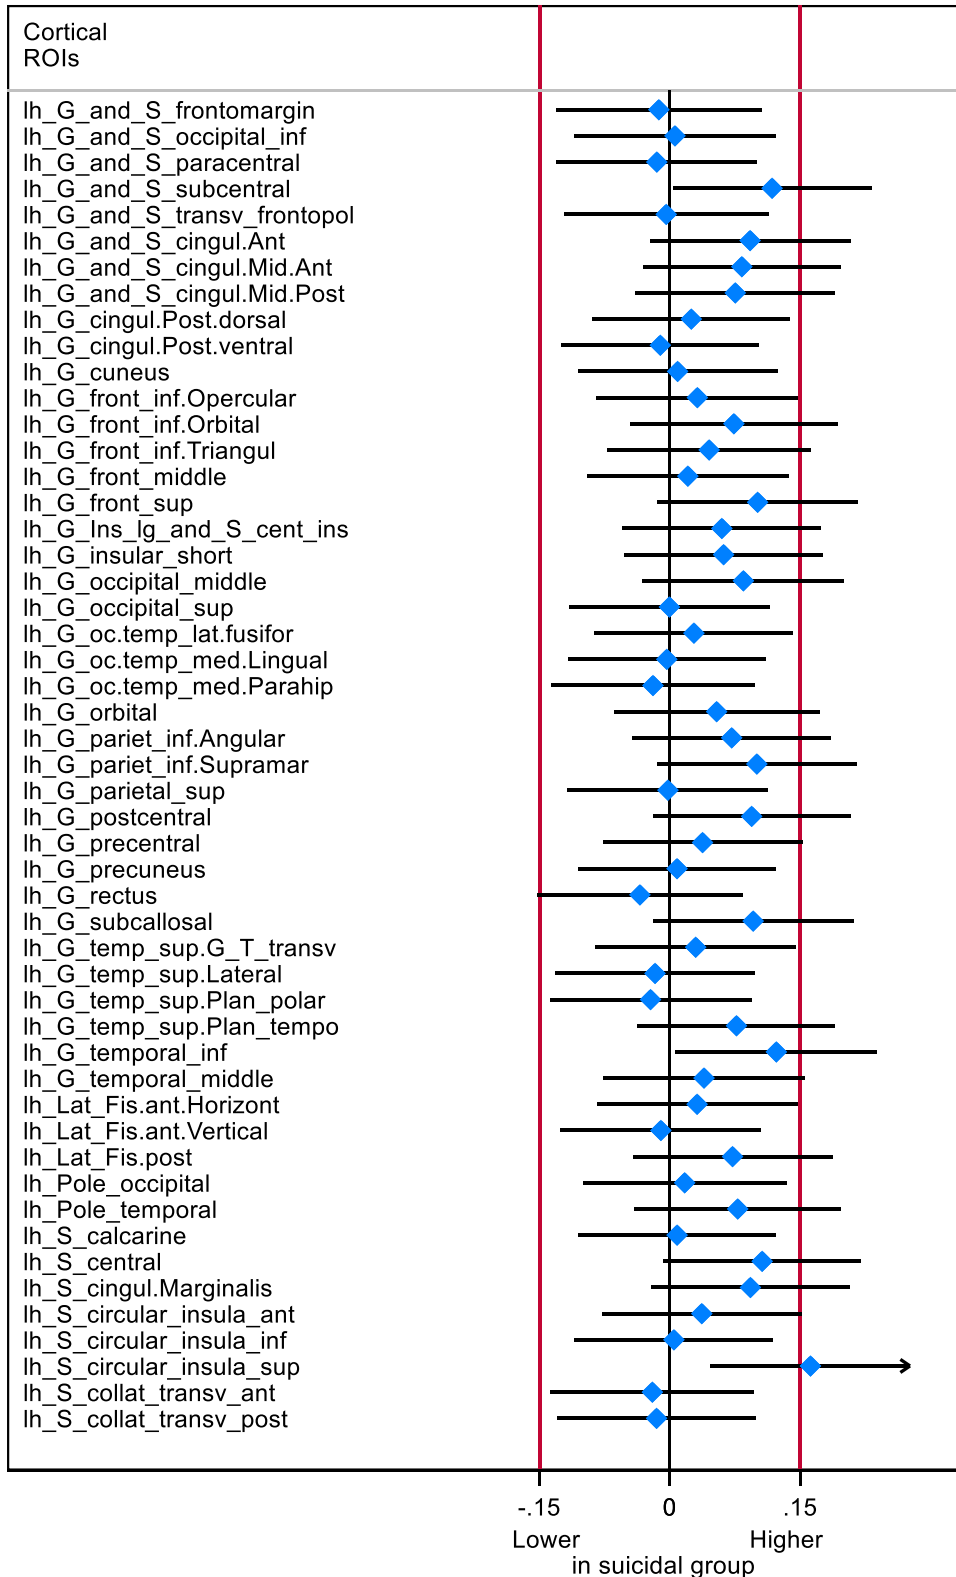

**eFigure 43 (1 of 3).** Results of the Equivalence test for differences in functional activity in cortical regions between the never-suicidal group and the child-reported suicidality group for correct stops. The figure shows the effect sizes and 95% confidence intervals of the difference against the interval of equivalence (-0.15 to 0.15).

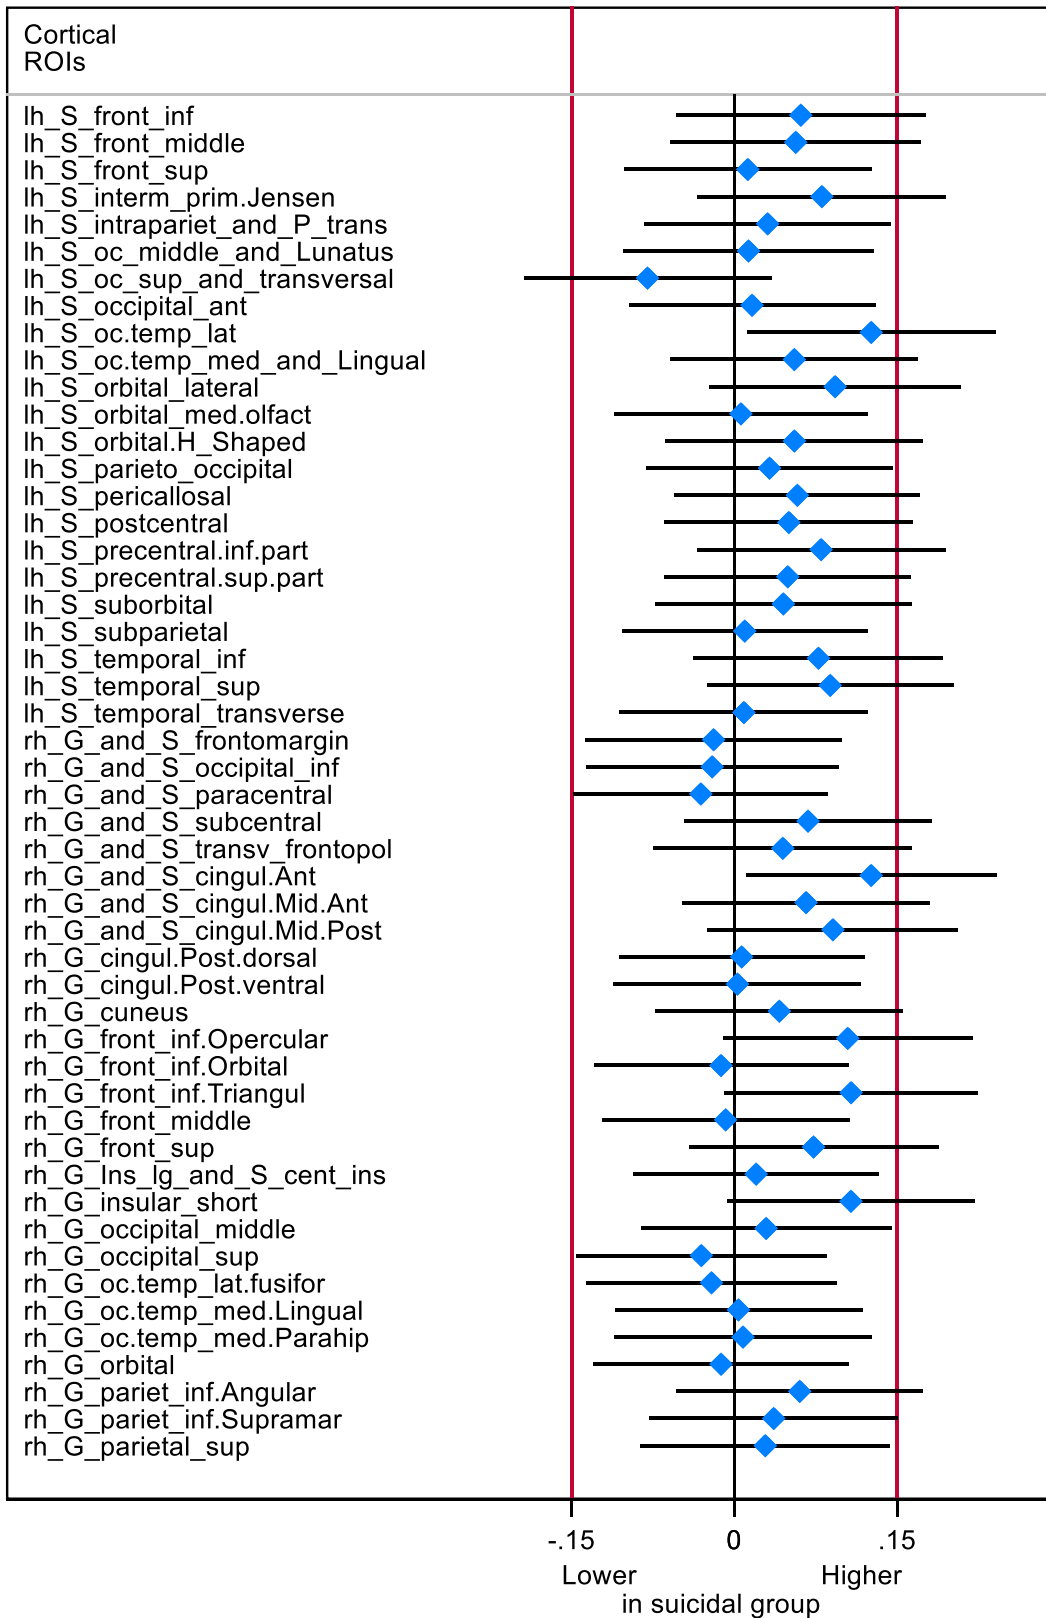

**eFigure 43 (2 of 3).** Results of the Equivalence test for differences in functional activity in cortical regions between the never-suicidal group and the child-reported suicidality group for correct stops. The figure shows the effect sizes and 95% confidence intervals of the difference against the interval of equivalence (-0.15 to 0.15).

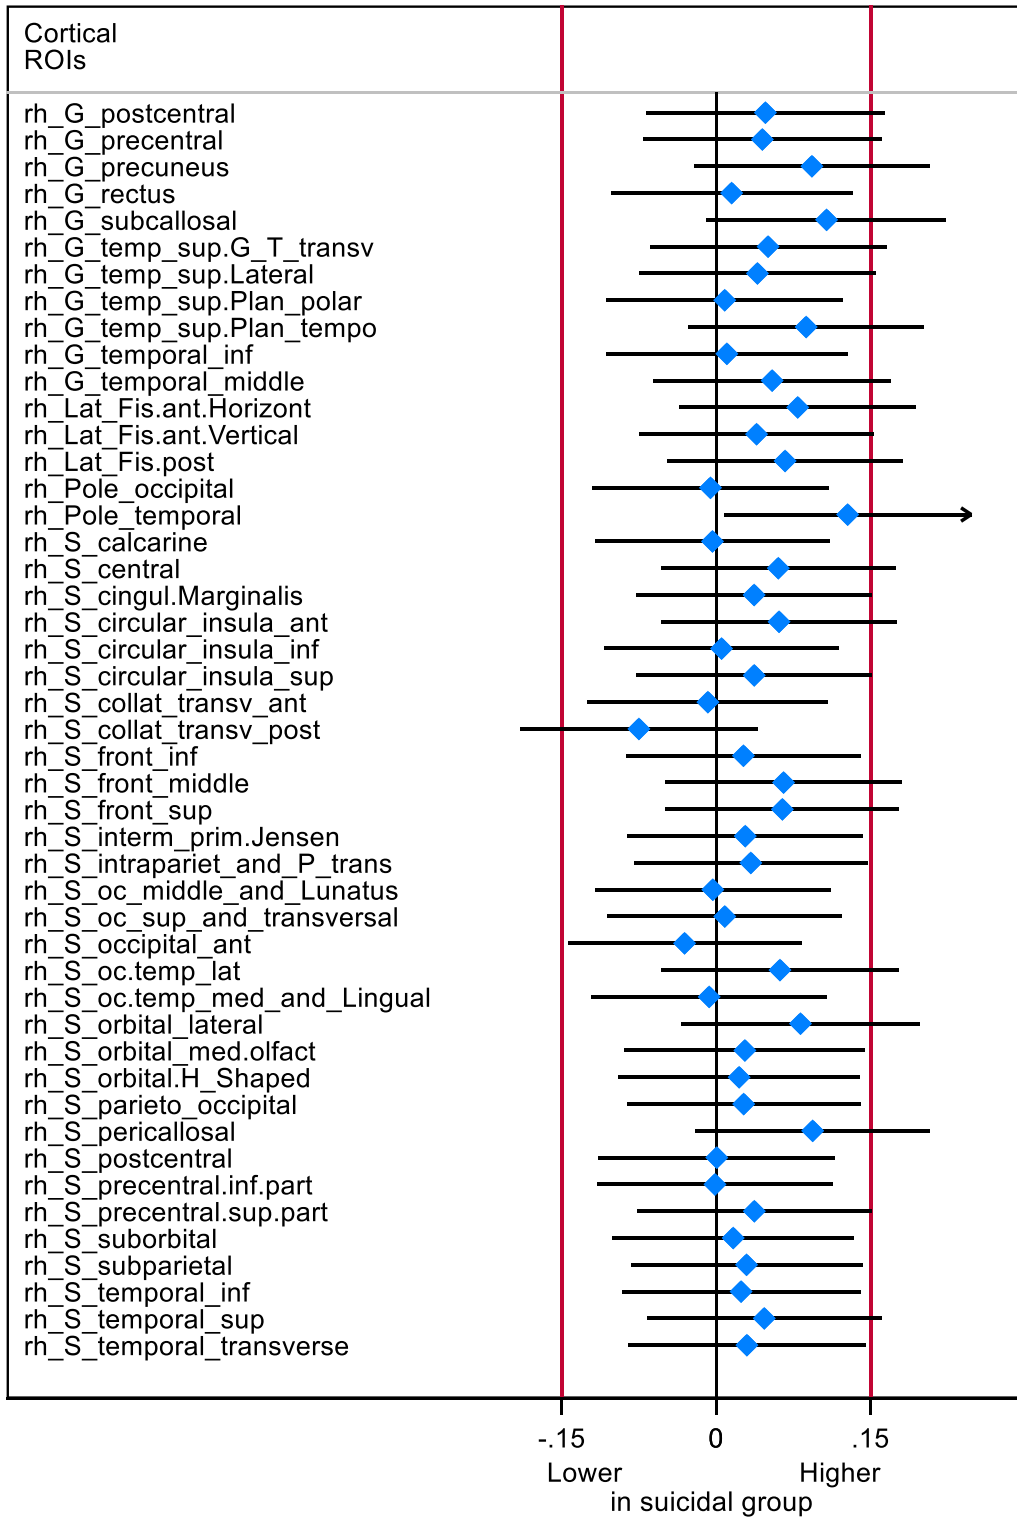

**eFigure 43 (3 of 3).** Results of the Equivalence test for differences in functional activity in cortical regions between the never-suicidal group and the child-reported suicidality group for correct stops. The figure shows the effect sizes and 95% confidence intervals of the difference against the interval of equivalence (-0.15 to 0.15).



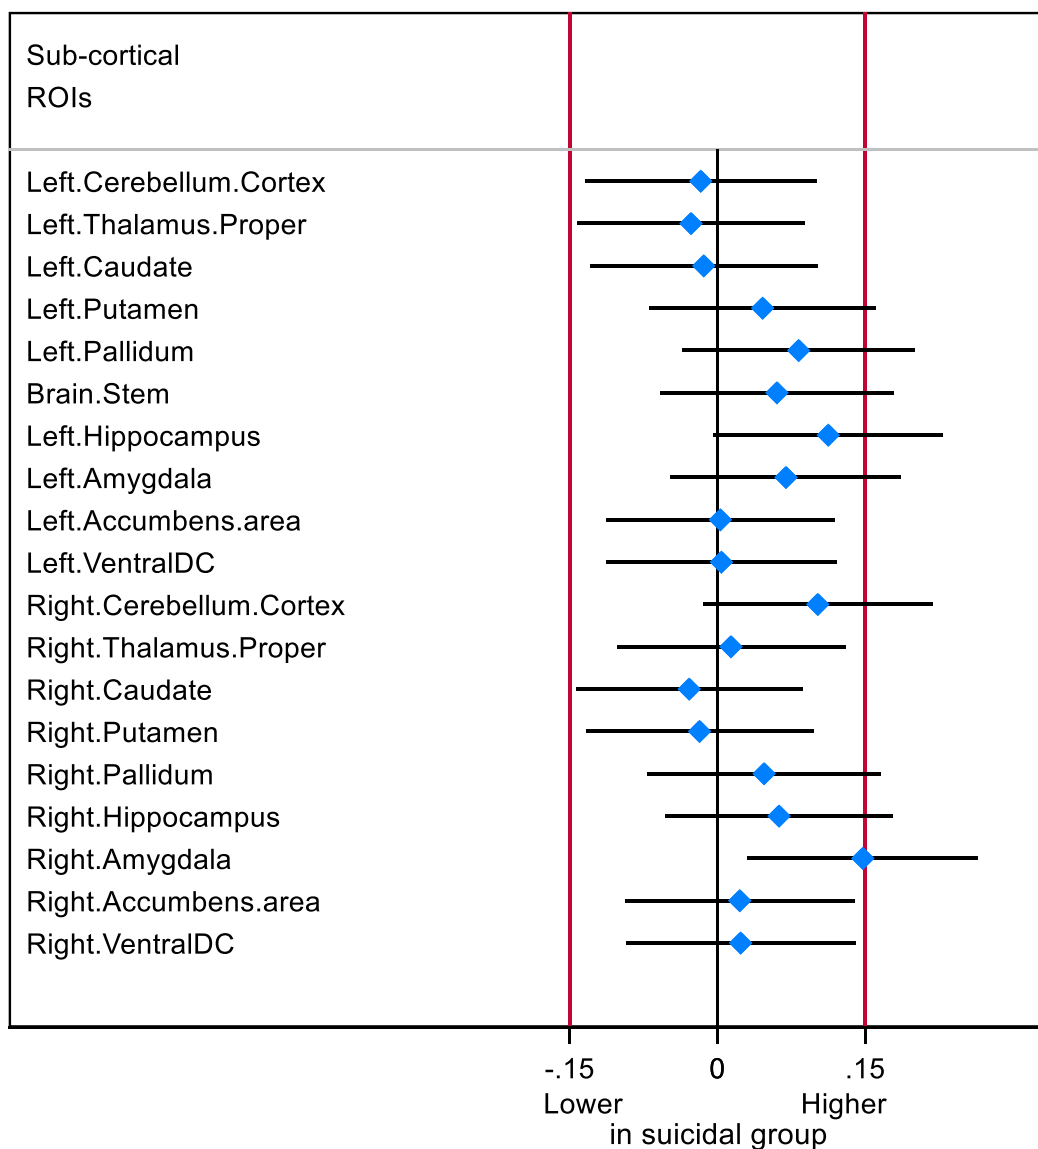

**eFigure 44.** Results of the Equivalence test for differences in functional activity in subcortical regions between the never-suicidal group and the caregiver-reported suicidality group for correct stops. The figure shows the effect sizes and 95% confidence intervals of the difference against the interval of equivalence (-0.15 to 0.15).

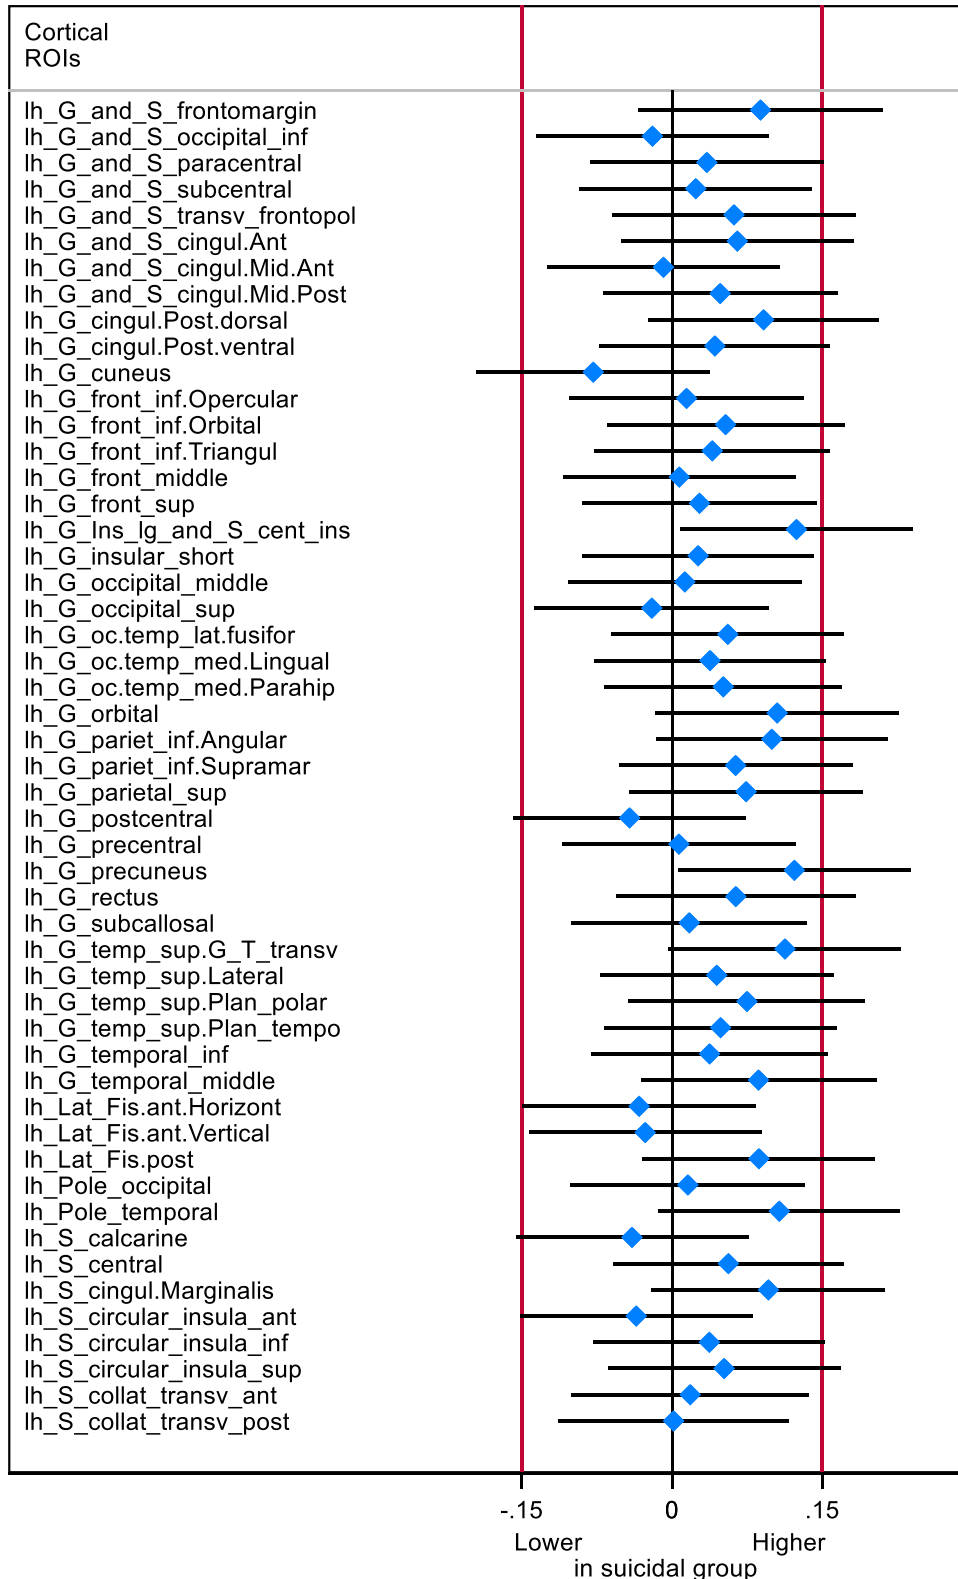

**eFigure 45 (1 of 3).** Results of the Equivalence test for differences in functional activity in cortical regions between the never-suicidal group and the caregiver-reported suicidality group for correct stops. The figure shows the effect sizes and 95% confidence intervals of the difference against the interval of equivalence (-0.15 to 0.15).

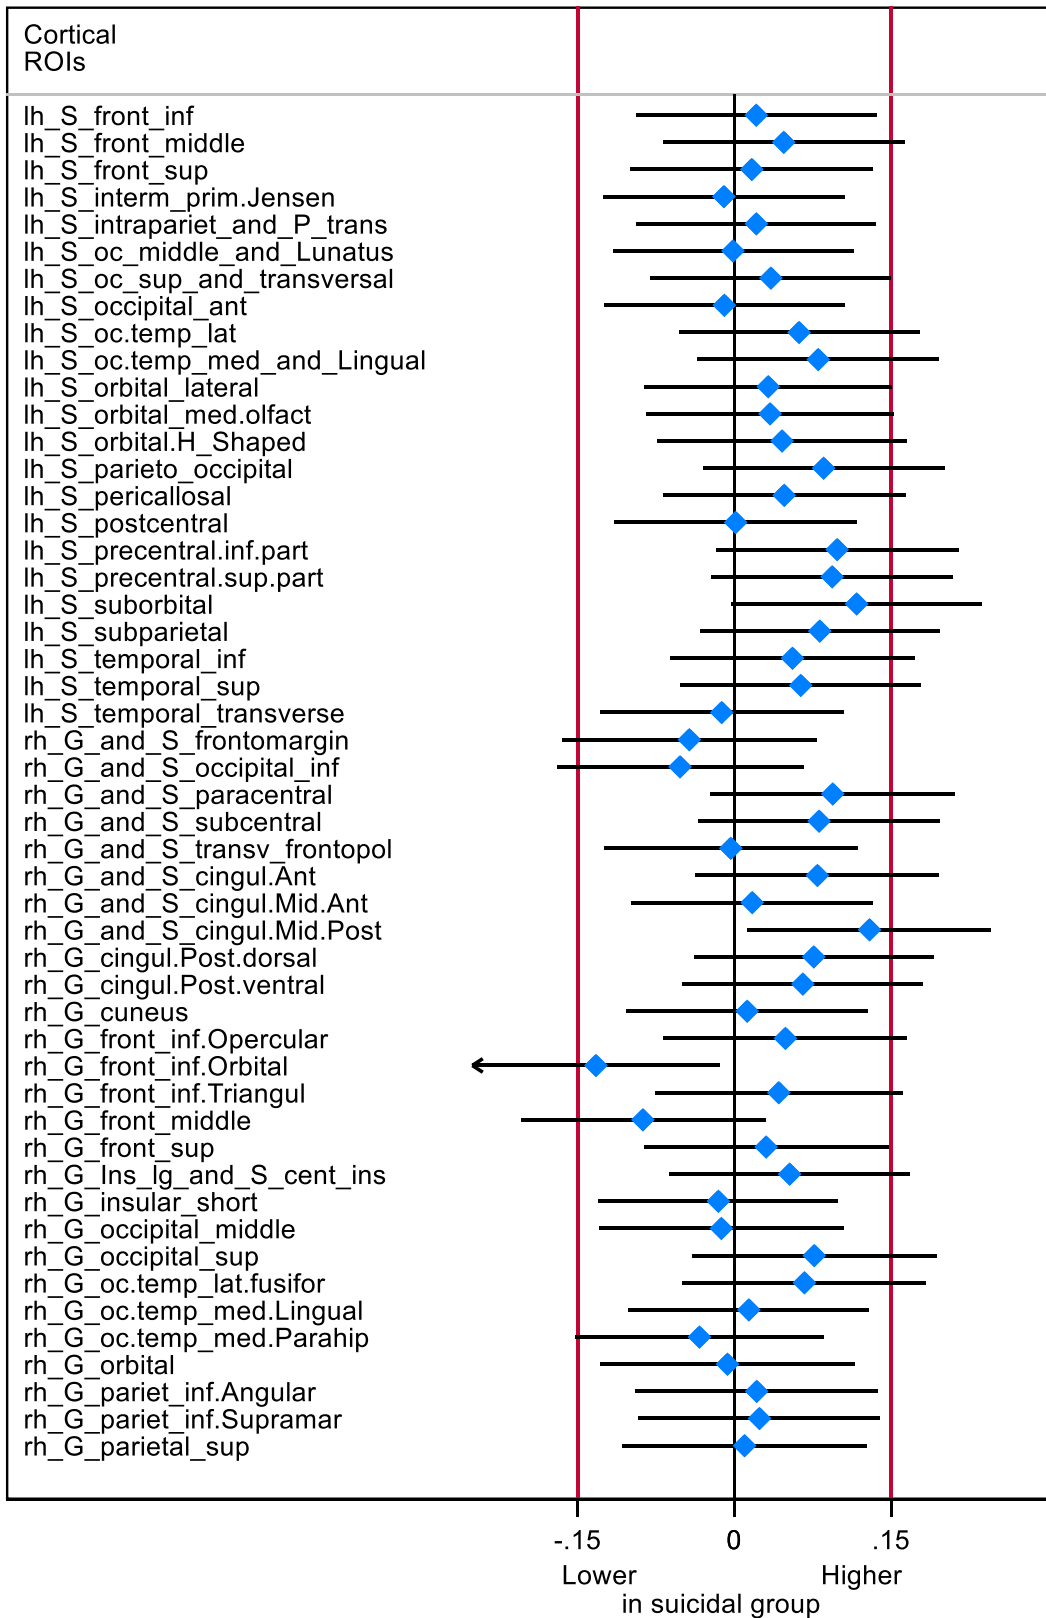

**eFigure 45 (2 of 3).** Results of the Equivalence test for differences in functional activity in cortical regions between the never-suicidal group and the caregiver-reported suicidality group for correct stops. The figure shows the effect sizes and 95% confidence intervals of the difference against the interval of equivalence (-0.15 to 0.15).

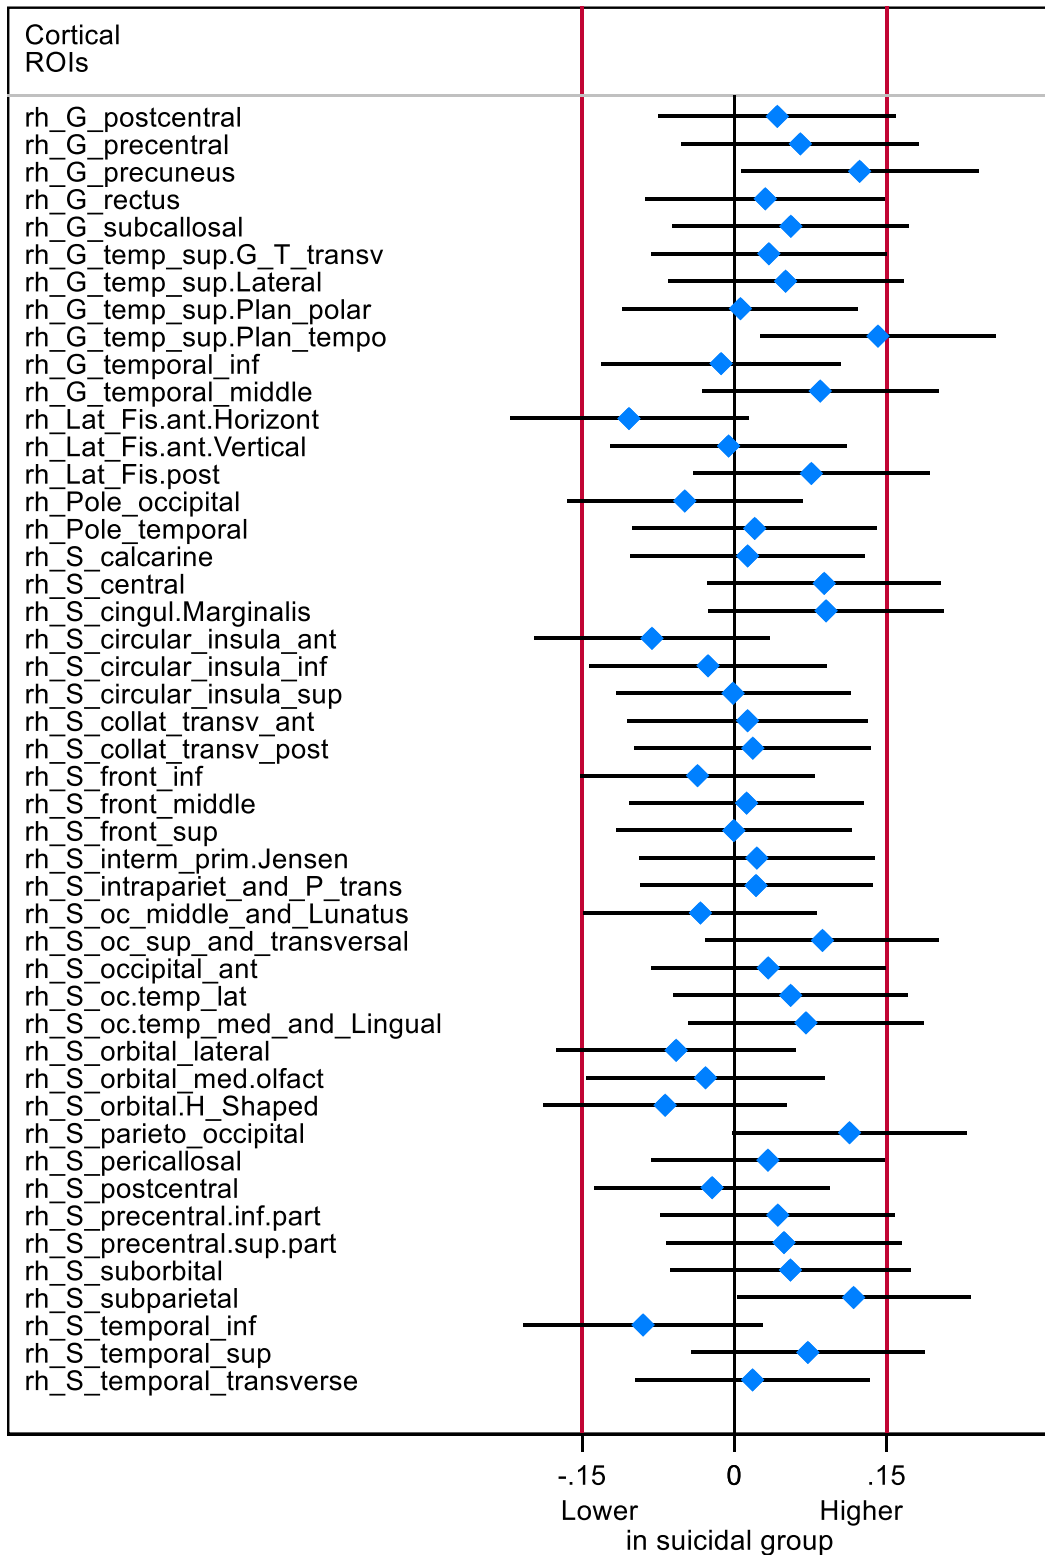

**eFigure 45 (3 of 3).** Results of the Equivalence test for differences in functional activity in cortical regions between the never-suicidal group and the caregiver-reported suicidality group for correct stops. The figure shows the effect sizes and 95% confidence intervals of the difference against the interval of equivalence (-0.15 to 0.15).

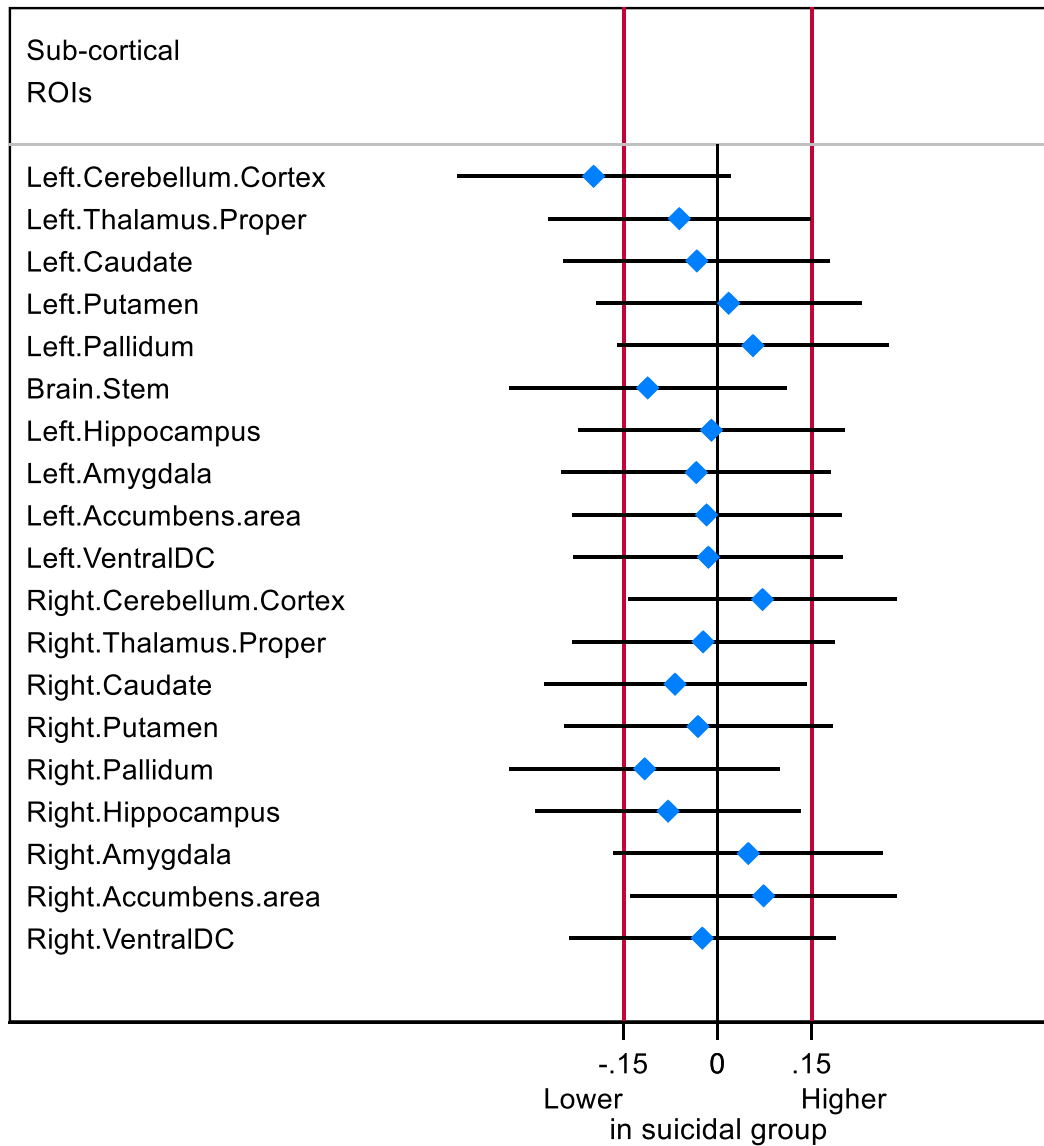

**eFigure 46.** Results of the Equivalence test for differences in functional activity in subcortical regions between the never-suicidal group and the concordantly-reported suicidality group for correct stops. The figure shows the effect sizes and 95% confidence intervals of the difference against the interval of equivalence (-0.15 to 0.15).

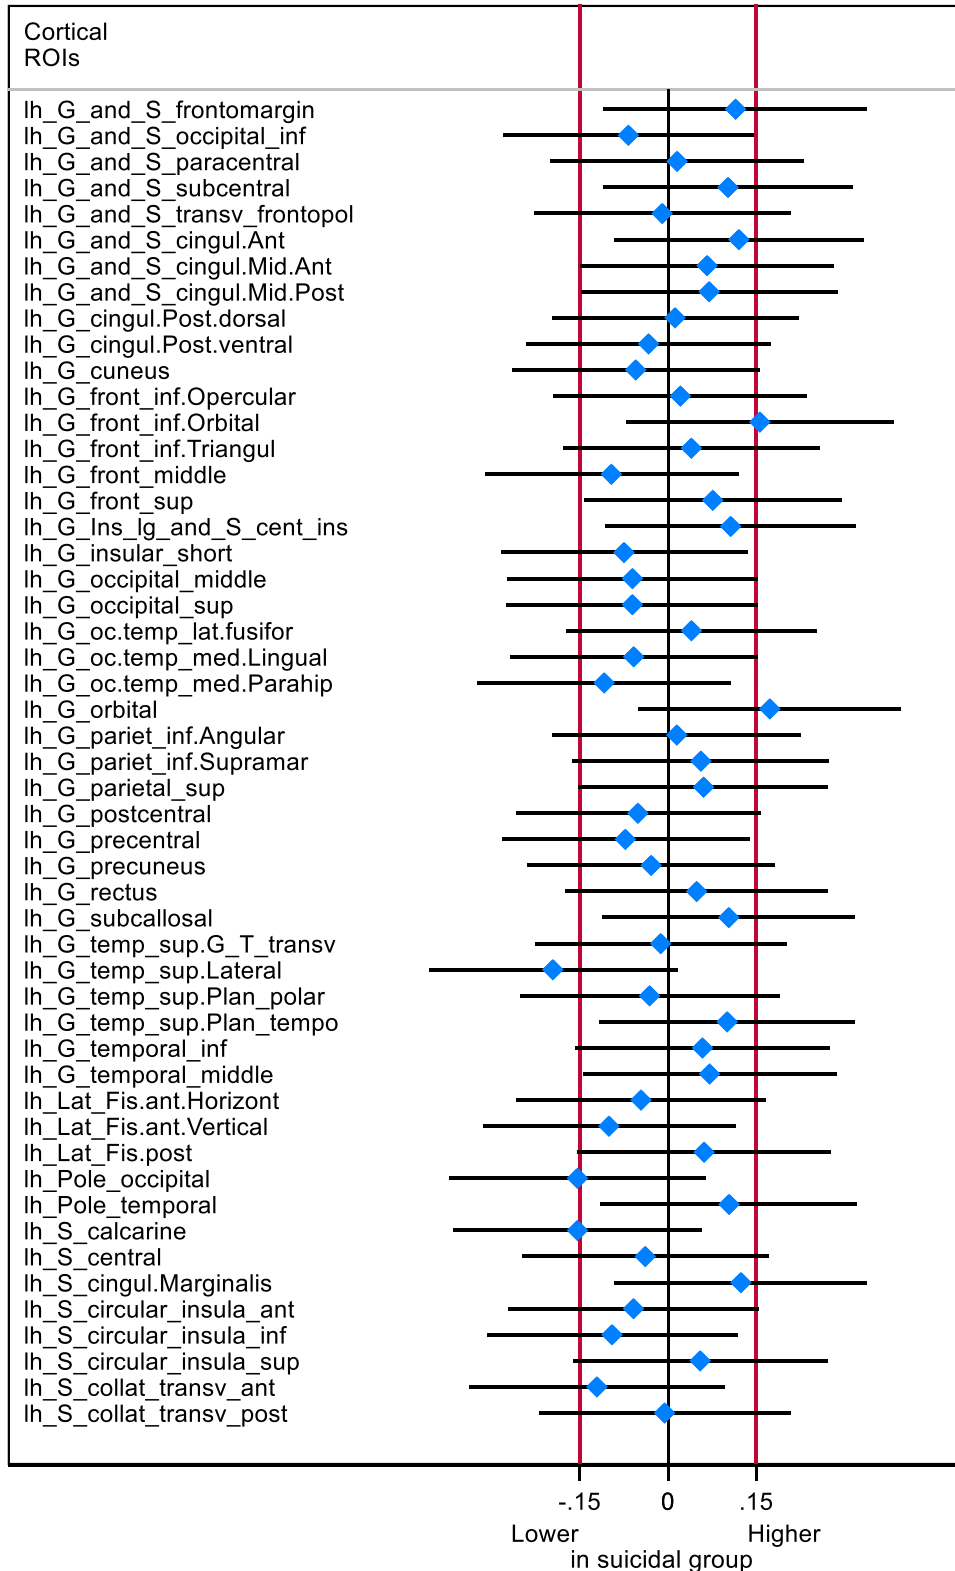

**eFigure 47 (1 of 3).** Results of the Equivalence test for differences in functional activity in cortical regions between the never-suicidal group and the concordantly-reported suicidality group for correct stops. The figure shows the effect sizes and 95% confidence intervals of the difference against the interval of equivalence (-0.15 to 0.15).

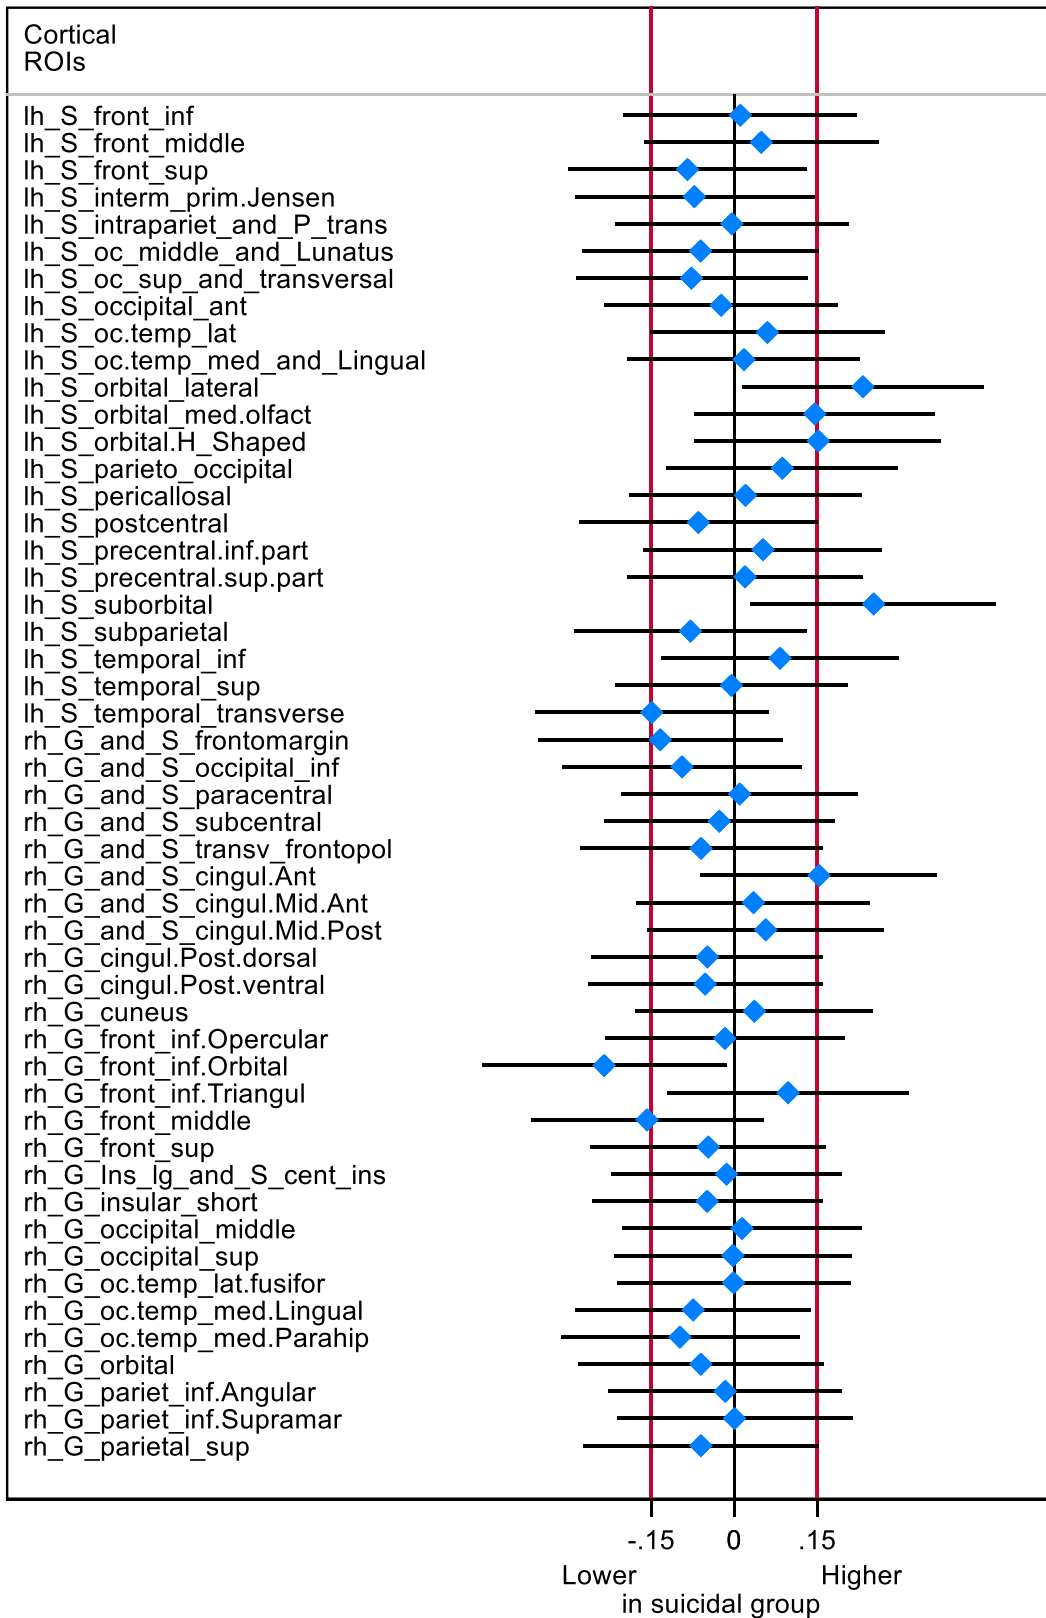

**eFigure 47 (2 of 3).** Results of the Equivalence test for differences in functional activity in cortical regions between the never-suicidal group and the concordantly-reported suicidality group for correct stops. The figure shows the effect sizes and 95% confidence intervals of the difference against the interval of equivalence (-0.15 to 0.15).

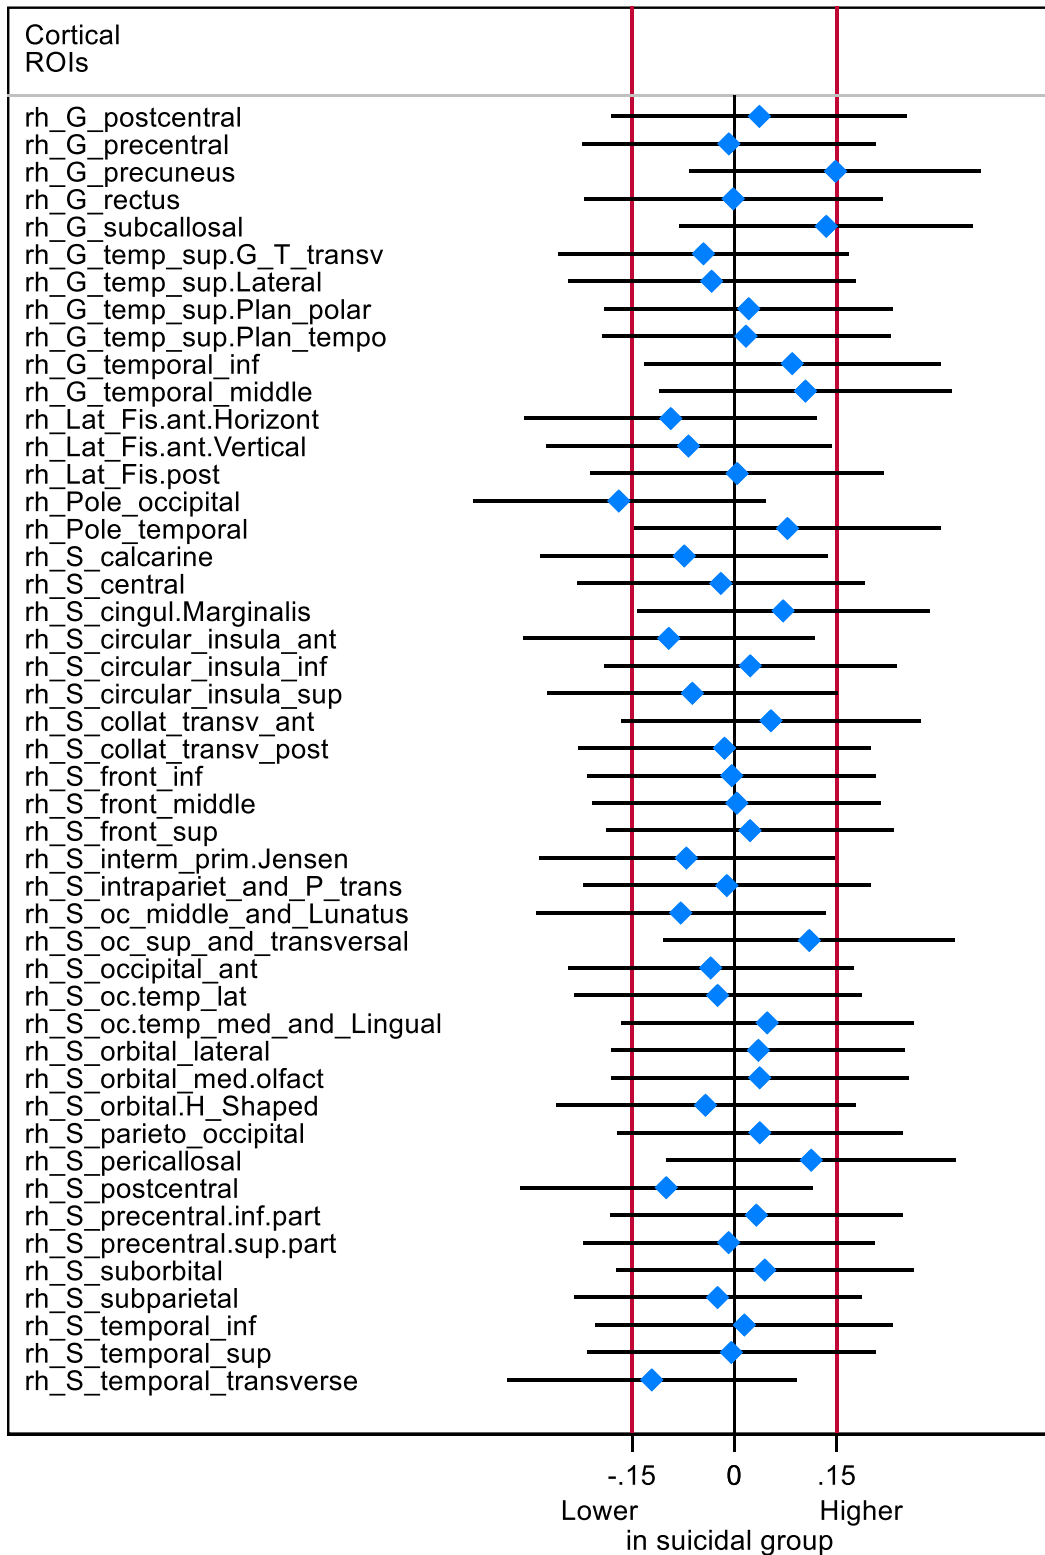

**eFigure 47 (3 of 3).** Results of the Equivalence test for differences in functional activity in cortical regions between the never-suicidal group and the concordantly-reported suicidality group for correct stops. The figure shows the effect sizes and 95% confidence intervals of the difference against the interval of equivalence (-0.15 to 0.15).



## Emotional n-back

### 2-back vs 0-back

| <b>eTable 29. Differences in functional activity between the never-suicidal group and the child-reported suicidality group for 2-back vs 0-back: Welch's t-test</b> |             |               |          |                |              |
|---------------------------------------------------------------------------------------------------------------------------------------------------------------------|-------------|---------------|----------|----------------|--------------|
| <b>ROIs</b>                                                                                                                                                         | <b>Mean</b> | <b>95%CI</b>  | <b>t</b> | <b>p (unc)</b> | <b>p FDR</b> |
| <b>Subcortical regions</b>                                                                                                                                          |             |               |          |                |              |
| Left.Cerebellum.Cortex                                                                                                                                              | 0.000       | -0.031, 0.032 | 0.01     | 0.996          | 0.996        |
| Left.Thalamus.Proper                                                                                                                                                | 0.005       | -0.012, 0.021 | 0.55     | 0.581          | 0.928        |
| Left.Caudate                                                                                                                                                        | -0.005      | -0.028, 0.017 | -0.48    | 0.633          | 0.928        |
| Left.Putamen                                                                                                                                                        | -0.010      | -0.03, 0.009  | -1.05    | 0.296          | 0.925        |
| Left.Pallidum                                                                                                                                                       | -0.003      | -0.021, 0.014 | -0.38    | 0.703          | 0.944        |
| Brain.Stem                                                                                                                                                          | 0.002       | -0.018, 0.022 | 0.21     | 0.830          | 0.968        |
| Left.Hippocampus                                                                                                                                                    | -0.006      | -0.026, 0.013 | -0.65    | 0.517          | 0.928        |
| Left.Amygdala                                                                                                                                                       | 0.009       | -0.014, 0.032 | 0.78     | 0.437          | 0.925        |
| Left.Accumbens.area                                                                                                                                                 | -0.002      | -0.028, 0.024 | -0.14    | 0.885          | 0.969        |
| Left.VentralDC                                                                                                                                                      | -0.007      | -0.027, 0.012 | -0.77    | 0.444          | 0.925        |
| Right.Cerebellum.Cortex                                                                                                                                             | -0.002      | -0.031, 0.026 | -0.16    | 0.870          | 0.969        |
| Right.Thalamus.Proper                                                                                                                                               | -0.005      | -0.023, 0.013 | -0.57    | 0.570          | 0.928        |
| Right.Caudate                                                                                                                                                       | -0.017      | -0.042, 0.007 | -1.38    | 0.169          | 0.925        |
| Right.Putamen                                                                                                                                                       | -0.012      | -0.033, 0.008 | -1.20    | 0.231          | 0.925        |
| Right.Pallidum                                                                                                                                                      | -0.009      | -0.026, 0.007 | -1.12    | 0.264          | 0.925        |
| Right.Hippocampus                                                                                                                                                   | -0.005      | -0.024, 0.014 | -0.51    | 0.607          | 0.928        |
| Right.Amygdala                                                                                                                                                      | 0.001       | -0.022, 0.025 | 0.12     | 0.907          | 0.969        |
| Right.Accumbens.area                                                                                                                                                | 0.007       | -0.019, 0.033 | 0.52     | 0.604          | 0.928        |
| Right.VentralDC                                                                                                                                                     | -0.004      | -0.024, 0.017 | -0.37    | 0.711          | 0.944        |
| <b>Cortical regions</b>                                                                                                                                             |             |               |          |                |              |
| lh_G_and_S_frontomargin                                                                                                                                             | -0.016      | -0.061, 0.03  | -0.68    | 0.495          | 0.928        |
| lh_G_and_S_occipital_inf                                                                                                                                            | -0.020      | -0.058, 0.017 | -1.08    | 0.281          | 0.925        |
| lh_G_and_S_paracentral                                                                                                                                              | -0.006      | -0.027, 0.016 | -0.49    | 0.622          | 0.928        |
| lh_G_and_S_subcentral                                                                                                                                               | -0.012      | -0.037, 0.012 | -0.98    | 0.328          | 0.925        |
| lh_G_and_S_transv_frontopol                                                                                                                                         | -0.011      | -0.056, 0.035 | -0.46    | 0.647          | 0.937        |
| lh_G_and_S_cingul.Ant                                                                                                                                               | -0.010      | -0.032, 0.013 | -0.85    | 0.393          | 0.925        |
| lh_G_and_S_cingul.Mid.Ant                                                                                                                                           | -0.008      | -0.029, 0.013 | -0.76    | 0.446          | 0.925        |
| lh_G_and_S_cingul.Mid.Post                                                                                                                                          | -0.003      | -0.021, 0.016 | -0.27    | 0.784          | 0.968        |
| lh_G_cingul.Post.dorsal                                                                                                                                             | -0.001      | -0.023, 0.021 | -0.09    | 0.926          | 0.969        |
| lh_G_cingul.Post.ventral                                                                                                                                            | -0.024      | -0.068, 0.021 | -1.06    | 0.292          | 0.925        |
| lh_G_cuneus                                                                                                                                                         | -0.021      | -0.054, 0.012 | -1.24    | 0.215          | 0.925        |
| lh_G_front_inf.Opercular                                                                                                                                            | 0.003       | -0.019, 0.025 | 0.28     | 0.779          | 0.968        |
| lh_G_front_inf.Orbital                                                                                                                                              | 0.016       | -0.018, 0.05  | 0.94     | 0.348          | 0.925        |
| lh_G_front_inf.Triangul                                                                                                                                             | 0.006       | -0.022, 0.035 | 0.43     | 0.671          | 0.942        |
| lh_G_front_middle                                                                                                                                                   | -0.013      | -0.038, 0.012 | -1.03    | 0.302          | 0.925        |
| lh_G_front_sup                                                                                                                                                      | -0.009      | -0.025, 0.007 | -1.12    | 0.263          | 0.925        |
| lh_G_Ins_lg_and_S_cent_ins                                                                                                                                          | -0.004      | -0.026, 0.018 | -0.33    | 0.743          | 0.948        |

**eTable 29. Differences in functional activity between the never-suicidal group and the child-reported suicidality group for 2-back vs 0-back: Welch's t-test**

| ROIs                         | Mean   | 95%CI          | t     | p (unc)      | p FDR |
|------------------------------|--------|----------------|-------|--------------|-------|
| lh_G_insular_short           | -0.002 | -0.02, 0.016   | -0.18 | 0.855        | 0.968 |
| lh_G_occipital_middle        | -0.024 | -0.048, 0      | -1.98 | <b>0.048</b> | 0.925 |
| lh_G_occipital_sup           | -0.008 | -0.035, 0.019  | -0.58 | 0.562        | 0.928 |
| lh_G_oc.temp_lat.fusifor     | 0.000  | -0.029, 0.028  | -0.02 | 0.981        | 0.996 |
| lh_G_oc.temp_med.Lingual     | -0.039 | -0.077, 0      | -1.98 | <b>0.048</b> | 0.925 |
| lh_G_oc.temp_med.Parahip     | -0.006 | -0.034, 0.021  | -0.45 | 0.651        | 0.937 |
| lh_G_orbital                 | -0.029 | -0.07, 0.011   | -1.44 | 0.152        | 0.925 |
| lh_G_pariet_inf.Angular      | -0.004 | -0.029, 0.021  | -0.34 | 0.735        | 0.948 |
| lh_G_pariet_inf.Supramar     | 0.004  | -0.015, 0.024  | 0.43  | 0.670        | 0.942 |
| lh_G_parietal_sup            | -0.023 | -0.044, -0.001 | -2.09 | <b>0.037</b> | 0.925 |
| lh_G_postcentral             | 0.003  | -0.021, 0.026  | 0.22  | 0.827        | 0.968 |
| lh_G_precentral              | 0.001  | -0.014, 0.017  | 0.18  | 0.858        | 0.968 |
| lh_G_precuneus               | -0.010 | -0.032, 0.012  | -0.92 | 0.356        | 0.925 |
| lh_G_rectus                  | -0.033 | -0.114, 0.049  | -0.79 | 0.433        | 0.925 |
| lh_G_subcallosal             | -0.015 | -0.056, 0.025  | -0.74 | 0.458        | 0.925 |
| lh_G_temp_sup.G_T_transv     | -0.013 | -0.036, 0.009  | -1.15 | 0.251        | 0.925 |
| lh_G_temp_sup.Lateral        | -0.007 | -0.026, 0.013  | -0.68 | 0.498        | 0.928 |
| lh_G_temp_sup.Plan_polar     | -0.010 | -0.028, 0.007  | -1.13 | 0.259        | 0.925 |
| lh_G_temp_sup.Plan_tempo     | 0.000  | -0.022, 0.022  | 0.01  | 0.996        | 0.996 |
| lh_G_temporal_inf            | 0.009  | -0.027, 0.045  | 0.49  | 0.623        | 0.928 |
| lh_G_temporal_middle         | 0.012  | -0.012, 0.036  | 0.98  | 0.327        | 0.925 |
| lh_Lat_Fis.ant.Horizontal    | -0.011 | -0.042, 0.02   | -0.72 | 0.473        | 0.925 |
| lh_Lat_Fis.ant.Vertical      | 0.006  | -0.028, 0.041  | 0.36  | 0.718        | 0.944 |
| lh_Lat_Fis.post              | 0.007  | -0.017, 0.031  | 0.58  | 0.563        | 0.928 |
| lh_Pole_occipital            | -0.033 | -0.076, 0.009  | -1.54 | 0.125        | 0.925 |
| lh_Pole_temporal             | -0.002 | -0.034, 0.029  | -0.13 | 0.897        | 0.969 |
| lh_S_calcarine               | -0.030 | -0.063, 0.002  | -1.85 | 0.065        | 0.925 |
| lh_S_central                 | 0.000  | -0.023, 0.024  | 0.02  | 0.980        | 0.996 |
| lh_S_cingul.Marginalis       | 0.005  | -0.015, 0.024  | 0.49  | 0.623        | 0.928 |
| lh_S_circular_insula_ant     | -0.010 | -0.037, 0.017  | -0.73 | 0.466        | 0.925 |
| lh_S_circular_insula_inf     | 0.003  | -0.016, 0.022  | 0.28  | 0.780        | 0.968 |
| lh_S_circular_insula_sup     | -0.001 | -0.021, 0.019  | -0.10 | 0.918        | 0.969 |
| lh_S_collat_transv_ant       | 0.013  | -0.025, 0.05   | 0.66  | 0.509        | 0.928 |
| lh_S_collat_transv_post      | 0.004  | -0.03, 0.037   | 0.21  | 0.834        | 0.968 |
| lh_S_front_inf               | -0.013 | -0.041, 0.016  | -0.88 | 0.381        | 0.925 |
| lh_S_front_middle            | -0.023 | -0.051, 0.006  | -1.57 | 0.117        | 0.925 |
| lh_S_front_sup               | -0.005 | -0.026, 0.015  | -0.52 | 0.607        | 0.928 |
| lh_S_interm_prim.Jensen      | -0.001 | -0.03, 0.029   | -0.06 | 0.953        | 0.984 |
| lh_S_intrapariet_and_P_trans | -0.017 | -0.042, 0.009  | -1.28 | 0.203        | 0.925 |
| lh_S_oc_middle_and_Lunatus   | -0.021 | -0.053, 0.011  | -1.30 | 0.195        | 0.925 |
| lh_S_oc_sup_and_transversal  | -0.012 | -0.038, 0.014  | -0.89 | 0.377        | 0.925 |
| lh_S_occipital_ant           | -0.017 | -0.04, 0.006   | -1.42 | 0.155        | 0.925 |
| lh_S_oc.temp_lat             | -0.014 | -0.038, 0.01   | -1.16 | 0.248        | 0.925 |

**eTable 29. Differences in functional activity between the never-suicidal group and the child-reported suicidality group for 2-back vs 0-back: Welch's t-test**

| ROIs                         | Mean   | 95%CI          | t     | p (unc)      | p FDR |
|------------------------------|--------|----------------|-------|--------------|-------|
| lh_S_oc.temp_med_and_Lingual | -0.003 | -0.025, 0.019  | -0.26 | 0.796        | 0.968 |
| lh_S_orbital_lateral         | -0.024 | -0.065, 0.018  | -1.13 | 0.259        | 0.925 |
| lh_S_orbital_med.olfact      | -0.009 | -0.074, 0.057  | -0.26 | 0.797        | 0.968 |
| lh_S_orbital.H_Shaped        | -0.009 | -0.041, 0.023  | -0.56 | 0.576        | 0.928 |
| lh_S_parieto_occipital       | -0.007 | -0.03, 0.017   | -0.57 | 0.567        | 0.928 |
| lh_S_pericallosal            | -0.008 | -0.034, 0.018  | -0.62 | 0.535        | 0.928 |
| lh_S_postcentral             | -0.002 | -0.022, 0.017  | -0.25 | 0.805        | 0.968 |
| lh_S_precentral.inf.part     | -0.008 | -0.034, 0.019  | -0.57 | 0.568        | 0.928 |
| lh_S_precentral.sup.part     | -0.012 | -0.033, 0.009  | -1.10 | 0.271        | 0.925 |
| lh_S_suborbital              | -0.027 | -0.081, 0.028  | -0.96 | 0.340        | 0.925 |
| lh_S_subparietal             | -0.011 | -0.038, 0.016  | -0.81 | 0.418        | 0.925 |
| lh_S_temporal_inf            | 0.016  | -0.019, 0.051  | 0.92  | 0.360        | 0.925 |
| lh_S_temporal_sup            | -0.003 | -0.022, 0.015  | -0.34 | 0.737        | 0.948 |
| lh_S_temporal_transverse     | -0.036 | -0.065, -0.007 | -2.43 | <b>0.015</b> | 0.925 |
| rh_G_and_S_frontomargin      | -0.012 | -0.062, 0.037  | -0.49 | 0.627        | 0.928 |
| rh_G_and_S_occipital_inf     | 0.002  | -0.035, 0.039  | 0.09  | 0.928        | 0.969 |
| rh_G_and_S_paracentral       | 0.005  | -0.019, 0.028  | 0.38  | 0.704        | 0.944 |
| rh_G_and_S_subcentral        | -0.018 | -0.043, 0.007  | -1.38 | 0.168        | 0.925 |
| rh_G_and_S_transv_frontopol  | -0.016 | -0.055, 0.024  | -0.78 | 0.438        | 0.925 |
| rh_G_and_S_cingul.Ant        | -0.010 | -0.036, 0.015  | -0.82 | 0.414        | 0.925 |
| rh_G_and_S_cingul.Mid.Ant    | 0.004  | -0.017, 0.024  | 0.36  | 0.716        | 0.944 |
| rh_G_and_S_cingul.Mid.Post   | 0.007  | -0.011, 0.025  | 0.73  | 0.467        | 0.925 |
| rh_G_cingul.Post.dorsal      | -0.003 | -0.023, 0.018  | -0.26 | 0.796        | 0.968 |
| rh_G_cingul.Post.ventral     | -0.020 | -0.056, 0.017  | -1.05 | 0.296        | 0.925 |
| rh_G_cuneus                  | -0.029 | -0.061, 0.003  | -1.81 | 0.071        | 0.925 |
| rh_G_front_inf.Opercular     | -0.002 | -0.024, 0.02   | -0.18 | 0.854        | 0.968 |
| rh_G_front_inf.Orbital       | -0.010 | -0.045, 0.025  | -0.56 | 0.573        | 0.928 |
| rh_G_front_inf.Triangul      | 0.003  | -0.024, 0.03   | 0.22  | 0.822        | 0.968 |
| rh_G_front_middle            | -0.007 | -0.033, 0.02   | -0.50 | 0.620        | 0.928 |
| rh_G_front_sup               | -0.002 | -0.018, 0.015  | -0.19 | 0.847        | 0.968 |
| rh_G_Ins_lg_and_S_cent_ins   | -0.010 | -0.033, 0.012  | -0.91 | 0.362        | 0.925 |
| rh_G_insular_short           | -0.001 | -0.021, 0.018  | -0.10 | 0.918        | 0.969 |
| rh_G_occipital_middle        | -0.013 | -0.037, 0.01   | -1.10 | 0.270        | 0.925 |
| rh_G_occipital_sup           | -0.013 | -0.039, 0.014  | -0.92 | 0.360        | 0.925 |
| rh_G_oc.temp_lat.fusifor     | -0.003 | -0.036, 0.029  | -0.19 | 0.847        | 0.968 |
| rh_G_oc.temp_med.Lingual     | -0.021 | -0.059, 0.016  | -1.11 | 0.267        | 0.925 |
| rh_G_oc.temp_med.Parahip     | -0.015 | -0.044, 0.014  | -1.04 | 0.297        | 0.925 |
| rh_G_orbital                 | -0.042 | -0.082, -0.001 | -2.00 | <b>0.047</b> | 0.925 |
| rh_G_pariet_inf.Angular      | -0.013 | -0.038, 0.013  | -0.96 | 0.336        | 0.925 |
| rh_G_pariet_inf.Supramar     | -0.007 | -0.025, 0.012  | -0.72 | 0.473        | 0.925 |
| rh_G_parietal_sup            | -0.016 | -0.037, 0.005  | -1.52 | 0.130        | 0.925 |
| rh_G_postcentral             | 0.005  | -0.018, 0.028  | 0.44  | 0.662        | 0.942 |
| rh_G_precentral              | 0.008  | -0.009, 0.025  | 0.94  | 0.350        | 0.925 |

**eTable 29. Differences in functional activity between the never-suicidal group and the child-reported suicidality group for 2-back vs 0-back: Welch's t-test**

| ROIs                         | Mean   | 95%CI         | t     | p (unc) | p FDR |
|------------------------------|--------|---------------|-------|---------|-------|
| rh_G_precuneus               | -0.008 | -0.033, 0.016 | -0.69 | 0.492   | 0.928 |
| rh_G_rectus                  | 0.016  | -0.079, 0.111 | 0.33  | 0.743   | 0.948 |
| rh_G_subcallosal             | -0.019 | -0.057, 0.019 | -0.97 | 0.334   | 0.925 |
| rh_G_temp_sup.G_T_transv     | -0.019 | -0.045, 0.006 | -1.49 | 0.136   | 0.925 |
| rh_G_temp_sup.Lateral        | -0.012 | -0.031, 0.007 | -1.22 | 0.222   | 0.925 |
| rh_G_temp_sup.Plan_polar     | -0.011 | -0.031, 0.008 | -1.14 | 0.255   | 0.925 |
| rh_G_temp_sup.Plan_tempo     | -0.015 | -0.038, 0.007 | -1.32 | 0.189   | 0.925 |
| rh_G_temporal_inf            | 0.002  | -0.035, 0.04  | 0.11  | 0.911   | 0.969 |
| rh_G_temporal_middle         | 0.000  | -0.023, 0.022 | -0.01 | 0.990   | 0.996 |
| rh_Lat_Fis.ant.Horizontal    | 0.006  | -0.022, 0.034 | 0.40  | 0.687   | 0.944 |
| rh_Lat_Fis.ant.Vertical      | 0.001  | -0.036, 0.039 | 0.06  | 0.954   | 0.984 |
| rh_Lat_Fis.post              | -0.010 | -0.035, 0.016 | -0.74 | 0.462   | 0.925 |
| rh_Pole_occipital            | -0.026 | -0.068, 0.016 | -1.21 | 0.229   | 0.925 |
| rh_Pole_temporal             | -0.002 | -0.038, 0.035 | -0.09 | 0.925   | 0.969 |
| rh_S_calcarine               | -0.031 | -0.066, 0.003 | -1.80 | 0.072   | 0.925 |
| rh_S_central                 | 0.005  | -0.02, 0.029  | 0.38  | 0.704   | 0.944 |
| rh_S_cingul.Marginalis       | 0.008  | -0.012, 0.027 | 0.76  | 0.450   | 0.925 |
| rh_S_circular_insula_ant     | -0.012 | -0.038, 0.015 | -0.86 | 0.392   | 0.925 |
| rh_S_circular_insula_inf     | -0.007 | -0.029, 0.014 | -0.65 | 0.518   | 0.928 |
| rh_S_circular_insula_sup     | 0.010  | -0.011, 0.03  | 0.93  | 0.353   | 0.925 |
| rh_S_collat_transv_ant       | -0.031 | -0.07, 0.008  | -1.58 | 0.115   | 0.925 |
| rh_S_collat_transv_post      | -0.002 | -0.034, 0.029 | -0.14 | 0.886   | 0.969 |
| rh_S_front_inf               | -0.016 | -0.042, 0.01  | -1.22 | 0.224   | 0.925 |
| rh_S_front_middle            | -0.012 | -0.041, 0.018 | -0.79 | 0.432   | 0.925 |
| rh_S_front_sup               | -0.010 | -0.032, 0.013 | -0.85 | 0.397   | 0.925 |
| rh_S_interm_prim.Jensen      | -0.014 | -0.046, 0.018 | -0.85 | 0.397   | 0.925 |
| rh_S_intrapariet_and_P_trans | -0.001 | -0.026, 0.023 | -0.11 | 0.911   | 0.969 |
| rh_S_oc_middle_and_Lunatus   | -0.023 | -0.055, 0.008 | -1.44 | 0.150   | 0.925 |
| rh_S_oc_sup_and_transversal  | -0.019 | -0.044, 0.007 | -1.46 | 0.146   | 0.925 |
| rh_S_occipital_ant           | -0.018 | -0.043, 0.007 | -1.41 | 0.159   | 0.925 |
| rh_S_oc.temp_lat             | -0.012 | -0.037, 0.014 | -0.90 | 0.367   | 0.925 |
| rh_S_oc.temp_med_and_Lingual | -0.011 | -0.035, 0.013 | -0.90 | 0.366   | 0.925 |
| rh_S_orbital_lateral         | -0.017 | -0.055, 0.02  | -0.90 | 0.367   | 0.925 |
| rh_S_orbital_med.olfact      | -0.007 | -0.075, 0.061 | -0.21 | 0.833   | 0.968 |
| rh_S_orbital.H_Shaped        | 0.008  | -0.023, 0.039 | 0.53  | 0.597   | 0.928 |
| rh_S_parieto_occipital       | -0.007 | -0.031, 0.016 | -0.61 | 0.542   | 0.928 |
| rh_S_pericallosal            | -0.010 | -0.038, 0.018 | -0.71 | 0.476   | 0.925 |
| rh_S_postcentral             | 0.005  | -0.015, 0.025 | 0.51  | 0.607   | 0.928 |
| rh_S_precentral.inf.part     | -0.006 | -0.033, 0.021 | -0.41 | 0.680   | 0.944 |
| rh_S_precentral.sup.part     | 0.005  | -0.016, 0.027 | 0.48  | 0.634   | 0.928 |
| rh_S_suborbital              | -0.048 | -0.122, 0.027 | -1.26 | 0.210   | 0.925 |
| rh_S_subparietal             | -0.011 | -0.036, 0.015 | -0.82 | 0.412   | 0.925 |
| rh_S_temporal_inf            | -0.030 | -0.066, 0.006 | -1.65 | 0.101   | 0.925 |

**eTable 29. Differences in functional activity between the never-suicidal group and the child-reported suicidality group for 2-back vs 0-back: Welch's t-test**

| ROIs                     | Mean   | 95%CI         | t     | p (unc) | p FDR |
|--------------------------|--------|---------------|-------|---------|-------|
| rh_S_temporal_sup        | -0.016 | -0.036, 0.003 | -1.65 | 0.100   | 0.925 |
| rh_S_temporal_transverse | -0.026 | -0.057, 0.005 | -1.65 | 0.100   | 0.925 |

**Bold** denotes group differences at p<0.05 uncorrected

**eTable 30. Differences in functional activity between the never-suicidal group and the caregiver-reported suicidality group for 2-back vs 0-back: Welch's t-test**

| ROIs                        | Mean   | 95%CI          | t     | p (unc)      | p FDR |
|-----------------------------|--------|----------------|-------|--------------|-------|
| <b>Subcortical regions</b>  |        |                |       |              |       |
| Left.Cerebellum.Cortex      | -0.011 | -0.044, 0.022  | -0.66 | 0.509        | 0.890 |
| Left.Thalamus.Proper        | -0.002 | -0.018, 0.015  | -0.18 | 0.855        | 0.992 |
| Left.Caudate                | 0.000  | -0.023, 0.023  | 0.02  | 0.982        | 0.992 |
| Left.Putamen                | 0.000  | -0.02, 0.02    | -0.03 | 0.978        | 0.992 |
| Left.Pallidum               | 0.009  | -0.008, 0.027  | 1.03  | 0.306        | 0.890 |
| Brain.Stem                  | 0.000  | -0.021, 0.021  | 0.01  | 0.990        | 0.992 |
| Left.Hippocampus            | -0.008 | -0.028, 0.012  | -0.78 | 0.438        | 0.890 |
| Left.Amygdala               | 0.005  | -0.02, 0.029   | 0.37  | 0.714        | 0.992 |
| Left.Accumbens.area         | 0.000  | -0.028, 0.028  | 0.01  | 0.989        | 0.992 |
| Left.VentralDC              | -0.015 | -0.037, 0.007  | -1.34 | 0.181        | 0.890 |
| Right.Cerebellum.Cortex     | -0.011 | -0.044, 0.022  | -0.67 | 0.501        | 0.890 |
| Right.Thalamus.Proper       | -0.007 | -0.025, 0.011  | -0.76 | 0.447        | 0.890 |
| Right.Caudate               | -0.016 | -0.04, 0.008   | -1.30 | 0.194        | 0.890 |
| Right.Putamen               | -0.008 | -0.028, 0.012  | -0.78 | 0.433        | 0.890 |
| Right.Pallidum              | -0.013 | -0.03, 0.005   | -1.44 | 0.151        | 0.890 |
| Right.Hippocampus           | -0.007 | -0.027, 0.012  | -0.74 | 0.459        | 0.890 |
| Right.Amygdala              | 0.009  | -0.015, 0.034  | 0.75  | 0.455        | 0.890 |
| Right.Accumbens.area        | -0.012 | -0.039, 0.015  | -0.88 | 0.379        | 0.890 |
| Right.VentralDC             | -0.023 | -0.044, -0.001 | -2.07 | <b>0.039</b> | 0.890 |
| <b>Cortical regions</b>     |        |                |       |              |       |
| lh_G_and_S_frontomargin     | -0.002 | -0.048, 0.045  | -0.08 | 0.939        | 0.992 |
| lh_G_and_S_occipital_inf    | -0.007 | -0.044, 0.03   | -0.38 | 0.704        | 0.992 |
| lh_G_and_S_paracentral      | 0.000  | -0.022, 0.023  | 0.04  | 0.970        | 0.992 |
| lh_G_and_S_subcentral       | -0.015 | -0.039, 0.009  | -1.23 | 0.218        | 0.890 |
| lh_G_and_S_transv_frontopol | 0.030  | -0.018, 0.077  | 1.23  | 0.221        | 0.890 |
| lh_G_and_S_cingul.Ant       | -0.003 | -0.029, 0.022  | -0.25 | 0.805        | 0.992 |
| lh_G_and_S_cingul.Mid.Ant   | -0.012 | -0.032, 0.008  | -1.16 | 0.246        | 0.890 |
| lh_G_and_S_cingul.Mid.Post  | -0.011 | -0.028, 0.007  | -1.18 | 0.238        | 0.890 |
| lh_G_cingul.Post.dorsal     | -0.005 | -0.027, 0.018  | -0.41 | 0.681        | 0.992 |

**eTable 30. Differences in functional activity between the never-suicidal group and the caregiver-reported suicidality group for 2-back vs 0-back: Welch's t-test**

| ROIs                       | Mean   | 95%CI          | t     | p (unc)      | p FDR |
|----------------------------|--------|----------------|-------|--------------|-------|
| lh_G_cingul.Post.ventral   | -0.002 | -0.05, 0.045   | -0.10 | 0.919        | 0.992 |
| lh_G_cuneus                | -0.030 | -0.062, 0.003  | -1.79 | 0.074        | 0.890 |
| lh_G_front_inf.Opercular   | 0.013  | -0.008, 0.034  | 1.18  | 0.237        | 0.890 |
| lh_G_front_inf.Orbital     | 0.002  | -0.031, 0.036  | 0.12  | 0.901        | 0.992 |
| lh_G_front_inf.Triangul    | 0.001  | -0.027, 0.03   | 0.10  | 0.919        | 0.992 |
| lh_G_front_middle          | -0.015 | -0.04, 0.01    | -1.16 | 0.248        | 0.890 |
| lh_G_front_sup             | -0.007 | -0.024, 0.009  | -0.89 | 0.375        | 0.890 |
| lh_G_Ins_lg_and_S_cent_ins | -0.001 | -0.024, 0.022  | -0.07 | 0.948        | 0.992 |
| lh_G_insular_short         | 0.004  | -0.015, 0.023  | 0.41  | 0.685        | 0.992 |
| lh_G_occipital_middle      | -0.009 | -0.033, 0.016  | -0.70 | 0.485        | 0.890 |
| lh_G_occipital_sup         | -0.015 | -0.042, 0.011  | -1.12 | 0.262        | 0.890 |
| lh_G_oc.temp_lat.fusifor   | -0.002 | -0.032, 0.029  | -0.12 | 0.903        | 0.992 |
| lh_G_oc.temp_med.Lingual   | -0.031 | -0.071, 0.008  | -1.57 | 0.118        | 0.890 |
| lh_G_oc.temp_med.Parahip   | -0.003 | -0.031, 0.025  | -0.23 | 0.820        | 0.992 |
| lh_G_orbital               | -0.023 | -0.067, 0.021  | -1.02 | 0.307        | 0.890 |
| lh_G_pariet_inf.Angular    | 0.006  | -0.02, 0.032   | 0.47  | 0.640        | 0.967 |
| lh_G_pariet_inf.Supramar   | 0.001  | -0.018, 0.021  | 0.12  | 0.903        | 0.992 |
| lh_G_parietal_sup          | -0.008 | -0.03, 0.015   | -0.66 | 0.511        | 0.890 |
| lh_G_postcentral           | -0.017 | -0.039, 0.006  | -1.43 | 0.155        | 0.890 |
| lh_G_precentral            | -0.007 | -0.024, 0.01   | -0.78 | 0.435        | 0.890 |
| lh_G_precuneus             | -0.002 | -0.025, 0.02   | -0.22 | 0.828        | 0.992 |
| lh_G_rectus                | -0.032 | -0.117, 0.053  | -0.73 | 0.463        | 0.890 |
| lh_G_subcallosal           | -0.010 | -0.052, 0.032  | -0.47 | 0.637        | 0.967 |
| lh_G_temp_sup.G_T_transv   | -0.002 | -0.025, 0.022  | -0.14 | 0.890        | 0.992 |
| lh_G_temp_sup.Lateral      | -0.011 | -0.03, 0.009   | -1.08 | 0.282        | 0.890 |
| lh_G_temp_sup.Plan_polar   | -0.023 | -0.042, -0.004 | -2.40 | <b>0.017</b> | 0.890 |
| lh_G_temp_sup.Plan_tempo   | 0.008  | -0.015, 0.03   | 0.68  | 0.497        | 0.890 |
| lh_G_temporal_inf          | 0.017  | -0.021, 0.054  | 0.89  | 0.377        | 0.890 |
| lh_G_temporal_middle       | -0.003 | -0.029, 0.023  | -0.21 | 0.830        | 0.992 |
| lh_Lat_Fis.ant.Horizontal  | -0.013 | -0.045, 0.018  | -0.85 | 0.398        | 0.890 |
| lh_Lat_Fis.ant.Vertical    | 0.026  | -0.011, 0.062  | 1.38  | 0.170        | 0.890 |
| lh_Lat_Fis.post            | 0.004  | -0.02, 0.027   | 0.31  | 0.754        | 0.992 |
| lh_Pole_occipital          | -0.028 | -0.075, 0.02   | -1.15 | 0.250        | 0.890 |
| lh_Pole_temporal           | -0.008 | -0.041, 0.025  | -0.48 | 0.634        | 0.967 |
| lh_S_calcarine             | -0.009 | -0.042, 0.025  | -0.50 | 0.617        | 0.967 |
| lh_S_central               | 0.001  | -0.023, 0.025  | 0.08  | 0.938        | 0.992 |
| lh_S_cingul.Marginalis     | 0.007  | -0.014, 0.027  | 0.64  | 0.520        | 0.890 |
| lh_S_circular_insula_ant   | 0.000  | -0.027, 0.028  | 0.03  | 0.976        | 0.992 |
| lh_S_circular_insula_inf   | 0.002  | -0.019, 0.022  | 0.15  | 0.880        | 0.992 |
| lh_S_circular_insula_sup   | 0.004  | -0.017, 0.025  | 0.36  | 0.719        | 0.992 |
| lh_S_collat_transv_ant     | 0.019  | -0.021, 0.058  | 0.94  | 0.350        | 0.890 |
| lh_S_collat_transv_post    | -0.031 | -0.065, 0.003  | -1.80 | 0.072        | 0.890 |
| lh_S_front_inf             | 0.010  | -0.019, 0.039  | 0.65  | 0.516        | 0.890 |

**eTable 30. Differences in functional activity between the never-suicidal group and the caregiver-reported suicidality group for 2-back vs 0-back: Welch's t-test**

| ROIs                         | Mean   | 95%CI         | t     | p (unc) | p FDR |
|------------------------------|--------|---------------|-------|---------|-------|
| lh_S_front_middle            | -0.027 | -0.057, 0.003 | -1.75 | 0.082   | 0.890 |
| lh_S_front_sup               | -0.001 | -0.022, 0.02  | -0.11 | 0.915   | 0.992 |
| lh_S_interm_prim.Jensen      | -0.003 | -0.035, 0.03  | -0.16 | 0.873   | 0.992 |
| lh_S_intrapariet_and_P_trans | -0.001 | -0.027, 0.025 | -0.06 | 0.954   | 0.992 |
| lh_S_oc_middle_and_Lunatus   | -0.025 | -0.058, 0.008 | -1.51 | 0.133   | 0.890 |
| lh_S_oc_sup_and_transversal  | -0.003 | -0.03, 0.024  | -0.22 | 0.827   | 0.992 |
| lh_S_occipital_ant           | -0.008 | -0.033, 0.017 | -0.61 | 0.544   | 0.895 |
| lh_S_oc.temp_lat             | 0.006  | -0.018, 0.03  | 0.50  | 0.619   | 0.967 |
| lh_S_oc.temp_med_and_Lingual | 0.001  | -0.023, 0.025 | 0.08  | 0.932   | 0.992 |
| lh_S_orbital_lateral         | -0.006 | -0.047, 0.034 | -0.31 | 0.760   | 0.992 |
| lh_S_orbital_med.olfact      | 0.066  | -0.004, 0.135 | 1.87  | 0.063   | 0.890 |
| lh_S_orbital.H_Shaped        | -0.019 | -0.052, 0.014 | -1.14 | 0.256   | 0.890 |
| lh_S_parieto_occipital       | 0.000  | -0.024, 0.024 | -0.01 | 0.992   | 0.992 |
| lh_S_pericallosal            | -0.015 | -0.042, 0.012 | -1.08 | 0.279   | 0.890 |
| lh_S_postcentral             | -0.014 | -0.035, 0.007 | -1.31 | 0.191   | 0.890 |
| lh_S_precentral.inf.part     | 0.011  | -0.017, 0.04  | 0.78  | 0.437   | 0.890 |
| lh_S_precentral.sup.part     | -0.010 | -0.031, 0.011 | -0.92 | 0.356   | 0.890 |
| lh_S_suborbital              | 0.020  | -0.037, 0.077 | 0.69  | 0.491   | 0.890 |
| lh_S_subparietal             | -0.011 | -0.038, 0.016 | -0.80 | 0.426   | 0.890 |
| lh_S_temporal_inf            | 0.004  | -0.032, 0.04  | 0.24  | 0.812   | 0.992 |
| lh_S_temporal_sup            | -0.002 | -0.023, 0.019 | -0.19 | 0.846   | 0.992 |
| lh_S_temporal_transverse     | -0.019 | -0.05, 0.013  | -1.17 | 0.242   | 0.890 |
| rh_G_and_S_frontomargin      | -0.040 | -0.092, 0.013 | -1.49 | 0.138   | 0.890 |
| rh_G_and_S_occipital_inf     | -0.015 | -0.053, 0.022 | -0.81 | 0.417   | 0.890 |
| rh_G_and_S_paracentral       | -0.011 | -0.035, 0.013 | -0.91 | 0.363   | 0.890 |
| rh_G_and_S_subcentral        | -0.020 | -0.045, 0.004 | -1.63 | 0.105   | 0.890 |
| rh_G_and_S_transv_frontopol  | -0.031 | -0.073, 0.01  | -1.48 | 0.139   | 0.890 |
| rh_G_and_S_cingul.Ant        | -0.015 | -0.043, 0.013 | -1.05 | 0.295   | 0.890 |
| rh_G_and_S_cingul.Mid.Ant    | -0.011 | -0.032, 0.01  | -1.04 | 0.300   | 0.890 |
| rh_G_and_S_cingul.Mid.Post   | -0.015 | -0.032, 0.003 | -1.68 | 0.095   | 0.890 |
| rh_G_cingul.Post.dorsal      | -0.001 | -0.022, 0.02  | -0.11 | 0.913   | 0.992 |
| rh_G_cingul.Post.ventral     | -0.012 | -0.05, 0.025  | -0.64 | 0.522   | 0.890 |
| rh_G_cuneus                  | -0.005 | -0.036, 0.027 | -0.29 | 0.773   | 0.992 |
| rh_G_front_inf.Opercular     | 0.003  | -0.018, 0.024 | 0.28  | 0.781   | 0.992 |
| rh_G_front_inf.Orbital       | 0.005  | -0.029, 0.039 | 0.27  | 0.789   | 0.992 |
| rh_G_front_inf.Triangul      | -0.010 | -0.038, 0.017 | -0.74 | 0.459   | 0.890 |
| rh_G_front_middle            | -0.010 | -0.037, 0.017 | -0.71 | 0.481   | 0.890 |
| rh_G_front_sup               | -0.013 | -0.029, 0.004 | -1.47 | 0.141   | 0.890 |
| rh_G_Ins_lg_and_S_cent_ins   | 0.002  | -0.02, 0.025  | 0.19  | 0.846   | 0.992 |
| rh_G_insular_short           | -0.008 | -0.028, 0.012 | -0.75 | 0.452   | 0.890 |
| rh_G_occipital_middle        | -0.004 | -0.028, 0.021 | -0.30 | 0.766   | 0.992 |
| rh_G_occipital_sup           | -0.006 | -0.032, 0.021 | -0.41 | 0.678   | 0.992 |
| rh_G_oc.temp_lat.fusifor     | -0.022 | -0.054, 0.01  | -1.35 | 0.179   | 0.890 |

**eTable 30. Differences in functional activity between the never-suicidal group and the caregiver-reported suicidality group for 2-back vs 0-back: Welch's t-test**

| ROIs                         | Mean   | 95%CI          | t     | p (unc)      | p FDR |
|------------------------------|--------|----------------|-------|--------------|-------|
| rh_G_oc.temp_med.Lingual     | -0.019 | -0.057, 0.019  | -0.98 | 0.330        | 0.890 |
| rh_G_oc.temp_med.Parahip     | -0.017 | -0.045, 0.012  | -1.16 | 0.245        | 0.890 |
| rh_G_orbital                 | -0.021 | -0.064, 0.022  | -0.98 | 0.329        | 0.890 |
| rh_G_pariet_inf.Angular      | -0.013 | -0.038, 0.012  | -1.00 | 0.316        | 0.890 |
| rh_G_pariet_inf.Supramar     | -0.008 | -0.027, 0.012  | -0.77 | 0.444        | 0.890 |
| rh_G_parietal_sup            | -0.014 | -0.036, 0.008  | -1.26 | 0.210        | 0.890 |
| rh_G_postcentral             | -0.024 | -0.047, -0.002 | -2.17 | <b>0.031</b> | 0.890 |
| rh_G_precentral              | -0.013 | -0.03, 0.004   | -1.52 | 0.130        | 0.890 |
| rh_G_precuneus               | 0.005  | -0.02, 0.029   | 0.37  | 0.710        | 0.992 |
| rh_G_rectus                  | 0.032  | -0.073, 0.137  | 0.60  | 0.548        | 0.895 |
| rh_G_subcallosal             | 0.007  | -0.035, 0.048  | 0.32  | 0.753        | 0.992 |
| rh_G_temp_sup.G_T_transv     | 0.008  | -0.017, 0.033  | 0.64  | 0.523        | 0.890 |
| rh_G_temp_sup.Lateral        | -0.017 | -0.035, 0.002  | -1.80 | 0.073        | 0.890 |
| rh_G_temp_sup.Plan_polar     | -0.014 | -0.033, 0.006  | -1.40 | 0.163        | 0.890 |
| rh_G_temp_sup.Plan_tempo     | 0.002  | -0.02, 0.024   | 0.19  | 0.850        | 0.992 |
| rh_G_temporal_inf            | 0.028  | -0.014, 0.07   | 1.29  | 0.196        | 0.890 |
| rh_G_temporal_middle         | -0.022 | -0.047, 0.003  | -1.71 | 0.088        | 0.890 |
| rh_Lat_Fis.ant.Horizontal    | 0.008  | -0.023, 0.038  | 0.49  | 0.621        | 0.967 |
| rh_Lat_Fis.ant.Vertical      | 0.012  | -0.027, 0.051  | 0.60  | 0.552        | 0.895 |
| rh_Lat_Fis.post              | -0.009 | -0.035, 0.017  | -0.67 | 0.505        | 0.890 |
| rh_Pole_occipital            | -0.010 | -0.054, 0.034  | -0.46 | 0.642        | 0.967 |
| rh_Pole_temporal             | -0.012 | -0.048, 0.025  | -0.62 | 0.533        | 0.892 |
| rh_S_calcarine               | -0.009 | -0.042, 0.024  | -0.55 | 0.584        | 0.937 |
| rh_S_central                 | -0.009 | -0.033, 0.015  | -0.75 | 0.456        | 0.890 |
| rh_S_cingul.Marginalis       | -0.002 | -0.021, 0.018  | -0.16 | 0.874        | 0.992 |
| rh_S_circular_insula_ant     | -0.010 | -0.038, 0.018  | -0.68 | 0.495        | 0.890 |
| rh_S_circular_insula_inf     | -0.009 | -0.029, 0.012  | -0.85 | 0.396        | 0.890 |
| rh_S_circular_insula_sup     | 0.009  | -0.011, 0.029  | 0.89  | 0.373        | 0.890 |
| rh_S_collat_transv_ant       | -0.013 | -0.052, 0.026  | -0.68 | 0.500        | 0.890 |
| rh_S_collat_transv_post      | -0.007 | -0.039, 0.025  | -0.43 | 0.670        | 0.992 |
| rh_S_front_inf               | 0.001  | -0.027, 0.029  | 0.06  | 0.949        | 0.992 |
| rh_S_front_middle            | -0.027 | -0.056, 0.003  | -1.77 | 0.077        | 0.890 |
| rh_S_front_sup               | -0.020 | -0.043, 0.003  | -1.70 | 0.091        | 0.890 |
| rh_S_interm_prim.Jensen      | 0.004  | -0.028, 0.035  | 0.22  | 0.824        | 0.992 |
| rh_S_intrapariet_and_P_trans | 0.009  | -0.016, 0.035  | 0.72  | 0.471        | 0.890 |
| rh_S_oc_middle_and_Lunatus   | -0.039 | -0.07, -0.007  | -2.41 | <b>0.016</b> | 0.890 |
| rh_S_oc_sup_and_transversal  | -0.019 | -0.044, 0.006  | -1.51 | 0.132        | 0.890 |
| rh_S_occipital_ant           | -0.009 | -0.032, 0.015  | -0.73 | 0.466        | 0.890 |
| rh_S_oc.temp_lat             | -0.029 | -0.054, -0.004 | -2.27 | <b>0.024</b> | 0.890 |
| rh_S_oc.temp_med_and_Lingual | -0.004 | -0.029, 0.02   | -0.35 | 0.729        | 0.992 |
| rh_S_orbital_lateral         | -0.015 | -0.051, 0.021  | -0.80 | 0.423        | 0.890 |
| rh_S_orbital_med.olfact      | -0.006 | -0.074, 0.062  | -0.18 | 0.857        | 0.992 |
| rh_S_orbital.H_Shaped        | 0.002  | -0.032, 0.035  | 0.10  | 0.922        | 0.992 |



**eTable 30. Differences in functional activity between the never-suicidal group and the caregiver-reported suicidality group for 2-back vs 0-back: Welch's t-test**

| ROIs                     | Mean   | 95%CI         | t     | p (unc) | p FDR |
|--------------------------|--------|---------------|-------|---------|-------|
| rh_S_parieto_occipital   | -0.008 | -0.031, 0.015 | -0.68 | 0.499   | 0.890 |
| rh_S_pericallosal        | -0.010 | -0.04, 0.02   | -0.67 | 0.502   | 0.890 |
| rh_S_postcentral         | -0.014 | -0.034, 0.006 | -1.34 | 0.180   | 0.890 |
| rh_S_precentral.inf.part | 0.010  | -0.017, 0.037 | 0.74  | 0.460   | 0.890 |
| rh_S_precentral.sup.part | -0.004 | -0.024, 0.017 | -0.34 | 0.737   | 0.992 |
| rh_S_suborbital          | 0.007  | -0.075, 0.088 | 0.16  | 0.873   | 0.992 |
| rh_S_subparietal         | -0.010 | -0.038, 0.017 | -0.73 | 0.465   | 0.890 |
| rh_S_temporal_inf        | -0.004 | -0.046, 0.039 | -0.18 | 0.853   | 0.992 |
| rh_S_temporal_sup        | -0.015 | -0.034, 0.004 | -1.58 | 0.116   | 0.890 |
| rh_S_temporal_transverse | -0.010 | -0.042, 0.022 | -0.62 | 0.534   | 0.892 |

**Bold** denotes group differences at  $p < 0.05$  uncorrected

**eTable 31. Differences in functional activity between the never-suicidal group and the concordantly-reported suicidality group for 2-back vs 0-back: Welch's t-test**

| ROIs                       | Mean   | 95%CI         | t     | p (unc) | p FDR |
|----------------------------|--------|---------------|-------|---------|-------|
| <b>Subcortical regions</b> |        |               |       |         |       |
| Left.Cerebellum.Cortex     | -0.011 | -0.067, 0.046 | -0.38 | 0.706   | 0.984 |
| Left.Thalamus.Proper       | 0.016  | -0.013, 0.045 | 1.09  | 0.280   | 0.984 |
| Left.Caudate               | 0.002  | -0.034, 0.037 | 0.09  | 0.929   | 0.984 |
| Left.Putamen               | 0.007  | -0.025, 0.04  | 0.46  | 0.650   | 0.984 |
| Left.Pallidum              | 0.015  | -0.014, 0.043 | 1.00  | 0.320   | 0.984 |
| Brain.Stem                 | 0.004  | -0.031, 0.04  | 0.24  | 0.812   | 0.984 |
| Left.Hippocampus           | -0.008 | -0.041, 0.025 | -0.47 | 0.641   | 0.984 |
| Left.Amygdala              | -0.007 | -0.042, 0.029 | -0.36 | 0.717   | 0.984 |
| Left.Accumbens.area        | -0.014 | -0.055, 0.027 | -0.70 | 0.488   | 0.984 |
| Left.VentralDC             | -0.002 | -0.038, 0.033 | -0.13 | 0.895   | 0.984 |
| Right.Cerebellum.Cortex    | 0.018  | -0.035, 0.071 | 0.69  | 0.491   | 0.984 |
| Right.Thalamus.Proper      | -0.006 | -0.036, 0.025 | -0.36 | 0.719   | 0.984 |
| Right.Caudate              | -0.009 | -0.05, 0.032  | -0.44 | 0.661   | 0.984 |
| Right.Putamen              | -0.004 | -0.037, 0.029 | -0.23 | 0.822   | 0.984 |
| Right.Pallidum             | -0.016 | -0.046, 0.013 | -1.09 | 0.280   | 0.984 |
| Right.Hippocampus          | 0.008  | -0.024, 0.04  | 0.50  | 0.617   | 0.984 |
| Right.Amygdala             | -0.011 | -0.048, 0.026 | -0.59 | 0.558   | 0.984 |
| Right.Accumbens.area       | -0.004 | -0.05, 0.043  | -0.15 | 0.880   | 0.984 |
| Right.VentralDC            | -0.014 | -0.049, 0.022 | -0.78 | 0.440   | 0.984 |

**eTable 31. Differences in functional activity between the never-suicidal group and the concordantly-reported suicidality group for 2-back vs 0-back: Welch's t-test**

| ROIs                        | Mean   | 95%CI         | t     | p (unc) | p FDR |
|-----------------------------|--------|---------------|-------|---------|-------|
| <b>Cortical regions</b>     |        |               |       |         |       |
| lh_G_and_S_frontomargin     | -0.021 | -0.107, 0.065 | -0.48 | 0.629   | 0.984 |
| lh_G_and_S_occipital_inf    | -0.010 | -0.073, 0.053 | -0.31 | 0.757   | 0.984 |
| lh_G_and_S_paracentral      | -0.015 | -0.052, 0.021 | -0.83 | 0.409   | 0.984 |
| lh_G_and_S_subcentral       | -0.019 | -0.06, 0.021  | -0.94 | 0.349   | 0.984 |
| lh_G_and_S_transv_frontopol | 0.016  | -0.074, 0.105 | 0.35  | 0.728   | 0.984 |
| lh_G_and_S_cingul.Ant       | -0.011 | -0.051, 0.028 | -0.57 | 0.568   | 0.984 |
| lh_G_and_S_cingul.Mid.Ant   | -0.003 | -0.036, 0.03  | -0.18 | 0.859   | 0.984 |
| lh_G_and_S_cingul.Mid.Post  | -0.001 | -0.031, 0.029 | -0.06 | 0.949   | 0.984 |
| lh_G_cingul.Post.dorsal     | 0.006  | -0.027, 0.04  | 0.38  | 0.708   | 0.984 |
| lh_G_cingul.Post.ventral    | 0.009  | -0.07, 0.087  | 0.22  | 0.826   | 0.984 |
| lh_G_cuneus                 | -0.029 | -0.081, 0.023 | -1.10 | 0.275   | 0.984 |
| lh_G_front_inf.Opercular    | 0.032  | -0.005, 0.069 | 1.71  | 0.091   | 0.984 |
| lh_G_front_inf.Orbital      | -0.028 | -0.089, 0.033 | -0.91 | 0.364   | 0.984 |
| lh_G_front_inf.Triangul     | -0.012 | -0.059, 0.036 | -0.48 | 0.631   | 0.984 |
| lh_G_front_middle           | 0.019  | -0.021, 0.06  | 0.95  | 0.346   | 0.984 |
| lh_G_front_sup              | -0.018 | -0.045, 0.009 | -1.33 | 0.188   | 0.984 |
| lh_G_Ins_lg_and_S_cent_ins  | -0.010 | -0.048, 0.027 | -0.54 | 0.589   | 0.984 |
| lh_G_insular_short          | 0.007  | -0.024, 0.039 | 0.46  | 0.647   | 0.984 |
| lh_G_occipital_middle       | -0.023 | -0.064, 0.019 | -1.08 | 0.283   | 0.984 |
| lh_G_occipital_sup          | -0.007 | -0.051, 0.038 | -0.30 | 0.762   | 0.984 |
| lh_G_oc.temp_lat.fusifor    | -0.016 | -0.061, 0.028 | -0.73 | 0.465   | 0.984 |
| lh_G_oc.temp_med.Lingual    | -0.037 | -0.102, 0.029 | -1.12 | 0.267   | 0.984 |
| lh_G_oc.temp_med.Parahip    | 0.003  | -0.05, 0.056  | 0.12  | 0.908   | 0.984 |
| lh_G_orbital                | -0.012 | -0.08, 0.057  | -0.33 | 0.740   | 0.984 |
| lh_G_pariet_inf.Angular     | 0.025  | -0.018, 0.068 | 1.17  | 0.246   | 0.984 |
| lh_G_pariet_inf.Supramar    | 0.009  | -0.026, 0.043 | 0.49  | 0.626   | 0.984 |
| lh_G_parietal_sup           | 0.001  | -0.036, 0.037 | 0.04  | 0.967   | 0.989 |
| lh_G_postcentral            | -0.009 | -0.047, 0.029 | -0.46 | 0.650   | 0.984 |
| lh_G_precentral             | -0.008 | -0.037, 0.02  | -0.58 | 0.562   | 0.984 |
| lh_G_precuneus              | 0.011  | -0.025, 0.047 | 0.61  | 0.545   | 0.984 |
| lh_G_rectus                 | -0.006 | -0.15, 0.138  | -0.09 | 0.930   | 0.984 |
| lh_G_subcallosal            | -0.044 | -0.113, 0.025 | -1.27 | 0.208   | 0.984 |
| lh_G_temp_sup.G_T_transv    | -0.012 | -0.051, 0.027 | -0.62 | 0.533   | 0.984 |
| lh_G_temp_sup.Lateral       | -0.025 | -0.059, 0.008 | -1.50 | 0.137   | 0.984 |
| lh_G_temp_sup.Plan_polar    | -0.023 | -0.053, 0.007 | -1.52 | 0.131   | 0.984 |
| lh_G_temp_sup.Plan_tempo    | 0.005  | -0.034, 0.043 | 0.24  | 0.812   | 0.984 |
| lh_G_temporal_inf           | 0.042  | -0.019, 0.104 | 1.36  | 0.176   | 0.984 |
| lh_G_temporal_middle        | 0.011  | -0.03, 0.052  | 0.53  | 0.599   | 0.984 |
| lh_Lat_Fis.ant.Horizontal   | -0.050 | -0.101, 0.001 | -1.96 | 0.053   | 0.984 |
| lh_Lat_Fis.ant.Vertical     | 0.052  | -0.006, 0.11  | 1.76  | 0.081   | 0.984 |
| lh_Lat_Fis.post             | -0.001 | -0.04, 0.038  | -0.04 | 0.970   | 0.989 |
| lh_Pole_occipital           | -0.034 | -0.105, 0.036 | -0.97 | 0.335   | 0.984 |

**eTable 31. Differences in functional activity between the never-suicidal group and the concordantly-reported suicidality group for 2-back vs 0-back: Welch's t-test**

| ROIs                         | Mean   | 95%CI          | t     | p (unc)      | p FDR |
|------------------------------|--------|----------------|-------|--------------|-------|
| lh_Pole_temporal             | -0.038 | -0.098, 0.023  | -1.24 | 0.216        | 0.984 |
| lh_S_calcarine               | -0.012 | -0.067, 0.043  | -0.44 | 0.660        | 0.984 |
| lh_S_central                 | -0.012 | -0.051, 0.028  | -0.58 | 0.560        | 0.984 |
| lh_S_cingul.Marginalis       | 0.003  | -0.027, 0.033  | 0.20  | 0.843        | 0.984 |
| lh_S_circular_insula_ant     | -0.008 | -0.057, 0.042  | -0.30 | 0.763        | 0.984 |
| lh_S_circular_insula_inf     | -0.016 | -0.049, 0.017  | -0.98 | 0.328        | 0.984 |
| lh_S_circular_insula_sup     | 0.002  | -0.033, 0.038  | 0.14  | 0.893        | 0.984 |
| lh_S_collat_transv_ant       | 0.016  | -0.05, 0.081   | 0.48  | 0.634        | 0.984 |
| lh_S_collat_transv_post      | -0.028 | -0.087, 0.031  | -0.93 | 0.355        | 0.984 |
| lh_S_front_inf               | 0.004  | -0.046, 0.054  | 0.16  | 0.871        | 0.984 |
| lh_S_front_middle            | -0.027 | -0.077, 0.023  | -1.07 | 0.287        | 0.984 |
| lh_S_front_sup               | 0.018  | -0.016, 0.052  | 1.04  | 0.302        | 0.984 |
| lh_S_interm_prim.Jensen      | 0.027  | -0.024, 0.077  | 1.05  | 0.297        | 0.984 |
| lh_S_intrapariet_and_P_trans | 0.012  | -0.033, 0.058  | 0.53  | 0.596        | 0.984 |
| lh_S_oc_middle_and_Lunatus   | -0.048 | -0.099, 0.003  | -1.87 | 0.064        | 0.984 |
| lh_S_oc_sup_and_transversal  | 0.003  | -0.043, 0.05   | 0.14  | 0.888        | 0.984 |
| lh_S_occipital_ant           | 0.001  | -0.036, 0.039  | 0.08  | 0.940        | 0.984 |
| lh_S_oc.temp_lat             | -0.019 | -0.06, 0.022   | -0.91 | 0.363        | 0.984 |
| lh_S_oc.temp_med_and_Lingual | -0.002 | -0.039, 0.035  | -0.11 | 0.911        | 0.984 |
| lh_S_orbital_lateral         | 0.029  | -0.041, 0.099  | 0.81  | 0.419        | 0.984 |
| lh_S_orbital_med.olfact      | 0.080  | -0.028, 0.187  | 1.47  | 0.144        | 0.984 |
| lh_S_orbital.H_Shaped        | -0.034 | -0.089, 0.021  | -1.22 | 0.226        | 0.984 |
| lh_S_parieto_occipital       | 0.003  | -0.035, 0.042  | 0.17  | 0.869        | 0.984 |
| lh_S_pericallosal            | -0.003 | -0.048, 0.042  | -0.13 | 0.894        | 0.984 |
| lh_S_postcentral             | 0.005  | -0.03, 0.041   | 0.30  | 0.762        | 0.984 |
| lh_S_precentral.inf.part     | 0.028  | -0.018, 0.074  | 1.20  | 0.233        | 0.984 |
| lh_S_precentral.sup.part     | 0.006  | -0.03, 0.042   | 0.34  | 0.737        | 0.984 |
| lh_S_suborbital              | -0.014 | -0.112, 0.084  | -0.29 | 0.773        | 0.984 |
| lh_S_subparietal             | -0.018 | -0.06, 0.023   | -0.88 | 0.380        | 0.984 |
| lh_S_temporal_inf            | 0.027  | -0.027, 0.082  | 1.00  | 0.320        | 0.984 |
| lh_S_temporal_sup            | 0.007  | -0.025, 0.04   | 0.44  | 0.660        | 0.984 |
| lh_S_temporal_transverse     | -0.063 | -0.116, -0.011 | -2.39 | <b>0.019</b> | 0.984 |
| rh_G_and_S_frontomargin      | 0.031  | -0.065, 0.127  | 0.64  | 0.524        | 0.984 |
| rh_G_and_S_occipital_inf     | -0.025 | -0.093, 0.043  | -0.73 | 0.464        | 0.984 |
| rh_G_and_S_paracentral       | -0.023 | -0.066, 0.02   | -1.07 | 0.285        | 0.984 |
| rh_G_and_S_subcentral        | -0.041 | -0.083, 0.001  | -1.95 | 0.054        | 0.984 |
| rh_G_and_S_transv_frontopol  | -0.025 | -0.098, 0.048  | -0.68 | 0.500        | 0.984 |
| rh_G_and_S_cingul.Ant        | -0.029 | -0.072, 0.014  | -1.33 | 0.188        | 0.984 |
| rh_G_and_S_cingul.Mid.Ant    | 0.005  | -0.03, 0.041   | 0.30  | 0.763        | 0.984 |
| rh_G_and_S_cingul.Mid.Post   | -0.002 | -0.033, 0.028  | -0.16 | 0.875        | 0.984 |
| rh_G_cingul.Post.dorsal      | 0.014  | -0.02, 0.049   | 0.83  | 0.409        | 0.984 |
| rh_G_cingul.Post.ventral     | 0.007  | -0.052, 0.065  | 0.23  | 0.819        | 0.984 |
| rh_G_cuneus                  | -0.023 | -0.075, 0.029  | -0.88 | 0.384        | 0.984 |

**eTable 31. Differences in functional activity between the never-suicidal group and the concordantly-reported suicidality group for 2-back vs 0-back: Welch's t-test**

| ROIs                       | Mean   | 95%CI          | t     | p (unc)      | p FDR |
|----------------------------|--------|----------------|-------|--------------|-------|
| rh_G_front_inf.Opercular   | 0.013  | -0.021, 0.047  | 0.77  | 0.444        | 0.984 |
| rh_G_front_inf.Orbital     | 0.000  | -0.065, 0.066  | 0.01  | 0.990        | 0.990 |
| rh_G_front_inf.Triangul    | 0.002  | -0.044, 0.049  | 0.10  | 0.919        | 0.984 |
| rh_G_front_middle          | -0.019 | -0.065, 0.027  | -0.84 | 0.405        | 0.984 |
| rh_G_front_sup             | -0.016 | -0.048, 0.015  | -1.02 | 0.312        | 0.984 |
| rh_G_Ins_lg_and_S_cent_ins | -0.022 | -0.06, 0.015   | -1.19 | 0.236        | 0.984 |
| rh_G_insular_short         | 0.000  | -0.033, 0.032  | -0.02 | 0.983        | 0.989 |
| rh_G_occipital_middle      | -0.002 | -0.043, 0.039  | -0.09 | 0.929        | 0.984 |
| rh_G_occipital_sup         | -0.002 | -0.046, 0.043  | -0.07 | 0.944        | 0.984 |
| rh_G_oc.temp_lat.fusifor   | -0.009 | -0.063, 0.045  | -0.33 | 0.745        | 0.984 |
| rh_G_oc.temp_med.Lingual   | -0.001 | -0.068, 0.066  | -0.03 | 0.978        | 0.989 |
| rh_G_oc.temp_med.Parahip   | -0.015 | -0.063, 0.034  | -0.61 | 0.544        | 0.984 |
| rh_G_orbital               | 0.017  | -0.057, 0.091  | 0.46  | 0.646        | 0.984 |
| rh_G_pariet_inf.Angular    | 0.006  | -0.037, 0.049  | 0.29  | 0.773        | 0.984 |
| rh_G_pariet_inf.Supramar   | 0.002  | -0.031, 0.035  | 0.11  | 0.909        | 0.984 |
| rh_G_parietal_sup          | 0.004  | -0.032, 0.041  | 0.24  | 0.814        | 0.984 |
| rh_G_postcentral           | -0.022 | -0.061, 0.017  | -1.13 | 0.260        | 0.984 |
| rh_G_precentral            | -0.010 | -0.04, 0.021   | -0.63 | 0.529        | 0.984 |
| rh_G_precuneus             | 0.022  | -0.017, 0.061  | 1.14  | 0.258        | 0.984 |
| rh_G_rectus                | 0.116  | -0.034, 0.265  | 1.54  | 0.127        | 0.984 |
| rh_G_subcallosal           | -0.014 | -0.082, 0.054  | -0.40 | 0.690        | 0.984 |
| rh_G_temp_sup.G_T_transv   | -0.010 | -0.055, 0.036  | -0.42 | 0.674        | 0.984 |
| rh_G_temp_sup.Lateral      | -0.034 | -0.066, -0.001 | -2.07 | <b>0.041</b> | 0.984 |
| rh_G_temp_sup.Plan_polar   | 0.006  | -0.027, 0.04   | 0.38  | 0.705        | 0.984 |
| rh_G_temp_sup.Plan_tempo   | -0.014 | -0.052, 0.025  | -0.71 | 0.478        | 0.984 |
| rh_G_temporal_inf          | 0.066  | 0.004, 0.127   | 2.13  | <b>0.036</b> | 0.984 |
| rh_G_temporal_middle       | 0.001  | -0.039, 0.041  | 0.03  | 0.973        | 0.989 |
| rh_Lat_Fis.ant.Horizontal  | -0.014 | -0.063, 0.035  | -0.57 | 0.571        | 0.984 |
| rh_Lat_Fis.ant.Vertical    | 0.006  | -0.06, 0.072   | 0.19  | 0.849        | 0.984 |
| rh_Lat_Fis.post            | -0.032 | -0.074, 0.01   | -1.49 | 0.138        | 0.984 |
| rh_Pole_occipital          | -0.006 | -0.083, 0.07   | -0.16 | 0.872        | 0.984 |
| rh_Pole_temporal           | -0.032 | -0.102, 0.037  | -0.92 | 0.360        | 0.984 |
| rh_S_calcarine             | -0.012 | -0.07, 0.045   | -0.42 | 0.673        | 0.984 |
| rh_S_central               | -0.020 | -0.061, 0.022  | -0.94 | 0.350        | 0.984 |
| rh_S_cingul.Marginalis     | 0.007  | -0.025, 0.039  | 0.43  | 0.670        | 0.984 |
| rh_S_circular_insula_ant   | -0.009 | -0.053, 0.035  | -0.40 | 0.688        | 0.984 |
| rh_S_circular_insula_inf   | -0.021 | -0.059, 0.018  | -1.05 | 0.297        | 0.984 |
| rh_S_circular_insula_sup   | 0.013  | -0.019, 0.046  | 0.83  | 0.411        | 0.984 |
| rh_S_collat_transv_ant     | 0.004  | -0.057, 0.065  | 0.14  | 0.890        | 0.984 |
| rh_S_collat_transv_post    | 0.011  | -0.04, 0.062   | 0.43  | 0.665        | 0.984 |
| rh_S_front_inf             | -0.011 | -0.056, 0.035  | -0.47 | 0.639        | 0.984 |
| rh_S_front_middle          | -0.029 | -0.081, 0.023  | -1.12 | 0.265        | 0.984 |
| rh_S_front_sup             | 0.011  | -0.026, 0.048  | 0.57  | 0.572        | 0.984 |

**eTable 31. Differences in functional activity between the never-suicidal group and the concordantly-reported suicidality group for 2-back vs 0-back: Welch's t-test**

| ROIs                         | Mean   | 95%CI          | t     | p (unc)      | p FDR |
|------------------------------|--------|----------------|-------|--------------|-------|
| rh_S_interm_prim.Jensen      | 0.007  | -0.045, 0.058  | 0.26  | 0.797        | 0.984 |
| rh_S_intrapariet_and_P_trans | 0.036  | -0.009, 0.08   | 1.60  | 0.114        | 0.984 |
| rh_S_oc_middle_and_Lunatus   | -0.031 | -0.082, 0.02   | -1.21 | 0.230        | 0.984 |
| rh_S_oc_sup_and_transversal  | -0.024 | -0.063, 0.014  | -1.25 | 0.213        | 0.984 |
| rh_S_occipital_ant           | -0.023 | -0.067, 0.021  | -1.05 | 0.298        | 0.984 |
| rh_S_oc.temp_lat             | -0.056 | -0.099, -0.013 | -2.60 | <b>0.011</b> | 0.984 |
| rh_S_oc.temp_med_and_Lingual | -0.002 | -0.042, 0.039  | -0.08 | 0.934        | 0.984 |
| rh_S_orbital_lateral         | -0.031 | -0.093, 0.031  | -1.00 | 0.321        | 0.984 |
| rh_S_orbital_med.olfact      | -0.026 | -0.144, 0.092  | -0.44 | 0.663        | 0.984 |
| rh_S_orbital.H_Shaped        | 0.037  | -0.021, 0.095  | 1.26  | 0.211        | 0.984 |
| rh_S_parieto_occipital       | 0.004  | -0.034, 0.042  | 0.20  | 0.843        | 0.984 |
| rh_S_pericallosal            | -0.002 | -0.046, 0.042  | -0.10 | 0.924        | 0.984 |
| rh_S_postcentral             | 0.005  | -0.029, 0.038  | 0.28  | 0.782        | 0.984 |
| rh_S_precentral.inf.part     | 0.013  | -0.031, 0.058  | 0.61  | 0.545        | 0.984 |
| rh_S_precentral.sup.part     | 0.019  | -0.016, 0.055  | 1.08  | 0.283        | 0.984 |
| rh_S_suborbital              | 0.012  | -0.12, 0.145   | 0.18  | 0.856        | 0.984 |
| rh_S_subparietal             | -0.005 | -0.051, 0.04   | -0.23 | 0.821        | 0.984 |
| rh_S_temporal_inf            | 0.005  | -0.059, 0.069  | 0.16  | 0.875        | 0.984 |
| rh_S_temporal_sup            | -0.015 | -0.047, 0.016  | -0.97 | 0.336        | 0.984 |
| rh_S_temporal_transverse     | -0.030 | -0.084, 0.024  | -1.11 | 0.271        | 0.984 |

**Bold** denotes group differences at p<0.05 uncorrected

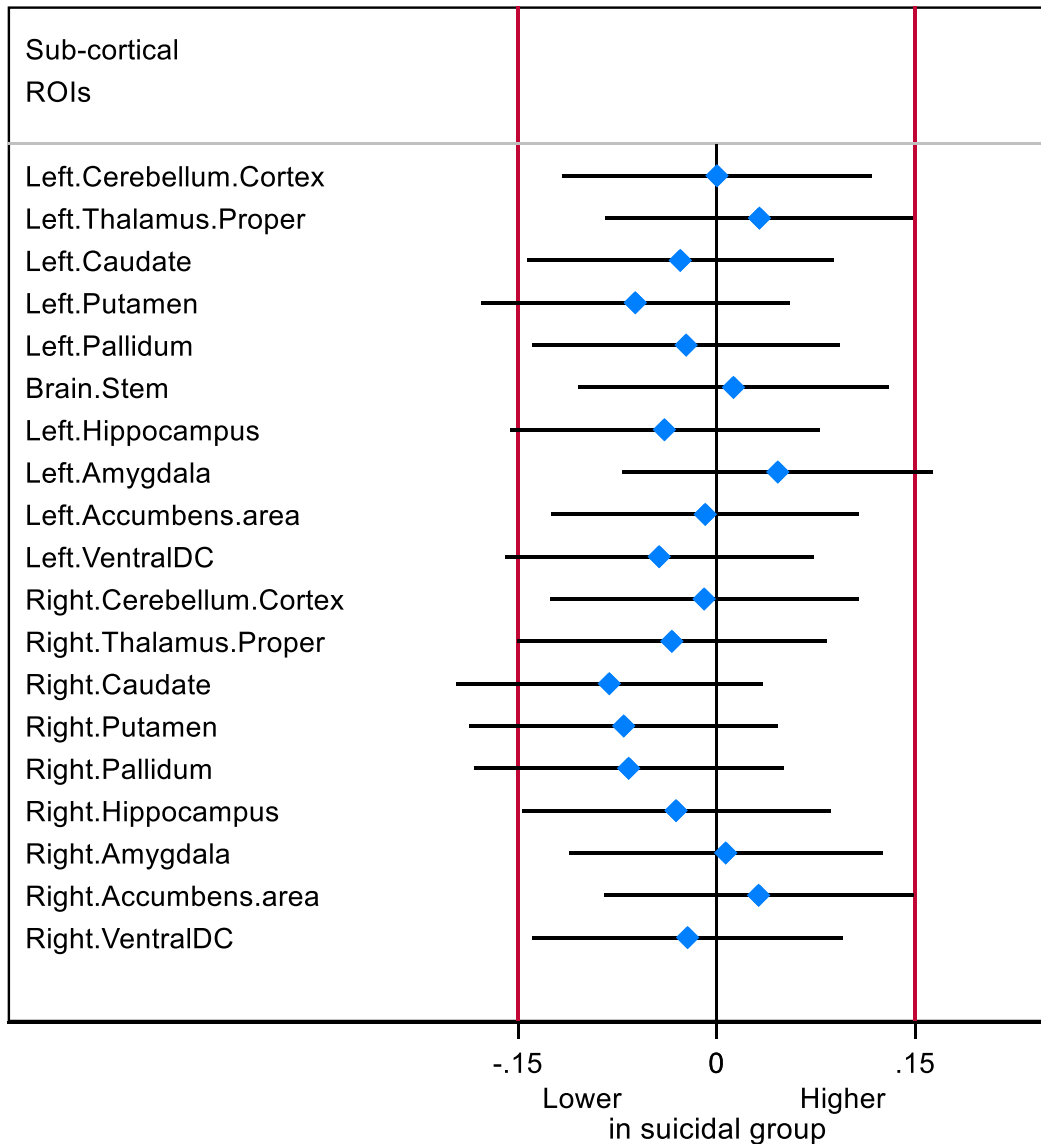

**eFigure 48.** Results of the Equivalence test for differences in functional activity in subcortical regions between the never-suicidal group and the child-reported suicidality group for 2-back vs 0-back. The figure shows the effect sizes and 95% confidence intervals of the difference against the interval of equivalence (-0.15 to 0.15).

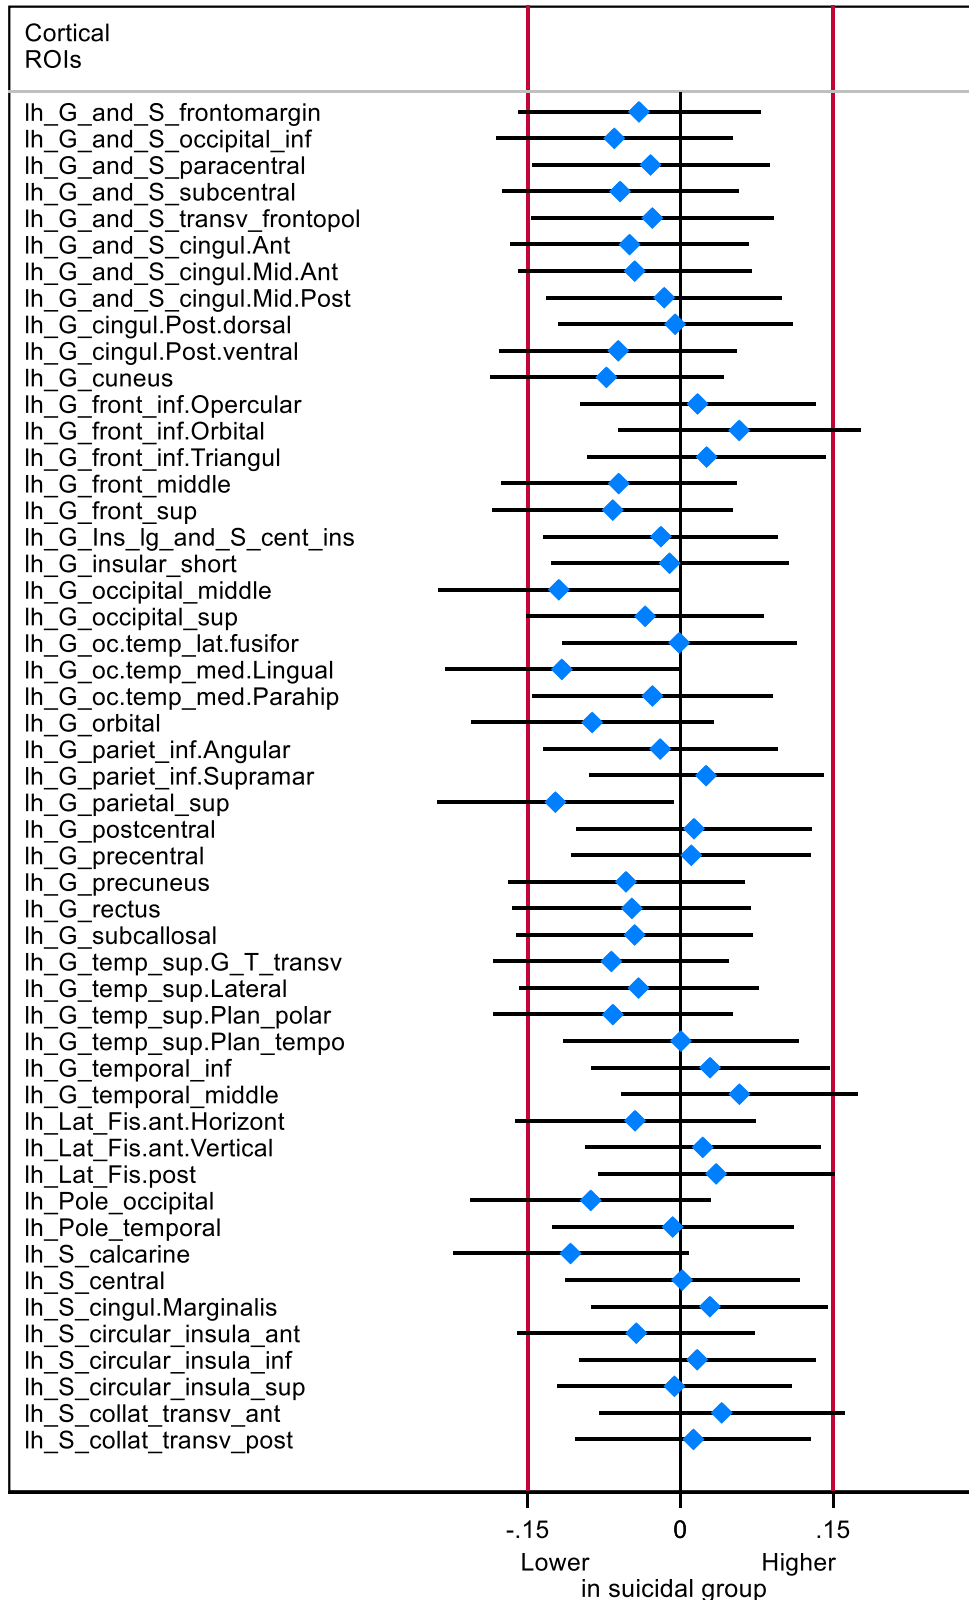

**eFigure 49 (1 of 3).** Results of the Equivalence test for differences in functional activity in cortical regions between the never-suicidal group and the child-reported suicidality group for 2-back vs 0-back. The figure shows the effect sizes and 95% confidence intervals of the difference against the interval of equivalence (-0.15 to 0.15).

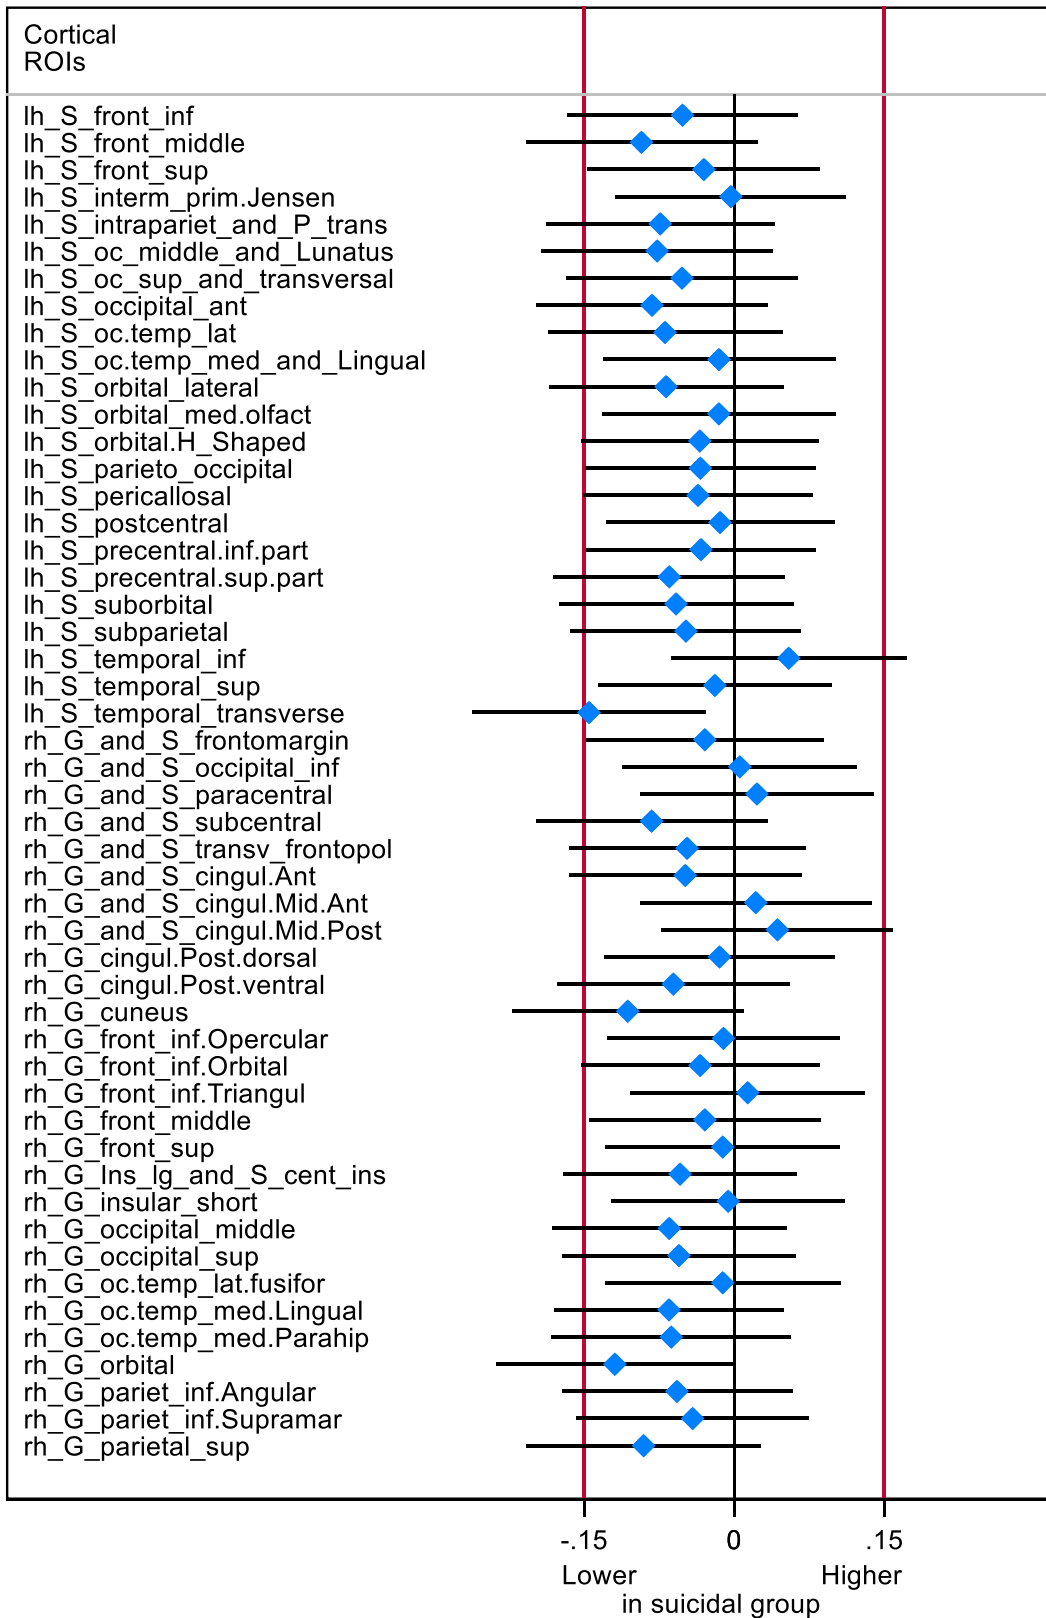

**eFigure 49 (2 of 3).** Results of the Equivalence test for differences in functional activity in cortical regions between the never-suicidal group and the child-reported suicidality group for 2-back vs 0-back. The figure shows the effect sizes and 95% confidence intervals of the difference against the interval of equivalence (-0.15 to 0.15).



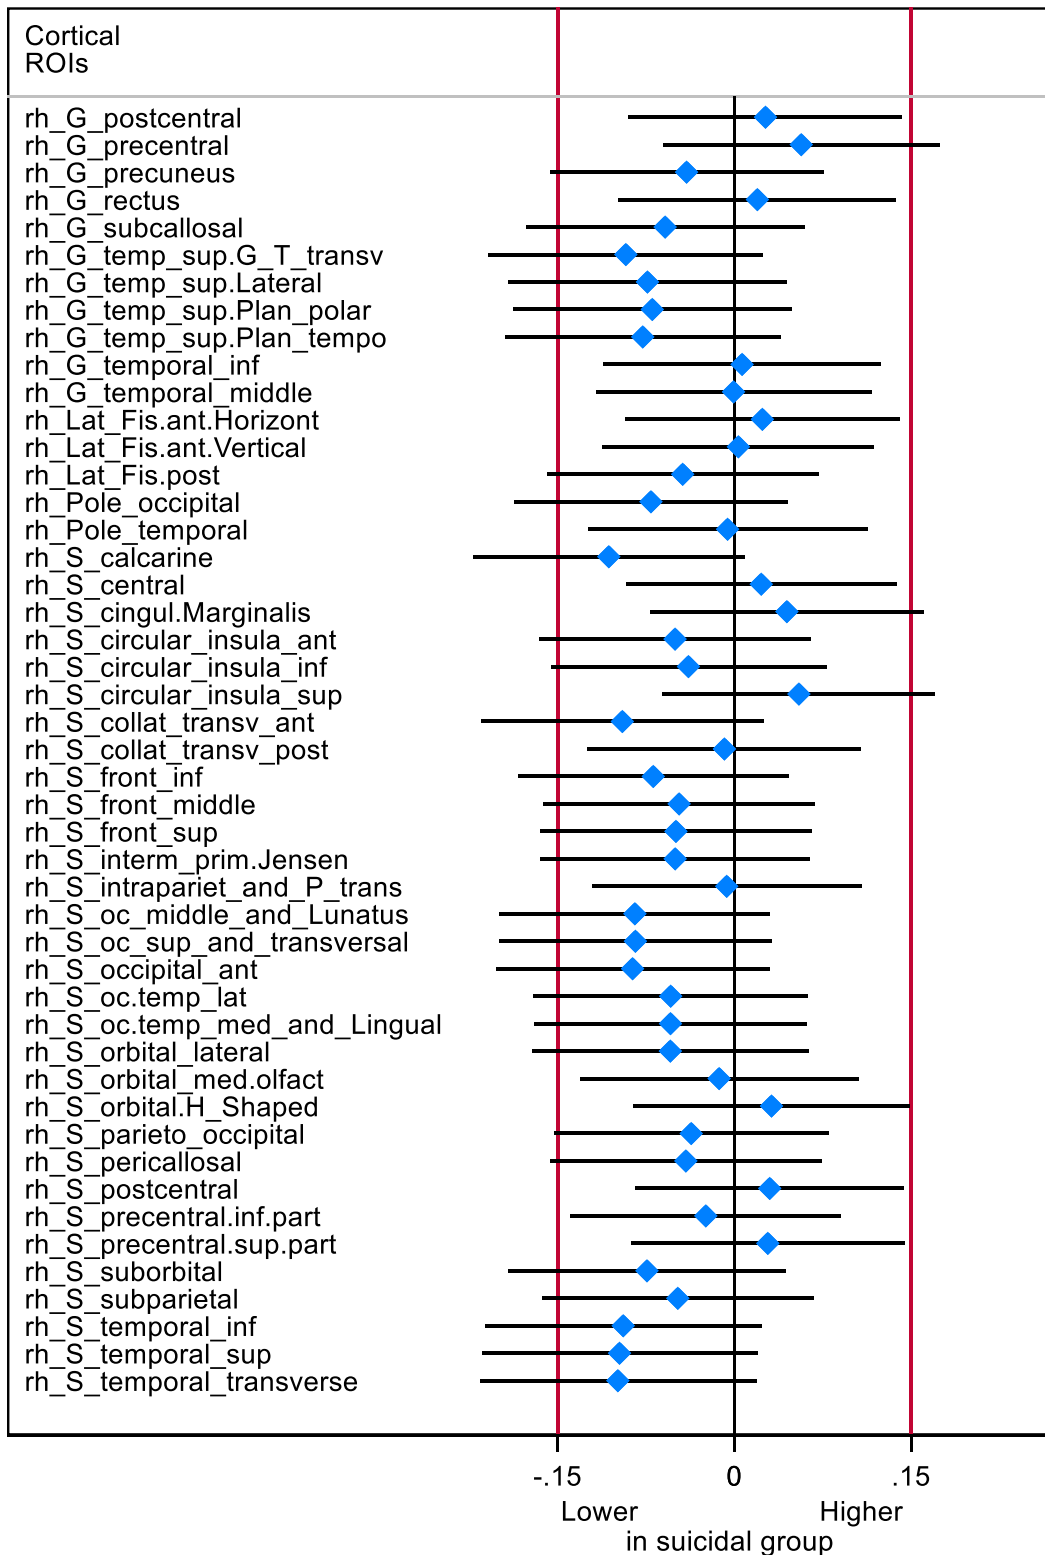

**eFigure 49 (3 of 3).** Results of the Equivalence test for differences in functional activity in cortical regions between the never-suicidal group and the child-reported suicidality group for 2-back vs 0-back. The figure shows the effect sizes and 95% confidence intervals of the difference against the interval of equivalence (-0.15 to 0.15).

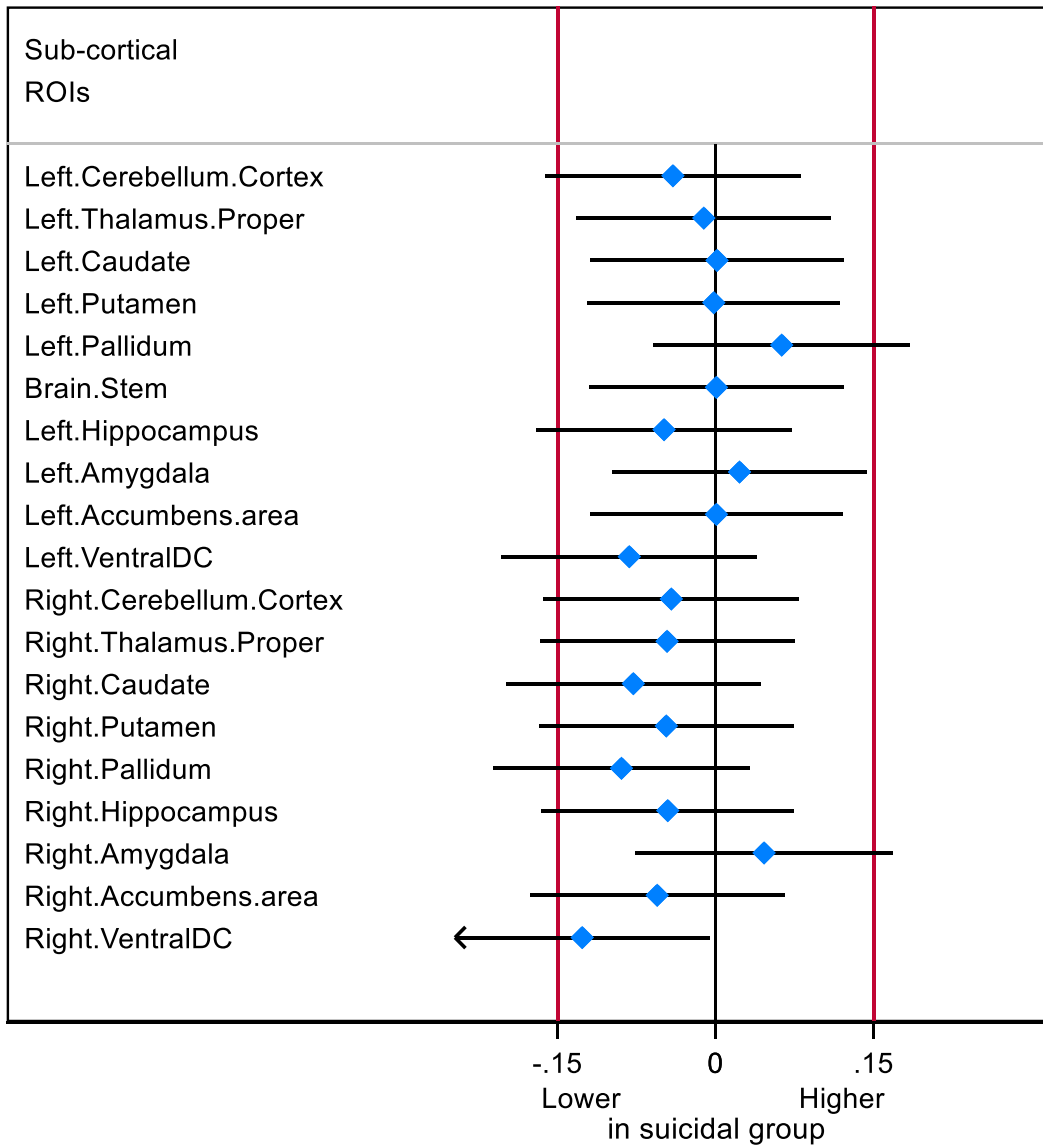

**eFigure 50.** Results of the Equivalence test for differences in functional activity in subcortical regions between the never-suicidal group and the caregiver-reported suicidality group for 2-back vs 0-back. The figure shows the effect sizes and 95% confidence intervals of the difference against the interval of equivalence (-0.15 to 0.15).

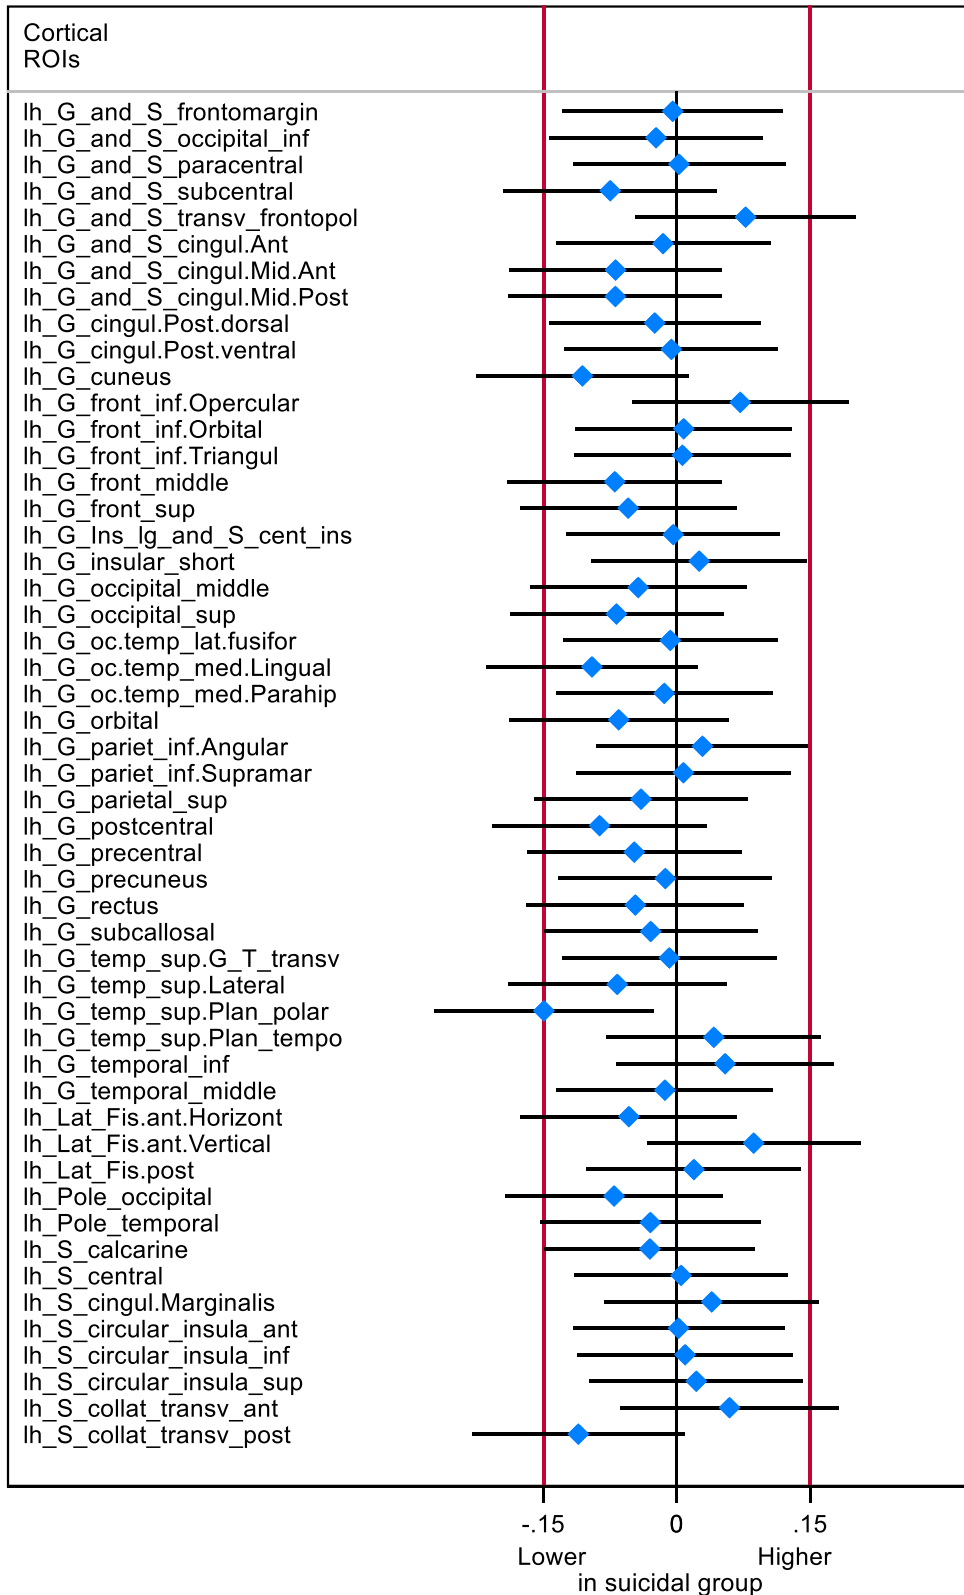

**eFigure 51 (1 of 3).** Results of the Equivalence test for differences in functional activity in cortical regions between the never-suicidal group and the caregiver-reported suicidality group for 2-back vs 0-back. The figure shows the effect sizes and 95% confidence intervals of the difference against the interval of equivalence (-0.15 to 0.15).

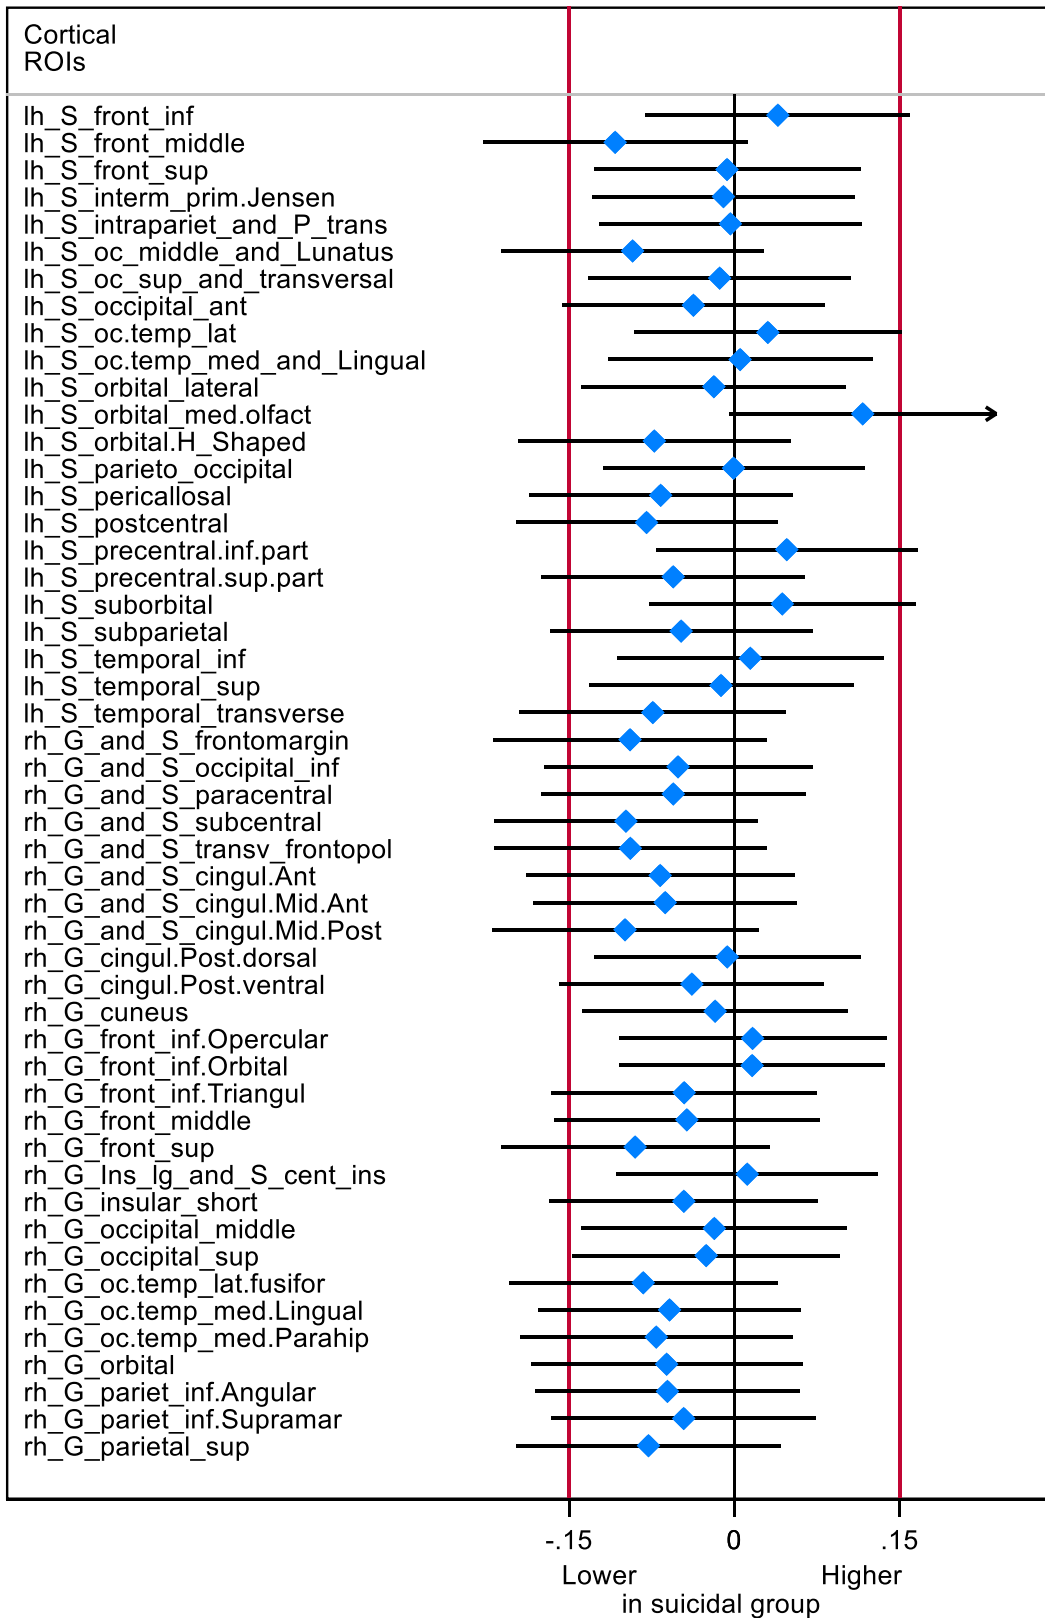

**eFigure 51 (2 of 3).** Results of the Equivalence test for differences in functional activity in cortical regions between the never-suicidal group and the caregiver-reported suicidality group for 2-back vs 0-back. The figure shows the effect sizes and 95% confidence intervals of the difference against the interval of equivalence (-0.15 to 0.15).

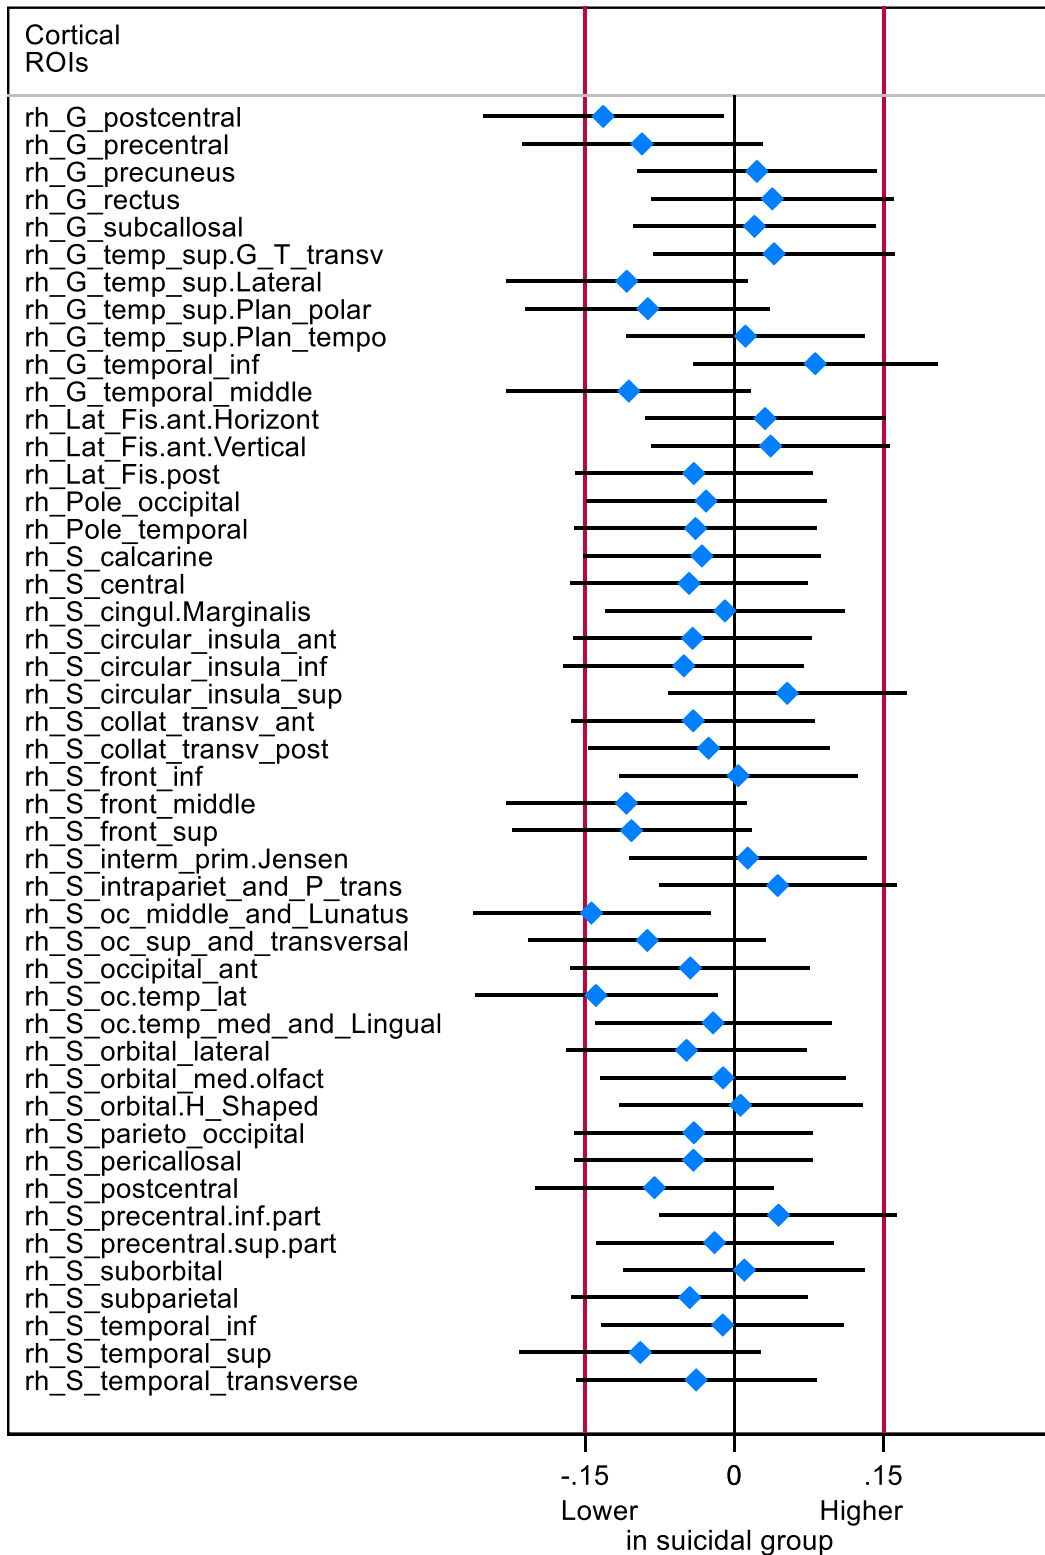

**eFigure 51 (3 of 3).** Results of the Equivalence test for differences in functional activity in cortical regions between the never-suicidal group and the caregiver-reported suicidality group for 2-back vs 0-back. The figure shows the effect sizes and 95% confidence intervals of the difference against the interval of equivalence (-0.15 to 0.15).

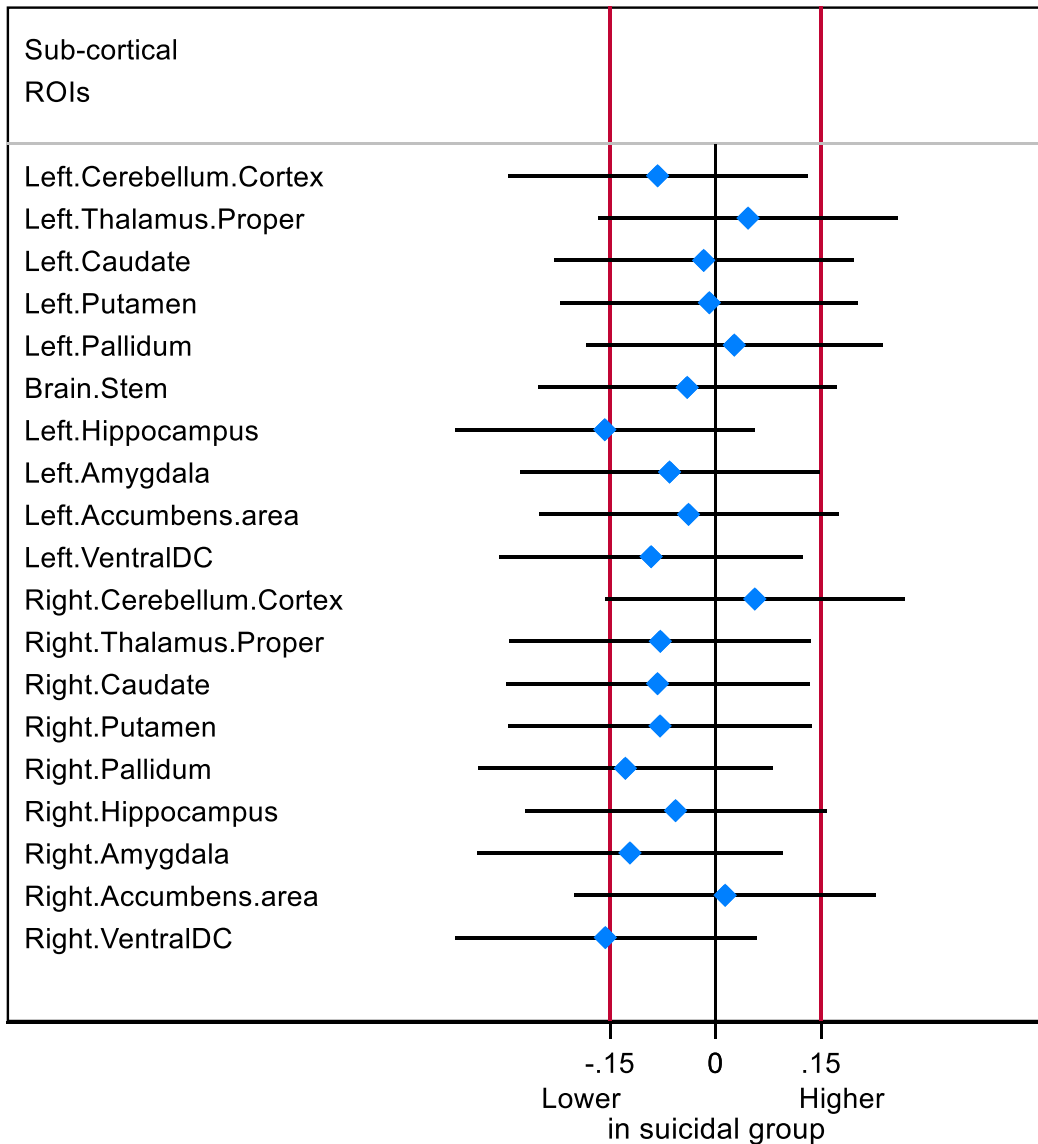

**eFigure 52.** Results of the Equivalence test for differences in functional activity in subcortical regions between the never-suicidal group and the concordantly-reported suicidality group for 2-back vs 0-back. The figure shows the effect sizes and 95% confidence intervals of the difference against the interval of equivalence (-0.15 to 0.15).

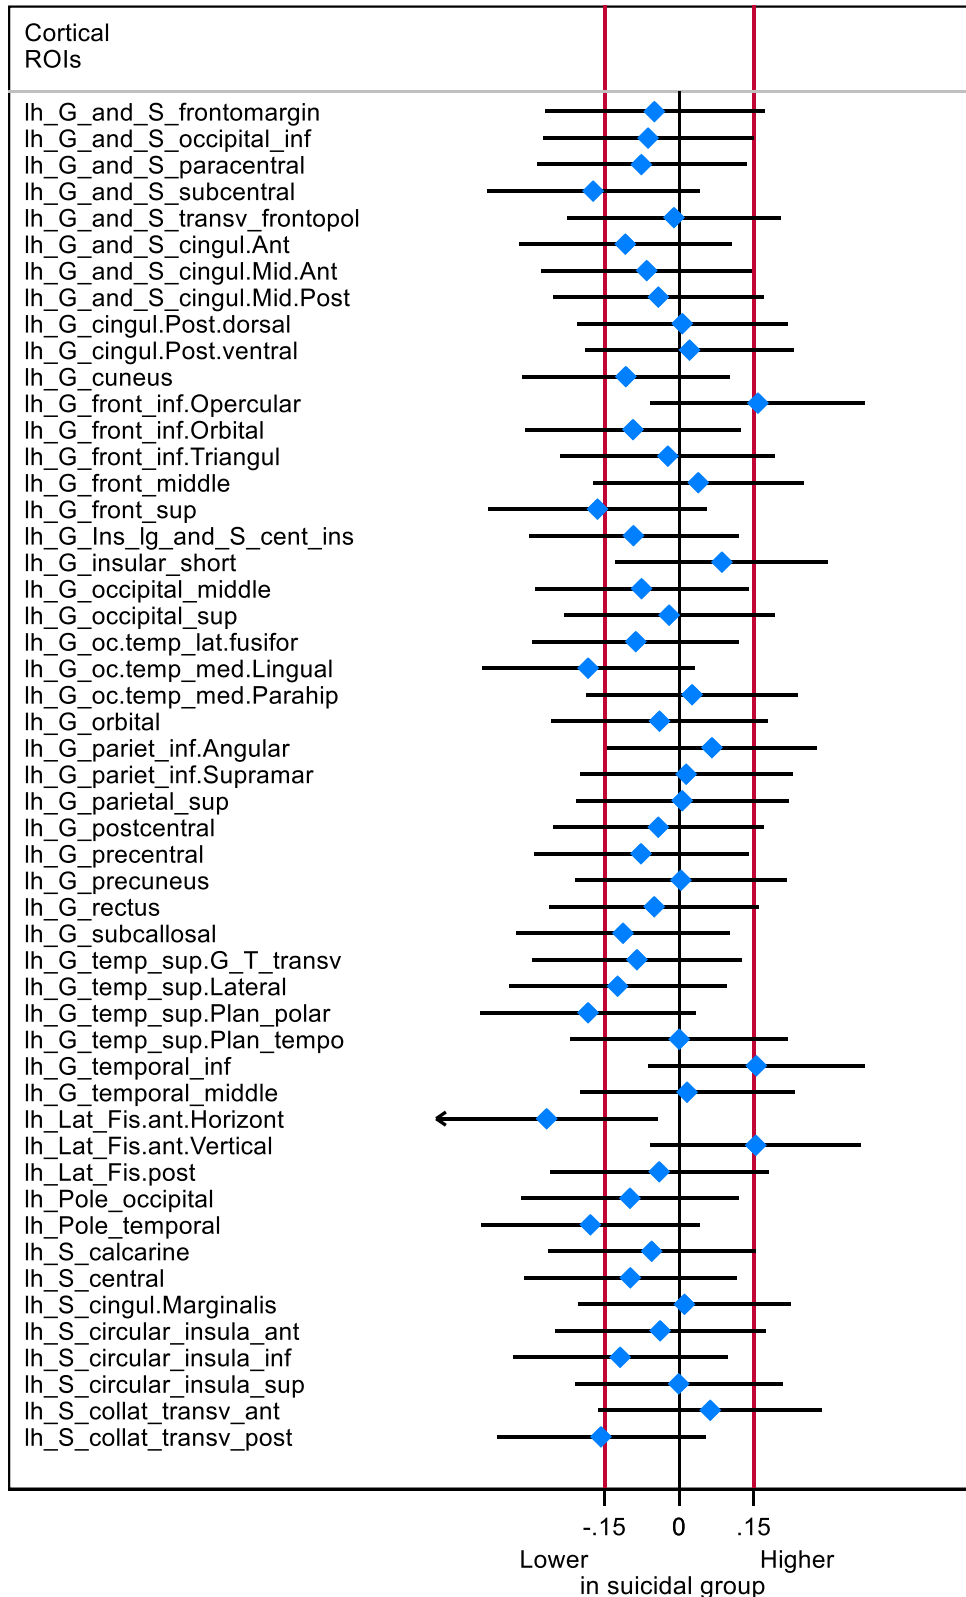

**eFigure 53 (1 of 3).** Results of the Equivalence test for differences in functional activity in cortical regions between the never-suicidal group and the concordantly-reported suicidality group for 2-back vs 0-back. The figure shows the effect sizes and 95% confidence intervals of the difference against the interval of equivalence (-0.15 to 0.15).

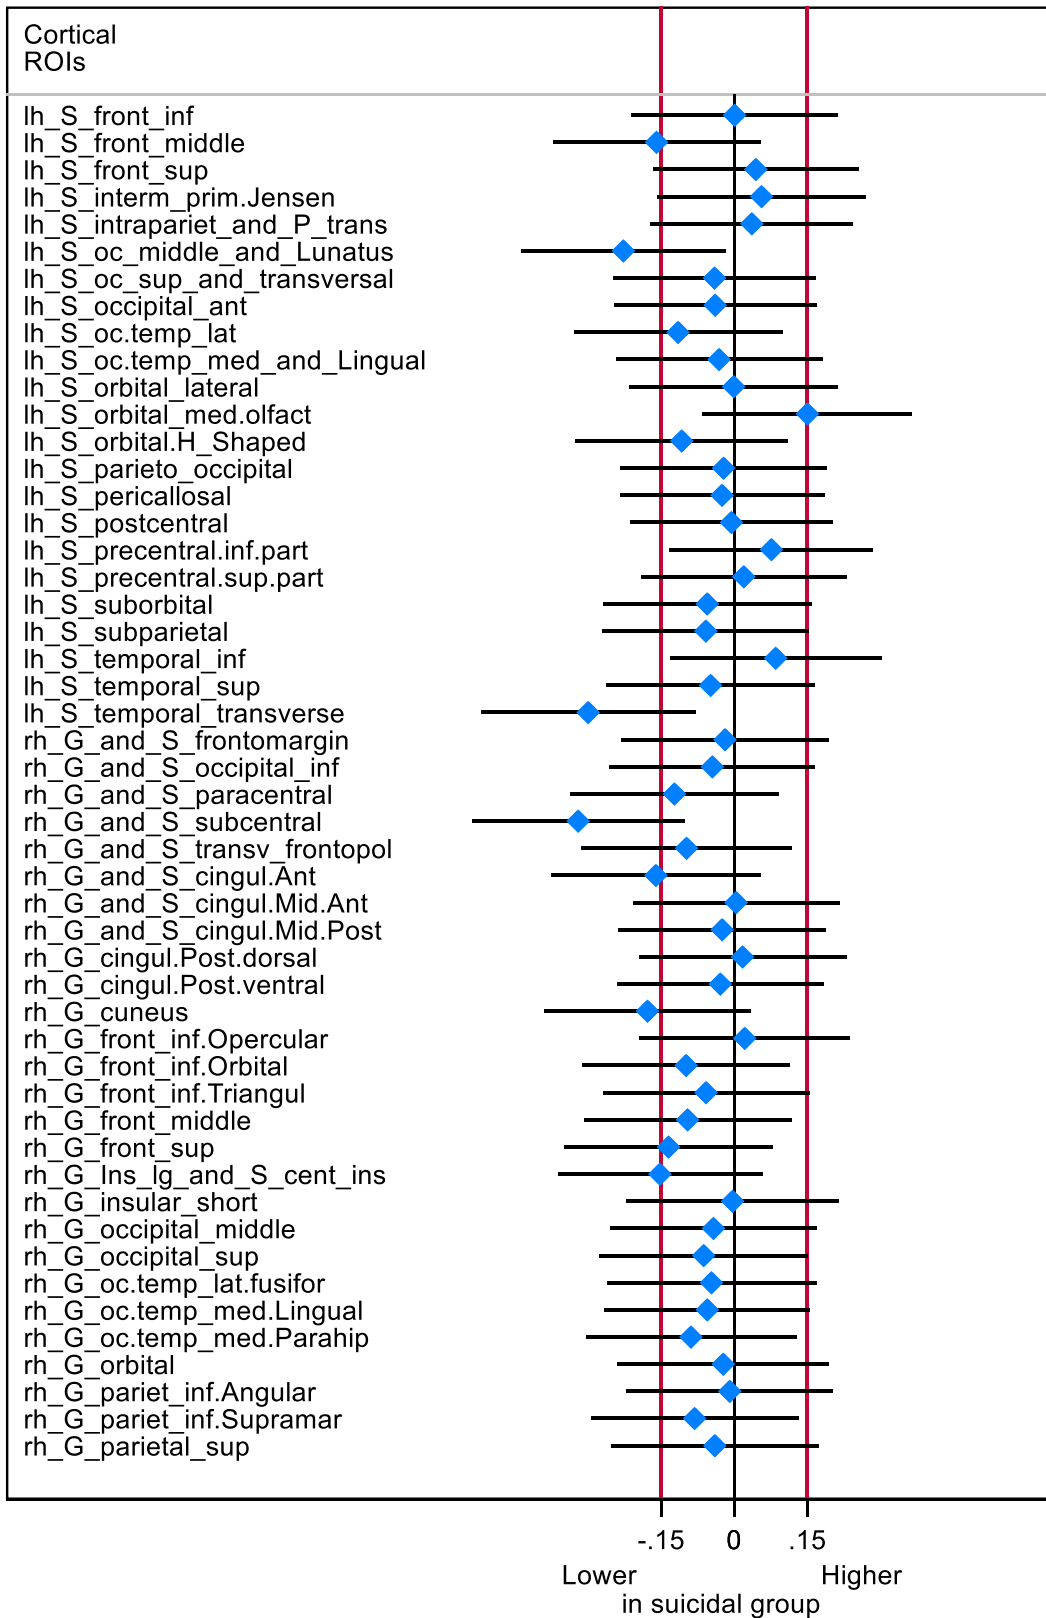

**eFigure 53 (2 of 3).** Results of the Equivalence test for differences in functional activity in cortical regions between the never-suicidal group and the concordantly-reported suicidality group for 2-back vs 0-back. The figure shows the effect sizes and 95% confidence intervals of the difference against the interval of equivalence (-0.15 to 0.15).



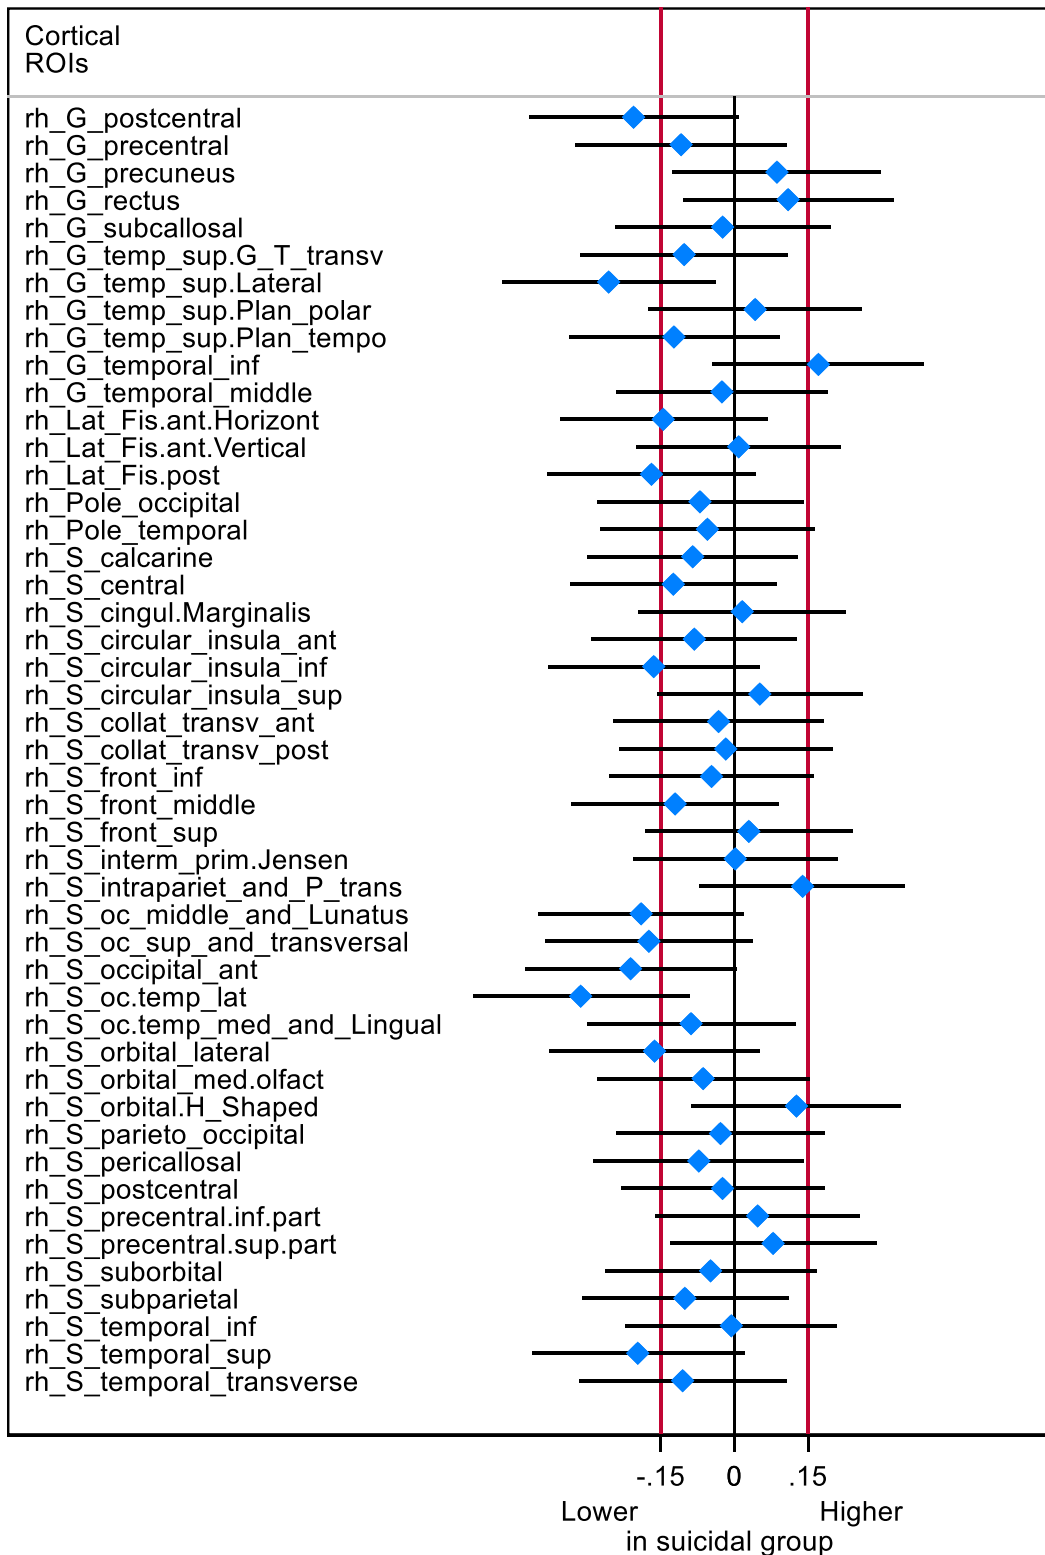

**eFigure 53 (3 of 3).** Results of the Equivalence test for differences in functional activity in cortical regions between the never-suicidal group and the concordantly-reported suicidality group for 2-back vs 0-back. The figure shows the effect sizes and 95% confidence intervals of the difference against the interval of equivalence (-0.15 to 0.15).

**Emotional vs neutral faces**

| <b>eTable 32. Differences in functional activity between the never-suicidal group and the child-reported suicidality group for emotional faces: Welch's t-test</b> |             |               |          |                |              |
|--------------------------------------------------------------------------------------------------------------------------------------------------------------------|-------------|---------------|----------|----------------|--------------|
| <b>ROIs</b>                                                                                                                                                        | <b>Mean</b> | <b>95%CI</b>  | <b>t</b> | <b>p (unc)</b> | <b>p FDR</b> |
| <b>Subcortical regions</b>                                                                                                                                         |             |               |          |                |              |
| Left.Cerebellum.Cortex                                                                                                                                             | -0.032      | -0.073, 0.009 | -1.53    | 0.127          | 0.922        |
| Left.Thalamus.Proper                                                                                                                                               | 0.001       | -0.019, 0.02  | 0.05     | 0.957          | 0.994        |
| Left.Caudate                                                                                                                                                       | -0.014      | -0.042, 0.013 | -1.02    | 0.310          | 0.993        |
| Left.Putamen                                                                                                                                                       | -0.001      | -0.026, 0.024 | -0.10    | 0.923          | 0.993        |
| Left.Pallidum                                                                                                                                                      | 0.011       | -0.01, 0.033  | 1.02     | 0.310          | 0.993        |
| Brain.Stem                                                                                                                                                         | -0.025      | -0.051, 0.001 | -1.90    | 0.059          | 0.875        |
| Left.Hippocampus                                                                                                                                                   | -0.020      | -0.041, 0.001 | -1.90    | 0.058          | 0.875        |
| Left.Amygdala                                                                                                                                                      | 0.005       | -0.022, 0.031 | 0.34     | 0.737          | 0.993        |
| Left.Accumbens.area                                                                                                                                                | -0.002      | -0.035, 0.031 | -0.10    | 0.918          | 0.993        |
| Left.VentralDC                                                                                                                                                     | -0.005      | -0.028, 0.019 | -0.39    | 0.697          | 0.993        |
| Right.Cerebellum.Cortex                                                                                                                                            | -0.006      | -0.045, 0.034 | -0.29    | 0.772          | 0.993        |
| Right.Thalamus.Proper                                                                                                                                              | -0.011      | -0.033, 0.012 | -0.94    | 0.347          | 0.993        |
| Right.Caudate                                                                                                                                                      | -0.013      | -0.041, 0.015 | -0.90    | 0.371          | 0.993        |
| Right.Putamen                                                                                                                                                      | -0.021      | -0.047, 0.005 | -1.62    | 0.107          | 0.875        |
| Right.Pallidum                                                                                                                                                     | -0.001      | -0.022, 0.021 | -0.08    | 0.937          | 0.994        |
| Right.Hippocampus                                                                                                                                                  | -0.005      | -0.027, 0.018 | -0.42    | 0.678          | 0.993        |
| Right.Amygdala                                                                                                                                                     | -0.009      | -0.037, 0.018 | -0.66    | 0.511          | 0.993        |
| Right.Accumbens.area                                                                                                                                               | -0.018      | -0.046, 0.01  | -1.28    | 0.201          | 0.993        |
| Right.VentralDC                                                                                                                                                    | -0.016      | -0.039, 0.008 | -1.29    | 0.197          | 0.993        |
| <b>Cortical regions</b>                                                                                                                                            |             |               |          |                |              |
| lh_G_and_S_frontomargin                                                                                                                                            | 0.003       | -0.05, 0.056  | 0.10     | 0.918          | 0.993        |
| lh_G_and_S_occipital_inf                                                                                                                                           | -0.024      | -0.068, 0.02  | -1.09    | 0.279          | 0.993        |
| lh_G_and_S_paracentral                                                                                                                                             | 0.001       | -0.024, 0.026 | 0.06     | 0.950          | 0.994        |
| lh_G_and_S_subcentral                                                                                                                                              | -0.025      | -0.053, 0.002 | -1.81    | 0.071          | 0.875        |
| lh_G_and_S_transv_frontopol                                                                                                                                        | -0.007      | -0.055, 0.041 | -0.29    | 0.772          | 0.993        |
| lh_G_and_S_cingul.Ant                                                                                                                                              | -0.002      | -0.029, 0.025 | -0.14    | 0.892          | 0.993        |
| lh_G_and_S_cingul.Mid.Ant                                                                                                                                          | -0.019      | -0.041, 0.004 | -1.64    | 0.102          | 0.875        |
| lh_G_and_S_cingul.Mid.Post                                                                                                                                         | 0.001       | -0.021, 0.022 | 0.06     | 0.951          | 0.994        |
| lh_G_cingul.Post.dorsal                                                                                                                                            | -0.009      | -0.035, 0.018 | -0.63    | 0.527          | 0.993        |
| lh_G_cingul.Post.ventral                                                                                                                                           | 0.026       | -0.026, 0.077 | 0.99     | 0.322          | 0.993        |
| lh_G_cuneus                                                                                                                                                        | -0.017      | -0.053, 0.02  | -0.90    | 0.370          | 0.993        |
| lh_G_front_inf.Opercular                                                                                                                                           | -0.014      | -0.038, 0.011 | -1.12    | 0.264          | 0.993        |
| lh_G_front_inf.Orbital                                                                                                                                             | -0.035      | -0.073, 0.004 | -1.77    | 0.078          | 0.875        |
| lh_G_front_inf.Triangul                                                                                                                                            | -0.001      | -0.034, 0.032 | -0.05    | 0.964          | 0.994        |
| lh_G_front_middle                                                                                                                                                  | -0.009      | -0.036, 0.018 | -0.64    | 0.524          | 0.993        |
| lh_G_front_sup                                                                                                                                                     | 0.006       | -0.013, 0.026 | 0.62     | 0.534          | 0.993        |
| lh_G_Ins_lg_and_S_cent_ins                                                                                                                                         | 0.003       | -0.022, 0.028 | 0.23     | 0.819          | 0.993        |

**eTable 32. Differences in functional activity between the never-suicidal group and the child-reported suicidality group for emotional faces: Welch's t-test**

| ROIs                         | Mean   | 95%CI          | t     | p (unc)      | p FDR |
|------------------------------|--------|----------------|-------|--------------|-------|
| lh_G_insular_short           | -0.005 | -0.027, 0.017  | -0.44 | 0.660        | 0.993 |
| lh_G_occipital_middle        | 0.005  | -0.024, 0.034  | 0.33  | 0.743        | 0.993 |
| lh_G_occipital_sup           | -0.003 | -0.034, 0.029  | -0.17 | 0.865        | 0.993 |
| lh_G_oc.temp_lat.fusifor     | -0.015 | -0.05, 0.02    | -0.86 | 0.393        | 0.993 |
| lh_G_oc.temp_med.Lingual     | -0.019 | -0.061, 0.024  | -0.86 | 0.390        | 0.993 |
| lh_G_oc.temp_med.Parahip     | 0.013  | -0.021, 0.046  | 0.75  | 0.455        | 0.993 |
| lh_G_orbital                 | -0.008 | -0.055, 0.04   | -0.31 | 0.755        | 0.993 |
| lh_G_pariet_inf.Angular      | 0.000  | -0.026, 0.027  | 0.03  | 0.973        | 0.994 |
| lh_G_pariet_inf.Supramar     | -0.013 | -0.036, 0.009  | -1.19 | 0.236        | 0.993 |
| lh_G_parietal_sup            | -0.002 | -0.027, 0.022  | -0.19 | 0.852        | 0.993 |
| lh_G_postcentral             | -0.010 | -0.036, 0.016  | -0.75 | 0.453        | 0.993 |
| lh_G_precentral              | -0.011 | -0.032, 0.009  | -1.11 | 0.266        | 0.993 |
| lh_G_precuneus               | 0.006  | -0.018, 0.031  | 0.50  | 0.615        | 0.993 |
| lh_G_rectus                  | -0.090 | -0.182, 0.003  | -1.91 | 0.057        | 0.875 |
| lh_G_subcallosal             | 0.017  | -0.026, 0.061  | 0.78  | 0.437        | 0.993 |
| lh_G_temp_sup.G_T_transv     | -0.007 | -0.036, 0.022  | -0.46 | 0.649        | 0.993 |
| lh_G_temp_sup.Lateral        | 0.001  | -0.021, 0.024  | 0.12  | 0.908        | 0.993 |
| lh_G_temp_sup.Plan_polar     | 0.017  | -0.004, 0.037  | 1.60  | 0.110        | 0.875 |
| lh_G_temp_sup.Plan_tempo     | -0.010 | -0.036, 0.015  | -0.80 | 0.425        | 0.993 |
| lh_G_temporal_inf            | 0.003  | -0.042, 0.047  | 0.12  | 0.907        | 0.993 |
| lh_G_temporal_middle         | -0.008 | -0.038, 0.023  | -0.49 | 0.628        | 0.993 |
| lh_Lat_Fis.ant.Horizontal    | -0.005 | -0.039, 0.029  | -0.29 | 0.769        | 0.993 |
| lh_Lat_Fis.ant.Vertical      | 0.024  | -0.011, 0.059  | 1.33  | 0.183        | 0.993 |
| lh_Lat_Fis.post              | -0.008 | -0.035, 0.019  | -0.59 | 0.553        | 0.993 |
| lh_Pole_occipital            | -0.005 | -0.06, 0.05    | -0.18 | 0.854        | 0.993 |
| lh_Pole_temporal             | -0.006 | -0.044, 0.032  | -0.32 | 0.751        | 0.993 |
| lh_S_calcarine               | 0.011  | -0.026, 0.047  | 0.58  | 0.562        | 0.993 |
| lh_S_central                 | 0.006  | -0.021, 0.032  | 0.41  | 0.681        | 0.993 |
| lh_S_cingul.Marginalis       | -0.006 | -0.026, 0.015  | -0.52 | 0.603        | 0.993 |
| lh_S_circular_insula_ant     | -0.037 | -0.067, -0.007 | -2.46 | <b>0.015</b> | 0.875 |
| lh_S_circular_insula_inf     | -0.017 | -0.04, 0.006   | -1.44 | 0.151        | 0.993 |
| lh_S_circular_insula_sup     | -0.021 | -0.046, 0.003  | -1.75 | 0.081        | 0.875 |
| lh_S_collat_transv_ant       | -0.018 | -0.063, 0.027  | -0.79 | 0.428        | 0.993 |
| lh_S_collat_transv_post      | -0.033 | -0.071, 0.005  | -1.72 | 0.087        | 0.875 |
| lh_S_front_inf               | -0.003 | -0.031, 0.024  | -0.25 | 0.803        | 0.993 |
| lh_S_front_middle            | -0.011 | -0.041, 0.018  | -0.75 | 0.455        | 0.993 |
| lh_S_front_sup               | -0.019 | -0.041, 0.003  | -1.69 | 0.093        | 0.875 |
| lh_S_interm_prim.Jensen      | -0.004 | -0.035, 0.026  | -0.28 | 0.782        | 0.993 |
| lh_S_intrapariet_and_P_trans | -0.011 | -0.036, 0.014  | -0.88 | 0.380        | 0.993 |
| lh_S_oc_middle_and_Lunatus   | -0.035 | -0.075, 0.004  | -1.76 | 0.080        | 0.875 |
| lh_S_oc_sup_and_transversal  | -0.016 | -0.048, 0.016  | -0.99 | 0.322        | 0.993 |
| lh_S_occipital_ant           | -0.014 | -0.04, 0.013   | -1.03 | 0.305        | 0.993 |
| lh_S_oc.temp_lat             | -0.038 | -0.064, -0.012 | -2.86 | <b>0.005</b> | 0.758 |

**eTable 32. Differences in functional activity between the never-suicidal group and the child-reported suicidality group for emotional faces: Welch's t-test**

| ROIs                         | Mean   | 95%CI         | t     | p (unc) | p FDR |
|------------------------------|--------|---------------|-------|---------|-------|
| lh_S_oc.temp_med_and_Lingual | -0.013 | -0.04, 0.015  | -0.91 | 0.364   | 0.993 |
| lh_S_orbital_lateral         | 0.009  | -0.035, 0.053 | 0.40  | 0.686   | 0.993 |
| lh_S_orbital_med.olfact      | -0.042 | -0.118, 0.034 | -1.08 | 0.281   | 0.993 |
| lh_S_orbital.H_Shaped        | -0.018 | -0.052, 0.017 | -1.00 | 0.316   | 0.993 |
| lh_S_parieto_occipital       | -0.003 | -0.029, 0.022 | -0.24 | 0.810   | 0.993 |
| lh_S_pericallosal            | -0.006 | -0.035, 0.023 | -0.42 | 0.673   | 0.993 |
| lh_S_postcentral             | -0.009 | -0.032, 0.013 | -0.80 | 0.425   | 0.993 |
| lh_S_precentral.inf.part     | -0.013 | -0.041, 0.015 | -0.90 | 0.368   | 0.993 |
| lh_S_precentral.sup.part     | -0.012 | -0.036, 0.012 | -0.98 | 0.326   | 0.993 |
| lh_S_suborbital              | -0.008 | -0.066, 0.051 | -0.25 | 0.799   | 0.993 |
| lh_S_subparietal             | 0.007  | -0.021, 0.034 | 0.48  | 0.630   | 0.993 |
| lh_S_temporal_inf            | 0.007  | -0.036, 0.049 | 0.32  | 0.747   | 0.993 |
| lh_S_temporal_sup            | -0.003 | -0.027, 0.02  | -0.27 | 0.786   | 0.993 |
| lh_S_temporal_transverse     | -0.004 | -0.039, 0.031 | -0.22 | 0.825   | 0.993 |
| rh_G_and_S_frontomargin      | -0.003 | -0.06, 0.055  | -0.09 | 0.927   | 0.993 |
| rh_G_and_S_occipital_inf     | -0.011 | -0.055, 0.034 | -0.48 | 0.633   | 0.993 |
| rh_G_and_S_paracentral       | -0.004 | -0.031, 0.023 | -0.27 | 0.784   | 0.993 |
| rh_G_and_S_subcentral        | 0.003  | -0.024, 0.03  | 0.21  | 0.837   | 0.993 |
| rh_G_and_S_transv_frontopol  | -0.005 | -0.047, 0.036 | -0.26 | 0.798   | 0.993 |
| rh_G_and_S_cingul.Ant        | -0.014 | -0.044, 0.015 | -0.97 | 0.332   | 0.993 |
| rh_G_and_S_cingul.Mid.Ant    | -0.020 | -0.043, 0.004 | -1.65 | 0.099   | 0.875 |
| rh_G_and_S_cingul.Mid.Post   | 0.004  | -0.017, 0.025 | 0.36  | 0.720   | 0.993 |
| rh_G_cingul.Post.dorsal      | -0.003 | -0.027, 0.021 | -0.24 | 0.810   | 0.993 |
| rh_G_cingul.Post.ventral     | -0.022 | -0.065, 0.021 | -1.00 | 0.318   | 0.993 |
| rh_G_cuneus                  | -0.019 | -0.055, 0.016 | -1.06 | 0.290   | 0.993 |
| rh_G_front_inf.Opercular     | -0.008 | -0.033, 0.018 | -0.59 | 0.559   | 0.993 |
| rh_G_front_inf.Orbital       | -0.015 | -0.055, 0.025 | -0.74 | 0.460   | 0.993 |
| rh_G_front_inf.Triangul      | -0.013 | -0.045, 0.019 | -0.81 | 0.418   | 0.993 |
| rh_G_front_middle            | 0.003  | -0.025, 0.031 | 0.22  | 0.829   | 0.993 |
| rh_G_front_sup               | 0.002  | -0.017, 0.021 | 0.17  | 0.864   | 0.993 |
| rh_G_Ins_lg_and_S_cent_ins   | 0.018  | -0.009, 0.046 | 1.32  | 0.186   | 0.993 |
| rh_G_insular_short           | -0.007 | -0.03, 0.016  | -0.60 | 0.547   | 0.993 |
| rh_G_occipital_middle        | 0.009  | -0.021, 0.039 | 0.58  | 0.566   | 0.993 |
| rh_G_occipital_sup           | 0.000  | -0.032, 0.033 | 0.02  | 0.986   | 0.994 |
| rh_G_oc.temp_lat.fusifor     | 0.002  | -0.036, 0.04  | 0.10  | 0.919   | 0.993 |
| rh_G_oc.temp_med.Lingual     | -0.024 | -0.067, 0.02  | -1.07 | 0.287   | 0.993 |
| rh_G_oc.temp_med.Parahip     | -0.016 | -0.055, 0.023 | -0.83 | 0.408   | 0.993 |
| rh_G_orbital                 | -0.021 | -0.071, 0.029 | -0.83 | 0.406   | 0.993 |
| rh_G_pariet_inf.Angular      | 0.008  | -0.017, 0.034 | 0.66  | 0.508   | 0.993 |
| rh_G_pariet_inf.Supramar     | -0.011 | -0.032, 0.011 | -0.99 | 0.324   | 0.993 |
| rh_G_parietal_sup            | -0.005 | -0.03, 0.02   | -0.39 | 0.694   | 0.993 |
| rh_G_postcentral             | -0.002 | -0.028, 0.023 | -0.19 | 0.847   | 0.993 |
| rh_G_precentral              | 0.003  | -0.017, 0.022 | 0.27  | 0.791   | 0.993 |

**eTable 32. Differences in functional activity between the never-suicidal group and the child-reported suicidality group for emotional faces: Welch's t-test**

| ROIs                         | Mean   | 95%CI          | t     | p (unc)      | p FDR |
|------------------------------|--------|----------------|-------|--------------|-------|
| rh_G_precuneus               | 0.004  | -0.023, 0.03   | 0.27  | 0.785        | 0.993 |
| rh_G_rectus                  | -0.105 | -0.219, 0.01   | -1.80 | 0.073        | 0.875 |
| rh_G_subcallosal             | 0.009  | -0.035, 0.054  | 0.41  | 0.680        | 0.993 |
| rh_G_temp_sup.G_T_transv     | -0.002 | -0.031, 0.027  | -0.14 | 0.892        | 0.993 |
| rh_G_temp_sup.Lateral        | -0.006 | -0.027, 0.016  | -0.52 | 0.603        | 0.993 |
| rh_G_temp_sup.Plan_polar     | 0.007  | -0.014, 0.028  | 0.66  | 0.508        | 0.993 |
| rh_G_temp_sup.Plan_tempo     | -0.015 | -0.04, 0.01    | -1.15 | 0.251        | 0.993 |
| rh_G_temporal_inf            | -0.040 | -0.086, 0.007  | -1.68 | 0.093        | 0.875 |
| rh_G_temporal_middle         | 0.004  | -0.023, 0.032  | 0.31  | 0.753        | 0.993 |
| rh_Lat_Fis.ant.Horizontal    | -0.005 | -0.037, 0.027  | -0.32 | 0.747        | 0.993 |
| rh_Lat_Fis.ant.Vertical      | -0.005 | -0.042, 0.032  | -0.26 | 0.797        | 0.993 |
| rh_Lat_Fis.post              | -0.003 | -0.032, 0.025  | -0.23 | 0.817        | 0.993 |
| rh_Pole_occipital            | -0.029 | -0.084, 0.025  | -1.05 | 0.293        | 0.993 |
| rh_Pole_temporal             | -0.011 | -0.054, 0.032  | -0.49 | 0.622        | 0.993 |
| rh_S_calcarine               | -0.012 | -0.05, 0.026   | -0.60 | 0.549        | 0.993 |
| rh_S_central                 | 0.010  | -0.018, 0.037  | 0.67  | 0.501        | 0.993 |
| rh_S_cingul.Marginalis       | -0.008 | -0.031, 0.014  | -0.72 | 0.470        | 0.993 |
| rh_S_circular_insula_ant     | -0.032 | -0.061, -0.002 | -2.11 | <b>0.036</b> | 0.875 |
| rh_S_circular_insula_inf     | -0.004 | -0.028, 0.02   | -0.34 | 0.737        | 0.993 |
| rh_S_circular_insula_sup     | -0.015 | -0.039, 0.01   | -1.18 | 0.239        | 0.993 |
| rh_S_collat_transv_ant       | -0.039 | -0.089, 0.011  | -1.53 | 0.126        | 0.922 |
| rh_S_collat_transv_post      | -0.023 | -0.059, 0.014  | -1.21 | 0.228        | 0.993 |
| rh_S_front_inf               | 0.000  | -0.029, 0.029  | -0.01 | 0.988        | 0.994 |
| rh_S_front_middle            | -0.027 | -0.058, 0.003  | -1.78 | 0.076        | 0.875 |
| rh_S_front_sup               | -0.009 | -0.032, 0.013  | -0.84 | 0.404        | 0.993 |
| rh_S_interm_prim.Jensen      | -0.017 | -0.046, 0.012  | -1.15 | 0.250        | 0.993 |
| rh_S_intrapariet_and_P_trans | 0.007  | -0.019, 0.034  | 0.54  | 0.588        | 0.993 |
| rh_S_oc_middle_and_Lunatus   | -0.034 | -0.07, 0.003   | -1.83 | 0.068        | 0.875 |
| rh_S_oc_sup_and_transversal  | 0.002  | -0.027, 0.031  | 0.13  | 0.895        | 0.993 |
| rh_S_occipital_ant           | -0.002 | -0.028, 0.024  | -0.17 | 0.865        | 0.993 |
| rh_S_oc.temp_lat             | -0.027 | -0.054, 0.001  | -1.92 | 0.056        | 0.875 |
| rh_S_oc.temp_med_and_Lingual | -0.010 | -0.039, 0.018  | -0.70 | 0.487        | 0.993 |
| rh_S_orbital_lateral         | 0.000  | -0.04, 0.04    | 0.00  | 1.000        | 1.000 |
| rh_S_orbital_med.olfact      | -0.051 | -0.131, 0.029  | -1.25 | 0.212        | 0.993 |
| rh_S_orbital.H_Shaped        | 0.003  | -0.035, 0.042  | 0.18  | 0.860        | 0.993 |
| rh_S_parieto_occipital       | 0.000  | -0.026, 0.026  | 0.03  | 0.978        | 0.994 |
| rh_S_pericallosal            | -0.011 | -0.043, 0.022  | -0.66 | 0.511        | 0.993 |
| rh_S_postcentral             | -0.013 | -0.035, 0.01   | -1.11 | 0.266        | 0.993 |
| rh_S_precentral.inf.part     | -0.003 | -0.031, 0.025  | -0.21 | 0.835        | 0.993 |
| rh_S_precentral.sup.part     | -0.015 | -0.038, 0.008  | -1.25 | 0.211        | 0.993 |
| rh_S_suborbital              | 0.007  | -0.085, 0.099  | 0.15  | 0.882        | 0.993 |
| rh_S_subparietal             | 0.006  | -0.022, 0.034  | 0.42  | 0.671        | 0.993 |
| rh_S_temporal_inf            | -0.005 | -0.049, 0.039  | -0.23 | 0.816        | 0.993 |

**eTable 32. Differences in functional activity between the never-suicidal group and the child-reported suicidality group for emotional faces: Welch's t-test**

| ROIs                     | Mean   | 95%CI         | t     | p (unc) | p FDR |
|--------------------------|--------|---------------|-------|---------|-------|
| rh_S_temporal_sup        | 0.000  | -0.023, 0.022 | -0.02 | 0.987   | 0.994 |
| rh_S_temporal_transverse | -0.012 | -0.048, 0.024 | -0.67 | 0.503   | 0.993 |

**Bold** denotes group differences at p<0.05 uncorrected

**eTable 33. Differences in functional activity between the never-suicidal group and the caregiver-reported suicidality group for emotional faces: Welch's t-test**

| ROIs                        | Mean   | 95%CI         | t     | p (unc)      | p FDR |
|-----------------------------|--------|---------------|-------|--------------|-------|
| <b>Subcortical regions</b>  |        |               |       |              |       |
| Left.Cerebellum.Cortex      | -0.012 | -0.052, 0.029 | -0.56 | 0.573        | 0.940 |
| Left.Thalamus.Proper        | 0.014  | -0.005, 0.034 | 1.44  | 0.151        | 0.773 |
| Left.Caudate                | 0.001  | -0.027, 0.029 | 0.06  | 0.954        | 0.960 |
| Left.Putamen                | 0.008  | -0.017, 0.033 | 0.62  | 0.536        | 0.940 |
| Left.Pallidum               | 0.016  | -0.006, 0.038 | 1.47  | 0.144        | 0.773 |
| Brain.Stem                  | -0.013 | -0.037, 0.011 | -1.05 | 0.293        | 0.843 |
| Left.Hippocampus            | -0.002 | -0.023, 0.02  | -0.14 | 0.888        | 0.940 |
| Left.Amygdala               | 0.020  | -0.008, 0.048 | 1.43  | 0.153        | 0.773 |
| Left.Accumbens.area         | 0.014  | -0.018, 0.046 | 0.87  | 0.384        | 0.916 |
| Left.VentralDC              | 0.012  | -0.014, 0.038 | 0.91  | 0.363        | 0.916 |
| Right.Cerebellum.Cortex     | 0.004  | -0.032, 0.039 | 0.19  | 0.846        | 0.940 |
| Right.Thalamus.Proper       | 0.020  | -0.001, 0.04  | 1.91  | 0.057        | 0.758 |
| Right.Caudate               | 0.004  | -0.025, 0.032 | 0.24  | 0.809        | 0.940 |
| Right.Putamen               | 0.004  | -0.021, 0.03  | 0.35  | 0.729        | 0.940 |
| Right.Pallidum              | 0.002  | -0.019, 0.024 | 0.22  | 0.825        | 0.940 |
| Right.Hippocampus           | 0.019  | -0.003, 0.042 | 1.68  | 0.094        | 0.773 |
| Right.Amygdala              | 0.019  | -0.011, 0.05  | 1.26  | 0.210        | 0.780 |
| Right.Accumbens.area        | 0.009  | -0.021, 0.039 | 0.60  | 0.548        | 0.940 |
| Right.VentralDC             | 0.018  | -0.006, 0.041 | 1.46  | 0.144        | 0.773 |
| <b>Cortical regions</b>     |        |               |       |              |       |
| lh_G_and_S_frontomargin     | -0.042 | -0.098, 0.014 | -1.49 | 0.137        | 0.773 |
| lh_G_and_S_occipital_inf    | -0.014 | -0.059, 0.032 | -0.60 | 0.551        | 0.940 |
| lh_G_and_S_paracentral      | 0.003  | -0.024, 0.031 | 0.25  | 0.801        | 0.940 |
| lh_G_and_S_subcentral       | 0.001  | -0.026, 0.029 | 0.10  | 0.918        | 0.940 |
| lh_G_and_S_transv_frontopol | 0.007  | -0.047, 0.061 | 0.26  | 0.793        | 0.940 |
| lh_G_and_S_cingul.Ant       | 0.011  | -0.017, 0.039 | 0.78  | 0.439        | 0.916 |
| lh_G_and_S_cingul.Mid.Ant   | -0.002 | -0.025, 0.021 | -0.20 | 0.842        | 0.940 |
| lh_G_and_S_cingul.Mid.Post  | 0.018  | -0.004, 0.04  | 1.64  | 0.101        | 0.773 |
| lh_G_cingul.Post.dorsal     | 0.028  | 0.001, 0.055  | 2.01  | <b>0.045</b> | 0.758 |
| lh_G_cingul.Post.ventral    | 0.056  | 0, 0.111      | 1.98  | <b>0.048</b> | 0.758 |

**eTable 33. Differences in functional activity between the never-suicidal group and the caregiver-reported suicidality group for emotional faces: Welch's t-test**

| ROIs                       | Mean   | 95%CI         | t     | p (unc)      | p FDR |
|----------------------------|--------|---------------|-------|--------------|-------|
| lh_G_cuneus                | 0.004  | -0.032, 0.04  | 0.21  | 0.837        | 0.940 |
| lh_G_front_inf.Opercular   | 0.000  | -0.025, 0.025 | 0.01  | 0.990        | 0.990 |
| lh_G_front_inf.Orbital     | -0.007 | -0.049, 0.034 | -0.35 | 0.726        | 0.940 |
| lh_G_front_inf.Triangul    | 0.003  | -0.031, 0.038 | 0.20  | 0.845        | 0.940 |
| lh_G_front_middle          | 0.016  | -0.009, 0.042 | 1.25  | 0.212        | 0.780 |
| lh_G_front_sup             | 0.013  | -0.006, 0.033 | 1.32  | 0.186        | 0.780 |
| lh_G_Ins_lg_and_S_cent_ins | 0.011  | -0.017, 0.038 | 0.75  | 0.455        | 0.926 |
| lh_G_insular_short         | 0.003  | -0.019, 0.025 | 0.24  | 0.813        | 0.940 |
| lh_G_occipital_middle      | -0.013 | -0.043, 0.017 | -0.84 | 0.402        | 0.916 |
| lh_G_occipital_sup         | 0.004  | -0.028, 0.036 | 0.26  | 0.794        | 0.940 |
| lh_G_oc.temp_lat.fusifor   | 0.013  | -0.023, 0.049 | 0.69  | 0.488        | 0.940 |
| lh_G_oc.temp_med.Lingual   | 0.021  | -0.021, 0.064 | 1.00  | 0.318        | 0.900 |
| lh_G_oc.temp_med.Parahip   | -0.003 | -0.037, 0.031 | -0.19 | 0.849        | 0.940 |
| lh_G_orbital               | 0.016  | -0.035, 0.066 | 0.62  | 0.539        | 0.940 |
| lh_G_pariet_inf.Angular    | 0.016  | -0.011, 0.044 | 1.17  | 0.242        | 0.809 |
| lh_G_pariet_inf.Supramar   | 0.014  | -0.008, 0.037 | 1.24  | 0.217        | 0.780 |
| lh_G_parietal_sup          | 0.002  | -0.024, 0.027 | 0.14  | 0.890        | 0.940 |
| lh_G_postcentral           | -0.003 | -0.028, 0.021 | -0.27 | 0.789        | 0.940 |
| lh_G_precentral            | 0.016  | -0.004, 0.036 | 1.57  | 0.117        | 0.773 |
| lh_G_precuneus             | 0.011  | -0.014, 0.035 | 0.87  | 0.387        | 0.916 |
| lh_G_rectus                | -0.050 | -0.142, 0.043 | -1.06 | 0.291        | 0.843 |
| lh_G_subcallosal           | 0.030  | -0.016, 0.075 | 1.28  | 0.200        | 0.780 |
| lh_G_temp_sup.G_T_transv   | 0.028  | -0.001, 0.056 | 1.91  | 0.057        | 0.758 |
| lh_G_temp_sup.Lateral      | 0.005  | -0.017, 0.028 | 0.47  | 0.642        | 0.940 |
| lh_G_temp_sup.Plan_polar   | -0.001 | -0.024, 0.021 | -0.11 | 0.911        | 0.940 |
| lh_G_temp_sup.Plan_tempo   | 0.015  | -0.012, 0.041 | 1.10  | 0.274        | 0.843 |
| lh_G_temporal_inf          | 0.030  | -0.018, 0.077 | 1.23  | 0.219        | 0.780 |
| lh_G_temporal_middle       | 0.007  | -0.022, 0.037 | 0.50  | 0.619        | 0.940 |
| lh_Lat_Fis.ant.Horizontal  | -0.010 | -0.046, 0.026 | -0.55 | 0.584        | 0.940 |
| lh_Lat_Fis.ant.Vertical    | 0.038  | 0.002, 0.074  | 2.09  | <b>0.037</b> | 0.758 |
| lh_Lat_Fis.post            | 0.011  | -0.017, 0.039 | 0.79  | 0.428        | 0.916 |
| lh_Pole_occipital          | -0.021 | -0.077, 0.036 | -0.72 | 0.474        | 0.931 |
| lh_Pole_temporal           | -0.002 | -0.041, 0.036 | -0.11 | 0.913        | 0.940 |
| lh_S_calcarine             | 0.026  | -0.012, 0.063 | 1.36  | 0.176        | 0.780 |
| lh_S_central               | 0.007  | -0.02, 0.034  | 0.50  | 0.619        | 0.940 |
| lh_S_cingul.Marginalis     | 0.006  | -0.015, 0.028 | 0.58  | 0.563        | 0.940 |
| lh_S_circular_insula_ant   | -0.018 | -0.05, 0.014  | -1.11 | 0.268        | 0.843 |
| lh_S_circular_insula_inf   | -0.006 | -0.03, 0.017  | -0.52 | 0.605        | 0.940 |
| lh_S_circular_insula_sup   | -0.018 | -0.042, 0.006 | -1.46 | 0.146        | 0.773 |
| lh_S_collat_transv_ant     | 0.033  | -0.014, 0.08  | 1.37  | 0.171        | 0.780 |
| lh_S_collat_transv_post    | 0.005  | -0.033, 0.043 | 0.26  | 0.798        | 0.940 |
| lh_S_front_inf             | 0.009  | -0.021, 0.04  | 0.61  | 0.546        | 0.940 |
| lh_S_front_middle          | -0.001 | -0.033, 0.03  | -0.08 | 0.933        | 0.951 |

**eTable 33. Differences in functional activity between the never-suicidal group and the caregiver-reported suicidality group for emotional faces: Welch's t-test**

| ROIs                         | Mean   | 95%CI         | t     | p (unc)      | p FDR |
|------------------------------|--------|---------------|-------|--------------|-------|
| lh_S_front_sup               | 0.006  | -0.016, 0.027 | 0.49  | 0.623        | 0.940 |
| lh_S_interm_prim.Jensen      | 0.027  | -0.005, 0.059 | 1.65  | 0.100        | 0.773 |
| lh_S_intrapariet_and_P_trans | 0.014  | -0.011, 0.038 | 1.08  | 0.283        | 0.843 |
| lh_S_oc_middle_and_Lunatus   | 0.001  | -0.04, 0.043  | 0.06  | 0.949        | 0.960 |
| lh_S_oc_sup_and_transversal  | 0.006  | -0.026, 0.038 | 0.35  | 0.726        | 0.940 |
| lh_S_occipital_ant           | 0.010  | -0.017, 0.037 | 0.72  | 0.474        | 0.931 |
| lh_S_oc.temp_lat             | 0.010  | -0.019, 0.039 | 0.66  | 0.508        | 0.940 |
| lh_S_oc.temp_med_and_Lingual | 0.023  | -0.004, 0.05  | 1.69  | 0.091        | 0.773 |
| lh_S_orbital_lateral         | 0.050  | 0.003, 0.097  | 2.11  | <b>0.036</b> | 0.758 |
| lh_S_orbital_med.olfact      | 0.030  | -0.051, 0.111 | 0.73  | 0.464        | 0.931 |
| lh_S_orbital.H_Shaped        | 0.004  | -0.034, 0.041 | 0.20  | 0.839        | 0.940 |
| lh_S_parieto_occipital       | 0.021  | -0.004, 0.047 | 1.63  | 0.103        | 0.773 |
| lh_S_pericallosal            | 0.024  | -0.004, 0.051 | 1.66  | 0.097        | 0.773 |
| lh_S_postcentral             | 0.007  | -0.015, 0.029 | 0.62  | 0.533        | 0.940 |
| lh_S_precentral.inf.part     | 0.031  | 0.003, 0.06   | 2.16  | <b>0.032</b> | 0.758 |
| lh_S_precentral.sup.part     | 0.016  | -0.008, 0.041 | 1.32  | 0.188        | 0.780 |
| lh_S_suborbital              | 0.027  | -0.035, 0.09  | 0.86  | 0.393        | 0.916 |
| lh_S_subparietal             | 0.030  | 0.002, 0.059  | 2.09  | <b>0.037</b> | 0.758 |
| lh_S_temporal_inf            | 0.040  | -0.002, 0.082 | 1.89  | 0.059        | 0.758 |
| lh_S_temporal_sup            | 0.022  | -0.003, 0.046 | 1.74  | 0.083        | 0.773 |
| lh_S_temporal_transverse     | 0.050  | 0.016, 0.084  | 2.89  | <b>0.004</b> | 0.691 |
| rh_G_and_S_frontomargin      | -0.026 | -0.083, 0.03  | -0.92 | 0.360        | 0.916 |
| rh_G_and_S_occipital_inf     | 0.017  | -0.026, 0.061 | 0.78  | 0.439        | 0.916 |
| rh_G_and_S_paracentral       | -0.002 | -0.03, 0.026  | -0.12 | 0.905        | 0.940 |
| rh_G_and_S_subcentral        | 0.015  | -0.011, 0.041 | 1.11  | 0.269        | 0.843 |
| rh_G_and_S_transv_frontopol  | 0.012  | -0.034, 0.057 | 0.50  | 0.620        | 0.940 |
| rh_G_and_S_cingul.Ant        | -0.007 | -0.037, 0.023 | -0.48 | 0.632        | 0.940 |
| rh_G_and_S_cingul.Mid.Ant    | -0.005 | -0.027, 0.018 | -0.42 | 0.676        | 0.940 |
| rh_G_and_S_cingul.Mid.Post   | 0.009  | -0.013, 0.031 | 0.81  | 0.418        | 0.916 |
| rh_G_cingul.Post.dorsal      | 0.030  | 0.003, 0.057  | 2.22  | <b>0.027</b> | 0.758 |
| rh_G_cingul.Post.ventral     | 0.030  | -0.014, 0.074 | 1.35  | 0.179        | 0.780 |
| rh_G_cuneus                  | 0.014  | -0.022, 0.05  | 0.76  | 0.445        | 0.918 |
| rh_G_front_inf.Opercular     | 0.005  | -0.02, 0.031  | 0.42  | 0.677        | 0.940 |
| rh_G_front_inf.Orbital       | -0.002 | -0.041, 0.037 | -0.11 | 0.915        | 0.940 |
| rh_G_front_inf.Triangul      | 0.008  | -0.026, 0.042 | 0.44  | 0.659        | 0.940 |
| rh_G_front_middle            | 0.005  | -0.023, 0.034 | 0.37  | 0.708        | 0.940 |
| rh_G_front_sup               | -0.002 | -0.022, 0.018 | -0.19 | 0.848        | 0.940 |
| rh_G_Ins_lg_and_S_cent_ins   | 0.026  | -0.001, 0.052 | 1.89  | 0.059        | 0.758 |
| rh_G_insular_short           | 0.003  | -0.02, 0.026  | 0.23  | 0.818        | 0.940 |
| rh_G_occipital_middle        | 0.018  | -0.011, 0.047 | 1.21  | 0.227        | 0.788 |
| rh_G_occipital_sup           | 0.008  | -0.022, 0.039 | 0.54  | 0.587        | 0.940 |
| rh_G_oc.temp_lat.fusifor     | 0.011  | -0.028, 0.049 | 0.55  | 0.583        | 0.940 |
| rh_G_oc.temp_med.Lingual     | 0.034  | -0.008, 0.077 | 1.59  | 0.112        | 0.773 |



**eTable 33. Differences in functional activity between the never-suicidal group and the caregiver-reported suicidality group for emotional faces: Welch's t-test**

| ROIs                         | Mean   | 95%CI         | t     | p (unc)      | p FDR |
|------------------------------|--------|---------------|-------|--------------|-------|
| rh_G_oc.temp_med.Parahip     | -0.013 | -0.049, 0.023 | -0.69 | 0.493        | 0.940 |
| rh_G_orbital                 | -0.003 | -0.053, 0.047 | -0.12 | 0.904        | 0.940 |
| rh_G_pariet_inf.Angular      | 0.011  | -0.016, 0.037 | 0.79  | 0.429        | 0.916 |
| rh_G_pariet_inf.Supramar     | 0.007  | -0.015, 0.029 | 0.63  | 0.526        | 0.940 |
| rh_G_parietal_sup            | 0.006  | -0.018, 0.03  | 0.50  | 0.620        | 0.940 |
| rh_G_postcentral             | -0.001 | -0.025, 0.023 | -0.12 | 0.908        | 0.940 |
| rh_G_precentral              | 0.002  | -0.016, 0.021 | 0.23  | 0.817        | 0.940 |
| rh_G_precuneus               | 0.012  | -0.013, 0.037 | 0.94  | 0.349        | 0.916 |
| rh_G_rectus                  | -0.054 | -0.178, 0.071 | -0.85 | 0.395        | 0.916 |
| rh_G_subcallosal             | 0.015  | -0.03, 0.06   | 0.67  | 0.501        | 0.940 |
| rh_G_temp_sup.G_T_transv     | 0.002  | -0.028, 0.032 | 0.16  | 0.875        | 0.940 |
| rh_G_temp_sup.Lateral        | -0.005 | -0.028, 0.018 | -0.41 | 0.679        | 0.940 |
| rh_G_temp_sup.Plan_polar     | -0.008 | -0.03, 0.015  | -0.67 | 0.506        | 0.940 |
| rh_G_temp_sup.Plan_tempo     | 0.034  | 0.009, 0.059  | 2.65  | <b>0.008</b> | 0.709 |
| rh_G_temporal_inf            | -0.007 | -0.057, 0.043 | -0.28 | 0.778        | 0.940 |
| rh_G_temporal_middle         | 0.012  | -0.019, 0.043 | 0.78  | 0.435        | 0.916 |
| rh_Lat_Fis.ant.Horizontal    | -0.026 | -0.06, 0.007  | -1.54 | 0.124        | 0.773 |
| rh_Lat_Fis.ant.Vertical      | -0.009 | -0.048, 0.029 | -0.48 | 0.631        | 0.940 |
| rh_Lat_Fis.post              | 0.005  | -0.023, 0.033 | 0.36  | 0.718        | 0.940 |
| rh_Pole_occipital            | 0.024  | -0.03, 0.077  | 0.88  | 0.382        | 0.916 |
| rh_Pole_temporal             | -0.028 | -0.071, 0.015 | -1.27 | 0.206        | 0.780 |
| rh_S_calcarine               | 0.018  | -0.02, 0.057  | 0.93  | 0.354        | 0.916 |
| rh_S_central                 | -0.003 | -0.03, 0.025  | -0.18 | 0.855        | 0.940 |
| rh_S_cingul.Marginalis       | 0.014  | -0.009, 0.036 | 1.18  | 0.238        | 0.809 |
| rh_S_circular_insula_ant     | -0.013 | -0.043, 0.017 | -0.83 | 0.406        | 0.916 |
| rh_S_circular_insula_inf     | 0.003  | -0.021, 0.028 | 0.25  | 0.804        | 0.940 |
| rh_S_circular_insula_sup     | 0.004  | -0.02, 0.028  | 0.30  | 0.763        | 0.940 |
| rh_S_collat_transv_ant       | 0.020  | -0.03, 0.069  | 0.79  | 0.431        | 0.916 |
| rh_S_collat_transv_post      | 0.016  | -0.022, 0.055 | 0.82  | 0.410        | 0.916 |
| rh_S_front_inf               | 0.006  | -0.026, 0.038 | 0.37  | 0.712        | 0.940 |
| rh_S_front_middle            | -0.002 | -0.031, 0.028 | -0.11 | 0.911        | 0.940 |
| rh_S_front_sup               | 0.007  | -0.017, 0.031 | 0.59  | 0.557        | 0.940 |
| rh_S_interm_prim.Jensen      | -0.005 | -0.032, 0.022 | -0.39 | 0.699        | 0.940 |
| rh_S_intrapariet_and_P_trans | 0.002  | -0.023, 0.026 | 0.13  | 0.898        | 0.940 |
| rh_S_oc_middle_and_Lunatus   | -0.007 | -0.046, 0.032 | -0.34 | 0.733        | 0.940 |
| rh_S_oc_sup_and_transversal  | 0.016  | -0.013, 0.045 | 1.07  | 0.283        | 0.843 |
| rh_S_occipital_ant           | 0.024  | -0.004, 0.051 | 1.70  | 0.090        | 0.773 |
| rh_S_oc.temp_lat             | 0.002  | -0.025, 0.03  | 0.18  | 0.860        | 0.940 |
| rh_S_oc.temp_med_and_Lingual | 0.020  | -0.009, 0.048 | 1.37  | 0.171        | 0.780 |
| rh_S_orbital_lateral         | 0.008  | -0.034, 0.051 | 0.39  | 0.695        | 0.940 |
| rh_S_orbital_med.olfact      | 0.021  | -0.061, 0.103 | 0.50  | 0.617        | 0.940 |
| rh_S_orbital.H_Shaped        | 0.008  | -0.033, 0.048 | 0.38  | 0.704        | 0.940 |
| rh_S_parieto_occipital       | 0.020  | -0.006, 0.045 | 1.52  | 0.129        | 0.773 |

**eTable 33. Differences in functional activity between the never-suicidal group and the caregiver-reported suicidality group for emotional faces: Welch's t-test**

| ROIs                     | Mean   | 95%CI         | t     | p (unc) | p FDR |
|--------------------------|--------|---------------|-------|---------|-------|
| rh_S_pericallosal        | 0.029  | -0.005, 0.063 | 1.70  | 0.090   | 0.773 |
| rh_S_postcentral         | 0.009  | -0.013, 0.031 | 0.78  | 0.434   | 0.916 |
| rh_S_precentral.inf.part | 0.014  | -0.016, 0.045 | 0.94  | 0.348   | 0.916 |
| rh_S_precentral.sup.part | 0.004  | -0.019, 0.027 | 0.34  | 0.735   | 0.940 |
| rh_S_suborbital          | 0.071  | -0.02, 0.161  | 1.54  | 0.125   | 0.773 |
| rh_S_subparietal         | 0.016  | -0.013, 0.044 | 1.09  | 0.277   | 0.843 |
| rh_S_temporal_inf        | -0.029 | -0.074, 0.017 | -1.24 | 0.215   | 0.780 |
| rh_S_temporal_sup        | 0.016  | -0.008, 0.04  | 1.34  | 0.182   | 0.780 |
| rh_S_temporal_transverse | 0.008  | -0.028, 0.043 | 0.42  | 0.671   | 0.940 |

**Bold** denotes group differences at p<0.05 uncorrected

**eTable 34. Differences in functional activity between the never-suicidal group and the concordantly-reported suicidality group for emotional faces: Welch's t-test**

| ROIs                       | Mean   | 95%CI          | t     | p (unc)      | p FDR |
|----------------------------|--------|----------------|-------|--------------|-------|
| <b>Subcortical regions</b> |        |                |       |              |       |
| Left.Cerebellum.Cortex     | -0.050 | -0.122, 0.022  | -1.38 | 0.170        | 0.754 |
| Left.Thalamus.Proper       | 0.006  | -0.026, 0.038  | 0.36  | 0.717        | 0.975 |
| Left.Caudate               | -0.036 | -0.078, 0.006  | -1.69 | 0.095        | 0.735 |
| Left.Putamen               | -0.005 | -0.051, 0.041  | -0.23 | 0.820        | 0.976 |
| Left.Pallidum              | 0.009  | -0.033, 0.052  | 0.43  | 0.670        | 0.975 |
| Brain.Stem                 | -0.039 | -0.082, 0.004  | -1.80 | 0.074        | 0.730 |
| Left.Hippocampus           | -0.029 | -0.065, 0.008  | -1.56 | 0.122        | 0.735 |
| Left.Amygdala              | 0.030  | -0.018, 0.078  | 1.23  | 0.221        | 0.821 |
| Left.Accumbens.area        | 0.009  | -0.049, 0.067  | 0.30  | 0.766        | 0.975 |
| Left.VentralDC             | 0.009  | -0.035, 0.052  | 0.40  | 0.693        | 0.975 |
| Right.Cerebellum.Cortex    | -0.036 | -0.105, 0.032  | -1.05 | 0.295        | 0.898 |
| Right.Thalamus.Proper      | 0.005  | -0.028, 0.038  | 0.31  | 0.757        | 0.975 |
| Right.Caudate              | -0.029 | -0.075, 0.016  | -1.28 | 0.205        | 0.796 |
| Right.Putamen              | -0.039 | -0.081, 0.004  | -1.82 | 0.073        | 0.730 |
| Right.Pallidum             | -0.024 | -0.058, 0.01   | -1.40 | 0.165        | 0.754 |
| Right.Hippocampus          | 0.015  | -0.026, 0.055  | 0.71  | 0.477        | 0.960 |
| Right.Amygdala             | 0.028  | -0.02, 0.077   | 1.16  | 0.249        | 0.868 |
| Right.Accumbens.area       | -0.046 | -0.089, -0.004 | -2.17 | <b>0.032</b> | 0.492 |
| Right.VentralDC            | -0.009 | -0.05, 0.032   | -0.42 | 0.675        | 0.975 |
| <b>Cortical regions</b>    |        |                |       |              |       |
| lh_G_and_S_frontomargin    | -0.094 | -0.169, -0.019 | -2.48 | <b>0.015</b> | 0.492 |
| lh_G_and_S_occipital_inf   | -0.031 | -0.115, 0.053  | -0.74 | 0.462        | 0.960 |
| lh_G_and_S_paracentral     | -0.012 | -0.053, 0.028  | -0.60 | 0.548        | 0.975 |

**eTable 34. Differences in functional activity between the never-suicidal group and the concordantly-reported suicidality group for emotional faces: Welch's t-test**

| ROIs                        | Mean   | 95%CI          | t     | p (unc)      | p FDR |
|-----------------------------|--------|----------------|-------|--------------|-------|
| lh_G_and_S_subcentral       | -0.020 | -0.068, 0.029  | -0.80 | 0.426        | 0.924 |
| lh_G_and_S_transv_frontopol | -0.088 | -0.179, 0.004  | -1.90 | 0.060        | 0.669 |
| lh_G_and_S_cingul.Ant       | -0.004 | -0.047, 0.04   | -0.17 | 0.865        | 0.980 |
| lh_G_and_S_cingul.Mid.Ant   | -0.042 | -0.081, -0.004 | -2.20 | <b>0.030</b> | 0.492 |
| lh_G_and_S_cingul.Mid.Post  | 0.001  | -0.037, 0.038  | 0.05  | 0.962        | 0.992 |
| lh_G_cingul.Post.dorsal     | 0.014  | -0.028, 0.057  | 0.67  | 0.507        | 0.962 |
| lh_G_cingul.Post.ventral    | 0.037  | -0.055, 0.128  | 0.80  | 0.425        | 0.924 |
| lh_G_cuneus                 | -0.041 | -0.102, 0.019  | -1.36 | 0.176        | 0.754 |
| lh_G_front_inf.Opercular    | -0.032 | -0.072, 0.009  | -1.55 | 0.124        | 0.735 |
| lh_G_front_inf.Orbital      | -0.066 | -0.131, -0.001 | -2.02 | <b>0.047</b> | 0.639 |
| lh_G_front_inf.Triangul     | -0.018 | -0.078, 0.041  | -0.60 | 0.548        | 0.975 |
| lh_G_front_middle           | -0.011 | -0.053, 0.031  | -0.53 | 0.600        | 0.975 |
| lh_G_front_sup              | 0.003  | -0.028, 0.035  | 0.21  | 0.835        | 0.976 |
| lh_G_Ins_lg_and_S_cent_ins  | 0.010  | -0.034, 0.054  | 0.44  | 0.658        | 0.975 |
| lh_G_insular_short          | -0.018 | -0.054, 0.018  | -1.00 | 0.318        | 0.898 |
| lh_G_occipital_middle       | -0.002 | -0.057, 0.054  | -0.05 | 0.956        | 0.992 |
| lh_G_occipital_sup          | -0.027 | -0.084, 0.031  | -0.93 | 0.357        | 0.898 |
| lh_G_oc.temp_lat.fusifor    | -0.042 | -0.099, 0.015  | -1.45 | 0.150        | 0.735 |
| lh_G_oc.temp_med.Lingual    | -0.036 | -0.101, 0.028  | -1.11 | 0.270        | 0.892 |
| lh_G_oc.temp_med.Parahip    | -0.036 | -0.094, 0.022  | -1.24 | 0.220        | 0.821 |
| lh_G_orbital                | -0.035 | -0.109, 0.039  | -0.93 | 0.353        | 0.898 |
| lh_G_pariet_inf.Angular     | 0.000  | -0.05, 0.05    | 0.01  | 0.992        | 0.992 |
| lh_G_pariet_inf.Supramar    | -0.013 | -0.051, 0.025  | -0.67 | 0.507        | 0.962 |
| lh_G_parietal_sup           | -0.025 | -0.07, 0.02    | -1.12 | 0.266        | 0.892 |
| lh_G_postcentral            | -0.010 | -0.051, 0.032  | -0.46 | 0.646        | 0.975 |
| lh_G_precentral             | 0.000  | -0.034, 0.034  | -0.02 | 0.984        | 0.992 |
| lh_G_precuneus              | -0.001 | -0.041, 0.038  | -0.07 | 0.941        | 0.992 |
| lh_G_rectus                 | -0.121 | -0.273, 0.031  | -1.57 | 0.119        | 0.735 |
| lh_G_subcallosal            | 0.010  | -0.066, 0.086  | 0.26  | 0.797        | 0.976 |
| lh_G_temp_sup.G_T_transv    | 0.007  | -0.047, 0.061  | 0.25  | 0.800        | 0.976 |
| lh_G_temp_sup.Lateral       | -0.001 | -0.038, 0.037  | -0.03 | 0.973        | 0.992 |
| lh_G_temp_sup.Plan_polar    | 0.029  | -0.007, 0.065  | 1.63  | 0.108        | 0.735 |
| lh_G_temp_sup.Plan_tempo    | -0.023 | -0.066, 0.019  | -1.08 | 0.284        | 0.898 |
| lh_G_temporal_inf           | 0.004  | -0.078, 0.087  | 0.10  | 0.922        | 0.992 |
| lh_G_temporal_middle        | -0.040 | -0.093, 0.012  | -1.53 | 0.129        | 0.735 |
| lh_Lat_Fis.ant.Horizontal   | -0.041 | -0.099, 0.017  | -1.41 | 0.161        | 0.754 |
| lh_Lat_Fis.ant.Vertical     | 0.031  | -0.03, 0.093   | 1.02  | 0.311        | 0.898 |
| lh_Lat_Fis.post             | 0.005  | -0.046, 0.056  | 0.20  | 0.841        | 0.976 |
| lh_Pole_occipital           | 0.034  | -0.059, 0.127  | 0.72  | 0.472        | 0.960 |
| lh_Pole_temporal            | -0.032 | -0.1, 0.035    | -0.94 | 0.347        | 0.898 |
| lh_S_calcarine              | 0.024  | -0.043, 0.09   | 0.70  | 0.483        | 0.960 |
| lh_S_central                | 0.020  | -0.029, 0.07   | 0.81  | 0.420        | 0.924 |
| lh_S_cingul.Marginalis      | -0.006 | -0.04, 0.028   | -0.36 | 0.718        | 0.975 |

**eTable 34. Differences in functional activity between the never-suicidal group and the concordantly-reported suicidality group for emotional faces: Welch's t-test**

| ROIs                         | Mean   | 95%CI          | t     | p (unc)      | p FDR |
|------------------------------|--------|----------------|-------|--------------|-------|
| lh_S_circular_insula_ant     | -0.074 | -0.128, -0.02  | -2.71 | <b>0.008</b> | 0.449 |
| lh_S_circular_insula_inf     | -0.027 | -0.069, 0.015  | -1.28 | 0.203        | 0.796 |
| lh_S_circular_insula_sup     | -0.019 | -0.061, 0.023  | -0.89 | 0.378        | 0.898 |
| lh_S_collat_transv_ant       | -0.024 | -0.106, 0.059  | -0.57 | 0.569        | 0.975 |
| lh_S_collat_transv_post      | -0.001 | -0.068, 0.066  | -0.03 | 0.975        | 0.992 |
| lh_S_front_inf               | -0.019 | -0.071, 0.033  | -0.71 | 0.480        | 0.960 |
| lh_S_front_middle            | -0.007 | -0.054, 0.041  | -0.27 | 0.784        | 0.976 |
| lh_S_front_sup               | -0.001 | -0.039, 0.037  | -0.05 | 0.964        | 0.992 |
| lh_S_interm_prim.Jensen      | -0.003 | -0.053, 0.048  | -0.10 | 0.922        | 0.992 |
| lh_S_intrapariet_and_P_trans | -0.012 | -0.057, 0.033  | -0.53 | 0.596        | 0.975 |
| lh_S_oc_middle_and_Lunatus   | -0.035 | -0.107, 0.037  | -0.97 | 0.335        | 0.898 |
| lh_S_oc_sup_and_transversal  | -0.028 | -0.084, 0.029  | -0.97 | 0.335        | 0.898 |
| lh_S_occipital_ant           | -0.006 | -0.054, 0.041  | -0.27 | 0.788        | 0.976 |
| lh_S_oc.temp_lat             | -0.076 | -0.127, -0.025 | -2.98 | <b>0.004</b> | 0.315 |
| lh_S_oc.temp_med_and_Lingual | -0.004 | -0.051, 0.044  | -0.15 | 0.880        | 0.980 |
| lh_S_orbital_lateral         | 0.001  | -0.077, 0.079  | 0.02  | 0.982        | 0.992 |
| lh_S_orbital_med.olfact      | -0.070 | -0.221, 0.081  | -0.92 | 0.360        | 0.898 |
| lh_S_orbital.H_Shaped        | -0.046 | -0.105, 0.014  | -1.53 | 0.129        | 0.735 |
| lh_S_parieto_occipital       | 0.008  | -0.033, 0.05   | 0.40  | 0.690        | 0.975 |
| lh_S_pericallosal            | -0.015 | -0.058, 0.028  | -0.68 | 0.497        | 0.962 |
| lh_S_postcentral             | -0.022 | -0.059, 0.014  | -1.21 | 0.230        | 0.834 |
| lh_S_precentral.inf.part     | -0.005 | -0.058, 0.049  | -0.17 | 0.865        | 0.980 |
| lh_S_precentral.sup.part     | -0.009 | -0.048, 0.031  | -0.45 | 0.654        | 0.975 |
| lh_S_suborbital              | -0.029 | -0.133, 0.074  | -0.56 | 0.576        | 0.975 |
| lh_S_subparietal             | 0.035  | -0.012, 0.082  | 1.47  | 0.146        | 0.735 |
| lh_S_temporal_inf            | 0.046  | -0.033, 0.126  | 1.16  | 0.250        | 0.868 |
| lh_S_temporal_sup            | 0.003  | -0.04, 0.046   | 0.13  | 0.894        | 0.989 |
| lh_S_temporal_transverse     | 0.011  | -0.046, 0.069  | 0.39  | 0.696        | 0.975 |
| rh_G_and_S_frontomargin      | -0.100 | -0.189, -0.01  | -2.22 | <b>0.029</b> | 0.492 |
| rh_G_and_S_occipital_inf     | -0.014 | -0.096, 0.068  | -0.34 | 0.732        | 0.975 |
| rh_G_and_S_paracentral       | -0.017 | -0.065, 0.032  | -0.68 | 0.497        | 0.962 |
| rh_G_and_S_subcentral        | 0.003  | -0.038, 0.045  | 0.16  | 0.874        | 0.980 |
| rh_G_and_S_transv_frontopol  | -0.015 | -0.084, 0.054  | -0.44 | 0.662        | 0.975 |
| rh_G_and_S_cingul.Ant        | -0.023 | -0.073, 0.027  | -0.91 | 0.366        | 0.898 |
| rh_G_and_S_cingul.Mid.Ant    | -0.044 | -0.083, -0.004 | -2.18 | <b>0.032</b> | 0.492 |
| rh_G_and_S_cingul.Mid.Post   | -0.004 | -0.042, 0.035  | -0.19 | 0.848        | 0.976 |
| rh_G_cingul.Post.dorsal      | 0.021  | -0.023, 0.065  | 0.96  | 0.338        | 0.898 |
| rh_G_cingul.Post.ventral     | 0.002  | -0.068, 0.073  | 0.06  | 0.950        | 0.992 |
| rh_G_cuneus                  | -0.008 | -0.069, 0.054  | -0.25 | 0.804        | 0.976 |
| rh_G_front_inf.Opercular     | -0.022 | -0.063, 0.018  | -1.10 | 0.272        | 0.892 |
| rh_G_front_inf.Orbital       | -0.058 | -0.13, 0.013   | -1.63 | 0.107        | 0.735 |
| rh_G_front_inf.Triangul      | -0.024 | -0.08, 0.033   | -0.83 | 0.406        | 0.924 |
| rh_G_front_middle            | -0.012 | -0.056, 0.031  | -0.56 | 0.574        | 0.975 |

**eTable 34. Differences in functional activity between the never-suicidal group and the concordantly-reported suicidality group for emotional faces: Welch's t-test**

| ROIs                         | Mean   | 95%CI          | t     | p (unc)      | p FDR |
|------------------------------|--------|----------------|-------|--------------|-------|
| rh_G_front_sup               | -0.007 | -0.037, 0.023  | -0.47 | 0.643        | 0.975 |
| rh_G_Ins_lg_and_S_cent_ins   | 0.038  | -0.013, 0.088  | 1.47  | 0.145        | 0.735 |
| rh_G_insular_short           | -0.029 | -0.067, 0.009  | -1.50 | 0.136        | 0.735 |
| rh_G_occipital_middle        | 0.008  | -0.045, 0.06   | 0.30  | 0.766        | 0.975 |
| rh_G_occipital_sup           | -0.007 | -0.068, 0.054  | -0.23 | 0.816        | 0.976 |
| rh_G_oc.temp_lat.fusifor     | -0.001 | -0.062, 0.061  | -0.02 | 0.984        | 0.992 |
| rh_G_oc.temp_med.Lingual     | 0.001  | -0.078, 0.079  | 0.01  | 0.988        | 0.992 |
| rh_G_oc.temp_med.Parahip     | -0.063 | -0.127, 0.001  | -1.97 | 0.052        | 0.639 |
| rh_G_orbital                 | -0.101 | -0.187, -0.015 | -2.32 | <b>0.022</b> | 0.492 |
| rh_G_pariet_inf.Angular      | -0.016 | -0.057, 0.025  | -0.77 | 0.445        | 0.953 |
| rh_G_pariet_inf.Supramar     | -0.004 | -0.039, 0.031  | -0.21 | 0.837        | 0.976 |
| rh_G_parietal_sup            | -0.006 | -0.047, 0.034  | -0.31 | 0.756        | 0.975 |
| rh_G_postcentral             | 0.004  | -0.035, 0.043  | 0.20  | 0.842        | 0.976 |
| rh_G_precentral              | 0.007  | -0.027, 0.04   | 0.40  | 0.690        | 0.975 |
| rh_G_precuneus               | 0.011  | -0.035, 0.056  | 0.46  | 0.645        | 0.975 |
| rh_G_rectus                  | -0.212 | -0.428, 0.003  | -1.96 | 0.054        | 0.639 |
| rh_G_subcallosal             | -0.032 | -0.105, 0.041  | -0.87 | 0.387        | 0.898 |
| rh_G_temp_sup.G_T_transv     | -0.006 | -0.056, 0.044  | -0.24 | 0.811        | 0.976 |
| rh_G_temp_sup.Lateral        | -0.017 | -0.056, 0.022  | -0.88 | 0.382        | 0.898 |
| rh_G_temp_sup.Plan_polar     | -0.010 | -0.043, 0.022  | -0.62 | 0.534        | 0.975 |
| rh_G_temp_sup.Plan_tempo     | 0.014  | -0.028, 0.056  | 0.66  | 0.513        | 0.963 |
| rh_G_temporal_inf            | -0.060 | -0.146, 0.027  | -1.37 | 0.173        | 0.754 |
| rh_G_temporal_middle         | 0.012  | -0.035, 0.06   | 0.52  | 0.605        | 0.975 |
| rh_Lat_Fis.ant.Horizontal    | -0.047 | -0.105, 0.01   | -1.64 | 0.104        | 0.735 |
| rh_Lat_Fis.ant.Vertical      | -0.052 | -0.121, 0.017  | -1.50 | 0.136        | 0.735 |
| rh_Lat_Fis.post              | 0.021  | -0.026, 0.069  | 0.89  | 0.376        | 0.898 |
| rh_Pole_occipital            | 0.020  | -0.084, 0.123  | 0.38  | 0.704        | 0.975 |
| rh_Pole_temporal             | -0.018 | -0.096, 0.061  | -0.45 | 0.656        | 0.975 |
| rh_S_calcarine               | 0.016  | -0.054, 0.087  | 0.46  | 0.645        | 0.975 |
| rh_S_central                 | 0.010  | -0.042, 0.061  | 0.37  | 0.710        | 0.975 |
| rh_S_cingul.Marginalis       | 0.006  | -0.034, 0.045  | 0.29  | 0.770        | 0.975 |
| rh_S_circular_insula_ant     | -0.061 | -0.111, -0.011 | -2.44 | <b>0.017</b> | 0.492 |
| rh_S_circular_insula_inf     | 0.003  | -0.039, 0.046  | 0.16  | 0.875        | 0.980 |
| rh_S_circular_insula_sup     | -0.007 | -0.05, 0.036   | -0.33 | 0.746        | 0.975 |
| rh_S_collat_transv_ant       | -0.039 | -0.124, 0.045  | -0.93 | 0.357        | 0.898 |
| rh_S_collat_transv_post      | -0.032 | -0.096, 0.033  | -0.98 | 0.332        | 0.898 |
| rh_S_front_inf               | -0.033 | -0.083, 0.017  | -1.31 | 0.192        | 0.785 |
| rh_S_front_middle            | -0.047 | -0.088, -0.006 | -2.29 | <b>0.024</b> | 0.492 |
| rh_S_front_sup               | -0.014 | -0.052, 0.023  | -0.76 | 0.452        | 0.956 |
| rh_S_interm_prim.Jensen      | -0.070 | -0.116, -0.025 | -3.08 | <b>0.003</b> | 0.315 |
| rh_S_intrapariet_and_P_trans | -0.010 | -0.055, 0.035  | -0.44 | 0.658        | 0.975 |
| rh_S_oc_middle_and_Lunatus   | -0.045 | -0.113, 0.023  | -1.31 | 0.193        | 0.785 |
| rh_S_oc_sup_and_transversal  | 0.025  | -0.029, 0.079  | 0.93  | 0.356        | 0.898 |

**eTable 34. Differences in functional activity between the never-suicidal group and the concordantly-reported suicidality group for emotional faces: Welch's t-test**

| <b>ROIs</b>                  | <b>Mean</b> | <b>95%CI</b>  | <b>t</b> | <b>p (unc)</b> | <b>p FDR</b> |
|------------------------------|-------------|---------------|----------|----------------|--------------|
| rh_S_occipital_ant           | 0.019       | -0.023, 0.061 | 0.89     | 0.374          | 0.898        |
| rh_S_oc.temp_lat             | -0.014      | -0.061, 0.033 | -0.60    | 0.552          | 0.975        |
| rh_S_oc.temp_med_and_Lingual | 0.019       | -0.028, 0.067 | 0.81     | 0.418          | 0.924        |
| rh_S_orbital_lateral         | -0.003      | -0.069, 0.064 | -0.08    | 0.938          | 0.992        |
| rh_S_orbital_med.olfact      | -0.033      | -0.19, 0.123  | -0.42    | 0.674          | 0.975        |
| rh_S_orbital.H_Shaped        | -0.055      | -0.121, 0.011 | -1.66    | 0.101          | 0.735        |
| rh_S_parieto_occipital       | 0.033       | -0.01, 0.077  | 1.53     | 0.129          | 0.735        |
| rh_S_pericallosal            | -0.002      | -0.056, 0.052 | -0.08    | 0.935          | 0.992        |
| rh_S_postcentral             | -0.008      | -0.042, 0.027 | -0.45    | 0.655          | 0.975        |
| rh_S_precentral.inf.part     | -0.008      | -0.059, 0.043 | -0.30    | 0.767          | 0.975        |
| rh_S_precentral.sup.part     | -0.023      | -0.066, 0.02  | -1.06    | 0.292          | 0.898        |
| rh_S_suborbital              | 0.044       | -0.122, 0.21  | 0.53     | 0.596          | 0.975        |
| rh_S_subparietal             | 0.015       | -0.036, 0.067 | 0.59     | 0.554          | 0.975        |
| rh_S_temporal_inf            | -0.056      | -0.134, 0.021 | -1.45    | 0.150          | 0.735        |
| rh_S_temporal_sup            | 0.006       | -0.031, 0.043 | 0.34     | 0.738          | 0.975        |
| rh_S_temporal_transverse     | -0.012      | -0.067, 0.043 | -0.44    | 0.664          | 0.975        |

**Bold** denotes group differences at  $p < 0.05$  uncorrected

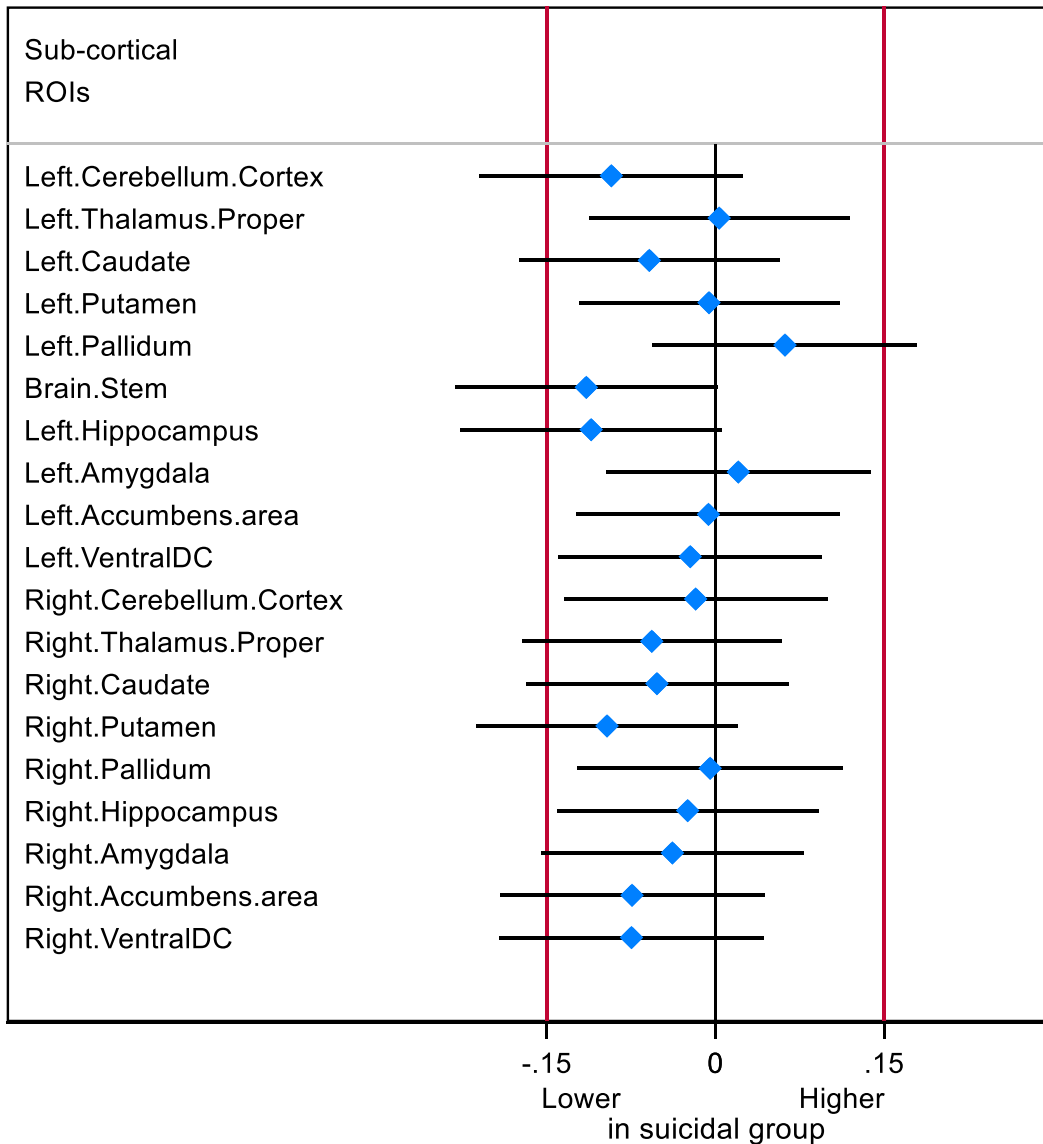

**eFigure 54.** Results of the Equivalence test for differences in functional activity in subcortical regions between the never-suicidal group and the child-reported suicidality group for emotional faces. The figure shows the effect sizes and 95% confidence intervals of the difference against the interval of equivalence (-0.15 to 0.15).

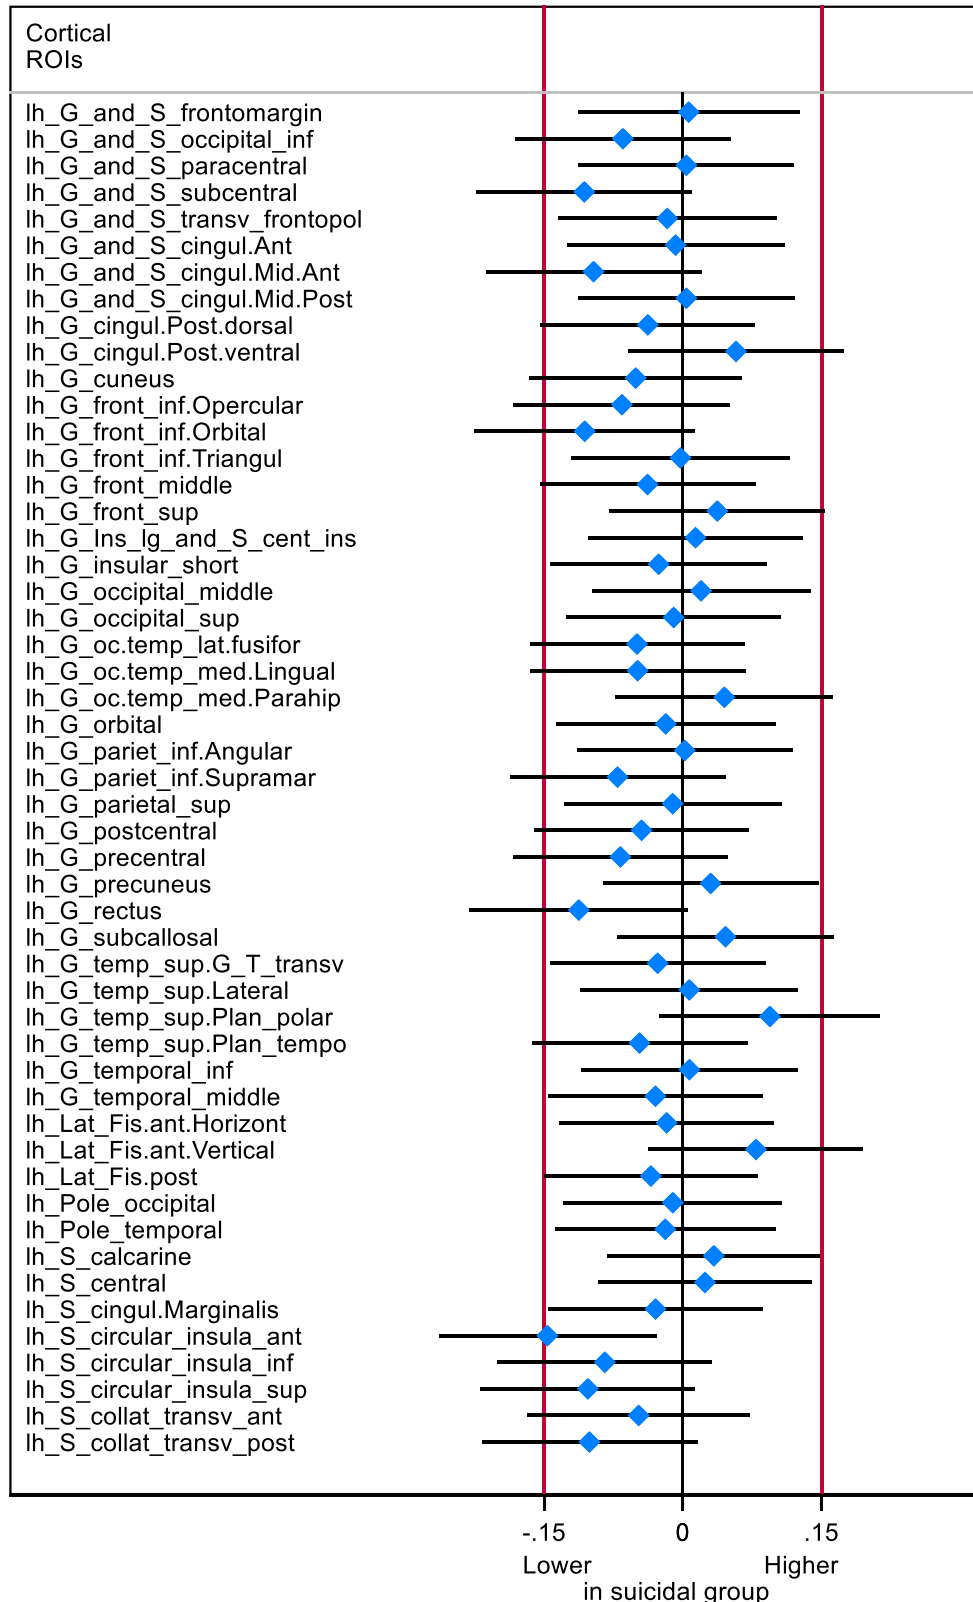

**eFigure 55 (1 of 3).** Results of the Equivalence test for differences in functional activity in cortical regions between the never-suicidal group and the child-reported suicidality group for emotional faces. The figure shows the effect sizes and 95% confidence intervals of the difference against the interval of equivalence (-0.15 to 0.15).



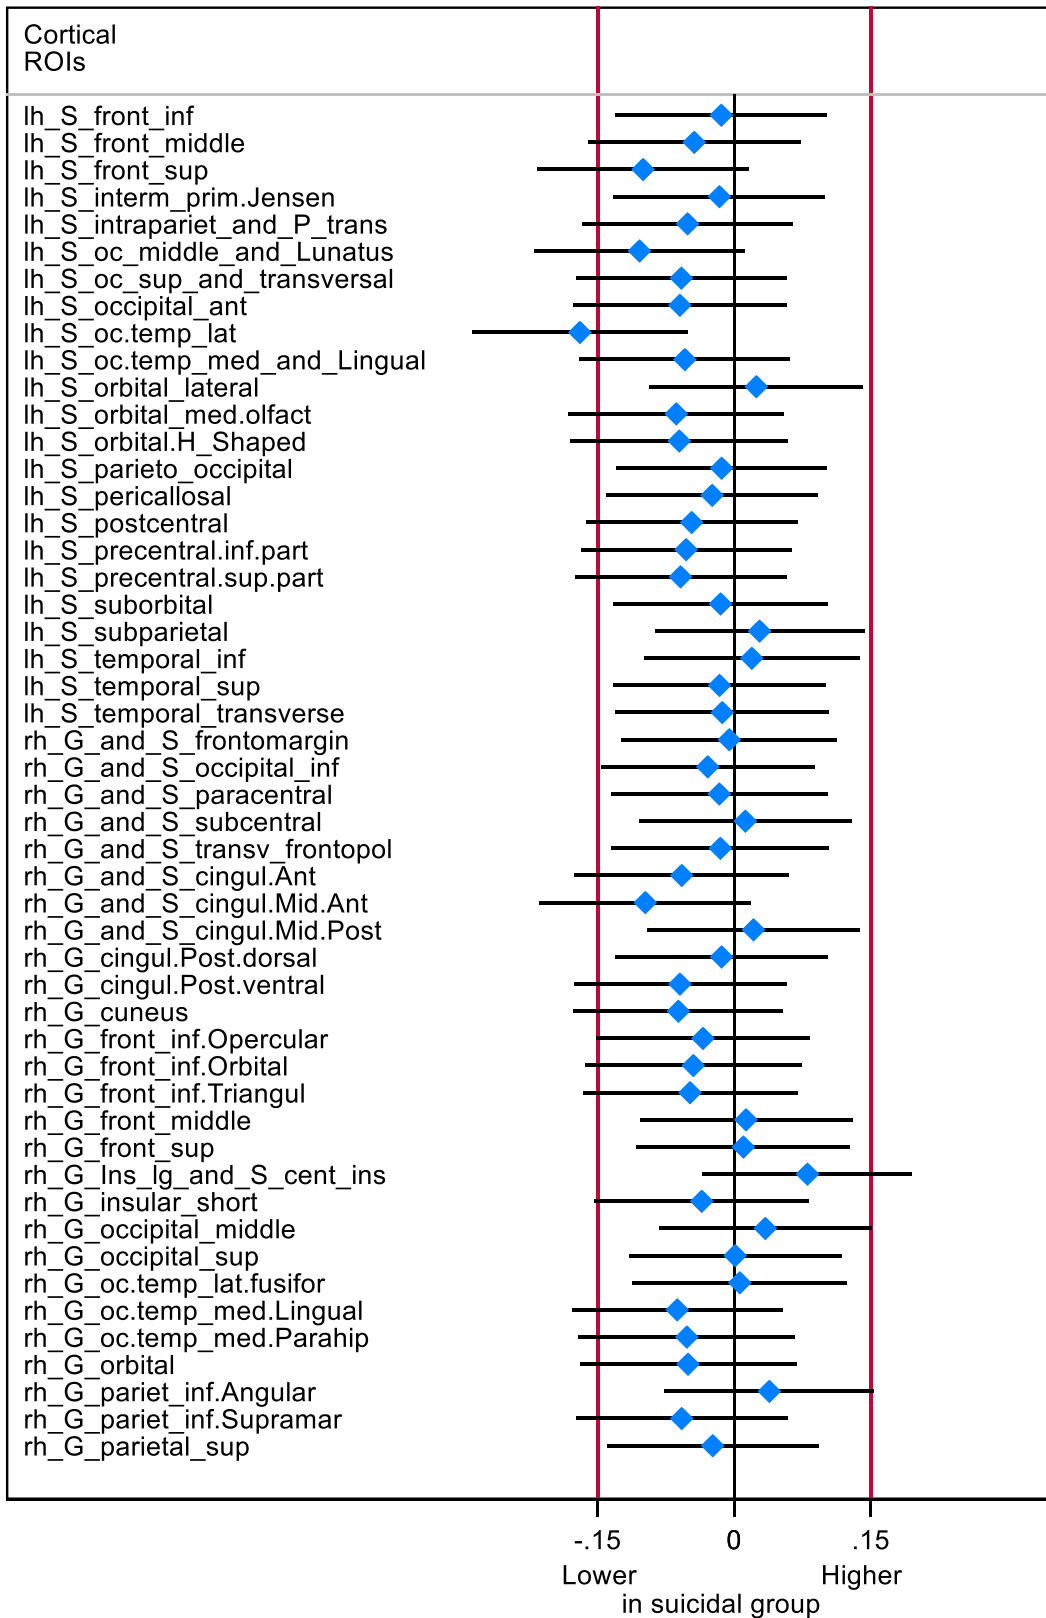

**eFigure 55 (2 of 3).** Results of the Equivalence test for differences in functional activity in cortical regions between the never-suicidal group and the child-reported suicidality group for emotional faces. The figure shows the effect sizes and 95% confidence intervals of the difference against the interval of equivalence (-0.15 to 0.15).

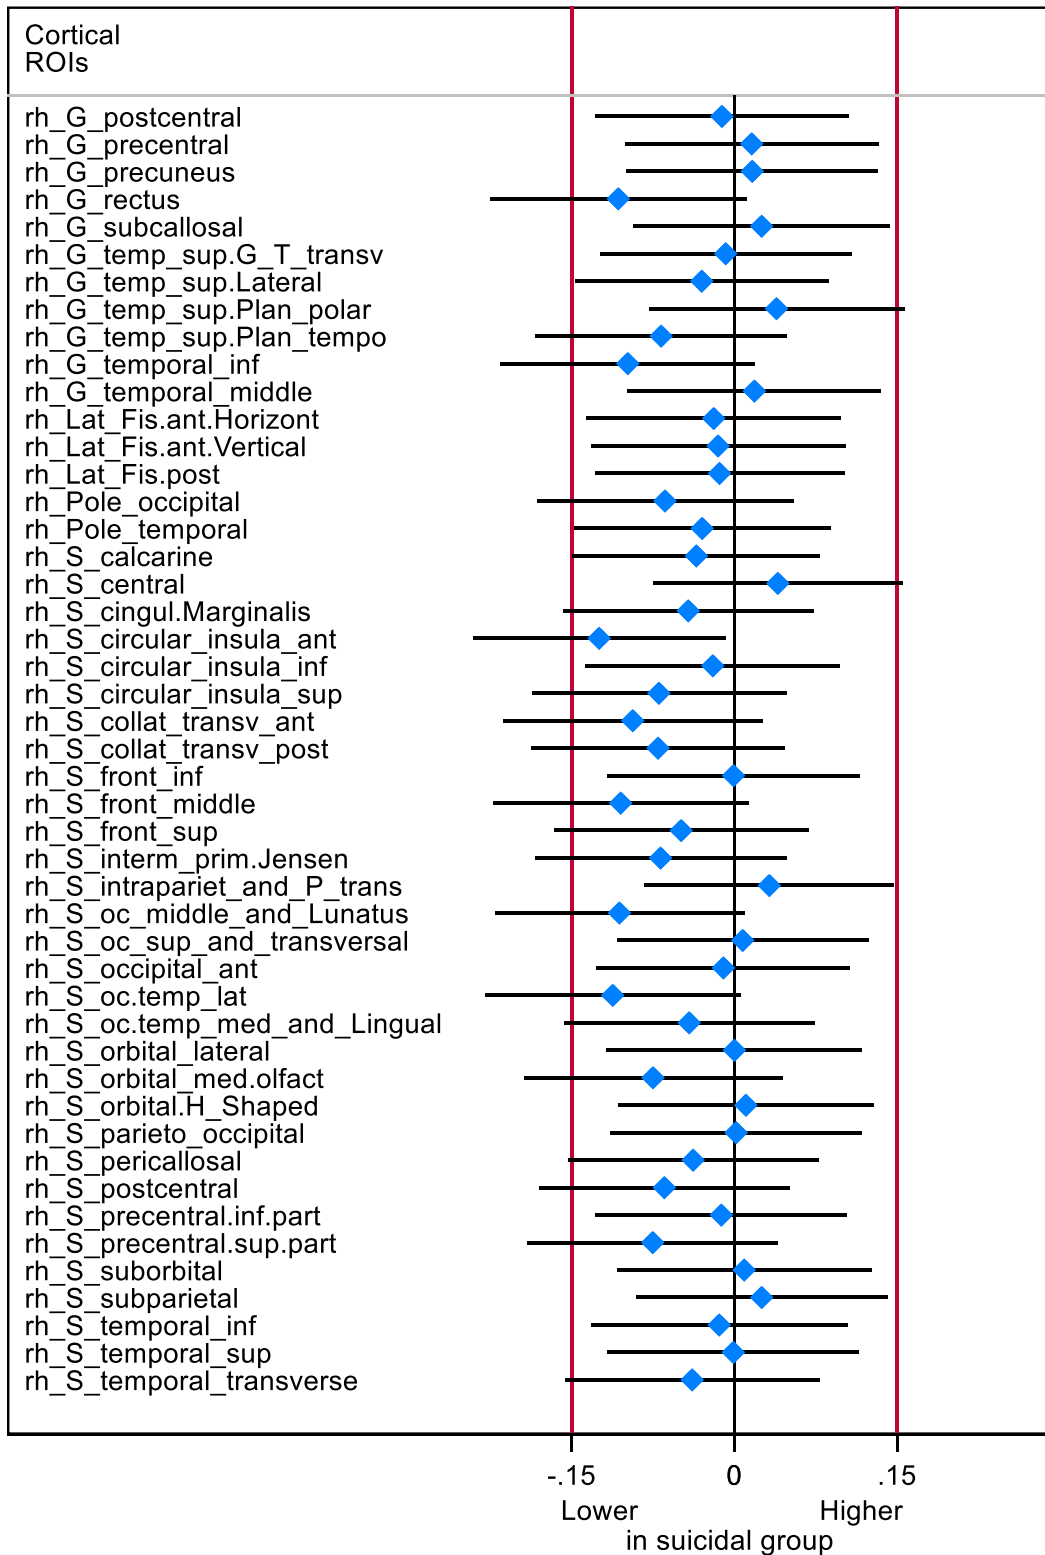

**eFigure 55 (3 of 3).** Results of the Equivalence test for differences in functional activity in cortical regions between the never-suicidal group and the child-reported suicidality group for emotional faces. The figure shows the effect sizes and 95% confidence intervals of the difference against the interval of equivalence (-0.15 to 0.15).

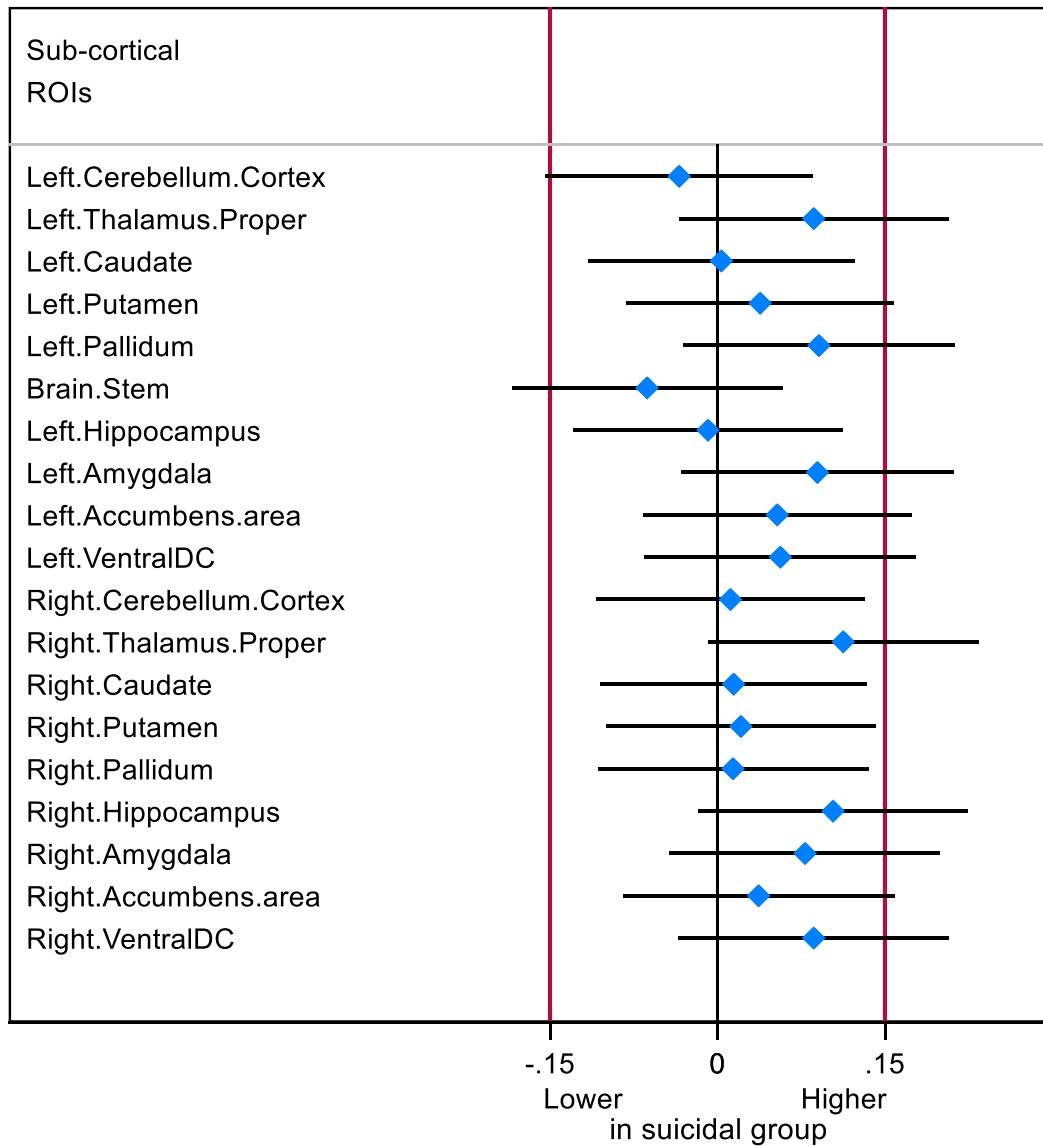

**eFigure 56.** Results of the Equivalence test for differences in functional activity in subcortical regions between the never-suicidal group and the caregiver-reported suicidality group for emotional faces. The figure shows the effect sizes and 95% confidence intervals of the difference against the interval of equivalence (-0.15 to 0.15).

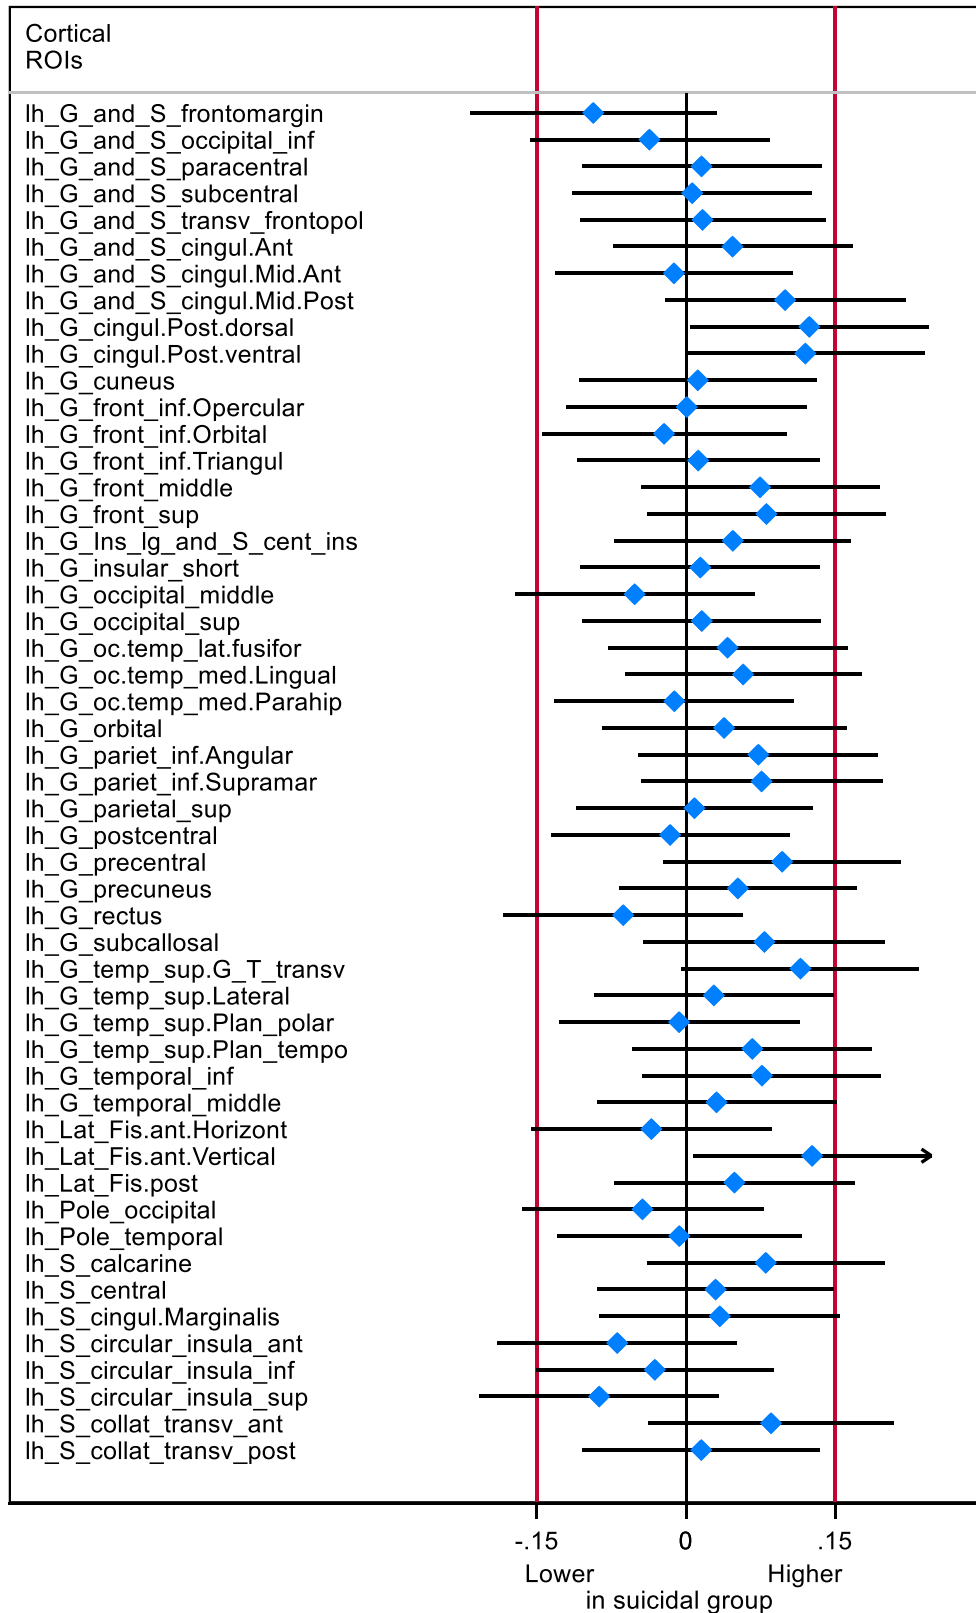

**eFigure 57 (1 of 3).** Results of the Equivalence test for differences in functional activity in cortical regions between the never-suicidal group and the caregiver-reported suicidality group for emotional faces. The figure shows the effect sizes and 95% confidence intervals of the difference against the interval of equivalence (-0.15 to 0.15).

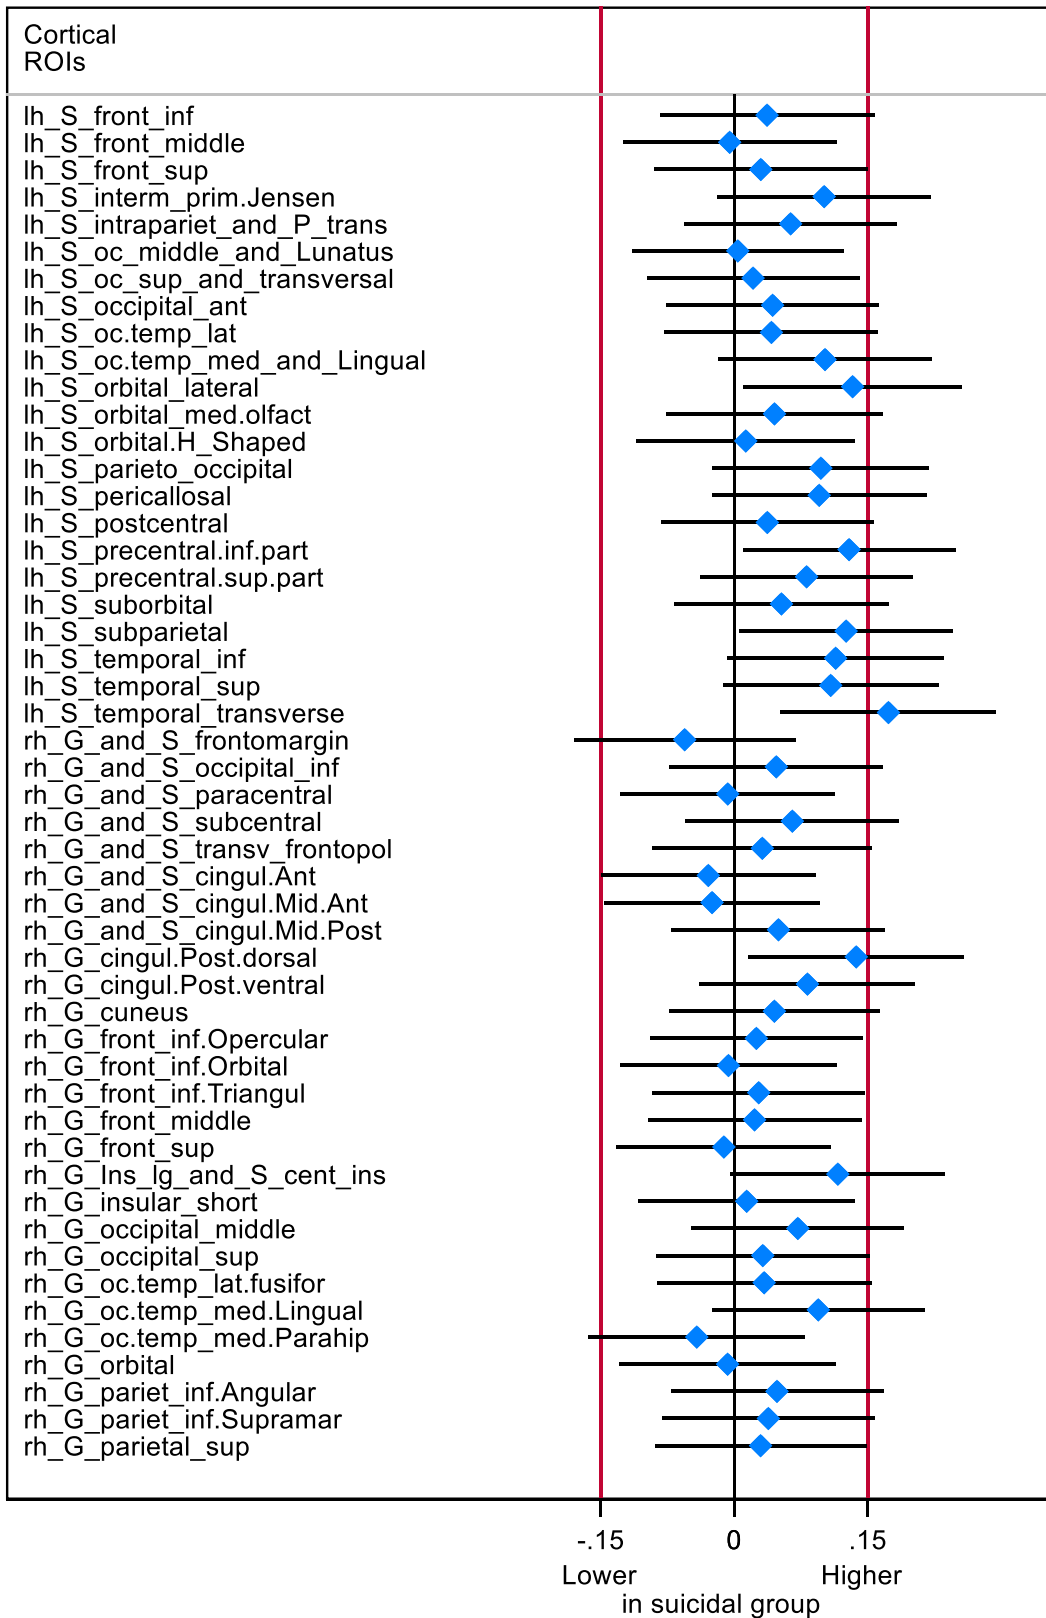

**eFigure 57 (2 of 3).** Results of the Equivalence test for differences in functional activity in cortical regions between the never-suicidal group and the caregiver-reported suicidality group for emotional faces. The figure shows the effect sizes and 95% confidence intervals of the difference against the interval of equivalence (-0.15 to 0.15).

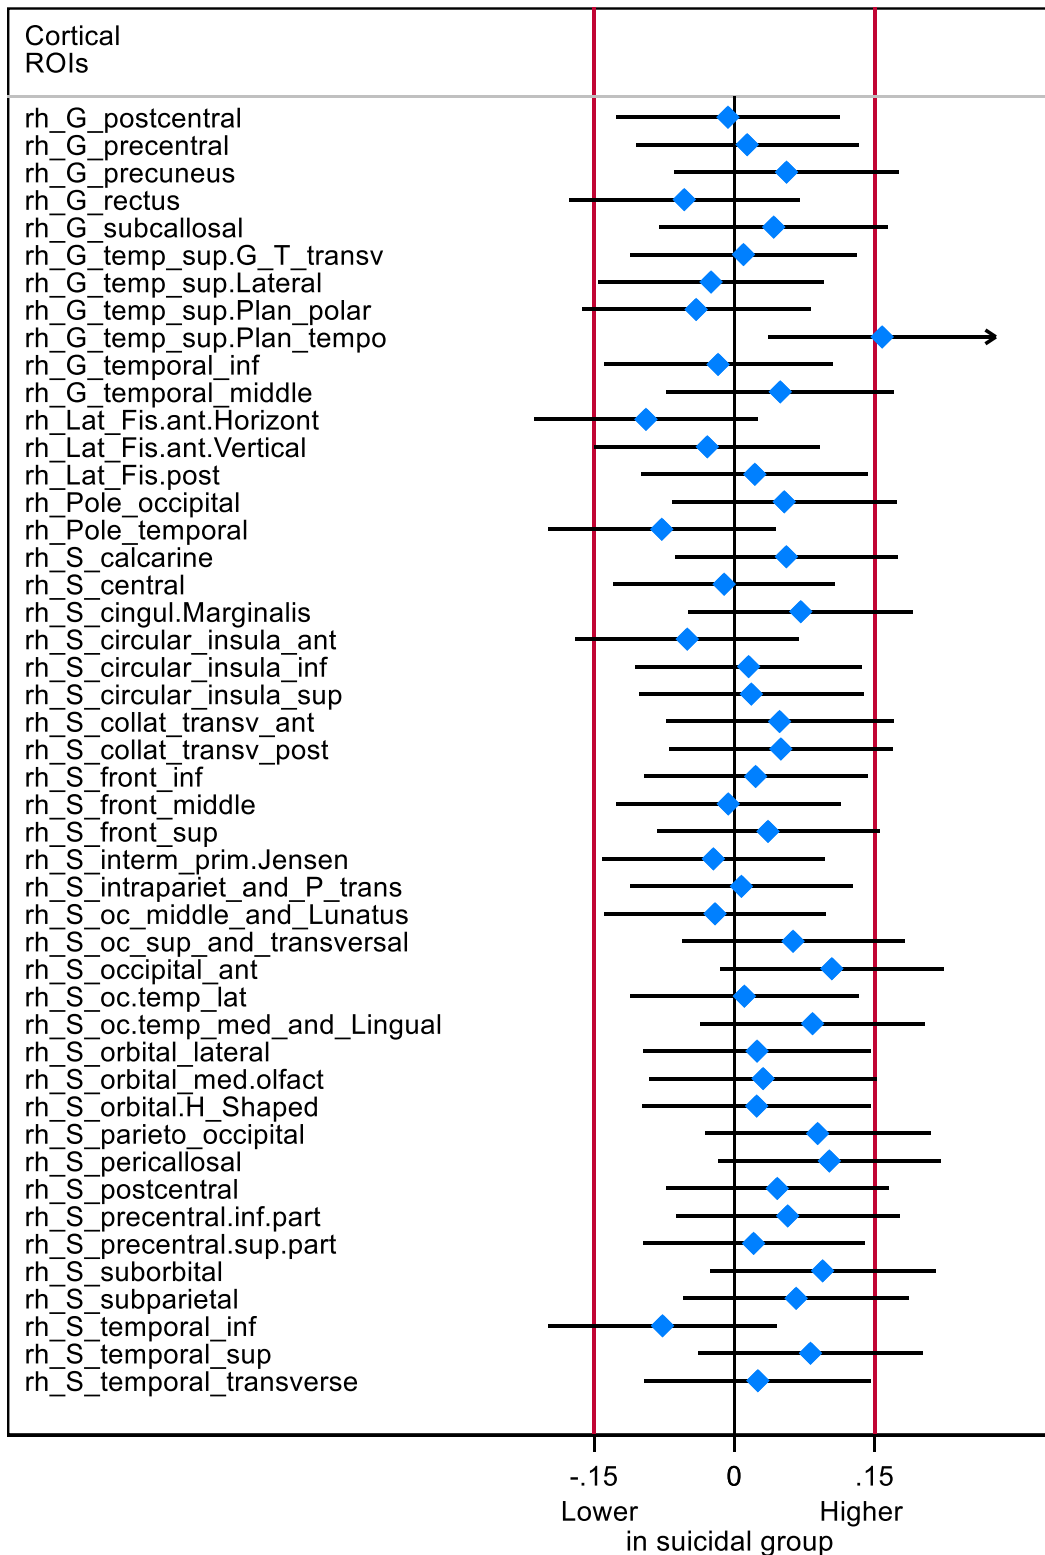

**eFigure 57 (3 of 3).** Results of the Equivalence test for differences in functional activity in cortical regions between the never-suicidal group and the caregiver-reported suicidality group for emotional faces. The figure shows the effect sizes and 95% confidence intervals of the difference against the interval of equivalence (-0.15 to 0.15).

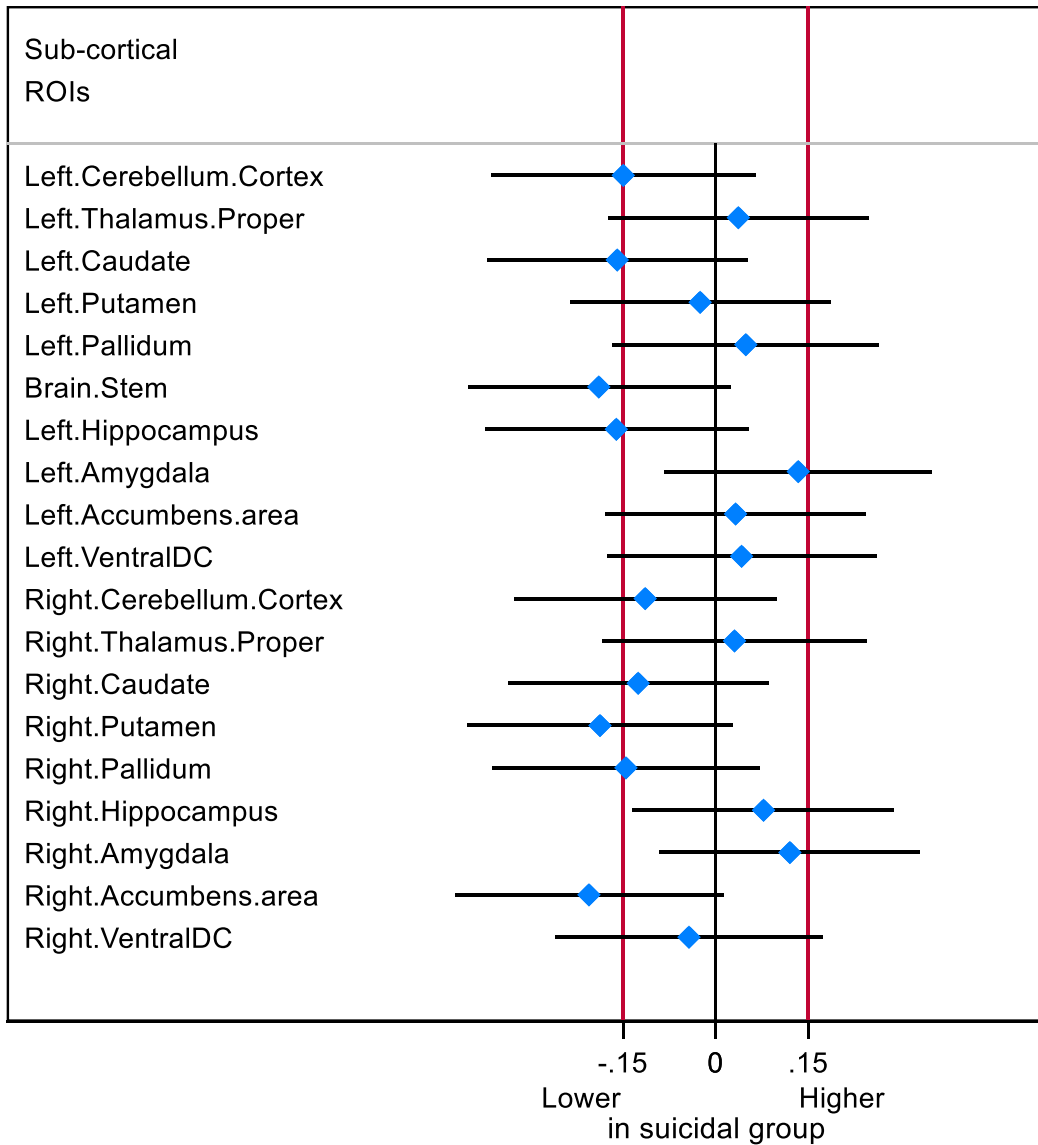

**eFigure 58.** Results of the Equivalence test for differences in functional activity in subcortical regions between the never-suicidal group and the concordantly-reported suicidality group for emotional faces. The figure shows the effect sizes and 95% confidence intervals of the difference against the interval of equivalence (-0.15 to 0.15).

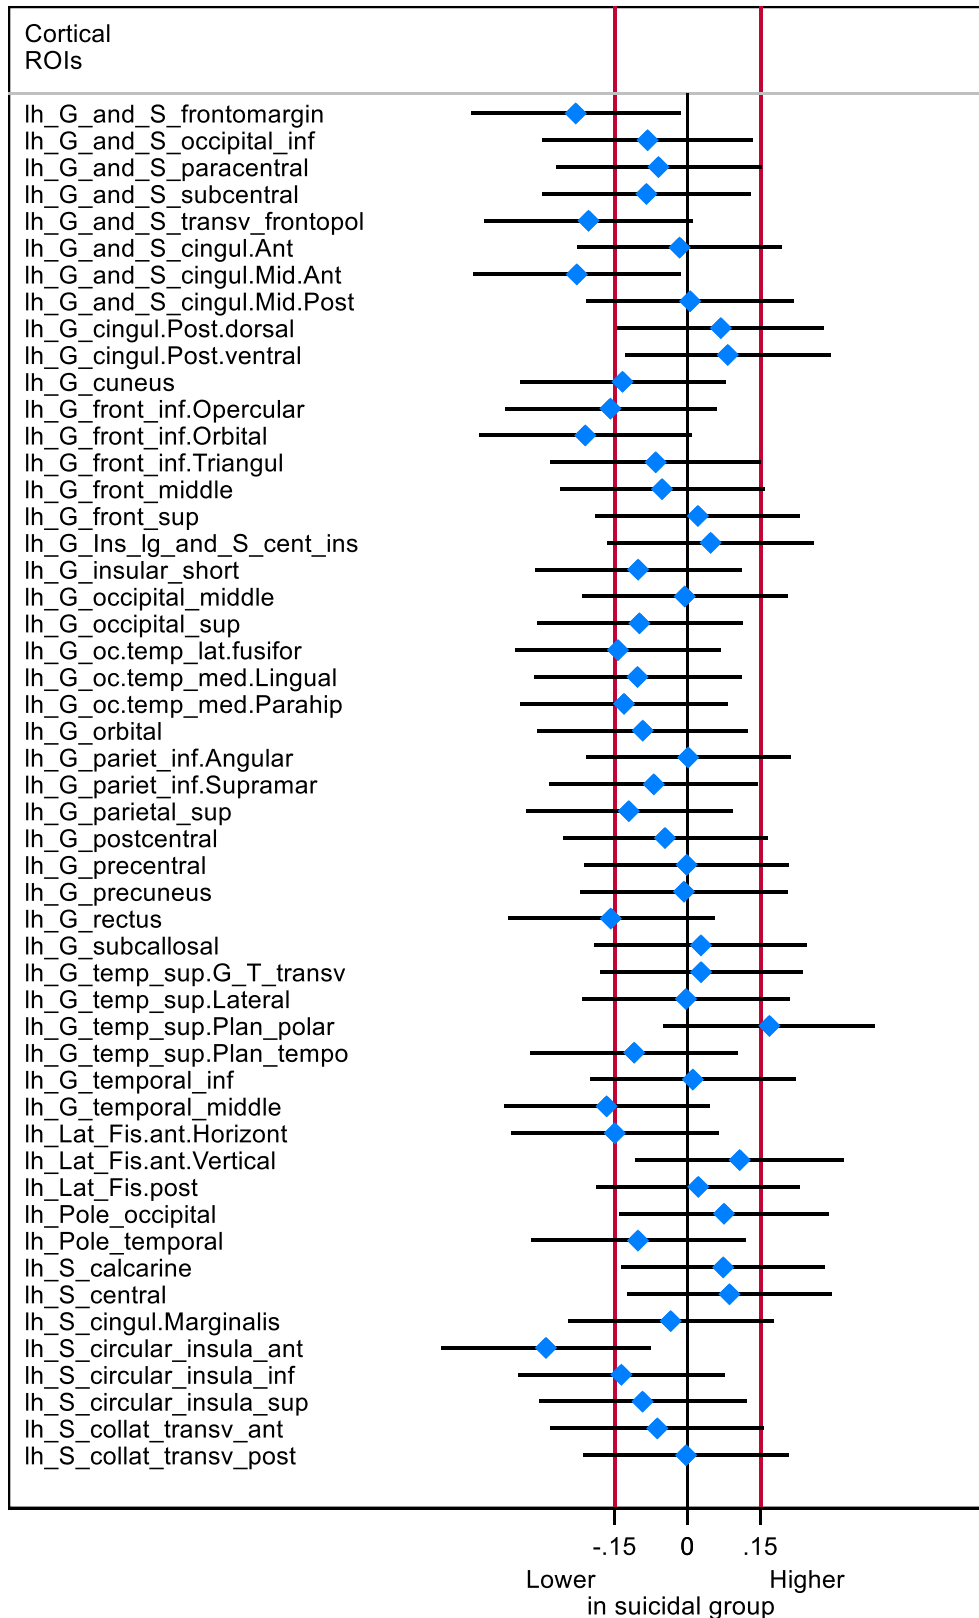

**eFigure 59 (1 of 3).** Results of the Equivalence test for differences in functional activity in cortical regions between the never-suicidal group and the concordantly-reported suicidality group for emotional faces. The figure shows the effect sizes and 95% confidence intervals of the difference against the interval of equivalence (-0.15 to 0.15).



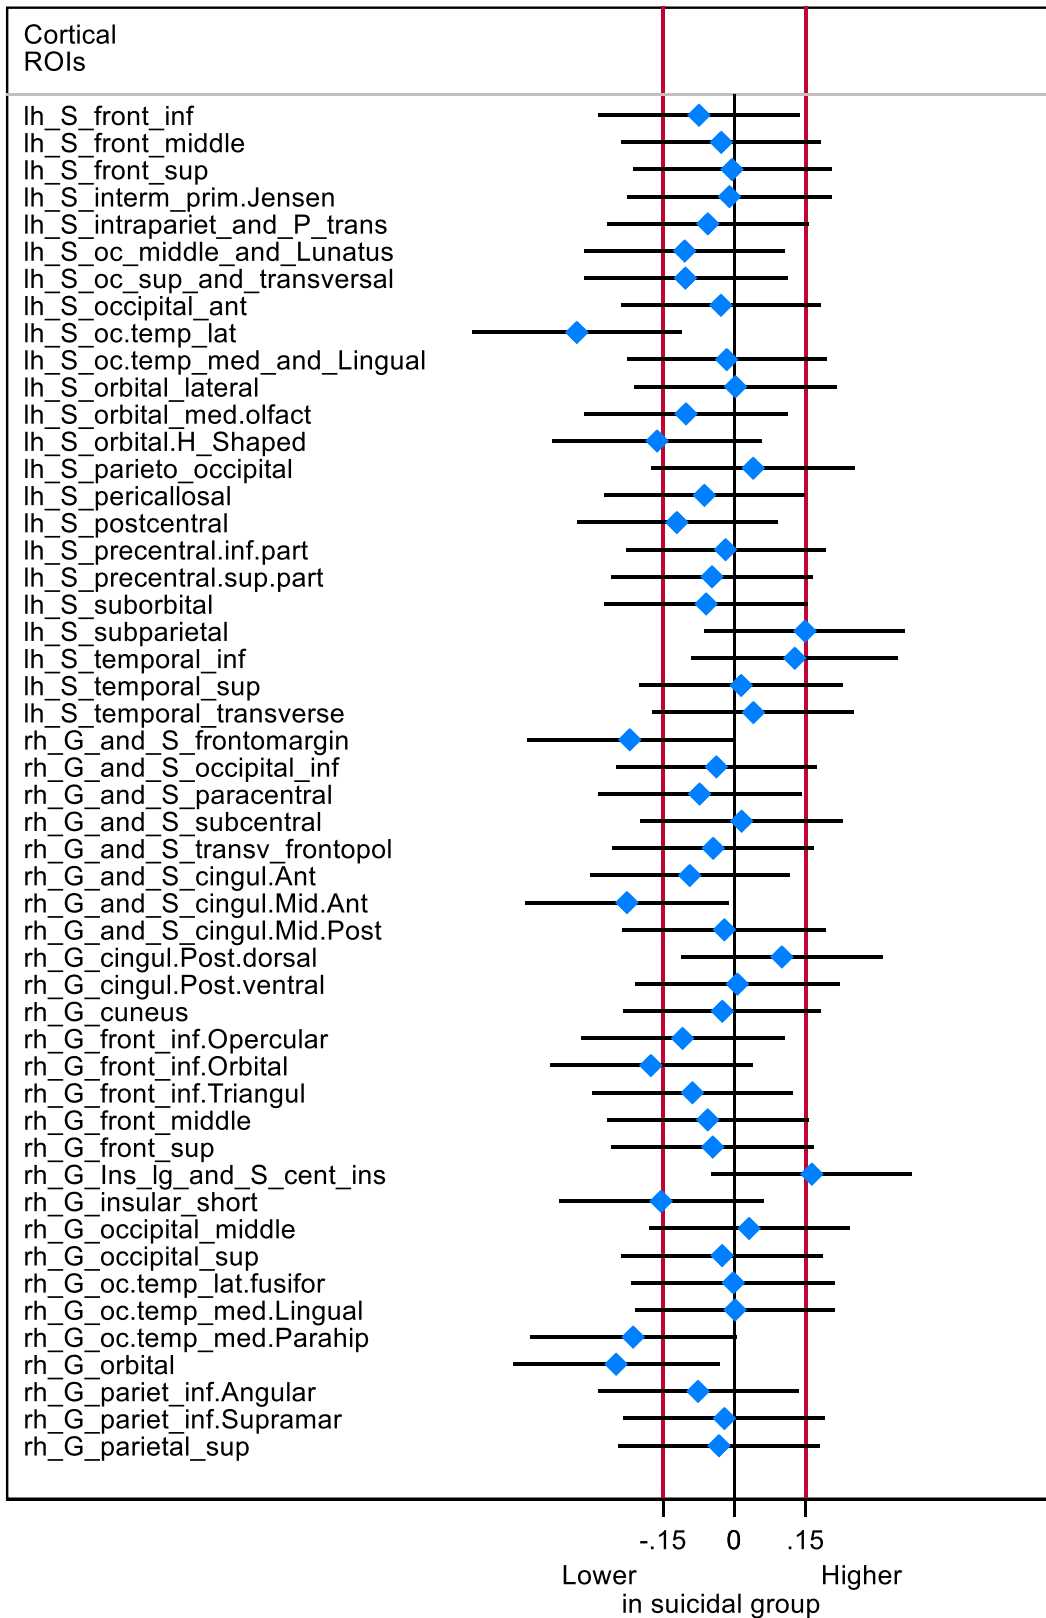

**eFigure 59 (2 of 3).** Results of the Equivalence test for differences in functional activity in cortical regions between the never-suicidal group and the concordantly-reported suicidality group for emotional faces. The figure shows the effect sizes and 95% confidence intervals of the difference against the interval of equivalence (-0.15 to 0.15).

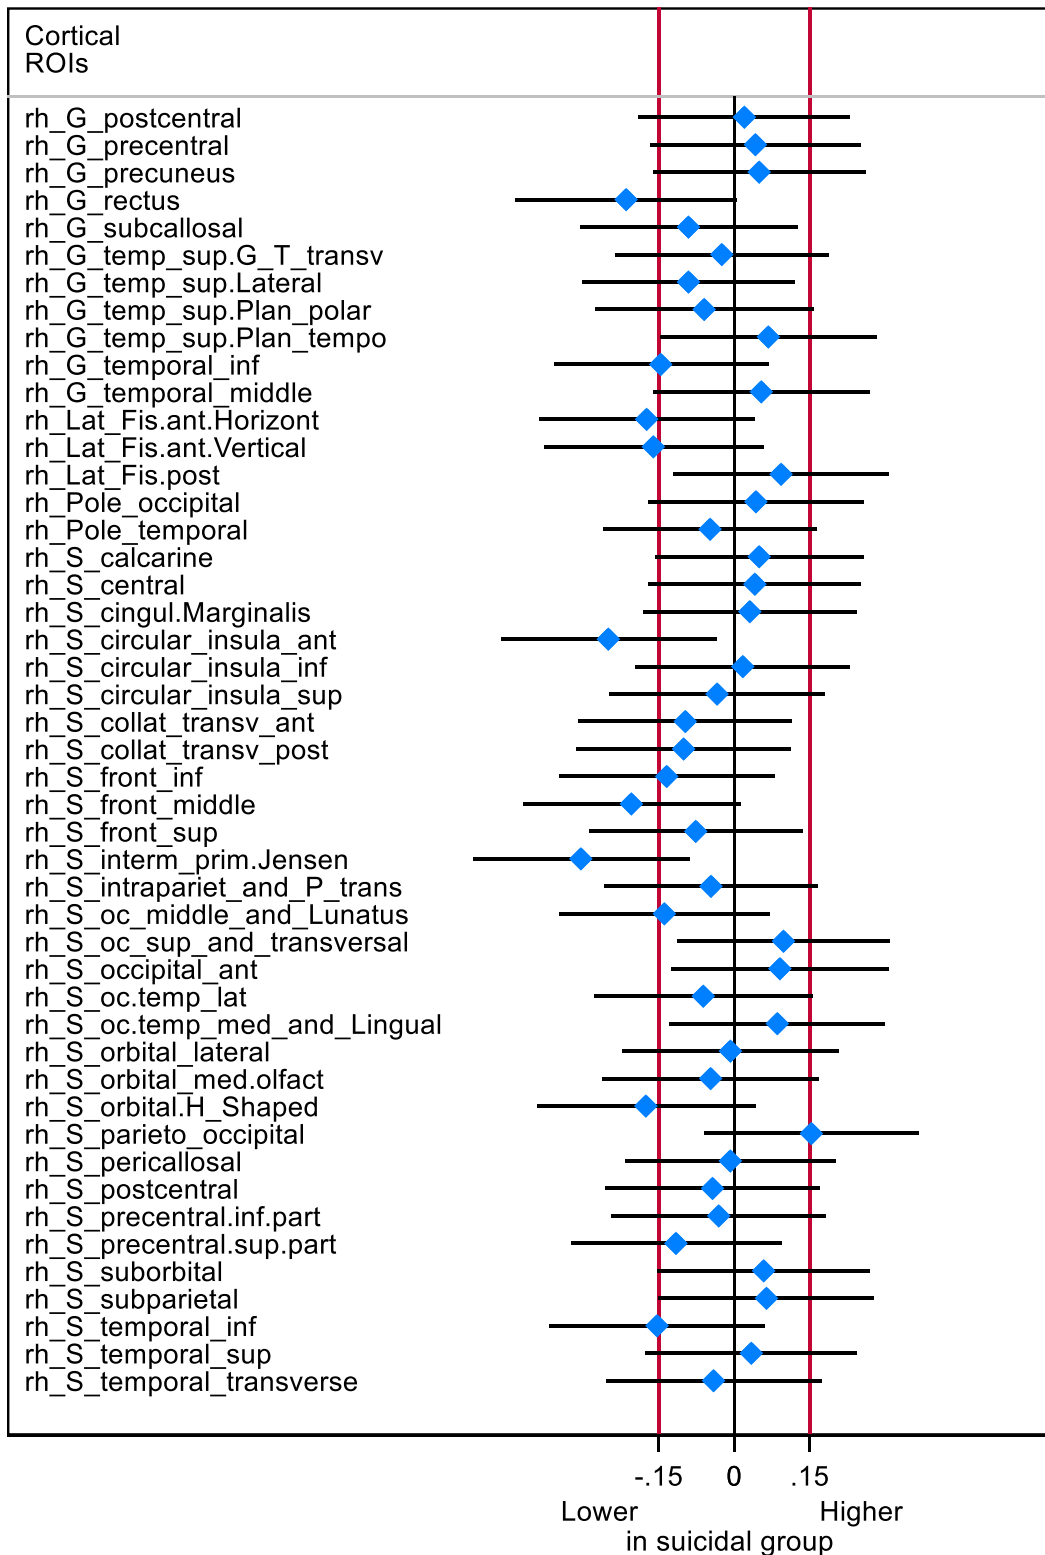

**eFigure 59 (3 of 3).** Results of the Equivalence test for differences in functional activity in cortical regions between the never-suicidal group and the concordantly-reported suicidality group for emotional faces. The figure shows the effect sizes and 95% confidence intervals of the difference against the interval of equivalence (-0.15 to 0.15).

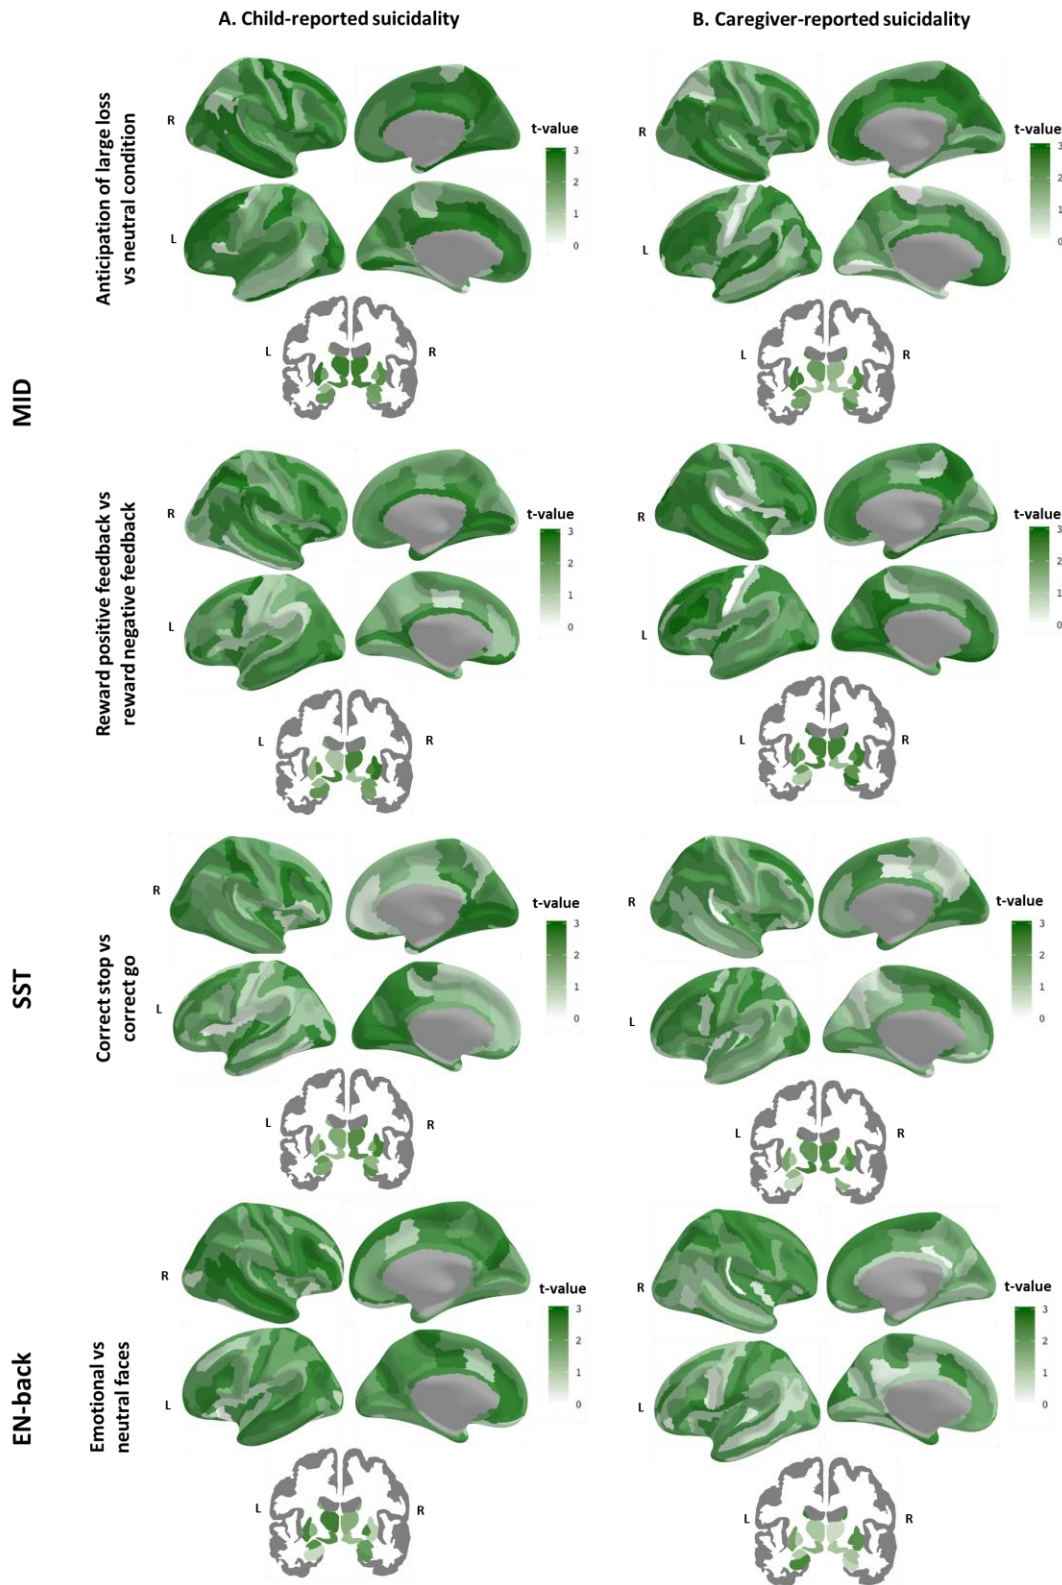

**eFigure 60. Equivalence testing for mean differences in functional activation during the MID task, the SST and EN-back task relating to suicidality.** Distribution of absolute t-values from Equivalence tests comparing the regional means between the never-suicidal group and the child-reported suicidality group (Panel A) and the caregiver-reported suicidality group (Panel B); Higher t-values (i.e., darker green) suggest equivalence between groups. No statistical differences were found after applying FDR-correction for multiple comparisons.

**eTable 35. Range of effect sizes (Cohen's d) and 90% confidence intervals bounds for each imaging modality and suicidality group comparison**

| Contrast                            |             | Child |      | Caregiver |      | Concordant |       |
|-------------------------------------|-------------|-------|------|-----------|------|------------|-------|
|                                     |             | Min   | Max  | Min       | Max  | Min        | Max   |
| <b>sMRI</b>                         |             |       |      |           |      |            |       |
| -                                   | ES range    | -0.11 | 0.12 | -0.17     | 0.11 | -0.23      | 0.23  |
|                                     | 90%CI range | -0.20 | 0.20 | -0.26     | 0.19 | -0.39      | 0.39  |
| <b>rs-fMRI</b>                      |             |       |      |           |      |            |       |
| -                                   | ES range    | -0.17 | 0.14 | -0.18     | 0.20 | -0.34      | 0.28  |
|                                     | 90%CI range | -0.29 | 0.25 | -0.30     | 0.32 | -0.55      | -0.49 |
| <b>Task-based fMRI</b>              |             |       |      |           |      |            |       |
| <b>MID</b>                          |             |       |      |           |      |            |       |
| <i>Reward anticipation</i>          | ES range    | -0.17 | 0.08 | -0.12     | 0.12 | -0.34      | 0.20  |
|                                     | 90%CI range | -0.28 | 0.18 | -0.23     | 0.23 | -0.54      | 0.40  |
| <i>Loss anticipation</i>            | ES range    | -0.13 | 0.12 | -0.15     | 0.09 | -0.30      | 0.22  |
|                                     | 90%CI range | -0.23 | 0.23 | -0.26     | 0.21 | -0.51      | 0.42  |
| <i>Reward feedback</i>              | ES range    | -0.13 | 0.07 | -0.17     | 0.10 | -0.33      | 0.22  |
|                                     | 90%CI range | -0.23 | 0.17 | -0.28     | 0.21 | -0.54      | 0.42  |
| <i>Loss feedback</i>                | ES range    | -0.13 | 0.10 | -0.08     | 0.20 | -0.19      | 0.22  |
|                                     | 90%CI range | -0.23 | 0.21 | -0.19     | 0.31 | -0.39      | 0.42  |
| <b>SST</b>                          |             |       |      |           |      |            |       |
| <i>Incorrect stop vs correct go</i> | ES range    | -0.15 | 0.12 | -0.15     | 0.12 | -0.20      | 0.21  |
|                                     | 90%CI range | -0.26 | 0.23 | -0.26     | 0.21 | -0.41      | 0.42  |
| <i>Correct stop vs correct go</i>   | ES range    | -0.08 | 0.16 | -0.08     | 0.16 | -0.24      | 0.25  |
|                                     | 90%CI range | -0.19 | 0.26 | -0.25     | 0.26 | -0.45      | 0.47  |
| <b>ENBack</b>                       |             |       |      |           |      |            |       |
| <i>2-back vs 0-back</i>             | ES range    | -0.15 | 0.06 | -0.15     | 0.12 | -0.32      | 0.17  |
|                                     | 90%CI range | -0.26 | 0.17 | -0.27     | 0.23 | -0.53      | 0.38  |
| <i>Emotional vs neutral faces</i>   | ES range    | -0.17 | 0.09 | -0.09     | 0.17 | -0.33      | 0.17  |
|                                     | 90%CI range | -0.28 | 0.21 | -0.21     | 0.29 | -0.55      | 0.38  |

CI, confidence interval. ES, effect size. Min, minimum. Max, maximum. MID, Monetary incentive delay task. SST, Stop signal task. EN-back, Emotional n-back task.

**eTable 36. Results, 95% confidence intervals and area under precision-recall curve with effect sizes (Cohen’s *d*) largest than |0.15| for each imaging modality in child- and caregiver-suicidality group comparison**

|                            | Child                                     |       |              |      | Caregiver                                                      |       |              |      |
|----------------------------|-------------------------------------------|-------|--------------|------|----------------------------------------------------------------|-------|--------------|------|
|                            | Parcellation                              | ES    | 95%CI        | PRC  | Parcellation                                                   | ES    | 95%CI        | PRC  |
| <b>sMRI</b>                |                                           |       |              |      |                                                                |       |              |      |
|                            | None                                      | -     | -            |      | L bank superior temporal sulcus <sup>a</sup>                   | -0.17 | -0.26, -0.08 | 0.07 |
| <b>rs-fMRI</b>             |                                           |       |              |      |                                                                |       |              |      |
|                            | Cingulo-parietal – Fronto-parietal        | -0.17 | -0.29, -0.06 | 0.07 | Default - R hippocampus                                        | -0.18 | -0.3, -0.06  | 0.07 |
|                            |                                           |       |              |      | Default – L amygdala                                           | -0.17 | -0.29, -0.05 | 0.07 |
|                            |                                           |       |              |      | Dorsal attention – L cerebellum                                | 0.15  | 0.03, 0.27   | 0.10 |
|                            |                                           |       |              |      | Auditory – R ventral dc                                        | 0.15  | 0.03, 0.27   | 0.09 |
|                            |                                           |       |              |      | Sensorimotor-mouth – L accumbens area                          | 0.16  | 0.04, 0.28   | 0.09 |
|                            |                                           |       |              |      | Cingulo-parietal -R accumbens area                             | 0.18  | 0.06, 0.3    | 0.09 |
|                            |                                           |       |              |      | Cingulo-parietal - L hippocampus                               | 0.20  | 0.08, 0.33   | 0.09 |
| <b>Task-based fMRI</b>     |                                           |       |              |      |                                                                |       |              |      |
| <b>MID</b>                 |                                           |       |              |      |                                                                |       |              |      |
| <i>Reward anticipation</i> | R Marginal branch of the cingulate sulcus | -0.17 | -0.28, -0.07 | 0.07 | None                                                           | -     | -            |      |
|                            | R parieto-occipital sulcus                | -0.16 | -0.27, -0.05 | 0.08 |                                                                |       |              |      |
|                            | L calcarine sulcus                        | -0.16 | -0.27, -0.05 | 0.07 |                                                                |       |              |      |
|                            | R supramarginal gyrus                     | -0.16 | -0.27, -0.05 | 0.08 |                                                                |       |              |      |
|                            | L Marginal branch of the cingulate sulcus | -0.15 | -0.26, -0.04 | 0.08 |                                                                |       |              |      |
| <i>Loss anticipation</i>   | None                                      | -     | -            |      | L fronto-marginal gyrus and sulcus                             | -0.15 | -0.27, -0.04 | 0.09 |
| <i>Reward feedback</i>     | None                                      | -     | -            |      | R posterior segment of the lateral sulcus                      | -0.17 | -0.28, -0.06 | 0.07 |
| <i>Loss feedback</i>       | None                                      | -     | -            |      | R anterior segment of lateral sulcus that splits into vertical | 0.18  | 0.07, 0.3    | 0.10 |
|                            |                                           |       |              |      | L middle temporal gyrus                                        | 0.20  | 0.08, 0.31   | 0.10 |

**eTable 36. Results, 95% confidence intervals and area under precision-recall curve with effect sizes (Cohen’s *d*) largest than |0.15| for each imaging modality in child- and caregiver-suicidality group comparison**

|                                     | Child                                                   |       |              |      | Caregiver                                   |      |            |      |
|-------------------------------------|---------------------------------------------------------|-------|--------------|------|---------------------------------------------|------|------------|------|
|                                     | Parcellation                                            | ES    | 95%CI        | PRC  | Parcellation                                | ES   | 95%CI      | PRC  |
| <b>SST</b>                          |                                                         |       |              |      |                                             |      |            |      |
| <i>Incorrect stop vs correct go</i> | L superior occipital and transverse occipital sulci     | -0.15 | -0.27, -0.04 | 0.07 | None                                        | -    | -          | -    |
| <i>Correct stop vs correct go</i>   | L Superior segment of the circular sulcus of the insula | 0.16  | 0.05, 0.28   | 0.10 | None                                        | -    | -          | -    |
| <b>ENBack</b>                       |                                                         |       |              |      |                                             |      |            |      |
| <i>2-back vs 0-back</i>             | None                                                    | -     | -            | -    | None                                        | -    | -          | -    |
| <i>Emotional vs neutral faces</i>   | L lateral occipito-temporal sulcus                      | -0.17 | -0.29, -0.05 | 0.07 | R planum temporale- superior temporal gyrus | 0.16 | 0.04, 0.28 | 0.09 |
|                                     |                                                         |       |              |      | L temporal transverse sulcus                | 0.17 | 0.05, 0.29 | 0.09 |

PRC, area under precision-recall curve. ES, effect size. CI, confidence interval. L, left. R, right.

<sup>a</sup> Unique result that was statistically different ( $p_{FDR} < 0.05$ ) after FDR-correction for multiple comparisons.

## eReferences

1. Garavan H, Bartsch H, Conway K, et al. Recruiting the ABCD sample: Design considerations and procedures. *Developmental cognitive neuroscience*. 2018;32:16-22.
2. Kobak K, Kratochvil C, Stanger C, Kaufman J. Computerized screening of comorbidity in adolescents with substance or psychiatric disorders. Paper presented at: Poster presented at the 33rd annual anxiety disorders and depression conference, La Jolla, CA. Retrieved from [http://www.telepsychology.net/resources/KSADS\\_ADAAPosterv4.pdf](http://www.telepsychology.net/resources/KSADS_ADAAPosterv4.pdf)2013.
3. Luciana M, Bjork JM, Nagel BJ, et al. Adolescent neurocognitive development and impacts of substance use: Overview of the adolescent brain cognitive development (ABCD) baseline neurocognition battery. *Developmental cognitive neuroscience*. 2018;32:67-79.
4. Barch DM, Albaugh MD, Avenevoli S, et al. Demographic, physical and mental health assessments in the adolescent brain and cognitive development study: Rationale and description. *Developmental cognitive neuroscience*. 2018;32:55-66.
5. Zucker RA, Gonzalez R, Feldstein Ewing SW, et al. Assessment of culture and environment in the Adolescent Brain and Cognitive Development Study: Rationale, description of measures, and early data. *Developmental cognitive neuroscience*. 2018;32:107-120.
6. Knutson B, Westdorp A, Kaiser E, Hommer D. fMRI visualization of brain activity during a monetary incentive delay task. *NeuroImage*. 2000;12(1):20-27.
7. Logan GD. On the ability to inhibit thought and action: A users' guide to the stop signal paradigm. In: *Inhibitory processes in attention, memory, and language*. San Diego, CA, US: Academic Press; 1994:189-239.
8. Cohen A, Conley M, Dellarco D, Casey BJPotSfNSD, CA. November. The impact of emotional cues on short-term and long-term memory during adolescence. 2016.
9. Casey BJ, Cannonier T, Conley MI, et al. The Adolescent Brain Cognitive Development (ABCD) study: Imaging acquisition across 21 sites. *Developmental cognitive neuroscience*. 2018;32:43-54.
10. Hagler DJ, Jr., Hatton S, Cornejo MD, et al. Image processing and analysis methods for the Adolescent Brain Cognitive Development Study. *NeuroImage*. 2019:116091.
11. Gordon EM, Laumann TO, Adeyemo B, Huckins JF, Kelley WM, Petersen SE. Generation and Evaluation of a Cortical Area Parcellation from Resting-State Correlations. *Cereb Cortex*. 2016;26(1):288-303.
12. Van Dijk KR, Hedden T, Venkataraman A, Evans KC, Lazar SW, Buckner RL. Intrinsic functional connectivity as a tool for human connectomics: theory, properties, and optimization. *Journal of neurophysiology*. 2010;103(1):297-321.
13. Seibert TM, Brewer JB. Default network correlations analyzed on native surfaces. *Journal of neuroscience methods*. 2011;198(2):301-311.

14. Cohen AO, Breiner K, Steinberg L, et al. When Is an Adolescent an Adult? Assessing Cognitive Control in Emotional and Nonemotional Contexts. 2016;27(4):549-562.
15. Jollant F, Lawrence NS, Giampietro V, et al. Orbitofrontal cortex response to angry faces in men with histories of suicide attempts. *The American journal of psychiatry*. 2008;165(6):740-748.
16. Jollant F, Lawrence NS, Olie E, et al. Decreased activation of lateral orbitofrontal cortex during risky choices under uncertainty is associated with disadvantageous decision-making and suicidal behavior. *NeuroImage*. 2010;51(3):1275-1281.
17. Pan L, Segreti A, Almeida J, et al. Preserved hippocampal function during learning in the context of risk in adolescent suicide attempt. *Psychiatry research*. 2013;211(2):112-118.
18. Pan LA, Batezati-Alves SC, Almeida JR, et al. Dissociable patterns of neural activity during response inhibition in depressed adolescents with and without suicidal behavior. *Journal of the American Academy of Child and Adolescent Psychiatry*. 2011;50(6):602-611.e603.
19. Pan LA, Hassel S, Segreti AM, Nau SA, Brent DA, Phillips ML. Differential patterns of activity and functional connectivity in emotion processing neural circuitry to angry and happy faces in adolescents with and without suicide attempt. *Psychological medicine*. 2013;43(10):2129-2142.
20. Vanyukov PM, Szanto K, Hallquist MN, et al. Paralimbic and lateral prefrontal encoding of reward value during intertemporal choice in attempted suicide. *Psychological medicine*. 2016;46(2):381-391.
21. Xie W, Li H, Luo X, et al. Anhedonia and pain avoidance in the suicidal mind: behavioral evidence for motivational manifestations of suicidal ideation in patients with major depressive disorder. *Journal of clinical psychology*. 2014;70(7):681-692.
22. McHugh CM, Chun Lee RS, Hermens DF, Corderoy A, Large M, Hickie IB. Impulsivity in the self-harm and suicidal behavior of young people: A systematic review and meta-analysis. *Journal of psychiatric research*. 2019;116:51-60.
23. Bauer BW, Gustafsson HC, Nigg J, Karalunas SL. Working memory mediates increased negative affect and suicidal ideation in childhood attention-deficit/hyperactivity disorder. *J Psychopathol Behav Assess*. 2018;40(2):180-193.
24. Bomyea J, Stout DM, Simmons AN. Attenuated prefrontal and temporal neural activity during working memory as a potential biomarker of suicidal ideation in veterans with PTSD. *Journal of affective disorders*. 2019;257:607-614.
25. Seymour KE, Jones RN, Cushman GK, et al. Emotional face recognition in adolescent suicide attempters and adolescents engaging in non-suicidal self-injury. *European child & adolescent psychiatry*. 2016;25(3):247-259.



26. Cox RW. AFNI: software for analysis and visualization of functional magnetic resonance neuroimages. *Computers and biomedical research, an international journal*. 1996;29(3):162-173.
27. Destrieux C, Fischl B, Dale A, Halgren E. Automatic parcellation of human cortical gyri and sulci using standard anatomical nomenclature. *NeuroImage*. 2010;53(1):1-15.
28. Fischl B, Salat DH, Busa E, et al. Whole brain segmentation: automated labeling of neuroanatomical structures in the human brain. *Neuron*. 2002;33(3):341-355.
29. Pornpattananangkul N, Leibenluft E, Pine DS, Stringaris A. Mapping Anhedonia in Youth: Large-Scale Resting-State Network, Task-Evoked Activation and Phenotypic Demarcation. *JAMA psychiatry*. 2019.
30. Fortin JP, Parker D, Tunc B, et al. Harmonization of multi-site diffusion tensor imaging data. *NeuroImage*. 2017;161:149-170.
31. Nielson DM, Pereira F, Zheng CY, et al. Detecting and harmonizing scanner differences in the ABCD study - annual release 1.0. In:2018.
32. Dick AS, Garcia NL, Pruden SM, et al. No evidence for a bilingual executive function advantage in the nationally representative ABCD study. *Nature human behaviour*. 2019;3(7):692-701.
33. Ialongo C. The logic of equivalence testing and its use in laboratory medicine. *Biochimica medica*. 2017;27(1):5-13.
34. Lakens D. Equivalence Tests: A Practical Primer for t Tests, Correlations, and Meta-Analyses. *Social psychological and personality science*. 2017;8(4):355-362.
35. Schuirmann DJ. A comparison of the two one-sided tests procedure and the power approach for assessing the equivalence of average bioavailability. *Journal of pharmacokinetics and biopharmaceutics*. 1987;15(6):657-680.
36. Rentería ME, Schmaal L, Hibar DP, et al. Subcortical brain structure and suicidal behaviour in major depressive disorder: a meta-analysis from the ENIGMA-MDD working group. *Translational psychiatry*. 2017;7(5):e1116.
37. Cohen J. *Statistical power analysis for the behavioral sciences*. 2nd ed. Hillsdale, NJ: Erlbaum; 1988.
38. Lakens D, McLatchie N, Isager PM, Scheel AM, Dienes Z. Improving Inferences about Null Effects with Bayes Factors and Equivalence Tests. *The journals of gerontology Series B, Psychological sciences and social sciences*. 2018.
39. Saito T, Rehmsmeier M. The precision-recall plot is more informative than the ROC plot when evaluating binary classifiers on imbalanced datasets. *PloS one*. 2015;10(3):e0118432.
